# Supplementary material for: Whole-Blood Transcriptional Profiles Enable Early Prediction of the Presence of Coronary Atherosclerosis and High-Risk Plaque Features at Coronary CT Angiography
Source: MDPI journal article supplement (doi:10.3390/biomedicines10061309), 2022-06-02
Supplement: s1 [file s1]

**Supplementary Table S2.** Results of functional enrichment analysis

**CAD.vs.noCAD**

| NAME                                                           | Gene Ontology ID | SIZE | ES   | NES  | NOM p-val | q-value  |
|----------------------------------------------------------------|------------------|------|------|------|-----------|----------|
| CYTOPLASMIC TRANSLATION                                        | GO:0002181       | 107  | 0.59 | 7.37 | 0.00E+00  | 0.00E+00 |
| RRNA PROCESSING                                                | GO:0006364       | 160  | 0.33 | 4.77 | 0.00E+00  | 0.00E+00 |
| RRNA METABOLIC PROCESS                                         | GO:0016072       | 168  | 0.31 | 4.71 | 0.00E+00  | 0.00E+00 |
| OXIDATIVE PHOSPHORYLATION                                      | GO:0006119       | 89   | 0.36 | 4.04 | 0.00E+00  | 0.00E+00 |
| RIBOSOMAL LARGE SUBUNIT BIOGENESIS                             | GO:0042273       | 66   | 0.40 | 3.79 | 0.00E+00  | 0.00E+00 |
| RIBOSOME ASSEMBLY                                              | GO:0042255       | 51   | 0.43 | 3.73 | 0.00E+00  | 0.00E+00 |
| ATP METABOLIC PROCESS                                          | GO:0046034       | 139  | 0.26 | 3.66 | 0.00E+00  | 0.00E+00 |
| MITOCHONDRIAL ATP SYNTHESIS COUPLED ELECTRON TRANSPORT         | GO:0042775       | 66   | 0.38 | 3.66 | 0.00E+00  | 0.00E+00 |
| AEROBIC ELECTRON TRANSPORT CHAIN                               | GO:0019646       | 64   | 0.38 | 3.64 | 0.00E+00  | 0.00E+00 |
| ATP SYNTHESIS COUPLED ELECTRON TRANSPORT                       | GO:0042773       | 66   | 0.38 | 3.55 | 0.00E+00  | 0.00E+00 |
| AEROBIC RESPIRATION                                            | GO:0009060       | 115  | 0.28 | 3.54 | 0.00E+00  | 0.00E+00 |
| CELLULAR RESPIRATION                                           | GO:0045333       | 128  | 0.26 | 3.45 | 0.00E+00  | 0.00E+00 |
| MITOCHONDRIAL RESPIRATORY CHAIN COMPLEX ASSEMBLY               | GO:0033108       | 87   | 0.31 | 3.39 | 0.00E+00  | 0.00E+00 |
| RESPIRATORY ELECTRON TRANSPORT CHAIN                           | GO:0022904       | 75   | 0.32 | 3.37 | 0.00E+00  | 0.00E+00 |
| MITOCHONDRIAL ELECTRON TRANSPORT, NADH TO UBIQUINONE           | GO:0006120       | 40   | 0.45 | 3.37 | 0.00E+00  | 0.00E+00 |
| NADH DEHYDROGENASE COMPLEX ASSEMBLY                            | GO:0010257       | 56   | 0.38 | 3.36 | 0.00E+00  | 0.00E+00 |
| MITOCHONDRIAL RESPIRATORY CHAIN COMPLEX I ASSEMBLY             | GO:0032981       | 56   | 0.38 | 3.32 | 0.00E+00  | 0.00E+00 |
| ELECTRON TRANSPORT CHAIN                                       | GO:0022900       | 80   | 0.31 | 3.28 | 0.00E+00  | 0.00E+00 |
| RIBOSOMAL SMALL SUBUNIT BIOGENESIS                             | GO:0042274       | 63   | 0.35 | 3.22 | 0.00E+00  | 0.00E+00 |
| HUMORAL IMMUNE RESPONSE MEDIATED BY CIRCULATING IMMUNOGLOBULIN | GO:0002455       | 59   | 0.34 | 3.13 | 0.00E+00  | 3.45E-05 |
| COMPLEMENT ACTIVATION, CLASSICAL PATHWAY                       | GO:0006958       | 57   | 0.34 | 3.09 | 0.00E+00  | 4.83E-05 |
| ENERGY DERIVATION BY OXIDATION OF ORGANIC COMPOUNDS            | GO:0015980       | 149  | 0.22 | 3.08 | 0.00E+00  | 4.61E-05 |
| HUMORAL IMMUNE RESPONSE                                        | GO:0006959       | 140  | 0.22 | 3.02 | 0.00E+00  | 4.41E-05 |
| PHAGOCYTOSIS, RECOGNITION                                      | GO:0006910       | 61   | 0.33 | 3.00 | 0.00E+00  | 4.22E-05 |
| COMPLEMENT ACTIVATION                                          | GO:0006956       | 70   | 0.30 | 2.96 | 0.00E+00  | 6.74E-05 |
| RIBONUCLEOPROTEIN COMPLEX ASSEMBLY                             | GO:0022618       | 154  | 0.20 | 2.95 | 0.00E+00  | 7.73E-05 |
| RIBONUCLEOPROTEIN COMPLEX SUBUNIT ORGANIZATION                 | GO:0071826       | 160  | 0.20 | 2.83 | 0.00E+00  | 1.73E-04 |
| B CELL MEDIATED IMMUNITY                                       | GO:0019724       | 79   | 0.26 | 2.69 | 0.00E+00  | 5.32E-04 |
| IMMUNOGLOBULIN MEDIATED IMMUNE RESPONSE                        | GO:0016064       | 76   | 0.25 | 2.62 | 0.00E+00  | 7.24E-04 |

|                                                                                                                           |            |     |      |      |          |          |
|---------------------------------------------------------------------------------------------------------------------------|------------|-----|------|------|----------|----------|
| ADAPTIVE IMMUNE RESPONSE BASED ON SOMATIC RECOMBINATION OF IMMUNE RECEPTORS BUILT FROM IMMUNOGLOBULIN SUPERFAMILY DOMAINS | GO:0002460 | 108 | 0.21 | 2.53 | 0.00E+00 | 1.55E-03 |
| MATURATION OF SSU-RRNA                                                                                                    | GO:0030490 | 41  | 0.33 | 2.49 | 0.00E+00 | 1.86E-03 |
| MITOCHONDRIAL TRANSPORT                                                                                                   | GO:0006839 | 162 | 0.17 | 2.49 | 0.00E+00 | 1.85E-03 |
| NUCLEOSIDE TRIPHOSPHATE BIOSYNTHETIC PROCESS                                                                              | GO:0009142 | 37  | 0.34 | 2.49 | 0.00E+00 | 1.84E-03 |
| PHAGOCYTOSIS, ENGULFMENT                                                                                                  | GO:0006911 | 84  | 0.22 | 2.37 | 0.00E+00 | 3.67E-03 |
| SPLICEOSOMAL SNRNP ASSEMBLY                                                                                               | GO:0000387 | 35  | 0.33 | 2.32 | 0.00E+00 | 5.20E-03 |
| CELL RECOGNITION                                                                                                          | GO:0008037 | 103 | 0.20 | 2.30 | 0.00E+00 | 5.91E-03 |
| PLASMA MEMBRANE INVAGINATION                                                                                              | GO:0099024 | 91  | 0.20 | 2.25 | 2.08E-03 | 7.72E-03 |
| LYMPHOCYTE MEDIATED IMMUNITY                                                                                              | GO:0002449 | 108 | 0.18 | 2.21 | 2.00E-03 | 9.68E-03 |
| RIBONUCLEOSIDE TRIPHOSPHATE BIOSYNTHETIC PROCESS                                                                          | GO:0009201 | 31  | 0.33 | 2.21 | 4.02E-03 | 9.59E-03 |
| ESTABLISHMENT OF PROTEIN LOCALIZATION TO MITOCHONDRION                                                                    | GO:0072655 | 60  | 0.24 | 2.12 | 0.00E+00 | 1.74E-02 |
| RRNA MODIFICATION                                                                                                         | GO:0000154 | 31  | 0.31 | 2.11 | 0.00E+00 | 1.79E-02 |
| TRNA PROCESSING                                                                                                           | GO:0008033 | 103 | 0.18 | 2.07 | 1.98E-03 | 2.19E-02 |
| B CELL RECEPTOR SIGNALING PATHWAY                                                                                         | GO:0050853 | 88  | 0.19 | 2.04 | 2.03E-03 | 2.59E-02 |
| PURINE NUCLEOSIDE DIPHOSPHATE METABOLIC PROCESS                                                                           | GO:0009135 | 32  | 0.29 | 2.03 | 4.23E-03 | 2.70E-02 |
| MEMBRANE INVAGINATION                                                                                                     | GO:0010324 | 98  | 0.17 | 1.99 | 8.06E-03 | 3.40E-02 |
| PROTON TRANSMEMBRANE TRANSPORT                                                                                            | GO:1902600 | 41  | 0.27 | 1.99 | 3.94E-03 | 3.36E-02 |
| POSITIVE REGULATION OF B CELL ACTIVATION                                                                                  | GO:0050871 | 102 | 0.17 | 1.98 | 2.02E-03 | 3.36E-02 |
| MITOCHONDRIAL TRANSMEMBRANE TRANSPORT                                                                                     | GO:1990542 | 79  | 0.19 | 1.97 | 1.44E-02 | 3.52E-02 |
| MITOCHONDRIAL TRANSLATION                                                                                                 | GO:0032543 | 47  | 0.24 | 1.94 | 6.30E-03 | 4.07E-02 |
| MITOCHONDRIAL MEMBRANE ORGANIZATION                                                                                       | GO:0007006 | 81  | 0.18 | 1.92 | 1.02E-02 | 4.72E-02 |
| PROTEIN TARGETING TO MITOCHONDRION                                                                                        | GO:0006626 | 50  | 0.23 | 1.90 | 2.02E-02 | 5.09E-02 |
| NUCLEOTIDE PHOSPHORYLATION                                                                                                | GO:0046939 | 31  | 0.28 | 1.88 | 6.41E-03 | 5.53E-02 |
| PURINE RIBONUCLEOSIDE DIPHOSPHATE METABOLIC PROCESS                                                                       | GO:0009179 | 31  | 0.28 | 1.87 | 1.22E-02 | 5.75E-02 |
| TRNA METABOLIC PROCESS                                                                                                    | GO:0006399 | 147 | 0.13 | 1.86 | 1.00E-02 | 5.99E-02 |
| LEUKOCYTE MEDIATED IMMUNITY                                                                                               | GO:0002443 | 125 | 0.14 | 1.82 | 3.84E-03 | 7.14E-02 |
| PROTEIN LOCALIZATION TO MITOCHONDRION                                                                                     | GO:0070585 | 65  | 0.19 | 1.80 | 8.05E-03 | 7.79E-02 |
| HEXOSE METABOLIC PROCESS                                                                                                  | GO:0019318 | 63  | 0.19 | 1.80 | 1.72E-02 | 7.75E-02 |
| PROTEIN FOLDING                                                                                                           | GO:0006457 | 145 | 0.13 | 1.79 | 1.83E-02 | 8.09E-02 |
| MITOCHONDRIAL GENE EXPRESSION                                                                                             | GO:0140053 | 78  | 0.17 | 1.75 | 2.29E-02 | 9.93E-02 |
| NUCLEOSIDE DIPHOSPHATE PHOSPHORYLATION                                                                                    | GO:0006165 | 30  | 0.26 | 1.75 | 1.71E-02 | 9.92E-02 |
| ADAPTIVE IMMUNE RESPONSE                                                                                                  | GO:0002250 | 130 | 0.13 | 1.72 | 2.12E-02 | 1.13E-01 |

|                                                                      |            |     |      |      |          |          |
|----------------------------------------------------------------------|------------|-----|------|------|----------|----------|
| MATURATION OF 5.8S RRNA                                              | GO:0000460 | 31  | 0.25 | 1.70 | 3.07E-02 | 1.25E-01 |
| PROTEIN INSERTION INTO MEMBRANE                                      | GO:0051205 | 43  | 0.21 | 1.69 | 2.42E-02 | 1.25E-01 |
| GLUTAMINE FAMILY AMINO ACID METABOLIC PROCESS                        | GO:0009064 | 32  | 0.25 | 1.67 | 3.09E-02 | 1.40E-01 |
| REGULATION OF MITOCHONDRIAL MEMBRANE PERMEABILITY                    | GO:0046902 | 39  | 0.22 | 1.66 | 2.75E-02 | 1.43E-01 |
| CYTOCHROME COMPLEX ASSEMBLY                                          | GO:0017004 | 32  | 0.25 | 1.66 | 3.31E-02 | 1.43E-01 |
| TRANSLATIONAL INITIATION                                             | GO:0006413 | 46  | 0.21 | 1.64 | 3.81E-02 | 1.48E-01 |
| MONOSACCHARIDE METABOLIC PROCESS                                     | GO:0005996 | 73  | 0.16 | 1.64 | 2.61E-02 | 1.47E-01 |
| RIBONUCLEOSIDE DIPHOSPHATE METABOLIC PROCESS                         | GO:0009185 | 34  | 0.23 | 1.63 | 3.67E-02 | 1.55E-01 |
| REGULATION OF MEMBRANE PERMEABILITY                                  | GO:0090559 | 45  | 0.21 | 1.63 | 4.17E-02 | 1.55E-01 |
| NUCLEOSIDE DIPHOSPHATE METABOLIC PROCESS                             | GO:0009132 | 42  | 0.21 | 1.60 | 4.82E-02 | 1.74E-01 |
| RESPONSE TO HEXOSE                                                   | GO:0009746 | 38  | 0.20 | 1.52 | 4.64E-02 | 2.48E-01 |
| GLUCOSE METABOLIC PROCESS                                            | GO:0006006 | 42  | 0.19 | 1.51 | 7.47E-02 | 2.57E-01 |
| RNA MODIFICATION                                                     | GO:0009451 | 137 | 0.11 | 1.50 | 6.17E-02 | 2.66E-01 |
| RESPONSE TO MONOSACCHARIDE                                           | GO:0034284 | 38  | 0.20 | 1.49 | 5.97E-02 | 2.72E-01 |
| PURINE RIBONUCLEOSIDE TRIPHOSPHATE METABOLIC PROCESS                 | GO:0009205 | 39  | 0.20 | 1.45 | 8.98E-02 | 3.13E-01 |
| NEGATIVE REGULATION OF UBIQUITIN-DEPENDENT PROTEIN CATABOLIC PROCESS | GO:2000059 | 39  | 0.20 | 1.45 | 9.29E-02 | 3.16E-01 |
| PROTEIN TRANSMEMBRANE IMPORT INTO INTRACELLULAR ORGANELLE            | GO:0044743 | 30  | 0.21 | 1.41 | 9.36E-02 | 3.63E-01 |
| ANTIMICROBIAL HUMORAL RESPONSE                                       | GO:0019730 | 48  | 0.17 | 1.41 | 1.24E-01 | 3.68E-01 |
| DNA-TEMPLATED TRANSCRIPTION, ELONGATION                              | GO:0006354 | 35  | 0.20 | 1.40 | 1.15E-01 | 3.72E-01 |
| CELLULAR RESPONSE TO HEAT                                            | GO:0034605 | 36  | 0.20 | 1.40 | 1.08E-01 | 3.72E-01 |
| NUCLEOSIDE TRIPHOSPHATE METABOLIC PROCESS                            | GO:0009141 | 55  | 0.16 | 1.37 | 1.20E-01 | 4.08E-01 |
| NUCLEOTIDE CATABOLIC PROCESS                                         | GO:0009166 | 44  | 0.17 | 1.37 | 1.25E-01 | 4.05E-01 |
| AMINO ACID ACTIVATION                                                | GO:0043038 | 38  | 0.19 | 1.37 | 1.20E-01 | 4.07E-01 |
| TRNA AMINOACYLATION                                                  | GO:0043039 | 38  | 0.19 | 1.37 | 1.32E-01 | 4.04E-01 |
| DICARBOXYLIC ACID METABOLIC PROCESS                                  | GO:0043648 | 54  | 0.16 | 1.36 | 1.26E-01 | 4.07E-01 |
| AMINO ACID TRANSPORT                                                 | GO:0006865 | 48  | 0.17 | 1.35 | 1.21E-01 | 4.12E-01 |
| RESPONSE TO GLUCOSE                                                  | GO:0009749 | 36  | 0.19 | 1.33 | 1.26E-01 | 4.49E-01 |
| REGULATION OF MITOCHONDRIAL MEMBRANE POTENTIAL                       | GO:0051881 | 39  | 0.18 | 1.33 | 1.33E-01 | 4.45E-01 |
| NCRNA 3'-END PROCESSING                                              | GO:0043628 | 35  | 0.19 | 1.33 | 1.57E-01 | 4.42E-01 |
| REACTIVE OXYGEN SPECIES METABOLIC PROCESS                            | GO:0072593 | 51  | 0.16 | 1.33 | 1.45E-01 | 4.40E-01 |
| PROTEIN TARGETING                                                    | GO:0006605 | 185 | 0.08 | 1.31 | 1.50E-01 | 4.59E-01 |
| POSITIVE REGULATION OF INTRINSIC APOPTOTIC SIGNALING PATHWAY         | GO:2001244 | 35  | 0.19 | 1.29 | 1.59E-01 | 4.97E-01 |
| RNA METHYLATION                                                      | GO:0001510 | 69  | 0.13 | 1.29 | 1.78E-01 | 4.93E-01 |

|                                                                                   |            |     |      |      |          |          |
|-----------------------------------------------------------------------------------|------------|-----|------|------|----------|----------|
| DEFENSE RESPONSE TO BACTERIUM                                                     | GO:0042742 | 148 | 0.09 | 1.28 | 1.75E-01 | 5.01E-01 |
| PYRUVATE METABOLIC PROCESS                                                        | GO:0006090 | 36  | 0.18 | 1.28 | 1.79E-01 | 4.97E-01 |
| RESPONSE TO CARBOHYDRATE                                                          | GO:0009743 | 43  | 0.16 | 1.28 | 1.52E-01 | 4.93E-01 |
| RIBONUCLEOSIDE TRIPHOSPHATE METABOLIC PROCESS                                     | GO:0009199 | 43  | 0.16 | 1.27 | 1.71E-01 | 5.04E-01 |
| POSITIVE REGULATION OF TRANSLATION                                                | GO:0045727 | 98  | 0.11 | 1.27 | 1.90E-01 | 4.99E-01 |
| RESPONSE TO TEMPERATURE STIMULUS                                                  | GO:0009266 | 69  | 0.13 | 1.27 | 1.73E-01 | 4.94E-01 |
| TRNA MODIFICATION                                                                 | GO:0006400 | 73  | 0.13 | 1.27 | 1.79E-01 | 4.92E-01 |
| RESPONSE TO HEAT                                                                  | GO:0009408 | 50  | 0.15 | 1.26 | 1.99E-01 | 5.12E-01 |
| REGULATION OF GENERATION OF PRECURSOR METABOLITES AND ENERGY                      | GO:0043467 | 81  | 0.12 | 1.25 | 1.76E-01 | 5.21E-01 |
| SMALL MOLECULE CATABOLIC PROCESS                                                  | GO:0044282 | 200 | 0.07 | 1.24 | 1.93E-01 | 5.37E-01 |
| VIRION ASSEMBLY                                                                   | GO:0019068 | 31  | 0.18 | 1.23 | 2.17E-01 | 5.48E-01 |
| SNRNA METABOLIC PROCESS                                                           | GO:0016073 | 36  | 0.17 | 1.23 | 2.08E-01 | 5.52E-01 |
| TRNA AMINOACYLATION FOR PROTEIN TRANSLATION                                       | GO:0006418 | 35  | 0.18 | 1.22 | 2.31E-01 | 5.50E-01 |
| RENAL SYSTEM PROCESS                                                              | GO:0003014 | 40  | 0.16 | 1.22 | 2.21E-01 | 5.54E-01 |
| ANTIMICROBIAL HUMORAL IMMUNE RESPONSE MEDIATED BY ANTIMICROBIAL PEPTIDE           | GO:0061844 | 32  | 0.18 | 1.20 | 2.35E-01 | 5.81E-01 |
| TETRAPYRROLE METABOLIC PROCESS                                                    | GO:0033013 | 37  | 0.17 | 1.20 | 2.58E-01 | 5.80E-01 |
| REGULATION OF B CELL ACTIVATION                                                   | GO:0050864 | 133 | 0.09 | 1.20 | 2.47E-01 | 5.75E-01 |
| PIGMENT METABOLIC PROCESS                                                         | GO:0042440 | 37  | 0.17 | 1.20 | 2.16E-01 | 5.72E-01 |
| POSITIVE REGULATION OF ESTABLISHMENT OF PROTEIN LOCALIZATION TO MITOCHONDRION     | GO:1903749 | 33  | 0.17 | 1.19 | 2.39E-01 | 5.90E-01 |
| NEGATIVE REGULATION OF PROTEOLYSIS INVOLVED IN CELLULAR PROTEIN CATABOLIC PROCESS | GO:1903051 | 49  | 0.15 | 1.19 | 2.42E-01 | 5.86E-01 |
| INTRACELLULAR PROTEIN TRANSMEMBRANE TRANSPORT                                     | GO:0065002 | 42  | 0.15 | 1.19 | 2.27E-01 | 5.82E-01 |
| INNER MITOCHONDRIAL MEMBRANE ORGANIZATION                                         | GO:0007007 | 32  | 0.18 | 1.18 | 2.37E-01 | 5.83E-01 |
| STEROID BIOSYNTHETIC PROCESS                                                      | GO:0006694 | 53  | 0.14 | 1.18 | 2.43E-01 | 5.80E-01 |
| PLATELET AGGREGATION                                                              | GO:0070527 | 30  | 0.18 | 1.18 | 2.39E-01 | 5.77E-01 |
| RETINA HOMEOSTASIS                                                                | GO:0001895 | 36  | 0.16 | 1.18 | 2.46E-01 | 5.78E-01 |
| CELLULAR KETONE METABOLIC PROCESS                                                 | GO:0042180 | 43  | 0.15 | 1.18 | 2.49E-01 | 5.76E-01 |
| CELLULAR AMINO ACID METABOLIC PROCESS                                             | GO:0006520 | 158 | 0.08 | 1.16 | 2.71E-01 | 6.04E-01 |
| CHAPERONE-MEDIATED PROTEIN FOLDING                                                | GO:0061077 | 50  | 0.14 | 1.16 | 2.85E-01 | 6.02E-01 |
| NEGATIVE REGULATION OF PROTEASOMAL PROTEIN CATABOLIC PROCESS                      | GO:1901799 | 37  | 0.16 | 1.16 | 2.42E-01 | 5.98E-01 |
| NEGATIVE REGULATION OF PROTEIN CATABOLIC PROCESS                                  | GO:0042177 | 84  | 0.11 | 1.16 | 2.44E-01 | 5.96E-01 |

|                                                                 |            |     |      |      |          |          |
|-----------------------------------------------------------------|------------|-----|------|------|----------|----------|
| TRNA METHYLATION                                                | GO:0030488 | 33  | 0.17 | 1.15 | 2.55E-01 | 6.01E-01 |
| TRANSCRIPTION ELONGATION FROM RNA POLYMERASE II PROMOTER        | GO:0006368 | 33  | 0.17 | 1.15 | 2.61E-01 | 5.98E-01 |
| NUCLEOSIDE PHOSPHATE CATABOLIC PROCESS                          | GO:1901292 | 51  | 0.13 | 1.15 | 2.70E-01 | 5.98E-01 |
| ORGANIC ACID CATABOLIC PROCESS                                  | GO:0016054 | 136 | 0.09 | 1.15 | 2.53E-01 | 5.97E-01 |
| PURINE NUCLEOSIDE TRIPHOSPHATE METABOLIC PROCESS                | GO:0009144 | 42  | 0.15 | 1.14 | 2.64E-01 | 6.08E-01 |
| REGULATION OF UBIQUITIN-PROTEIN TRANSFERASE ACTIVITY            | GO:0051438 | 43  | 0.15 | 1.13 | 2.93E-01 | 6.18E-01 |
| FATTY ACID OXIDATION                                            | GO:0019395 | 55  | 0.13 | 1.13 | 2.82E-01 | 6.14E-01 |
| VIRAL GENE EXPRESSION                                           | GO:0019080 | 47  | 0.14 | 1.13 | 3.04E-01 | 6.14E-01 |
| CHROMATIN ASSEMBLY OR DISASSEMBLY                               | GO:0006333 | 82  | 0.10 | 1.13 | 2.98E-01 | 6.17E-01 |
| CARBOXYLIC ACID CATABOLIC PROCESS                               | GO:0046395 | 133 | 0.08 | 1.13 | 2.90E-01 | 6.14E-01 |
| REGULATION OF CHOLESTEROL TRANSPORT                             | GO:0032374 | 31  | 0.17 | 1.13 | 2.96E-01 | 6.12E-01 |
| REGULATION OF STEROL TRANSPORT                                  | GO:0032371 | 31  | 0.17 | 1.12 | 3.10E-01 | 6.09E-01 |
| NCRNA TRANSCRIPTION                                             | GO:0098781 | 31  | 0.17 | 1.12 | 3.24E-01 | 6.10E-01 |
| NEGATIVE REGULATION OF RESPONSE TO ENDOPLASMIC RETICULUM STRESS | GO:1903573 | 35  | 0.16 | 1.12 | 3.21E-01 | 6.16E-01 |
| ALPHA-AMINO ACID METABOLIC PROCESS                              | GO:1901605 | 89  | 0.10 | 1.12 | 3.20E-01 | 6.15E-01 |
| MITOCHONDRIAL RNA METABOLIC PROCESS                             | GO:0000959 | 41  | 0.15 | 1.10 | 3.24E-01 | 6.38E-01 |
| REGULATION OF TOR SIGNALING                                     | GO:0032006 | 80  | 0.10 | 1.10 | 3.22E-01 | 6.46E-01 |
| SENSORY PERCEPTION OF MECHANICAL STIMULUS                       | GO:0050954 | 41  | 0.14 | 1.10 | 3.24E-01 | 6.42E-01 |
| HOMOTYPIC CELL-CELL ADHESION                                    | GO:0034109 | 34  | 0.16 | 1.09 | 3.28E-01 | 6.38E-01 |
| POSITIVE REGULATION OF CELLULAR AMIDE METABOLIC PROCESS         | GO:0034250 | 118 | 0.09 | 1.09 | 3.34E-01 | 6.51E-01 |
| REGULATION OF ATP METABOLIC PROCESS                             | GO:1903578 | 53  | 0.12 | 1.08 | 3.24E-01 | 6.59E-01 |
| CHROMATIN ORGANIZATION                                          | GO:0006325 | 183 | 0.07 | 1.08 | 3.42E-01 | 6.60E-01 |
| REGULATION OF T CELL RECEPTOR SIGNALING PATHWAY                 | GO:0050856 | 33  | 0.16 | 1.08 | 3.52E-01 | 6.56E-01 |
| NEGATIVE REGULATION OF PROTEIN BINDING                          | GO:0032091 | 61  | 0.12 | 1.08 | 3.29E-01 | 6.55E-01 |
| POSITIVE REGULATION OF TOR SIGNALING                            | GO:0032008 | 38  | 0.15 | 1.07 | 3.64E-01 | 6.56E-01 |
| ANTIGEN RECEPTOR-MEDIATED SIGNALING PATHWAY                     | GO:0050851 | 151 | 0.07 | 1.07 | 3.69E-01 | 6.56E-01 |
| PROTEIN TRANSMEMBRANE TRANSPORT                                 | GO:0071806 | 43  | 0.14 | 1.07 | 3.59E-01 | 6.62E-01 |
| PROTEIN K63-LINKED UBIQUITINATION                               | GO:0070534 | 39  | 0.15 | 1.06 | 3.69E-01 | 6.62E-01 |
| PLATELET ACTIVATION                                             | GO:0030168 | 60  | 0.12 | 1.06 | 3.60E-01 | 6.62E-01 |
| LIPID OXIDATION                                                 | GO:0034440 | 58  | 0.12 | 1.06 | 3.56E-01 | 6.62E-01 |
| BASE-EXCISION REPAIR                                            | GO:0006284 | 33  | 0.16 | 1.05 | 3.77E-01 | 6.68E-01 |
| REGULATION OF PROTEIN TARGETING                                 | GO:1903533 | 59  | 0.12 | 1.05 | 3.96E-01 | 6.82E-01 |
| PYRIMIDINE-CONTAINING COMPOUND METABOLIC PROCESS                | GO:0072527 | 51  | 0.13 | 1.04 | 3.82E-01 | 6.80E-01 |

|                                                                      |            |     |      |      |          |          |
|----------------------------------------------------------------------|------------|-----|------|------|----------|----------|
| REGULATION OF PURINE NUCLEOTIDE METABOLIC PROCESS                    | GO:1900542 | 45  | 0.13 | 1.04 | 3.75E-01 | 6.82E-01 |
| OLEFINIC COMPOUND METABOLIC PROCESS                                  | GO:0120254 | 53  | 0.12 | 1.04 | 3.81E-01 | 6.82E-01 |
| CARBOHYDRATE METABOLIC PROCESS                                       | GO:0005975 | 196 | 0.06 | 1.04 | 4.04E-01 | 6.84E-01 |
| CARBOHYDRATE BIOSYNTHETIC PROCESS                                    | GO:0016051 | 54  | 0.12 | 1.02 | 4.01E-01 | 7.08E-01 |
| PROTEIN MATURATION                                                   | GO:0051604 | 156 | 0.07 | 1.02 | 4.14E-01 | 7.15E-01 |
| REGULATION OF INSULIN SECRETION                                      | GO:0050796 | 56  | 0.12 | 1.01 | 3.98E-01 | 7.18E-01 |
| NUCLEOSOME ORGANIZATION                                              | GO:0034728 | 80  | 0.10 | 1.01 | 4.16E-01 | 7.14E-01 |
| REGULATION OF TRANSCRIPTION BY RNA POLYMERASE I                      | GO:0006356 | 30  | 0.16 | 1.01 | 4.33E-01 | 7.13E-01 |
| NUCLEIC ACID PHOSPHODIESTER BOND HYDROLYSIS                          | GO:0090305 | 98  | 0.09 | 1.00 | 4.41E-01 | 7.24E-01 |
| TELOMERE MAINTENANCE                                                 | GO:0000723 | 64  | 0.11 | 1.00 | 4.12E-01 | 7.20E-01 |
| REGULATION OF FIBROBLAST PROLIFERATION                               | GO:0048145 | 36  | 0.14 | 1.00 | 4.30E-01 | 7.18E-01 |
| CELL KILLING                                                         | GO:0001906 | 40  | 0.13 | 1.00 | 4.18E-01 | 7.23E-01 |
| REGULATION OF NUCLEOTIDE METABOLIC PROCESS                           | GO:0006140 | 46  | 0.12 | 1.00 | 4.35E-01 | 7.23E-01 |
| POSITIVE REGULATION OF PROTEIN LOCALIZATION TO NUCLEUS               | GO:1900182 | 55  | 0.12 | 0.99 | 4.47E-01 | 7.28E-01 |
| MONOCARBOXYLIC ACID CATABOLIC PROCESS                                | GO:0072329 | 74  | 0.10 | 0.99 | 4.74E-01 | 7.34E-01 |
| PROTEIN TARGETING TO MEMBRANE                                        | GO:0006612 | 70  | 0.10 | 0.98 | 4.47E-01 | 7.35E-01 |
| NEGATIVE REGULATION OF CELLULAR PROTEIN CATABOLIC PROCESS            | GO:1903363 | 59  | 0.11 | 0.98 | 4.64E-01 | 7.40E-01 |
| FATTY ACID CATABOLIC PROCESS                                         | GO:0009062 | 66  | 0.10 | 0.98 | 4.80E-01 | 7.45E-01 |
| CARBOHYDRATE CATABOLIC PROCESS                                       | GO:0016052 | 61  | 0.11 | 0.97 | 4.72E-01 | 7.47E-01 |
| DEFENSE RESPONSE TO GRAM-NEGATIVE BACTERIUM                          | GO:0050829 | 36  | 0.13 | 0.96 | 5.10E-01 | 7.79E-01 |
| DNA MODIFICATION                                                     | GO:0006304 | 57  | 0.11 | 0.95 | 5.01E-01 | 7.81E-01 |
| SENSORY PERCEPTION OF SOUND                                          | GO:0007605 | 39  | 0.13 | 0.95 | 5.08E-01 | 7.79E-01 |
| ORGANOPHOSPHATE CATABOLIC PROCESS                                    | GO:0046434 | 82  | 0.09 | 0.95 | 5.01E-01 | 7.78E-01 |
| TUMOR NECROSIS FACTOR-MEDIATED SIGNALING PATHWAY                     | GO:0033209 | 33  | 0.14 | 0.95 | 5.01E-01 | 7.73E-01 |
| REGULATION OF ESTABLISHMENT OF PROTEIN LOCALIZATION TO MITOCHONDRION | GO:1903747 | 42  | 0.13 | 0.94 | 5.14E-01 | 7.80E-01 |
| EPITHELIAL TUBE FORMATION                                            | GO:0072175 | 31  | 0.14 | 0.94 | 5.25E-01 | 7.78E-01 |
| FATTY ACID BETA-OXIDATION                                            | GO:0006635 | 45  | 0.12 | 0.94 | 5.10E-01 | 7.79E-01 |
| POSITIVE REGULATION OF APOPTOTIC SIGNALING PATHWAY                   | GO:2001235 | 66  | 0.10 | 0.94 | 5.21E-01 | 7.79E-01 |
| NEGATIVE REGULATION OF HISTONE MODIFICATION                          | GO:0031057 | 30  | 0.14 | 0.93 | 5.37E-01 | 7.85E-01 |
| APOPTOTIC MITOCHONDRIAL CHANGES                                      | GO:0008637 | 39  | 0.13 | 0.93 | 5.18E-01 | 7.82E-01 |
| INTRINSIC APOPTOTIC SIGNALING PATHWAY BY P53 CLASS MEDIATOR          | GO:0072332 | 31  | 0.14 | 0.93 | 5.37E-01 | 7.83E-01 |
| REGULATION OF MEMBRANE POTENTIAL                                     | GO:0042391 | 144 | 0.07 | 0.93 | 5.59E-01 | 7.87E-01 |
| MORPHOGENESIS OF EMBRYONIC EPITHELIUM                                | GO:0016331 | 30  | 0.14 | 0.92 | 5.33E-01 | 7.88E-01 |

|                                                           |            |     |      |      |          |          |
|-----------------------------------------------------------|------------|-----|------|------|----------|----------|
| REGULATION OF PEPTIDE SECRETION                           | GO:0002791 | 66  | 0.10 | 0.92 | 5.33E-01 | 7.88E-01 |
| REGULATION OF PROTEIN TARGETING TO MITOCHONDRION          | GO:1903214 | 36  | 0.13 | 0.92 | 5.53E-01 | 7.86E-01 |
| PURINE RIBONUCLEOTIDE BIOSYNTHETIC PROCESS                | GO:0009152 | 90  | 0.08 | 0.92 | 5.57E-01 | 7.86E-01 |
| TELOMERE ORGANIZATION                                     | GO:0032200 | 66  | 0.09 | 0.90 | 5.85E-01 | 8.16E-01 |
| POSITIVE REGULATION OF MITOCHONDRION ORGANIZATION         | GO:0010822 | 59  | 0.10 | 0.89 | 5.68E-01 | 8.32E-01 |
| POSTSYNAPSE ORGANIZATION                                  | GO:0099173 | 33  | 0.13 | 0.89 | 6.02E-01 | 8.33E-01 |
| REGULATION OF INTRINSIC APOPTOTIC SIGNALING PATHWAY       | GO:2001242 | 110 | 0.07 | 0.89 | 5.83E-01 | 8.30E-01 |
| REGULATION OF PEPTIDE TRANSPORT                           | GO:0090087 | 68  | 0.09 | 0.88 | 5.90E-01 | 8.36E-01 |
| MEMBRANE ASSEMBLY                                         | GO:0071709 | 34  | 0.13 | 0.88 | 6.25E-01 | 8.35E-01 |
| CELLULAR LIPID CATABOLIC PROCESS                          | GO:0044242 | 120 | 0.07 | 0.88 | 5.85E-01 | 8.33E-01 |
| REGULATION OF LIPID TRANSPORT                             | GO:0032368 | 56  | 0.10 | 0.88 | 5.62E-01 | 8.35E-01 |
| MEMBRANE BIOGENESIS                                       | GO:0044091 | 37  | 0.12 | 0.87 | 6.06E-01 | 8.43E-01 |
| ESTABLISHMENT OF PROTEIN LOCALIZATION TO MEMBRANE         | GO:0090150 | 160 | 0.06 | 0.87 | 6.23E-01 | 8.40E-01 |
| NUCLEOSIDE METABOLIC PROCESS                              | GO:0009116 | 31  | 0.13 | 0.87 | 5.99E-01 | 8.39E-01 |
| RESPONSE TO OXIDATIVE STRESS                              | GO:0006979 | 194 | 0.05 | 0.87 | 6.14E-01 | 8.35E-01 |
| CELLULAR AMINO ACID CATABOLIC PROCESS                     | GO:0009063 | 53  | 0.10 | 0.87 | 6.30E-01 | 8.36E-01 |
| ICOSANOID METABOLIC PROCESS                               | GO:0006690 | 59  | 0.10 | 0.86 | 6.13E-01 | 8.35E-01 |
| PROTEIN TETRAMERIZATION                                   | GO:0051262 | 49  | 0.10 | 0.86 | 6.48E-01 | 8.34E-01 |
| CELLULAR MODIFIED AMINO ACID METABOLIC PROCESS            | GO:0006575 | 84  | 0.08 | 0.86 | 6.34E-01 | 8.37E-01 |
| REGULATION OF MITOCHONDRION ORGANIZATION                  | GO:0010821 | 107 | 0.07 | 0.86 | 6.49E-01 | 8.35E-01 |
| PROTEIN-DNA COMPLEX SUBUNIT ORGANIZATION                  | GO:0071824 | 120 | 0.07 | 0.86 | 6.19E-01 | 8.34E-01 |
| REGULATION OF ANTIGEN RECEPTOR-MEDIATED SIGNALING PATHWAY | GO:0050854 | 49  | 0.10 | 0.86 | 6.27E-01 | 8.33E-01 |
| REGULATION OF PEPTIDE HORMONE SECRETION                   | GO:0090276 | 65  | 0.09 | 0.85 | 6.23E-01 | 8.31E-01 |
| DNA PACKAGING                                             | GO:0006323 | 90  | 0.08 | 0.85 | 6.71E-01 | 8.28E-01 |
| CHOLESTEROL METABOLIC PROCESS                             | GO:0008203 | 50  | 0.10 | 0.85 | 6.54E-01 | 8.26E-01 |
| NEUROTRANSMITTER SECRETION                                | GO:0007269 | 35  | 0.12 | 0.85 | 6.60E-01 | 8.33E-01 |
| SIGNAL RELEASE FROM SYNAPSE                               | GO:0099643 | 35  | 0.12 | 0.84 | 6.52E-01 | 8.40E-01 |
| RIBONUCLEOTIDE BIOSYNTHETIC PROCESS                       | GO:0009260 | 97  | 0.07 | 0.83 | 6.74E-01 | 8.51E-01 |
| NUCLEOSIDE PHOSPHATE BIOSYNTHETIC PROCESS                 | GO:1901293 | 136 | 0.06 | 0.83 | 6.74E-01 | 8.60E-01 |
| ALPHA-AMINO ACID CATABOLIC PROCESS                        | GO:1901606 | 35  | 0.12 | 0.82 | 6.96E-01 | 8.68E-01 |
| RHO PROTEIN SIGNAL TRANSDUCTION                           | GO:0007266 | 41  | 0.11 | 0.82 | 6.79E-01 | 8.65E-01 |
| POSITIVE REGULATION OF ACTIN FILAMENT BUNDLE ASSEMBLY     | GO:0032233 | 38  | 0.11 | 0.82 | 7.06E-01 | 8.67E-01 |
| NUCLEAR MEMBRANE ORGANIZATION                             | GO:0071763 | 31  | 0.13 | 0.81 | 6.91E-01 | 8.82E-01 |



|                                                                          |            |     |      |      |          |          |
|--------------------------------------------------------------------------|------------|-----|------|------|----------|----------|
| MITOTIC METAPHASE PLATE CONGRESSION                                      | GO:0007080 | 44  | 0.10 | 0.80 | 6.86E-01 | 8.78E-01 |
| SECONDARY ALCOHOL METABOLIC PROCESS                                      | GO:1902652 | 56  | 0.09 | 0.80 | 7.02E-01 | 8.86E-01 |
| REGULATION OF BODY FLUID LEVELS                                          | GO:0050878 | 143 | 0.06 | 0.80 | 7.38E-01 | 8.85E-01 |
| POSITIVE REGULATION OF STRESS FIBER ASSEMBLY                             | GO:0051496 | 34  | 0.11 | 0.79 | 7.46E-01 | 8.96E-01 |
| CANONICAL WNT SIGNALING PATHWAY                                          | GO:0060070 | 34  | 0.12 | 0.79 | 7.34E-01 | 8.93E-01 |
| RESPONSE TO TOXIC SUBSTANCE                                              | GO:0009636 | 52  | 0.09 | 0.79 | 7.23E-01 | 8.92E-01 |
| RIBOSE PHOSPHATE BIOSYNTHETIC PROCESS                                    | GO:0046390 | 103 | 0.07 | 0.78 | 7.37E-01 | 8.91E-01 |
| REGULATION OF NOTCH SIGNALING PATHWAY                                    | GO:0008593 | 54  | 0.09 | 0.78 | 7.54E-01 | 8.89E-01 |
| NUCLEAR ENVELOPE ORGANIZATION                                            | GO:0006998 | 39  | 0.10 | 0.78 | 7.66E-01 | 8.94E-01 |
| VITAMIN METABOLIC PROCESS                                                | GO:0006766 | 54  | 0.09 | 0.77 | 7.66E-01 | 9.01E-01 |
| GLYCOSYL COMPOUND METABOLIC PROCESS                                      | GO:1901657 | 49  | 0.09 | 0.77 | 7.66E-01 | 9.02E-01 |
| ENDOTHELIAL CELL MIGRATION                                               | GO:0043542 | 34  | 0.11 | 0.77 | 7.44E-01 | 9.02E-01 |
| PURINE-CONTAINING COMPOUND BIOSYNTHETIC PROCESS                          | GO:0072522 | 106 | 0.06 | 0.76 | 7.94E-01 | 9.11E-01 |
| NEURAL TUBE DEVELOPMENT                                                  | GO:0021915 | 32  | 0.11 | 0.76 | 7.60E-01 | 9.10E-01 |
| BIOLOGICAL PROCESS INVOLVED IN INTERACTION WITH SYMBIONT                 | GO:0051702 | 55  | 0.09 | 0.75 | 7.82E-01 | 9.11E-01 |
| CELLULAR IRON ION HOMEOSTASIS                                            | GO:0006879 | 39  | 0.10 | 0.75 | 7.68E-01 | 9.11E-01 |
| NEUROTRANSMITTER TRANSPORT                                               | GO:0006836 | 44  | 0.09 | 0.74 | 8.07E-01 | 9.24E-01 |
| NEGATIVE REGULATION OF STRESS-ACTIVATED MAPK CASCADE                     | GO:0032873 | 32  | 0.11 | 0.74 | 7.76E-01 | 9.20E-01 |
| CHROMATIN ASSEMBLY                                                       | GO:0031497 | 63  | 0.08 | 0.73 | 8.20E-01 | 9.26E-01 |
| DETOXIFICATION                                                           | GO:0098754 | 32  | 0.11 | 0.73 | 8.12E-01 | 9.28E-01 |
| REGULATION OF RELEASE OF CYTOCHROME C FROM MITOCHONDRIA                  | GO:0090199 | 37  | 0.10 | 0.73 | 8.37E-01 | 9.28E-01 |
| PROTEIN LOCALIZATION TO CELL JUNCTION                                    | GO:1902414 | 31  | 0.11 | 0.72 | 8.38E-01 | 9.28E-01 |
| NUCLEOTIDE BIOSYNTHETIC PROCESS                                          | GO:0009165 | 133 | 0.05 | 0.72 | 8.12E-01 | 9.25E-01 |
| NEGATIVE REGULATION OF STRESS-ACTIVATED PROTEIN KINASE SIGNALING CASCADE | GO:0070303 | 32  | 0.11 | 0.72 | 7.88E-01 | 9.22E-01 |
| LIPID CATABOLIC PROCESS                                                  | GO:0016042 | 132 | 0.05 | 0.72 | 8.37E-01 | 9.23E-01 |
| RNA PHOSPHODIESTER BOND HYDROLYSIS                                       | GO:0090501 | 61  | 0.08 | 0.71 | 8.00E-01 | 9.27E-01 |
| ORGANELLE DISASSEMBLY                                                    | GO:1903008 | 67  | 0.07 | 0.70 | 8.56E-01 | 9.44E-01 |
| REGULATION OF CILIUM ASSEMBLY                                            | GO:1902017 | 61  | 0.07 | 0.69 | 8.34E-01 | 9.46E-01 |
| POSITIVE REGULATION OF MONONUCLEAR CELL PROLIFERATION                    | GO:0032946 | 78  | 0.07 | 0.69 | 8.70E-01 | 9.47E-01 |
| POSITIVE REGULATION OF LYMPHOCYTE PROLIFERATION                          | GO:0050671 | 77  | 0.07 | 0.68 | 8.76E-01 | 9.52E-01 |
| GLYCOLIPID BIOSYNTHETIC PROCESS                                          | GO:0009247 | 45  | 0.09 | 0.67 | 8.56E-01 | 9.59E-01 |
| POSITIVE REGULATION OF IMMUNOGLOBULIN PRODUCTION                         | GO:0002639 | 31  | 0.10 | 0.67 | 8.75E-01 | 9.59E-01 |
| ACTION POTENTIAL                                                         | GO:0001508 | 31  | 0.10 | 0.67 | 8.84E-01 | 9.56E-01 |



|                                                                |            |     |       |       |          |          |
|----------------------------------------------------------------|------------|-----|-------|-------|----------|----------|
| METAPHASE PLATE CONGRESSION                                    | GO:0051310 | 48  | 0.08  | 0.66  | 9.09E-01 | 9.66E-01 |
| RESPONSE TO RETINOIC ACID                                      | GO:0032526 | 32  | 0.10  | 0.65  | 8.89E-01 | 9.71E-01 |
| ERYTHROCYTE HOMEOSTASIS                                        | GO:0034101 | 45  | 0.08  | 0.63  | 9.00E-01 | 9.87E-01 |
| NCRNA CATABOLIC PROCESS                                        | GO:0034661 | 30  | 0.10  | 0.63  | 9.12E-01 | 9.83E-01 |
| HEART PROCESS                                                  | GO:0003015 | 33  | 0.09  | 0.62  | 9.40E-01 | 9.87E-01 |
| POSITIVE REGULATION OF PROTEIN DEPHOSPHORYLATION               | GO:0035307 | 31  | 0.10  | 0.61  | 9.06E-01 | 9.94E-01 |
| POSITIVE REGULATION OF HORMONE SECRETION                       | GO:0046887 | 36  | 0.09  | 0.61  | 9.48E-01 | 9.93E-01 |
| COAGULATION                                                    | GO:0050817 | 81  | 0.05  | 0.58  | 9.75E-01 | 1.00E+00 |
| UNSATURATED FATTY ACID METABOLIC PROCESS                       | GO:0033559 | 59  | 0.06  | 0.58  | 9.64E-01 | 1.00E+00 |
| BLOOD COAGULATION                                              | GO:0007596 | 81  | 0.05  | 0.57  | 9.57E-01 | 1.00E+00 |
| LIPID HOMEOSTASIS                                              | GO:0055088 | 74  | 0.06  | 0.57  | 9.73E-01 | 1.00E+00 |
| DNA DAMAGE RESPONSE, SIGNAL TRANSDUCTION BY P53 CLASS MEDIATOR | GO:0030330 | 33  | 0.08  | 0.56  | 9.67E-01 | 1.00E+00 |
| FATTY ACID METABOLIC PROCESS                                   | GO:0006631 | 180 | 0.03  | 0.54  | 9.71E-01 | 1.00E+00 |
| PROTEIN N-LINKED GLYCOSYLATION                                 | GO:0006487 | 54  | 0.06  | 0.54  | 9.76E-01 | 1.00E+00 |
| HEMOSTASIS                                                     | GO:0007599 | 85  | 0.05  | 0.53  | 9.82E-01 | 1.00E+00 |
| POSITIVE REGULATION OF HEMOPOIESIS                             | GO:1903708 | 87  | 0.05  | 0.53  | 9.78E-01 | 1.00E+00 |
| APPENDAGE DEVELOPMENT                                          | GO:0048736 | 33  | 0.08  | 0.53  | 9.84E-01 | 1.00E+00 |
| LIMB DEVELOPMENT                                               | GO:0060173 | 33  | 0.08  | 0.52  | 9.84E-01 | 9.97E-01 |
| POSITIVE REGULATION OF LEUKOCYTE DIFFERENTIATION               | GO:1902107 | 87  | 0.05  | 0.52  | 9.83E-01 | 9.94E-01 |
| HISTONE H3 ACETYLATION                                         | GO:0043966 | 40  | 0.06  | 0.48  | 9.92E-01 | 1.00E+00 |
| ENSHEATHMENT OF NEURONS                                        | GO:0007272 | 39  | 0.05  | 0.42  | 1.00E+00 | 1.00E+00 |
| AXON ENSHEATHMENT                                              | GO:0008366 | 39  | 0.05  | 0.40  | 1.00E+00 | 1.00E+00 |
| REGULATION OF G PROTEIN-COUPLED RECEPTOR SIGNALING PATHWAY     | GO:0008277 | 62  | -0.04 | -0.41 | 1.00E+00 | 9.99E-01 |
| POSITIVE REGULATION OF T CELL PROLIFERATION                    | GO:0042102 | 57  | -0.05 | -0.43 | 1.00E+00 | 9.99E-01 |
| MYELINATION                                                    | GO:0042552 | 38  | -0.06 | -0.47 | 9.98E-01 | 9.96E-01 |
| REGULATION OF OXIDOREDUCTASE ACTIVITY                          | GO:0051341 | 48  | -0.06 | -0.48 | 9.96E-01 | 9.96E-01 |
| REGULATION OF GLUCOSE METABOLIC PROCESS                        | GO:0010906 | 54  | -0.06 | -0.50 | 9.87E-01 | 9.93E-01 |
| ACTIN FILAMENT BUNDLE ASSEMBLY                                 | GO:0051017 | 34  | -0.07 | -0.50 | 9.94E-01 | 9.94E-01 |
| DNA BIOSYNTHETIC PROCESS                                       | GO:0071897 | 48  | -0.06 | -0.53 | 9.82E-01 | 9.86E-01 |
| POSITIVE REGULATION OF ALPHA-BETA T CELL ACTIVATION            | GO:0046635 | 39  | -0.07 | -0.53 | 9.84E-01 | 9.86E-01 |
| REGULATION OF IMMUNOGLOBULIN PRODUCTION                        | GO:0002637 | 39  | -0.07 | -0.53 | 9.80E-01 | 9.87E-01 |
| NUCLEOSOME ASSEMBLY                                            | GO:0006334 | 45  | -0.07 | -0.53 | 9.77E-01 | 9.88E-01 |
| POSITIVE REGULATION OF INTRACELLULAR TRANSPORT                 | GO:0032388 | 149 | -0.04 | -0.54 | 9.84E-01 | 9.86E-01 |

|                                                                       |            |     |       |       |          |          |
|-----------------------------------------------------------------------|------------|-----|-------|-------|----------|----------|
| IRON ION HOMEOSTASIS                                                  | GO:0055072 | 46  | -0.07 | -0.55 | 9.73E-01 | 9.82E-01 |
| NEGATIVE REGULATION OF DNA METABOLIC PROCESS                          | GO:0051053 | 81  | -0.05 | -0.55 | 9.69E-01 | 9.80E-01 |
| REGULATION OF SYNAPTIC PLASTICITY                                     | GO:0048167 | 67  | -0.06 | -0.56 | 9.65E-01 | 9.77E-01 |
| T CELL DIFFERENTIATION                                                | GO:0030217 | 62  | -0.06 | -0.56 | 9.78E-01 | 9.77E-01 |
| REGULATION OF B CELL PROLIFERATION                                    | GO:0030888 | 39  | -0.08 | -0.56 | 9.71E-01 | 9.77E-01 |
| POSITIVE REGULATION OF LYMPHOCYTE DIFFERENTIATION                     | GO:0045621 | 59  | -0.06 | -0.57 | 9.51E-01 | 9.76E-01 |
| MULTICELLULAR ORGANISMAL SIGNALING                                    | GO:0035637 | 36  | -0.08 | -0.57 | 9.71E-01 | 9.77E-01 |
| POSITIVE REGULATION OF SYNAPTIC TRANSMISSION                          | GO:0050806 | 39  | -0.08 | -0.57 | 9.63E-01 | 9.76E-01 |
| NEGATIVE REGULATION OF RESPONSE TO DNA DAMAGE STIMULUS                | GO:2001021 | 62  | -0.06 | -0.57 | 9.57E-01 | 9.76E-01 |
| NEURAL NUCLEUS DEVELOPMENT                                            | GO:0048857 | 35  | -0.08 | -0.57 | 9.64E-01 | 9.75E-01 |
| REGULATION OF ALTERNATIVE MRNA SPLICING, VIA SPLICEOSOME              | GO:0000381 | 39  | -0.08 | -0.58 | 9.68E-01 | 9.74E-01 |
| SUBSTANTIA NIGRA DEVELOPMENT                                          | GO:0021762 | 35  | -0.08 | -0.59 | 9.50E-01 | 9.68E-01 |
| ARACHIDONIC ACID METABOLIC PROCESS                                    | GO:0019369 | 33  | -0.09 | -0.59 | 9.38E-01 | 9.65E-01 |
| ACTIN FILAMENT BUNDLE ORGANIZATION                                    | GO:0061572 | 36  | -0.08 | -0.60 | 9.50E-01 | 9.61E-01 |
| POSITIVE REGULATION OF LEUKOCYTE PROLIFERATION                        | GO:0070665 | 85  | -0.06 | -0.60 | 9.35E-01 | 9.61E-01 |
| AMEBOIDAL-TYPE CELL MIGRATION                                         | GO:0001667 | 68  | -0.06 | -0.61 | 9.43E-01 | 9.56E-01 |
| EXECUTION PHASE OF APOPTOSIS                                          | GO:0097194 | 30  | -0.09 | -0.62 | 9.49E-01 | 9.49E-01 |
| REGULATION OF PROTEIN DEPHOSPHORYLATION                               | GO:0035304 | 64  | -0.07 | -0.62 | 9.30E-01 | 9.47E-01 |
| POSITIVE REGULATION OF JNK CASCADE                                    | GO:0046330 | 59  | -0.07 | -0.62 | 9.42E-01 | 9.47E-01 |
| POSITIVE REGULATION OF LEUKOCYTE CELL-CELL ADHESION                   | GO:1903039 | 152 | -0.04 | -0.62 | 9.11E-01 | 9.48E-01 |
| ACYLGLYCEROL METABOLIC PROCESS                                        | GO:0006639 | 44  | -0.08 | -0.62 | 9.27E-01 | 9.45E-01 |
| PURINE-CONTAINING COMPOUND CATABOLIC PROCESS                          | GO:0072523 | 31  | -0.10 | -0.62 | 9.12E-01 | 9.45E-01 |
| NEUTRAL LIPID METABOLIC PROCESS                                       | GO:0006638 | 44  | -0.08 | -0.63 | 9.23E-01 | 9.45E-01 |
| NEGATIVE REGULATION OF MRNA METABOLIC PROCESS                         | GO:1903312 | 57  | -0.07 | -0.63 | 9.16E-01 | 9.42E-01 |
| CARTILAGE DEVELOPMENT                                                 | GO:0051216 | 31  | -0.10 | -0.64 | 9.18E-01 | 9.37E-01 |
| PRIMARY ALCOHOL METABOLIC PROCESS                                     | GO:0034308 | 30  | -0.10 | -0.64 | 9.15E-01 | 9.35E-01 |
| NEGATIVE REGULATION OF NEURON DEATH                                   | GO:1901215 | 63  | -0.07 | -0.64 | 8.98E-01 | 9.31E-01 |
| POSITIVE REGULATION OF CELL MORPHOGENESIS INVOLVED IN DIFFERENTIATION | GO:0010770 | 41  | -0.09 | -0.65 | 9.00E-01 | 9.30E-01 |
| REGULATION OF DNA BINDING                                             | GO:0051101 | 64  | -0.07 | -0.65 | 9.00E-01 | 9.31E-01 |
| REGULATION OF NUCLEAR DIVISION                                        | GO:0051783 | 73  | -0.07 | -0.65 | 9.01E-01 | 9.31E-01 |
| REGULATION OF MITOTIC NUCLEAR DIVISION                                | GO:0007088 | 70  | -0.07 | -0.65 | 9.01E-01 | 9.26E-01 |
| NEGATIVE REGULATION OF WNT SIGNALING PATHWAY                          | GO:0030178 | 85  | -0.06 | -0.66 | 9.04E-01 | 9.24E-01 |
| PHOSPHATIDYLCHOLINE METABOLIC PROCESS                                 | GO:0046470 | 37  | -0.09 | -0.66 | 9.02E-01 | 9.23E-01 |

|                                                              |            |     |       |       |          |          |
|--------------------------------------------------------------|------------|-----|-------|-------|----------|----------|
| NEGATIVE REGULATION OF CELL GROWTH                           | GO:0030308 | 97  | -0.06 | -0.66 | 8.87E-01 | 9.17E-01 |
| PROTEIN-DNA COMPLEX ASSEMBLY                                 | GO:0065004 | 81  | -0.06 | -0.66 | 8.94E-01 | 9.18E-01 |
| POSITIVE REGULATION OF INTRACELLULAR PROTEIN TRANSPORT       | GO:0090316 | 118 | -0.05 | -0.66 | 8.96E-01 | 9.16E-01 |
| PROTEIN-CONTAINING COMPLEX DISASSEMBLY                       | GO:0032984 | 100 | -0.06 | -0.67 | 8.82E-01 | 9.16E-01 |
| REGULATION OF CELLULAR CARBOHYDRATE METABOLIC PROCESS        | GO:0010675 | 70  | -0.07 | -0.67 | 8.54E-01 | 9.08E-01 |
| NEGATIVE REGULATION OF INTRINSIC APOPTOTIC SIGNALING PATHWAY | GO:2001243 | 68  | -0.07 | -0.68 | 8.62E-01 | 9.02E-01 |
| PROTEIN STABILIZATION                                        | GO:0050821 | 152 | -0.05 | -0.68 | 8.77E-01 | 9.01E-01 |
| CELLULAR GLUCOSE HOMEOSTASIS                                 | GO:0001678 | 38  | -0.09 | -0.68 | 8.75E-01 | 9.01E-01 |
| POSITIVE REGULATION OF DNA BIOSYNTHETIC PROCESS              | GO:2000573 | 52  | -0.08 | -0.68 | 8.53E-01 | 9.01E-01 |
| REGULATION OF GRANULOCYTE CHEMOTAXIS                         | GO:0071622 | 30  | -0.10 | -0.68 | 8.54E-01 | 9.01E-01 |
| PEROXISOME ORGANIZATION                                      | GO:0007031 | 30  | -0.11 | -0.69 | 8.48E-01 | 8.97E-01 |
| POSITIVE REGULATION OF T CELL ACTIVATION                     | GO:0050870 | 136 | -0.05 | -0.70 | 8.52E-01 | 8.86E-01 |
| POSITIVE REGULATION OF T CELL DIFFERENTIATION                | GO:0045582 | 50  | -0.08 | -0.70 | 8.55E-01 | 8.77E-01 |
| MODULATION OF CHEMICAL SYNAPTIC TRANSMISSION                 | GO:0050804 | 123 | -0.05 | -0.70 | 8.44E-01 | 8.77E-01 |
| RIBOSE PHOSPHATE METABOLIC PROCESS                           | GO:0019693 | 196 | -0.04 | -0.71 | 8.08E-01 | 8.73E-01 |
| REGULATION OF TRANS-SYNAPTIC SIGNALING                       | GO:0099177 | 124 | -0.05 | -0.71 | 8.49E-01 | 8.69E-01 |
| REGULATION OF DNA BIOSYNTHETIC PROCESS                       | GO:2000278 | 84  | -0.07 | -0.72 | 8.12E-01 | 8.59E-01 |
| LONG-CHAIN FATTY ACID METABOLIC PROCESS                      | GO:0001676 | 67  | -0.07 | -0.72 | 8.28E-01 | 8.58E-01 |
| REGULATION OF CELL ADHESION MEDIATED BY INTEGRIN             | GO:0033628 | 30  | -0.11 | -0.73 | 8.33E-01 | 8.52E-01 |
| SEX DIFFERENTIATION                                          | GO:0007548 | 37  | -0.10 | -0.73 | 7.98E-01 | 8.51E-01 |
| NEGATIVE REGULATION OF TELOMERE MAINTENANCE                  | GO:0032205 | 31  | -0.11 | -0.73 | 8.05E-01 | 8.47E-01 |
| REGULATION OF HISTONE ACETYLATION                            | GO:0035065 | 40  | -0.10 | -0.73 | 8.02E-01 | 8.48E-01 |
| MICROTUBULE BUNDLE FORMATION                                 | GO:0001578 | 40  | -0.10 | -0.73 | 7.81E-01 | 8.47E-01 |
| POSITIVE REGULATION OF ACTIN FILAMENT POLYMERIZATION         | GO:0030838 | 57  | -0.08 | -0.74 | 7.86E-01 | 8.35E-01 |
| ALPHA-BETA T CELL ACTIVATION                                 | GO:0046631 | 30  | -0.11 | -0.74 | 7.70E-01 | 8.33E-01 |
| GLYCOLIPID METABOLIC PROCESS                                 | GO:0006664 | 65  | -0.08 | -0.74 | 7.67E-01 | 8.32E-01 |
| TISSUE MIGRATION                                             | GO:0090130 | 45  | -0.09 | -0.75 | 7.72E-01 | 8.30E-01 |
| FATTY ACID BIOSYNTHETIC PROCESS                              | GO:0006633 | 61  | -0.08 | -0.75 | 7.74E-01 | 8.30E-01 |
| REGULATION OF COAGULATION                                    | GO:0050818 | 31  | -0.12 | -0.75 | 7.51E-01 | 8.30E-01 |
| CHEMICAL SYNAPTIC TRANSMISSION                               | GO:0007268 | 114 | -0.06 | -0.75 | 7.79E-01 | 8.30E-01 |
| CONNECTIVE TISSUE DEVELOPMENT                                | GO:0061448 | 51  | -0.09 | -0.75 | 7.91E-01 | 8.28E-01 |
| SIGNAL RELEASE                                               | GO:0023061 | 57  | -0.08 | -0.75 | 7.69E-01 | 8.23E-01 |
| CHROMOSOME LOCALIZATION                                      | GO:0050000 | 52  | -0.09 | -0.76 | 8.00E-01 | 8.22E-01 |

|                                                                  |            |     |       |       |          |          |
|------------------------------------------------------------------|------------|-----|-------|-------|----------|----------|
| REGULATION OF HORMONE SECRETION                                  | GO:0046883 | 81  | -0.07 | -0.76 | 7.85E-01 | 8.21E-01 |
| DNA DUPLEX UNWINDING                                             | GO:0032508 | 30  | -0.11 | -0.76 | 7.75E-01 | 8.21E-01 |
| EPITHELIAL CELL MIGRATION                                        | GO:0010631 | 44  | -0.10 | -0.76 | 7.86E-01 | 8.21E-01 |
| MEIOSIS I CELL CYCLE PROCESS                                     | GO:0061982 | 46  | -0.09 | -0.76 | 7.60E-01 | 8.19E-01 |
| ANTEROGRADE TRANS-SYNAPTIC SIGNALING                             | GO:0098916 | 114 | -0.06 | -0.76 | 7.57E-01 | 8.18E-01 |
| SYNAPTIC SIGNALING                                               | GO:0099536 | 130 | -0.06 | -0.76 | 7.72E-01 | 8.16E-01 |
| PROTEIN LOCALIZATION TO ENDOPLASMIC RETICULUM                    | GO:0070972 | 48  | -0.09 | -0.77 | 7.54E-01 | 8.12E-01 |
| ERYTHROCYTE DIFFERENTIATION                                      | GO:0030218 | 42  | -0.10 | -0.77 | 7.84E-01 | 8.12E-01 |
| EPITHELIUM MIGRATION                                             | GO:0090132 | 44  | -0.10 | -0.77 | 7.57E-01 | 8.11E-01 |
| CELLULAR PROTEIN COMPLEX DISASSEMBLY                             | GO:0043624 | 37  | -0.11 | -0.77 | 7.64E-01 | 8.08E-01 |
| CALCIUM ION TRANSPORT                                            | GO:0006816 | 94  | -0.07 | -0.77 | 7.48E-01 | 8.08E-01 |
| GLIAL CELL DIFFERENTIATION                                       | GO:0010001 | 52  | -0.09 | -0.77 | 7.39E-01 | 8.05E-01 |
| G2/M TRANSITION OF MITOTIC CELL CYCLE                            | GO:0000086 | 36  | -0.11 | -0.77 | 7.55E-01 | 8.05E-01 |
| MEIOSIS I                                                        | GO:0007127 | 44  | -0.10 | -0.77 | 7.50E-01 | 8.05E-01 |
| REGULATION OF TELOMERASE ACTIVITY                                | GO:0051972 | 43  | -0.10 | -0.78 | 7.41E-01 | 8.03E-01 |
| WATER-SOLUBLE VITAMIN METABOLIC PROCESS                          | GO:0006767 | 44  | -0.10 | -0.78 | 7.24E-01 | 7.95E-01 |
| MYELOID CELL HOMEOSTASIS                                         | GO:0002262 | 52  | -0.09 | -0.78 | 7.55E-01 | 7.92E-01 |
| DNA CONFORMATION CHANGE                                          | GO:0071103 | 133 | -0.06 | -0.78 | 7.29E-01 | 7.92E-01 |
| CELL CYCLE G2/M PHASE TRANSITION                                 | GO:0044839 | 38  | -0.11 | -0.79 | 7.32E-01 | 7.86E-01 |
| LIPOSACCHARIDE METABOLIC PROCESS                                 | GO:1903509 | 66  | -0.08 | -0.79 | 7.50E-01 | 7.81E-01 |
| REGULATION OF PEPTIDYL-THREONINE PHOSPHORYLATION                 | GO:0010799 | 31  | -0.12 | -0.79 | 7.28E-01 | 7.80E-01 |
| NEGATIVE REGULATION OF CHEMOTAXIS                                | GO:0050922 | 30  | -0.12 | -0.80 | 7.32E-01 | 7.77E-01 |
| SYNAPSE ORGANIZATION                                             | GO:0050808 | 89  | -0.07 | -0.80 | 7.25E-01 | 7.77E-01 |
| REGULATION OF DNA-DEPENDENT DNA REPLICATION                      | GO:0090329 | 36  | -0.11 | -0.80 | 7.03E-01 | 7.70E-01 |
| ANTEROGRADE AXONAL TRANSPORT                                     | GO:0008089 | 30  | -0.12 | -0.80 | 7.10E-01 | 7.65E-01 |
| REGULATION OF HEMOSTASIS                                         | GO:1900046 | 30  | -0.12 | -0.81 | 7.24E-01 | 7.61E-01 |
| LYSOSOME LOCALIZATION                                            | GO:0032418 | 34  | -0.11 | -0.81 | 6.91E-01 | 7.61E-01 |
| ANTIGEN PROCESSING AND PRESENTATION OF EXOGENOUS PEPTIDE ANTIGEN | GO:0002478 | 31  | -0.12 | -0.81 | 7.04E-01 | 7.61E-01 |
| ANTIGEN PROCESSING AND PRESENTATION OF PEPTIDE ANTIGEN           | GO:0048002 | 51  | -0.09 | -0.81 | 7.13E-01 | 7.61E-01 |
| NEGATIVE REGULATION OF CANONICAL WNT SIGNALING PATHWAY           | GO:0090090 | 69  | -0.08 | -0.81 | 6.97E-01 | 7.60E-01 |
| REGULATION OF LIPID LOCALIZATION                                 | GO:1905952 | 77  | -0.08 | -0.81 | 6.71E-01 | 7.57E-01 |
| REGULATION OF HEART RATE                                         | GO:0002027 | 33  | -0.12 | -0.81 | 7.36E-01 | 7.57E-01 |
| POSITIVE REGULATION OF PROTEIN TRANSPORT                         | GO:0051222 | 181 | -0.05 | -0.81 | 6.95E-01 | 7.57E-01 |

|                                                              |            |     |       |       |          |          |
|--------------------------------------------------------------|------------|-----|-------|-------|----------|----------|
| REGULATION OF BLOOD COAGULATION                              | GO:0030193 | 30  | -0.12 | -0.81 | 7.11E-01 | 7.57E-01 |
| CHOLESTEROL HOMEOSTASIS                                      | GO:0042632 | 40  | -0.11 | -0.82 | 6.65E-01 | 7.53E-01 |
| REGULATION OF REPRODUCTIVE PROCESS                           | GO:2000241 | 36  | -0.11 | -0.82 | 6.92E-01 | 7.52E-01 |
| LEUKOCYTE CELL-CELL ADHESION                                 | GO:0007159 | 39  | -0.11 | -0.82 | 7.02E-01 | 7.52E-01 |
| POSITIVE REGULATION OF ESTABLISHMENT OF PROTEIN LOCALIZATION | GO:1904951 | 197 | -0.05 | -0.82 | 7.08E-01 | 7.52E-01 |
| PURINE NUCLEOTIDE METABOLIC PROCESS                          | GO:0006163 | 193 | -0.05 | -0.82 | 6.88E-01 | 7.51E-01 |
| NUCLEOTIDE-EXCISION REPAIR                                   | GO:0006289 | 48  | -0.10 | -0.82 | 6.78E-01 | 7.49E-01 |
| PROCESS                                                      | GO:0031146 | 37  | -0.11 | -0.82 | 6.87E-01 | 7.49E-01 |
| REGULATION OF LEUKOCYTE APOPTOTIC PROCESS                    | GO:2000106 | 45  | -0.10 | -0.82 | 6.71E-01 | 7.45E-01 |
| REGULATION OF ACTIN FILAMENT BUNDLE ASSEMBLY                 | GO:0032231 | 61  | -0.09 | -0.83 | 6.80E-01 | 7.33E-01 |
| POSITIVE REGULATION OF CELL-CELL ADHESION                    | GO:0022409 | 172 | -0.05 | -0.83 | 6.48E-01 | 7.31E-01 |
| CELL-CELL JUNCTION ORGANIZATION                              | GO:0045216 | 72  | -0.08 | -0.84 | 6.65E-01 | 7.28E-01 |
| MODULATION BY HOST OF SYMBIONT PROCESS                       | GO:0051851 | 45  | -0.11 | -0.84 | 6.46E-01 | 7.22E-01 |
| TRANS-SYNAPTIC SIGNALING                                     | GO:0099537 | 117 | -0.07 | -0.84 | 6.87E-01 | 7.20E-01 |
| NEGATIVE REGULATION OF RESPONSE TO WOUNDING                  | GO:1903035 | 39  | -0.11 | -0.84 | 6.42E-01 | 7.18E-01 |
| MUSCLE CELL DIFFERENTIATION                                  | GO:0042692 | 68  | -0.09 | -0.85 | 6.35E-01 | 7.14E-01 |
| RESPONSE TO LIGHT STIMULUS                                   | GO:0009416 | 156 | -0.06 | -0.85 | 6.60E-01 | 7.12E-01 |
| TUBE FORMATION                                               | GO:0035148 | 39  | -0.12 | -0.85 | 6.78E-01 | 7.10E-01 |
| REGULATION OF TORC1 SIGNALING                                | GO:1903432 | 33  | -0.12 | -0.85 | 6.21E-01 | 7.06E-01 |
| REGULATION OF STRESS FIBER ASSEMBLY                          | GO:0051492 | 57  | -0.09 | -0.85 | 6.27E-01 | 7.05E-01 |
| REGULATION OF RHO PROTEIN SIGNAL TRANSDUCTION                | GO:0035023 | 52  | -0.10 | -0.85 | 6.43E-01 | 7.04E-01 |
| POSITIVE REGULATION OF PROTEIN POLYMERIZATION                | GO:0032273 | 84  | -0.08 | -0.85 | 6.50E-01 | 7.03E-01 |
| REGULATION OF INTRACELLULAR PROTEIN TRANSPORT                | GO:0033157 | 156 | -0.06 | -0.86 | 6.40E-01 | 6.99E-01 |
| REGULATION OF MUSCLE CELL DIFFERENTIATION                    | GO:0051147 | 47  | -0.11 | -0.86 | 6.24E-01 | 7.00E-01 |
| REGULATION OF MUSCLE CONTRACTION                             | GO:0006937 | 63  | -0.09 | -0.86 | 6.31E-01 | 6.98E-01 |
| DNA REPLICATION                                              | GO:0006260 | 126 | -0.07 | -0.86 | 6.22E-01 | 6.98E-01 |
| POSITIVE REGULATION OF CALCIUM ION TRANSPORT                 | GO:0051928 | 47  | -0.10 | -0.86 | 6.44E-01 | 6.98E-01 |
| NEGATIVE REGULATION OF CHROMOSOME ORGANIZATION               | GO:2001251 | 56  | -0.10 | -0.86 | 6.19E-01 | 6.92E-01 |
| POSITIVE REGULATION OF DEPHOSPHORYLATION                     | GO:0035306 | 37  | -0.12 | -0.87 | 6.28E-01 | 6.90E-01 |
| RNA 3'-END PROCESSING                                        | GO:0031123 | 77  | -0.08 | -0.87 | 6.25E-01 | 6.90E-01 |
| RIBONUCLEOTIDE METABOLIC PROCESS                             | GO:0009259 | 188 | -0.05 | -0.87 | 6.05E-01 | 6.88E-01 |
| CELLULAR PIGMENTATION                                        | GO:0033059 | 34  | -0.13 | -0.87 | 5.70E-01 | 6.83E-01 |
| ACTIN FILAMENT ORGANIZATION                                  | GO:0007015 | 163 | -0.06 | -0.87 | 5.98E-01 | 6.80E-01 |

|                                                                                  |            |     |       |       |          |          |
|----------------------------------------------------------------------------------|------------|-----|-------|-------|----------|----------|
| POSITIVE REGULATION OF PROTEIN SECRETION                                         | GO:0050714 | 57  | -0.10 | -0.87 | 6.27E-01 | 6.80E-01 |
| PROTEIN IMPORT                                                                   | GO:0017038 | 105 | -0.07 | -0.87 | 5.96E-01 | 6.80E-01 |
| REPLICATION FORK PROCESSING                                                      | GO:0031297 | 32  | -0.13 | -0.88 | 6.30E-01 | 6.78E-01 |
| STEROL HOMEOSTASIS                                                               | GO:0055092 | 41  | -0.11 | -0.88 | 6.23E-01 | 6.78E-01 |
| CARBOXYLIC ACID BIOSYNTHETIC PROCESS                                             | GO:0046394 | 133 | -0.07 | -0.88 | 5.96E-01 | 6.72E-01 |
| PURINE NUCLEOTIDE BIOSYNTHETIC PROCESS                                           | GO:0006164 | 99  | -0.08 | -0.88 | 5.93E-01 | 6.73E-01 |
| ORGANIC ACID BIOSYNTHETIC PROCESS                                                | GO:0016053 | 133 | -0.07 | -0.88 | 5.93E-01 | 6.68E-01 |
| ALPHA-AMINO ACID BIOSYNTHETIC PROCESS                                            | GO:1901607 | 36  | -0.12 | -0.88 | 5.98E-01 | 6.68E-01 |
| REGULATION OF ANIMAL ORGAN MORPHOGENESIS                                         | GO:2000027 | 40  | -0.12 | -0.88 | 5.95E-01 | 6.68E-01 |
| CELLULAR RESPONSE TO ACID CHEMICAL                                               | GO:0071229 | 33  | -0.13 | -0.89 | 6.14E-01 | 6.66E-01 |
| ESTABLISHMENT OF CHROMOSOME LOCALIZATION                                         | GO:0051303 | 50  | -0.10 | -0.89 | 5.95E-01 | 6.67E-01 |
| REGULATION OF INTERLEUKIN-2 PRODUCTION                                           | GO:0032663 | 44  | -0.11 | -0.89 | 5.66E-01 | 6.61E-01 |
| POSITIVE REGULATION OF CELLULAR PROTEIN LOCALIZATION                             | GO:1903829 | 191 | -0.06 | -0.89 | 5.87E-01 | 6.61E-01 |
| PROTEIN PROCESSING                                                               | GO:0016485 | 101 | -0.08 | -0.90 | 5.75E-01 | 6.52E-01 |
| REGULATED EXOCYTOSIS                                                             | GO:0045055 | 60  | -0.10 | -0.90 | 5.86E-01 | 6.49E-01 |
| REGULATION OF LAMELLIPODIUM ORGANIZATION                                         | GO:1902743 | 38  | -0.12 | -0.90 | 5.78E-01 | 6.48E-01 |
| SUBSTRATE ADHESION-DEPENDENT CELL SPREADING                                      | GO:0034446 | 30  | -0.14 | -0.90 | 5.71E-01 | 6.49E-01 |
| ANTIGEN PROCESSING AND PRESENTATION OF EXOGENOUS ANTIGEN                         | GO:0019884 | 36  | -0.13 | -0.90 | 5.57E-01 | 6.48E-01 |
| RETROGRADE VESICLE-MEDIATED TRANSPORT, GOLGI TO ENDOPLASMIC RETICULUM            | GO:0006890 | 43  | -0.12 | -0.90 | 5.70E-01 | 6.48E-01 |
| REGULATION OF MICROTUBULE POLYMERIZATION                                         | GO:0031113 | 38  | -0.12 | -0.90 | 5.71E-01 | 6.44E-01 |
| REGULATION OF CARBOHYDRATE BIOSYNTHETIC PROCESS                                  | GO:0043255 | 48  | -0.11 | -0.90 | 5.60E-01 | 6.44E-01 |
| CELLULAR TRANSITION METAL ION HOMEOSTASIS                                        | GO:0046916 | 66  | -0.09 | -0.90 | 5.78E-01 | 6.43E-01 |
| REGULATION OF TELOMERE MAINTENANCE VIA TELOMERASE                                | GO:0032210 | 48  | -0.11 | -0.90 | 5.54E-01 | 6.44E-01 |
| POSITIVE REGULATION OF CYTOSKELETON ORGANIZATION                                 | GO:0051495 | 135 | -0.07 | -0.90 | 5.65E-01 | 6.44E-01 |
| REGULATION OF EPITHELIAL CELL APOPTOTIC PROCESS                                  | GO:1904035 | 38  | -0.12 | -0.91 | 5.62E-01 | 6.43E-01 |
| PURINE RIBONUCLEOTIDE METABOLIC PROCESS                                          | GO:0009150 | 180 | -0.06 | -0.91 | 5.83E-01 | 6.43E-01 |
| NEGATIVE REGULATION OF I-KAPPA B KINASE/NF-KAPPA B SIGNALING                     | GO:0043124 | 35  | -0.13 | -0.91 | 5.33E-01 | 6.42E-01 |
| REGULATION OF MITOTIC SISTER CHROMATID SEGREGATION                               | GO:0033047 | 36  | -0.13 | -0.91 | 5.88E-01 | 6.40E-01 |
| REGULATION OF REACTIVE OXYGEN SPECIES METABOLIC PROCESS                          | GO:2000377 | 79  | -0.09 | -0.91 | 5.40E-01 | 6.40E-01 |
| CHROMATIN REMODELING                                                             | GO:0006338 | 136 | -0.07 | -0.91 | 5.43E-01 | 6.38E-01 |
| POSITIVE REGULATION OF SUPRAMOLECULAR FIBER ORGANIZATION                         | GO:1902905 | 124 | -0.07 | -0.91 | 5.30E-01 | 6.36E-01 |
| ACTIVATION OF CYSTEINE-TYPE ENDOPEPTIDASE ACTIVITY INVOLVED IN APOPTOTIC PROCESS | GO:0006919 | 59  | -0.10 | -0.91 | 5.48E-01 | 6.34E-01 |

|                                                                              |            |     |       |       |          |          |
|------------------------------------------------------------------------------|------------|-----|-------|-------|----------|----------|
| CARBOHYDRATE DERIVATIVE TRANSPORT                                            | GO:1901264 | 46  | -0.12 | -0.91 | 5.52E-01 | 6.34E-01 |
| GLYCOSPHINGOLIPID METABOLIC PROCESS                                          | GO:0006687 | 32  | -0.14 | -0.92 | 5.59E-01 | 6.32E-01 |
| POSITIVE REGULATION OF LIPID TRANSPORT                                       | GO:0032370 | 35  | -0.13 | -0.92 | 5.88E-01 | 6.30E-01 |
| REGULATION OF MYELOID LEUKOCYTE DIFFERENTIATION                              | GO:0002761 | 57  | -0.10 | -0.92 | 5.68E-01 | 6.29E-01 |
| REGULATION OF MUSCLE SYSTEM PROCESS                                          | GO:0090257 | 85  | -0.09 | -0.92 | 5.31E-01 | 6.27E-01 |
| POSITIVE REGULATION OF CELL CYCLE G1/S PHASE TRANSITION                      | GO:1902808 | 32  | -0.14 | -0.92 | 5.46E-01 | 6.24E-01 |
| NEGATIVE REGULATION OF G2/M TRANSITION OF MITOTIC CELL CYCLE                 | GO:0010972 | 46  | -0.12 | -0.92 | 5.38E-01 | 6.24E-01 |
| CELLULAR RESPONSE TO UV                                                      | GO:0034644 | 70  | -0.09 | -0.92 | 5.36E-01 | 6.24E-01 |
| RESPONSE TO KETONE                                                           | GO:1901654 | 39  | -0.13 | -0.92 | 5.44E-01 | 6.25E-01 |
| MONOCARBOXYLIC ACID TRANSPORT                                                | GO:0015718 | 30  | -0.14 | -0.93 | 5.24E-01 | 6.21E-01 |
| REGULATION OF LEUKOCYTE DIFFERENTIATION                                      | GO:1902105 | 150 | -0.06 | -0.93 | 5.10E-01 | 6.16E-01 |
| REGULATION OF CALCIUM-MEDIATED SIGNALING                                     | GO:0050848 | 37  | -0.13 | -0.93 | 5.46E-01 | 6.15E-01 |
| REGULATION OF ACTIN FILAMENT POLYMERIZATION                                  | GO:0030833 | 107 | -0.08 | -0.93 | 5.44E-01 | 6.12E-01 |
| HORMONE METABOLIC PROCESS                                                    | GO:0042445 | 49  | -0.11 | -0.93 | 5.08E-01 | 6.09E-01 |
| SULFUR COMPOUND METABOLIC PROCESS                                            | GO:0006790 | 198 | -0.06 | -0.93 | 5.04E-01 | 6.08E-01 |
| REGULATION OF HORMONE LEVELS                                                 | GO:0010817 | 161 | -0.06 | -0.94 | 5.31E-01 | 6.03E-01 |
| RESPONSE TO REACTIVE OXYGEN SPECIES                                          | GO:0000302 | 86  | -0.09 | -0.94 | 5.10E-01 | 5.98E-01 |
| POSITIVE REGULATION OF PROTEIN KINASE B SIGNALING                            | GO:0051897 | 62  | -0.10 | -0.94 | 5.11E-01 | 5.97E-01 |
| NEGATIVE REGULATION OF TUMOR NECROSIS FACTOR SUPERFAMILY CYTOKINE PRODUCTION | GO:1903556 | 35  | -0.14 | -0.94 | 5.17E-01 | 5.95E-01 |
| INTRINSIC APOPTOTIC SIGNALING PATHWAY IN RESPONSE TO DNA DAMAGE              | GO:0008630 | 47  | -0.12 | -0.95 | 4.93E-01 | 5.94E-01 |
| POSITIVE REGULATION OF PROTEIN LOCALIZATION TO MEMBRANE                      | GO:1905477 | 67  | -0.10 | -0.95 | 5.07E-01 | 5.94E-01 |
| POSITIVE REGULATION OF CELL GROWTH                                           | GO:0030307 | 74  | -0.09 | -0.95 | 5.19E-01 | 5.91E-01 |
| 'DE NOVO' POSTTRANSLATIONAL PROTEIN FOLDING                                  | GO:0051084 | 31  | -0.14 | -0.95 | 4.76E-01 | 5.91E-01 |
| REGULATION OF TELOMERE MAINTENANCE VIA TELOMERE LENGTHENING                  | GO:1904356 | 54  | -0.11 | -0.95 | 5.08E-01 | 5.91E-01 |
| REGULATION OF CELL CYCLE G2/M PHASE TRANSITION                               | GO:1902749 | 67  | -0.10 | -0.95 | 5.21E-01 | 5.88E-01 |
| DETECTION OF STIMULUS                                                        | GO:0051606 | 70  | -0.10 | -0.95 | 5.34E-01 | 5.87E-01 |
| NEGATIVE REGULATION OF PROTEIN TRANSPORT                                     | GO:0051224 | 59  | -0.10 | -0.95 | 4.80E-01 | 5.86E-01 |
| NEGATIVE REGULATION OF DEPHOSPHORYLATION                                     | GO:0035305 | 31  | -0.15 | -0.95 | 4.94E-01 | 5.84E-01 |
| NEGATIVE REGULATION OF DEVELOPMENTAL GROWTH                                  | GO:0048640 | 33  | -0.14 | -0.95 | 4.90E-01 | 5.85E-01 |
| LIPOPROTEIN BIOSYNTHETIC PROCESS                                             | GO:0042158 | 70  | -0.10 | -0.96 | 4.89E-01 | 5.80E-01 |
| NEGATIVE REGULATION OF CELL CYCLE G2/M PHASE TRANSITION                      | GO:1902750 | 48  | -0.12 | -0.96 | 5.01E-01 | 5.78E-01 |
| REGULATION OF ACTOMYOSIN STRUCTURE ORGANIZATION                              | GO:0110020 | 59  | -0.11 | -0.96 | 5.00E-01 | 5.76E-01 |



|                                                                    |            |     |       |       |          |          |
|--------------------------------------------------------------------|------------|-----|-------|-------|----------|----------|
| NEGATIVE REGULATION OF APOPTOTIC SIGNALING PATHWAY                 | GO:2001234 | 126 | -0.07 | -0.96 | 4.80E-01 | 5.75E-01 |
| REGULATION OF INTERLEUKIN-12 PRODUCTION                            | GO:0032655 | 44  | -0.12 | -0.96 | 4.62E-01 | 5.74E-01 |
| REGULATION OF MITOTIC SPINDLE ORGANIZATION                         | GO:0060236 | 31  | -0.15 | -0.97 | 4.88E-01 | 5.67E-01 |
| IMMUNE RESPONSE-ACTIVATING SIGNAL TRANSDUCTION                     | GO:0002757 | 189 | -0.06 | -0.97 | 4.75E-01 | 5.66E-01 |
| NEGATIVE REGULATION OF ESTABLISHMENT OF PROTEIN LOCALIZATION       | GO:1904950 | 63  | -0.10 | -0.97 | 4.76E-01 | 5.63E-01 |
| PROTEIN LIPIDATION                                                 | GO:0006497 | 70  | -0.10 | -0.97 | 4.68E-01 | 5.61E-01 |
| POSITIVE REGULATION OF ENDOTHELIAL CELL PROLIFERATION              | GO:0001938 | 44  | -0.13 | -0.97 | 4.94E-01 | 5.61E-01 |
| RESPONSE TO AMINO ACID                                             | GO:0043200 | 31  | -0.14 | -0.97 | 4.66E-01 | 5.61E-01 |
| ACTIN FILAMENT-BASED MOVEMENT                                      | GO:0030048 | 42  | -0.12 | -0.97 | 4.53E-01 | 5.61E-01 |
| CORTICAL CYTOSKELETON ORGANIZATION                                 | GO:0030865 | 38  | -0.14 | -0.97 | 4.87E-01 | 5.60E-01 |
| MITOCHONDRION DISASSEMBLY                                          | GO:0061726 | 38  | -0.13 | -0.97 | 4.74E-01 | 5.60E-01 |
| REGULATION OF NIK/NF-KAPPAB SIGNALING                              | GO:1901222 | 67  | -0.10 | -0.98 | 4.57E-01 | 5.58E-01 |
| AUTOPHAGY OF MITOCHONDRION                                         | GO:0000422 | 38  | -0.13 | -0.98 | 4.59E-01 | 5.55E-01 |
| STEM CELL DIFFERENTIATION                                          | GO:0048863 | 56  | -0.11 | -0.98 | 4.49E-01 | 5.53E-01 |
| MONOCARBOXYLIC ACID BIOSYNTHETIC PROCESS                           | GO:0072330 | 80  | -0.09 | -0.99 | 4.54E-01 | 5.44E-01 |
| REGULATION OF TELOMERE MAINTENANCE                                 | GO:0032204 | 72  | -0.10 | -0.99 | 4.58E-01 | 5.42E-01 |
| POSITIVE REGULATION OF ENDOTHELIAL CELL MIGRATION                  | GO:0010595 | 72  | -0.10 | -0.99 | 4.55E-01 | 5.42E-01 |
| OSSIFICATION                                                       | GO:0001503 | 87  | -0.09 | -0.99 | 4.29E-01 | 5.41E-01 |
| PROTEIN LOCALIZATION TO PLASMA MEMBRANE                            | GO:0072659 | 128 | -0.07 | -0.99 | 4.39E-01 | 5.41E-01 |
| REGULATION OF LIPID STORAGE                                        | GO:0010883 | 36  | -0.14 | -0.99 | 4.61E-01 | 5.41E-01 |
| REGULATION OF SUBSTRATE ADHESION-DEPENDENT CELL SPREADING          | GO:1900024 | 39  | -0.13 | -0.99 | 4.56E-01 | 5.41E-01 |
| POSITIVE REGULATION OF STRESS-ACTIVATED MAPK CASCADE               | GO:0032874 | 78  | -0.10 | -0.99 | 4.56E-01 | 5.41E-01 |
| MUSCLE SYSTEM PROCESS                                              | GO:0003012 | 90  | -0.09 | -0.99 | 4.45E-01 | 5.35E-01 |
| MIDBRAIN DEVELOPMENT                                               | GO:0030901 | 45  | -0.13 | -0.99 | 4.46E-01 | 5.36E-01 |
| NEGATIVE REGULATION OF WOUND HEALING                               | GO:0061045 | 30  | -0.15 | -0.99 | 4.20E-01 | 5.36E-01 |
| NEGATIVE REGULATION OF ENDOCYTOSIS                                 | GO:0045806 | 34  | -0.14 | -0.99 | 4.34E-01 | 5.35E-01 |
| REGULATION OF CARBOHYDRATE METABOLIC PROCESS                       | GO:0006109 | 93  | -0.09 | -1.00 | 4.47E-01 | 5.32E-01 |
| MALE GAMETE GENERATION                                             | GO:0048232 | 125 | -0.08 | -1.00 | 4.29E-01 | 5.32E-01 |
| GO ID NOT FOUND IN OBO FILE ONTOLOGY DEFINITIONS                   | GO:0042493 | 37  | -0.14 | -1.00 | 4.31E-01 | 5.28E-01 |
| IMMUNE RESPONSE-ACTIVATING CELL SURFACE RECEPTOR SIGNALING PATHWAY | GO:0002429 | 189 | -0.06 | -1.00 | 4.25E-01 | 5.28E-01 |
| CELLULAR RESPONSE TO LIGHT STIMULUS                                | GO:0071482 | 72  | -0.10 | -1.00 | 4.14E-01 | 5.27E-01 |
| NEGATIVE REGULATION OF TUMOR NECROSIS FACTOR PRODUCTION            | GO:0032720 | 33  | -0.15 | -1.00 | 4.73E-01 | 5.27E-01 |
| PEPTIDYL-CYSTEINE MODIFICATION                                     | GO:0018198 | 30  | -0.15 | -1.01 | 4.18E-01 | 5.23E-01 |

|                                                                |            |     |       |       |          |          |
|----------------------------------------------------------------|------------|-----|-------|-------|----------|----------|
| 'DE NOVO' PROTEIN FOLDING                                      | GO:0006458 | 35  | -0.14 | -1.01 | 4.31E-01 | 5.22E-01 |
| STRIATED MUSCLE CELL DIFFERENTIATION                           | GO:0051146 | 48  | -0.12 | -1.01 | 4.40E-01 | 5.21E-01 |
| PROTEOGLYCAN METABOLIC PROCESS                                 | GO:0006029 | 41  | -0.13 | -1.01 | 4.37E-01 | 5.22E-01 |
| SPERMATID DEVELOPMENT                                          | GO:0007286 | 37  | -0.14 | -1.01 | 4.47E-01 | 5.22E-01 |
| NEGATIVE REGULATION OF GROWTH                                  | GO:0045926 | 117 | -0.08 | -1.01 | 4.21E-01 | 5.19E-01 |
| STRIATED MUSCLE CONTRACTION                                    | GO:0006941 | 35  | -0.14 | -1.01 | 4.28E-01 | 5.18E-01 |
| GLIAL CELL DEVELOPMENT                                         | GO:0021782 | 41  | -0.13 | -1.01 | 4.40E-01 | 5.18E-01 |
| REGULATION OF PEPTIDYL-LYSINE ACETYLATION                      | GO:2000756 | 44  | -0.12 | -1.01 | 4.21E-01 | 5.18E-01 |
| SPERMATOGENESIS                                                | GO:0007283 | 121 | -0.08 | -1.01 | 4.11E-01 | 5.18E-01 |
| MORPHOGENESIS OF AN EPITHELIUM                                 | GO:0002009 | 114 | -0.08 | -1.01 | 4.23E-01 | 5.16E-01 |
| REGULATION OF T CELL ACTIVATION                                | GO:0050863 | 200 | -0.06 | -1.02 | 4.03E-01 | 5.11E-01 |
| POSITIVE REGULATION OF LIPID LOCALIZATION                      | GO:1905954 | 50  | -0.12 | -1.02 | 4.21E-01 | 5.11E-01 |
| REGULATION OF AXON EXTENSION                                   | GO:0030516 | 40  | -0.13 | -1.02 | 4.00E-01 | 5.10E-01 |
| REGULATION OF PROTEIN KINASE B SIGNALING                       | GO:0051896 | 90  | -0.09 | -1.02 | 4.07E-01 | 5.10E-01 |
| MUSCLE CELL DEVELOPMENT                                        | GO:0055001 | 41  | -0.14 | -1.02 | 4.16E-01 | 5.09E-01 |
| REGULATION OF MRNA SPLICING, VIA SPLICEOSOME                   | GO:0048024 | 71  | -0.10 | -1.02 | 4.08E-01 | 5.09E-01 |
| SKIN DEVELOPMENT                                               | GO:0043588 | 44  | -0.13 | -1.02 | 4.13E-01 | 5.07E-01 |
| PROTEIN HOMOTETRAMERIZATION                                    | GO:0051289 | 35  | -0.15 | -1.03 | 4.08E-01 | 4.93E-01 |
| MUSCLE CONTRACTION                                             | GO:0006936 | 75  | -0.10 | -1.03 | 4.05E-01 | 4.91E-01 |
| SYNAPTIC VESICLE CYCLE                                         | GO:0099504 | 47  | -0.13 | -1.03 | 3.70E-01 | 4.92E-01 |
| REGULATION OF G2/M TRANSITION OF MITOTIC CELL CYCLE            | GO:0010389 | 63  | -0.11 | -1.03 | 4.15E-01 | 4.91E-01 |
| EPITHELIAL TUBE MORPHOGENESIS                                  | GO:0060562 | 76  | -0.10 | -1.03 | 4.01E-01 | 4.91E-01 |
| REGULATION OF T CELL DIFFERENTIATION                           | GO:0045580 | 81  | -0.10 | -1.03 | 3.77E-01 | 4.91E-01 |
| POSITIVE REGULATION OF BLOOD VESSEL ENDOTHELIAL CELL MIGRATION | GO:0043536 | 38  | -0.14 | -1.04 | 3.88E-01 | 4.86E-01 |
| REGULATION OF SIGNAL TRANSDUCTION BY P53 CLASS MEDIATOR        | GO:1901796 | 70  | -0.11 | -1.04 | 3.93E-01 | 4.84E-01 |
| CELLULAR AMINO ACID BIOSYNTHETIC PROCESS                       | GO:0008652 | 40  | -0.14 | -1.04 | 3.68E-01 | 4.83E-01 |
| ENDOCYTIC RECYCLING                                            | GO:0032456 | 52  | -0.12 | -1.04 | 3.95E-01 | 4.83E-01 |
| CELLULAR RESPONSE TO TUMOR NECROSIS FACTOR                     | GO:0071356 | 78  | -0.10 | -1.04 | 3.74E-01 | 4.78E-01 |
| NUCLEAR EXPORT                                                 | GO:0051168 | 97  | -0.09 | -1.05 | 3.80E-01 | 4.76E-01 |
| REGULATION OF PROTEIN LOCALIZATION TO NUCLEUS                  | GO:1900180 | 77  | -0.10 | -1.05 | 4.03E-01 | 4.75E-01 |
| MEMBRANE PROTEIN PROTEOLYSIS                                   | GO:0033619 | 30  | -0.16 | -1.05 | 3.89E-01 | 4.74E-01 |
| POSITIVE REGULATION OF PEPTIDYL-SERINE PHOSPHORYLATION         | GO:0033138 | 54  | -0.12 | -1.05 | 3.77E-01 | 4.73E-01 |
| SIGNAL TRANSDUCTION BY P53 CLASS MEDIATOR                      | GO:0072331 | 59  | -0.12 | -1.05 | 3.88E-01 | 4.72E-01 |

|                                                                           |            |     |       |       |          |          |
|---------------------------------------------------------------------------|------------|-----|-------|-------|----------|----------|
| VESICLE-MEDIATED TRANSPORT IN SYNAPSE                                     | GO:0099003 | 47  | -0.13 | -1.05 | 3.76E-01 | 4.72E-01 |
| RNA LOCALIZATION                                                          | GO:0006403 | 103 | -0.09 | -1.05 | 4.20E-01 | 4.72E-01 |
| REGULATION OF PRI-MIRNA TRANSCRIPTION BY RNA POLYMERASE II                | GO:1902893 | 32  | -0.16 | -1.05 | 3.68E-01 | 4.71E-01 |
| REGULATION OF CYTOKINE PRODUCTION INVOLVED IN IMMUNE RESPONSE             | GO:0002718 | 63  | -0.11 | -1.05 | 3.69E-01 | 4.71E-01 |
| REGULATION OF ACTIN POLYMERIZATION OR DEPOLYMERIZATION                    | GO:0008064 | 117 | -0.08 | -1.05 | 3.82E-01 | 4.71E-01 |
| CELLULAR RESPONSE TO IONIZING RADIATION                                   | GO:0071479 | 42  | -0.14 | -1.05 | 3.78E-01 | 4.71E-01 |
| CARDIAC CHAMBER MORPHOGENESIS                                             | GO:0003206 | 33  | -0.15 | -1.05 | 3.88E-01 | 4.70E-01 |
| ORGANIC HYDROXY COMPOUND METABOLIC PROCESS                                | GO:1901615 | 186 | -0.07 | -1.05 | 3.60E-01 | 4.68E-01 |
| REGULATION OF CELL AGING                                                  | GO:0090342 | 30  | -0.16 | -1.06 | 3.82E-01 | 4.68E-01 |
| MODULATION OF PROCESS OF OTHER ORGANISM INVOLVED IN SYMBIOTIC INTERACTION | GO:0051817 | 63  | -0.11 | -1.06 | 3.73E-01 | 4.64E-01 |
| TRANSITION METAL ION HOMEOSTASIS                                          | GO:0055076 | 77  | -0.10 | -1.06 | 3.48E-01 | 4.64E-01 |
| FATTY ACID DERIVATIVE METABOLIC PROCESS                                   | GO:1901568 | 48  | -0.13 | -1.06 | 3.83E-01 | 4.64E-01 |
| MITOTIC DNA INTEGRITY CHECKPOINT SIGNALING                                | GO:0044774 | 66  | -0.11 | -1.06 | 3.52E-01 | 4.64E-01 |
| CELL-MATRIX ADHESION                                                      | GO:0007160 | 56  | -0.12 | -1.06 | 3.64E-01 | 4.64E-01 |
| REGULATION OF ACTIN FILAMENT ORGANIZATION                                 | GO:0110053 | 171 | -0.07 | -1.06 | 3.55E-01 | 4.61E-01 |
| REGULATION OF CATION CHANNEL ACTIVITY                                     | GO:2001257 | 68  | -0.11 | -1.06 | 3.65E-01 | 4.61E-01 |
| POSITIVE REGULATION OF ANGIOGENESIS                                       | GO:0045766 | 74  | -0.11 | -1.06 | 3.75E-01 | 4.59E-01 |
| REGULATION OF RELEASE OF SEQUESTERED CALCIUM ION INTO CYTOSOL             | GO:0051279 | 32  | -0.16 | -1.06 | 3.57E-01 | 4.59E-01 |
| EMBRYONIC ORGAN MORPHOGENESIS                                             | GO:0048562 | 50  | -0.13 | -1.06 | 3.60E-01 | 4.60E-01 |
| PROTEIN LOCALIZATION TO LYSOSOME                                          | GO:0061462 | 34  | -0.15 | -1.06 | 3.51E-01 | 4.60E-01 |
| BONE DEVELOPMENT                                                          | GO:0060348 | 45  | -0.13 | -1.06 | 3.45E-01 | 4.60E-01 |
| GLAND DEVELOPMENT                                                         | GO:0048732 | 63  | -0.12 | -1.06 | 3.74E-01 | 4.60E-01 |
| CARBOHYDRATE HOMEOSTASIS                                                  | GO:0033500 | 73  | -0.11 | -1.07 | 3.54E-01 | 4.60E-01 |
| NEGATIVE REGULATION OF ACTIN FILAMENT POLYMERIZATION                      | GO:0030837 | 30  | -0.16 | -1.07 | 3.70E-01 | 4.59E-01 |
| DOUBLE-STRAND BREAK REPAIR VIA NONHOMOLOGOUS END JOINING                  | GO:0006303 | 38  | -0.15 | -1.07 | 3.47E-01 | 4.58E-01 |
| POSITIVE REGULATION OF NUCLEOCYTOPLASMIC TRANSPORT                        | GO:0046824 | 42  | -0.14 | -1.07 | 3.41E-01 | 4.58E-01 |
| NEGATIVE REGULATION OF MYELOID CELL DIFFERENTIATION                       | GO:0045638 | 37  | -0.15 | -1.07 | 3.68E-01 | 4.58E-01 |
| POSITIVE REGULATION OF CELL DEVELOPMENT                                   | GO:0010720 | 118 | -0.08 | -1.07 | 3.70E-01 | 4.57E-01 |
| LYMPHOCYTE ACTIVATION INVOLVED IN IMMUNE RESPONSE                         | GO:0002285 | 51  | -0.13 | -1.07 | 3.51E-01 | 4.50E-01 |
| OSTEOBLAST DIFFERENTIATION                                                | GO:0001649 | 54  | -0.12 | -1.08 | 3.63E-01 | 4.47E-01 |
| POSITIVE REGULATION OF VASCULATURE DEVELOPMENT                            | GO:1904018 | 74  | -0.11 | -1.08 | 3.33E-01 | 4.47E-01 |
| POSITIVE REGULATION OF AXONOGENESIS                                       | GO:0050772 | 30  | -0.17 | -1.08 | 3.54E-01 | 4.47E-01 |

|                                                       |            |     |       |       |          |          |
|-------------------------------------------------------|------------|-----|-------|-------|----------|----------|
| REGULATION OF FAT CELL DIFFERENTIATION                | GO:0045598 | 65  | -0.12 | -1.08 | 3.54E-01 | 4.46E-01 |
| REGULATION OF HEART CONTRACTION                       | GO:0008016 | 66  | -0.12 | -1.08 | 3.34E-01 | 4.45E-01 |
| RESPONSE TO UV                                        | GO:0009411 | 111 | -0.09 | -1.08 | 3.45E-01 | 4.45E-01 |
| NEGATIVE REGULATION OF VASCULATURE DEVELOPMENT        | GO:1901343 | 57  | -0.12 | -1.08 | 3.41E-01 | 4.45E-01 |
| MITOTIC DNA DAMAGE CHECKPOINT SIGNALING               | GO:0044773 | 62  | -0.11 | -1.08 | 3.54E-01 | 4.45E-01 |
| REGULATION OF PROTEIN POLYMERIZATION                  | GO:0032271 | 148 | -0.08 | -1.08 | 3.25E-01 | 4.45E-01 |
| BIOLOGICAL PROCESS INVOLVED IN INTERACTION WITH HOST  | GO:0051701 | 68  | -0.11 | -1.08 | 3.34E-01 | 4.44E-01 |
| SODIUM ION TRANSPORT                                  | GO:0006814 | 41  | -0.14 | -1.08 | 3.65E-01 | 4.44E-01 |
| GLIOGENESIS                                           | GO:0042063 | 69  | -0.11 | -1.08 | 3.24E-01 | 4.43E-01 |
| RIBONUCLEOPROTEIN COMPLEX LOCALIZATION                | GO:0071166 | 62  | -0.12 | -1.08 | 3.41E-01 | 4.41E-01 |
| NEGATIVE REGULATION OF INTRACELLULAR TRANSPORT        | GO:0032387 | 34  | -0.16 | -1.09 | 3.36E-01 | 4.40E-01 |
| ALCOHOL BIOSYNTHETIC PROCESS                          | GO:0046165 | 56  | -0.12 | -1.09 | 3.53E-01 | 4.39E-01 |
| RESPONSE TO ACID CHEMICAL                             | GO:0001101 | 36  | -0.15 | -1.09 | 3.20E-01 | 4.38E-01 |
| ESTABLISHMENT OR MAINTENANCE OF CELL POLARITY         | GO:0007163 | 111 | -0.09 | -1.09 | 3.24E-01 | 4.36E-01 |
| REGULATION OF POTASSIUM ION TRANSMEMBRANE TRANSPORT   | GO:1901379 | 33  | -0.16 | -1.09 | 3.37E-01 | 4.36E-01 |
| REGULATION OF METAL ION TRANSPORT                     | GO:0010959 | 157 | -0.07 | -1.09 | 3.22E-01 | 4.36E-01 |
| BIOLOGICAL PROCESS INVOLVED IN SYMBIOTIC INTERACTION  | GO:0044403 | 122 | -0.09 | -1.09 | 3.31E-01 | 4.35E-01 |
| SPERMATID DIFFERENTIATION                             | GO:0048515 | 41  | -0.14 | -1.09 | 3.31E-01 | 4.33E-01 |
| REGULATION OF CALCIUM ION TRANSPORT INTO CYTOSOL      | GO:0010522 | 39  | -0.15 | -1.09 | 3.31E-01 | 4.33E-01 |
| NEGATIVE REGULATION OF ANGIOGENESIS                   | GO:0016525 | 57  | -0.12 | -1.09 | 3.36E-01 | 4.32E-01 |
| NEGATIVE REGULATION OF BLOOD VESSEL MORPHOGENESIS     | GO:2000181 | 57  | -0.12 | -1.09 | 3.42E-01 | 4.32E-01 |
| REGULATION OF LYMPHOCYTE PROLIFERATION                | GO:0050670 | 126 | -0.08 | -1.09 | 3.31E-01 | 4.32E-01 |
| GO ID NOT FOUND IN OBO FILE ONTOLOGY DEFINITIONS      | GO:0043044 | 31  | -0.17 | -1.09 | 3.31E-01 | 4.32E-01 |
| REGULATION OF SEQUESTERING OF CALCIUM ION             | GO:0051282 | 52  | -0.13 | -1.10 | 3.22E-01 | 4.29E-01 |
| LIPOPROTEIN METABOLIC PROCESS                         | GO:0042157 | 79  | -0.10 | -1.10 | 3.14E-01 | 4.28E-01 |
| REGULATION OF BLOOD VESSEL ENDOTHELIAL CELL MIGRATION | GO:0043535 | 60  | -0.12 | -1.10 | 3.15E-01 | 4.27E-01 |
| REGULATION OF PROTEIN BINDING                         | GO:0043393 | 115 | -0.09 | -1.10 | 3.22E-01 | 4.22E-01 |
| MITOTIC CELL CYCLE CHECKPOINT SIGNALING               | GO:0007093 | 88  | -0.10 | -1.10 | 3.05E-01 | 4.22E-01 |
| POSITIVE REGULATION OF CELL JUNCTION ASSEMBLY         | GO:1901890 | 32  | -0.17 | -1.10 | 3.09E-01 | 4.21E-01 |
| REGULATION OF EXTENT OF CELL GROWTH                   | GO:0061387 | 42  | -0.14 | -1.11 | 3.26E-01 | 4.12E-01 |
| POSITIVE REGULATION OF PROTEIN ACETYLATION            | GO:1901985 | 33  | -0.16 | -1.11 | 3.02E-01 | 4.11E-01 |
| ORGANIC HYDROXY COMPOUND BIOSYNTHETIC PROCESS         | GO:1901617 | 82  | -0.10 | -1.11 | 3.15E-01 | 4.12E-01 |
| REGULATION OF SPINDLE ORGANIZATION                    | GO:0090224 | 34  | -0.16 | -1.11 | 3.05E-01 | 4.12E-01 |

|                                                                          |            |     |       |       |          |          |
|--------------------------------------------------------------------------|------------|-----|-------|-------|----------|----------|
| CELL-CELL JUNCTION ASSEMBLY                                              | GO:0007043 | 54  | -0.13 | -1.12 | 3.19E-01 | 4.09E-01 |
| REGULATION OF LIPID KINASE ACTIVITY                                      | GO:0043550 | 36  | -0.16 | -1.12 | 3.32E-01 | 4.07E-01 |
| DNA METHYLATION OR DEMETHYLATION                                         | GO:0044728 | 39  | -0.15 | -1.12 | 3.09E-01 | 4.07E-01 |
| REGULATION OF TRANSLATIONAL INITIATION                                   | GO:0006446 | 66  | -0.12 | -1.12 | 2.85E-01 | 4.07E-01 |
| NEGATIVE REGULATION OF PROTEIN UBIQUITINATION                            | GO:0031397 | 60  | -0.12 | -1.12 | 2.99E-01 | 4.07E-01 |
| RIBONUCLEOPROTEIN COMPLEX EXPORT FROM NUCLEUS                            | GO:0071426 | 61  | -0.12 | -1.12 | 3.07E-01 | 4.06E-01 |
| GLUCOSE HOMEOSTASIS                                                      | GO:0042593 | 72  | -0.11 | -1.12 | 3.11E-01 | 4.02E-01 |
| POSITIVE REGULATION OF CHEMOTAXIS                                        | GO:0050921 | 69  | -0.11 | -1.12 | 3.05E-01 | 4.02E-01 |
| STEROID METABOLIC PROCESS                                                | GO:0008202 | 96  | -0.10 | -1.12 | 2.91E-01 | 4.02E-01 |
| REGULATION OF DNA REPLICATION                                            | GO:0006275 | 71  | -0.11 | -1.12 | 2.90E-01 | 4.01E-01 |
| NEGATIVE REGULATION OF PROTEIN POLYMERIZATION                            | GO:0032272 | 39  | -0.15 | -1.12 | 3.09E-01 | 4.00E-01 |
| POSITIVE REGULATION OF DEVELOPMENTAL GROWTH                              | GO:0048639 | 42  | -0.15 | -1.13 | 2.82E-01 | 3.99E-01 |
| STEROL METABOLIC PROCESS                                                 | GO:0016125 | 55  | -0.13 | -1.13 | 2.89E-01 | 3.99E-01 |
| PIGMENTATION                                                             | GO:0043473 | 46  | -0.14 | -1.13 | 2.99E-01 | 3.98E-01 |
| TISSUE MORPHOGENESIS                                                     | GO:0048729 | 146 | -0.08 | -1.13 | 2.74E-01 | 3.97E-01 |
| NEGATIVE REGULATION OF BINDING                                           | GO:0051100 | 95  | -0.10 | -1.13 | 2.69E-01 | 3.94E-01 |
| PROTEIN DEACETYLATION                                                    | GO:0006476 | 48  | -0.14 | -1.13 | 2.86E-01 | 3.94E-01 |
| REGULATION OF CARDIAC MUSCLE CONTRACTION                                 | GO:0055117 | 33  | -0.17 | -1.13 | 2.95E-01 | 3.91E-01 |
| PROTEIN ACETYLATION                                                      | GO:0006473 | 97  | -0.10 | -1.13 | 2.80E-01 | 3.91E-01 |
| REGULATION OF FATTY ACID METABOLIC PROCESS                               | GO:0019217 | 44  | -0.14 | -1.13 | 2.90E-01 | 3.91E-01 |
| POSITIVE REGULATION OF NIK/NF-KAPPAB SIGNALING                           | GO:1901224 | 46  | -0.14 | -1.13 | 2.91E-01 | 3.91E-01 |
| CELLULAR RESPONSE TO TOPOLOGICALLY INCORRECT PROTEIN                     | GO:0035967 | 72  | -0.11 | -1.13 | 2.88E-01 | 3.91E-01 |
| PROTEOGLYCAN BIOSYNTHETIC PROCESS                                        | GO:0030166 | 36  | -0.16 | -1.14 | 2.95E-01 | 3.91E-01 |
| RESPONSE TO XENOBIOTIC STIMULUS                                          | GO:0009410 | 36  | -0.16 | -1.14 | 2.90E-01 | 3.91E-01 |
| REGULATION OF CENTROSOME CYCLE                                           | GO:0046605 | 33  | -0.16 | -1.14 | 2.93E-01 | 3.91E-01 |
| RIBONUCLEOSIDE BISPHOSPHATE METABOLIC PROCESS                            | GO:0033875 | 83  | -0.11 | -1.14 | 2.86E-01 | 3.91E-01 |
| REGULATION OF MONONUCLEAR CELL PROLIFERATION                             | GO:0032944 | 127 | -0.09 | -1.14 | 2.86E-01 | 3.90E-01 |
| NUCLEOSIDE BISPHOSPHATE METABOLIC PROCESS                                | GO:0033865 | 83  | -0.11 | -1.14 | 2.75E-01 | 3.90E-01 |
| REGULATION OF ACTIN FILAMENT LENGTH                                      | GO:0030832 | 118 | -0.09 | -1.14 | 2.90E-01 | 3.90E-01 |
| NEGATIVE REGULATION OF CELL CYCLE G1/S PHASE TRANSITION                  | GO:1902807 | 50  | -0.14 | -1.14 | 2.91E-01 | 3.89E-01 |
| PEPTIDYL-LYSINE METHYLATION                                              | GO:0018022 | 60  | -0.12 | -1.14 | 2.83E-01 | 3.89E-01 |
| POSITIVE REGULATION OF STRESS-ACTIVATED PROTEIN KINASE SIGNALING CASCADE | GO:0070304 | 80  | -0.11 | -1.14 | 2.81E-01 | 3.89E-01 |
| DNA-TEMPLATED TRANSCRIPTION, INITIATION                                  | GO:0006352 | 60  | -0.13 | -1.14 | 2.92E-01 | 3.89E-01 |

|                                                                    |            |     |       |       |          |          |
|--------------------------------------------------------------------|------------|-----|-------|-------|----------|----------|
| PURINE NUCLEOSIDE BISPHOSPHATE METABOLIC PROCESS                   | GO:0034032 | 83  | -0.11 | -1.14 | 2.79E-01 | 3.89E-01 |
| POSITIVE REGULATION OF CELL-SUBSTRATE ADHESION                     | GO:0010811 | 58  | -0.12 | -1.14 | 2.81E-01 | 3.88E-01 |
| CELLULAR RESPONSE TO AMINO ACID STARVATION                         | GO:0034198 | 36  | -0.16 | -1.14 | 2.83E-01 | 3.87E-01 |
| REGULATION OF NEURON DIFFERENTIATION                               | GO:0045664 | 46  | -0.14 | -1.14 | 2.71E-01 | 3.87E-01 |
| AMIDE TRANSPORT                                                    | GO:0042886 | 50  | -0.14 | -1.14 | 2.88E-01 | 3.87E-01 |
| PROTEIN ALKYLATION                                                 | GO:0008213 | 88  | -0.10 | -1.14 | 2.90E-01 | 3.86E-01 |
| GLYCOSAMINOGLYCAN METABOLIC PROCESS                                | GO:0030203 | 60  | -0.12 | -1.15 | 2.73E-01 | 3.83E-01 |
| REGULATION OF NEUROTRANSMITTER LEVELS                              | GO:0001505 | 76  | -0.11 | -1.15 | 2.66E-01 | 3.82E-01 |
| VIRAL LIFE CYCLE                                                   | GO:0019058 | 91  | -0.10 | -1.15 | 2.77E-01 | 3.82E-01 |
| MAINTENANCE OF LOCATION                                            | GO:0051235 | 107 | -0.10 | -1.15 | 2.93E-01 | 3.81E-01 |
| REGULATION OF BIOLOGICAL PROCESS INVOLVED IN SYMBIOTIC INTERACTION | GO:0043903 | 51  | -0.14 | -1.15 | 2.71E-01 | 3.79E-01 |
| MESENCHYMAL CELL DIFFERENTIATION                                   | GO:0048762 | 65  | -0.12 | -1.15 | 2.68E-01 | 3.77E-01 |
| MACROMOLECULE METHYLATION                                          | GO:0043414 | 174 | -0.08 | -1.15 | 2.64E-01 | 3.76E-01 |
| REGULATION OF DEFENSE RESPONSE TO VIRUS BY HOST                    | GO:0050691 | 31  | -0.17 | -1.16 | 2.42E-01 | 3.73E-01 |
| REGULATION OF MITOTIC SISTER CHROMATID SEPARATION                  | GO:0010965 | 51  | -0.14 | -1.16 | 2.82E-01 | 3.73E-01 |
| ACTIN POLYMERIZATION OR DEPOLYMERIZATION                           | GO:0008154 | 40  | -0.16 | -1.16 | 2.63E-01 | 3.72E-01 |
| MUSCLE ORGAN DEVELOPMENT                                           | GO:0007517 | 72  | -0.11 | -1.16 | 2.74E-01 | 3.70E-01 |
| PROTEIN METHYLATION                                                | GO:0006479 | 88  | -0.10 | -1.16 | 2.56E-01 | 3.67E-01 |
| REGULATION OF PROTEIN LOCALIZATION TO MEMBRANE                     | GO:1905475 | 108 | -0.10 | -1.16 | 2.80E-01 | 3.67E-01 |
| REGULATION OF PROTEIN SECRETION                                    | GO:0050708 | 111 | -0.09 | -1.16 | 2.58E-01 | 3.66E-01 |
| REGULATION OF PRODUCTION OF MOLECULAR MEDIATOR OF IMMUNE RESPONSE  | GO:0002700 | 100 | -0.10 | -1.16 | 2.61E-01 | 3.67E-01 |
| ALCOHOL METABOLIC PROCESS                                          | GO:0006066 | 145 | -0.08 | -1.16 | 2.62E-01 | 3.67E-01 |
| MEIOTIC NUCLEAR DIVISION                                           | GO:0140013 | 53  | -0.14 | -1.16 | 2.48E-01 | 3.67E-01 |
| POSITIVE REGULATION OF PROTEIN-CONTAINING COMPLEX ASSEMBLY         | GO:0031334 | 162 | -0.08 | -1.16 | 2.41E-01 | 3.66E-01 |
| CELLULAR RESPONSE TO GLUCOSE STARVATION                            | GO:0042149 | 35  | -0.17 | -1.17 | 2.62E-01 | 3.65E-01 |
| NEGATIVE REGULATION OF CELLULAR CATABOLIC PROCESS                  | GO:0031330 | 173 | -0.08 | -1.17 | 2.43E-01 | 3.65E-01 |
| CELLULAR RESPONSE TO METAL ION                                     | GO:0071248 | 77  | -0.11 | -1.17 | 2.56E-01 | 3.65E-01 |
| REGULATION OF MYELOID LEUKOCYTE MEDIATED IMMUNITY                  | GO:0002886 | 35  | -0.16 | -1.17 | 2.44E-01 | 3.66E-01 |
| SMALL GTPASE MEDIATED SIGNAL TRANSDUCTION                          | GO:0007264 | 144 | -0.08 | -1.17 | 2.35E-01 | 3.65E-01 |
| ISOPRENOID METABOLIC PROCESS                                       | GO:0006720 | 40  | -0.16 | -1.17 | 2.54E-01 | 3.63E-01 |
| MONONUCLEAR CELL PROLIFERATION                                     | GO:0032943 | 31  | -0.18 | -1.17 | 2.43E-01 | 3.62E-01 |
| REGULATION OF SMOOTHENED SIGNALING PATHWAY                         | GO:0008589 | 32  | -0.17 | -1.17 | 2.74E-01 | 3.62E-01 |
| XENOBIOTIC METABOLIC PROCESS                                       | GO:0006805 | 34  | -0.17 | -1.17 | 2.51E-01 | 3.60E-01 |

|                                                                  |            |     |       |       |          |          |
|------------------------------------------------------------------|------------|-----|-------|-------|----------|----------|
| RNA EXPORT FROM NUCLEUS                                          | GO:0006405 | 63  | -0.13 | -1.17 | 2.39E-01 | 3.60E-01 |
| REGULATION OF CELL MORPHOGENESIS INVOLVED IN DIFFERENTIATION     | GO:0010769 | 53  | -0.14 | -1.17 | 2.67E-01 | 3.60E-01 |
| PROTEIN LOCALIZATION TO CHROMOSOME                               | GO:0034502 | 53  | -0.13 | -1.17 | 2.33E-01 | 3.60E-01 |
| SKELETAL SYSTEM DEVELOPMENT                                      | GO:0001501 | 120 | -0.09 | -1.17 | 2.54E-01 | 3.59E-01 |
| REGULATION OF CHROMOSOME SEPARATION                              | GO:1905818 | 56  | -0.13 | -1.17 | 2.54E-01 | 3.59E-01 |
| POSITIVE REGULATION OF LEUKOCYTE MIGRATION                       | GO:0002687 | 76  | -0.11 | -1.18 | 2.52E-01 | 3.58E-01 |
| REGULATION OF SODIUM ION TRANSPORT                               | GO:0002028 | 34  | -0.17 | -1.18 | 2.65E-01 | 3.58E-01 |
| REGULATION OF PROTEIN ACETYLATION                                | GO:1901983 | 51  | -0.14 | -1.18 | 2.46E-01 | 3.57E-01 |
| REGULATION OF IMMUNOGLOBULIN MEDIATED IMMUNE RESPONSE            | GO:0002889 | 31  | -0.18 | -1.18 | 2.43E-01 | 3.58E-01 |
| DNA INTEGRITY CHECKPOINT SIGNALING                               | GO:0031570 | 87  | -0.11 | -1.18 | 2.46E-01 | 3.58E-01 |
| MITOCHONDRION LOCALIZATION                                       | GO:0051646 | 32  | -0.18 | -1.18 | 2.63E-01 | 3.58E-01 |
| POSITIVE REGULATION OF SECRETION BY CELL                         | GO:1903532 | 121 | -0.09 | -1.18 | 2.57E-01 | 3.58E-01 |
| POSITIVE REGULATION OF REACTIVE OXYGEN SPECIES METABOLIC PROCESS | GO:2000379 | 42  | -0.15 | -1.18 | 2.47E-01 | 3.58E-01 |
| REGULATION OF CYCLIN-DEPENDENT PROTEIN KINASE ACTIVITY           | GO:1904029 | 68  | -0.12 | -1.18 | 2.58E-01 | 3.58E-01 |
| REGULATION OF SMALL MOLECULE METABOLIC PROCESS                   | GO:0062012 | 164 | -0.08 | -1.18 | 2.54E-01 | 3.59E-01 |
| SENSORY ORGAN MORPHOGENESIS                                      | GO:0090596 | 48  | -0.14 | -1.18 | 2.56E-01 | 3.59E-01 |
| REGULATION OF STRIATED MUSCLE CONTRACTION                        | GO:0006942 | 40  | -0.16 | -1.18 | 2.53E-01 | 3.59E-01 |
| SODIUM ION TRANSMEMBRANE TRANSPORT                               | GO:0035725 | 31  | -0.17 | -1.18 | 2.57E-01 | 3.59E-01 |
| POSITIVE REGULATION OF ION TRANSMEMBRANE TRANSPORTER ACTIVITY    | GO:0032414 | 46  | -0.15 | -1.18 | 2.54E-01 | 3.57E-01 |
| REGULATION OF ALPHA-BETA T CELL DIFFERENTIATION                  | GO:0046637 | 40  | -0.16 | -1.18 | 2.43E-01 | 3.55E-01 |
| LYMPHOCYTE MIGRATION                                             | GO:0072676 | 31  | -0.18 | -1.19 | 2.34E-01 | 3.52E-01 |
| REGULATION OF DNA RECOMBINATION                                  | GO:0000018 | 71  | -0.12 | -1.19 | 2.42E-01 | 3.52E-01 |
| REGULATION OF RECEPTOR SIGNALING PATHWAY VIA STAT                | GO:1904892 | 39  | -0.16 | -1.19 | 2.47E-01 | 3.52E-01 |
| REGULATION OF MITOTIC METAPHASE/ANAPHASE TRANSITION              | GO:0030071 | 48  | -0.15 | -1.19 | 2.49E-01 | 3.51E-01 |
| PROTEIN LOCALIZATION TO CELL PERIPHERY                           | GO:1990778 | 141 | -0.09 | -1.19 | 2.37E-01 | 3.48E-01 |
| REGULATION OF ATPASE ACTIVITY                                    | GO:0043462 | 32  | -0.18 | -1.19 | 2.38E-01 | 3.48E-01 |
| SENSORY PERCEPTION                                               | GO:0007600 | 101 | -0.10 | -1.19 | 2.76E-01 | 3.48E-01 |
| POSITIVE REGULATION OF HISTONE MODIFICATION                      | GO:0031058 | 58  | -0.13 | -1.19 | 2.51E-01 | 3.46E-01 |
| NEGATIVE REGULATION OF EPITHELIAL CELL MIGRATION                 | GO:0010633 | 38  | -0.16 | -1.19 | 2.37E-01 | 3.45E-01 |
| POSITIVE REGULATION OF PROTEIN LOCALIZATION TO PLASMA MEMBRANE   | GO:1903078 | 39  | -0.16 | -1.19 | 2.32E-01 | 3.45E-01 |
| RNA CATABOLIC PROCESS                                            | GO:0006401 | 136 | -0.09 | -1.19 | 2.20E-01 | 3.45E-01 |
| RAS PROTEIN SIGNAL TRANSDUCTION                                  | GO:0007265 | 115 | -0.10 | -1.19 | 2.49E-01 | 3.45E-01 |
| REGULATION OF PROTEIN MATURATION                                 | GO:1903317 | 32  | -0.18 | -1.19 | 2.48E-01 | 3.45E-01 |



|                                                                         |            |     |       |       |          |          |
|-------------------------------------------------------------------------|------------|-----|-------|-------|----------|----------|
| POSITIVE REGULATION OF MYELOID CELL DIFFERENTIATION                     | GO:0045639 | 57  | -0.13 | -1.20 | 2.37E-01 | 3.44E-01 |
| REGULATION OF POSTSYNAPSE ORGANIZATION                                  | GO:0099175 | 32  | -0.18 | -1.20 | 2.37E-01 | 3.43E-01 |
| FERTILIZATION                                                           | GO:0009566 | 33  | -0.18 | -1.20 | 2.31E-01 | 3.43E-01 |
| PROTEIN ACYLATION                                                       | GO:0043543 | 133 | -0.09 | -1.20 | 2.27E-01 | 3.40E-01 |
| LEUKOCYTE PROLIFERATION                                                 | GO:0070661 | 34  | -0.17 | -1.20 | 2.38E-01 | 3.39E-01 |
| NEGATIVE REGULATION OF TOR SIGNALING                                    | GO:0032007 | 34  | -0.18 | -1.20 | 2.33E-01 | 3.39E-01 |
| DNA DAMAGE CHECKPOINT SIGNALING                                         | GO:0000077 | 81  | -0.11 | -1.20 | 2.30E-01 | 3.38E-01 |
| REGULATION OF CALCIUM ION TRANSPORT                                     | GO:0051924 | 100 | -0.10 | -1.20 | 2.33E-01 | 3.38E-01 |
| ACYL-COA METABOLIC PROCESS                                              | GO:0006637 | 63  | -0.13 | -1.20 | 2.39E-01 | 3.37E-01 |
| MEMBRANE LIPID BIOSYNTHETIC PROCESS                                     | GO:0046467 | 89  | -0.11 | -1.21 | 2.13E-01 | 3.36E-01 |
| CELLULAR RESPONSE TO RADIATION                                          | GO:0071478 | 106 | -0.10 | -1.21 | 2.43E-01 | 3.36E-01 |
| SELECTIVE AUTOPHAGY                                                     | GO:0061912 | 32  | -0.18 | -1.21 | 2.29E-01 | 3.36E-01 |
| REGULATION OF DEPHOSPHORYLATION                                         | GO:0035303 | 84  | -0.11 | -1.21 | 2.33E-01 | 3.36E-01 |
| REGULATION OF CALCIUM ION TRANSMEMBRANE TRANSPORTER ACTIVITY            | GO:1901019 | 39  | -0.16 | -1.21 | 2.17E-01 | 3.35E-01 |
| DNA-DEPENDENT DNA REPLICATION                                           | GO:0006261 | 103 | -0.10 | -1.21 | 2.27E-01 | 3.35E-01 |
| POSITIVE REGULATION OF DNA REPAIR                                       | GO:0045739 | 58  | -0.13 | -1.21 | 2.22E-01 | 3.36E-01 |
| REGULATION OF SMOOTH MUSCLE CELL PROLIFERATION                          | GO:0048660 | 51  | -0.14 | -1.21 | 2.28E-01 | 3.36E-01 |
| DNA GEOMETRIC CHANGE                                                    | GO:0032392 | 37  | -0.17 | -1.21 | 2.32E-01 | 3.34E-01 |
| CELLULAR RESPONSE TO CALCIUM ION                                        | GO:0071277 | 35  | -0.17 | -1.21 | 2.12E-01 | 3.31E-01 |
| ESTABLISHMENT OF PROTEIN LOCALIZATION TO PLASMA MEMBRANE                | GO:0061951 | 38  | -0.16 | -1.21 | 2.18E-01 | 3.30E-01 |
| THIOESTER METABOLIC PROCESS                                             | GO:0035383 | 63  | -0.13 | -1.21 | 2.16E-01 | 3.29E-01 |
| EMBRYONIC ORGAN DEVELOPMENT                                             | GO:0048568 | 89  | -0.11 | -1.22 | 2.23E-01 | 3.26E-01 |
| REPRODUCTIVE STRUCTURE DEVELOPMENT                                      | GO:0048608 | 60  | -0.13 | -1.22 | 2.23E-01 | 3.26E-01 |
| POSITIVE REGULATION OF PLASMA MEMBRANE BOUNDED CELL PROJECTION ASSEMBLY | GO:0120034 | 71  | -0.12 | -1.22 | 2.22E-01 | 3.26E-01 |
| POSITIVE REGULATION OF TELOMERE MAINTENANCE                             | GO:0032206 | 45  | -0.15 | -1.22 | 2.26E-01 | 3.26E-01 |
| NEGATIVE REGULATION OF NEURON PROJECTION DEVELOPMENT                    | GO:0010977 | 49  | -0.15 | -1.22 | 2.25E-01 | 3.24E-01 |
| INTERNAL PROTEIN AMINO ACID ACETYLATION                                 | GO:0006475 | 81  | -0.11 | -1.22 | 2.10E-01 | 3.23E-01 |
| REGULATION OF P38MAPK CASCADE                                           | GO:1900744 | 32  | -0.18 | -1.22 | 2.17E-01 | 3.24E-01 |
| METHYLATION                                                             | GO:0032259 | 181 | -0.08 | -1.22 | 1.93E-01 | 3.23E-01 |
| ANTIGEN PROCESSING AND PRESENTATION                                     | GO:0019882 | 71  | -0.12 | -1.22 | 1.88E-01 | 3.22E-01 |
| REGULATION OF HISTONE MODIFICATION                                      | GO:0031056 | 93  | -0.11 | -1.22 | 2.33E-01 | 3.22E-01 |
| POSITIVE REGULATION OF SMALL MOLECULE METABOLIC PROCESS                 | GO:0062013 | 62  | -0.13 | -1.22 | 2.19E-01 | 3.22E-01 |

|                                                                |            |     |       |       |          |          |
|----------------------------------------------------------------|------------|-----|-------|-------|----------|----------|
| REGULATION OF MICROTUBULE POLYMERIZATION OR DEPOLYMERIZATION   | GO:0031110 | 58  | -0.14 | -1.23 | 2.11E-01 | 3.21E-01 |
| PHAGOCYTOSIS                                                   | GO:0006909 | 151 | -0.09 | -1.23 | 2.21E-01 | 3.19E-01 |
| RESPONSE TO AMINO ACID STARVATION                              | GO:1990928 | 37  | -0.17 | -1.23 | 2.05E-01 | 3.19E-01 |
| POSITIVE REGULATION OF TELOMERE MAINTENANCE VIA TELOMERASE     | GO:0032212 | 30  | -0.19 | -1.23 | 2.20E-01 | 3.19E-01 |
| REGULATION OF CD4-POSITIVE, ALPHA-BETA T CELL DIFFERENTIATION  | GO:0043370 | 34  | -0.17 | -1.23 | 2.07E-01 | 3.19E-01 |
| REGULATION OF CHEMOTAXIS                                       | GO:0050920 | 110 | -0.10 | -1.23 | 2.24E-01 | 3.17E-01 |
| POSITIVE REGULATION OF EXOCYTOSIS                              | GO:0045921 | 51  | -0.14 | -1.23 | 1.90E-01 | 3.16E-01 |
| REGULATION OF PROTEIN IMPORT INTO NUCLEUS                      | GO:0042306 | 30  | -0.19 | -1.23 | 2.10E-01 | 3.17E-01 |
| CARDIAC VENTRICLE DEVELOPMENT                                  | GO:0003231 | 34  | -0.18 | -1.23 | 2.24E-01 | 3.17E-01 |
| FATTY ACID DERIVATIVE BIOSYNTHETIC PROCESS                     | GO:1901570 | 33  | -0.18 | -1.23 | 1.86E-01 | 3.16E-01 |
| VIRAL PROCESS                                                  | GO:0016032 | 157 | -0.09 | -1.23 | 1.98E-01 | 3.17E-01 |
| PROTEIN DEACYLATION                                            | GO:0035601 | 56  | -0.14 | -1.23 | 1.94E-01 | 3.16E-01 |
| REGULATION OF TUMOR NECROSIS FACTOR-MEDIATED SIGNALING PATHWAY | GO:0010803 | 33  | -0.18 | -1.23 | 2.17E-01 | 3.17E-01 |
| MULTIVESICULAR BODY SORTING PATHWAY                            | GO:0071985 | 35  | -0.17 | -1.23 | 2.31E-01 | 3.16E-01 |
| REGULATION OF RECEPTOR SIGNALING PATHWAY VIA JAK-STAT          | GO:0046425 | 36  | -0.17 | -1.23 | 1.91E-01 | 3.16E-01 |
| REGULATION OF T CELL PROLIFERATION                             | GO:0042129 | 92  | -0.11 | -1.24 | 2.03E-01 | 3.15E-01 |
| REPRODUCTIVE SYSTEM DEVELOPMENT                                | GO:0061458 | 60  | -0.13 | -1.24 | 2.16E-01 | 3.16E-01 |
| REGULATION OF LEUKOCYTE PROLIFERATION                          | GO:0070663 | 136 | -0.09 | -1.24 | 2.04E-01 | 3.16E-01 |
| NEGATIVE REGULATION OF PEPTIDYL-TYROSINE PHOSPHORYLATION       | GO:0050732 | 37  | -0.17 | -1.24 | 2.15E-01 | 3.16E-01 |
| REGULATION OF PH                                               | GO:0006885 | 51  | -0.15 | -1.24 | 2.06E-01 | 3.16E-01 |
| REGULATION OF DEFENSE RESPONSE TO VIRUS                        | GO:0050688 | 50  | -0.15 | -1.24 | 2.06E-01 | 3.16E-01 |
| CAMERA-TYPE EYE DEVELOPMENT                                    | GO:0043010 | 55  | -0.14 | -1.24 | 1.87E-01 | 3.16E-01 |
| REGULATION OF PHOSPHOPROTEIN PHOSPHATASE ACTIVITY              | GO:0043666 | 41  | -0.17 | -1.24 | 2.09E-01 | 3.16E-01 |
| RESPONSE TO TOPOLOGICALLY INCORRECT PROTEIN                    | GO:0035966 | 90  | -0.11 | -1.24 | 1.96E-01 | 3.13E-01 |
| ESTABLISHMENT OF CELL POLARITY                                 | GO:0030010 | 64  | -0.13 | -1.24 | 2.13E-01 | 3.13E-01 |
| MUSCLE STRUCTURE DEVELOPMENT                                   | GO:0061061 | 135 | -0.09 | -1.24 | 1.91E-01 | 3.13E-01 |
| REGULATION OF B CELL MEDIATED IMMUNITY                         | GO:0002712 | 32  | -0.19 | -1.24 | 1.96E-01 | 3.13E-01 |
| HISTONE DEACETYLATION                                          | GO:0016575 | 43  | -0.16 | -1.24 | 1.86E-01 | 3.11E-01 |
| INORGANIC CATION TRANSMEMBRANE TRANSPORT                       | GO:0098662 | 183 | -0.08 | -1.25 | 1.89E-01 | 3.09E-01 |
| REGULATION OF NERVOUS SYSTEM PROCESS                           | GO:0031644 | 40  | -0.16 | -1.25 | 1.72E-01 | 3.09E-01 |
| POSITIVE REGULATION OF ION TRANSMEMBRANE TRANSPORT             | GO:0034767 | 66  | -0.13 | -1.25 | 2.12E-01 | 3.08E-01 |
| CELLULAR RESPONSE TO OXIDATIVE STRESS                          | GO:0034599 | 130 | -0.09 | -1.25 | 1.78E-01 | 3.08E-01 |
| POSITIVE REGULATION OF CATION TRANSMEMBRANE TRANSPORT          | GO:1904064 | 57  | -0.14 | -1.25 | 1.93E-01 | 3.08E-01 |

|                                                                                           |            |     |       |       |          |          |
|-------------------------------------------------------------------------------------------|------------|-----|-------|-------|----------|----------|
| CELLULAR BIOGENIC AMINE METABOLIC PROCESS                                                 | GO:0006576 | 37  | -0.18 | -1.25 | 2.08E-01 | 3.07E-01 |
| MRNA-CONTAINING RIBONUCLEOPROTEIN COMPLEX EXPORT FROM NUCLEUS                             | GO:0071427 | 45  | -0.16 | -1.25 | 1.81E-01 | 3.08E-01 |
| REGULATION OF STEROID METABOLIC PROCESS                                                   | GO:0019218 | 40  | -0.17 | -1.25 | 1.93E-01 | 3.08E-01 |
| POSITIVE REGULATION OF EPITHELIAL CELL PROLIFERATION                                      | GO:0050679 | 69  | -0.13 | -1.25 | 2.01E-01 | 3.07E-01 |
| RESPONSE TO PURINE-CONTAINING COMPOUND                                                    | GO:0014074 | 39  | -0.17 | -1.25 | 1.97E-01 | 3.07E-01 |
| MITOTIC G2/M TRANSITION CHECKPOINT                                                        | GO:0044818 | 38  | -0.18 | -1.25 | 1.80E-01 | 3.06E-01 |
| CELLULAR RESPONSE TO VIRUS                                                                | GO:0098586 | 34  | -0.18 | -1.25 | 1.98E-01 | 3.06E-01 |
| GLYCOSAMINOGLYCAN BIOSYNTHETIC PROCESS                                                    | GO:0006024 | 46  | -0.15 | -1.25 | 1.81E-01 | 3.06E-01 |
| REGULATION OF CYCLIN-DEPENDENT PROTEIN SERINE/THREONINE KINASE ACTIVITY                   | GO:0000079 | 66  | -0.13 | -1.25 | 1.80E-01 | 3.07E-01 |
| MACROMOLECULE DEACYLATION                                                                 | GO:0098732 | 56  | -0.14 | -1.25 | 1.96E-01 | 3.07E-01 |
| CELL CYCLE CHECKPOINT SIGNALING                                                           | GO:0000075 | 109 | -0.10 | -1.25 | 1.95E-01 | 3.07E-01 |
| PLASMA MEMBRANE ORGANIZATION                                                              | GO:0007009 | 61  | -0.14 | -1.25 | 1.81E-01 | 3.05E-01 |
| HEART VALVE DEVELOPMENT                                                                   | GO:0003170 | 30  | -0.19 | -1.26 | 1.95E-01 | 3.01E-01 |
| CELLULAR AMINE METABOLIC PROCESS                                                          | GO:0044106 | 37  | -0.18 | -1.26 | 1.85E-01 | 3.01E-01 |
| POLYOL METABOLIC PROCESS                                                                  | GO:0019751 | 56  | -0.14 | -1.26 | 2.02E-01 | 3.00E-01 |
| RECOMBINATION                                                                             | GO:0010569 | 39  | -0.16 | -1.26 | 1.88E-01 | 3.00E-01 |
| POSITIVE REGULATION OF DOUBLE-STRAND BREAK REPAIR                                         | GO:2000781 | 33  | -0.19 | -1.26 | 1.92E-01 | 3.00E-01 |
| CELLULAR RESPONSE TO XENOBIOTIC STIMULUS                                                  | GO:0071466 | 35  | -0.18 | -1.26 | 1.97E-01 | 2.99E-01 |
| REGULATION OF LYMPHOCYTE DIFFERENTIATION                                                  | GO:0045619 | 96  | -0.11 | -1.26 | 1.98E-01 | 2.95E-01 |
| REGULATION OF ENDOTHELIAL CELL MIGRATION                                                  | GO:0010594 | 104 | -0.11 | -1.27 | 1.73E-01 | 2.95E-01 |
| TRANSCRIPTION INITIATION FROM RNA POLYMERASE II PROMOTER                                  | GO:0006367 | 39  | -0.17 | -1.27 | 1.84E-01 | 2.95E-01 |
| G1/S TRANSITION OF MITOTIC CELL CYCLE                                                     | GO:0000082 | 57  | -0.14 | -1.27 | 1.83E-01 | 2.92E-01 |
| POSITIVE REGULATION OF INTERFERON-GAMMA PRODUCTION                                        | GO:0032729 | 45  | -0.16 | -1.27 | 1.90E-01 | 2.92E-01 |
| POSITIVE REGULATION OF LIPID METABOLIC PROCESS                                            | GO:0045834 | 74  | -0.13 | -1.27 | 1.61E-01 | 2.91E-01 |
| INTERNAL PEPTIDYL-LYSINE ACETYLATION                                                      | GO:0018393 | 79  | -0.12 | -1.27 | 1.84E-01 | 2.91E-01 |
| CELLULAR RESPONSE TO UNFOLDED PROTEIN                                                     | GO:0034620 | 54  | -0.15 | -1.27 | 1.79E-01 | 2.90E-01 |
| EXTRACELLULAR MATRIX ORGANIZATION                                                         | GO:0030198 | 76  | -0.13 | -1.27 | 1.75E-01 | 2.90E-01 |
| EXTRACELLULAR STRUCTURE ORGANIZATION                                                      | GO:0043062 | 76  | -0.13 | -1.27 | 1.88E-01 | 2.90E-01 |
| MONOVALENT INORGANIC CATION HOMEOSTASIS                                                   | GO:0055067 | 68  | -0.13 | -1.27 | 1.97E-01 | 2.90E-01 |
| ENTRY INTO HOST                                                                           | GO:0044409 | 31  | -0.19 | -1.27 | 1.69E-01 | 2.90E-01 |
| POSITIVE REGULATION OF CYSTEINE-TYPE ENDOPEPTIDASE ACTIVITY INVOLVED IN APOPTOTIC PROCESS | GO:0043280 | 92  | -0.11 | -1.27 | 1.72E-01 | 2.90E-01 |
| REGULATION OF EXTRINSIC APOPTOTIC SIGNALING PATHWAY                                       | GO:2001236 | 83  | -0.11 | -1.27 | 1.84E-01 | 2.89E-01 |

|                                                                         |            |     |       |       |          |          |
|-------------------------------------------------------------------------|------------|-----|-------|-------|----------|----------|
| RESPONSE TO ORGANOPHOSPHORUS                                            | GO:0046683 | 39  | -0.17 | -1.28 | 1.73E-01 | 2.87E-01 |
| POSITIVE REGULATION OF CELL CYCLE PHASE TRANSITION                      | GO:1901989 | 68  | -0.13 | -1.28 | 1.91E-01 | 2.87E-01 |
| CALCIUM ION TRANSMEMBRANE TRANSPORT                                     | GO:0070588 | 66  | -0.14 | -1.28 | 1.66E-01 | 2.84E-01 |
| POSITIVE REGULATION OF T CELL MEDIATED IMMUNITY                         | GO:0002711 | 38  | -0.17 | -1.28 | 1.74E-01 | 2.84E-01 |
| FAT CELL DIFFERENTIATION                                                | GO:0045444 | 42  | -0.17 | -1.28 | 1.74E-01 | 2.84E-01 |
| MRNA EXPORT FROM NUCLEUS                                                | GO:0006406 | 45  | -0.16 | -1.28 | 1.48E-01 | 2.81E-01 |
| MOVEMENT IN HOST ENVIRONMENT                                            | GO:0052126 | 41  | -0.17 | -1.28 | 1.55E-01 | 2.81E-01 |
| CELLULAR RESPONSE TO INORGANIC SUBSTANCE                                | GO:0071241 | 89  | -0.12 | -1.28 | 1.76E-01 | 2.81E-01 |
| PEPTIDYL-LYSINE ACETYLATION                                             | GO:0018394 | 82  | -0.12 | -1.29 | 1.72E-01 | 2.81E-01 |
| EPITHELIAL TO MESENCHYMAL TRANSITION                                    | GO:0001837 | 41  | -0.17 | -1.29 | 1.64E-01 | 2.80E-01 |
| RETROGRADE TRANSPORT, ENDOSOME TO GOLGI                                 | GO:0042147 | 83  | -0.12 | -1.29 | 1.70E-01 | 2.76E-01 |
| HEART MORPHOGENESIS                                                     | GO:0003007 | 68  | -0.14 | -1.29 | 1.68E-01 | 2.76E-01 |
| CELL JUNCTION ORGANIZATION                                              | GO:0034330 | 180 | -0.08 | -1.29 | 1.56E-01 | 2.75E-01 |
| AMINOGLYCAN METABOLIC PROCESS                                           | GO:0006022 | 67  | -0.13 | -1.29 | 1.72E-01 | 2.75E-01 |
| REGULATION OF INTRACELLULAR PH                                          | GO:0051453 | 46  | -0.16 | -1.29 | 1.66E-01 | 2.76E-01 |
| ANION TRANSMEMBRANE TRANSPORT                                           | GO:0098656 | 75  | -0.13 | -1.30 | 1.58E-01 | 2.72E-01 |
| CELLULAR RESPONSE TO OXYGEN LEVELS                                      | GO:0071453 | 71  | -0.13 | -1.30 | 1.57E-01 | 2.69E-01 |
| NEGATIVE REGULATION OF PROTEIN MODIFICATION BY SMALL PROTEIN            |            |     |       |       |          |          |
| CONJUGATION OR REMOVAL                                                  | GO:1903321 | 66  | -0.14 | -1.30 | 1.60E-01 | 2.69E-01 |
| REGULATION OF ERBB SIGNALING PATHWAY                                    | GO:1901184 | 53  | -0.15 | -1.30 | 1.66E-01 | 2.69E-01 |
| CELL CYCLE G1/S PHASE TRANSITION                                        | GO:0044843 | 59  | -0.14 | -1.30 | 1.68E-01 | 2.70E-01 |
| AMINO ACID TRANSMEMBRANE TRANSPORT                                      | GO:0003333 | 34  | -0.19 | -1.30 | 1.65E-01 | 2.68E-01 |
| REGULATION OF METAPHASE/ANAPHASE TRANSITION OF CELL CYCLE               | GO:1902099 | 49  | -0.16 | -1.30 | 1.70E-01 | 2.65E-01 |
| LYMPHOCYTE DIFFERENTIATION                                              | GO:0030098 | 110 | -0.11 | -1.30 | 1.67E-01 | 2.65E-01 |
| REGULATION OF PROTEIN IMPORT                                            | GO:1904589 | 33  | -0.19 | -1.31 | 1.48E-01 | 2.64E-01 |
| POSITIVE REGULATION OF GROWTH                                           | GO:0045927 | 95  | -0.12 | -1.31 | 1.50E-01 | 2.64E-01 |
| REGULATION OF PLASMA MEMBRANE BOUNDED CELL PROJECTION ASSEMBLY          | GO:0120032 | 142 | -0.10 | -1.31 | 1.56E-01 | 2.61E-01 |
| NEGATIVE REGULATION OF CYSTEINE-TYPE ENDOPEPTIDASE ACTIVITY INVOLVED IN |            |     |       |       |          |          |
| APOPTOTIC PROCESS                                                       | GO:0043154 | 44  | -0.17 | -1.31 | 1.52E-01 | 2.59E-01 |
| MITOTIC CELL CYCLE PHASE TRANSITION                                     | GO:0044772 | 115 | -0.10 | -1.31 | 1.54E-01 | 2.59E-01 |
| REGULATION OF FILOPODIUM ASSEMBLY                                       | GO:0051489 | 31  | -0.19 | -1.31 | 1.41E-01 | 2.59E-01 |
| REGULATION OF RESPONSE TO ENDOPLASMIC RETICULUM STRESS                  | GO:1905897 | 64  | -0.14 | -1.31 | 1.51E-01 | 2.58E-01 |
| POSITIVE REGULATION OF SECRETION                                        | GO:0051047 | 124 | -0.10 | -1.31 | 1.42E-01 | 2.58E-01 |

|                                                                  |            |     |       |       |          |          |
|------------------------------------------------------------------|------------|-----|-------|-------|----------|----------|
| NEGATIVE REGULATION OF G1/S TRANSITION OF MITOTIC CELL CYCLE     | GO:2000134 | 47  | -0.16 | -1.31 | 1.41E-01 | 2.58E-01 |
| REGULATION OF NEURON DEATH                                       | GO:1901214 | 114 | -0.11 | -1.31 | 1.53E-01 | 2.58E-01 |
| REGULATION OF ENDOTHELIAL CELL PROLIFERATION                     | GO:0001936 | 65  | -0.14 | -1.32 | 1.50E-01 | 2.57E-01 |
| NEGATIVE REGULATION OF ORGANELLE ASSEMBLY                        | GO:1902116 | 33  | -0.19 | -1.32 | 1.48E-01 | 2.57E-01 |
| CARBOHYDRATE DERIVATIVE CATABOLIC PROCESS                        | GO:1901136 | 106 | -0.11 | -1.32 | 1.62E-01 | 2.57E-01 |
| CEREBRAL CORTEX DEVELOPMENT                                      | GO:0021987 | 30  | -0.20 | -1.32 | 1.65E-01 | 2.57E-01 |
| NEGATIVE REGULATION OF SMALL MOLECULE METABOLIC PROCESS          | GO:0062014 | 44  | -0.17 | -1.32 | 1.66E-01 | 2.56E-01 |
| REGULATION OF OSTEOBLAST DIFFERENTIATION                         | GO:0045667 | 46  | -0.16 | -1.32 | 1.33E-01 | 2.55E-01 |
| POLYSACCHARIDE METABOLIC PROCESS                                 | GO:0005976 | 31  | -0.20 | -1.32 | 1.49E-01 | 2.56E-01 |
| CELLULAR RESPONSE TO LIPOPOLYSACCHARIDE                          | GO:0071222 | 91  | -0.12 | -1.32 | 1.40E-01 | 2.56E-01 |
| CILIUM MOVEMENT                                                  | GO:0003341 | 35  | -0.19 | -1.32 | 1.47E-01 | 2.56E-01 |
| REGULATION OF PLASMA LIPOPROTEIN PARTICLE LEVELS                 | GO:0097006 | 31  | -0.20 | -1.32 | 1.48E-01 | 2.56E-01 |
| CYTOPLASMIC MICROTUBULE ORGANIZATION                             | GO:0031122 | 51  | -0.16 | -1.32 | 1.55E-01 | 2.56E-01 |
| REGULATION OF PEPTIDYL-SERINE PHOSPHORYLATION                    | GO:0033135 | 69  | -0.13 | -1.32 | 1.37E-01 | 2.54E-01 |
| REGULATION OF TRANSPORTER ACTIVITY                               | GO:0032409 | 128 | -0.11 | -1.32 | 1.62E-01 | 2.54E-01 |
| MEIOTIC CELL CYCLE PROCESS                                       | GO:1903046 | 63  | -0.14 | -1.32 | 1.53E-01 | 2.53E-01 |
| REGULATION OF BLOOD CIRCULATION                                  | GO:1903522 | 77  | -0.13 | -1.32 | 1.58E-01 | 2.53E-01 |
| REGULATION OF DNA-TEMPLATED TRANSCRIPTION, ELONGATION            | GO:0032784 | 43  | -0.17 | -1.33 | 1.51E-01 | 2.52E-01 |
| REGULATION OF TRANSMEMBRANE TRANSPORTER ACTIVITY                 | GO:0022898 | 118 | -0.10 | -1.33 | 1.37E-01 | 2.51E-01 |
| SENSORY PERCEPTION OF LIGHT STIMULUS                             | GO:0050953 | 39  | -0.18 | -1.33 | 1.38E-01 | 2.51E-01 |
| CELL JUNCTION ASSEMBLY                                           | GO:0034329 | 100 | -0.11 | -1.33 | 1.52E-01 | 2.51E-01 |
| REGULATION OF CELLULAR PH                                        | GO:0030641 | 49  | -0.16 | -1.33 | 1.48E-01 | 2.52E-01 |
| REGULATION OF CENTROSOME DUPLICATION                             | GO:0010824 | 30  | -0.21 | -1.33 | 1.45E-01 | 2.50E-01 |
| CARBOXYLIC ACID TRANSPORT                                        | GO:0046942 | 84  | -0.12 | -1.33 | 1.43E-01 | 2.50E-01 |
| CELLULAR RESPONSE TO REACTIVE OXYGEN SPECIES                     | GO:0034614 | 66  | -0.14 | -1.33 | 1.56E-01 | 2.50E-01 |
| NEURON MIGRATION                                                 | GO:0001764 | 32  | -0.20 | -1.33 | 1.40E-01 | 2.49E-01 |
| LYMPHOCYTE PROLIFERATION                                         | GO:0046651 | 30  | -0.20 | -1.33 | 1.55E-01 | 2.48E-01 |
| ACTOMYOSIN STRUCTURE ORGANIZATION                                | GO:0031032 | 55  | -0.15 | -1.33 | 1.43E-01 | 2.47E-01 |
| POSITIVE REGULATION OF PROTEIN LOCALIZATION TO CELL PERIPHERY    | GO:1904377 | 44  | -0.17 | -1.33 | 1.41E-01 | 2.47E-01 |
| NEGATIVE REGULATION OF PROTEIN-CONTAINING COMPLEX ASSEMBLY       | GO:0031333 | 78  | -0.13 | -1.34 | 1.37E-01 | 2.46E-01 |
| NEGATIVE REGULATION OF SMALL GTPASE MEDIATED SIGNAL TRANSDUCTION | GO:0051058 | 31  | -0.20 | -1.34 | 1.33E-01 | 2.46E-01 |
| REGULATION OF CELL PROJECTION ASSEMBLY                           | GO:0060491 | 142 | -0.10 | -1.34 | 1.34E-01 | 2.46E-01 |
| POSITIVE REGULATION OF CYSTEINE-TYPE ENDOPEPTIDASE ACTIVITY      | GO:2001056 | 105 | -0.11 | -1.34 | 1.22E-01 | 2.43E-01 |

|                                                                                                 |            |     |       |       |          |          |
|-------------------------------------------------------------------------------------------------|------------|-----|-------|-------|----------|----------|
| SIGNAL TRANSDUCTION IN RESPONSE TO DNA DAMAGE                                                   | GO:0042770 | 104 | -0.11 | -1.34 | 1.37E-01 | 2.43E-01 |
| NEGATIVE REGULATION OF CATION TRANSMEMBRANE TRANSPORT                                           | GO:1904063 | 41  | -0.17 | -1.34 | 1.58E-01 | 2.40E-01 |
| RNA TRANSPORT                                                                                   | GO:0050658 | 81  | -0.13 | -1.35 | 1.30E-01 | 2.39E-01 |
| HISTONE METHYLATION                                                                             | GO:0016571 | 61  | -0.15 | -1.35 | 1.29E-01 | 2.39E-01 |
| REGULATION OF CELLULAR KETONE METABOLIC PROCESS                                                 | GO:0010565 | 66  | -0.14 | -1.35 | 1.35E-01 | 2.40E-01 |
| REGULATION OF CATION TRANSMEMBRANE TRANSPORT                                                    | GO:1904062 | 145 | -0.10 | -1.35 | 1.45E-01 | 2.39E-01 |
| REGULATION OF NUCLEOCYTOPLASMIC TRANSPORT                                                       | GO:0046822 | 64  | -0.14 | -1.35 | 1.13E-01 | 2.37E-01 |
| POSITIVE REGULATION OF TELOMERE MAINTENANCE VIA TELOMERE LENGTHENING                            | GO:1904358 | 32  | -0.20 | -1.35 | 1.27E-01 | 2.36E-01 |
| NEGATIVE REGULATION OF SUPRAMOLECULAR FIBER ORGANIZATION                                        | GO:1902904 | 85  | -0.12 | -1.35 | 1.09E-01 | 2.35E-01 |
| REGULATION OF CELLULAR RESPONSE TO OXIDATIVE STRESS                                             | GO:1900407 | 44  | -0.17 | -1.35 | 1.26E-01 | 2.33E-01 |
| REGULATION OF INTERFERON-GAMMA PRODUCTION                                                       | GO:0032649 | 67  | -0.14 | -1.36 | 1.06E-01 | 2.27E-01 |
| REGULATION OF HEMOPOIESIS                                                                       | GO:1903706 | 200 | -0.08 | -1.36 | 1.36E-01 | 2.27E-01 |
| REGULATION OF DOUBLE-STRAND BREAK REPAIR                                                        | GO:2000779 | 67  | -0.14 | -1.36 | 1.20E-01 | 2.24E-01 |
| NEGATIVE REGULATION OF PROTEOLYSIS                                                              | GO:0045861 | 136 | -0.10 | -1.37 | 1.01E-01 | 2.23E-01 |
| POSITIVE REGULATION OF TRANSMEMBRANE RECEPTOR PROTEIN SERINE/THREONINE KINASE SIGNALING PATHWAY | GO:0090100 | 52  | -0.16 | -1.37 | 1.29E-01 | 2.23E-01 |
| POSITIVE REGULATION OF MITOTIC CELL CYCLE PHASE TRANSITION                                      | GO:1901992 | 53  | -0.16 | -1.37 | 1.09E-01 | 2.23E-01 |
| POSITIVE REGULATION OF CYTOKINE PRODUCTION INVOLVED IN IMMUNE RESPONSE                          | GO:0002720 | 46  | -0.17 | -1.37 | 1.33E-01 | 2.22E-01 |
| DOUBLE-STRAND BREAK REPAIR                                                                      | GO:0006302 | 150 | -0.10 | -1.37 | 1.20E-01 | 2.21E-01 |
| POSITIVE REGULATION OF VIRAL PROCESS                                                            | GO:0048524 | 55  | -0.15 | -1.37 | 1.19E-01 | 2.19E-01 |
| DEVELOPMENTAL PROCESS INVOLVED IN REPRODUCTION                                                  | GO:0003006 | 194 | -0.09 | -1.37 | 1.24E-01 | 2.18E-01 |
| REGULATION OF POSTTRANSCRIPTIONAL GENE SILENCING                                                | GO:0060147 | 30  | -0.21 | -1.37 | 1.14E-01 | 2.18E-01 |
| REGULATION OF JNK CASCADE                                                                       | GO:0046328 | 89  | -0.13 | -1.37 | 1.28E-01 | 2.18E-01 |
| CELL FATE COMMITMENT                                                                            | GO:0045165 | 62  | -0.15 | -1.37 | 1.32E-01 | 2.18E-01 |
| RNA STABILIZATION                                                                               | GO:0043489 | 39  | -0.19 | -1.37 | 1.24E-01 | 2.18E-01 |
| REGULATION OF TRANSCRIPTION FROM RNA POLYMERASE II PROMOTER IN RESPONSE TO STRESS               | GO:0043618 | 37  | -0.19 | -1.38 | 1.08E-01 | 2.18E-01 |
| REGULATION OF BMP SIGNALING PATHWAY                                                             | GO:0030510 | 36  | -0.20 | -1.38 | 9.90E-02 | 2.18E-01 |
| HISTONE ACETYLATION                                                                             | GO:0016573 | 76  | -0.13 | -1.38 | 1.21E-01 | 2.18E-01 |
| NUCLEIC ACID TRANSPORT                                                                          | GO:0050657 | 81  | -0.13 | -1.38 | 1.04E-01 | 2.18E-01 |
| BMP SIGNALING PATHWAY                                                                           | GO:0030509 | 34  | -0.20 | -1.38 | 1.10E-01 | 2.19E-01 |
| NEGATIVE REGULATION OF CYTOKINE PRODUCTION                                                      | GO:0001818 | 161 | -0.09 | -1.38 | 1.02E-01 | 2.18E-01 |
| EXTERNAL ENCAPSULATING STRUCTURE ORGANIZATION                                                   | GO:0045229 | 77  | -0.13 | -1.38 | 1.24E-01 | 2.17E-01 |

|                                                                 |            |     |       |       |          |          |
|-----------------------------------------------------------------|------------|-----|-------|-------|----------|----------|
| POSITIVE REGULATION OF DNA METABOLIC PROCESS                    | GO:0051054 | 145 | -0.10 | -1.38 | 1.06E-01 | 2.17E-01 |
| POSITIVE REGULATION OF MONONUCLEAR CELL MIGRATION               | GO:0071677 | 41  | -0.19 | -1.38 | 1.29E-01 | 2.17E-01 |
| NEGATIVE REGULATION OF EXTRINSIC APOPTOTIC SIGNALING PATHWAY    | GO:2001237 | 51  | -0.16 | -1.38 | 1.30E-01 | 2.17E-01 |
| CELLULAR RESPONSE TO BMP STIMULUS                               | GO:0071773 | 34  | -0.20 | -1.38 | 1.29E-01 | 2.17E-01 |
| RESPONSE TO BMP                                                 | GO:0071772 | 34  | -0.20 | -1.38 | 1.22E-01 | 2.15E-01 |
| REGULATION OF POTASSIUM ION TRANSPORT                           | GO:0043266 | 36  | -0.19 | -1.38 | 1.03E-01 | 2.14E-01 |
| RESPONSE TO HYDROGEN PEROXIDE                                   | GO:0042542 | 48  | -0.17 | -1.38 | 1.09E-01 | 2.14E-01 |
| CELLULAR COMPONENT ASSEMBLY INVOLVED IN MORPHOGENESIS           | GO:0010927 | 34  | -0.20 | -1.38 | 1.25E-01 | 2.13E-01 |
| SPLICEOSOMAL COMPLEX ASSEMBLY                                   | GO:0000245 | 47  | -0.17 | -1.39 | 1.08E-01 | 2.13E-01 |
| REGULATION OF CELL CYCLE G1/S PHASE TRANSITION                  | GO:1902806 | 95  | -0.12 | -1.39 | 9.86E-02 | 2.11E-01 |
| MRNA CATABOLIC PROCESS                                          | GO:0006402 | 110 | -0.11 | -1.39 | 1.23E-01 | 2.11E-01 |
| REGULATION OF I-KAPPAB KINASE/NF-KAPPAB SIGNALING               | GO:0043122 | 192 | -0.09 | -1.39 | 1.13E-01 | 2.11E-01 |
| CENTROSOME CYCLE                                                | GO:0007098 | 68  | -0.14 | -1.39 | 1.09E-01 | 2.10E-01 |
| DEFENSE RESPONSE TO GRAM-POSITIVE BACTERIUM                     | GO:0050830 | 35  | -0.19 | -1.39 | 1.12E-01 | 2.09E-01 |
| REGULATION OF GENE SILENCING BY RNA                             | GO:0060966 | 30  | -0.21 | -1.39 | 1.14E-01 | 2.09E-01 |
| LYSOSOME ORGANIZATION                                           | GO:0007040 | 47  | -0.18 | -1.39 | 1.23E-01 | 2.08E-01 |
| SKELETAL SYSTEM MORPHOGENESIS                                   | GO:0048705 | 36  | -0.19 | -1.39 | 1.15E-01 | 2.09E-01 |
| REGULATION OF SISTER CHROMATID SEGREGATION                      | GO:0033045 | 57  | -0.16 | -1.39 | 1.16E-01 | 2.09E-01 |
| AMINOGLYCAN BIOSYNTHETIC PROCESS                                | GO:0006023 | 48  | -0.17 | -1.39 | 1.22E-01 | 2.09E-01 |
| IN UTERO EMBRYONIC DEVELOPMENT                                  | GO:0001701 | 30  | -0.22 | -1.40 | 1.23E-01 | 2.08E-01 |
| REGULATION OF CARBOHYDRATE CATABOLIC PROCESS                    | GO:0043470 | 33  | -0.20 | -1.40 | 9.26E-02 | 2.04E-01 |
| INTRINSIC APOPTOTIC SIGNALING PATHWAY                           | GO:0097193 | 102 | -0.12 | -1.40 | 1.22E-01 | 2.03E-01 |
| ORGANIC ACID TRANSPORT                                          | GO:0015849 | 102 | -0.12 | -1.40 | 1.02E-01 | 2.02E-01 |
| REGULATION OF OXIDATIVE STRESS-INDUCED CELL DEATH               | GO:1903201 | 38  | -0.19 | -1.40 | 9.72E-02 | 2.01E-01 |
| POSITIVE REGULATION OF LEUKOCYTE CHEMOTAXIS                     | GO:0002690 | 53  | -0.17 | -1.41 | 1.11E-01 | 2.01E-01 |
| REGULATION OF CYSTEINE-TYPE ENDOPEPTIDASE ACTIVITY              | GO:2000116 | 154 | -0.10 | -1.41 | 1.02E-01 | 2.01E-01 |
| RESPONSE TO UNFOLDED PROTEIN                                    | GO:0006986 | 70  | -0.15 | -1.41 | 1.02E-01 | 2.01E-01 |
| MAINTENANCE OF LOCATION IN CELL                                 | GO:0051651 | 64  | -0.15 | -1.41 | 1.01E-01 | 2.01E-01 |
| T CELL RECEPTOR SIGNALING PATHWAY                               | GO:0050852 | 68  | -0.14 | -1.41 | 1.15E-01 | 2.01E-01 |
| REGULATION OF DNA-TEMPLATED TRANSCRIPTION IN RESPONSE TO STRESS | GO:0043620 | 42  | -0.18 | -1.41 | 1.01E-01 | 2.01E-01 |
| INORGANIC ION IMPORT ACROSS PLASMA MEMBRANE                     | GO:0099587 | 34  | -0.21 | -1.41 | 1.14E-01 | 2.00E-01 |
| APOPTOTIC SIGNALING PATHWAY                                     | GO:0097190 | 185 | -0.09 | -1.41 | 9.27E-02 | 2.00E-01 |
| RESPONSE TO CALCIUM ION                                         | GO:0051592 | 58  | -0.16 | -1.41 | 1.13E-01 | 1.97E-01 |



|                                                               |            |     |       |       |          |          |
|---------------------------------------------------------------|------------|-----|-------|-------|----------|----------|
| EPIDERMAL CELL DIFFERENTIATION                                | GO:0009913 | 34  | -0.21 | -1.41 | 1.05E-01 | 1.98E-01 |
| CELLULAR POLYSACCHARIDE METABOLIC PROCESS                     | GO:0044264 | 30  | -0.22 | -1.41 | 8.97E-02 | 1.97E-01 |
| FATTY-ACYL-COA METABOLIC PROCESS                              | GO:0035337 | 31  | -0.21 | -1.41 | 1.04E-01 | 1.96E-01 |
| MICROTUBULE ORGANIZING CENTER ORGANIZATION                    | GO:0031023 | 80  | -0.14 | -1.41 | 1.00E-01 | 1.96E-01 |
| T CELL ACTIVATION                                             | GO:0042110 | 115 | -0.11 | -1.42 | 1.08E-01 | 1.96E-01 |
| MODULATION OF PROCESS OF OTHER ORGANISM                       | GO:0035821 | 76  | -0.14 | -1.42 | 7.84E-02 | 1.96E-01 |
| REGULATION OF PROTEIN PROCESSING                              | GO:0070613 | 30  | -0.22 | -1.42 | 1.03E-01 | 1.96E-01 |
| POSITIVE REGULATION OF LEUKOCYTE MEDIATED CYTOTOXICITY        | GO:0001912 | 33  | -0.20 | -1.42 | 8.50E-02 | 1.96E-01 |
| REGULATION OF ALPHA-BETA T CELL ACTIVATION                    | GO:0046634 | 64  | -0.15 | -1.42 | 8.67E-02 | 1.96E-01 |
| REGULATION OF LEUKOCYTE MIGRATION                             | GO:0002685 | 120 | -0.11 | -1.42 | 9.30E-02 | 1.95E-01 |
| ESTABLISHMENT OF PROTEIN LOCALIZATION TO EXTRACELLULAR REGION | GO:0035592 | 49  | -0.18 | -1.42 | 9.43E-02 | 1.95E-01 |
| RESPONSE TO IONIZING RADIATION                                | GO:0010212 | 81  | -0.13 | -1.42 | 9.68E-02 | 1.94E-01 |
| INORGANIC CATION IMPORT ACROSS PLASMA MEMBRANE                | GO:0098659 | 34  | -0.21 | -1.42 | 1.05E-01 | 1.94E-01 |
| NEGATIVE REGULATION OF CYSTEINE-TYPE ENDOPEPTIDASE ACTIVITY   | GO:2000117 | 50  | -0.17 | -1.42 | 9.76E-02 | 1.92E-01 |
| POSITIVE REGULATION OF I-KAPPAB KINASE/NF-KAPPAB SIGNALING    | GO:0043123 | 145 | -0.10 | -1.43 | 1.08E-01 | 1.91E-01 |
| POSITIVE REGULATION OF MITOTIC CELL CYCLE                     | GO:0045931 | 71  | -0.14 | -1.43 | 9.36E-02 | 1.91E-01 |
| POSITIVE REGULATION OF PEPTIDASE ACTIVITY                     | GO:0010952 | 130 | -0.11 | -1.43 | 8.55E-02 | 1.91E-01 |
| CERAMIDE METABOLIC PROCESS                                    | GO:0006672 | 57  | -0.16 | -1.43 | 8.98E-02 | 1.91E-01 |
| NEGATIVE REGULATION OF LIPID METABOLIC PROCESS                | GO:0045833 | 50  | -0.17 | -1.43 | 9.18E-02 | 1.91E-01 |
| NEGATIVE REGULATION OF NEUROGENESIS                           | GO:0050768 | 47  | -0.18 | -1.43 | 1.06E-01 | 1.91E-01 |
| POSITIVE REGULATION OF ERK1 AND ERK2 CASCADE                  | GO:0070374 | 91  | -0.13 | -1.43 | 9.83E-02 | 1.91E-01 |
| POSITIVE REGULATION OF CELL KILLING                           | GO:0031343 | 39  | -0.20 | -1.43 | 1.12E-01 | 1.91E-01 |
| EXTRINSIC APOPTOTIC SIGNALING PATHWAY                         | GO:0097191 | 60  | -0.16 | -1.43 | 1.16E-01 | 1.91E-01 |
| REGULATION OF CALCIUM ION TRANSMEMBRANE TRANSPORT             | GO:1903169 | 61  | -0.16 | -1.43 | 1.01E-01 | 1.91E-01 |
| CHORDATE EMBRYONIC DEVELOPMENT                                | GO:0043009 | 90  | -0.13 | -1.43 | 9.62E-02 | 1.91E-01 |
| NEGATIVE REGULATION OF GENE EXPRESSION, EPIGENETIC            | GO:0045814 | 30  | -0.22 | -1.43 | 1.06E-01 | 1.90E-01 |
| CELLULAR RESPONSE TO HYPOXIA                                  | GO:0071456 | 57  | -0.16 | -1.43 | 8.51E-02 | 1.90E-01 |
| CELLULAR RESPONSE TO INTERLEUKIN-1                            | GO:0071347 | 45  | -0.18 | -1.43 | 9.70E-02 | 1.90E-01 |
| AXON GUIDANCE                                                 | GO:0007411 | 82  | -0.14 | -1.43 | 1.03E-01 | 1.90E-01 |
| CELL MATURATION                                               | GO:0048469 | 31  | -0.21 | -1.43 | 9.75E-02 | 1.90E-01 |
| NEURON PROJECTION GUIDANCE                                    | GO:0097485 | 82  | -0.14 | -1.43 | 1.07E-01 | 1.89E-01 |
| PATHWAY                                                       | GO:0033143 | 48  | -0.17 | -1.44 | 9.50E-02 | 1.87E-01 |
| VESICLE TRANSPORT ALONG MICROTUBULE                           | GO:0047496 | 33  | -0.21 | -1.44 | 8.79E-02 | 1.86E-01 |

|                                                                                  |            |     |       |       |          |          |
|----------------------------------------------------------------------------------|------------|-----|-------|-------|----------|----------|
| PROTEIN-CONTAINING COMPLEX LOCALIZATION                                          | GO:0031503 | 123 | -0.11 | -1.44 | 8.04E-02 | 1.86E-01 |
| ENDOTHELIUM DEVELOPMENT                                                          | GO:0003158 | 47  | -0.18 | -1.44 | 8.69E-02 | 1.86E-01 |
| LYTIC VACUOLE ORGANIZATION                                                       | GO:0080171 | 47  | -0.18 | -1.44 | 9.15E-02 | 1.85E-01 |
| INTEGRIN-MEDIATED SIGNALING PATHWAY                                              | GO:0007229 | 51  | -0.17 | -1.44 | 1.04E-01 | 1.84E-01 |
| REGULATION OF BLOOD PRESSURE                                                     | GO:0008217 | 53  | -0.17 | -1.44 | 9.16E-02 | 1.83E-01 |
| RESPONSE TO LIPOPOLYSACCHARIDE                                                   | GO:0032496 | 126 | -0.11 | -1.44 | 8.04E-02 | 1.82E-01 |
| O-GLYCAN PROCESSING                                                              | GO:0016266 | 30  | -0.23 | -1.44 | 8.50E-02 | 1.82E-01 |
| REGULATION OF CYSTEINE-TYPE ENDOPEPTIDASE ACTIVITY INVOLVED IN APOPTOTIC PROCESS | GO:0043281 | 134 | -0.11 | -1.45 | 9.70E-02 | 1.82E-01 |
| REGULATION OF CELL SIZE                                                          | GO:0008361 | 77  | -0.14 | -1.45 | 8.65E-02 | 1.82E-01 |
| DNA RECOMBINATION                                                                | GO:0006310 | 123 | -0.11 | -1.45 | 9.98E-02 | 1.82E-01 |
| AMINE METABOLIC PROCESS                                                          | GO:0009308 | 41  | -0.19 | -1.45 | 1.06E-01 | 1.82E-01 |
| SPINDLE ORGANIZATION                                                             | GO:0007051 | 114 | -0.11 | -1.45 | 1.23E-01 | 1.82E-01 |
| ACTIVATION OF PROTEIN KINASE ACTIVITY                                            | GO:0032147 | 68  | -0.15 | -1.45 | 9.07E-02 | 1.81E-01 |
| MYELOID CELL ACTIVATION INVOLVED IN IMMUNE RESPONSE                              | GO:0002275 | 31  | -0.22 | -1.45 | 7.74E-02 | 1.80E-01 |
| MULTICELLULAR ORGANISMAL REPRODUCTIVE PROCESS                                    | GO:0048609 | 165 | -0.10 | -1.45 | 8.58E-02 | 1.80E-01 |
| REGULATION OF PROTEIN LOCALIZATION TO PLASMA MEMBRANE                            | GO:1903076 | 68  | -0.15 | -1.45 | 8.27E-02 | 1.80E-01 |
| CARBOXYLIC ACID TRANSMEMBRANE TRANSPORT                                          | GO:1905039 | 62  | -0.16 | -1.45 | 1.03E-01 | 1.80E-01 |
| POSITIVE REGULATION OF PRODUCTION OF MOLECULAR MEDIATOR OF IMMUNE RESPONSE       | GO:0002702 | 76  | -0.14 | -1.45 | 8.78E-02 | 1.80E-01 |
| CARDIAC CHAMBER DEVELOPMENT                                                      | GO:0003205 | 42  | -0.19 | -1.45 | 7.06E-02 | 1.80E-01 |
| REGULATION OF CD4-POSITIVE, ALPHA-BETA T CELL ACTIVATION                         | GO:2000514 | 46  | -0.18 | -1.45 | 8.96E-02 | 1.80E-01 |
| GERM CELL DEVELOPMENT                                                            | GO:0007281 | 53  | -0.17 | -1.45 | 9.07E-02 | 1.80E-01 |
| REGULATION OF PHOSPHATIDYLINOSITOL 3-KINASE SIGNALING                            | GO:0014066 | 56  | -0.17 | -1.46 | 6.92E-02 | 1.79E-01 |
| CYTOSOLIC CALCIUM ION TRANSPORT                                                  | GO:0060401 | 44  | -0.19 | -1.46 | 8.35E-02 | 1.78E-01 |
| CELL CYCLE PHASE TRANSITION                                                      | GO:0044770 | 123 | -0.11 | -1.46 | 9.56E-02 | 1.77E-01 |
| PROTEIN POLYMERIZATION                                                           | GO:0051258 | 65  | -0.16 | -1.46 | 8.25E-02 | 1.77E-01 |
| CELLULAR RESPONSE TO MOLECULE OF BACTERIAL ORIGIN                                | GO:0071219 | 99  | -0.13 | -1.46 | 8.23E-02 | 1.77E-01 |
| MEMBRANE LIPID METABOLIC PROCESS                                                 | GO:0006643 | 127 | -0.11 | -1.46 | 9.09E-02 | 1.77E-01 |
| LIPID MODIFICATION                                                               | GO:0030258 | 108 | -0.12 | -1.46 | 8.50E-02 | 1.77E-01 |
| EMBRYONIC MORPHOGENESIS                                                          | GO:0048598 | 133 | -0.11 | -1.46 | 9.85E-02 | 1.76E-01 |
| ORGANIC ACID TRANSMEMBRANE TRANSPORT                                             | GO:1903825 | 62  | -0.16 | -1.46 | 7.30E-02 | 1.75E-01 |
| STEROL TRANSPORT                                                                 | GO:0015918 | 36  | -0.20 | -1.46 | 8.65E-02 | 1.76E-01 |

|                                                        |            |     |       |       |          |          |
|--------------------------------------------------------|------------|-----|-------|-------|----------|----------|
| REGULATION OF MRNA PROCESSING                          | GO:0050684 | 104 | -0.12 | -1.46 | 6.68E-02 | 1.74E-01 |
| MESENCHYME DEVELOPMENT                                 | GO:0060485 | 81  | -0.14 | -1.47 | 8.53E-02 | 1.74E-01 |
| ORGANIC ANION TRANSPORT                                | GO:0015711 | 123 | -0.11 | -1.47 | 8.05E-02 | 1.74E-01 |
| CELLULAR CALCIUM ION HOMEOSTASIS                       | GO:0006874 | 177 | -0.09 | -1.47 | 7.39E-02 | 1.73E-01 |
| CALCIUM ION HOMEOSTASIS                                | GO:0055074 | 180 | -0.09 | -1.47 | 7.00E-02 | 1.73E-01 |
| GAMETE GENERATION                                      | GO:0007276 | 151 | -0.10 | -1.47 | 9.18E-02 | 1.73E-01 |
| VISUAL PERCEPTION                                      | GO:0007601 | 37  | -0.20 | -1.47 | 8.96E-02 | 1.74E-01 |
| RESPONSE TO WOUNDING                                   | GO:0009611 | 168 | -0.10 | -1.47 | 6.70E-02 | 1.74E-01 |
| POSITIVE REGULATION OF BINDING                         | GO:0051099 | 100 | -0.12 | -1.47 | 8.47E-02 | 1.73E-01 |
| POSITIVE REGULATION OF ENDOPEPTIDASE ACTIVITY          | GO:0010950 | 124 | -0.11 | -1.47 | 8.14E-02 | 1.72E-01 |
| REGULATION OF SIGNALING RECEPTOR ACTIVITY              | GO:0010469 | 71  | -0.15 | -1.47 | 7.66E-02 | 1.72E-01 |
| PROTEIN LOCALIZATION TO EXTRACELLULAR REGION           | GO:0071692 | 53  | -0.17 | -1.47 | 7.17E-02 | 1.72E-01 |
| NEGATIVE REGULATION OF AUTOPHAGY                       | GO:0010507 | 55  | -0.17 | -1.47 | 7.88E-02 | 1.72E-01 |
| NEGATIVE REGULATION OF RNA CATABOLIC PROCESS           | GO:1902369 | 47  | -0.18 | -1.47 | 8.73E-02 | 1.71E-01 |
| NEGATIVE REGULATION OF EPITHELIAL CELL PROLIFERATION   | GO:0050680 | 47  | -0.19 | -1.47 | 8.00E-02 | 1.71E-01 |
| RESPONSE TO HYPOXIA                                    | GO:0001666 | 99  | -0.13 | -1.48 | 8.06E-02 | 1.70E-01 |
| WNT SIGNALING PATHWAY                                  | GO:0016055 | 61  | -0.16 | -1.48 | 6.56E-02 | 1.69E-01 |
| NEGATIVE REGULATION OF NEURON APOPTOTIC PROCESS        | GO:0043524 | 33  | -0.22 | -1.48 | 7.71E-02 | 1.69E-01 |
| POSITIVE REGULATION OF CANONICAL WNT SIGNALING PATHWAY | GO:0090263 | 61  | -0.16 | -1.48 | 7.47E-02 | 1.68E-01 |
| REGULATION OF RESPONSE TO OXIDATIVE STRESS             | GO:1902882 | 49  | -0.18 | -1.48 | 8.47E-02 | 1.67E-01 |
| MRNA 3'-END PROCESSING                                 | GO:0031124 | 40  | -0.20 | -1.48 | 7.56E-02 | 1.67E-01 |
| EYE MORPHOGENESIS                                      | GO:0048592 | 32  | -0.22 | -1.48 | 7.28E-02 | 1.66E-01 |
| POSITIVE REGULATION OF RESPONSE TO CYTOKINE STIMULUS   | GO:0060760 | 33  | -0.22 | -1.48 | 8.54E-02 | 1.66E-01 |
| CHROMOSOME SEGREGATION                                 | GO:0007059 | 170 | -0.10 | -1.48 | 7.20E-02 | 1.66E-01 |
| CYTOSKELETON-DEPENDENT CYTOKINESIS                     | GO:0061640 | 66  | -0.16 | -1.48 | 7.32E-02 | 1.66E-01 |
| CELL DIVISION                                          | GO:0051301 | 103 | -0.13 | -1.48 | 7.85E-02 | 1.66E-01 |
| CYTOKINESIS                                            | GO:0000910 | 68  | -0.15 | -1.48 | 7.45E-02 | 1.66E-01 |
| POSITIVE REGULATION OF ION TRANSPORT                   | GO:0043270 | 98  | -0.13 | -1.49 | 6.57E-02 | 1.66E-01 |
| RIBONUCLEOSIDE BISPHOSPHATE BIOSYNTHETIC PROCESS       | GO:0034030 | 43  | -0.19 | -1.49 | 6.80E-02 | 1.66E-01 |
| POSITIVE REGULATION OF LYMPHOCYTE MEDIATED IMMUNITY    | GO:0002708 | 67  | -0.15 | -1.49 | 6.30E-02 | 1.66E-01 |
| ERAD PATHWAY                                           | GO:0036503 | 82  | -0.14 | -1.49 | 9.26E-02 | 1.65E-01 |
| SENSORY ORGAN DEVELOPMENT                              | GO:0007423 | 107 | -0.12 | -1.49 | 6.26E-02 | 1.65E-01 |
| PROTEIN SECRETION                                      | GO:0009306 | 49  | -0.18 | -1.49 | 6.13E-02 | 1.64E-01 |

|                                                                                                                                                  |            |     |       |       |          |          |
|--------------------------------------------------------------------------------------------------------------------------------------------------|------------|-----|-------|-------|----------|----------|
| WOUND HEALING                                                                                                                                    | GO:0042060 | 141 | -0.11 | -1.49 | 7.72E-02 | 1.63E-01 |
| NEGATIVE REGULATION OF NERVOUS SYSTEM DEVELOPMENT                                                                                                | GO:0051961 | 49  | -0.18 | -1.49 | 7.54E-02 | 1.63E-01 |
| POSITIVE REGULATION OF PHOSPHATIDYLINOSITOL 3-KINASE SIGNALING                                                                                   | GO:0014068 | 39  | -0.20 | -1.49 | 7.52E-02 | 1.63E-01 |
| REGULATION OF ION TRANSMEMBRANE TRANSPORTER ACTIVITY                                                                                             | GO:0032412 | 114 | -0.12 | -1.49 | 6.46E-02 | 1.63E-01 |
| REGULATION OF CELLULAR PROTEIN CATABOLIC PROCESS                                                                                                 | GO:1903362 | 191 | -0.09 | -1.50 | 7.06E-02 | 1.61E-01 |
| POSITIVE REGULATION OF ADAPTIVE IMMUNE RESPONSE BASED ON SOMATIC RECOMBINATION OF IMMUNE RECEPTORS BUILT FROM IMMUNOGLOBULIN SUPERFAMILY DOMAINS | GO:0002824 | 62  | -0.16 | -1.50 | 7.44E-02 | 1.61E-01 |
| MITOTIC SISTER CHROMATID SEGREGATION                                                                                                             | GO:0000070 | 88  | -0.14 | -1.50 | 5.97E-02 | 1.61E-01 |
| RESPONSE TO INTERLEUKIN-1                                                                                                                        | GO:0070555 | 60  | -0.17 | -1.50 | 8.51E-02 | 1.61E-01 |
| NUCLEOSIDE BIPHOSPHATE BIOSYNTHETIC PROCESS                                                                                                      | GO:0033866 | 43  | -0.19 | -1.50 | 9.04E-02 | 1.61E-01 |
| POSITIVE REGULATION OF ADAPTIVE IMMUNE RESPONSE                                                                                                  | GO:0002821 | 68  | -0.16 | -1.50 | 8.50E-02 | 1.61E-01 |
| NEGATIVE REGULATION OF TRANSMEMBRANE TRANSPORT                                                                                                   | GO:0034763 | 59  | -0.16 | -1.50 | 6.49E-02 | 1.61E-01 |
| ACYL-COA BIOSYNTHETIC PROCESS                                                                                                                    | GO:0071616 | 30  | -0.23 | -1.50 | 7.52E-02 | 1.61E-01 |
| NEGATIVE REGULATION OF CELL DEVELOPMENT                                                                                                          | GO:0010721 | 66  | -0.15 | -1.50 | 7.44E-02 | 1.61E-01 |
| DNA-DEPENDENT DNA REPLICATION MAINTENANCE OF FIDELITY                                                                                            | GO:0045005 | 40  | -0.20 | -1.50 | 7.17E-02 | 1.60E-01 |
| MRNA TRANSPORT                                                                                                                                   | GO:0051028 | 50  | -0.18 | -1.50 | 7.54E-02 | 1.59E-01 |
| REGULATION OF RAS PROTEIN SIGNAL TRANSDUCTION                                                                                                    | GO:0046578 | 102 | -0.13 | -1.50 | 5.77E-02 | 1.59E-01 |
| TISSUE HOMEOSTASIS                                                                                                                               | GO:0001894 | 81  | -0.14 | -1.50 | 7.07E-02 | 1.60E-01 |
| NEGATIVE REGULATION OF ION TRANSMEMBRANE TRANSPORT                                                                                               | GO:0034766 | 45  | -0.19 | -1.50 | 6.58E-02 | 1.60E-01 |
| THIOESTER BIOSYNTHETIC PROCESS                                                                                                                   | GO:0035384 | 30  | -0.23 | -1.50 | 5.08E-02 | 1.60E-01 |
| NEGATIVE REGULATION OF PEPTIDASE ACTIVITY                                                                                                        | GO:0010466 | 78  | -0.14 | -1.50 | 8.08E-02 | 1.59E-01 |
| REGULATION OF NITRIC OXIDE METABOLIC PROCESS                                                                                                     | GO:0080164 | 34  | -0.22 | -1.50 | 6.88E-02 | 1.59E-01 |
| TRANSITION METAL ION TRANSPORT                                                                                                                   | GO:0000041 | 51  | -0.18 | -1.50 | 5.79E-02 | 1.60E-01 |
| AMINO SUGAR METABOLIC PROCESS                                                                                                                    | GO:0006040 | 30  | -0.23 | -1.51 | 6.67E-02 | 1.57E-01 |
| PALLIUM DEVELOPMENT                                                                                                                              | GO:0021543 | 35  | -0.22 | -1.51 | 7.69E-02 | 1.56E-01 |
| REGULATION OF LEUKOCYTE CELL-CELL ADHESION                                                                                                       | GO:1903037 | 200 | -0.09 | -1.51 | 7.59E-02 | 1.56E-01 |
| REGULATION OF LYMPHOCYTE MIGRATION                                                                                                               | GO:2000401 | 38  | -0.21 | -1.52 | 7.54E-02 | 1.53E-01 |
| NEGATIVE REGULATION OF MITOTIC CELL CYCLE                                                                                                        | GO:0045930 | 136 | -0.11 | -1.52 | 6.35E-02 | 1.53E-01 |
| MONONUCLEAR CELL MIGRATION                                                                                                                       | GO:0071674 | 54  | -0.17 | -1.52 | 8.63E-02 | 1.53E-01 |
| NEGATIVE REGULATION OF CELL CYCLE PHASE TRANSITION                                                                                               | GO:1901988 | 143 | -0.11 | -1.52 | 6.65E-02 | 1.53E-01 |
| MICROTUBULE POLYMERIZATION OR DEPOLYMERIZATION                                                                                                   | GO:0031109 | 39  | -0.20 | -1.52 | 7.10E-02 | 1.52E-01 |
| POSITIVE REGULATION OF MAP KINASE ACTIVITY                                                                                                       | GO:0043406 | 62  | -0.17 | -1.52 | 7.19E-02 | 1.50E-01 |

|                                                                  |            |     |       |       |          |          |
|------------------------------------------------------------------|------------|-----|-------|-------|----------|----------|
| MITOTIC CYTOKINESIS                                              | GO:0000281 | 51  | -0.18 | -1.52 | 5.97E-02 | 1.50E-01 |
| REGULATION OF SYSTEM PROCESS                                     | GO:0044057 | 169 | -0.10 | -1.52 | 6.10E-02 | 1.50E-01 |
| POSITIVE REGULATION OF CHROMOSOME ORGANIZATION                   | GO:2001252 | 71  | -0.15 | -1.52 | 4.75E-02 | 1.49E-01 |
| MRNA STABILIZATION                                               | GO:0048255 | 30  | -0.23 | -1.53 | 6.48E-02 | 1.47E-01 |
| PURINE NUCLEOSIDE BISPHOSPHATE BIOSYNTHETIC PROCESS              | GO:0034033 | 43  | -0.19 | -1.53 | 6.92E-02 | 1.47E-01 |
| CELL-CELL SIGNALING BY WNT                                       | GO:0198738 | 63  | -0.17 | -1.53 | 6.27E-02 | 1.47E-01 |
| CELL-SUBSTRATE ADHESION                                          | GO:0031589 | 83  | -0.15 | -1.53 | 6.80E-02 | 1.48E-01 |
| REGULATION OF NEURON APOPTOTIC PROCESS                           | GO:0043523 | 57  | -0.17 | -1.53 | 6.57E-02 | 1.48E-01 |
| CELLULAR RESPONSE TO DECREASED OXYGEN LEVELS                     | GO:0036294 | 60  | -0.17 | -1.53 | 5.91E-02 | 1.47E-01 |
| PEPTIDYL-LYSINE MODIFICATION                                     | GO:0018205 | 195 | -0.10 | -1.53 | 5.48E-02 | 1.47E-01 |
| CERAMIDE BIOSYNTHETIC PROCESS                                    | GO:0046513 | 33  | -0.22 | -1.53 | 6.45E-02 | 1.47E-01 |
| HOMEOSTASIS OF NUMBER OF CELLS                                   | GO:0048872 | 81  | -0.14 | -1.53 | 5.03E-02 | 1.47E-01 |
| DENDRITE DEVELOPMENT                                             | GO:0016358 | 37  | -0.21 | -1.53 | 5.25E-02 | 1.48E-01 |
| REGULATION OF STRESS-ACTIVATED MAPK CASCADE                      | GO:0032872 | 124 | -0.12 | -1.53 | 7.50E-02 | 1.45E-01 |
| NEGATIVE REGULATION OF CELL CYCLE PROCESS                        | GO:0010948 | 171 | -0.10 | -1.54 | 7.94E-02 | 1.45E-01 |
| ESTABLISHMENT OF RNA LOCALIZATION                                | GO:0051236 | 83  | -0.14 | -1.54 | 4.98E-02 | 1.44E-01 |
| MEIOTIC CELL CYCLE                                               | GO:0051321 | 78  | -0.15 | -1.54 | 5.89E-02 | 1.44E-01 |
| CHOLESTEROL TRANSPORT                                            | GO:0030301 | 35  | -0.22 | -1.54 | 6.76E-02 | 1.43E-01 |
| NEGATIVE REGULATION OF CELL PROJECTION ORGANIZATION              | GO:0031345 | 77  | -0.15 | -1.54 | 6.45E-02 | 1.43E-01 |
| CELLULAR DIVALENT INORGANIC CATION HOMEOSTASIS                   | GO:0072503 | 195 | -0.09 | -1.54 | 5.61E-02 | 1.42E-01 |
| REGULATION OF EPIDERMAL GROWTH FACTOR RECEPTOR SIGNALING PATHWAY | GO:0042058 | 49  | -0.19 | -1.54 | 5.10E-02 | 1.42E-01 |
| LEUKOCYTE DIFFERENTIATION                                        | GO:0002521 | 167 | -0.10 | -1.54 | 4.92E-02 | 1.42E-01 |
| REGULATION OF JUN KINASE ACTIVITY                                | GO:0043506 | 32  | -0.23 | -1.54 | 6.07E-02 | 1.42E-01 |
| ORGANELLE FUSION                                                 | GO:0048284 | 83  | -0.14 | -1.54 | 5.59E-02 | 1.42E-01 |
| CELLULAR MONOVALENT INORGANIC CATION HOMEOSTASIS                 | GO:0030004 | 58  | -0.17 | -1.54 | 6.34E-02 | 1.42E-01 |
| NEGATIVE REGULATION OF MITOTIC CELL CYCLE PHASE TRANSITION       | GO:1901991 | 108 | -0.13 | -1.54 | 5.10E-02 | 1.42E-01 |
| EMBRYO DEVELOPMENT ENDING IN BIRTH OR EGG HATCHING               | GO:0009792 | 94  | -0.14 | -1.55 | 6.15E-02 | 1.41E-01 |
| REGULATION OF NITRIC OXIDE BIOSYNTHETIC PROCESS                  | GO:0045428 | 32  | -0.22 | -1.55 | 7.26E-02 | 1.41E-01 |
| STRESS-ACTIVATED MAPK CASCADE                                    | GO:0051403 | 38  | -0.22 | -1.55 | 6.41E-02 | 1.40E-01 |
| NUCLEAR-TRANSCRIBED MRNA CATABOLIC PROCESS                       | GO:0000956 | 89  | -0.14 | -1.55 | 6.18E-02 | 1.39E-01 |
| NEUTROPHIL CHEMOTAXIS                                            | GO:0030593 | 36  | -0.22 | -1.55 | 6.00E-02 | 1.39E-01 |
| REGULATION OF DNA REPAIR                                         | GO:0006282 | 103 | -0.13 | -1.55 | 5.28E-02 | 1.39E-01 |
| NEGATIVE REGULATION OF INFLAMMATORY RESPONSE                     | GO:0050728 | 68  | -0.16 | -1.55 | 5.20E-02 | 1.39E-01 |

|                                                     |            |     |       |       |          |          |
|-----------------------------------------------------|------------|-----|-------|-------|----------|----------|
| REGULATION OF SYNAPSE STRUCTURE OR ACTIVITY         | GO:0050803 | 71  | -0.16 | -1.55 | 4.98E-02 | 1.39E-01 |
| MAINTENANCE OF PROTEIN LOCALIZATION IN ORGANELLE    | GO:0072595 | 33  | -0.23 | -1.55 | 5.14E-02 | 1.38E-01 |
| NUCLEUS ORGANIZATION                                | GO:0006997 | 88  | -0.14 | -1.55 | 5.13E-02 | 1.39E-01 |
| CELLULAR DEFENSE RESPONSE                           | GO:0006968 | 35  | -0.22 | -1.56 | 4.89E-02 | 1.38E-01 |
| MULTICELLULAR ORGANISM REPRODUCTION                 | GO:0032504 | 170 | -0.10 | -1.56 | 4.65E-02 | 1.35E-01 |
| RESPONSE TO STEROID HORMONE                         | GO:0048545 | 64  | -0.17 | -1.56 | 3.76E-02 | 1.33E-01 |
| ANATOMICAL STRUCTURE HOMEOSTASIS                    | GO:0060249 | 99  | -0.13 | -1.57 | 5.78E-02 | 1.32E-01 |
| NEGATIVE REGULATION OF TRANSPORTER ACTIVITY         | GO:0032410 | 40  | -0.21 | -1.57 | 5.79E-02 | 1.30E-01 |
| POSITIVE REGULATION OF TRANSPORTER ACTIVITY         | GO:0032411 | 53  | -0.19 | -1.57 | 5.68E-02 | 1.30E-01 |
| REGULATION OF CIRCADIAN RHYTHM                      | GO:0042752 | 71  | -0.16 | -1.57 | 5.08E-02 | 1.30E-01 |
| GLYCOSYLATION                                       | GO:0070085 | 144 | -0.11 | -1.57 | 4.35E-02 | 1.30E-01 |
| REGULATION OF LEUKOCYTE DEGRANULATION               | GO:0043300 | 30  | -0.24 | -1.57 | 6.08E-02 | 1.30E-01 |
| REGULATION OF MYELOID CELL DIFFERENTIATION          | GO:0045637 | 107 | -0.13 | -1.57 | 3.99E-02 | 1.29E-01 |
| RESPONSE TO OXYGEN LEVELS                           | GO:0070482 | 114 | -0.12 | -1.58 | 5.24E-02 | 1.28E-01 |
| TRANSPORT ACROSS BLOOD-BRAIN BARRIER                | GO:0150104 | 52  | -0.19 | -1.58 | 5.22E-02 | 1.27E-01 |
| REGULATION OF INSULIN RECEPTOR SIGNALING PATHWAY    | GO:0046626 | 34  | -0.23 | -1.58 | 5.30E-02 | 1.26E-01 |
| RESPONSE TO TUMOR NECROSIS FACTOR                   | GO:0034612 | 96  | -0.14 | -1.58 | 6.53E-02 | 1.25E-01 |
| ENDOPLASMIC RETICULUM UNFOLDED PROTEIN RESPONSE     | GO:0030968 | 33  | -0.23 | -1.58 | 5.16E-02 | 1.24E-01 |
| REGULATION OF EMBRYONIC DEVELOPMENT                 | GO:0045995 | 30  | -0.24 | -1.58 | 4.50E-02 | 1.25E-01 |
| POSITIVE REGULATION OF ORGANELLE ASSEMBLY           | GO:1902117 | 49  | -0.19 | -1.58 | 4.93E-02 | 1.25E-01 |
| SPHINGOLIPID BIOSYNTHETIC PROCESS                   | GO:0030148 | 58  | -0.18 | -1.58 | 4.17E-02 | 1.25E-01 |
| PROTEIN MONOUBIQUITINATION                          | GO:0006513 | 52  | -0.19 | -1.58 | 5.31E-02 | 1.24E-01 |
| REGULATION OF TUBE DIAMETER                         | GO:0035296 | 32  | -0.24 | -1.58 | 4.09E-02 | 1.24E-01 |
| REGULATION OF CANONICAL WNT SIGNALING PATHWAY       | GO:0060828 | 135 | -0.12 | -1.59 | 6.20E-02 | 1.24E-01 |
| AUTOPHAGY                                           | GO:0006914 | 165 | -0.11 | -1.59 | 4.44E-02 | 1.24E-01 |
| REGULATION OF G1/S TRANSITION OF MITOTIC CELL CYCLE | GO:2000045 | 80  | -0.15 | -1.59 | 3.93E-02 | 1.22E-01 |
| PROCESS UTILIZING AUTOPHAGIC MECHANISM              | GO:0061919 | 165 | -0.11 | -1.59 | 4.26E-02 | 1.21E-01 |
| RESPONSE TO DECREASED OXYGEN LEVELS                 | GO:0036293 | 102 | -0.14 | -1.60 | 5.92E-02 | 1.20E-01 |
| REGULATION OF CHROMOSOME ORGANIZATION               | GO:0033044 | 160 | -0.11 | -1.60 | 5.47E-02 | 1.19E-01 |
| B CELL ACTIVATION                                   | GO:0042113 | 84  | -0.15 | -1.60 | 5.71E-02 | 1.19E-01 |
| CIRCADIAN REGULATION OF GENE EXPRESSION             | GO:0032922 | 52  | -0.19 | -1.60 | 5.59E-02 | 1.19E-01 |
| EYE DEVELOPMENT                                     | GO:0001654 | 79  | -0.15 | -1.60 | 4.10E-02 | 1.19E-01 |
| VESICLE CYTOSKELETAL TRAFFICKING                    | GO:0099518 | 50  | -0.19 | -1.60 | 4.33E-02 | 1.18E-01 |

|                                                                          |            |     |       |       |          |          |
|--------------------------------------------------------------------------|------------|-----|-------|-------|----------|----------|
| REGULATION OF TUBE SIZE                                                  | GO:0035150 | 32  | -0.24 | -1.60 | 5.77E-02 | 1.18E-01 |
| REGULATION OF PROTEOLYSIS INVOLVED IN CELLULAR PROTEIN CATABOLIC PROCESS | GO:1903050 | 167 | -0.11 | -1.60 | 3.98E-02 | 1.18E-01 |
| AXONAL TRANSPORT                                                         | GO:0098930 | 41  | -0.21 | -1.60 | 4.62E-02 | 1.17E-01 |
| NEGATIVE REGULATION OF ION TRANSMEMBRANE TRANSPORTER ACTIVITY            | GO:0032413 | 34  | -0.23 | -1.61 | 5.27E-02 | 1.15E-01 |
| ESTABLISHMENT OF SPINDLE LOCALIZATION                                    | GO:0051293 | 30  | -0.25 | -1.61 | 3.68E-02 | 1.16E-01 |
| MAINTENANCE OF PROTEIN LOCATION                                          | GO:0045185 | 68  | -0.17 | -1.61 | 4.14E-02 | 1.15E-01 |
| REGULATION OF SYNAPSE ORGANIZATION                                       | GO:0050807 | 69  | -0.16 | -1.61 | 4.22E-02 | 1.15E-01 |
| NEGATIVE REGULATION OF CYTOSKELETON ORGANIZATION                         | GO:0051494 | 85  | -0.15 | -1.61 | 5.05E-02 | 1.14E-01 |
| EXOCYTIC PROCESS                                                         | GO:0140029 | 37  | -0.23 | -1.61 | 3.15E-02 | 1.13E-01 |
| REGULATION OF ENDOPEPTIDASE ACTIVITY                                     | GO:0052548 | 199 | -0.10 | -1.62 | 4.66E-02 | 1.11E-01 |
| NEUTROPHIL MIGRATION                                                     | GO:1990266 | 37  | -0.23 | -1.62 | 4.61E-02 | 1.11E-01 |
| EXPORT FROM CELL                                                         | GO:0140352 | 185 | -0.10 | -1.62 | 4.23E-02 | 1.11E-01 |
| POSITIVE REGULATION OF COLD-INDUCED THERMOGENESIS                        | GO:0120162 | 62  | -0.17 | -1.62 | 4.41E-02 | 1.11E-01 |
| ORGANIC HYDROXY COMPOUND TRANSPORT                                       | GO:0015850 | 59  | -0.17 | -1.62 | 5.05E-02 | 1.11E-01 |
| RESPONSE TO OSMOTIC STRESS                                               | GO:0006970 | 30  | -0.25 | -1.62 | 3.81E-02 | 1.11E-01 |
| REGULATION OF MICROTUBULE-BASED PROCESS                                  | GO:0032886 | 144 | -0.12 | -1.62 | 2.62E-02 | 1.11E-01 |
| VASCULAR TRANSPORT                                                       | GO:0010232 | 52  | -0.19 | -1.62 | 3.75E-02 | 1.11E-01 |
| REGULATION OF DENDRITE DEVELOPMENT                                       | GO:0050773 | 36  | -0.23 | -1.62 | 3.77E-02 | 1.10E-01 |
| POSITIVE REGULATION OF EPITHELIAL CELL MIGRATION                         | GO:0010634 | 98  | -0.14 | -1.62 | 3.55E-02 | 1.10E-01 |
| MUCOPOLYSACCHARIDE METABOLIC PROCESS                                     | GO:1903510 | 39  | -0.22 | -1.62 | 4.42E-02 | 1.09E-01 |
| NUCLEOBASE-CONTAINING COMPOUND TRANSPORT                                 | GO:0015931 | 111 | -0.13 | -1.63 | 2.70E-02 | 1.09E-01 |
| POSITIVE REGULATION OF NERVOUS SYSTEM DEVELOPMENT                        | GO:0051962 | 93  | -0.15 | -1.63 | 3.67E-02 | 1.09E-01 |
| REGULATION OF INTERFERON-BETA PRODUCTION                                 | GO:0032648 | 48  | -0.20 | -1.63 | 4.99E-02 | 1.08E-01 |
| SPINDLE LOCALIZATION                                                     | GO:0051653 | 30  | -0.25 | -1.63 | 4.41E-02 | 1.08E-01 |
| REGULATION OF CHROMATIN ORGANIZATION                                     | GO:1902275 | 30  | -0.25 | -1.63 | 3.86E-02 | 1.07E-01 |
| POSITIVE REGULATION OF FAT CELL DIFFERENTIATION                          | GO:0045600 | 33  | -0.24 | -1.63 | 4.41E-02 | 1.06E-01 |
| POTASSIUM ION TRANSMEMBRANE TRANSPORT                                    | GO:0071805 | 45  | -0.20 | -1.63 | 3.37E-02 | 1.06E-01 |
| MYELOID LEUKOCYTE MIGRATION                                              | GO:0097529 | 54  | -0.19 | -1.63 | 2.64E-02 | 1.06E-01 |
| REGULATION OF EPITHELIAL CELL PROLIFERATION                              | GO:0050678 | 128 | -0.12 | -1.64 | 2.39E-02 | 1.05E-01 |
| BLOOD VESSEL DIAMETER MAINTENANCE                                        | GO:0097746 | 32  | -0.24 | -1.64 | 4.40E-02 | 1.04E-01 |
| DEVELOPMENTAL MATURATION                                                 | GO:0021700 | 65  | -0.17 | -1.64 | 4.91E-02 | 1.03E-01 |
| EPIDERMIS DEVELOPMENT                                                    | GO:0008544 | 59  | -0.18 | -1.64 | 2.27E-02 | 1.03E-01 |
| ANTERIOR/POSTERIOR PATTERN SPECIFICATION                                 | GO:0009952 | 34  | -0.23 | -1.64 | 4.73E-02 | 1.03E-01 |



|                                                                 |            |     |       |       |          |          |
|-----------------------------------------------------------------|------------|-----|-------|-------|----------|----------|
| ENDOPLASMIC RETICULUM ORGANIZATION                              | GO:0007029 | 65  | -0.18 | -1.64 | 4.61E-02 | 1.03E-01 |
| REGULATION OF MICROTUBULE CYTOSKELETON ORGANIZATION             | GO:0070507 | 99  | -0.14 | -1.64 | 3.87E-02 | 1.03E-01 |
| CELLULAR RESPONSE TO HYDROGEN PEROXIDE                          | GO:0070301 | 34  | -0.24 | -1.64 | 3.07E-02 | 1.03E-01 |
| POSITIVE REGULATION OF MACROAUTOPHAGY                           | GO:0016239 | 45  | -0.21 | -1.65 | 3.75E-02 | 1.02E-01 |
| MULTI-ORGANISM REPRODUCTIVE PROCESS                             | GO:0044703 | 197 | -0.10 | -1.65 | 3.34E-02 | 1.02E-01 |
| REGULATION OF INTERLEUKIN-10 PRODUCTION                         | GO:0032653 | 38  | -0.22 | -1.65 | 3.91E-02 | 1.02E-01 |
| PROTEIN LOCALIZATION TO CYTOSKELETON                            | GO:0044380 | 30  | -0.25 | -1.65 | 5.19E-02 | 1.02E-01 |
| TRANSCRIPTION BY RNA POLYMERASE II                              | GO:0006366 | 160 | -0.11 | -1.65 | 3.30E-02 | 1.02E-01 |
| DEMETHYLATION                                                   | GO:0070988 | 44  | -0.21 | -1.65 | 3.41E-02 | 1.01E-01 |
| POSITIVE REGULATION OF PROTEASOMAL PROTEIN CATABOLIC PROCESS    | GO:1901800 | 85  | -0.15 | -1.65 | 3.02E-02 | 1.00E-01 |
| CELL AGING                                                      | GO:0007569 | 48  | -0.20 | -1.65 | 3.22E-02 | 1.00E-01 |
| MICROTUBULE POLYMERIZATION                                      | GO:0046785 | 31  | -0.25 | -1.65 | 4.41E-02 | 9.97E-02 |
| SECRETION BY CELL                                               | GO:0032940 | 161 | -0.11 | -1.65 | 2.36E-02 | 9.94E-02 |
| POSITIVE REGULATION OF NEURON DEATH                             | GO:1901216 | 39  | -0.22 | -1.65 | 2.12E-02 | 9.95E-02 |
| REGULATION OF GLUCOSE TRANSMEMBRANE TRANSPORT                   | GO:0010827 | 32  | -0.25 | -1.66 | 3.11E-02 | 9.95E-02 |
| GRANULOCYTE MIGRATION                                           | GO:0097530 | 40  | -0.22 | -1.66 | 3.33E-02 | 9.91E-02 |
| POSITIVE REGULATION OF AUTOPHAGY                                | GO:0010508 | 95  | -0.14 | -1.66 | 3.68E-02 | 9.91E-02 |
| REGULATION OF HISTONE METHYLATION                               | GO:0031060 | 38  | -0.22 | -1.66 | 3.36E-02 | 9.92E-02 |
| SPHINGOLIPID METABOLIC PROCESS                                  | GO:0006665 | 90  | -0.15 | -1.66 | 3.50E-02 | 9.87E-02 |
| AXONOGENESIS                                                    | GO:0007409 | 130 | -0.13 | -1.66 | 2.92E-02 | 9.78E-02 |
| MAPK CASCADE                                                    | GO:0000165 | 90  | -0.15 | -1.66 | 2.40E-02 | 9.78E-02 |
| REGULATION OF STRESS-ACTIVATED PROTEIN KINASE SIGNALING CASCADE | GO:0070302 | 126 | -0.13 | -1.66 | 2.24E-02 | 9.77E-02 |
| REGULATION OF UBIQUITIN-DEPENDENT PROTEIN CATABOLIC PROCESS     | GO:2000058 | 129 | -0.13 | -1.66 | 3.72E-02 | 9.75E-02 |
| REGULATION OF AXONOGENESIS                                      | GO:0050770 | 61  | -0.18 | -1.66 | 3.02E-02 | 9.75E-02 |
| PROTEIN GLYCOSYLATION                                           | GO:0006486 | 131 | -0.13 | -1.66 | 3.08E-02 | 9.77E-02 |
| CALCIUM ION TRANSPORT INTO CYTOSOL                              | GO:0060402 | 32  | -0.25 | -1.67 | 2.30E-02 | 9.71E-02 |
| LEUKOCYTE ACTIVATION INVOLVED IN IMMUNE RESPONSE                | GO:0002366 | 80  | -0.16 | -1.67 | 3.54E-02 | 9.69E-02 |
| POSITIVE REGULATION OF CELLULAR PROTEIN CATABOLIC PROCESS       | GO:1903364 | 113 | -0.13 | -1.67 | 4.76E-02 | 9.62E-02 |
| MACROMOLECULE GLYCOSYLATION                                     | GO:0043413 | 131 | -0.13 | -1.67 | 2.23E-02 | 9.54E-02 |
| NEGATIVE REGULATION OF ENDOPEPTIDASE ACTIVITY                   | GO:0010951 | 72  | -0.17 | -1.67 | 2.69E-02 | 9.53E-02 |
| POSITIVE REGULATION OF LEUKOCYTE MEDIATED IMMUNITY              | GO:0002705 | 82  | -0.15 | -1.67 | 2.71E-02 | 9.48E-02 |
| ACTIVATION OF GTPASE ACTIVITY                                   | GO:0090630 | 73  | -0.17 | -1.67 | 2.56E-02 | 9.50E-02 |
| POSITIVE REGULATION OF NEUROGENESIS                             | GO:0050769 | 80  | -0.16 | -1.67 | 2.62E-02 | 9.52E-02 |

|                                                                         |            |     |       |       |          |          |
|-------------------------------------------------------------------------|------------|-----|-------|-------|----------|----------|
| EPITHELIAL CELL DIFFERENTIATION                                         | GO:0030855 | 166 | -0.11 | -1.67 | 3.10E-02 | 9.46E-02 |
| CELL SURFACE RECEPTOR SIGNALING PATHWAY INVOLVED IN CELL-CELL SIGNALING | GO:1905114 | 71  | -0.17 | -1.67 | 2.40E-02 | 9.45E-02 |
| MONONUCLEAR CELL DIFFERENTIATION                                        | GO:1903131 | 129 | -0.12 | -1.68 | 3.70E-02 | 9.38E-02 |
| TELENCEPHALON DEVELOPMENT                                               | GO:0021537 | 53  | -0.20 | -1.68 | 2.85E-02 | 9.32E-02 |
| REGULATION OF LEUKOCYTE CHEMOTAXIS                                      | GO:0002688 | 71  | -0.17 | -1.68 | 2.94E-02 | 9.31E-02 |
| B CELL DIFFERENTIATION                                                  | GO:0030183 | 50  | -0.20 | -1.68 | 2.14E-02 | 9.29E-02 |
| MODULATION BY SYMBIONT OF ENTRY INTO HOST                               | GO:0052372 | 32  | -0.25 | -1.68 | 3.19E-02 | 9.24E-02 |
| NEGATIVE REGULATION OF CELLULAR PROTEIN LOCALIZATION                    | GO:1903828 | 75  | -0.17 | -1.68 | 3.00E-02 | 9.26E-02 |
| REGULATION OF NATURAL KILLER CELL MEDIATED IMMUNITY                     | GO:0002715 | 30  | -0.26 | -1.68 | 3.07E-02 | 9.25E-02 |
| REGULATION OF VASCULATURE DEVELOPMENT                                   | GO:1901342 | 145 | -0.12 | -1.68 | 2.29E-02 | 9.19E-02 |
| GRANULOCYTE CHEMOTAXIS                                                  | GO:0071621 | 38  | -0.23 | -1.68 | 2.73E-02 | 9.20E-02 |
| CILIUM OR FLAGELLUM-DEPENDENT CELL MOTILITY                             | GO:0001539 | 31  | -0.25 | -1.68 | 3.78E-02 | 9.19E-02 |
| NEGATIVE REGULATION OF CELL-SUBSTRATE ADHESION                          | GO:0010812 | 35  | -0.23 | -1.69 | 2.69E-02 | 9.17E-02 |
| NEGATIVE REGULATION OF COLD-INDUCED THERMOGENESIS                       | GO:0120163 | 34  | -0.24 | -1.69 | 2.22E-02 | 9.00E-02 |
| PROTEIN COMPLEX OLIGOMERIZATION                                         | GO:0051259 | 122 | -0.13 | -1.69 | 2.62E-02 | 9.00E-02 |
| POSITIVE REGULATION OF PHOSPHOLIPASE ACTIVITY                           | GO:0010518 | 31  | -0.25 | -1.69 | 3.22E-02 | 8.96E-02 |
| PROTEIN HOMOOIGOMERIZATION                                              | GO:0051260 | 88  | -0.15 | -1.69 | 2.48E-02 | 8.97E-02 |
| MITOTIC SPINDLE ORGANIZATION                                            | GO:0007052 | 71  | -0.17 | -1.69 | 3.25E-02 | 8.98E-02 |
| RESPONSE TO METAL ION                                                   | GO:0010038 | 129 | -0.13 | -1.69 | 2.88E-02 | 9.00E-02 |
| POSITIVE REGULATION OF LIPASE ACTIVITY                                  | GO:0060193 | 36  | -0.24 | -1.69 | 2.70E-02 | 9.00E-02 |
| REGULATION OF MITOTIC CELL CYCLE PHASE TRANSITION                       | GO:1901990 | 191 | -0.11 | -1.69 | 2.55E-02 | 8.93E-02 |
| NEGATIVE REGULATION OF SECRETION                                        | GO:0051048 | 58  | -0.19 | -1.70 | 2.85E-02 | 8.85E-02 |
| NEGATIVE REGULATION OF MRNA CATABOLIC PROCESS                           | GO:1902373 | 36  | -0.24 | -1.70 | 1.80E-02 | 8.85E-02 |
| POSITIVE REGULATION OF RESPONSE TO DNA DAMAGE STIMULUS                  | GO:2001022 | 83  | -0.16 | -1.70 | 3.97E-02 | 8.76E-02 |
| REGULATION OF ENDOCYTOSIS                                               | GO:0030100 | 120 | -0.13 | -1.70 | 2.53E-02 | 8.76E-02 |
| REGULATION OF CHROMOSOME SEGREGATION                                    | GO:0051983 | 69  | -0.17 | -1.70 | 3.04E-02 | 8.66E-02 |
| CELLULAR SENESCENCE                                                     | GO:0090398 | 36  | -0.24 | -1.70 | 2.79E-02 | 8.64E-02 |
| CILIUM-DEPENDENT CELL MOTILITY                                          | GO:0060285 | 31  | -0.25 | -1.71 | 3.00E-02 | 8.53E-02 |
| REGULATION OF MONONUCLEAR CELL MIGRATION                                | GO:0071675 | 71  | -0.18 | -1.71 | 2.70E-02 | 8.47E-02 |
| ENDOTHELIAL CELL DIFFERENTIATION                                        | GO:0045446 | 40  | -0.23 | -1.71 | 3.07E-02 | 8.48E-02 |
| POSITIVE REGULATION OF NEURON PROJECTION DEVELOPMENT                    | GO:0010976 | 51  | -0.20 | -1.71 | 2.67E-02 | 8.38E-02 |
| ENDOSOME TO LYSOSOME TRANSPORT                                          | GO:0008333 | 46  | -0.22 | -1.71 | 2.01E-02 | 8.37E-02 |
| PEPTIDYL-TYROSINE PHOSPHORYLATION                                       | GO:0018108 | 46  | -0.22 | -1.71 | 2.78E-02 | 8.37E-02 |

|                                                                                   |            |     |       |       |          |          |
|-----------------------------------------------------------------------------------|------------|-----|-------|-------|----------|----------|
| REGULATION OF ANGIOGENESIS                                                        | GO:0045765 | 145 | -0.12 | -1.71 | 2.74E-02 | 8.36E-02 |
| HISTONE LYSINE METHYLATION                                                        | GO:0034968 | 46  | -0.22 | -1.71 | 1.41E-02 | 8.35E-02 |
| MICROTUBULE-BASED TRANSPORT                                                       | GO:0099111 | 107 | -0.14 | -1.72 | 2.59E-02 | 8.32E-02 |
| ACTIN CYTOSKELETON REORGANIZATION                                                 | GO:0031532 | 48  | -0.21 | -1.72 | 3.43E-02 | 8.31E-02 |
| UBIQUITIN-DEPENDENT ERAD PATHWAY                                                  | GO:0030433 | 69  | -0.17 | -1.72 | 3.28E-02 | 8.31E-02 |
| IMPORT INTO NUCLEUS                                                               | GO:0051170 | 68  | -0.18 | -1.72 | 1.58E-02 | 8.15E-02 |
| POSITIVE REGULATION OF PROTEIN SERINE/THREONINE KINASE ACTIVITY                   | GO:0071902 | 107 | -0.14 | -1.72 | 2.26E-02 | 8.17E-02 |
| POTASSIUM ION TRANSPORT                                                           | GO:0006813 | 50  | -0.21 | -1.72 | 1.59E-02 | 8.16E-02 |
| POSITIVE REGULATION OF PROTEOLYSIS INVOLVED IN CELLULAR PROTEIN CATABOLIC PROCESS | GO:1903052 | 98  | -0.14 | -1.72 | 3.48E-02 | 8.13E-02 |
| LIPID LOCALIZATION                                                                | GO:0010876 | 144 | -0.12 | -1.72 | 1.52E-02 | 8.13E-02 |
| SENSORY SYSTEM DEVELOPMENT                                                        | GO:0048880 | 82  | -0.16 | -1.72 | 1.02E-02 | 8.12E-02 |
| VISUAL SYSTEM DEVELOPMENT                                                         | GO:0150063 | 82  | -0.16 | -1.73 | 2.40E-02 | 8.08E-02 |
| NEGATIVE REGULATION OF NF-KAPPA-B TRANSCRIPTION FACTOR ACTIVITY                   | GO:0032088 | 67  | -0.18 | -1.73 | 2.24E-02 | 7.94E-02 |
| CELLULAR RESPONSE TO CHEMICAL STRESS                                              | GO:0062197 | 149 | -0.12 | -1.73 | 2.07E-02 | 7.93E-02 |
| EXOCYTOSIS                                                                        | GO:0006887 | 110 | -0.14 | -1.73 | 2.23E-02 | 7.95E-02 |
| POSITIVE REGULATION OF PROTEASOMAL UBIQUITIN-DEPENDENT PROTEIN CATABOLIC PROCESS  | GO:0032436 | 70  | -0.18 | -1.73 | 2.83E-02 | 7.90E-02 |
| RESPONSE TO MOLECULE OF BACTERIAL ORIGIN                                          | GO:0002237 | 135 | -0.13 | -1.73 | 3.15E-02 | 7.83E-02 |
| NEGATIVE REGULATION OF RESPONSE TO EXTERNAL STIMULUS                              | GO:0032102 | 200 | -0.10 | -1.74 | 1.99E-02 | 7.81E-02 |
| REGULATION OF PROTEIN LOCALIZATION TO CELL PERIPHERY                              | GO:1904375 | 80  | -0.17 | -1.74 | 1.17E-02 | 7.82E-02 |
| CELLULAR RESPONSE TO CHEMOKINE                                                    | GO:1990869 | 32  | -0.26 | -1.74 | 2.34E-02 | 7.80E-02 |
| PEPTIDYL-TYROSINE MODIFICATION                                                    | GO:0018212 | 49  | -0.21 | -1.74 | 1.62E-02 | 7.67E-02 |
| POSITIVE REGULATION OF UBIQUITIN-DEPENDENT PROTEIN CATABOLIC PROCESS              | GO:2000060 | 81  | -0.16 | -1.74 | 2.71E-02 | 7.68E-02 |
| SEXUAL REPRODUCTION                                                               | GO:0019953 | 177 | -0.11 | -1.74 | 2.39E-02 | 7.64E-02 |
| MAINTENANCE OF PROTEIN LOCATION IN CELL                                           | GO:0032507 | 47  | -0.22 | -1.75 | 2.45E-02 | 7.46E-02 |
| CELLULAR RESPONSE TO BIOTIC STIMULUS                                              | GO:0071216 | 115 | -0.14 | -1.75 | 2.93E-02 | 7.30E-02 |
| HISTONE UBIQUITINATION                                                            | GO:0016574 | 35  | -0.25 | -1.75 | 3.47E-02 | 7.31E-02 |
| AXON DEVELOPMENT                                                                  | GO:0061564 | 143 | -0.13 | -1.75 | 2.34E-02 | 7.33E-02 |
| SECRETION                                                                         | GO:0046903 | 178 | -0.11 | -1.75 | 1.96E-02 | 7.26E-02 |
| POSITIVE REGULATION OF INTERLEUKIN-8 PRODUCTION                                   | GO:0032757 | 48  | -0.22 | -1.76 | 3.20E-02 | 7.23E-02 |
| NUCLEAR-TRANSCRIBED MRNA CATABOLIC PROCESS, DEADENYLATION-DEPENDENT DECAY         | GO:0000288 | 34  | -0.25 | -1.76 | 1.47E-02 | 7.18E-02 |

|                                                                  |            |     |       |       |          |          |
|------------------------------------------------------------------|------------|-----|-------|-------|----------|----------|
| CENTROSOME DUPLICATION                                           | GO:0051298 | 31  | -0.26 | -1.76 | 2.61E-02 | 7.18E-02 |
| REGULATION OF CELL DIVISION                                      | GO:0051302 | 80  | -0.16 | -1.76 | 2.27E-02 | 7.04E-02 |
| POSITIVE REGULATION OF EPITHELIAL TO MESENCHYMAL TRANSITION      | GO:0010718 | 30  | -0.27 | -1.76 | 2.24E-02 | 6.95E-02 |
| NEGATIVE REGULATION OF RESPONSE TO CYTOKINE STIMULUS             | GO:0060761 | 42  | -0.23 | -1.77 | 1.62E-02 | 6.94E-02 |
| ENDOSOME ORGANIZATION                                            | GO:0007032 | 65  | -0.18 | -1.77 | 2.42E-02 | 6.94E-02 |
| NUCLEAR TRANSPORT                                                | GO:0051169 | 154 | -0.12 | -1.77 | 1.70E-02 | 6.85E-02 |
| REGULATION OF DEVELOPMENTAL GROWTH                               | GO:0048638 | 92  | -0.16 | -1.77 | 2.32E-02 | 6.85E-02 |
| REGULATION OF ERYTHROCYTE DIFFERENTIATION                        | GO:0045646 | 35  | -0.26 | -1.77 | 1.60E-02 | 6.78E-02 |
| IMPORT ACROSS PLASMA MEMBRANE                                    | GO:0098739 | 63  | -0.19 | -1.77 | 2.11E-02 | 6.77E-02 |
| POSITIVE REGULATION OF PHAGOCYTOSIS                              | GO:0050766 | 43  | -0.22 | -1.77 | 1.37E-02 | 6.75E-02 |
| CIRCADIAN RHYTHM                                                 | GO:0007623 | 72  | -0.18 | -1.78 | 9.67E-03 | 6.63E-02 |
| REGULATION OF ERK1 AND ERK2 CASCADE                              | GO:0070372 | 136 | -0.13 | -1.78 | 1.18E-02 | 6.51E-02 |
| NEGATIVE REGULATION OF ION TRANSPORT                             | GO:0043271 | 56  | -0.21 | -1.78 | 9.96E-03 | 6.51E-02 |
| PROTEIN IMPORT INTO NUCLEUS                                      | GO:0006606 | 65  | -0.18 | -1.78 | 1.18E-02 | 6.52E-02 |
| NEGATIVE REGULATION OF TRANSLATION                               | GO:0017148 | 129 | -0.13 | -1.78 | 1.84E-02 | 6.52E-02 |
| VESICLE TARGETING                                                | GO:0006903 | 31  | -0.27 | -1.78 | 1.19E-02 | 6.52E-02 |
| RESPONSE TO CHEMOKINE                                            | GO:1990868 | 32  | -0.26 | -1.78 | 8.02E-03 | 6.49E-02 |
| NUCLEOCYTOPLASMIC TRANSPORT                                      | GO:0006913 | 154 | -0.12 | -1.79 | 1.65E-02 | 6.50E-02 |
| REGULATION OF RNA STABILITY                                      | GO:0043487 | 129 | -0.13 | -1.79 | 1.43E-02 | 6.51E-02 |
| REGULATION OF CELLULAR RESPONSE TO INSULIN STIMULUS              | GO:1900076 | 32  | -0.26 | -1.79 | 1.74E-02 | 6.48E-02 |
| REGULATION OF PROTEASOMAL PROTEIN CATABOLIC PROCESS              | GO:0061136 | 140 | -0.13 | -1.79 | 1.37E-02 | 6.41E-02 |
| STRESS-ACTIVATED PROTEIN KINASE SIGNALING CASCADE                | GO:0031098 | 40  | -0.24 | -1.79 | 1.87E-02 | 6.42E-02 |
| VESICLE BUDDING FROM MEMBRANE                                    | GO:0006900 | 48  | -0.22 | -1.79 | 1.82E-02 | 6.44E-02 |
| CALCIUM-MEDIATED SIGNALING                                       | GO:0019722 | 83  | -0.17 | -1.79 | 1.93E-02 | 6.44E-02 |
| NEGATIVE REGULATION OF RESPONSE TO BIOTIC STIMULUS               | GO:0002832 | 78  | -0.17 | -1.79 | 1.15E-02 | 6.43E-02 |
| POSITIVE REGULATION OF CYTOSOLIC CALCIUM ION CONCENTRATION       | GO:0007204 | 114 | -0.15 | -1.79 | 1.39E-02 | 6.44E-02 |
| POSITIVE REGULATION OF DNA-BINDING TRANSCRIPTION FACTOR ACTIVITY | GO:0051091 | 176 | -0.12 | -1.79 | 1.84E-02 | 6.46E-02 |
| REGULATION OF VACUOLE ORGANIZATION                               | GO:0044088 | 40  | -0.24 | -1.79 | 1.39E-02 | 6.46E-02 |
| REGULATION OF REGULATED SECRETORY PATHWAY                        | GO:1903305 | 60  | -0.20 | -1.79 | 5.80E-03 | 6.42E-02 |
| REGULATION OF TYPE I INTERFERON PRODUCTION                       | GO:0032479 | 78  | -0.17 | -1.79 | 1.41E-02 | 6.42E-02 |
| AXO-DENDRITIC TRANSPORT                                          | GO:0008088 | 44  | -0.23 | -1.79 | 1.56E-02 | 6.42E-02 |
| REGULATION OF WNT SIGNALING PATHWAY                              | GO:0030111 | 173 | -0.12 | -1.79 | 1.06E-02 | 6.44E-02 |
| POSITIVE REGULATION OF NF-KAPPAB TRANSCRIPTION FACTOR ACTIVITY   | GO:0051092 | 119 | -0.14 | -1.80 | 1.22E-02 | 6.42E-02 |

|                                                                     |            |     |       |       |          |          |
|---------------------------------------------------------------------|------------|-----|-------|-------|----------|----------|
| REGULATION OF GENE SILENCING                                        | GO:0060968 | 45  | -0.23 | -1.80 | 2.20E-02 | 6.39E-02 |
| ANATOMICAL STRUCTURE MATURATION                                     | GO:0071695 | 47  | -0.22 | -1.80 | 7.53E-03 | 6.39E-02 |
| CELL MORPHOGENESIS INVOLVED IN NEURON DIFFERENTIATION               | GO:0048667 | 154 | -0.13 | -1.80 | 4.11E-03 | 6.31E-02 |
| MULTICELLULAR ORGANISMAL HOMEOSTASIS                                | GO:0048871 | 119 | -0.14 | -1.80 | 1.25E-02 | 6.19E-02 |
| NEGATIVE REGULATION OF LEUKOCYTE PROLIFERATION                      | GO:0070664 | 44  | -0.23 | -1.80 | 1.19E-02 | 6.19E-02 |
| SISTER CHROMATID SEGREGATION                                        | GO:0000819 | 109 | -0.15 | -1.81 | 2.06E-02 | 6.06E-02 |
| REGULATION OF T CELL MEDIATED IMMUNITY                              | GO:0002709 | 62  | -0.19 | -1.81 | 1.85E-02 | 5.99E-02 |
| GASTRULATION                                                        | GO:0007369 | 44  | -0.23 | -1.81 | 1.35E-02 | 5.94E-02 |
| POSITIVE REGULATION OF WNT SIGNALING PATHWAY                        | GO:0030177 | 76  | -0.18 | -1.82 | 1.21E-02 | 5.85E-02 |
| CARDIAC MUSCLE TISSUE DEVELOPMENT                                   | GO:0048738 | 45  | -0.23 | -1.82 | 1.77E-02 | 5.74E-02 |
| POSITIVE REGULATION OF LIPID BIOSYNTHETIC PROCESS                   | GO:0046889 | 42  | -0.24 | -1.82 | 1.82E-02 | 5.68E-02 |
| REGULATION OF MRNA CATABOLIC PROCESS                                | GO:0061013 | 127 | -0.14 | -1.83 | 1.56E-02 | 5.63E-02 |
| CELLULAR PROCESS INVOLVED IN REPRODUCTION IN MULTICELLULAR ORGANISM | GO:0022412 | 78  | -0.18 | -1.83 | 2.19E-02 | 5.61E-02 |
| NEGATIVE REGULATION OF PROTEIN-CONTAINING COMPLEX DISASSEMBLY       | GO:0043242 | 44  | -0.23 | -1.83 | 1.43E-02 | 5.58E-02 |
| HISTONE H4 ACETYLATION                                              | GO:0043967 | 44  | -0.23 | -1.83 | 8.62E-03 | 5.58E-02 |
| CELL-CELL ADHESION                                                  | GO:0098609 | 192 | -0.11 | -1.83 | 1.53E-02 | 5.48E-02 |
| NEGATIVE REGULATION OF SECRETION BY CELL                            | GO:1903531 | 53  | -0.21 | -1.83 | 9.90E-03 | 5.49E-02 |
| PATHWAY                                                             | GO:0007200 | 32  | -0.28 | -1.83 | 1.56E-02 | 5.48E-02 |
| NEGATIVE REGULATION OF DNA-BINDING TRANSCRIPTION FACTOR ACTIVITY    | GO:0043433 | 116 | -0.15 | -1.84 | 2.02E-02 | 5.47E-02 |
| REGULATION OF PROTEIN UBIQUITINATION                                | GO:0031396 | 153 | -0.13 | -1.84 | 1.21E-02 | 5.45E-02 |
| MACROAUTOPHAGY                                                      | GO:0016236 | 136 | -0.14 | -1.84 | 8.00E-03 | 5.42E-02 |
| ENDOSOMAL TRANSPORT                                                 | GO:0016197 | 186 | -0.12 | -1.84 | 1.58E-02 | 5.42E-02 |
| REGULATION OF TYROSINE PHOSPHORYLATION OF STAT PROTEIN              | GO:0042509 | 35  | -0.26 | -1.84 | 1.43E-02 | 5.37E-02 |
| REGULATION OF LIPID METABOLIC PROCESS                               | GO:0019216 | 170 | -0.12 | -1.84 | 1.24E-02 | 5.39E-02 |
| LEUKOCYTE CHEMOTAXIS                                                | GO:0030595 | 72  | -0.18 | -1.85 | 2.01E-03 | 5.25E-02 |
| REGULATION OF AMYLOID PRECURSOR PROTEIN CATABOLIC PROCESS           | GO:1902991 | 34  | -0.27 | -1.85 | 7.55E-03 | 5.19E-02 |
| MYELOID CELL DIFFERENTIATION                                        | GO:0030099 | 115 | -0.15 | -1.85 | 9.77E-03 | 5.21E-02 |
| NEGATIVE REGULATION OF DEFENSE RESPONSE                             | GO:0031348 | 130 | -0.14 | -1.85 | 2.12E-03 | 5.22E-02 |
| REGULATION OF ION TRANSMEMBRANE TRANSPORT                           | GO:0034765 | 159 | -0.12 | -1.85 | 8.06E-03 | 5.18E-02 |
| REGULATION OF ORGANELLE ASSEMBLY                                    | GO:1902115 | 155 | -0.13 | -1.85 | 1.76E-02 | 5.15E-02 |
| POSITIVE REGULATION OF PROTEIN BINDING                              | GO:0032092 | 50  | -0.22 | -1.85 | 1.05E-02 | 5.11E-02 |
| STRIATED MUSCLE TISSUE DEVELOPMENT                                  | GO:0014706 | 60  | -0.21 | -1.85 | 1.21E-02 | 5.12E-02 |
| INSULIN RECEPTOR SIGNALING PATHWAY                                  | GO:0008286 | 37  | -0.25 | -1.86 | 9.65E-03 | 5.11E-02 |

|                                                                             |            |     |       |       |          |          |
|-----------------------------------------------------------------------------|------------|-----|-------|-------|----------|----------|
| NUCLEAR CHROMOSOME SEGREGATION                                              | GO:0098813 | 134 | -0.14 | -1.86 | 1.17E-02 | 5.12E-02 |
| REGULATION OF CELL SHAPE                                                    | GO:0008360 | 91  | -0.17 | -1.86 | 6.16E-03 | 5.12E-02 |
| CELL MORPHOGENESIS INVOLVED IN DIFFERENTIATION                              | GO:0000904 | 198 | -0.11 | -1.86 | 9.71E-03 | 5.13E-02 |
| MEMBRANE DOCKING                                                            | GO:0022406 | 64  | -0.20 | -1.86 | 1.01E-02 | 5.13E-02 |
| REGULATION OF PHOSPHATASE ACTIVITY                                          | GO:0010921 | 51  | -0.21 | -1.86 | 7.89E-03 | 5.14E-02 |
| KIDNEY DEVELOPMENT                                                          | GO:0001822 | 64  | -0.20 | -1.86 | 1.24E-02 | 5.15E-02 |
| REGULATION OF CELL-SUBSTRATE ADHESION                                       | GO:0010810 | 112 | -0.15 | -1.86 | 1.81E-02 | 5.11E-02 |
| NEGATIVE REGULATION OF PROTEIN DEPOLYMERIZATION                             | GO:1901880 | 34  | -0.26 | -1.86 | 1.36E-02 | 5.12E-02 |
| NEGATIVE REGULATION OF LEUKOCYTE DIFFERENTIATION                            | GO:1902106 | 51  | -0.22 | -1.86 | 1.01E-02 | 5.13E-02 |
| REGULATION OF LIPID BIOSYNTHETIC PROCESS                                    | GO:0046890 | 83  | -0.18 | -1.86 | 8.25E-03 | 5.13E-02 |
| RNA DESTABILIZATION                                                         | GO:0050779 | 64  | -0.20 | -1.86 | 4.04E-03 | 5.14E-02 |
| SECOND-MESSENGER-MEDIATED SIGNALING                                         | GO:0019932 | 106 | -0.16 | -1.86 | 1.55E-02 | 5.07E-02 |
| REGIONALIZATION                                                             | GO:0003002 | 55  | -0.22 | -1.87 | 4.00E-03 | 5.04E-02 |
| PROTEIN AUTOUBIQUITINATION                                                  | GO:0051865 | 57  | -0.21 | -1.87 | 8.11E-03 | 5.01E-02 |
| EPITHELIAL CELL DEVELOPMENT                                                 | GO:0002064 | 53  | -0.22 | -1.87 | 9.84E-03 | 4.98E-02 |
| MYELOID LEUKOCYTE DIFFERENTIATION                                           | GO:0002573 | 58  | -0.21 | -1.87 | 4.18E-03 | 4.99E-02 |
| PHOSPHATIDYLINOSITOL PHOSPHATE BIOSYNTHETIC PROCESS                         | GO:0046854 | 38  | -0.25 | -1.87 | 1.82E-02 | 4.97E-02 |
| NEGATIVE REGULATION OF MONONUCLEAR CELL PROLIFERATION                       | GO:0032945 | 42  | -0.25 | -1.87 | 6.12E-03 | 4.95E-02 |
| HEART DEVELOPMENT                                                           | GO:0007507 | 142 | -0.14 | -1.87 | 3.98E-03 | 4.93E-02 |
| NEGATIVE REGULATION OF HEMOPOIESIS                                          | GO:1903707 | 51  | -0.22 | -1.87 | 6.19E-03 | 4.92E-02 |
| MICROTUBULE CYTOSKELETON ORGANIZATION INVOLVED IN MITOSIS                   | GO:1902850 | 90  | -0.17 | -1.88 | 1.17E-02 | 4.90E-02 |
| CYTOSKELETON-DEPENDENT INTRACELLULAR TRANSPORT                              | GO:0030705 | 130 | -0.14 | -1.88 | 1.33E-02 | 4.75E-02 |
| INTRACELLULAR STEROID HORMONE RECEPTOR SIGNALING PATHWAY                    | GO:0030518 | 35  | -0.27 | -1.88 | 1.78E-02 | 4.73E-02 |
| IMPORT INTO CELL                                                            | GO:0098657 | 81  | -0.18 | -1.88 | 8.25E-03 | 4.74E-02 |
| RENAL SYSTEM DEVELOPMENT                                                    | GO:0072001 | 64  | -0.20 | -1.89 | 1.55E-02 | 4.70E-02 |
| REGULATION OF CELLULAR RESPONSE TO TRANSFORMING GROWTH FACTOR BETA STIMULUS | GO:1903844 | 72  | -0.19 | -1.89 | 1.04E-02 | 4.69E-02 |
| PROTEIN K48-LINKED UBIQUITINATION                                           | GO:0070936 | 55  | -0.21 | -1.89 | 9.88E-03 | 4.62E-02 |
| PROCESS                                                                     | GO:0032434 | 106 | -0.16 | -1.89 | 1.75E-02 | 4.63E-02 |
| CELLULAR RESPONSE TO STEROID HORMONE STIMULUS                               | GO:0071383 | 52  | -0.22 | -1.89 | 1.21E-02 | 4.63E-02 |
| MICROTUBULE-BASED MOVEMENT                                                  | GO:0007018 | 159 | -0.13 | -1.89 | 6.32E-03 | 4.64E-02 |
| CENTRAL NERVOUS SYSTEM NEURON DIFFERENTIATION                               | GO:0021953 | 31  | -0.29 | -1.89 | 5.88E-03 | 4.56E-02 |
| NEGATIVE REGULATION OF LYMPHOCYTE PROLIFERATION                             | GO:0050672 | 42  | -0.25 | -1.90 | 1.61E-02 | 4.54E-02 |

|                                                                                   |            |     |       |       |          |          |
|-----------------------------------------------------------------------------------|------------|-----|-------|-------|----------|----------|
| NEGATIVE REGULATION OF CELLULAR AMIDE METABOLIC PROCESS                           | GO:0034249 | 145 | -0.13 | -1.90 | 6.11E-03 | 4.38E-02 |
| MITOTIC SPINDLE ASSEMBLY                                                          | GO:0090307 | 37  | -0.26 | -1.90 | 1.97E-03 | 4.35E-02 |
| NEGATIVE REGULATION OF CELL MOTILITY                                              | GO:2000146 | 151 | -0.14 | -1.90 | 1.26E-02 | 4.35E-02 |
| REGULATION OF TRANSFORMING GROWTH FACTOR BETA RECEPTOR SIGNALING PATHWAY          | GO:0017015 | 72  | -0.19 | -1.90 | 9.88E-03 | 4.35E-02 |
| UROGENITAL SYSTEM DEVELOPMENT                                                     | GO:0001655 | 72  | -0.20 | -1.91 | 9.26E-03 | 4.29E-02 |
| SULFUR COMPOUND BIOSYNTHETIC PROCESS                                              | GO:0044272 | 89  | -0.18 | -1.91 | 6.34E-03 | 4.27E-02 |
| NEGATIVE REGULATION OF CYTOKINE-MEDIATED SIGNALING PATHWAY                        | GO:0001960 | 38  | -0.26 | -1.91 | 1.24E-02 | 4.25E-02 |
| NEGATIVE REGULATION OF LOCOMOTION                                                 | GO:0040013 | 165 | -0.13 | -1.91 | 2.01E-03 | 4.20E-02 |
| RECOMBINATIONAL REPAIR                                                            | GO:0000725 | 82  | -0.18 | -1.92 | 3.69E-03 | 4.17E-02 |
| LEUKOCYTE MIGRATION                                                               | GO:0050900 | 119 | -0.15 | -1.92 | 1.23E-02 | 4.17E-02 |
| POSITIVE REGULATION OF TRANSMEMBRANE TRANSPORT                                    | GO:0034764 | 92  | -0.17 | -1.92 | 1.76E-02 | 4.17E-02 |
| PROTEIN LOCALIZATION TO VACUOLE                                                   | GO:0072665 | 51  | -0.23 | -1.92 | 6.07E-03 | 4.18E-02 |
| RESPONSE TO ALCOHOL                                                               | GO:0097305 | 44  | -0.25 | -1.92 | 1.02E-02 | 4.18E-02 |
| NEGATIVE REGULATION OF TRANSFORMING GROWTH FACTOR BETA RECEPTOR SIGNALING PATHWAY | GO:0030512 | 38  | -0.26 | -1.92 | 1.19E-02 | 4.17E-02 |
| ORGANELLE TRANSPORT ALONG MICROTUBULE                                             | GO:0072384 | 58  | -0.22 | -1.92 | 6.11E-03 | 4.18E-02 |
| GLYCOPROTEIN BIOSYNTHETIC PROCESS                                                 | GO:0009101 | 170 | -0.13 | -1.92 | 3.96E-03 | 4.17E-02 |
| CARDIAC SEPTUM DEVELOPMENT                                                        | GO:0003279 | 30  | -0.29 | -1.92 | 8.32E-03 | 4.17E-02 |
| PHOSPHATIDYLINOSITOL BIOSYNTHETIC PROCESS                                         | GO:0006661 | 98  | -0.16 | -1.92 | 8.11E-03 | 4.13E-02 |
| CELL-CELL ADHESION VIA PLASMA-MEMBRANE ADHESION MOLECULES                         | GO:0098742 | 59  | -0.21 | -1.92 | 8.08E-03 | 4.14E-02 |
| POSITIVE REGULATION OF MRNA METABOLIC PROCESS                                     | GO:1903313 | 94  | -0.17 | -1.92 | 8.00E-03 | 4.13E-02 |
| REGULATION OF MRNA STABILITY                                                      | GO:0043488 | 119 | -0.15 | -1.93 | 1.05E-02 | 4.08E-02 |
| REGULATION OF RESPONSE TO WOUNDING                                                | GO:1903034 | 73  | -0.19 | -1.93 | 6.04E-03 | 4.05E-02 |
| CELL ACTIVATION INVOLVED IN IMMUNE RESPONSE                                       | GO:0002263 | 84  | -0.18 | -1.93 | 3.96E-03 | 4.03E-02 |
| CELLULAR RESPONSE TO ALCOHOL                                                      | GO:0097306 | 31  | -0.29 | -1.93 | 4.06E-03 | 4.02E-02 |
| TRANSPORT ALONG MICROTUBULE                                                       | GO:0010970 | 100 | -0.16 | -1.93 | 3.85E-03 | 4.03E-02 |
| POSITIVE REGULATION OF PEPTIDYL-TYROSINE PHOSPHORYLATION                          | GO:0050731 | 85  | -0.18 | -1.93 | 2.05E-03 | 4.03E-02 |
| REGULATION OF INTERLEUKIN-8 PRODUCTION                                            | GO:0032677 | 64  | -0.20 | -1.93 | 9.78E-03 | 4.03E-02 |
| POSITIVE REGULATION OF CELL PROJECTION ORGANIZATION                               | GO:0031346 | 161 | -0.13 | -1.93 | 3.88E-03 | 4.04E-02 |
| CELL POPULATION PROLIFERATION                                                     | GO:0008283 | 147 | -0.14 | -1.93 | 4.13E-03 | 4.00E-02 |
| VESICLE DOCKING                                                                   | GO:0048278 | 42  | -0.25 | -1.94 | 1.00E-02 | 3.96E-02 |
| DOUBLE-STRAND BREAK REPAIR VIA HOMOLOGOUS RECOMBINATION                           | GO:0000724 | 81  | -0.19 | -1.95 | 8.42E-03 | 3.80E-02 |



|                                                                                        |            |     |       |       |          |          |
|----------------------------------------------------------------------------------------|------------|-----|-------|-------|----------|----------|
| REGULATION OF EPITHELIAL TO MESENCHYMAL TRANSITION                                     | GO:0010717 | 53  | -0.22 | -1.95 | 4.23E-03 | 3.80E-02 |
| INORGANIC ANION TRANSPORT                                                              | GO:0015698 | 46  | -0.24 | -1.95 | 1.37E-02 | 3.80E-02 |
| SPINDLE ASSEMBLY                                                                       | GO:0051225 | 71  | -0.20 | -1.95 | 4.10E-03 | 3.79E-02 |
| POSITIVE REGULATION OF RESPONSE TO WOUNDING                                            | GO:1903036 | 31  | -0.29 | -1.95 | 1.27E-02 | 3.77E-02 |
| REGULATION OF RNA SPLICING                                                             | GO:0043484 | 111 | -0.16 | -1.95 | 9.73E-03 | 3.77E-02 |
| POSITIVE REGULATION OF CARBOHYDRATE METABOLIC PROCESS                                  | GO:0045913 | 33  | -0.28 | -1.95 | 1.18E-02 | 3.78E-02 |
| NEPHRON DEVELOPMENT                                                                    | GO:0072006 | 34  | -0.28 | -1.95 | 4.12E-03 | 3.80E-02 |
| REGULATION OF PROTEIN TYROSINE KINASE ACTIVITY                                         | GO:0061097 | 50  | -0.24 | -1.95 | 7.46E-03 | 3.75E-02 |
| STEROID HORMONE MEDIATED SIGNALING PATHWAY                                             | GO:0043401 | 36  | -0.28 | -1.96 | 7.83E-03 | 3.72E-02 |
| POSITIVE REGULATION OF INTERFERON-BETA PRODUCTION                                      | GO:0032728 | 35  | -0.28 | -1.96 | 4.14E-03 | 3.73E-02 |
| REGULATION OF CYTOSOLIC CALCIUM ION CONCENTRATION                                      | GO:0051480 | 122 | -0.15 | -1.96 | 1.95E-03 | 3.73E-02 |
| REGULATION OF AUTOPHAGOSOME ASSEMBLY                                                   | GO:2000785 | 33  | -0.29 | -1.96 | 0.00E+00 | 3.62E-02 |
| MITOTIC NUCLEAR DIVISION                                                               | GO:0140014 | 130 | -0.15 | -1.97 | 1.95E-03 | 3.56E-02 |
| REGULATION OF TISSUE REMODELING                                                        | GO:0034103 | 34  | -0.29 | -1.97 | 1.01E-02 | 3.50E-02 |
| POSITIVE REGULATION OF CELL CYCLE PROCESS                                              | GO:0090068 | 136 | -0.15 | -1.97 | 2.09E-03 | 3.50E-02 |
| REGULATION OF LEUKOCYTE MEDIATED CYTOTOXICITY                                          | GO:0001910 | 54  | -0.23 | -1.97 | 6.09E-03 | 3.49E-02 |
| NEURON PROJECTION MORPHOGENESIS                                                        | GO:0048812 | 182 | -0.13 | -1.97 | 1.03E-02 | 3.46E-02 |
| REGULATION OF MEMBRANE LIPID DISTRIBUTION                                              | GO:0097035 | 36  | -0.28 | -1.98 | 7.65E-03 | 3.43E-02 |
| VESICLE-MEDIATED TRANSPORT TO THE PLASMA MEMBRANE                                      | GO:0098876 | 97  | -0.17 | -1.98 | 4.00E-03 | 3.44E-02 |
| REGULATION OF RECEPTOR-MEDIATED ENDOCYTOSIS                                            | GO:0048259 | 59  | -0.22 | -1.98 | 0.00E+00 | 3.40E-02 |
| REGULATION OF CHEMOKINE PRODUCTION                                                     | GO:0032642 | 48  | -0.24 | -1.98 | 6.01E-03 | 3.41E-02 |
| REGULATION OF TRANSMEMBRANE RECEPTOR PROTEIN SERINE/THREONINE KINASE SIGNALING PATHWAY | GO:0090092 | 118 | -0.15 | -1.98 | 1.27E-02 | 3.42E-02 |
| AUTOPHAGOSOME ORGANIZATION                                                             | GO:1905037 | 55  | -0.23 | -1.98 | 1.95E-03 | 3.42E-02 |
| REGULATION OF PROTEIN DEPOLYMERIZATION                                                 | GO:1901879 | 46  | -0.25 | -1.99 | 4.11E-03 | 3.35E-02 |
| REGULATION OF CELL-SUBSTRATE JUNCTION ASSEMBLY                                         | GO:0090109 | 39  | -0.27 | -1.99 | 6.19E-03 | 3.35E-02 |
| CELL PART MORPHOGENESIS                                                                | GO:0032990 | 196 | -0.13 | -1.99 | 9.71E-03 | 3.24E-02 |
| VESICLE FUSION                                                                         | GO:0006906 | 62  | -0.21 | -1.99 | 6.09E-03 | 3.25E-02 |
| NEGATIVE REGULATION OF T CELL PROLIFERATION                                            | GO:0042130 | 32  | -0.30 | -1.99 | 6.09E-03 | 3.24E-02 |
| REGULATION OF WOUND HEALING                                                            | GO:0061041 | 61  | -0.22 | -1.99 | 6.47E-03 | 3.24E-02 |
| NEGATIVE REGULATION OF CELLULAR COMPONENT MOVEMENT                                     | GO:0051271 | 156 | -0.14 | -2.00 | 9.75E-03 | 3.21E-02 |
| VESICLE LOCALIZATION                                                                   | GO:0051648 | 104 | -0.17 | -2.00 | 4.12E-03 | 3.21E-02 |
| REGULATION OF GENE EXPRESSION, EPIGENETIC                                              | GO:0040029 | 72  | -0.20 | -2.00 | 3.88E-03 | 3.12E-02 |

|                                                                                                    |            |     |       |       |          |          |
|----------------------------------------------------------------------------------------------------|------------|-----|-------|-------|----------|----------|
| REGULATION OF FOCAL ADHESION ASSEMBLY                                                              | GO:0051893 | 39  | -0.27 | -2.00 | 3.94E-03 | 3.12E-02 |
| REGULATION OF TUMOR NECROSIS FACTOR PRODUCTION                                                     | GO:0032680 | 98  | -0.18 | -2.01 | 5.92E-03 | 3.12E-02 |
| BLOOD CIRCULATION                                                                                  | GO:0008015 | 122 | -0.16 | -2.01 | 1.93E-03 | 3.10E-02 |
| MRNA DESTABILIZATION                                                                               | GO:0061157 | 62  | -0.22 | -2.01 | 0.00E+00 | 3.09E-02 |
| ANION TRANSPORT                                                                                    | GO:0006820 | 163 | -0.13 | -2.01 | 2.01E-03 | 3.06E-02 |
| ORGANELLE MEMBRANE FUSION                                                                          | GO:0090174 | 66  | -0.21 | -2.01 | 0.00E+00 | 2.99E-02 |
| CELLULAR CARBOHYDRATE METABOLIC PROCESS                                                            | GO:0044262 | 72  | -0.20 | -2.02 | 7.77E-03 | 2.99E-02 |
| POSITIVE REGULATION OF RAS PROTEIN SIGNAL TRANSDUCTION                                             | GO:0046579 | 36  | -0.28 | -2.02 | 2.01E-03 | 2.98E-02 |
| REGULATION OF BIOMINERALIZATION                                                                    | GO:0110149 | 42  | -0.27 | -2.02 | 4.00E-03 | 2.95E-02 |
| NEGATIVE REGULATION OF HYDROLASE ACTIVITY                                                          | GO:0051346 | 148 | -0.14 | -2.02 | 7.86E-03 | 2.92E-02 |
| POSITIVE REGULATION OF TUMOR NECROSIS FACTOR PRODUCTION                                            | GO:0032760 | 63  | -0.22 | -2.02 | 0.00E+00 | 2.94E-02 |
| FC RECEPTOR SIGNALING PATHWAY                                                                      | GO:0038093 | 37  | -0.28 | -2.02 | 2.02E-03 | 2.95E-02 |
| NEGATIVE REGULATION OF TRANSMEMBRANE RECEPTOR PROTEIN<br>SERINE/THREONINE KINASE SIGNALING PATHWAY | GO:0090101 | 57  | -0.23 | -2.03 | 4.03E-03 | 2.90E-02 |
| PHOSPHOLIPID TRANSPORT                                                                             | GO:0015914 | 47  | -0.26 | -2.03 | 2.15E-03 | 2.85E-02 |
| RHYTHMIC PROCESS                                                                                   | GO:0048511 | 78  | -0.19 | -2.03 | 0.00E+00 | 2.86E-02 |
| PROTEIN O-LINKED GLYCOSYLATION                                                                     | GO:0006493 | 62  | -0.22 | -2.03 | 4.06E-03 | 2.86E-02 |
| ERBB SIGNALING PATHWAY                                                                             | GO:0038127 | 35  | -0.29 | -2.03 | 2.05E-03 | 2.87E-02 |
| POSITIVE REGULATION OF SMALL GTPASE MEDIATED SIGNAL TRANSDUCTION                                   | GO:0051057 | 39  | -0.27 | -2.03 | 2.00E-03 | 2.86E-02 |
| LIPID TRANSPORT                                                                                    | GO:0006869 | 125 | -0.15 | -2.03 | 0.00E+00 | 2.87E-02 |
| ADENYLATE CYCLASE-ACTIVATING G PROTEIN-COUPLED RECEPTOR SIGNALING<br>PATHWAY                       | GO:0007189 | 49  | -0.24 | -2.03 | 3.92E-03 | 2.88E-02 |
| REGULATION OF BIOMINERAL TISSUE DEVELOPMENT                                                        | GO:0070167 | 42  | -0.27 | -2.04 | 4.26E-03 | 2.85E-02 |
| REGULATION OF CELL KILLING                                                                         | GO:0031341 | 66  | -0.22 | -2.04 | 4.05E-03 | 2.85E-02 |
| CYTOSOLIC TRANSPORT                                                                                | GO:0016482 | 129 | -0.15 | -2.04 | 8.25E-03 | 2.74E-02 |
| REGULATION OF EPITHELIAL CELL DIFFERENTIATION                                                      | GO:0030856 | 61  | -0.23 | -2.04 | 1.96E-03 | 2.76E-02 |
| POSITIVE REGULATION OF MRNA CATABOLIC PROCESS                                                      | GO:0061014 | 74  | -0.20 | -2.05 | 3.96E-03 | 2.72E-02 |
| LEARNING OR MEMORY                                                                                 | GO:0007611 | 55  | -0.23 | -2.05 | 2.00E-03 | 2.71E-02 |
| REGULATION OF CELL-MATRIX ADHESION                                                                 | GO:0001952 | 69  | -0.21 | -2.05 | 0.00E+00 | 2.70E-02 |
| REGULATION OF NEUROGENESIS                                                                         | GO:0050767 | 131 | -0.15 | -2.05 | 1.95E-03 | 2.68E-02 |
| CILIUM ASSEMBLY                                                                                    | GO:0060271 | 173 | -0.13 | -2.05 | 3.83E-03 | 2.66E-02 |
| CELL PROJECTION MORPHOGENESIS                                                                      | GO:0048858 | 187 | -0.13 | -2.06 | 0.00E+00 | 2.63E-02 |
| PROTEIN MODIFICATION BY SMALL PROTEIN REMOVAL                                                      | GO:0070646 | 107 | -0.17 | -2.06 | 3.98E-03 | 2.64E-02 |

|                                                                              |            |     |       |       |          |          |
|------------------------------------------------------------------------------|------------|-----|-------|-------|----------|----------|
| REGULATION OF PEPTIDYL-TYROSINE PHOSPHORYLATION                              | GO:0050730 | 128 | -0.15 | -2.06 | 5.75E-03 | 2.63E-02 |
| SISTER CHROMATID COHESION                                                    | GO:0007062 | 35  | -0.30 | -2.06 | 4.03E-03 | 2.60E-02 |
| REGULATION OF CYTOKINESIS                                                    | GO:0032465 | 60  | -0.22 | -2.06 | 4.02E-03 | 2.61E-02 |
| REGULATION OF CELL-SUBSTRATE JUNCTION ORGANIZATION                           | GO:0150116 | 44  | -0.26 | -2.06 | 3.87E-03 | 2.62E-02 |
| CELL GROWTH                                                                  | GO:0016049 | 30  | -0.31 | -2.06 | 6.40E-03 | 2.62E-02 |
| REGULATION OF CELL JUNCTION ASSEMBLY                                         | GO:1901888 | 84  | -0.19 | -2.07 | 7.89E-03 | 2.55E-02 |
| ORGANELLE LOCALIZATION BY MEMBRANE TETHERING                                 | GO:0140056 | 56  | -0.24 | -2.07 | 0.00E+00 | 2.45E-02 |
| REGULATION OF PHOSPHOLIPASE ACTIVITY                                         | GO:0010517 | 38  | -0.28 | -2.07 | 7.52E-03 | 2.44E-02 |
| FORMATION OF PRIMARY GERM LAYER                                              | GO:0001704 | 35  | -0.29 | -2.07 | 1.96E-03 | 2.44E-02 |
| PLASMA MEMBRANE BOUNDED CELL PROJECTION MORPHOGENESIS                        | GO:0120039 | 185 | -0.13 | -2.08 | 3.90E-03 | 2.44E-02 |
| RECEPTOR METABOLIC PROCESS                                                   | GO:0043112 | 60  | -0.23 | -2.08 | 1.97E-03 | 2.39E-02 |
| REGULATION OF CYTOKINE-MEDIATED SIGNALING PATHWAY                            | GO:0001959 | 84  | -0.19 | -2.08 | 7.87E-03 | 2.38E-02 |
| MACROPHAGE ACTIVATION                                                        | GO:0042116 | 32  | -0.31 | -2.08 | 2.04E-03 | 2.38E-02 |
| REGULATION OF LIPASE ACTIVITY                                                | GO:0060191 | 48  | -0.26 | -2.09 | 3.96E-03 | 2.29E-02 |
| AUTOPHAGOSOME ASSEMBLY                                                       | GO:0000045 | 54  | -0.24 | -2.09 | 2.01E-03 | 2.30E-02 |
| REGULATION OF BONE MINERALIZATION                                            | GO:0030500 | 33  | -0.31 | -2.09 | 4.28E-03 | 2.28E-02 |
| CELLULAR RESPONSE TO MECHANICAL STIMULUS                                     | GO:0071260 | 44  | -0.27 | -2.10 | 1.96E-03 | 2.24E-02 |
| HORMONE-MEDIATED SIGNALING PATHWAY                                           | GO:0009755 | 54  | -0.24 | -2.10 | 6.05E-03 | 2.19E-02 |
| ESTABLISHMENT OF VESICLE LOCALIZATION                                        | GO:0051650 | 102 | -0.18 | -2.10 | 0.00E+00 | 2.17E-02 |
| ORGANELLE FISSION                                                            | GO:0048285 | 194 | -0.13 | -2.10 | 2.09E-03 | 2.18E-02 |
| REGULATION OF TUMOR NECROSIS FACTOR SUPERFAMILY CYTOKINE PRODUCTION          | GO:1903555 | 103 | -0.18 | -2.11 | 2.13E-03 | 2.15E-02 |
| ENDOPLASMIC RETICULUM TO GOLGI VESICLE-MEDIATED TRANSPORT                    | GO:0006888 | 105 | -0.17 | -2.11 | 0.00E+00 | 2.16E-02 |
| RESPONSE TO ENDOPLASMIC RETICULUM STRESS                                     | GO:0034976 | 167 | -0.14 | -2.11 | 0.00E+00 | 2.16E-02 |
| NUCLEAR DIVISION                                                             | GO:0000280 | 175 | -0.14 | -2.11 | 3.84E-03 | 2.10E-02 |
| CILIUM ORGANIZATION                                                          | GO:0044782 | 189 | -0.13 | -2.12 | 5.81E-03 | 2.06E-02 |
| POSITIVE REGULATION OF PROTEIN UBIQUITINATION                                | GO:0031398 | 89  | -0.19 | -2.12 | 2.03E-03 | 2.07E-02 |
| POSITIVE REGULATION OF TUMOR NECROSIS FACTOR SUPERFAMILY CYTOKINE PRODUCTION | GO:1903557 | 66  | -0.23 | -2.12 | 2.00E-03 | 2.07E-02 |
| PROTEIN DEUBIQUITINATION                                                     | GO:0016579 | 89  | -0.19 | -2.12 | 0.00E+00 | 2.08E-02 |
| I-KAPPAB KINASE/NF-KAPPAB SIGNALING                                          | GO:0007249 | 40  | -0.29 | -2.12 | 0.00E+00 | 2.05E-02 |
| REGULATION OF SMALL GTPASE MEDIATED SIGNAL TRANSDUCTION                      | GO:0051056 | 175 | -0.14 | -2.13 | 2.04E-03 | 2.00E-02 |
| REGULATION OF CELL MORPHOGENESIS                                             | GO:0022604 | 177 | -0.14 | -2.13 | 1.92E-03 | 1.95E-02 |
| REGULATION OF PATTERN RECOGNITION RECEPTOR SIGNALING PATHWAY                 | GO:0062207 | 75  | -0.21 | -2.14 | 1.92E-03 | 1.83E-02 |

|                                                                                                                                                  |            |     |       |       |          |          |
|--------------------------------------------------------------------------------------------------------------------------------------------------|------------|-----|-------|-------|----------|----------|
| NEGATIVE REGULATION OF ERK1 AND ERK2 CASCADE                                                                                                     | GO:0070373 | 34  | -0.31 | -2.14 | 0.00E+00 | 1.83E-02 |
| NEGATIVE REGULATION OF CELLULAR RESPONSE TO GROWTH FACTOR STIMULUS                                                                               | GO:0090288 | 41  | -0.29 | -2.15 | 0.00E+00 | 1.82E-02 |
| VACUOLE ORGANIZATION                                                                                                                             | GO:0007033 | 104 | -0.18 | -2.15 | 2.04E-03 | 1.82E-02 |
| GOLGI TO PLASMA MEMBRANE TRANSPORT                                                                                                               | GO:0006893 | 45  | -0.27 | -2.15 | 0.00E+00 | 1.83E-02 |
| NEGATIVE REGULATION OF CELL MIGRATION                                                                                                            | GO:0030336 | 145 | -0.15 | -2.15 | 3.95E-03 | 1.84E-02 |
| MUSCLE TISSUE DEVELOPMENT                                                                                                                        | GO:0060537 | 67  | -0.22 | -2.15 | 2.02E-03 | 1.82E-02 |
| REGULATION OF NEURON PROJECTION DEVELOPMENT                                                                                                      | GO:0010975 | 171 | -0.14 | -2.16 | 1.98E-03 | 1.74E-02 |
| REGULATION OF LYMPHOCYTE MEDIATED IMMUNITY                                                                                                       | GO:0002706 | 106 | -0.18 | -2.16 | 0.00E+00 | 1.70E-02 |
| NEGATIVE REGULATION OF VIRAL PROCESS                                                                                                             | GO:0048525 | 73  | -0.22 | -2.16 | 1.98E-03 | 1.69E-02 |
| ESTABLISHMENT OF PROTEIN LOCALIZATION TO VACUOLE                                                                                                 | GO:0072666 | 38  | -0.30 | -2.17 | 4.06E-03 | 1.68E-02 |
| NEGATIVE REGULATION OF CELL-CELL ADHESION                                                                                                        | GO:0022408 | 108 | -0.18 | -2.17 | 2.07E-03 | 1.69E-02 |
| CELLULAR RESPONSE TO EXTRACELLULAR STIMULUS                                                                                                      | GO:0031668 | 128 | -0.17 | -2.17 | 0.00E+00 | 1.67E-02 |
| RESPONSE TO EXTRACELLULAR STIMULUS                                                                                                               | GO:0009991 | 168 | -0.14 | -2.17 | 0.00E+00 | 1.69E-02 |
| LYSOSOMAL TRANSPORT                                                                                                                              | GO:0007041 | 94  | -0.19 | -2.17 | 0.00E+00 | 1.66E-02 |
| REGULATION OF RESPONSE TO DNA DAMAGE STIMULUS                                                                                                    | GO:2001020 | 172 | -0.14 | -2.17 | 2.03E-03 | 1.66E-02 |
| NEGATIVE REGULATION OF ADAPTIVE IMMUNE RESPONSE                                                                                                  | GO:0002820 | 36  | -0.30 | -2.18 | 1.92E-03 | 1.67E-02 |
| FOREBRAIN DEVELOPMENT                                                                                                                            | GO:0030900 | 72  | -0.21 | -2.18 | 0.00E+00 | 1.68E-02 |
| NEGATIVE REGULATION OF VIRAL GENOME REPLICATION                                                                                                  | GO:0045071 | 46  | -0.28 | -2.18 | 2.02E-03 | 1.68E-02 |
| CELL CHEMOTAXIS                                                                                                                                  | GO:0060326 | 108 | -0.18 | -2.18 | 0.00E+00 | 1.68E-02 |
| POSITIVE REGULATION OF PROTEIN MODIFICATION BY SMALL PROTEIN CONJUGATION OR REMOVAL                                                              | GO:1903322 | 105 | -0.18 | -2.18 | 1.99E-03 | 1.68E-02 |
| REGULATION OF EXOCYTOSIS                                                                                                                         | GO:0017157 | 102 | -0.18 | -2.18 | 4.02E-03 | 1.64E-02 |
| NEGATIVE REGULATION OF LEUKOCYTE MEDIATED IMMUNITY                                                                                               | GO:0002704 | 41  | -0.29 | -2.18 | 0.00E+00 | 1.64E-02 |
| POSITIVE REGULATION OF PROTEIN CATABOLIC PROCESS                                                                                                 | GO:0045732 | 161 | -0.15 | -2.19 | 4.05E-03 | 1.54E-02 |
| POSITIVE REGULATION OF ENDOCYTOSIS                                                                                                               | GO:0045807 | 54  | -0.25 | -2.20 | 6.11E-03 | 1.56E-02 |
| PHOSPHOLIPID BIOSYNTHETIC PROCESS                                                                                                                | GO:0008654 | 177 | -0.14 | -2.20 | 0.00E+00 | 1.54E-02 |
| PROTEIN DESTABILIZATION                                                                                                                          | GO:0031648 | 32  | -0.32 | -2.20 | 3.98E-03 | 1.52E-02 |
| POSITIVE REGULATION OF INTERLEUKIN-1 PRODUCTION                                                                                                  | GO:0032732 | 52  | -0.26 | -2.20 | 3.80E-03 | 1.49E-02 |
| REGULATION OF NERVOUS SYSTEM DEVELOPMENT                                                                                                         | GO:0051960 | 155 | -0.15 | -2.21 | 0.00E+00 | 1.45E-02 |
| NEGATIVE REGULATION OF ADAPTIVE IMMUNE RESPONSE BASED ON SOMATIC RECOMBINATION OF IMMUNE RECEPTORS BUILT FROM IMMUNOGLOBULIN SUPERFAMILY DOMAINS | GO:0002823 | 31  | -0.34 | -2.21 | 2.02E-03 | 1.45E-02 |
| REGULATION OF TOLL-LIKE RECEPTOR SIGNALING PATHWAY                                                                                               | GO:0034121 | 50  | -0.27 | -2.21 | 2.10E-03 | 1.44E-02 |

|                                                                                                                                         |            |     |       |       |          |          |
|-----------------------------------------------------------------------------------------------------------------------------------------|------------|-----|-------|-------|----------|----------|
| ADENYLATE CYCLASE-MODULATING G PROTEIN-COUPLED RECEPTOR SIGNALING PATHWAY                                                               | GO:0007188 | 78  | -0.22 | -2.22 | 0.00E+00 | 1.38E-02 |
| COGNITION                                                                                                                               | GO:0050890 | 81  | -0.21 | -2.22 | 1.86E-03 | 1.37E-02 |
| REGULATION OF COLD-INDUCED THERMOGENESIS                                                                                                | GO:0120161 | 97  | -0.19 | -2.22 | 1.99E-03 | 1.38E-02 |
| REGULATION OF VIRAL PROCESS                                                                                                             | GO:0050792 | 129 | -0.17 | -2.22 | 0.00E+00 | 1.35E-02 |
| ORGANOPHOSPHATE ESTER TRANSPORT                                                                                                         | GO:0015748 | 72  | -0.22 | -2.22 | 4.00E-03 | 1.36E-02 |
| NEGATIVE REGULATION OF INNATE IMMUNE RESPONSE                                                                                           | GO:0045824 | 51  | -0.27 | -2.22 | 1.83E-03 | 1.37E-02 |
| REGULATION OF VIRAL LIFE CYCLE                                                                                                          | GO:1903900 | 116 | -0.17 | -2.23 | 2.04E-03 | 1.36E-02 |
| CELLULAR RESPONSE TO ABIOTIC STIMULUS                                                                                                   | GO:0071214 | 175 | -0.15 | -2.23 | 2.05E-03 | 1.33E-02 |
| PROTEIN LOCALIZATION TO NUCLEUS                                                                                                         | GO:0034504 | 115 | -0.18 | -2.24 | 0.00E+00 | 1.29E-02 |
| NEGATIVE REGULATION OF LYMPHOCYTE MEDIATED IMMUNITY                                                                                     | GO:0002707 | 34  | -0.32 | -2.24 | 1.88E-03 | 1.28E-02 |
| REGULATION OF INTERLEUKIN-1 PRODUCTION                                                                                                  | GO:0032652 | 71  | -0.23 | -2.24 | 0.00E+00 | 1.29E-02 |
| REGULATION OF ADAPTIVE IMMUNE RESPONSE BASED ON SOMATIC RECOMBINATION OF IMMUNE RECEPTORS BUILT FROM IMMUNOGLOBULIN SUPERFAMILY DOMAINS | GO:0002822 | 105 | -0.18 | -2.24 | 0.00E+00 | 1.30E-02 |
| RECEPTOR INTERNALIZATION                                                                                                                | GO:0031623 | 40  | -0.31 | -2.24 | 2.02E-03 | 1.31E-02 |
| REGULATION OF RESPONSE TO CYTOKINE STIMULUS                                                                                             | GO:0060759 | 94  | -0.20 | -2.24 | 0.00E+00 | 1.30E-02 |
| CELLULAR RESPONSE TO ENVIRONMENTAL STIMULUS                                                                                             | GO:0104004 | 175 | -0.15 | -2.25 | 0.00E+00 | 1.29E-02 |
| REGULATION OF LEUKOCYTE MEDIATED IMMUNITY                                                                                               | GO:0002703 | 144 | -0.16 | -2.26 | 0.00E+00 | 1.22E-02 |
| CELLULAR RESPONSE TO INTERFERON-GAMMA                                                                                                   | GO:0071346 | 37  | -0.31 | -2.26 | 2.02E-03 | 1.18E-02 |
| TUBE MORPHOGENESIS                                                                                                                      | GO:0035239 | 194 | -0.14 | -2.26 | 2.04E-03 | 1.19E-02 |
| REGULATION OF EPITHELIAL CELL MIGRATION                                                                                                 | GO:0010632 | 141 | -0.16 | -2.27 | 0.00E+00 | 1.13E-02 |
| VASCULAR PROCESS IN CIRCULATORY SYSTEM                                                                                                  | GO:0003018 | 99  | -0.19 | -2.27 | 1.95E-03 | 1.12E-02 |
| REGULATION OF PROTEIN-CONTAINING COMPLEX DISASSEMBLY                                                                                    | GO:0043244 | 76  | -0.22 | -2.28 | 1.99E-03 | 1.10E-02 |
| REGULATION OF ADAPTIVE IMMUNE RESPONSE                                                                                                  | GO:0002819 | 119 | -0.18 | -2.28 | 0.00E+00 | 1.10E-02 |
| PROTEIN TARGETING TO VACUOLE                                                                                                            | GO:0006623 | 32  | -0.35 | -2.29 | 0.00E+00 | 1.03E-02 |
| REGULATION OF MACROAUTOPHAGY                                                                                                            | GO:0016241 | 108 | -0.19 | -2.29 | 0.00E+00 | 1.01E-02 |
| POSITIVE REGULATION OF INTERLEUKIN-6 PRODUCTION                                                                                         | GO:0032755 | 56  | -0.27 | -2.29 | 1.92E-03 | 1.01E-02 |
| REGULATION OF OSSIFICATION                                                                                                              | GO:0030278 | 39  | -0.30 | -2.30 | 2.01E-03 | 1.00E-02 |
| NEGATIVE REGULATION OF TRANSFERASE ACTIVITY                                                                                             | GO:0051348 | 170 | -0.15 | -2.30 | 0.00E+00 | 1.01E-02 |
| INOSITOL LIPID-MEDIATED SIGNALING                                                                                                       | GO:0048017 | 46  | -0.29 | -2.30 | 0.00E+00 | 1.00E-02 |
| POSITIVE REGULATION OF CELL CYCLE                                                                                                       | GO:0045787 | 175 | -0.15 | -2.31 | 2.07E-03 | 9.90E-03 |
| POSITIVE REGULATION OF PATTERN RECOGNITION RECEPTOR SIGNALING PATHWAY                                                                   | GO:0062208 | 34  | -0.33 | -2.31 | 2.08E-03 | 9.87E-03 |
| ANGIOGENESIS                                                                                                                            | GO:0001525 | 104 | -0.19 | -2.32 | 2.03E-03 | 9.56E-03 |

|                                                                            |            |     |       |       |          |          |
|----------------------------------------------------------------------------|------------|-----|-------|-------|----------|----------|
| GLYCEROPHOSPHOLIPID BIOSYNTHETIC PROCESS                                   | GO:0046474 | 157 | -0.16 | -2.32 | 1.96E-03 | 9.57E-03 |
| MEMBRANE FUSION                                                            | GO:0061025 | 93  | -0.21 | -2.32 | 0.00E+00 | 9.39E-03 |
| TRANSMEMBRANE RECEPTOR PROTEIN SERINE/THREONINE KINASE SIGNALING PATHWAY   | GO:0007178 | 82  | -0.22 | -2.32 | 0.00E+00 | 9.42E-03 |
| POSITIVE REGULATION OF CHEMOKINE PRODUCTION                                | GO:0032722 | 37  | -0.32 | -2.33 | 0.00E+00 | 9.25E-03 |
| REGULATION OF CYTOKINE PRODUCTION INVOLVED IN INFLAMMATORY RESPONSE        | GO:1900015 | 33  | -0.33 | -2.33 | 2.07E-03 | 9.30E-03 |
| GOLGI ORGANIZATION                                                         | GO:0007030 | 107 | -0.20 | -2.33 | 0.00E+00 | 8.92E-03 |
| REGULATION OF PROTEIN MODIFICATION BY SMALL PROTEIN CONJUGATION OR REMOVAL | GO:1903320 | 180 | -0.15 | -2.34 | 0.00E+00 | 8.68E-03 |
| VACUOLAR TRANSPORT                                                         | GO:0007034 | 127 | -0.18 | -2.35 | 1.92E-03 | 8.45E-03 |
| REGULATION OF CELLULAR RESPONSE TO GROWTH FACTOR STIMULUS                  | GO:0090287 | 130 | -0.18 | -2.35 | 0.00E+00 | 8.51E-03 |
| PEPTIDYL-THREONINE PHOSPHORYLATION                                         | GO:0018107 | 56  | -0.26 | -2.35 | 0.00E+00 | 8.30E-03 |
| GLYCEROLIPID BIOSYNTHETIC PROCESS                                          | GO:0045017 | 167 | -0.16 | -2.36 | 1.91E-03 | 7.71E-03 |
| NEGATIVE REGULATION OF IMMUNE EFFECTOR PROCESS                             | GO:0002698 | 66  | -0.24 | -2.37 | 0.00E+00 | 7.48E-03 |
| TRANSFORMING GROWTH FACTOR BETA RECEPTOR SIGNALING PATHWAY                 | GO:0007179 | 51  | -0.28 | -2.37 | 0.00E+00 | 7.39E-03 |
| REGULATION OF INTERLEUKIN-1 BETA PRODUCTION                                | GO:0032651 | 63  | -0.25 | -2.37 | 0.00E+00 | 7.46E-03 |
| PATTERN SPECIFICATION PROCESS                                              | GO:0007389 | 84  | -0.23 | -2.38 | 1.99E-03 | 7.28E-03 |
| RESPONSE TO TRANSFORMING GROWTH FACTOR BETA                                | GO:0071559 | 70  | -0.25 | -2.38 | 0.00E+00 | 6.93E-03 |
| BLOOD VESSEL MORPHOGENESIS                                                 | GO:0048514 | 132 | -0.18 | -2.39 | 1.90E-03 | 6.94E-03 |
| BEHAVIOR                                                                   | GO:0007610 | 95  | -0.21 | -2.39 | 0.00E+00 | 6.77E-03 |
| RESPONSE TO MECHANICAL STIMULUS                                            | GO:0009612 | 66  | -0.25 | -2.40 | 0.00E+00 | 6.49E-03 |
| DEPHOSPHORYLATION                                                          | GO:0016311 | 150 | -0.17 | -2.41 | 1.94E-03 | 6.27E-03 |
| AGING                                                                      | GO:0007568 | 64  | -0.26 | -2.41 | 1.95E-03 | 6.22E-03 |
| VASCULATURE DEVELOPMENT                                                    | GO:0001944 | 152 | -0.17 | -2.41 | 2.02E-03 | 6.24E-03 |
| CELLULAR RESPONSE TO NUTRIENT LEVELS                                       | GO:0031669 | 119 | -0.19 | -2.41 | 0.00E+00 | 6.25E-03 |
| TOLL-LIKE RECEPTOR SIGNALING PATHWAY                                       | GO:0002224 | 44  | -0.30 | -2.42 | 2.03E-03 | 6.04E-03 |
| PHOSPHATIDYLINOSITOL-MEDIATED SIGNALING                                    | GO:0048015 | 45  | -0.30 | -2.42 | 0.00E+00 | 6.03E-03 |
| POSITIVE REGULATION OF TYPE I INTERFERON PRODUCTION                        | GO:0032481 | 49  | -0.29 | -2.43 | 0.00E+00 | 5.60E-03 |
| DEVELOPMENTAL GROWTH                                                       | GO:0048589 | 61  | -0.26 | -2.43 | 0.00E+00 | 5.66E-03 |
| NEGATIVE REGULATION OF T CELL ACTIVATION                                   | GO:0050868 | 67  | -0.25 | -2.43 | 0.00E+00 | 5.71E-03 |
| NEGATIVE REGULATION OF CELL ACTIVATION                                     | GO:0050866 | 109 | -0.20 | -2.44 | 0.00E+00 | 5.18E-03 |
| RESPONSE TO NUTRIENT LEVELS                                                | GO:0031667 | 156 | -0.16 | -2.45 | 1.96E-03 | 4.75E-03 |
| PROTEIN DEPHOSPHORYLATION                                                  | GO:0006470 | 109 | -0.20 | -2.45 | 0.00E+00 | 4.77E-03 |

|                                                                 |            |     |       |       |          |          |
|-----------------------------------------------------------------|------------|-----|-------|-------|----------|----------|
| POSITIVE REGULATION OF IMMUNE EFFECTOR PROCESS                  | GO:0002699 | 143 | -0.17 | -2.45 | 0.00E+00 | 4.82E-03 |
| BLOOD VESSEL DEVELOPMENT                                        | GO:0001568 | 146 | -0.18 | -2.46 | 0.00E+00 | 4.79E-03 |
| NEGATIVE REGULATION OF LYMPHOCYTE ACTIVATION                    | GO:0051250 | 83  | -0.24 | -2.46 | 0.00E+00 | 4.76E-03 |
| GROWTH                                                          | GO:0040007 | 62  | -0.27 | -2.46 | 0.00E+00 | 4.79E-03 |
| POSITIVE REGULATION OF INTERLEUKIN-1 BETA PRODUCTION            | GO:0032731 | 47  | -0.31 | -2.47 | 0.00E+00 | 4.37E-03 |
| NEGATIVE REGULATION OF IMMUNE RESPONSE                          | GO:0050777 | 121 | -0.20 | -2.49 | 0.00E+00 | 3.96E-03 |
| REGULATION OF INFLAMMATORY RESPONSE                             | GO:0050727 | 183 | -0.16 | -2.49 | 0.00E+00 | 4.03E-03 |
| NEGATIVE REGULATION OF PROTEIN KINASE ACTIVITY                  | GO:0006469 | 131 | -0.19 | -2.49 | 0.00E+00 | 4.07E-03 |
| REGULATION OF PHAGOCYTOSIS                                      | GO:0050764 | 62  | -0.27 | -2.49 | 0.00E+00 | 4.14E-03 |
| PHOSPHATIDYLINOSITOL METABOLIC PROCESS                          | GO:0046488 | 115 | -0.20 | -2.49 | 0.00E+00 | 4.19E-03 |
| RESPONSE TO INSULIN                                             | GO:0032868 | 91  | -0.22 | -2.50 | 0.00E+00 | 4.11E-03 |
| RESPONSE TO INTERFERON-GAMMA                                    | GO:0034341 | 54  | -0.29 | -2.50 | 0.00E+00 | 4.06E-03 |
| CELLULAR RESPONSE TO TRANSFORMING GROWTH FACTOR BETA STIMULUS   | GO:0071560 | 66  | -0.26 | -2.51 | 0.00E+00 | 4.04E-03 |
| NEGATIVE REGULATION OF KINASE ACTIVITY                          | GO:0033673 | 144 | -0.18 | -2.51 | 0.00E+00 | 4.12E-03 |
| CELLULAR RESPONSE TO STARVATION                                 | GO:0009267 | 104 | -0.21 | -2.52 | 0.00E+00 | 4.08E-03 |
| POSITIVE REGULATION OF GTPASE ACTIVITY                          | GO:0043547 | 149 | -0.18 | -2.52 | 0.00E+00 | 4.06E-03 |
| NEGATIVE REGULATION OF LEUKOCYTE ACTIVATION                     | GO:0002695 | 99  | -0.22 | -2.52 | 0.00E+00 | 4.14E-03 |
| NEGATIVE REGULATION OF MAPK CASCADE                             | GO:0043409 | 87  | -0.23 | -2.52 | 2.02E-03 | 4.16E-03 |
| NEGATIVE REGULATION OF LEUKOCYTE CELL-CELL ADHESION             | GO:1903038 | 74  | -0.25 | -2.52 | 2.03E-03 | 4.25E-03 |
| POST-GOLGI VESICLE-MEDIATED TRANSPORT                           | GO:0006892 | 86  | -0.23 | -2.52 | 0.00E+00 | 4.20E-03 |
| CELLULAR RESPONSE TO PEPTIDE HORMONE STIMULUS                   | GO:0071375 | 103 | -0.22 | -2.52 | 0.00E+00 | 4.22E-03 |
| CIRCULATORY SYSTEM PROCESS                                      | GO:0003013 | 177 | -0.16 | -2.53 | 0.00E+00 | 4.20E-03 |
| ACTIVATION OF INNATE IMMUNE RESPONSE                            | GO:0002218 | 45  | -0.32 | -2.53 | 0.00E+00 | 4.22E-03 |
| REGULATION OF INTERLEUKIN-6 PRODUCTION                          | GO:0032675 | 82  | -0.24 | -2.53 | 0.00E+00 | 4.20E-03 |
| CELLULAR RESPONSE TO ORGANIC CYCLIC COMPOUND                    | GO:0071407 | 187 | -0.16 | -2.53 | 0.00E+00 | 4.23E-03 |
| INFLAMMATORY RESPONSE                                           | GO:0006954 | 176 | -0.17 | -2.54 | 0.00E+00 | 3.99E-03 |
| CELLULAR RESPONSE TO INSULIN STIMULUS                           | GO:0032869 | 81  | -0.24 | -2.54 | 0.00E+00 | 4.10E-03 |
| GENE SILENCING BY RNA                                           | GO:0031047 | 46  | -0.33 | -2.58 | 0.00E+00 | 3.54E-03 |
| PEPTIDYL-THREONINE MODIFICATION                                 | GO:0018210 | 61  | -0.28 | -2.59 | 0.00E+00 | 3.46E-03 |
| NEGATIVE REGULATION OF PROTEIN SERINE/THREONINE KINASE ACTIVITY | GO:0071901 | 68  | -0.27 | -2.59 | 0.00E+00 | 3.41E-03 |
| RESPONSE TO STARVATION                                          | GO:0042594 | 115 | -0.21 | -2.62 | 0.00E+00 | 2.68E-03 |
| POSITIVE REGULATION OF INFLAMMATORY RESPONSE                    | GO:0050729 | 70  | -0.26 | -2.63 | 0.00E+00 | 2.51E-03 |
| MYELOID LEUKOCYTE ACTIVATION                                    | GO:0002274 | 73  | -0.26 | -2.64 | 0.00E+00 | 2.43E-03 |



|                                                    |            |     |       |       |          |          |
|----------------------------------------------------|------------|-----|-------|-------|----------|----------|
| REGULATION OF VIRAL GENOME REPLICATION             | GO:0045069 | 70  | -0.27 | -2.65 | 0.00E+00 | 2.50E-03 |
| RESPONSE TO GROWTH FACTOR                          | GO:0070848 | 188 | -0.16 | -2.65 | 0.00E+00 | 2.59E-03 |
| CELLULAR RESPONSE TO EXTERNAL STIMULUS             | GO:0071496 | 169 | -0.17 | -2.65 | 0.00E+00 | 2.62E-03 |
| POST-TRANSCRIPTIONAL GENE SILENCING BY RNA         | GO:0035194 | 44  | -0.34 | -2.67 | 0.00E+00 | 2.54E-03 |
| REGULATION OF MAP KINASE ACTIVITY                  | GO:0043405 | 102 | -0.23 | -2.67 | 1.90E-03 | 2.63E-03 |
| CELLULAR RESPONSE TO GROWTH FACTOR STIMULUS        | GO:0071363 | 175 | -0.17 | -2.70 | 0.00E+00 | 2.41E-03 |
| PROTEIN AUTOPHOSPHORYLATION                        | GO:0046777 | 123 | -0.21 | -2.71 | 0.00E+00 | 2.05E-03 |
| RESPONSE TO PEPTIDE HORMONE                        | GO:0043434 | 130 | -0.21 | -2.72 | 0.00E+00 | 2.06E-03 |
| RECEPTOR-MEDIATED ENDOCYTOSIS                      | GO:0006898 | 108 | -0.22 | -2.74 | 0.00E+00 | 1.65E-03 |
| POSITIVE REGULATION OF INNATE IMMUNE RESPONSE      | GO:0045089 | 88  | -0.25 | -2.75 | 0.00E+00 | 1.72E-03 |
| NEGATIVE REGULATION OF PROTEIN PHOSPHORYLATION     | GO:0001933 | 198 | -0.17 | -2.75 | 0.00E+00 | 1.80E-03 |
| GENE SILENCING                                     | GO:0016458 | 67  | -0.29 | -2.77 | 0.00E+00 | 1.65E-03 |
| GENE SILENCING BY MIRNA                            | GO:0035195 | 38  | -0.38 | -2.79 | 0.00E+00 | 1.38E-03 |
| POSTTRANSCRIPTIONAL GENE SILENCING                 | GO:0016441 | 46  | -0.35 | -2.82 | 0.00E+00 | 1.37E-03 |
| PEPTIDYL-SERINE MODIFICATION                       | GO:0018209 | 145 | -0.21 | -2.86 | 0.00E+00 | 9.66E-04 |
| CYTOKINE-MEDIATED SIGNALING PATHWAY                | GO:0019221 | 177 | -0.19 | -2.87 | 0.00E+00 | 8.23E-04 |
| INTRACELLULAR RECEPTOR SIGNALING PATHWAY           | GO:0030522 | 73  | -0.29 | -2.88 | 0.00E+00 | 6.47E-04 |
| NEGATIVE REGULATION OF MAP KINASE ACTIVITY         | GO:0043407 | 34  | -0.42 | -2.89 | 0.00E+00 | 5.78E-04 |
| REGULATION OF GTPASE ACTIVITY                      | GO:0043087 | 198 | -0.18 | -2.94 | 0.00E+00 | 4.99E-04 |
| RESPONSE TO VIRUS                                  | GO:0009615 | 189 | -0.19 | -2.94 | 0.00E+00 | 5.40E-04 |
| NEGATIVE REGULATION OF CELL ADHESION               | GO:0007162 | 165 | -0.19 | -2.98 | 0.00E+00 | 4.45E-04 |
| CELLULAR RESPONSE TO PEPTIDE                       | GO:1901653 | 140 | -0.22 | -3.05 | 0.00E+00 | 1.64E-04 |
| PEPTIDYL-SERINE PHOSPHORYLATION                    | GO:0018105 | 135 | -0.22 | -3.05 | 0.00E+00 | 1.82E-04 |
| PATTERN RECOGNITION RECEPTOR SIGNALING PATHWAY     | GO:0002221 | 67  | -0.32 | -3.13 | 0.00E+00 | 0.00E+00 |
| RESPONSE TO PEPTIDE                                | GO:1901652 | 172 | -0.21 | -3.17 | 0.00E+00 | 0.00E+00 |
| PROTEIN POLYUBIQUITINATION                         | GO:0000209 | 187 | -0.20 | -3.18 | 0.00E+00 | 0.00E+00 |
| POSITIVE REGULATION OF RESPONSE TO BIOTIC STIMULUS | GO:0002833 | 110 | -0.26 | -3.21 | 0.00E+00 | 0.00E+00 |
| POSITIVE REGULATION OF DEFENSE RESPONSE            | GO:0031349 | 156 | -0.23 | -3.33 | 0.00E+00 | 0.00E+00 |
| REGULATION OF INNATE IMMUNE RESPONSE               | GO:0045088 | 153 | -0.25 | -3.57 | 0.00E+00 | 0.00E+00 |
| DEFENSE RESPONSE TO VIRUS                          | GO:0051607 | 111 | -0.29 | -3.64 | 0.00E+00 | 0.00E+00 |
| DEFENSE RESPONSE TO SYMBIONT                       | GO:0140546 | 111 | -0.29 | -3.65 | 0.00E+00 | 0.00E+00 |
