# Supplementary material for: Whole-Blood Transcriptional Profiles Enable Early Prediction of the Presence of Coronary Atherosclerosis and High-Risk Plaque Features at Coronary CT Angiography
Source: MDPI journal article supplement (doi:10.3390/biomedicines10061309), 2022-06-02
Supplement: s1 [file s1]

**Supplementary Table S1.** Results of genome-wide differential expression analysis between CAD and noCAD. The list shows the statistics for all genes detected by RNA-Seq

**CAD.vs.noCAD**

| Gene Symbol | logFC | AveExpr | t     | P.Value |
|-------------|-------|---------|-------|---------|
| CHEK1       | -0.40 | 5.00    | -4.72 | 0.00002 |
| PRKAR1B     | 0.49  | 8.13    | 4.56  | 0.00003 |
| PTCD1       | 0.35  | 6.66    | 4.52  | 0.00004 |
| DNAJC13     | -0.29 | 8.87    | -4.51 | 0.00004 |
| RPL14P3     | 0.36  | 5.42    | 4.49  | 0.00004 |
| THAP3       | 0.30  | 8.32    | 4.48  | 0.00004 |
| USP33       | -0.34 | 7.96    | -4.46 | 0.00004 |
| CCDC61      | 0.32  | 7.60    | 4.38  | 0.00006 |
| ALDOC       | 0.34  | 9.00    | 4.36  | 0.00006 |
| FAM174C     | 0.46  | 8.95    | 4.35  | 0.00006 |
| C1GALT1     | -0.45 | 7.56    | -4.31 | 0.00007 |
| TRAPPC11    | -0.34 | 7.86    | -4.31 | 0.00007 |
| SH2B3       | -0.32 | 10.16   | -4.30 | 0.00007 |
| IDH1        | -0.34 | 8.14    | -4.27 | 0.00008 |
| GNB1L       | 0.35  | 6.71    | 4.25  | 0.00009 |
| OXSRI       | -0.28 | 8.83    | -4.25 | 0.00009 |
| C12orf43    | 0.35  | 8.16    | 4.23  | 0.00010 |
| NOSIP       | 0.43  | 11.37   | 4.19  | 0.00011 |
| C16orf74    | 0.45  | 7.54    | 4.18  | 0.00011 |
| EXOC8       | -0.39 | 7.43    | -4.18 | 0.00011 |
| PLA2G4A     | -0.45 | 5.58    | -4.16 | 0.00012 |
| DMXL2       | -0.54 | 8.60    | -4.14 | 0.00013 |
| GPD2        | -0.39 | 6.84    | -4.11 | 0.00014 |
| MZT2A       | 0.41  | 8.43    | 4.09  | 0.00015 |
| AL022718.1  | 0.75  | 8.71    | 4.09  | 0.00015 |
| RITA1       | 0.39  | 8.18    | 4.08  | 0.00016 |
| FRY         | -0.47 | 9.06    | -4.07 | 0.00016 |
| PCYT2       | 0.33  | 8.79    | 4.05  | 0.00017 |
| ECSIT       | 0.37  | 9.13    | 4.05  | 0.00017 |
| MED16       | 0.33  | 10.80   | 4.04  | 0.00018 |
| TMLHE       | -0.35 | 6.40    | -4.04 | 0.00018 |
| GAMT        | 0.40  | 6.94    | 4.03  | 0.00018 |
| EEF1D       | 0.37  | 13.58   | 3.99  | 0.00021 |
| UBOX5       | 0.28  | 8.52    | 3.99  | 0.00021 |
| ARFRP1      | 0.30  | 9.47    | 3.99  | 0.00021 |
| MARCHF9     | 0.34  | 9.22    | 3.99  | 0.00021 |
| RPS9        | 0.39  | 14.03   | 3.96  | 0.00023 |
| EEF1DP2     | 0.40  | 7.68    | 3.96  | 0.00023 |
| ARAP2       | -0.43 | 7.75    | -3.94 | 0.00024 |
| ZFAND5      | -0.28 | 10.07   | -3.93 | 0.00026 |
| PMAIP1      | -0.36 | 6.11    | -3.92 | 0.00027 |
| HECTD1      | -0.32 | 8.64    | -3.91 | 0.00027 |
| ETV3        | -0.34 | 8.00    | -3.91 | 0.00027 |
| B3GAT3      | 0.29  | 9.30    | 3.90  | 0.00028 |
| VPS51       | 0.34  | 11.37   | 3.90  | 0.00028 |

|            |       |       |       |         |
|------------|-------|-------|-------|---------|
| PATL1      | -0.33 | 9.02  | -3.89 | 0.00029 |
| MRPL34     | 0.30  | 8.72  | 3.89  | 0.00029 |
| TMUB1      | 0.38  | 9.15  | 3.88  | 0.00029 |
| PQBP1      | 0.31  | 10.11 | 3.87  | 0.00031 |
| SHPK       | 0.38  | 5.74  | 3.86  | 0.00032 |
| GNL1       | 0.27  | 9.63  | 3.86  | 0.00032 |
| LENG1      | 0.33  | 8.04  | 3.85  | 0.00032 |
| FBXO34     | -0.34 | 7.90  | -3.85 | 0.00033 |
| AL096829.1 | 0.33  | 5.84  | 3.84  | 0.00034 |
| RNASEH2C   | 0.29  | 8.97  | 3.82  | 0.00036 |
| ZEB2       | -0.36 | 9.38  | -3.82 | 0.00036 |
| C9orf16    | 0.49  | 8.86  | 3.82  | 0.00036 |
| NENF       | 0.40  | 8.70  | 3.81  | 0.00037 |
| UTRN       | -0.39 | 9.18  | -3.81 | 0.00037 |
| SETX       | -0.26 | 10.90 | -3.81 | 0.00037 |
| ELOF1      | 0.41  | 9.67  | 3.80  | 0.00038 |
| AP1G1      | -0.32 | 9.25  | -3.80 | 0.00039 |
| GSE1       | -0.29 | 9.15  | -3.79 | 0.00040 |
| DEAF1      | 0.24  | 9.29  | 3.78  | 0.00041 |
| USP25      | -0.32 | 8.28  | -3.77 | 0.00042 |
| KIAA1109   | -0.46 | 8.72  | -3.77 | 0.00042 |
| NUDT16L1   | 0.30  | 8.86  | 3.76  | 0.00043 |
| RAP2C      | -0.31 | 8.32  | -3.76 | 0.00043 |
| UBP1       | -0.26 | 9.06  | -3.76 | 0.00044 |
| HDHD3      | 0.34  | 7.53  | 3.76  | 0.00044 |
| SIT1       | 0.42  | 9.59  | 3.76  | 0.00044 |
| TRBJ2-6    | 0.37  | 5.01  | 3.75  | 0.00045 |
| SETD2      | -0.22 | 10.04 | -3.74 | 0.00046 |
| TLE5       | 0.34  | 13.35 | 3.73  | 0.00047 |
| ALKBH7     | 0.44  | 8.99  | 3.73  | 0.00047 |
| ATAD2B     | -0.32 | 6.94  | -3.72 | 0.00050 |
| C12orf57   | 0.49  | 9.91  | 3.71  | 0.00050 |
| SIKE1      | -0.24 | 6.98  | -3.69 | 0.00053 |
| TSC22D2    | -0.30 | 7.22  | -3.69 | 0.00053 |
| SESTD1     | -0.33 | 6.91  | -3.69 | 0.00054 |
| DUSP6      | -0.47 | 10.68 | -3.69 | 0.00054 |
| BIRC6      | -0.30 | 9.37  | -3.68 | 0.00056 |
| LRRK2      | -0.63 | 10.01 | -3.67 | 0.00057 |
| INF2       | 0.33  | 9.54  | 3.66  | 0.00059 |
| TNFRSF10B  | -0.34 | 9.11  | -3.66 | 0.00060 |
| GGT1       | 0.40  | 8.44  | 3.66  | 0.00060 |
| MIS18BP1   | -0.36 | 7.41  | -3.65 | 0.00061 |
| VEGFB      | 0.35  | 9.12  | 3.65  | 0.00061 |
| ARL2       | 0.42  | 8.19  | 3.65  | 0.00061 |
| TAF1       | -0.37 | 8.57  | -3.65 | 0.00061 |
| ATAD3C     | 0.45  | 5.31  | 3.64  | 0.00063 |
| ZNF428     | 0.37  | 8.29  | 3.64  | 0.00063 |
| OSBPL11    | -0.36 | 8.48  | -3.64 | 0.00063 |
| RPS21      | 0.51  | 10.48 | 3.63  | 0.00064 |
| ELF2       | -0.34 | 8.83  | -3.63 | 0.00064 |

|            |       |       |       |         |
|------------|-------|-------|-------|---------|
| POLR1E     | 0.33  | 8.42  | 3.63  | 0.00065 |
| ASMTL      | 0.24  | 9.72  | 3.63  | 0.00066 |
| SH3GLB2    | 0.27  | 10.41 | 3.62  | 0.00067 |
| GRAP       | 0.48  | 9.79  | 3.62  | 0.00068 |
| L3MBTL3    | -0.36 | 7.14  | -3.61 | 0.00069 |
| ZNF688     | 0.31  | 8.23  | 3.61  | 0.00069 |
| NOP53      | 0.45  | 13.21 | 3.61  | 0.00070 |
| ZDHHC20    | -0.31 | 8.21  | -3.61 | 0.00070 |
| DOCK4      | -0.53 | 6.13  | -3.60 | 0.00071 |
| PDE6B      | 0.28  | 7.19  | 3.59  | 0.00073 |
| ITPRID2    | -0.48 | 8.33  | -3.59 | 0.00073 |
| NDUFS8     | 0.39  | 9.48  | 3.59  | 0.00073 |
| SPRY2      | -0.39 | 5.08  | -3.59 | 0.00075 |
| THAP7      | 0.29  | 8.79  | 3.58  | 0.00075 |
| LIPE-AS1   | 0.32  | 5.36  | 3.57  | 0.00078 |
| STON1      | -0.40 | 5.20  | -3.57 | 0.00079 |
| SPG11      | -0.31 | 9.69  | -3.56 | 0.00080 |
| COX19      | 0.22  | 8.82  | 3.55  | 0.00082 |
| CEPT1      | -0.30 | 7.68  | -3.55 | 0.00084 |
| BIN1       | 0.34  | 11.10 | 3.55  | 0.00084 |
| STUB1      | 0.31  | 10.74 | 3.54  | 0.00085 |
| OXR1       | -0.30 | 6.96  | -3.54 | 0.00085 |
| MEPCE      | 0.24  | 10.59 | 3.54  | 0.00085 |
| HSPBP1     | 0.44  | 8.36  | 3.54  | 0.00086 |
| MRPS34     | 0.37  | 9.64  | 3.54  | 0.00086 |
| ATP10D     | -0.38 | 6.62  | -3.54 | 0.00086 |
| NSUN5      | 0.21  | 9.51  | 3.53  | 0.00089 |
| AC004241.2 | 0.41  | 5.03  | 3.53  | 0.00089 |
| RPL13      | 0.45  | 15.12 | 3.52  | 0.00090 |
| METTTL26   | 0.42  | 9.16  | 3.52  | 0.00091 |
| CD164      | -0.28 | 10.48 | -3.52 | 0.00091 |
| UBR5       | -0.30 | 9.26  | -3.52 | 0.00092 |
| ZSWIM6     | -0.44 | 7.69  | -3.51 | 0.00094 |
| MACF1      | -0.30 | 10.78 | -3.51 | 0.00094 |
| TMEM238    | 0.45  | 6.41  | 3.50  | 0.00096 |
| SLC22A15   | -0.58 | 6.65  | -3.50 | 0.00096 |
| SERINC1    | -0.38 | 10.03 | -3.50 | 0.00097 |
| KBTBD2     | -0.29 | 9.25  | -3.50 | 0.00097 |
| CHMP6      | 0.29  | 8.80  | 3.50  | 0.00098 |
| ZCCHC2     | -0.51 | 8.71  | -3.50 | 0.00098 |
| SPIN1      | -0.32 | 7.33  | -3.49 | 0.00098 |
| ERBIN      | -0.34 | 9.11  | -3.49 | 0.00098 |
| RP2        | -0.43 | 8.08  | -3.49 | 0.00099 |
| USP34      | -0.24 | 10.12 | -3.49 | 0.00101 |
| ZNRD2      | 0.30  | 8.00  | 3.48  | 0.00102 |
| TRIR       | 0.30  | 11.81 | 3.48  | 0.00103 |
| ZCCHC4     | -0.33 | 5.78  | -3.48 | 0.00103 |
| TNFAIP8L1  | 0.29  | 8.53  | 3.48  | 0.00104 |
| NMRAL1     | 0.33  | 9.24  | 3.47  | 0.00105 |
| LMTK3      | 0.40  | 6.55  | 3.47  | 0.00105 |

|            |       |       |       |         |
|------------|-------|-------|-------|---------|
| CHMP5      | -0.40 | 8.79  | -3.47 | 0.00105 |
| NDUFAF3    | 0.27  | 9.81  | 3.47  | 0.00106 |
| SLFN11     | -0.30 | 8.41  | -3.46 | 0.00107 |
| ANKFY1     | -0.28 | 9.73  | -3.46 | 0.00108 |
| HACD4      | -0.28 | 9.19  | -3.46 | 0.00108 |
| PDK4       | -0.41 | 7.38  | -3.46 | 0.00109 |
| RPLP2      | 0.40  | 14.80 | 3.46  | 0.00109 |
| PYCR2      | 0.20  | 9.61  | 3.46  | 0.00109 |
| LTB        | 0.41  | 12.27 | 3.46  | 0.00109 |
| CCNQ       | 0.24  | 8.59  | 3.46  | 0.00110 |
| DCXR       | 0.36  | 9.64  | 3.46  | 0.00110 |
| ATP6V1A    | -0.32 | 9.28  | -3.45 | 0.00112 |
| ZNF524     | 0.39  | 8.49  | 3.45  | 0.00112 |
| AC027097.2 | 0.29  | 6.95  | 3.45  | 0.00112 |
| TMEM167A   | -0.23 | 8.83  | -3.45 | 0.00114 |
| HIP1       | -0.53 | 9.39  | -3.45 | 0.00114 |
| ATG9B      | 0.44  | 7.31  | 3.44  | 0.00114 |
| TFPT       | 0.35  | 8.40  | 3.44  | 0.00114 |
| GIGYF2     | -0.24 | 9.19  | -3.44 | 0.00115 |
| RPL13P12   | 0.51  | 11.46 | 3.44  | 0.00116 |
| MRC1       | -0.43 | 5.13  | -3.44 | 0.00117 |
| TRBV15     | 0.48  | 5.97  | 3.44  | 0.00117 |
| MCM4       | -0.28 | 6.96  | -3.44 | 0.00117 |
| PDCD6IP    | -0.26 | 9.79  | -3.44 | 0.00117 |
| ABITRAM    | -0.25 | 6.75  | -3.44 | 0.00117 |
| MRPL43     | 0.26  | 9.55  | 3.43  | 0.00118 |
| FAM153CP   | 0.46  | 6.53  | 3.43  | 0.00118 |
| RPLP1      | 0.39  | 14.18 | 3.43  | 0.00119 |
| CEP76      | -0.27 | 5.51  | -3.43 | 0.00119 |
| DCP1A      | 0.32  | 9.58  | 3.43  | 0.00119 |
| YJU2       | 0.29  | 8.67  | 3.43  | 0.00120 |
| RPS25      | 0.33  | 13.53 | 3.43  | 0.00120 |
| EXOC1      | -0.30 | 8.09  | -3.42 | 0.00123 |
| FAR2       | -0.45 | 7.18  | -3.42 | 0.00124 |
| SUSD3      | 0.30  | 9.67  | 3.42  | 0.00124 |
| XPR1       | -0.31 | 7.10  | -3.41 | 0.00126 |
| LIPA       | -0.34 | 9.22  | -3.41 | 0.00127 |
| ZBTB20     | 0.56  | 7.56  | 3.41  | 0.00128 |
| RC3H2      | -0.24 | 8.12  | -3.41 | 0.00128 |
| SNRNP25    | 0.36  | 7.75  | 3.41  | 0.00129 |
| RCBTB2     | -0.30 | 8.52  | -3.40 | 0.00129 |
| RPRD1A     | -0.30 | 7.59  | -3.40 | 0.00131 |
| LRRC37B    | -0.26 | 7.45  | -3.40 | 0.00132 |
| PRKAB2     | -0.37 | 6.54  | -3.39 | 0.00133 |
| LHPP       | 0.36  | 9.12  | 3.39  | 0.00133 |
| PXN-AS1    | 0.30  | 5.47  | 3.39  | 0.00134 |
| RPL29      | 0.40  | 13.79 | 3.39  | 0.00135 |
| RPS14      | 0.40  | 13.57 | 3.39  | 0.00135 |
| TMEM134    | 0.33  | 9.04  | 3.39  | 0.00135 |
| RPL19      | 0.34  | 14.90 | 3.39  | 0.00135 |



|            |       |       |       |         |
|------------|-------|-------|-------|---------|
| MFSD14B    | -0.43 | 8.90  | -3.38 | 0.00137 |
| RPS6KC1    | -0.26 | 6.93  | -3.38 | 0.00137 |
| CCR2       | -0.36 | 9.95  | -3.38 | 0.00138 |
| SNX6       | -0.23 | 9.02  | -3.38 | 0.00139 |
| S1PR3      | -0.37 | 6.84  | -3.38 | 0.00139 |
| BACH1      | -0.41 | 9.39  | -3.37 | 0.00141 |
| RPS5       | 0.38  | 13.26 | 3.37  | 0.00143 |
| ALKBH3     | 0.25  | 7.89  | 3.37  | 0.00143 |
| CCDC106    | 0.38  | 6.76  | 3.37  | 0.00143 |
| CCDC124    | 0.35  | 8.91  | 3.37  | 0.00144 |
| MBD3       | 0.39  | 9.29  | 3.36  | 0.00146 |
| GIPC1      | 0.38  | 8.85  | 3.36  | 0.00147 |
| CLEC12A    | -0.79 | 9.37  | -3.36 | 0.00148 |
| C9orf72    | -0.44 | 7.88  | -3.35 | 0.00149 |
| YDJC       | 0.27  | 8.16  | 3.35  | 0.00150 |
| CEP350     | -0.34 | 8.34  | -3.35 | 0.00150 |
| ZNF777     | 0.25  | 8.95  | 3.35  | 0.00150 |
| THAP11     | 0.19  | 9.82  | 3.35  | 0.00151 |
| BICRAL     | -0.29 | 8.89  | -3.35 | 0.00151 |
| NUBP2      | 0.28  | 9.16  | 3.35  | 0.00152 |
| SNRPN      | 0.34  | 7.30  | 3.35  | 0.00153 |
| SGF29      | 0.35  | 9.06  | 3.35  | 0.00153 |
| USP15      | -0.45 | 10.14 | -3.35 | 0.00153 |
| RPL23      | 0.31  | 13.92 | 3.35  | 0.00153 |
| KCTD12     | -0.36 | 9.57  | -3.34 | 0.00155 |
| SENPA6     | -0.27 | 8.69  | -3.34 | 0.00155 |
| TRAPPC6A   | 0.38  | 8.63  | 3.34  | 0.00155 |
| OCRL       | -0.30 | 5.99  | -3.34 | 0.00156 |
| RIN2       | -0.40 | 7.73  | -3.34 | 0.00156 |
| GADD45GIP1 | 0.37  | 8.77  | 3.34  | 0.00157 |
| RPL13AP20  | 0.38  | 7.07  | 3.34  | 0.00158 |
| GTF3C5     | 0.20  | 9.87  | 3.33  | 0.00159 |
| ZNF526     | 0.23  | 8.48  | 3.33  | 0.00159 |
| SOX12      | 0.32  | 7.67  | 3.33  | 0.00160 |
| APOBEC3B   | -0.84 | 6.61  | -3.33 | 0.00161 |
| FGL2       | -0.36 | 11.69 | -3.33 | 0.00162 |
| PDK2       | 0.26  | 9.03  | 3.33  | 0.00163 |
| TMOD3      | -0.23 | 8.96  | -3.32 | 0.00165 |
| RABAC1     | 0.40  | 7.55  | 3.32  | 0.00165 |
| FAM120A    | -0.26 | 10.32 | -3.32 | 0.00166 |
| TGFB1I1    | 0.45  | 6.16  | 3.32  | 0.00166 |
| NSMCE1     | 0.32  | 10.02 | 3.31  | 0.00168 |
| ZEB2-AS1   | -0.30 | 5.01  | -3.31 | 0.00170 |
| PCF11      | -0.34 | 9.20  | -3.31 | 0.00173 |
| MZT2B      | 0.46  | 9.06  | 3.30  | 0.00173 |
| SHPRH      | -0.33 | 6.32  | -3.30 | 0.00173 |
| DDX60L     | -0.57 | 9.36  | -3.30 | 0.00174 |
| ZNF444     | 0.30  | 7.75  | 3.30  | 0.00174 |
| RIC1       | -0.35 | 7.74  | -3.30 | 0.00174 |
| SEPTIN9    | 0.27  | 13.62 | 3.30  | 0.00175 |

|             |       |       |       |         |
|-------------|-------|-------|-------|---------|
| IVD         | 0.21  | 9.41  | 3.30  | 0.00175 |
| FBL         | 0.36  | 11.62 | 3.30  | 0.00175 |
| LYST        | -0.42 | 10.04 | -3.30 | 0.00176 |
| RPL38       | 0.40  | 13.53 | 3.30  | 0.00177 |
| RPS15AP17   | 0.39  | 5.81  | 3.29  | 0.00179 |
| DDX5        | -0.35 | 12.19 | -3.29 | 0.00182 |
| SLC52A2     | 0.28  | 8.33  | 3.29  | 0.00183 |
| DICER1      | -0.40 | 8.83  | -3.29 | 0.00183 |
| CPEB2       | -0.37 | 6.80  | -3.28 | 0.00184 |
| FCGR3A      | -0.41 | 12.06 | -3.28 | 0.00184 |
| RPL37A      | 0.35  | 14.23 | 3.28  | 0.00185 |
| GGA1        | 0.21  | 10.17 | 3.28  | 0.00185 |
| ERCC6       | -0.23 | 7.44  | -3.28 | 0.00185 |
| CAVIN1      | 0.42  | 5.96  | 3.28  | 0.00187 |
| BUD23       | 0.29  | 9.20  | 3.27  | 0.00189 |
| MARCHF7     | -0.36 | 9.05  | -3.27 | 0.00189 |
| VCPIP1      | -0.34 | 8.49  | -3.27 | 0.00190 |
| JMJD1C      | -0.41 | 9.41  | -3.27 | 0.00190 |
| PPDPF       | 0.50  | 11.87 | 3.27  | 0.00190 |
| MAGIX       | 0.27  | 5.38  | 3.27  | 0.00191 |
| TASOR2      | -0.43 | 7.48  | -3.27 | 0.00193 |
| C12orf10    | 0.29  | 9.38  | 3.27  | 0.00193 |
| RELCH       | -0.37 | 7.54  | -3.27 | 0.00194 |
| NOC2LP2     | 0.33  | 5.05  | 3.27  | 0.00194 |
| TSPAN2      | -0.45 | 7.59  | -3.26 | 0.00197 |
| ARMT1       | -0.28 | 7.32  | -3.26 | 0.00198 |
| FAM8A1      | -0.43 | 8.83  | -3.26 | 0.00199 |
| P2RY14      | -0.43 | 6.07  | -3.26 | 0.00199 |
| ATP5F1D     | 0.35  | 9.38  | 3.25  | 0.00200 |
| GDAP2       | -0.27 | 7.26  | -3.25 | 0.00200 |
| SH2D3A      | 0.32  | 8.10  | 3.25  | 0.00202 |
| FXYD5       | 0.36  | 13.21 | 3.25  | 0.00203 |
| FLVCR2      | -0.29 | 7.15  | -3.25 | 0.00205 |
| PRDX2       | 0.36  | 10.38 | 3.25  | 0.00206 |
| FAM198B-AS1 | -0.42 | 5.19  | -3.25 | 0.00206 |
| RPS3AP47    | 0.57  | 7.52  | 3.24  | 0.00207 |
| SLC25A6     | 0.33  | 13.64 | 3.24  | 0.00209 |
| PARP8       | -0.39 | 10.20 | -3.24 | 0.00211 |
| ATP8A1      | -0.36 | 7.29  | -3.23 | 0.00213 |
| PRRC1       | -0.27 | 7.56  | -3.23 | 0.00213 |
| CTNNA1      | -0.26 | 10.28 | -3.23 | 0.00216 |
| RPL3        | 0.35  | 15.69 | 3.23  | 0.00216 |
| HIPK3       | -0.41 | 9.16  | -3.23 | 0.00217 |
| ZNF217      | -0.45 | 9.55  | -3.23 | 0.00217 |
| PRKAR1A     | -0.34 | 10.30 | -3.23 | 0.00218 |
| SYTL1       | 0.26  | 11.00 | 3.22  | 0.00223 |
| SELENOM     | 0.44  | 7.64  | 3.22  | 0.00224 |
| PTPN11      | -0.36 | 8.00  | -3.22 | 0.00224 |
| NBPF10      | -0.39 | 7.95  | -3.22 | 0.00224 |
| SPINDOC     | 0.28  | 7.74  | 3.21  | 0.00225 |

|            |       |       |       |         |
|------------|-------|-------|-------|---------|
| FNDC10     | 0.44  | 7.13  | 3.21  | 0.00225 |
| SEPTIN1    | 0.32  | 10.72 | 3.21  | 0.00226 |
| PRRT3      | 0.31  | 6.69  | 3.21  | 0.00227 |
| PPTC7      | -0.28 | 8.80  | -3.21 | 0.00228 |
| CPTP       | 0.41  | 8.40  | 3.21  | 0.00229 |
| EVI5       | -0.25 | 6.77  | -3.21 | 0.00230 |
| KDM1B      | -0.43 | 7.76  | -3.21 | 0.00230 |
| ANAPC16    | 0.19  | 10.39 | 3.21  | 0.00230 |
| PKN2       | -0.44 | 7.81  | -3.21 | 0.00231 |
| RPL26P6    | 0.42  | 6.87  | 3.21  | 0.00231 |
| STXBP3     | -0.40 | 8.18  | -3.20 | 0.00232 |
| UCP2       | 0.32  | 13.12 | 3.20  | 0.00233 |
| HELZ       | -0.22 | 8.75  | -3.20 | 0.00234 |
| PRR7       | 0.32  | 6.49  | 3.20  | 0.00234 |
| PURA       | 0.41  | 8.47  | 3.20  | 0.00234 |
| RPS19      | 0.42  | 14.32 | 3.20  | 0.00235 |
| NRIP1      | -0.32 | 6.56  | -3.20 | 0.00235 |
| GCH1       | -0.35 | 8.06  | -3.20 | 0.00237 |
| ARPC1B     | 0.43  | 8.82  | 3.20  | 0.00238 |
| C20orf194  | -0.25 | 7.15  | -3.19 | 0.00238 |
| AC107032.1 | 0.34  | 7.91  | 3.19  | 0.00239 |
| EDF1       | 0.32  | 11.54 | 3.19  | 0.00239 |
| RPL10P3    | 0.54  | 7.48  | 3.19  | 0.00240 |
| MIA3       | -0.21 | 9.63  | -3.19 | 0.00240 |
| WASHC4     | -0.31 | 8.29  | -3.19 | 0.00242 |
| EIF3G      | 0.31  | 12.07 | 3.19  | 0.00242 |
| SNAP47     | 0.27  | 8.52  | 3.19  | 0.00243 |
| RPL18      | 0.39  | 14.32 | 3.19  | 0.00244 |
| NLRP3      | -0.31 | 9.05  | -3.18 | 0.00246 |
| TRIO       | -0.32 | 8.20  | -3.18 | 0.00247 |
| RACK1      | 0.31  | 14.85 | 3.18  | 0.00247 |
| MDH2       | 0.24  | 10.97 | 3.18  | 0.00248 |
| MEMO1      | 0.41  | 5.96  | 3.18  | 0.00249 |
| ARHGEF6    | -0.21 | 9.90  | -3.18 | 0.00250 |
| CHCHD6     | 0.35  | 6.45  | 3.18  | 0.00250 |
| MOSPD2     | -0.42 | 8.00  | -3.17 | 0.00253 |
| ZNF224     | -0.25 | 8.08  | -3.17 | 0.00254 |
| CD7        | 0.39  | 11.36 | 3.17  | 0.00256 |
| FAM111A    | -0.32 | 8.73  | -3.17 | 0.00257 |
| POLD2      | 0.30  | 9.25  | 3.17  | 0.00257 |
| SVIP       | 0.31  | 8.64  | 3.17  | 0.00259 |
| ACSL4      | -0.48 | 8.55  | -3.16 | 0.00261 |
| RPS28P7    | 0.53  | 10.00 | 3.16  | 0.00261 |
| BEND5      | 0.33  | 6.06  | 3.16  | 0.00261 |
| ALKBH4     | 0.27  | 7.59  | 3.16  | 0.00261 |
| AL390728.4 | -0.46 | 7.00  | -3.16 | 0.00261 |
| RPL10A     | 0.31  | 13.51 | 3.16  | 0.00262 |
| RNF19A     | -0.38 | 8.07  | -3.16 | 0.00262 |
| AMD1       | -0.29 | 9.52  | -3.16 | 0.00262 |
| TCOF1      | 0.26  | 10.49 | 3.16  | 0.00263 |

|            |       |       |       |         |
|------------|-------|-------|-------|---------|
| BTN3A3     | -0.24 | 10.15 | -3.16 | 0.00265 |
| DOCK8      | -0.37 | 11.48 | -3.16 | 0.00266 |
| SAMD9      | -0.44 | 8.55  | -3.16 | 0.00267 |
| SNTA1      | 0.34  | 7.35  | 3.16  | 0.00267 |
| RPS15      | 0.38  | 13.85 | 3.16  | 0.00267 |
| HNRNPLL    | -0.27 | 7.43  | -3.16 | 0.00267 |
| LMBRD2     | -0.27 | 6.30  | -3.15 | 0.00268 |
| HERC1      | -0.23 | 10.42 | -3.15 | 0.00271 |
| PYM1       | 0.26  | 8.92  | 3.15  | 0.00271 |
| MRPS18B    | 0.25  | 9.70  | 3.15  | 0.00272 |
| METTL16    | 0.25  | 8.81  | 3.15  | 0.00272 |
| TMEM161B   | -0.30 | 6.02  | -3.15 | 0.00273 |
| TSR3       | 0.27  | 9.07  | 3.15  | 0.00274 |
| LYPLA1     | -0.32 | 7.26  | -3.15 | 0.00274 |
| CD6        | 0.35  | 11.89 | 3.15  | 0.00274 |
| RNF213     | -0.39 | 12.74 | -3.14 | 0.00275 |
| SNX27      | -0.27 | 9.64  | -3.14 | 0.00276 |
| SLC20A1    | -0.23 | 9.89  | -3.14 | 0.00276 |
| FOPNL      | -0.28 | 7.17  | -3.14 | 0.00277 |
| MAT2B      | -0.23 | 10.27 | -3.14 | 0.00277 |
| RPL23AP3   | 0.22  | 5.32  | 3.14  | 0.00278 |
| DPP7       | 0.35  | 10.70 | 3.14  | 0.00279 |
| FBXL15     | 0.37  | 7.85  | 3.14  | 0.00280 |
| AC027307.2 | 0.30  | 7.65  | 3.14  | 0.00282 |
| DHX15      | -0.25 | 9.08  | -3.14 | 0.00282 |
| ZNF358     | 0.40  | 7.24  | 3.13  | 0.00284 |
| TRIQK      | -0.37 | 6.68  | -3.13 | 0.00284 |
| IMPACT     | -0.27 | 6.54  | -3.13 | 0.00285 |
| UBXN1      | 0.27  | 11.75 | 3.13  | 0.00285 |
| MAN1B1     | 0.21  | 10.43 | 3.13  | 0.00285 |
| PLAGL1     | -0.48 | 7.51  | -3.13 | 0.00286 |
| NAA10      | 0.29  | 9.42  | 3.13  | 0.00286 |
| PDGFC      | -0.32 | 5.89  | -3.13 | 0.00288 |
| H1-10      | 0.29  | 11.15 | 3.13  | 0.00289 |
| SEC24D     | -0.37 | 7.95  | -3.13 | 0.00289 |
| CAPZA2     | -0.35 | 9.13  | -3.13 | 0.00290 |
| CLPP       | 0.26  | 9.16  | 3.13  | 0.00290 |
| ZNF837     | 0.31  | 5.41  | 3.13  | 0.00291 |
| FAU        | 0.35  | 11.98 | 3.12  | 0.00293 |
| CRTC1      | 0.22  | 8.95  | 3.12  | 0.00293 |
| DIP2B      | -0.32 | 9.06  | -3.12 | 0.00293 |
| ZNF91      | 0.39  | 7.69  | 3.12  | 0.00294 |
| TIMM50     | 0.22  | 8.71  | 3.12  | 0.00294 |
| CARD8      | -0.33 | 10.45 | -3.12 | 0.00295 |
| SF3A2      | 0.28  | 10.85 | 3.12  | 0.00295 |
| CYBB       | -0.37 | 11.42 | -3.12 | 0.00295 |
| LHFPL2     | -0.42 | 7.18  | -3.12 | 0.00296 |
| AKAP11     | -0.31 | 7.39  | -3.12 | 0.00297 |
| RPL13P2    | 0.31  | 5.87  | 3.12  | 0.00297 |
| GASK1B     | -0.37 | 7.66  | -3.12 | 0.00298 |

|            |       |       |       |         |
|------------|-------|-------|-------|---------|
| UHRF1BP1L  | -0.33 | 7.50  | -3.12 | 0.00298 |
| PHLPP1     | -0.32 | 7.57  | -3.12 | 0.00298 |
| ANGPTL6    | 0.31  | 5.44  | 3.12  | 0.00299 |
| AC027644.3 | 0.27  | 6.59  | 3.12  | 0.00300 |
| RCOR1      | -0.35 | 9.02  | -3.12 | 0.00300 |
| PEX1       | -0.29 | 6.88  | -3.11 | 0.00303 |
| ZNF71      | 0.31  | 7.63  | 3.11  | 0.00307 |
| CD46       | -0.37 | 10.77 | -3.11 | 0.00307 |
| PAPOLG     | -0.31 | 7.48  | -3.11 | 0.00308 |
| SLC2A4RG   | 0.33  | 10.04 | 3.11  | 0.00308 |
| XAB2       | 0.20  | 10.86 | 3.10  | 0.00308 |
| OSGIN2     | -0.33 | 7.79  | -3.10 | 0.00309 |
| NFATC1     | 0.22  | 9.74  | 3.10  | 0.00309 |
| LYRM4      | 0.29  | 8.10  | 3.10  | 0.00310 |
| LDLRAD3    | -0.26 | 5.76  | -3.10 | 0.00311 |
| MCRIP1     | 0.39  | 9.65  | 3.10  | 0.00313 |
| TLR8       | -0.48 | 9.97  | -3.10 | 0.00316 |
| MRPL23     | 0.35  | 9.03  | 3.10  | 0.00316 |
| RNPEPL1    | 0.25  | 12.27 | 3.10  | 0.00317 |
| ZNF395     | 0.27  | 9.21  | 3.10  | 0.00317 |
| N4BP2      | -0.31 | 5.80  | -3.09 | 0.00319 |
| APC        | -0.41 | 7.63  | -3.09 | 0.00322 |
| C8orf82    | 0.26  | 7.47  | 3.09  | 0.00324 |
| DENND5A    | -0.35 | 10.83 | -3.09 | 0.00324 |
| MFSD6      | -0.32 | 7.73  | -3.09 | 0.00324 |
| GOLGA1     | -0.23 | 8.30  | -3.09 | 0.00324 |
| APAF1      | -0.30 | 9.02  | -3.09 | 0.00326 |
| RPUSD1     | 0.26  | 8.83  | 3.09  | 0.00326 |
| NDUFA13    | 0.45  | 6.50  | 3.08  | 0.00327 |
| KCNJ2      | -0.56 | 8.02  | -3.08 | 0.00327 |
| EEF2       | 0.25  | 15.49 | 3.08  | 0.00328 |
| YIF1B      | 0.32  | 9.49  | 3.08  | 0.00328 |
| BCLAF1     | -0.24 | 9.09  | -3.08 | 0.00329 |
| RPL14      | 0.32  | 13.84 | 3.08  | 0.00331 |
| VAMP2      | 0.22  | 11.66 | 3.08  | 0.00331 |
| RNF126     | 0.25  | 9.75  | 3.08  | 0.00331 |
| SPCS1      | 0.20  | 9.41  | 3.08  | 0.00334 |
| SMARCB1    | 0.25  | 10.10 | 3.07  | 0.00338 |
| ADAM9      | -0.40 | 6.31  | -3.07 | 0.00342 |
| NDUFS7     | 0.31  | 9.81  | 3.07  | 0.00342 |
| IQGAP2     | -0.37 | 8.95  | -3.07 | 0.00344 |
| DENND1C    | 0.21  | 11.40 | 3.07  | 0.00345 |
| ZSCAN30    | -0.28 | 5.90  | -3.06 | 0.00345 |
| FAM122B    | -0.28 | 7.96  | -3.06 | 0.00349 |
| CCDC22     | 0.24  | 9.63  | 3.06  | 0.00351 |
| FBXW5      | 0.22  | 11.23 | 3.06  | 0.00352 |
| AC005392.2 | -0.96 | 6.22  | -3.06 | 0.00353 |
| USE1       | 0.27  | 8.83  | 3.06  | 0.00355 |
| SMCHD1     | -0.43 | 10.43 | -3.06 | 0.00355 |
| MAF1       | 0.30  | 11.01 | 3.06  | 0.00355 |

|            |       |       |       |         |
|------------|-------|-------|-------|---------|
| GBE1       | -0.34 | 7.08  | -3.05 | 0.00355 |
| TBCK       | -0.26 | 6.83  | -3.05 | 0.00357 |
| MIB1       | -0.26 | 7.09  | -3.05 | 0.00358 |
| AC018755.4 | -0.69 | 6.78  | -3.05 | 0.00360 |
| UXT        | 0.30  | 9.78  | 3.05  | 0.00362 |
| NEK4       | -0.25 | 6.89  | -3.05 | 0.00362 |
| EXOSC4     | 0.28  | 7.09  | 3.05  | 0.00364 |
| GALNT7     | -0.29 | 6.92  | -3.05 | 0.00364 |
| ARFGEF1    | -0.29 | 8.72  | -3.05 | 0.00365 |
| CTNNB1     | -0.21 | 10.16 | -3.05 | 0.00365 |
| NUDT18     | 0.28  | 8.02  | 3.05  | 0.00365 |
| AC142472.1 | 0.33  | 5.49  | 3.04  | 0.00366 |
| OGFRL1     | -0.32 | 10.13 | -3.04 | 0.00366 |
| LIPN       | -0.39 | 5.47  | -3.04 | 0.00366 |
| HEG1       | -0.35 | 7.54  | -3.04 | 0.00367 |
| KDM8       | 0.23  | 7.16  | 3.04  | 0.00367 |
| TOR1AIP1   | -0.30 | 9.14  | -3.04 | 0.00367 |
| FMR1       | -0.29 | 7.80  | -3.04 | 0.00368 |
| LPCAT2     | -0.45 | 8.43  | -3.04 | 0.00369 |
| CYP20A1    | 0.43  | 8.92  | 3.04  | 0.00369 |
| SPAG7      | 0.23  | 9.22  | 3.04  | 0.00370 |
| SNX10      | -0.38 | 8.56  | -3.04 | 0.00370 |
| NUFIP2     | -0.28 | 9.24  | -3.04 | 0.00371 |
| GALC       | -0.27 | 7.96  | -3.04 | 0.00371 |
| POLR2L     | 0.36  | 9.47  | 3.04  | 0.00371 |
| IFRD2      | 0.23  | 8.42  | 3.04  | 0.00372 |
| PANK3      | -0.24 | 7.50  | -3.04 | 0.00374 |
| TRBC2      | 0.41  | 13.31 | 3.04  | 0.00375 |
| SEN3       | 0.23  | 7.35  | 3.04  | 0.00375 |
| CCDC71     | 0.21  | 8.75  | 3.04  | 0.00375 |
| CUTA       | 0.33  | 10.11 | 3.04  | 0.00376 |
| CTDNEP1    | 0.24  | 11.01 | 3.03  | 0.00377 |
| RAB3IP     | 0.28  | 7.20  | 3.03  | 0.00377 |
| RLF        | -0.22 | 7.80  | -3.03 | 0.00379 |
| CHUK       | -0.32 | 7.35  | -3.03 | 0.00379 |
| TMED2      | -0.22 | 9.29  | -3.03 | 0.00380 |
| RABL6      | 0.30  | 10.25 | 3.03  | 0.00383 |
| RPS3       | 0.32  | 14.80 | 3.03  | 0.00384 |
| PKN1       | 0.23  | 12.24 | 3.03  | 0.00385 |
| PTGS2      | -0.42 | 6.76  | -3.03 | 0.00386 |
| COMMD2     | -0.21 | 7.67  | -3.02 | 0.00389 |
| DPYD       | -0.39 | 9.03  | -3.02 | 0.00389 |
| BAD        | 0.33  | 8.34  | 3.02  | 0.00389 |
| NME4       | 0.34  | 8.50  | 3.02  | 0.00390 |
| DNAJB2     | 0.26  | 10.56 | 3.02  | 0.00393 |
| Z97634.1   | 0.35  | 5.46  | 3.02  | 0.00393 |
| C19orf48   | 0.31  | 8.03  | 3.02  | 0.00396 |
| AP5S1      | 0.24  | 7.62  | 3.02  | 0.00397 |
| TCF25      | 0.19  | 11.49 | 3.02  | 0.00397 |
| BCR        | 0.19  | 10.83 | 3.01  | 0.00398 |

|            |       |       |       |         |
|------------|-------|-------|-------|---------|
| NELFE      | 0.24  | 9.94  | 3.01  | 0.00399 |
| BZW1       | -0.28 | 8.70  | -3.01 | 0.00400 |
| SNHG8      | 0.42  | 8.21  | 3.01  | 0.00400 |
| COX4I1     | 0.29  | 12.78 | 3.01  | 0.00401 |
| BCL7C      | 0.35  | 8.89  | 3.01  | 0.00401 |
| ZCRB1      | 0.34  | 8.09  | 3.01  | 0.00402 |
| ZNF517     | 0.28  | 7.04  | 3.01  | 0.00405 |
| GPR55      | 0.32  | 7.10  | 3.01  | 0.00406 |
| MYO5A      | -0.24 | 9.05  | -3.01 | 0.00406 |
| RPL36      | 0.34  | 12.22 | 3.01  | 0.00406 |
| RASA1      | -0.29 | 7.39  | -3.01 | 0.00406 |
| SLFN5      | -0.36 | 9.78  | -3.01 | 0.00407 |
| TEP1       | -0.29 | 9.65  | -3.01 | 0.00407 |
| B3GALT6    | 0.23  | 8.53  | 3.01  | 0.00407 |
| C6orf120   | -0.30 | 6.78  | -3.01 | 0.00407 |
| SERGEF     | 0.29  | 7.94  | 3.00  | 0.00411 |
| TRBC1      | 0.36  | 12.36 | 3.00  | 0.00411 |
| HCFC1R1    | 0.33  | 8.64  | 3.00  | 0.00412 |
| SRM        | 0.28  | 9.73  | 3.00  | 0.00412 |
| CDK17      | -0.37 | 7.21  | -3.00 | 0.00413 |
| DTX3L      | -0.36 | 9.71  | -3.00 | 0.00414 |
| AC008555.4 | 0.31  | 7.91  | 3.00  | 0.00415 |
| RPL37P2    | 0.42  | 9.42  | 3.00  | 0.00416 |
| AC009053.2 | -0.31 | 5.99  | -3.00 | 0.00416 |
| FBXW4      | 0.23  | 9.78  | 3.00  | 0.00416 |
| NNT        | -0.29 | 8.26  | -3.00 | 0.00417 |
| USF3       | -0.30 | 7.81  | -3.00 | 0.00417 |
| FSD1L      | -0.34 | 4.99  | -3.00 | 0.00419 |
| TP53BP2    | -0.23 | 8.54  | -3.00 | 0.00419 |
| UBR1       | -0.27 | 7.50  | -3.00 | 0.00419 |
| GCHFR      | 0.34  | 6.96  | 2.99  | 0.00420 |
| DDX3X      | -0.40 | 10.70 | -2.99 | 0.00421 |
| ACBD5      | -0.29 | 7.08  | -2.99 | 0.00422 |
| UROS       | 0.23  | 8.68  | 2.99  | 0.00425 |
| UBTF       | 0.16  | 11.58 | 2.99  | 0.00426 |
| TNFSF12    | 0.28  | 9.42  | 2.99  | 0.00429 |
| SNRPA      | 0.28  | 9.57  | 2.99  | 0.00429 |
| ZBTB14     | -0.24 | 7.96  | -2.99 | 0.00429 |
| GNB4       | -0.29 | 7.90  | -2.99 | 0.00432 |
| ABHD14B    | 0.26  | 9.94  | 2.99  | 0.00432 |
| KIDINS220  | -0.40 | 9.11  | -2.98 | 0.00433 |
| CCNT1      | -0.22 | 7.83  | -2.98 | 0.00434 |
| ABCA1      | -0.51 | 7.02  | -2.98 | 0.00436 |
| RPL36AL    | 0.30  | 11.43 | 2.98  | 0.00437 |
| FN3K       | 0.35  | 6.40  | 2.98  | 0.00438 |
| ZNF581     | 0.28  | 9.08  | 2.98  | 0.00439 |
| ARMC6      | 0.21  | 8.73  | 2.98  | 0.00439 |
| AL078595.1 | 0.51  | 5.69  | 2.98  | 0.00439 |
| LRRC29     | 0.25  | 6.08  | 2.98  | 0.00441 |
| ZNF784     | 0.23  | 7.50  | 2.98  | 0.00441 |

|            |       |       |       |         |
|------------|-------|-------|-------|---------|
| PGM3       | -0.25 | 6.43  | -2.98 | 0.00443 |
| FAHD1      | 0.30  | 7.66  | 2.97  | 0.00445 |
| GYS1       | 0.16  | 9.53  | 2.97  | 0.00446 |
| ZBTB7A     | 0.31  | 10.94 | 2.97  | 0.00447 |
| MFNG       | 0.22  | 11.62 | 2.97  | 0.00448 |
| AC136475.5 | -0.63 | 6.27  | -2.97 | 0.00451 |
| DBP        | 0.27  | 8.94  | 2.97  | 0.00452 |
| TBC1D10C   | 0.24  | 11.76 | 2.97  | 0.00452 |
| TEX264     | 0.26  | 9.77  | 2.97  | 0.00453 |
| MTMR4      | -0.24 | 8.67  | -2.97 | 0.00454 |
| TET2       | -0.45 | 8.68  | -2.97 | 0.00457 |
| CCDC120    | 0.25  | 6.65  | 2.96  | 0.00458 |
| ELF1       | -0.39 | 9.64  | -2.96 | 0.00466 |
| TMOD2      | -0.35 | 7.46  | -2.96 | 0.00466 |
| DMAC2L     | 0.30  | 7.32  | 2.96  | 0.00466 |
| VCAN       | -0.39 | 11.81 | -2.96 | 0.00467 |
| CORO1C     | -0.24 | 10.20 | -2.96 | 0.00468 |
| POLR2I     | 0.29  | 9.00  | 2.96  | 0.00468 |
| FBXW4P1    | 0.27  | 5.54  | 2.95  | 0.00471 |
| TESK2      | -0.26 | 7.25  | -2.95 | 0.00471 |
| SPTLC1     | -0.21 | 8.32  | -2.95 | 0.00471 |
| FAS        | -0.40 | 7.88  | -2.95 | 0.00474 |
| GSS        | 0.22  | 9.12  | 2.95  | 0.00478 |
| TBC1D8     | -0.36 | 8.43  | -2.95 | 0.00480 |
| PGPEP1     | 0.23  | 9.56  | 2.95  | 0.00482 |
| CLEC1A     | -0.32 | 5.29  | -2.95 | 0.00483 |
| RAB14      | -0.20 | 9.48  | -2.94 | 0.00483 |
| XRCC1      | 0.20  | 9.50  | 2.94  | 0.00485 |
| PAPOLA     | -0.23 | 10.20 | -2.94 | 0.00485 |
| SNX30      | -0.26 | 8.04  | -2.94 | 0.00486 |
| MRPL24     | 0.31  | 8.62  | 2.94  | 0.00486 |
| CIZ1       | 0.18  | 10.96 | 2.94  | 0.00486 |
| EPC1       | -0.16 | 8.96  | -2.94 | 0.00488 |
| ZNF324     | 0.19  | 7.54  | 2.94  | 0.00489 |
| POLR2E     | 0.27  | 10.94 | 2.94  | 0.00491 |
| NUDT21     | -0.18 | 8.80  | -2.94 | 0.00492 |
| CD27       | 0.41  | 10.44 | 2.94  | 0.00492 |
| ZBTB11     | -0.33 | 7.18  | -2.94 | 0.00492 |
| AL049597.1 | 0.25  | 4.97  | 2.94  | 0.00493 |
| TOPBP1     | -0.24 | 8.18  | -2.94 | 0.00493 |
| TACO1      | 0.23  | 7.92  | 2.94  | 0.00494 |
| BORCS6     | 0.26  | 9.01  | 2.93  | 0.00496 |
| HSPB1      | 0.38  | 10.07 | 2.93  | 0.00500 |
| SCAF1      | 0.25  | 9.92  | 2.93  | 0.00500 |
| SLC36A4    | -0.24 | 6.48  | -2.93 | 0.00501 |
| ADSS2      | -0.24 | 8.02  | -2.93 | 0.00503 |
| LINC00654  | -0.33 | 5.17  | -2.93 | 0.00504 |
| RPL21P7    | 0.25  | 4.97  | 2.93  | 0.00504 |
| AL031727.1 | 0.37  | 9.19  | 2.93  | 0.00504 |
| ZBTB38     | -0.36 | 7.79  | -2.93 | 0.00510 |



|            |       |       |       |         |
|------------|-------|-------|-------|---------|
| SF3B1      | -0.34 | 11.32 | -2.92 | 0.00511 |
| NHP2       | 0.28  | 9.12  | 2.92  | 0.00512 |
| NCSTN      | -0.19 | 10.80 | -2.92 | 0.00512 |
| DMTF1      | -0.37 | 7.92  | -2.92 | 0.00512 |
| LPGAT1     | -0.33 | 9.20  | -2.92 | 0.00513 |
| PICALM     | -0.32 | 11.10 | -2.92 | 0.00514 |
| SLK        | -0.27 | 8.83  | -2.92 | 0.00515 |
| SPOCK2     | 0.26  | 13.16 | 2.92  | 0.00516 |
| MRPS18A    | 0.26  | 8.55  | 2.92  | 0.00518 |
| FAM3A      | 0.23  | 8.96  | 2.92  | 0.00519 |
| WDR44      | -0.31 | 6.97  | -2.92 | 0.00522 |
| ACSF3      | 0.21  | 9.51  | 2.92  | 0.00523 |
| QKI        | -0.34 | 9.10  | -2.92 | 0.00524 |
| SURF1      | 0.27  | 9.52  | 2.92  | 0.00524 |
| ANKRD13A   | -0.27 | 10.53 | -2.92 | 0.00524 |
| NTMT1      | 0.27  | 8.34  | 2.92  | 0.00524 |
| AP000580.1 | 0.46  | 5.27  | 2.91  | 0.00527 |
| TLR4       | -0.49 | 10.17 | -2.91 | 0.00528 |
| ANP32B     | 0.24  | 11.22 | 2.91  | 0.00529 |
| PRMT1      | 0.25  | 10.31 | 2.91  | 0.00530 |
| RPL8       | 0.33  | 14.62 | 2.91  | 0.00533 |
| HACE1      | -0.30 | 5.44  | -2.91 | 0.00535 |
| THAP9-AS1  | -0.29 | 7.29  | -2.91 | 0.00538 |
| AC008850.2 | 0.29  | 5.16  | 2.90  | 0.00540 |
| CTSS       | -0.26 | 13.84 | -2.90 | 0.00541 |
| RPL28      | 0.35  | 14.73 | 2.90  | 0.00541 |
| PEBP1      | 0.30  | 10.67 | 2.90  | 0.00542 |
| SINHCAF    | -0.33 | 6.99  | -2.90 | 0.00544 |
| CLK4       | -0.36 | 7.70  | -2.90 | 0.00545 |
| OVCH1-AS1  | -0.36 | 5.32  | -2.90 | 0.00546 |
| PRDX3      | -0.24 | 9.02  | -2.90 | 0.00546 |
| LYPLA2     | 0.25  | 10.05 | 2.90  | 0.00546 |
| TSHZ2      | 0.54  | 7.27  | 2.90  | 0.00547 |
| MED23      | -0.37 | 7.73  | -2.90 | 0.00547 |
| RPS29      | 0.48  | 11.67 | 2.90  | 0.00547 |
| MAP2K5     | 0.21  | 8.13  | 2.90  | 0.00552 |
| C19orf53   | 0.31  | 10.44 | 2.90  | 0.00553 |
| ZXDC       | -0.23 | 9.26  | -2.90 | 0.00553 |
| PELI1      | -0.45 | 9.19  | -2.89 | 0.00558 |
| Z84492.1   | 0.28  | 6.09  | 2.89  | 0.00560 |
| ANGPT1     | -0.32 | 5.05  | -2.89 | 0.00560 |
| Z93930.2   | 0.31  | 5.12  | 2.89  | 0.00560 |
| TXN2       | 0.29  | 9.71  | 2.89  | 0.00561 |
| IGFBP4     | 0.35  | 6.91  | 2.89  | 0.00561 |
| CD209      | -0.36 | 5.26  | -2.89 | 0.00561 |
| GTF2F1     | 0.21  | 10.77 | 2.89  | 0.00562 |
| SMARCA5    | -0.21 | 9.09  | -2.89 | 0.00563 |
| NBDY       | 0.27  | 8.08  | 2.89  | 0.00564 |
| ZNF714     | 0.36  | 6.25  | 2.89  | 0.00566 |
| ABHD3      | -0.38 | 8.64  | -2.89 | 0.00566 |

|            |       |       |       |         |
|------------|-------|-------|-------|---------|
| MCRIP2     | 0.30  | 7.21  | 2.89  | 0.00568 |
| OTUD4      | -0.31 | 7.40  | -2.89 | 0.00568 |
| SETD7      | -0.26 | 7.56  | -2.88 | 0.00573 |
| EPS15      | -0.26 | 8.63  | -2.88 | 0.00573 |
| MICB       | -0.29 | 8.38  | -2.88 | 0.00574 |
| QTRT2      | -0.23 | 7.57  | -2.88 | 0.00576 |
| C19orf25   | 0.23  | 9.00  | 2.88  | 0.00580 |
| PSMA7      | 0.25  | 10.97 | 2.88  | 0.00580 |
| TM7SF2     | 0.31  | 7.18  | 2.88  | 0.00583 |
| ZNF117     | -0.46 | 7.04  | -2.88 | 0.00584 |
| RPS23      | 0.30  | 12.63 | 2.88  | 0.00584 |
| CLMN       | -0.25 | 7.56  | -2.88 | 0.00584 |
| AL353705.1 | 0.27  | 5.57  | 2.87  | 0.00585 |
| DDX58      | -0.48 | 8.87  | -2.87 | 0.00586 |
| ZNF677     | -0.30 | 5.61  | -2.87 | 0.00587 |
| APBB1      | 0.31  | 9.68  | 2.87  | 0.00587 |
| IMP3       | 0.24  | 9.38  | 2.87  | 0.00588 |
| AC139495.2 | -0.73 | 7.57  | -2.87 | 0.00588 |
| LIMD2      | 0.23  | 13.27 | 2.87  | 0.00589 |
| KIF16B     | -0.37 | 6.32  | -2.87 | 0.00590 |
| AL136380.1 | 0.34  | 5.24  | 2.87  | 0.00591 |
| HPS5       | -0.27 | 7.57  | -2.87 | 0.00591 |
| RPL23A     | 0.31  | 13.26 | 2.87  | 0.00593 |
| RRP1       | 0.27  | 8.15  | 2.87  | 0.00594 |
| AC127521.1 | 0.26  | 6.53  | 2.87  | 0.00594 |
| PUSL1      | 0.29  | 6.92  | 2.87  | 0.00596 |
| PIK3AP1    | -0.44 | 9.96  | -2.87 | 0.00597 |
| BEX5       | 0.26  | 5.55  | 2.87  | 0.00597 |
| RPL27      | 0.34  | 12.53 | 2.87  | 0.00598 |
| CRYBG1     | -0.19 | 9.52  | -2.87 | 0.00598 |
| UBL7       | 0.28  | 10.71 | 2.87  | 0.00600 |
| USP5       | 0.21  | 10.16 | 2.87  | 0.00600 |
| AGFG2      | 0.25  | 8.93  | 2.87  | 0.00601 |
| C5orf22    | -0.23 | 6.61  | -2.86 | 0.00603 |
| HAX1       | 0.22  | 9.79  | 2.86  | 0.00604 |
| AL355488.1 | -0.31 | 5.49  | -2.86 | 0.00605 |
| ATP11A     | -0.44 | 9.09  | -2.86 | 0.00605 |
| RAPGEF2    | -0.44 | 8.36  | -2.86 | 0.00606 |
| MAP10      | -0.35 | 5.04  | -2.86 | 0.00606 |
| PLCXD2     | -0.30 | 6.09  | -2.86 | 0.00607 |
| MED28      | -0.16 | 9.71  | -2.86 | 0.00609 |
| NACA4P     | 0.31  | 6.92  | 2.86  | 0.00609 |
| ORMDL3     | 0.26  | 10.90 | 2.86  | 0.00609 |
| RPS2P35    | 0.38  | 6.93  | 2.86  | 0.00611 |
| FAM234B    | -0.26 | 6.13  | -2.86 | 0.00612 |
| S1PR4      | 0.32  | 11.93 | 2.86  | 0.00613 |
| ARAF       | 0.18  | 11.04 | 2.86  | 0.00614 |
| AL359265.2 | 0.51  | 5.70  | 2.86  | 0.00614 |
| IGSF8      | 0.25  | 9.15  | 2.86  | 0.00614 |
| ADAM10     | -0.27 | 9.78  | -2.86 | 0.00614 |

|            |       |       |       |         |
|------------|-------|-------|-------|---------|
| L3MBTL2    | 0.19  | 9.78  | 2.86  | 0.00615 |
| UNC45A     | 0.18  | 10.29 | 2.86  | 0.00615 |
| WDR11      | -0.30 | 8.64  | -2.86 | 0.00615 |
| KDM7A      | -0.27 | 8.95  | -2.86 | 0.00616 |
| WDR74      | 0.23  | 8.88  | 2.86  | 0.00616 |
| OST4       | 0.27  | 10.96 | 2.85  | 0.00620 |
| CCDC12     | 0.29  | 9.71  | 2.85  | 0.00621 |
| COMMD8     | -0.25 | 7.36  | -2.85 | 0.00625 |
| ZNF641     | -0.30 | 9.39  | -2.85 | 0.00625 |
| PRPF31     | 0.22  | 10.04 | 2.85  | 0.00626 |
| ODC1-DT    | -0.28 | 5.46  | -2.85 | 0.00626 |
| IFIT2      | -0.73 | 10.36 | -2.85 | 0.00628 |
| OXLD1      | 0.24  | 8.52  | 2.85  | 0.00628 |
| STAG2      | -0.30 | 9.46  | -2.85 | 0.00629 |
| XRN1       | -0.35 | 8.21  | -2.85 | 0.00630 |
| MRPL4      | 0.29  | 8.96  | 2.85  | 0.00630 |
| ZNF593     | 0.41  | 7.14  | 2.85  | 0.00632 |
| PAN3       | -0.28 | 8.72  | -2.85 | 0.00634 |
| ZBTB21     | -0.23 | 6.64  | -2.84 | 0.00636 |
| KMT2C      | -0.34 | 9.50  | -2.84 | 0.00638 |
| PLEK       | -0.25 | 11.74 | -2.84 | 0.00640 |
| VPS13C     | -0.29 | 8.79  | -2.84 | 0.00640 |
| EIF2AK3    | -0.29 | 7.05  | -2.84 | 0.00640 |
| SH3BP1     | 0.35  | 9.06  | 2.84  | 0.00641 |
| ST3GAL6    | -0.27 | 7.16  | -2.84 | 0.00642 |
| CLEC5A     | -0.41 | 6.03  | -2.84 | 0.00643 |
| AP001062.1 | 0.28  | 6.38  | 2.84  | 0.00643 |
| TTLL12     | 0.17  | 9.22  | 2.84  | 0.00644 |
| NDUFV3     | 0.22  | 8.71  | 2.84  | 0.00645 |
| ATP13A3    | -0.33 | 7.32  | -2.84 | 0.00646 |
| ACPP       | -0.26 | 7.23  | -2.84 | 0.00646 |
| RBM42      | 0.26  | 10.46 | 2.84  | 0.00647 |
| CAMTA1     | 0.23  | 7.55  | 2.84  | 0.00651 |
| CTBP2      | -0.29 | 9.43  | -2.84 | 0.00651 |
| PTGER4     | -0.26 | 8.81  | -2.84 | 0.00651 |
| COG6       | -0.27 | 6.40  | -2.84 | 0.00652 |
| TMEM223    | 0.26  | 7.79  | 2.83  | 0.00652 |
| CIAO3      | 0.22  | 8.75  | 2.83  | 0.00653 |
| AL109809.1 | -0.40 | 5.33  | -2.83 | 0.00654 |
| TRIM5      | -0.37 | 7.33  | -2.83 | 0.00654 |
| SPOPL      | -0.31 | 7.96  | -2.83 | 0.00655 |
| ATR        | -0.27 | 7.58  | -2.83 | 0.00655 |
| PARP9      | -0.50 | 9.74  | -2.83 | 0.00658 |
| SIRT6      | 0.25  | 8.55  | 2.83  | 0.00659 |
| NEK9       | -0.18 | 9.63  | -2.83 | 0.00659 |
| RPL35      | 0.35  | 13.40 | 2.83  | 0.00659 |
| NIPSNAP1   | 0.15  | 8.72  | 2.83  | 0.00659 |
| MCMBP      | -0.19 | 9.49  | -2.83 | 0.00660 |
| LATS2      | -0.36 | 7.07  | -2.83 | 0.00660 |
| RPLP1P6    | 0.28  | 5.27  | 2.83  | 0.00661 |

|            |       |       |       |         |
|------------|-------|-------|-------|---------|
| RPS15AP1   | 0.36  | 8.60  | 2.83  | 0.00661 |
| C18orf25   | -0.26 | 7.80  | -2.83 | 0.00661 |
| PWWP2A     | -0.26 | 7.59  | -2.83 | 0.00661 |
| FNDC3A     | -0.34 | 7.45  | -2.83 | 0.00662 |
| ADCY7      | -0.32 | 10.68 | -2.83 | 0.00662 |
| IFIT5      | -0.42 | 7.98  | -2.83 | 0.00663 |
| AP006621.3 | 0.37  | 6.33  | 2.83  | 0.00665 |
| ZNF493     | -0.30 | 6.39  | -2.83 | 0.00665 |
| EPHB6      | 0.24  | 9.58  | 2.83  | 0.00668 |
| HAUS8      | 0.26  | 7.66  | 2.83  | 0.00668 |
| SH3RF1     | -0.29 | 5.37  | -2.82 | 0.00671 |
| KIF13A     | -0.31 | 9.04  | -2.82 | 0.00672 |
| EIF2AK2    | -0.47 | 8.47  | -2.82 | 0.00672 |
| BICD2      | -0.29 | 9.72  | -2.82 | 0.00675 |
| TRAPPC10   | -0.35 | 8.49  | -2.82 | 0.00676 |
| SHTN1      | -0.38 | 7.29  | -2.82 | 0.00676 |
| GZMM       | 0.35  | 9.64  | 2.82  | 0.00677 |
| WAC-AS1    | 0.25  | 8.92  | 2.82  | 0.00678 |
| AC022210.1 | 0.25  | 6.30  | 2.82  | 0.00680 |
| NCKIPSD    | 0.21  | 8.19  | 2.82  | 0.00681 |
| FBXO38     | -0.27 | 8.81  | -2.82 | 0.00681 |
| TANK       | -0.30 | 8.61  | -2.82 | 0.00682 |
| CSNK1G1    | -0.21 | 7.32  | -2.82 | 0.00685 |
| RNF114     | -0.15 | 10.11 | -2.82 | 0.00686 |
| PRKCSH     | 0.21  | 12.65 | 2.82  | 0.00688 |
| TOR1B      | -0.31 | 9.04  | -2.82 | 0.00688 |
| DDA1       | 0.16  | 9.32  | 2.81  | 0.00689 |
| FNIP1      | -0.40 | 7.77  | -2.81 | 0.00689 |
| UBL4A      | 0.17  | 9.75  | 2.81  | 0.00689 |
| CSNK2B     | 0.26  | 8.03  | 2.81  | 0.00690 |
| ATP2A3     | 0.19  | 12.87 | 2.81  | 0.00690 |
| FAM76B     | -0.28 | 7.06  | -2.81 | 0.00691 |
| DAXX       | 0.17  | 10.42 | 2.81  | 0.00691 |
| MAZ        | 0.19  | 11.35 | 2.81  | 0.00692 |
| NIPSNAP2   | -0.23 | 7.62  | -2.81 | 0.00700 |
| ATAD3A     | 0.25  | 7.59  | 2.81  | 0.00700 |
| SHF        | 0.31  | 5.20  | 2.81  | 0.00701 |
| PHLDB3     | 0.32  | 6.49  | 2.81  | 0.00701 |
| LINC00294  | -0.24 | 7.25  | -2.81 | 0.00703 |
| RPL18A     | 0.35  | 14.23 | 2.81  | 0.00705 |
| NDUFB11    | 0.34  | 10.55 | 2.81  | 0.00705 |
| FLYWCH1    | 0.35  | 9.34  | 2.81  | 0.00706 |
| DGCR6      | 0.28  | 5.66  | 2.81  | 0.00706 |
| RPL31P35   | 0.31  | 5.28  | 2.81  | 0.00707 |
| METTL4     | -0.24 | 6.79  | -2.80 | 0.00707 |
| CENPJ      | -0.29 | 5.74  | -2.80 | 0.00708 |
| SKIL       | -0.28 | 6.86  | -2.80 | 0.00709 |
| ATG2B      | -0.30 | 8.11  | -2.80 | 0.00712 |
| SUCO       | -0.22 | 7.21  | -2.80 | 0.00714 |
| ARFGEF2    | -0.32 | 7.33  | -2.80 | 0.00715 |

|            |       |       |       |         |
|------------|-------|-------|-------|---------|
| RPL24      | 0.29  | 12.12 | 2.80  | 0.00716 |
| PPIP5K2    | -0.29 | 7.54  | -2.80 | 0.00719 |
| MRPL57     | 0.26  | 8.36  | 2.80  | 0.00720 |
| RC3H1      | -0.30 | 8.28  | -2.80 | 0.00720 |
| BRWD3      | -0.30 | 7.77  | -2.80 | 0.00721 |
| MTHFSD     | 0.17  | 8.17  | 2.80  | 0.00721 |
| CES2       | 0.20  | 9.70  | 2.80  | 0.00722 |
| PIGQ       | 0.25  | 8.52  | 2.80  | 0.00723 |
| RPL37      | 0.28  | 14.12 | 2.79  | 0.00731 |
| CFDP1      | 0.21  | 8.55  | 2.79  | 0.00732 |
| DMAC2      | 0.19  | 9.00  | 2.79  | 0.00733 |
| RPL13A     | 0.30  | 15.47 | 2.79  | 0.00735 |
| ATP6V0E2   | 0.31  | 9.37  | 2.79  | 0.00738 |
| RFXANK     | 0.27  | 10.36 | 2.79  | 0.00740 |
| NDUFV1     | 0.26  | 10.81 | 2.79  | 0.00741 |
| LTN1       | -0.32 | 6.47  | -2.79 | 0.00741 |
| SIGIRR     | 0.28  | 11.10 | 2.79  | 0.00741 |
| CX3CR1     | -0.32 | 11.49 | -2.79 | 0.00742 |
| EMSY       | -0.28 | 7.72  | -2.79 | 0.00743 |
| PARP14     | -0.50 | 10.47 | -2.79 | 0.00743 |
| HMGA1      | 0.27  | 10.67 | 2.79  | 0.00743 |
| SPINT2     | 0.22  | 9.39  | 2.78  | 0.00748 |
| USP24      | -0.17 | 9.74  | -2.78 | 0.00749 |
| MR1        | -0.18 | 9.14  | -2.78 | 0.00751 |
| CNOT6      | -0.20 | 7.81  | -2.78 | 0.00751 |
| LAMP2      | -0.34 | 10.59 | -2.78 | 0.00753 |
| TOX        | -0.31 | 7.24  | -2.78 | 0.00754 |
| HIPK1      | -0.35 | 9.87  | -2.78 | 0.00755 |
| ATXN1L     | -0.21 | 8.79  | -2.78 | 0.00756 |
| ACP5       | 0.31  | 9.24  | 2.78  | 0.00760 |
| NCOA3      | -0.29 | 8.77  | -2.78 | 0.00762 |
| AFF1       | -0.39 | 8.89  | -2.78 | 0.00762 |
| TMEM41A    | 0.23  | 7.76  | 2.78  | 0.00763 |
| AC024568.1 | 0.39  | 5.05  | 2.78  | 0.00764 |
| ILF3-DT    | 0.31  | 8.77  | 2.78  | 0.00766 |
| RPS11      | 0.32  | 15.34 | 2.77  | 0.00767 |
| MGAT4B     | 0.19  | 10.80 | 2.77  | 0.00769 |
| ARMCX1     | -0.34 | 5.17  | -2.77 | 0.00769 |
| CLEC7A     | -0.41 | 9.78  | -2.77 | 0.00770 |
| DNASE2     | 0.23  | 9.77  | 2.77  | 0.00770 |
| CBL        | -0.32 | 10.08 | -2.77 | 0.00771 |
| RBMX2      | 0.27  | 8.91  | 2.77  | 0.00772 |
| KPNA4      | -0.20 | 9.01  | -2.77 | 0.00773 |
| TMEM33     | -0.22 | 8.79  | -2.77 | 0.00774 |
| NRAS       | -0.25 | 7.92  | -2.77 | 0.00774 |
| JAK1       | -0.22 | 11.86 | -2.77 | 0.00775 |
| MEN1       | 0.16  | 9.59  | 2.77  | 0.00778 |
| THAP4      | 0.26  | 9.32  | 2.77  | 0.00784 |
| ZBTB2      | -0.20 | 8.15  | -2.76 | 0.00789 |
| CCDC137    | 0.23  | 8.96  | 2.76  | 0.00790 |

|            |       |       |       |         |
|------------|-------|-------|-------|---------|
| KLHL12     | -0.23 | 8.28  | -2.76 | 0.00790 |
| TRIM22     | -0.51 | 10.41 | -2.76 | 0.00791 |
| CUEDC2     | 0.25  | 9.50  | 2.76  | 0.00794 |
| PAFAH1B3   | 0.32  | 8.31  | 2.76  | 0.00794 |
| GRWD1      | 0.27  | 9.10  | 2.76  | 0.00795 |
| GNAI3      | -0.20 | 9.86  | -2.76 | 0.00795 |
| SLC31A1    | -0.24 | 8.18  | -2.76 | 0.00796 |
| CSKMT      | 0.28  | 6.32  | 2.76  | 0.00796 |
| BTBD2      | 0.19  | 10.64 | 2.76  | 0.00797 |
| AC010680.2 | -0.33 | 5.56  | -2.76 | 0.00797 |
| RPS6KB2    | 0.19  | 10.39 | 2.76  | 0.00798 |
| EIF4G3     | -0.31 | 8.80  | -2.76 | 0.00798 |
| NUP205     | -0.27 | 8.19  | -2.76 | 0.00800 |
| RNU4-62P   | 0.53  | 7.13  | 2.76  | 0.00800 |
| AC015819.1 | 0.25  | 6.80  | 2.76  | 0.00802 |
| RP9        | 0.21  | 7.21  | 2.76  | 0.00802 |
| AHNAK      | -0.25 | 13.62 | -2.76 | 0.00804 |
| SENP1      | -0.22 | 7.26  | -2.76 | 0.00806 |
| AC114271.1 | 0.24  | 5.99  | 2.76  | 0.00806 |
| PCSK1N     | 0.50  | 5.65  | 2.76  | 0.00806 |
| CXorf38    | -0.17 | 9.22  | -2.75 | 0.00811 |
| CBLL1      | -0.22 | 8.27  | -2.75 | 0.00811 |
| EEF1B2     | 0.28  | 12.35 | 2.75  | 0.00815 |
| H2BC18     | -0.40 | 5.22  | -2.75 | 0.00818 |
| AC009283.1 | -0.20 | 6.67  | -2.75 | 0.00823 |
| PLXDC2     | -0.34 | 9.60  | -2.75 | 0.00826 |
| PIK3CG     | -0.25 | 9.32  | -2.75 | 0.00827 |
| TMEM156    | 0.30  | 7.37  | 2.75  | 0.00827 |
| TRAPPC6B   | -0.19 | 7.38  | -2.75 | 0.00827 |
| GAB1       | -0.32 | 6.58  | -2.75 | 0.00827 |
| MICOS13    | 0.33  | 8.16  | 2.75  | 0.00830 |
| TP53INP1   | -0.36 | 8.90  | -2.74 | 0.00831 |
| AL136454.1 | 0.35  | 6.64  | 2.74  | 0.00831 |
| REEP6      | 0.28  | 6.30  | 2.74  | 0.00834 |
| SLC25A40   | -0.27 | 6.84  | -2.74 | 0.00835 |
| MAL        | 0.45  | 9.67  | 2.74  | 0.00835 |
| CCNT2      | -0.30 | 7.74  | -2.74 | 0.00837 |
| U2SURP     | -0.17 | 8.76  | -2.74 | 0.00837 |
| TNKS       | -0.21 | 7.88  | -2.74 | 0.00838 |
| ECI1       | 0.28  | 8.16  | 2.74  | 0.00839 |
| HMOX2      | 0.23  | 10.60 | 2.74  | 0.00840 |
| NCAPH2     | 0.22  | 9.24  | 2.74  | 0.00840 |
| FGD5-AS1   | -0.26 | 9.20  | -2.74 | 0.00841 |
| RLIM       | -0.22 | 8.26  | -2.74 | 0.00841 |
| WEE2-AS1   | 0.35  | 5.44  | 2.74  | 0.00841 |
| FMNL2      | -0.35 | 5.19  | -2.74 | 0.00841 |
| RPL32      | 0.29  | 14.20 | 2.74  | 0.00844 |
| AC111170.1 | 0.42  | 5.16  | 2.74  | 0.00844 |
| GAREM2     | 0.31  | 6.16  | 2.74  | 0.00845 |
| SNRK       | -0.33 | 9.58  | -2.74 | 0.00850 |

|            |       |       |       |         |
|------------|-------|-------|-------|---------|
| IFITM9P    | -0.40 | 5.22  | -2.74 | 0.00850 |
| GOLGA5     | -0.21 | 7.72  | -2.74 | 0.00851 |
| FCHO2      | -0.39 | 6.81  | -2.73 | 0.00853 |
| RPS2       | 0.32  | 15.01 | 2.73  | 0.00853 |
| EIF3K      | 0.27  | 11.78 | 2.73  | 0.00854 |
| AC090114.1 | 0.35  | 6.62  | 2.73  | 0.00854 |
| BAZ2A      | -0.25 | 11.33 | -2.73 | 0.00856 |
| SHMT2      | 0.23  | 10.11 | 2.73  | 0.00857 |
| SELENOF    | -0.18 | 9.57  | -2.73 | 0.00858 |
| SAT1       | -0.34 | 11.88 | -2.73 | 0.00858 |
| MYD88      | -0.27 | 11.54 | -2.73 | 0.00858 |
| FAM160B1   | -0.31 | 7.81  | -2.73 | 0.00858 |
| INSIG1     | -0.23 | 8.67  | -2.73 | 0.00859 |
| CCDC85B    | 0.43  | 8.11  | 2.73  | 0.00861 |
| CBX6       | 0.17  | 10.18 | 2.73  | 0.00862 |
| PALLD      | -0.30 | 6.16  | -2.73 | 0.00863 |
| BOLA1      | 0.26  | 7.11  | 2.73  | 0.00863 |
| KCTD18     | -0.18 | 8.02  | -2.73 | 0.00864 |
| ANKRD39    | 0.22  | 6.04  | 2.73  | 0.00865 |
| WDFY1      | -0.29 | 7.14  | -2.73 | 0.00867 |
| PHB        | 0.24  | 10.16 | 2.73  | 0.00867 |
| FAM91A1    | -0.26 | 8.00  | -2.73 | 0.00867 |
| AC133134.1 | 0.35  | 6.04  | 2.73  | 0.00868 |
| HSD11B1L   | 0.30  | 5.43  | 2.73  | 0.00871 |
| IPO8       | -0.20 | 8.23  | -2.73 | 0.00872 |
| AAAS       | 0.20  | 9.26  | 2.73  | 0.00873 |
| ZDHHC6     | -0.17 | 8.29  | -2.73 | 0.00873 |
| CYP2D6     | -0.43 | 5.86  | -2.73 | 0.00873 |
| RBBP4      | -0.15 | 9.67  | -2.73 | 0.00874 |
| LONRF1     | -0.26 | 6.72  | -2.73 | 0.00874 |
| SAP130     | -0.16 | 9.01  | -2.73 | 0.00874 |
| NOTCH2     | -0.41 | 10.85 | -2.72 | 0.00876 |
| EYA3       | -0.16 | 8.31  | -2.72 | 0.00878 |
| M6PR       | -0.19 | 10.10 | -2.72 | 0.00879 |
| MAP3K2     | -0.28 | 9.05  | -2.72 | 0.00880 |
| PHACTR2    | -0.24 | 7.15  | -2.72 | 0.00880 |
| ERGIC3     | 0.24  | 11.51 | 2.72  | 0.00882 |
| DRAIC      | -0.30 | 5.48  | -2.72 | 0.00885 |
| TRPT1      | 0.21  | 8.20  | 2.72  | 0.00885 |
| HPS3       | -0.22 | 7.93  | -2.72 | 0.00887 |
| ZNF24      | -0.14 | 9.16  | -2.72 | 0.00889 |
| CGGBP1     | -0.17 | 9.33  | -2.72 | 0.00889 |
| WDR60      | 0.39  | 8.53  | 2.72  | 0.00892 |
| RUVBL2     | 0.24  | 9.58  | 2.72  | 0.00893 |
| PAPSS2     | -0.29 | 5.86  | -2.72 | 0.00894 |
| BCAT2      | 0.25  | 8.38  | 2.72  | 0.00894 |
| PSMD8      | 0.23  | 10.67 | 2.72  | 0.00895 |
| MRPS26     | 0.20  | 8.38  | 2.72  | 0.00896 |
| EMC10      | 0.24  | 10.39 | 2.72  | 0.00897 |
| CD47       | -0.19 | 9.83  | -2.72 | 0.00897 |

|            |       |       |       |         |
|------------|-------|-------|-------|---------|
| CALM3      | 0.19  | 12.95 | 2.72  | 0.00898 |
| AC087343.1 | 0.36  | 7.18  | 2.71  | 0.00902 |
| MAP3K5     | -0.30 | 9.27  | -2.71 | 0.00902 |
| ECPAS      | -0.16 | 9.33  | -2.71 | 0.00903 |
| TMEM106B   | -0.27 | 6.93  | -2.71 | 0.00905 |
| TIPRL      | -0.23 | 7.44  | -2.71 | 0.00906 |
| NBPF3      | -0.35 | 6.22  | -2.71 | 0.00906 |
| ZDHHC17    | -0.34 | 7.39  | -2.71 | 0.00907 |
| SIGLEC14   | -0.93 | 9.39  | -2.71 | 0.00908 |
| CSGALNACT2 | -0.42 | 8.27  | -2.71 | 0.00909 |
| RPS28      | 0.37  | 12.96 | 2.71  | 0.00911 |
| C1orf56    | 0.23  | 5.96  | 2.71  | 0.00913 |
| TOMM40     | 0.24  | 8.77  | 2.71  | 0.00915 |
| ZNF236     | -0.31 | 6.86  | -2.71 | 0.00915 |
| HRAS       | 0.26  | 7.74  | 2.71  | 0.00918 |
| MAPK1      | -0.26 | 11.01 | -2.71 | 0.00920 |
| CRIP2      | 0.56  | 8.21  | 2.70  | 0.00923 |
| KRI1       | 0.24  | 10.15 | 2.70  | 0.00926 |
| PJA2       | -0.29 | 9.27  | -2.70 | 0.00926 |
| CENPB      | 0.26  | 10.24 | 2.70  | 0.00927 |
| FBXL5      | -0.32 | 10.78 | -2.70 | 0.00928 |
| ERI3       | 0.21  | 8.11  | 2.70  | 0.00936 |
| ITCH       | -0.30 | 8.61  | -2.70 | 0.00938 |
| TASOR      | -0.20 | 8.84  | -2.70 | 0.00940 |
| SH3GL1     | 0.23  | 9.98  | 2.70  | 0.00944 |
| RHOF       | 0.21  | 10.81 | 2.70  | 0.00946 |
| PHB2       | 0.22  | 11.52 | 2.69  | 0.00948 |
| DCTPP1     | 0.26  | 8.20  | 2.69  | 0.00949 |
| NUP153     | -0.33 | 8.78  | -2.69 | 0.00950 |
| RPL21P93   | 0.28  | 8.38  | 2.69  | 0.00952 |
| UBR2       | -0.31 | 10.15 | -2.69 | 0.00952 |
| RPL10      | 0.31  | 15.55 | 2.69  | 0.00953 |
| SP3        | -0.27 | 9.13  | -2.69 | 0.00955 |
| MCFD2      | -0.23 | 8.00  | -2.69 | 0.00957 |
| NBEAL1     | 0.32  | 5.27  | 2.69  | 0.00958 |
| CBWD4P     | -0.27 | 5.19  | -2.69 | 0.00963 |
| SPAST      | -0.27 | 7.17  | -2.69 | 0.00968 |
| PRPF39     | -0.26 | 6.62  | -2.69 | 0.00968 |
| PRPF4B     | -0.21 | 8.96  | -2.69 | 0.00971 |
| JUND       | 0.24  | 11.24 | 2.69  | 0.00972 |
| MORC2      | 0.18  | 9.73  | 2.69  | 0.00972 |
| STRN3      | -0.33 | 6.42  | -2.68 | 0.00973 |
| BTBD1      | -0.21 | 8.01  | -2.68 | 0.00975 |
| SNHG6      | 0.25  | 10.47 | 2.68  | 0.00975 |
| PARG       | -0.20 | 7.43  | -2.68 | 0.00976 |
| PARP4      | -0.26 | 9.95  | -2.68 | 0.00976 |
| ADCK2      | 0.23  | 8.51  | 2.68  | 0.00977 |
| AC109446.3 | 0.34  | 4.98  | 2.68  | 0.00979 |
| RPS19P3    | 0.40  | 9.15  | 2.68  | 0.00981 |
| RPS10      | 0.36  | 6.78  | 2.68  | 0.00982 |



|            |       |       |       |         |
|------------|-------|-------|-------|---------|
| USP20      | 0.16  | 10.71 | 2.68  | 0.00982 |
| PLAGL2     | -0.22 | 9.36  | -2.68 | 0.00984 |
| APBA3      | 0.21  | 8.58  | 2.68  | 0.00988 |
| PIKFYVE    | -0.34 | 7.62  | -2.68 | 0.00990 |
| SLC15A4    | -0.29 | 9.96  | -2.68 | 0.00991 |
| EBLN3P     | -0.29 | 8.17  | -2.68 | 0.00995 |
| RPS6       | 0.26  | 14.51 | 2.68  | 0.00996 |
| VPS13B     | -0.30 | 8.37  | -2.68 | 0.00996 |
| TMEM123    | -0.32 | 10.27 | -2.68 | 0.00996 |
| FAM98C     | 0.24  | 8.19  | 2.67  | 0.00999 |
| SMG1       | -0.29 | 9.28  | -2.67 | 0.00999 |
| WDR13      | 0.21  | 9.79  | 2.67  | 0.00999 |
| GTF2A1     | -0.22 | 7.80  | -2.67 | 0.00999 |
| SLC10A3    | 0.17  | 9.15  | 2.67  | 0.01000 |
| ARHGEF18   | 0.18  | 10.97 | 2.67  | 0.01001 |
| SLC25A1    | 0.30  | 9.38  | 2.67  | 0.01001 |
| OSBPL1A    | -0.30 | 6.17  | -2.67 | 0.01003 |
| HGSNAT     | -0.16 | 9.83  | -2.67 | 0.01003 |
| NARS1      | -0.17 | 9.36  | -2.67 | 0.01004 |
| RPL4       | 0.26  | 14.76 | 2.67  | 0.01006 |
| AC134407.2 | 0.42  | 5.52  | 2.67  | 0.01009 |
| CHURC1     | -0.34 | 9.12  | -2.67 | 0.01009 |
| USF2       | 0.16  | 11.62 | 2.67  | 0.01011 |
| MED13      | -0.25 | 8.20  | -2.67 | 0.01011 |
| NDUFA3     | 0.33  | 9.48  | 2.67  | 0.01014 |
| SP1        | -0.23 | 10.59 | -2.67 | 0.01015 |
| RPL26      | 0.36  | 10.31 | 2.67  | 0.01015 |
| NAPSB      | 0.48  | 10.58 | 2.67  | 0.01017 |
| PNPLA8     | -0.24 | 7.77  | -2.67 | 0.01020 |
| RAB11B     | 0.22  | 11.26 | 2.67  | 0.01021 |
| DDX54      | 0.20  | 10.12 | 2.67  | 0.01021 |
| JKAMP      | -0.19 | 7.91  | -2.67 | 0.01021 |
| WDR18      | 0.33  | 8.51  | 2.67  | 0.01022 |
| ANKRD50    | -0.27 | 5.70  | -2.67 | 0.01023 |
| PDLIM1     | 0.29  | 9.43  | 2.66  | 0.01025 |
| AC048382.5 | 0.26  | 5.68  | 2.66  | 0.01025 |
| ZNF518A    | -0.30 | 6.94  | -2.66 | 0.01026 |
| CD79B      | 0.43  | 9.97  | 2.66  | 0.01028 |
| ELAC1      | 0.24  | 5.97  | 2.66  | 0.01029 |
| CIB1       | 0.26  | 10.66 | 2.66  | 0.01030 |
| CHD4       | 0.28  | 8.99  | 2.66  | 0.01030 |
| DUS1L      | 0.20  | 10.30 | 2.66  | 0.01032 |
| LINC00852  | 0.22  | 6.06  | 2.66  | 0.01032 |
| SNRPB      | 0.23  | 10.47 | 2.66  | 0.01032 |
| AL031985.2 | 0.24  | 5.17  | 2.66  | 0.01033 |
| VPS28      | 0.25  | 11.31 | 2.66  | 0.01033 |
| EVA1C      | 0.28  | 7.06  | 2.66  | 0.01035 |
| RPSAP17    | 0.22  | 5.55  | 2.66  | 0.01035 |
| ACTR2      | -0.25 | 11.41 | -2.66 | 0.01036 |
| HADHB      | -0.16 | 9.81  | -2.66 | 0.01036 |

|            |       |       |       |         |
|------------|-------|-------|-------|---------|
| AC046185.3 | 0.23  | 8.89  | 2.66  | 0.01040 |
| CLASP2     | -0.27 | 7.43  | -2.66 | 0.01041 |
| TBL3       | 0.23  | 9.13  | 2.66  | 0.01041 |
| SARS1      | 0.17  | 11.19 | 2.66  | 0.01043 |
| EDEM3      | -0.33 | 7.36  | -2.66 | 0.01043 |
| ZNHIT1     | 0.25  | 9.86  | 2.66  | 0.01043 |
| AIP        | 0.22  | 10.98 | 2.66  | 0.01044 |
| ATP2A2     | -0.23 | 9.47  | -2.66 | 0.01044 |
| MPV17L2    | 0.27  | 7.47  | 2.66  | 0.01047 |
| KPNA6      | 0.21  | 9.97  | 2.66  | 0.01049 |
| MICU2      | -0.21 | 7.94  | -2.66 | 0.01051 |
| ARRDC4     | -0.27 | 7.00  | -2.65 | 0.01052 |
| PPP3CB-AS1 | -0.21 | 6.61  | -2.65 | 0.01052 |
| DMAC1      | 0.23  | 8.17  | 2.65  | 0.01054 |
| HGH1       | 0.25  | 8.73  | 2.65  | 0.01058 |
| PIN1       | 0.21  | 9.30  | 2.65  | 0.01060 |
| LSM2       | 0.25  | 8.44  | 2.65  | 0.01060 |
| GMEB2      | 0.14  | 9.25  | 2.65  | 0.01061 |
| SAMD9L     | -0.51 | 8.84  | -2.65 | 0.01062 |
| APRT       | 0.30  | 10.78 | 2.65  | 0.01063 |
| GMDS       | 0.23  | 7.84  | 2.65  | 0.01065 |
| LDLRAP1    | 0.26  | 11.33 | 2.65  | 0.01065 |
| TMSB4XP4   | 0.34  | 6.99  | 2.65  | 0.01066 |
| NCAPH      | -0.24 | 5.60  | -2.65 | 0.01066 |
| ERP29      | 0.24  | 11.83 | 2.65  | 0.01066 |
| FCGR2C     | -0.39 | 8.04  | -2.65 | 0.01068 |
| TRIM28     | 0.19  | 12.13 | 2.65  | 0.01071 |
| EMD        | 0.21  | 10.00 | 2.65  | 0.01072 |
| MVD        | 0.26  | 8.67  | 2.65  | 0.01072 |
| KCTD17     | 0.22  | 8.17  | 2.65  | 0.01072 |
| RPS8       | 0.30  | 14.81 | 2.65  | 0.01074 |
| FBXO46     | 0.16  | 8.52  | 2.65  | 0.01075 |
| ATP8B4     | -0.26 | 6.64  | -2.65 | 0.01076 |
| PTPRC      | -0.37 | 12.52 | -2.65 | 0.01078 |
| ITGA4      | -0.22 | 10.12 | -2.65 | 0.01079 |
| INCENP     | -0.28 | 7.03  | -2.64 | 0.01081 |
| SORBS3     | 0.32  | 9.48  | 2.64  | 0.01084 |
| HMG20B     | 0.20  | 9.98  | 2.64  | 0.01084 |
| MEFV       | -0.40 | 10.97 | -2.64 | 0.01085 |
| DNAJC30    | 0.25  | 7.05  | 2.64  | 0.01086 |
| ZFYVE26    | -0.18 | 8.89  | -2.64 | 0.01086 |
| IL2RG      | 0.32  | 11.33 | 2.64  | 0.01088 |
| ATF7IP     | -0.18 | 9.43  | -2.64 | 0.01089 |
| AC027031.2 | 0.27  | 5.17  | 2.64  | 0.01090 |
| PYCR3      | 0.32  | 6.53  | 2.64  | 0.01090 |
| PRR14L     | -0.21 | 8.93  | -2.64 | 0.01090 |
| AC005899.7 | 0.34  | 5.37  | 2.64  | 0.01094 |
| AC007406.5 | -0.28 | 6.98  | -2.64 | 0.01096 |
| SLC39A4    | 0.28  | 7.19  | 2.64  | 0.01097 |
| STAT2      | -0.40 | 10.75 | -2.64 | 0.01097 |

|            |       |       |       |         |
|------------|-------|-------|-------|---------|
| IMPDH2     | 0.20  | 10.25 | 2.64  | 0.01098 |
| SNX13      | -0.28 | 7.36  | -2.64 | 0.01100 |
| NME3       | 0.28  | 8.31  | 2.64  | 0.01101 |
| FOXP1      | 0.28  | 9.78  | 2.64  | 0.01101 |
| MOB2       | 0.21  | 9.80  | 2.64  | 0.01103 |
| CERT1      | -0.23 | 8.37  | -2.64 | 0.01103 |
| SMG9       | 0.20  | 9.23  | 2.64  | 0.01105 |
| TADA1      | -0.23 | 6.80  | -2.64 | 0.01106 |
| TCF7L2     | -0.30 | 7.77  | -2.64 | 0.01107 |
| TOP1MT     | 0.25  | 8.73  | 2.63  | 0.01108 |
| SLC39A3    | 0.24  | 8.14  | 2.63  | 0.01110 |
| TCERG1     | -0.26 | 7.90  | -2.63 | 0.01111 |
| RPL27A     | 0.30  | 13.98 | 2.63  | 0.01113 |
| CD3E       | 0.33  | 13.13 | 2.63  | 0.01116 |
| AC006538.1 | 0.29  | 5.01  | 2.63  | 0.01119 |
| INKA1      | 0.30  | 6.15  | 2.63  | 0.01119 |
| AL096865.1 | -0.27 | 5.27  | -2.63 | 0.01122 |
| DAPK3      | 0.20  | 9.14  | 2.63  | 0.01122 |
| SYNJ1      | -0.34 | 7.28  | -2.63 | 0.01124 |
| COX6B1     | 0.29  | 11.60 | 2.63  | 0.01124 |
| CC2D1A     | 0.21  | 9.22  | 2.63  | 0.01126 |
| ILVBL      | 0.24  | 8.47  | 2.63  | 0.01126 |
| AMDHD2     | 0.31  | 8.56  | 2.63  | 0.01126 |
| SNTB1      | -0.22 | 7.57  | -2.63 | 0.01129 |
| ATP5ME     | 0.30  | 9.42  | 2.63  | 0.01131 |
| R3HCC1     | 0.25  | 8.97  | 2.63  | 0.01132 |
| DDX27      | 0.15  | 10.11 | 2.63  | 0.01132 |
| INTS5      | 0.20  | 8.96  | 2.63  | 0.01133 |
| STK11      | 0.18  | 10.15 | 2.63  | 0.01136 |
| TENT2      | -0.23 | 8.21  | -2.62 | 0.01139 |
| OLFM2      | 0.27  | 7.49  | 2.62  | 0.01143 |
| LDHB       | 0.41  | 8.14  | 2.62  | 0.01144 |
| REV3L      | -0.26 | 7.02  | -2.62 | 0.01144 |
| SHISAL2A   | 0.30  | 7.27  | 2.62  | 0.01144 |
| TIA1       | -0.29 | 8.25  | -2.62 | 0.01145 |
| DYRK1A     | -0.26 | 9.17  | -2.62 | 0.01147 |
| LINC01948  | -0.31 | 6.23  | -2.62 | 0.01149 |
| BRWD1      | -0.19 | 8.01  | -2.62 | 0.01151 |
| POLD1      | 0.23  | 8.30  | 2.62  | 0.01152 |
| FAM199X    | -0.23 | 7.39  | -2.62 | 0.01152 |
| NDUFB4     | 0.18  | 9.25  | 2.62  | 0.01153 |
| MAP3K8     | -0.24 | 8.26  | -2.62 | 0.01155 |
| TET3       | -0.35 | 8.99  | -2.62 | 0.01156 |
| MYL9       | 0.75  | 9.38  | 2.62  | 0.01156 |
| FBXW11     | -0.20 | 8.29  | -2.62 | 0.01159 |
| BTA1F1     | -0.38 | 7.41  | -2.62 | 0.01161 |
| PTAR1      | -0.27 | 7.21  | -2.62 | 0.01163 |
| PI16       | 0.43  | 7.68  | 2.62  | 0.01164 |
| C2orf81    | 0.27  | 5.02  | 2.62  | 0.01164 |
| AC064847.1 | 0.38  | 5.07  | 2.61  | 0.01166 |

|            |       |       |       |         |
|------------|-------|-------|-------|---------|
| AC005912.1 | 0.40  | 10.17 | 2.61  | 0.01167 |
| MRPL11     | 0.23  | 8.19  | 2.61  | 0.01167 |
| ZMIZ1      | -0.32 | 10.17 | -2.61 | 0.01167 |
| ARHGDIA    | 0.26  | 12.37 | 2.61  | 0.01168 |
| RALGAPB    | -0.21 | 8.82  | -2.61 | 0.01170 |
| PRKCE      | -0.36 | 6.67  | -2.61 | 0.01171 |
| AL355816.2 | 0.36  | 6.99  | 2.61  | 0.01171 |
| MRPL55     | 0.21  | 8.44  | 2.61  | 0.01173 |
| LINC02555  | -0.33 | 5.09  | -2.61 | 0.01173 |
| BABAM1     | 0.26  | 8.76  | 2.61  | 0.01174 |
| XPO1       | -0.21 | 9.35  | -2.61 | 0.01174 |
| ZNF341     | 0.20  | 7.96  | 2.61  | 0.01174 |
| NHSL1      | -0.30 | 5.15  | -2.61 | 0.01176 |
| RNF187     | 0.26  | 11.08 | 2.61  | 0.01178 |
| FAM89B     | 0.29  | 7.91  | 2.61  | 0.01183 |
| AP001024.1 | 0.36  | 9.11  | 2.61  | 0.01183 |
| TBC1D17    | 0.20  | 10.25 | 2.61  | 0.01184 |
| PHF2       | -0.33 | 9.12  | -2.61 | 0.01184 |
| CRIM1      | -0.32 | 5.50  | -2.61 | 0.01185 |
| AC131392.2 | -0.61 | 6.47  | -2.61 | 0.01186 |
| ANTXR2     | -0.22 | 9.71  | -2.61 | 0.01186 |
| ZFP36L2    | -0.18 | 12.27 | -2.61 | 0.01187 |
| GTF2H5     | 0.25  | 7.56  | 2.61  | 0.01189 |
| HECA       | -0.25 | 9.84  | -2.61 | 0.01189 |
| PHACTR4    | 0.24  | 8.53  | 2.61  | 0.01192 |
| DDX60      | -0.45 | 7.70  | -2.61 | 0.01192 |
| PVR        | -0.25 | 7.20  | -2.61 | 0.01192 |
| TRPM4      | 0.31  | 6.18  | 2.61  | 0.01193 |
| ZGLP1      | 0.29  | 5.85  | 2.61  | 0.01193 |
| MBD1       | -0.14 | 10.08 | -2.61 | 0.01194 |
| TAF2       | -0.29 | 6.69  | -2.61 | 0.01196 |
| AC007683.1 | 0.29  | 6.61  | 2.61  | 0.01196 |
| AQP3       | 0.35  | 9.79  | 2.60  | 0.01198 |
| SLC30A1    | -0.23 | 7.44  | -2.60 | 0.01198 |
| GRAMD1B    | -0.30 | 7.82  | -2.60 | 0.01199 |
| NUDT1      | 0.31  | 8.66  | 2.60  | 0.01200 |
| NAT14      | 0.24  | 6.12  | 2.60  | 0.01200 |
| BTBD3      | -0.28 | 5.59  | -2.60 | 0.01202 |
| RABEP2     | 0.33  | 8.50  | 2.60  | 0.01203 |
| SRGAP2B    | -0.30 | 5.82  | -2.60 | 0.01205 |
| C5orf51    | -0.18 | 7.26  | -2.60 | 0.01205 |
| LAGE3      | 0.33  | 8.07  | 2.60  | 0.01206 |
| RPS27      | 0.33  | 14.52 | 2.60  | 0.01207 |
| PARL       | 0.27  | 7.29  | 2.60  | 0.01207 |
| RPS16      | 0.28  | 14.09 | 2.60  | 0.01210 |
| TLR6       | -0.29 | 9.13  | -2.60 | 0.01212 |
| DZIP3      | -0.25 | 6.89  | -2.60 | 0.01212 |
| NBR1       | -0.21 | 10.24 | -2.60 | 0.01214 |
| SPHK2      | 0.21  | 8.00  | 2.60  | 0.01215 |
| CD5        | 0.26  | 11.13 | 2.60  | 0.01217 |

|            |       |       |       |         |
|------------|-------|-------|-------|---------|
| ITGB1      | -0.34 | 9.41  | -2.60 | 0.01218 |
| UBXN2B     | -0.34 | 8.86  | -2.60 | 0.01218 |
| ORAI1      | 0.20  | 10.68 | 2.60  | 0.01220 |
| B3GALT4    | 0.26  | 8.96  | 2.60  | 0.01221 |
| CCR7       | 0.39  | 11.93 | 2.60  | 0.01227 |
| EIF2D      | 0.16  | 9.26  | 2.59  | 0.01232 |
| AL357033.4 | 0.27  | 7.62  | 2.59  | 0.01233 |
| KDM3A      | -0.20 | 9.71  | -2.59 | 0.01233 |
| PPP2CB     | -0.20 | 7.99  | -2.59 | 0.01235 |
| TCEA2      | 0.24  | 8.08  | 2.59  | 0.01235 |
| TRADD      | 0.20  | 9.81  | 2.59  | 0.01238 |
| TSTD1      | 0.21  | 8.57  | 2.59  | 0.01239 |
| RPL12      | 0.29  | 13.44 | 2.59  | 0.01242 |
| RAD23A     | 0.23  | 10.96 | 2.59  | 0.01243 |
| GIMAP1     | 0.23  | 10.47 | 2.59  | 0.01248 |
| IRS1       | -0.34 | 5.64  | -2.59 | 0.01251 |
| RPGRIP1L   | -0.32 | 5.00  | -2.59 | 0.01252 |
| PPP1R15B   | -0.33 | 8.40  | -2.59 | 0.01253 |
| RPS20P2    | 0.34  | 5.36  | 2.59  | 0.01255 |
| NBPF1      | -0.31 | 7.25  | -2.59 | 0.01256 |
| RPL23AP42  | 0.35  | 10.05 | 2.59  | 0.01257 |
| AC073957.3 | -0.34 | 5.69  | -2.59 | 0.01257 |
| TRAF2      | 0.23  | 8.44  | 2.59  | 0.01258 |
| RPL3P4     | 0.37  | 10.89 | 2.59  | 0.01259 |
| SLMAP      | -0.30 | 7.78  | -2.58 | 0.01263 |
| SOAT1      | -0.22 | 8.94  | -2.58 | 0.01265 |
| TBC1D7     | 0.21  | 7.18  | 2.58  | 0.01268 |
| NCBP3      | -0.15 | 9.32  | -2.58 | 0.01268 |
| MTA1       | 0.19  | 9.47  | 2.58  | 0.01270 |
| CPNE3      | -0.21 | 8.26  | -2.58 | 0.01271 |
| CEP85      | -0.20 | 7.77  | -2.58 | 0.01271 |
| VPS4B      | -0.22 | 9.48  | -2.58 | 0.01273 |
| ATG101     | 0.23  | 8.82  | 2.58  | 0.01274 |
| IFI27L2    | 0.34  | 8.35  | 2.58  | 0.01275 |
| SGMS1      | -0.29 | 7.22  | -2.58 | 0.01277 |
| NAXE       | 0.28  | 9.22  | 2.58  | 0.01277 |
| PRPF6      | 0.21  | 11.70 | 2.58  | 0.01278 |
| TXNDC16    | -0.24 | 5.78  | -2.58 | 0.01281 |
| SLAIN2     | -0.18 | 8.36  | -2.58 | 0.01282 |
| C1orf122   | 0.29  | 7.64  | 2.58  | 0.01282 |
| PSPN       | 0.19  | 6.19  | 2.58  | 0.01282 |
| COX7C      | 0.27  | 11.18 | 2.58  | 0.01283 |
| FPGS       | 0.22  | 9.41  | 2.58  | 0.01283 |
| CHMP4A     | 0.35  | 6.18  | 2.58  | 0.01284 |
| MUL1       | 0.19  | 9.41  | 2.58  | 0.01285 |
| RPL4P2     | 0.23  | 5.50  | 2.58  | 0.01288 |
| STK24P1    | -0.28 | 5.25  | -2.58 | 0.01290 |
| KAT5       | 0.13  | 10.03 | 2.57  | 0.01292 |
| CD2BP2     | 0.17  | 10.93 | 2.57  | 0.01295 |
| AL355309.1 | 0.56  | 8.42  | 2.57  | 0.01296 |

|           |       |       |       |         |
|-----------|-------|-------|-------|---------|
| TMEM115   | 0.19  | 9.62  | 2.57  | 0.01298 |
| TIPARP    | -0.29 | 7.51  | -2.57 | 0.01301 |
| CLUAP1    | 0.26  | 7.04  | 2.57  | 0.01302 |
| MAT2A     | -0.17 | 9.77  | -2.57 | 0.01303 |
| ERO1B     | -0.24 | 6.34  | -2.57 | 0.01307 |
| TMEM222   | 0.20  | 9.78  | 2.57  | 0.01308 |
| FAAP20    | 0.23  | 8.50  | 2.57  | 0.01308 |
| NBPF8     | -0.38 | 7.71  | -2.57 | 0.01310 |
| TONSL     | 0.25  | 6.45  | 2.57  | 0.01311 |
| GABPA     | -0.26 | 6.81  | -2.57 | 0.01311 |
| UPF3B     | 0.27  | 7.81  | 2.57  | 0.01313 |
| RAB40C    | 0.20  | 8.55  | 2.57  | 0.01314 |
| MAPK8     | -0.16 | 7.43  | -2.57 | 0.01314 |
| MARCKSL1  | 0.21  | 9.82  | 2.57  | 0.01315 |
| TMEM160   | 0.31  | 7.11  | 2.57  | 0.01315 |
| NCOA2     | -0.41 | 8.26  | -2.57 | 0.01316 |
| FEM1C     | -0.26 | 7.33  | -2.57 | 0.01317 |
| XPO4      | -0.22 | 7.07  | -2.57 | 0.01318 |
| PPP1R13L  | 0.23  | 6.09  | 2.57  | 0.01318 |
| DNAJC4    | 0.23  | 10.13 | 2.57  | 0.01322 |
| B4GALT7   | 0.24  | 8.74  | 2.57  | 0.01322 |
| ASAP1-IT2 | 0.45  | 6.09  | 2.57  | 0.01323 |
| TMEM39B   | 0.18  | 8.84  | 2.57  | 0.01324 |
| ANTKMT    | 0.28  | 6.67  | 2.57  | 0.01324 |
| SMAD1     | -0.27 | 5.55  | -2.56 | 0.01327 |
| KLF16     | 0.21  | 9.04  | 2.56  | 0.01327 |
| RBM39     | -0.23 | 10.94 | -2.56 | 0.01332 |
| TSTA3     | 0.24  | 10.11 | 2.56  | 0.01335 |
| LIG4      | -0.31 | 6.08  | -2.56 | 0.01336 |
| PPP1R3D   | -0.35 | 8.13  | -2.56 | 0.01338 |
| AHCYL2    | -0.23 | 7.03  | -2.56 | 0.01339 |
| PGBD2     | -0.22 | 6.98  | -2.56 | 0.01342 |
| GTF2H2C   | -0.27 | 5.82  | -2.56 | 0.01344 |
| ZBTB9     | 0.19  | 7.31  | 2.56  | 0.01345 |
| GMFB      | -0.25 | 7.09  | -2.56 | 0.01346 |
| GPR34     | -0.35 | 5.36  | -2.56 | 0.01347 |
| ASLP1     | 0.31  | 5.19  | 2.56  | 0.01347 |
| ZNF10     | 0.22  | 5.78  | 2.56  | 0.01348 |
| GCDH      | 0.21  | 8.51  | 2.56  | 0.01348 |
| ZNF671    | 0.17  | 8.29  | 2.56  | 0.01350 |
| TUT7      | -0.31 | 9.36  | -2.56 | 0.01351 |
| TMEM102   | 0.22  | 8.11  | 2.56  | 0.01352 |
| ABHD14A   | 0.29  | 7.12  | 2.56  | 0.01352 |
| ZNF585A   | -0.26 | 5.91  | -2.56 | 0.01353 |
| ZDHHC12   | 0.25  | 9.50  | 2.56  | 0.01354 |
| RAB22A    | -0.17 | 8.45  | -2.56 | 0.01358 |
| NR2C2     | -0.36 | 8.40  | -2.56 | 0.01359 |
| KLF3      | -0.29 | 9.79  | -2.56 | 0.01359 |
| ATP6V1B2  | -0.25 | 12.08 | -2.55 | 0.01360 |
| RPL7A     | 0.25  | 14.34 | 2.55  | 0.01366 |

|            |       |       |       |         |
|------------|-------|-------|-------|---------|
| RDH11      | 0.27  | 8.87  | 2.55  | 0.01367 |
| MMD        | -0.34 | 7.87  | -2.55 | 0.01367 |
| SEC31A     | -0.16 | 9.92  | -2.55 | 0.01368 |
| ATP2B4     | -0.27 | 10.15 | -2.55 | 0.01369 |
| CCDC117    | -0.23 | 7.68  | -2.55 | 0.01369 |
| SURF2      | 0.26  | 7.92  | 2.55  | 0.01372 |
| FBXL19     | 0.22  | 8.23  | 2.55  | 0.01372 |
| PA2G4      | 0.22  | 10.53 | 2.55  | 0.01373 |
| FBXL18     | 0.17  | 8.41  | 2.55  | 0.01373 |
| ENDOG      | 0.32  | 7.33  | 2.55  | 0.01374 |
| WDR25      | 0.20  | 7.43  | 2.55  | 0.01374 |
| CLTC       | -0.19 | 10.64 | -2.55 | 0.01376 |
| TDRD7      | -0.29 | 8.09  | -2.55 | 0.01376 |
| BDH1       | 0.26  | 7.74  | 2.55  | 0.01377 |
| AC011495.1 | 0.32  | 7.60  | 2.55  | 0.01378 |
| FMO5       | -0.21 | 6.09  | -2.55 | 0.01378 |
| RHOQ       | -0.19 | 8.91  | -2.55 | 0.01379 |
| MEST       | -0.31 | 5.45  | -2.55 | 0.01380 |
| TNKS2      | -0.26 | 8.41  | -2.55 | 0.01380 |
| POLD3      | -0.19 | 7.69  | -2.55 | 0.01382 |
| RASAL3     | 0.19  | 11.45 | 2.55  | 0.01383 |
| AC241585.2 | 0.21  | 5.08  | 2.55  | 0.01393 |
| TRANK1     | -0.25 | 11.59 | -2.55 | 0.01394 |
| TAB1       | 0.16  | 9.38  | 2.54  | 0.01395 |
| STK3       | -0.32 | 6.20  | -2.54 | 0.01395 |
| CCDC85C    | 0.30  | 6.95  | 2.54  | 0.01395 |
| KPNB1      | -0.25 | 11.55 | -2.54 | 0.01396 |
| TBC1D2B    | -0.21 | 9.94  | -2.54 | 0.01396 |
| FBLN7      | 0.33  | 6.27  | 2.54  | 0.01397 |
| SMARCAD1   | -0.23 | 6.88  | -2.54 | 0.01401 |
| TOMM7      | 0.29  | 11.43 | 2.54  | 0.01402 |
| PRXL2B     | 0.23  | 8.76  | 2.54  | 0.01403 |
| TTF2       | -0.23 | 7.07  | -2.54 | 0.01403 |
| AL669983.1 | 0.30  | 7.85  | 2.54  | 0.01405 |
| RPL13AP7   | 0.33  | 8.13  | 2.54  | 0.01406 |
| RESF1      | -0.37 | 10.88 | -2.54 | 0.01407 |
| CDKN2B-AS1 | 0.46  | 6.79  | 2.54  | 0.01407 |
| AC024293.1 | 0.36  | 9.50  | 2.54  | 0.01407 |
| PEX14      | 0.21  | 8.11  | 2.54  | 0.01408 |
| TUBGCP3    | -0.18 | 8.75  | -2.54 | 0.01410 |
| H3C9P      | -0.27 | 5.93  | -2.54 | 0.01411 |
| MEIS1      | -0.30 | 6.36  | -2.54 | 0.01413 |
| TRBD1      | 0.34  | 6.31  | 2.54  | 0.01415 |
| MSL2       | -0.20 | 9.22  | -2.54 | 0.01416 |
| PRPF19     | 0.22  | 10.68 | 2.54  | 0.01417 |
| NT5M       | 0.44  | 7.37  | 2.54  | 0.01420 |
| MTR        | -0.26 | 7.87  | -2.54 | 0.01423 |
| UBE2I      | 0.14  | 10.90 | 2.54  | 0.01424 |
| IRF2       | -0.26 | 10.50 | -2.54 | 0.01425 |
| BX679664.1 | 0.20  | 5.17  | 2.54  | 0.01426 |

|            |       |       |       |         |
|------------|-------|-------|-------|---------|
| MRPL54     | 0.32  | 8.85  | 2.54  | 0.01427 |
| PAXX       | 0.26  | 9.32  | 2.53  | 0.01431 |
| MCAT       | 0.26  | 7.08  | 2.53  | 0.01433 |
| NDUFB7     | 0.27  | 9.40  | 2.53  | 0.01434 |
| RPL35A     | 0.26  | 13.75 | 2.53  | 0.01435 |
| SLC6A6     | -0.38 | 11.68 | -2.53 | 0.01435 |
| SPRED1     | -0.29 | 5.46  | -2.53 | 0.01437 |
| UCK1       | 0.16  | 8.83  | 2.53  | 0.01439 |
| RCC1L      | 0.22  | 9.31  | 2.53  | 0.01440 |
| PIAS4      | 0.16  | 8.65  | 2.53  | 0.01441 |
| IQGAP1     | -0.31 | 11.70 | -2.53 | 0.01443 |
| REXO4      | 0.18  | 9.08  | 2.53  | 0.01444 |
| SOS2       | -0.36 | 8.67  | -2.53 | 0.01446 |
| AC004386.1 | 0.36  | 6.62  | 2.53  | 0.01446 |
| ZBTB1      | -0.28 | 7.93  | -2.53 | 0.01448 |
| NHSL2      | -0.23 | 10.50 | -2.53 | 0.01453 |
| MAP3K14    | 0.16  | 10.19 | 2.53  | 0.01454 |
| RPS27A     | 0.26  | 13.12 | 2.53  | 0.01456 |
| SOCS2      | -0.20 | 6.64  | -2.53 | 0.01457 |
| KATNBL1    | -0.29 | 7.72  | -2.53 | 0.01457 |
| AP3S1      | -0.23 | 7.81  | -2.53 | 0.01458 |
| RAB11FIP1  | -0.30 | 11.46 | -2.53 | 0.01463 |
| DNAH10OS   | -0.22 | 5.53  | -2.53 | 0.01465 |
| TPP2       | -0.20 | 8.09  | -2.53 | 0.01466 |
| PHF3       | -0.18 | 9.13  | -2.53 | 0.01467 |
| PLEKHM3    | -0.28 | 7.17  | -2.53 | 0.01467 |
| PCYT1A     | -0.16 | 9.86  | -2.52 | 0.01470 |
| SAP30L     | -0.19 | 9.04  | -2.52 | 0.01474 |
| AC008026.2 | 0.40  | 9.03  | 2.52  | 0.01475 |
| ZNF333     | -0.31 | 7.94  | -2.52 | 0.01475 |
| ATP9A      | -0.42 | 6.54  | -2.52 | 0.01476 |
| RPL21P120  | 0.22  | 5.58  | 2.52  | 0.01476 |
| RPS20      | 0.28  | 13.63 | 2.52  | 0.01476 |
| LRRCC1     | 0.25  | 6.00  | 2.52  | 0.01477 |
| CMTM6      | -0.29 | 10.92 | -2.52 | 0.01479 |
| RPL21P11   | 0.22  | 6.22  | 2.52  | 0.01483 |
| RPL12P47   | 0.31  | 5.43  | 2.52  | 0.01484 |
| ZNF576     | 0.23  | 6.99  | 2.52  | 0.01485 |
| AGTPBP1    | -0.27 | 9.32  | -2.52 | 0.01486 |
| AC006978.1 | 0.19  | 7.49  | 2.52  | 0.01491 |
| SCAND1     | 0.31  | 8.85  | 2.52  | 0.01492 |
| NABP2      | 0.25  | 8.53  | 2.52  | 0.01498 |
| CORO7      | 0.23  | 9.76  | 2.52  | 0.01502 |
| PABPC4     | 0.17  | 10.82 | 2.52  | 0.01502 |
| AC008280.3 | 0.23  | 5.01  | 2.52  | 0.01504 |
| SGTA       | 0.19  | 9.88  | 2.52  | 0.01505 |
| SSX2IP     | -0.22 | 6.38  | -2.52 | 0.01505 |
| TAB2       | -0.27 | 9.72  | -2.51 | 0.01505 |
| TRMT2A     | 0.20  | 9.31  | 2.51  | 0.01505 |
| OPA1       | -0.19 | 7.91  | -2.51 | 0.01506 |



|            |       |       |       |         |
|------------|-------|-------|-------|---------|
| RFNG       | 0.21  | 9.06  | 2.51  | 0.01507 |
| SCARB2     | -0.25 | 8.47  | -2.51 | 0.01511 |
| IRF3       | 0.20  | 10.69 | 2.51  | 0.01512 |
| Z82206.1   | 0.30  | 6.85  | 2.51  | 0.01518 |
| AC011979.1 | 0.23  | 6.20  | 2.51  | 0.01518 |
| GOPC       | -0.22 | 7.32  | -2.51 | 0.01521 |
| BTN2A3P    | -0.30 | 5.50  | -2.51 | 0.01525 |
| HERC2P9    | -0.31 | 6.41  | -2.51 | 0.01526 |
| ZMYM2      | -0.23 | 8.19  | -2.51 | 0.01529 |
| PFKL       | 0.21  | 11.54 | 2.51  | 0.01529 |
| UFL1       | -0.29 | 6.94  | -2.51 | 0.01529 |
| XPOT       | -0.22 | 8.09  | -2.51 | 0.01530 |
| CCDC186    | -0.25 | 7.34  | -2.51 | 0.01533 |
| EIF3B      | 0.19  | 11.46 | 2.51  | 0.01536 |
| MRT04      | 0.21  | 8.34  | 2.51  | 0.01537 |
| RNFT1      | -0.25 | 6.22  | -2.51 | 0.01539 |
| EDEM1      | -0.17 | 9.75  | -2.51 | 0.01540 |
| DAPK1      | -0.32 | 9.04  | -2.51 | 0.01541 |
| EIF3D      | 0.18  | 11.90 | 2.50  | 0.01544 |
| PRKRIP1    | 0.16  | 9.13  | 2.50  | 0.01544 |
| TMED9      | 0.24  | 11.24 | 2.50  | 0.01547 |
| RYBP       | -0.29 | 9.00  | -2.50 | 0.01552 |
| TAFA2      | -0.40 | 5.79  | -2.50 | 0.01552 |
| CRYBG3     | -0.25 | 6.06  | -2.50 | 0.01556 |
| MYSM1      | -0.33 | 6.99  | -2.50 | 0.01558 |
| FCHSD2     | -0.19 | 9.38  | -2.50 | 0.01561 |
| RNF13      | -0.30 | 9.33  | -2.50 | 0.01563 |
| C21orf91   | -0.24 | 7.35  | -2.50 | 0.01565 |
| RPS23P8    | 0.32  | 10.15 | 2.50  | 0.01566 |
| PPP2R1B    | -0.21 | 7.35  | -2.50 | 0.01567 |
| CCDC142    | 0.28  | 8.05  | 2.50  | 0.01569 |
| C2CD5      | -0.30 | 7.76  | -2.50 | 0.01570 |
| KIAA0232   | -0.25 | 9.52  | -2.50 | 0.01573 |
| STARD4     | -0.28 | 5.77  | -2.50 | 0.01575 |
| SPSB3      | 0.23  | 10.53 | 2.50  | 0.01577 |
| RB1CC1     | -0.30 | 8.38  | -2.50 | 0.01579 |
| AL109628.1 | 0.42  | 7.34  | 2.50  | 0.01580 |
| AP4E1      | -0.26 | 6.63  | -2.50 | 0.01581 |
| PELI2      | -0.28 | 7.96  | -2.50 | 0.01582 |
| MCTP1      | -0.28 | 7.35  | -2.49 | 0.01583 |
| CDK12      | -0.20 | 9.23  | -2.49 | 0.01584 |
| ST6GALNAC4 | 0.43  | 9.58  | 2.49  | 0.01585 |
| SMG1P2     | -0.26 | 5.38  | -2.49 | 0.01585 |
| BEX3       | 0.30  | 8.12  | 2.49  | 0.01586 |
| COPE       | 0.24  | 11.01 | 2.49  | 0.01587 |
| SWSAP1     | 0.27  | 7.24  | 2.49  | 0.01590 |
| NUCKS1P1   | 0.25  | 5.75  | 2.49  | 0.01590 |
| PI4K2B     | -0.29 | 6.38  | -2.49 | 0.01592 |
| MTMR6      | -0.28 | 7.79  | -2.49 | 0.01593 |
| GP9        | 0.47  | 7.50  | 2.49  | 0.01594 |

|            |       |       |       |         |
|------------|-------|-------|-------|---------|
| LTB4R2     | -0.31 | 5.09  | -2.49 | 0.01595 |
| NDUFA10    | 0.15  | 10.02 | 2.49  | 0.01596 |
| PDAP1      | 0.19  | 10.53 | 2.49  | 0.01598 |
| STK38L     | -0.26 | 7.63  | -2.49 | 0.01599 |
| TCF20      | -0.19 | 9.47  | -2.49 | 0.01602 |
| RNF146     | -0.26 | 8.08  | -2.49 | 0.01602 |
| AL031985.3 | 0.20  | 5.16  | 2.49  | 0.01604 |
| RWDD1      | 0.22  | 8.66  | 2.49  | 0.01608 |
| NIPBL-DT   | -0.24 | 6.19  | -2.49 | 0.01609 |
| URM1       | 0.19  | 9.78  | 2.49  | 0.01610 |
| RPS19P7    | 0.36  | 6.41  | 2.49  | 0.01611 |
| PCSK7      | 0.20  | 11.04 | 2.49  | 0.01613 |
| AL592114.1 | 0.22  | 5.81  | 2.49  | 0.01614 |
| COP1       | -0.23 | 9.27  | -2.49 | 0.01619 |
| ZBTB32     | 0.35  | 6.04  | 2.49  | 0.01621 |
| DNPH1      | 0.32  | 7.60  | 2.48  | 0.01625 |
| MED13L     | -0.39 | 9.46  | -2.48 | 0.01628 |
| GPI        | 0.20  | 11.34 | 2.48  | 0.01632 |
| ASPSR1     | 0.22  | 8.68  | 2.48  | 0.01635 |
| IFI16      | -0.36 | 11.11 | -2.48 | 0.01635 |
| CEMIP2     | -0.28 | 9.29  | -2.48 | 0.01637 |
| CALCO2     | -0.16 | 10.22 | -2.48 | 0.01639 |
| ADAR       | -0.29 | 13.07 | -2.48 | 0.01640 |
| PLEKHJ1    | 0.19  | 8.93  | 2.48  | 0.01643 |
| AC074032.1 | 0.29  | 5.46  | 2.48  | 0.01646 |
| RING1      | 0.18  | 9.61  | 2.48  | 0.01650 |
| CLEC4D     | -0.49 | 7.11  | -2.48 | 0.01651 |
| DYNC1LI1   | -0.18 | 9.02  | -2.48 | 0.01652 |
| TRAPPC8    | -0.30 | 8.13  | -2.48 | 0.01652 |
| WNT1       | 0.32  | 5.93  | 2.48  | 0.01656 |
| GPCPD1     | -0.24 | 10.26 | -2.48 | 0.01656 |
| ZNF106     | -0.23 | 9.96  | -2.48 | 0.01657 |
| RPL11      | 0.26  | 14.35 | 2.48  | 0.01658 |
| MBP        | -0.23 | 11.53 | -2.48 | 0.01660 |
| SDE2       | -0.25 | 7.09  | -2.48 | 0.01661 |
| AC024940.3 | 0.29  | 7.51  | 2.48  | 0.01662 |
| TECPR1     | 0.15  | 10.49 | 2.48  | 0.01662 |
| PEMT       | 0.23  | 7.41  | 2.47  | 0.01666 |
| LINC00869  | 0.20  | 7.67  | 2.47  | 0.01669 |
| AP5M1      | -0.17 | 7.91  | -2.47 | 0.01671 |
| CCS        | 0.21  | 9.60  | 2.47  | 0.01671 |
| SLC39A6    | -0.21 | 7.60  | -2.47 | 0.01672 |
| PTPN12     | -0.34 | 9.36  | -2.47 | 0.01674 |
| NFE2L2     | -0.26 | 9.20  | -2.47 | 0.01677 |
| SIRPG      | 0.31  | 9.22  | 2.47  | 0.01677 |
| KPNA1      | -0.21 | 8.99  | -2.47 | 0.01681 |
| MAP2K2     | 0.20  | 11.32 | 2.47  | 0.01682 |
| ENPP5      | -0.27 | 5.42  | -2.47 | 0.01682 |
| MIR22HG    | -0.31 | 6.69  | -2.47 | 0.01685 |
| TXNRD2     | 0.20  | 8.86  | 2.47  | 0.01686 |

|            |       |       |       |         |
|------------|-------|-------|-------|---------|
| AL138799.3 | 0.32  | 5.19  | 2.47  | 0.01691 |
| TRAP1      | 0.19  | 9.57  | 2.47  | 0.01691 |
| EFR3A      | -0.18 | 8.30  | -2.47 | 0.01692 |
| RHOH       | 0.22  | 10.06 | 2.47  | 0.01694 |
| TAP2       | -0.26 | 9.42  | -2.47 | 0.01702 |
| AC068446.1 | -0.34 | 5.25  | -2.47 | 0.01704 |
| FAM13A-AS1 | -0.36 | 8.84  | -2.47 | 0.01704 |
| SSR4       | 0.28  | 11.41 | 2.47  | 0.01705 |
| DISC1      | -0.30 | 7.11  | -2.46 | 0.01710 |
| HNRNPA2B1  | -0.18 | 11.65 | -2.46 | 0.01711 |
| AL157392.3 | -0.37 | 7.16  | -2.46 | 0.01711 |
| ABTB2      | -0.36 | 6.09  | -2.46 | 0.01712 |
| AC087633.2 | 0.38  | 8.77  | 2.46  | 0.01713 |
| SSNA1      | 0.23  | 9.99  | 2.46  | 0.01714 |
| JAK2       | -0.37 | 7.77  | -2.46 | 0.01718 |
| NELFB      | 0.19  | 10.27 | 2.46  | 0.01719 |
| RNF168     | -0.18 | 8.03  | -2.46 | 0.01721 |
| TRBJ2-2P   | 0.29  | 4.97  | 2.46  | 0.01723 |
| CPNE8      | -0.26 | 5.82  | -2.46 | 0.01726 |
| LINC01410  | -0.37 | 7.10  | -2.46 | 0.01726 |
| C6orf62    | -0.18 | 10.78 | -2.46 | 0.01727 |
| NR1H2      | 0.19  | 10.59 | 2.46  | 0.01729 |
| PLEKHM2    | 0.14  | 10.76 | 2.46  | 0.01729 |
| MLLT10     | -0.19 | 7.93  | -2.46 | 0.01733 |
| AC087650.1 | 0.27  | 5.57  | 2.46  | 0.01733 |
| GAPVD1     | -0.22 | 8.63  | -2.46 | 0.01736 |
| TMEM101    | 0.19  | 8.68  | 2.46  | 0.01738 |
| KLF2       | 0.19  | 12.92 | 2.46  | 0.01738 |
| DCLRE1A    | -0.24 | 6.08  | -2.46 | 0.01741 |
| CDIP1      | 0.18  | 9.62  | 2.46  | 0.01742 |
| TMIGD2     | 0.34  | 7.90  | 2.46  | 0.01747 |
| RNF111     | -0.28 | 7.97  | -2.46 | 0.01748 |
| EPN1       | 0.26  | 10.54 | 2.45  | 0.01750 |
| UBR4       | -0.17 | 11.27 | -2.45 | 0.01750 |
| RPL26P37   | 0.23  | 5.20  | 2.45  | 0.01752 |
| DUS3L      | 0.21  | 8.47  | 2.45  | 0.01753 |
| ERAP1      | -0.33 | 9.23  | -2.45 | 0.01757 |
| AC114728.1 | 0.32  | 7.39  | 2.45  | 0.01757 |
| NDUFA2     | 0.24  | 9.72  | 2.45  | 0.01758 |
| RSRC2      | -0.16 | 9.15  | -2.45 | 0.01759 |
| DYM        | 0.15  | 8.99  | 2.45  | 0.01759 |
| ACTR1B     | 0.13  | 10.19 | 2.45  | 0.01761 |
| AP002360.2 | 0.24  | 5.79  | 2.45  | 0.01764 |
| PRNP       | -0.19 | 9.19  | -2.45 | 0.01765 |
| GNS        | -0.23 | 10.74 | -2.45 | 0.01766 |
| MMP24OS    | 0.26  | 10.00 | 2.45  | 0.01767 |
| POC5       | -0.18 | 6.97  | -2.45 | 0.01767 |
| MTLN       | 0.25  | 7.56  | 2.45  | 0.01767 |
| AC243960.2 | -0.31 | 6.49  | -2.45 | 0.01771 |
| DNAJC25    | -0.24 | 5.41  | -2.45 | 0.01772 |

|            |       |       |       |         |
|------------|-------|-------|-------|---------|
| ZNF574     | 0.15  | 9.12  | 2.45  | 0.01773 |
| MT-ND5     | -0.22 | 13.40 | -2.45 | 0.01775 |
| SVIL       | -0.33 | 10.09 | -2.45 | 0.01779 |
| ITPR2      | -0.21 | 7.83  | -2.45 | 0.01782 |
| CYB5R3     | 0.21  | 10.72 | 2.45  | 0.01782 |
| HMGCR      | -0.24 | 8.61  | -2.45 | 0.01786 |
| MLST8      | 0.21  | 8.76  | 2.45  | 0.01787 |
| PRKCQ-AS1  | 0.27  | 8.52  | 2.45  | 0.01787 |
| EEF1DP1    | 0.34  | 8.89  | 2.45  | 0.01789 |
| ZNF627     | -0.22 | 6.46  | -2.45 | 0.01789 |
| NOC4L      | 0.24  | 8.50  | 2.44  | 0.01793 |
| TMC6       | 0.19  | 11.66 | 2.44  | 0.01797 |
| C1orf35    | 0.23  | 8.10  | 2.44  | 0.01797 |
| ACAP2      | -0.25 | 9.53  | -2.44 | 0.01798 |
| YWHAG      | -0.21 | 9.38  | -2.44 | 0.01802 |
| LSR        | 0.28  | 8.22  | 2.44  | 0.01805 |
| FLYWCH2    | 0.22  | 7.67  | 2.44  | 0.01806 |
| AC025171.1 | 0.19  | 6.81  | 2.44  | 0.01806 |
| AP000769.1 | 0.33  | 6.22  | 2.44  | 0.01811 |
| BRF1       | 0.20  | 9.00  | 2.44  | 0.01812 |
| CD302      | -0.23 | 8.85  | -2.44 | 0.01813 |
| STIM2      | -0.15 | 8.41  | -2.44 | 0.01813 |
| DDX49      | 0.21  | 9.27  | 2.44  | 0.01814 |
| GTF2E1     | -0.18 | 7.05  | -2.44 | 0.01815 |
| CHM        | -0.25 | 6.21  | -2.44 | 0.01815 |
| VNN1       | -0.48 | 7.50  | -2.44 | 0.01815 |
| SIL1       | 0.26  | 8.20  | 2.44  | 0.01817 |
| TIMM13     | 0.26  | 9.10  | 2.44  | 0.01818 |
| TMEM80     | 0.23  | 7.92  | 2.44  | 0.01822 |
| PLSCR1     | -0.51 | 8.77  | -2.44 | 0.01822 |
| ADRM1      | 0.21  | 10.35 | 2.44  | 0.01823 |
| GPX4       | 0.26  | 11.68 | 2.44  | 0.01824 |
| NR3C1      | -0.23 | 9.09  | -2.44 | 0.01824 |
| C11orf68   | 0.20  | 10.09 | 2.44  | 0.01825 |
| SEPTIN6    | 0.18  | 11.73 | 2.44  | 0.01827 |
| GPAA1      | 0.19  | 10.07 | 2.44  | 0.01827 |
| PLEKHB1    | 0.31  | 8.65  | 2.44  | 0.01828 |
| WDFY3      | -0.46 | 8.92  | -2.44 | 0.01829 |
| SH3BGRL3   | 0.26  | 13.90 | 2.44  | 0.01829 |
| TWF1       | -0.25 | 6.26  | -2.44 | 0.01831 |
| CDCA4      | 0.19  | 7.25  | 2.44  | 0.01833 |
| TMEM39A    | -0.17 | 7.31  | -2.44 | 0.01837 |
| DSE        | -0.22 | 7.73  | -2.43 | 0.01842 |
| PIGA       | -0.23 | 5.85  | -2.43 | 0.01845 |
| MRPL2      | 0.26  | 5.95  | 2.43  | 0.01845 |
| TUG1       | -0.15 | 9.98  | -2.43 | 0.01845 |
| GFER       | 0.21  | 8.10  | 2.43  | 0.01846 |
| NDUFA11    | 0.25  | 8.12  | 2.43  | 0.01847 |
| NPEPPS     | -0.22 | 9.69  | -2.43 | 0.01847 |
| PREP       | -0.13 | 8.96  | -2.43 | 0.01853 |

|          |       |       |       |         |
|----------|-------|-------|-------|---------|
| MRPL41   | 0.28  | 8.65  | 2.43  | 0.01853 |
| MAP1S    | 0.23  | 9.68  | 2.43  | 0.01856 |
| MEGF9    | -0.39 | 10.63 | -2.43 | 0.01857 |
| C17orf58 | -0.22 | 5.26  | -2.43 | 0.01857 |
| SEC63    | -0.18 | 8.24  | -2.43 | 0.01858 |
| MMUT     | -0.23 | 6.99  | -2.43 | 0.01858 |
| COPB2    | -0.16 | 9.74  | -2.43 | 0.01860 |
| WDR5B    | -0.20 | 6.57  | -2.43 | 0.01863 |
| MIF      | 0.34  | 6.95  | 2.43  | 0.01865 |
| PACS1    | 0.15  | 12.54 | 2.43  | 0.01866 |
| SERF2    | 0.33  | 13.58 | 2.43  | 0.01866 |
| LDLR     | -0.29 | 7.83  | -2.43 | 0.01868 |
| ST8SIA4  | -0.28 | 8.92  | -2.43 | 0.01869 |
| CRLF3    | -0.24 | 9.15  | -2.43 | 0.01870 |
| FAR1     | -0.23 | 8.56  | -2.43 | 0.01875 |
| SRSF8    | 0.17  | 9.51  | 2.43  | 0.01879 |
| NAALADL1 | 0.25  | 7.77  | 2.42  | 0.01884 |
| NDUFB8P2 | 0.21  | 5.30  | 2.42  | 0.01884 |
| ZBTB37   | -0.29 | 7.71  | -2.42 | 0.01886 |
| TCF7     | 0.33  | 12.58 | 2.42  | 0.01888 |
| DCBLD1   | -0.23 | 5.82  | -2.42 | 0.01888 |
| CMPK2    | -0.66 | 6.75  | -2.42 | 0.01889 |
| KCTD9    | -0.26 | 5.96  | -2.42 | 0.01891 |
| CASP6    | 0.20  | 7.17  | 2.42  | 0.01896 |
| STX8     | 0.21  | 8.61  | 2.42  | 0.01896 |
| LIMS2    | 0.39  | 6.95  | 2.42  | 0.01906 |
| NFXL1    | -0.38 | 6.52  | -2.42 | 0.01906 |
| ZBTB33   | -0.18 | 7.52  | -2.42 | 0.01907 |
| FHIT     | 0.46  | 7.95  | 2.42  | 0.01909 |
| PGBD1    | -0.26 | 5.02  | -2.42 | 0.01910 |
| NAA60    | 0.15  | 9.99  | 2.42  | 0.01911 |
| UBALD1   | 0.27  | 9.09  | 2.42  | 0.01913 |
| NACC2    | -0.18 | 9.69  | -2.42 | 0.01916 |
| MCM5     | 0.18  | 10.47 | 2.42  | 0.01918 |
| IFIH1    | -0.39 | 8.42  | -2.42 | 0.01918 |
| PRKAG2   | -0.17 | 8.69  | -2.42 | 0.01922 |
| SLC40A1  | -0.35 | 9.19  | -2.42 | 0.01922 |
| PAPSS1   | -0.27 | 8.55  | -2.42 | 0.01922 |
| MCRS1    | 0.17  | 10.32 | 2.42  | 0.01923 |
| YIF1A    | 0.22  | 8.26  | 2.42  | 0.01924 |
| TGFBR2   | -0.23 | 10.90 | -2.42 | 0.01927 |
| SNX18    | -0.28 | 8.73  | -2.42 | 0.01927 |
| TMF1     | -0.21 | 8.10  | -2.42 | 0.01927 |
| BOP1     | 0.23  | 8.95  | 2.42  | 0.01928 |
| DEXI     | 0.21  | 8.72  | 2.42  | 0.01928 |
| PPP2R1A  | 0.20  | 11.87 | 2.42  | 0.01929 |
| CNEP1R1  | -0.29 | 7.28  | -2.41 | 0.01933 |
| DDX39A   | 0.18  | 10.26 | 2.41  | 0.01934 |
| TSSC4    | 0.22  | 8.88  | 2.41  | 0.01938 |
| SSR2     | 0.21  | 11.96 | 2.41  | 0.01938 |

|            |       |       |       |         |
|------------|-------|-------|-------|---------|
| PES1       | 0.22  | 9.72  | 2.41  | 0.01940 |
| DST        | -0.23 | 6.35  | -2.41 | 0.01942 |
| NECAP1     | -0.18 | 7.89  | -2.41 | 0.01943 |
| FOXJ3      | -0.19 | 8.64  | -2.41 | 0.01944 |
| AARS1      | 0.20  | 9.74  | 2.41  | 0.01947 |
| PROSER1    | -0.16 | 8.81  | -2.41 | 0.01947 |
| PLP2       | 0.36  | 11.93 | 2.41  | 0.01950 |
| RUNDC1     | 0.20  | 8.67  | 2.41  | 0.01950 |
| MAML3      | -0.33 | 8.02  | -2.41 | 0.01950 |
| POU2F2     | 0.38  | 11.86 | 2.41  | 0.01951 |
| IPO7       | -0.22 | 8.38  | -2.41 | 0.01952 |
| LNPEP      | -0.19 | 9.47  | -2.41 | 0.01955 |
| AC025164.2 | 0.22  | 5.35  | 2.41  | 0.01960 |
| RNASEL     | -0.25 | 8.84  | -2.41 | 0.01961 |
| LBR        | -0.33 | 9.87  | -2.41 | 0.01961 |
| GGCX       | -0.17 | 7.82  | -2.41 | 0.01965 |
| KIAA0753   | -0.19 | 7.25  | -2.41 | 0.01965 |
| AP1S3      | 0.29  | 5.59  | 2.41  | 0.01965 |
| SLC39A10   | -0.25 | 6.56  | -2.41 | 0.01965 |
| UBQLN1     | -0.19 | 9.38  | -2.41 | 0.01966 |
| EPG5       | -0.24 | 8.76  | -2.41 | 0.01968 |
| AC074085.2 | 0.30  | 6.88  | 2.41  | 0.01968 |
| BROX       | -0.21 | 8.54  | -2.41 | 0.01969 |
| LRCH1      | -0.19 | 7.21  | -2.41 | 0.01969 |
| ABI1       | -0.22 | 9.30  | -2.41 | 0.01971 |
| RCBTB1     | -0.26 | 7.03  | -2.41 | 0.01975 |
| MEF2C-AS1  | -0.27 | 5.09  | -2.41 | 0.01976 |
| ZNF28      | -0.16 | 6.41  | -2.41 | 0.01977 |
| KLHL2      | -0.45 | 8.11  | -2.41 | 0.01977 |
| SLC36A1    | -0.33 | 8.30  | -2.40 | 0.01981 |
| WDR7       | -0.18 | 7.76  | -2.40 | 0.01983 |
| AC007969.1 | 0.37  | 10.15 | 2.40  | 0.01987 |
| USP38      | -0.28 | 7.73  | -2.40 | 0.01988 |
| IRF2BP1    | 0.18  | 8.54  | 2.40  | 0.01989 |
| JMJD8      | 0.23  | 9.45  | 2.40  | 0.01992 |
| ASCC3      | -0.31 | 7.08  | -2.40 | 0.01996 |
| PELP1      | 0.22  | 9.67  | 2.40  | 0.01996 |
| L3HYPDH    | -0.25 | 5.66  | -2.40 | 0.01999 |
| GPR137     | 0.20  | 8.41  | 2.40  | 0.01999 |
| HIF1A      | -0.35 | 8.77  | -2.40 | 0.01999 |
| AKT1S1     | 0.28  | 8.90  | 2.40  | 0.02001 |
| UQCC3      | 0.25  | 7.02  | 2.40  | 0.02005 |
| AATF       | 0.18  | 10.32 | 2.40  | 0.02012 |
| TAB3       | -0.26 | 7.28  | -2.40 | 0.02013 |
| KCNE3      | -0.28 | 9.87  | -2.40 | 0.02013 |
| SEC24B     | -0.20 | 8.06  | -2.40 | 0.02013 |
| CEACAM1    | -0.57 | 8.26  | -2.40 | 0.02014 |
| GORAB      | -0.24 | 5.91  | -2.40 | 0.02025 |
| SNAPC2     | 0.27  | 8.38  | 2.40  | 0.02026 |
| FP565260.3 | 0.31  | 5.37  | 2.40  | 0.02026 |

|            |       |       |       |         |
|------------|-------|-------|-------|---------|
| TCF3       | 0.20  | 9.76  | 2.39  | 0.02030 |
| TBC1D22A   | 0.17  | 10.11 | 2.39  | 0.02031 |
| DNAJC3     | -0.26 | 9.27  | -2.39 | 0.02036 |
| CHSY1      | -0.40 | 8.56  | -2.39 | 0.02038 |
| HSD17B8    | 0.25  | 7.36  | 2.39  | 0.02041 |
| ALG13      | -0.23 | 7.78  | -2.39 | 0.02044 |
| TPR        | -0.20 | 10.35 | -2.39 | 0.02045 |
| APOBEC3C   | 0.27  | 11.23 | 2.39  | 0.02046 |
| TECR       | 0.23  | 10.80 | 2.39  | 0.02046 |
| RIF1       | -0.21 | 7.66  | -2.39 | 0.02048 |
| CKAP2      | -0.22 | 6.44  | -2.39 | 0.02049 |
| ATP5PO     | 0.24  | 8.55  | 2.39  | 0.02051 |
| M1AP       | 0.27  | 4.99  | 2.39  | 0.02053 |
| ODF2L      | -0.22 | 7.05  | -2.39 | 0.02053 |
| NUCKS1     | 0.22  | 10.40 | 2.39  | 0.02055 |
| FAM86C1    | 0.26  | 6.52  | 2.39  | 0.02056 |
| PCMTD1     | -0.23 | 8.47  | -2.39 | 0.02056 |
| NFIC       | 0.26  | 9.77  | 2.39  | 0.02056 |
| CASP8      | -0.24 | 10.35 | -2.39 | 0.02057 |
| FCGR3B     | -0.48 | 14.16 | -2.39 | 0.02059 |
| IDH3G      | 0.20  | 10.77 | 2.39  | 0.02061 |
| PSMD5      | -0.15 | 7.79  | -2.39 | 0.02061 |
| OAS3       | -0.69 | 9.24  | -2.39 | 0.02061 |
| MFAP3      | -0.31 | 5.72  | -2.39 | 0.02063 |
| HDAC11     | 0.24  | 7.29  | 2.39  | 0.02063 |
| HEATR5B    | -0.22 | 8.46  | -2.39 | 0.02065 |
| ANKS1A     | -0.26 | 8.49  | -2.39 | 0.02066 |
| NSD1       | -0.13 | 10.27 | -2.39 | 0.02069 |
| SNRPD2     | 0.27  | 10.94 | 2.39  | 0.02069 |
| CHCHD10    | 0.31  | 8.42  | 2.38  | 0.02079 |
| CENPN      | -0.26 | 5.34  | -2.38 | 0.02083 |
| HSF1       | 0.15  | 10.42 | 2.38  | 0.02084 |
| ZNFX1      | -0.22 | 11.43 | -2.38 | 0.02090 |
| GATA3      | 0.21  | 9.36  | 2.38  | 0.02092 |
| PPIH       | 0.20  | 7.98  | 2.38  | 0.02094 |
| CERS4      | 0.24  | 8.45  | 2.38  | 0.02095 |
| ELOVL5     | -0.27 | 9.98  | -2.38 | 0.02097 |
| RMI1       | -0.23 | 6.43  | -2.38 | 0.02097 |
| LYRM9      | 0.19  | 7.25  | 2.38  | 0.02099 |
| NUS1       | -0.24 | 6.97  | -2.38 | 0.02099 |
| BAG3       | 0.26  | 8.05  | 2.38  | 0.02102 |
| AP000281.2 | 0.27  | 6.85  | 2.38  | 0.02103 |
| NR2C2AP    | 0.19  | 8.25  | 2.38  | 0.02104 |
| AAK1       | 0.22  | 10.41 | 2.38  | 0.02107 |
| CDK4       | 0.19  | 9.13  | 2.38  | 0.02109 |
| RANBP6     | -0.24 | 6.84  | -2.38 | 0.02109 |
| ELF4       | -0.19 | 11.25 | -2.38 | 0.02110 |
| SACM1L     | -0.18 | 8.39  | -2.38 | 0.02113 |
| PHGDH      | 0.37  | 6.52  | 2.38  | 0.02114 |
| CTNS       | 0.15  | 8.15  | 2.38  | 0.02114 |

|            |       |       |       |         |
|------------|-------|-------|-------|---------|
| ATF3       | -0.31 | 5.61  | -2.38 | 0.02115 |
| SELENON    | 0.21  | 9.43  | 2.38  | 0.02115 |
| KIAA1958   | -0.29 | 5.82  | -2.38 | 0.02117 |
| ZC3H14     | -0.15 | 7.89  | -2.38 | 0.02117 |
| NFKBIZ     | -0.34 | 8.57  | -2.38 | 0.02117 |
| RNLS       | -0.19 | 5.32  | -2.38 | 0.02118 |
| CNOT10     | 0.13  | 8.59  | 2.38  | 0.02119 |
| NUP58      | -0.30 | 7.80  | -2.38 | 0.02121 |
| TMEM170B   | -0.22 | 8.01  | -2.38 | 0.02128 |
| NEK7       | -0.34 | 8.00  | -2.37 | 0.02130 |
| AGFG1      | -0.29 | 9.16  | -2.37 | 0.02133 |
| FGD6       | -0.21 | 6.14  | -2.37 | 0.02135 |
| ZNF468     | -0.22 | 6.69  | -2.37 | 0.02135 |
| SLC16A6    | -0.23 | 7.48  | -2.37 | 0.02143 |
| ACOT7      | 0.20  | 7.38  | 2.37  | 0.02143 |
| CPEB3      | -0.28 | 5.65  | -2.37 | 0.02145 |
| KLC4       | 0.13  | 8.72  | 2.37  | 0.02146 |
| C15orf62   | 0.22  | 5.38  | 2.37  | 0.02153 |
| STX17      | -0.18 | 7.62  | -2.37 | 0.02157 |
| ABHD2      | -0.27 | 11.44 | -2.37 | 0.02160 |
| C3orf38    | -0.20 | 7.23  | -2.37 | 0.02161 |
| MXD4       | 0.18  | 10.82 | 2.37  | 0.02164 |
| WDR26      | -0.24 | 10.22 | -2.37 | 0.02173 |
| LPAL2      | -0.32 | 5.73  | -2.37 | 0.02175 |
| LINC01137  | 0.23  | 6.80  | 2.37  | 0.02181 |
| ACVR1B     | -0.27 | 8.42  | -2.36 | 0.02182 |
| ANKRD44    | -0.25 | 9.92  | -2.36 | 0.02186 |
| MAP4K1     | 0.21  | 11.03 | 2.36  | 0.02189 |
| GTF3C3     | -0.17 | 7.36  | -2.36 | 0.02189 |
| ARRDC3     | -0.35 | 9.29  | -2.36 | 0.02192 |
| MINDY3     | -0.19 | 6.20  | -2.36 | 0.02193 |
| PAAF1      | 0.20  | 7.52  | 2.36  | 0.02195 |
| FLI1       | -0.24 | 10.95 | -2.36 | 0.02195 |
| RPL30      | 0.22  | 14.32 | 2.36  | 0.02198 |
| PNPLA7     | 0.35  | 7.01  | 2.36  | 0.02206 |
| FNDC3B     | -0.36 | 8.18  | -2.36 | 0.02208 |
| YTHDF3     | -0.24 | 8.23  | -2.36 | 0.02209 |
| SCLT1      | -0.26 | 8.18  | -2.36 | 0.02212 |
| FBN2       | -0.37 | 6.88  | -2.36 | 0.02213 |
| MRPL33     | 0.17  | 8.05  | 2.36  | 0.02213 |
| RPS19P1    | 0.34  | 8.75  | 2.36  | 0.02214 |
| CCDC146    | -0.29 | 6.77  | -2.36 | 0.02217 |
| DGCR6L     | 0.26  | 9.15  | 2.36  | 0.02219 |
| SNX19      | -0.17 | 8.98  | -2.36 | 0.02219 |
| SIK3       | -0.16 | 10.42 | -2.36 | 0.02225 |
| AC092868.2 | 0.29  | 5.22  | 2.36  | 0.02229 |
| ZUP1       | -0.24 | 6.34  | -2.36 | 0.02229 |
| KRT18P5    | 0.31  | 4.99  | 2.36  | 0.02230 |
| DIPK2A     | -0.20 | 6.90  | -2.36 | 0.02230 |
| MSL1       | -0.35 | 10.99 | -2.36 | 0.02233 |



|            |       |       |       |         |
|------------|-------|-------|-------|---------|
| CSNK1A1    | -0.17 | 8.91  | -2.36 | 0.02234 |
| SAMD8      | -0.24 | 7.59  | -2.35 | 0.02237 |
| PGM2L1     | 0.24  | 6.96  | 2.35  | 0.02244 |
| FGD4       | -0.30 | 7.71  | -2.35 | 0.02244 |
| FCMR       | 0.25  | 11.89 | 2.35  | 0.02245 |
| IGF2R      | -0.37 | 13.02 | -2.35 | 0.02245 |
| STX11      | -0.39 | 10.09 | -2.35 | 0.02247 |
| COQ4       | 0.24  | 9.09  | 2.35  | 0.02252 |
| AL139174.1 | -0.23 | 5.08  | -2.35 | 0.02252 |
| ATAD2      | -0.31 | 6.39  | -2.35 | 0.02252 |
| FMC1       | 0.25  | 5.20  | 2.35  | 0.02255 |
| MAGED1     | 0.18  | 9.25  | 2.35  | 0.02256 |
| TNIP1      | 0.22  | 12.99 | 2.35  | 0.02256 |
| AC244502.1 | -0.25 | 5.52  | -2.35 | 0.02259 |
| NEMP1      | -0.24 | 6.84  | -2.35 | 0.02263 |
| RBL2       | -0.33 | 10.18 | -2.35 | 0.02263 |
| SPIN4      | -0.24 | 5.20  | -2.35 | 0.02265 |
| F2RL1      | -0.43 | 7.76  | -2.35 | 0.02265 |
| MAP4K3     | -0.21 | 5.45  | -2.35 | 0.02266 |
| TM9SF2     | -0.23 | 10.10 | -2.35 | 0.02272 |
| RPL21P75   | 0.28  | 8.50  | 2.35  | 0.02272 |
| TMEM203    | 0.18  | 9.33  | 2.35  | 0.02276 |
| VPS29      | -0.16 | 8.94  | -2.35 | 0.02278 |
| HNRNPH3    | -0.17 | 9.81  | -2.35 | 0.02280 |
| PPP2R5D    | 0.12  | 9.52  | 2.35  | 0.02282 |
| ATL3       | -0.17 | 8.48  | -2.35 | 0.02283 |
| KXD1       | 0.15  | 10.66 | 2.35  | 0.02283 |
| TRAM2      | -0.18 | 7.84  | -2.35 | 0.02284 |
| HDAC3      | 0.12  | 9.66  | 2.35  | 0.02285 |
| AL079342.1 | 0.34  | 5.80  | 2.35  | 0.02287 |
| C7orf50    | 0.32  | 8.83  | 2.35  | 0.02287 |
| DNAL1      | 0.21  | 6.03  | 2.35  | 0.02288 |
| LTBP3      | 0.30  | 10.42 | 2.34  | 0.02292 |
| PGP        | 0.17  | 8.35  | 2.34  | 0.02292 |
| DDX59      | -0.18 | 7.60  | -2.34 | 0.02292 |
| SEPTIN7    | -0.21 | 9.61  | -2.34 | 0.02292 |
| FKBP9      | -0.34 | 5.87  | -2.34 | 0.02294 |
| DPH5       | 0.20  | 7.94  | 2.34  | 0.02296 |
| AMOTL1     | -0.24 | 5.37  | -2.34 | 0.02297 |
| EIF4E3     | -0.26 | 9.17  | -2.34 | 0.02298 |
| SUMF2      | 0.15  | 10.16 | 2.34  | 0.02303 |
| HDGFL2     | 0.18  | 9.44  | 2.34  | 0.02304 |
| ALG3       | 0.21  | 9.04  | 2.34  | 0.02305 |
| FASTK      | 0.20  | 9.70  | 2.34  | 0.02308 |
| CNTRL      | -0.19 | 9.39  | -2.34 | 0.02314 |
| AC002091.1 | -0.28 | 6.04  | -2.34 | 0.02315 |
| SPNS3      | 0.35  | 7.86  | 2.34  | 0.02316 |
| RHBDD2     | 0.20  | 10.19 | 2.34  | 0.02320 |
| TMEM256    | 0.21  | 6.62  | 2.34  | 0.02320 |
| MDGA1      | 0.93  | 6.77  | 2.34  | 0.02322 |

|            |       |       |       |         |
|------------|-------|-------|-------|---------|
| NOD2       | -0.34 | 9.18  | -2.34 | 0.02324 |
| NUP88      | 0.16  | 8.58  | 2.34  | 0.02326 |
| RAB8B      | -0.21 | 8.60  | -2.34 | 0.02326 |
| PIH1D1     | 0.20  | 9.75  | 2.34  | 0.02327 |
| MTM1       | -0.25 | 7.32  | -2.34 | 0.02331 |
| FAM50A     | 0.21  | 10.15 | 2.34  | 0.02333 |
| DOCK5      | -0.35 | 10.36 | -2.34 | 0.02335 |
| VPS50      | -0.18 | 6.98  | -2.34 | 0.02335 |
| SLC11A2    | -0.18 | 7.45  | -2.34 | 0.02343 |
| GPATCH8    | -0.23 | 9.01  | -2.34 | 0.02344 |
| GALK1      | 0.27  | 8.68  | 2.34  | 0.02345 |
| LATS1      | -0.27 | 6.95  | -2.33 | 0.02348 |
| GDF11      | 0.20  | 7.88  | 2.33  | 0.02351 |
| ARFGAP1    | 0.18  | 10.43 | 2.33  | 0.02351 |
| CETP       | 0.25  | 5.53  | 2.33  | 0.02357 |
| FARSA      | 0.21  | 9.73  | 2.33  | 0.02359 |
| GPBP1L1    | -0.16 | 10.20 | -2.33 | 0.02360 |
| SLC8A1     | -0.43 | 7.51  | -2.33 | 0.02363 |
| HABP4      | 0.24  | 8.02  | 2.33  | 0.02370 |
| PAK2       | -0.19 | 10.62 | -2.33 | 0.02379 |
| CTDSP1     | 0.16  | 12.39 | 2.33  | 0.02395 |
| LINC00847  | 0.16  | 7.80  | 2.32  | 0.02404 |
| SLC38A9    | -0.16 | 6.35  | -2.32 | 0.02405 |
| LSM14A     | -0.15 | 10.08 | -2.32 | 0.02406 |
| GPX1P1     | 0.33  | 7.52  | 2.32  | 0.02411 |
| RPTOR      | 0.20  | 9.50  | 2.32  | 0.02413 |
| TMEM154    | -0.30 | 10.49 | -2.32 | 0.02414 |
| CHERP      | 0.13  | 9.73  | 2.32  | 0.02418 |
| C11orf49   | 0.19  | 7.56  | 2.32  | 0.02418 |
| CD37       | 0.21  | 14.07 | 2.32  | 0.02425 |
| FAM102B    | -0.15 | 7.49  | -2.32 | 0.02426 |
| PSEN1      | -0.19 | 10.46 | -2.32 | 0.02427 |
| ZMYND11    | -0.22 | 7.97  | -2.32 | 0.02427 |
| IVNS1ABP   | -0.25 | 10.38 | -2.32 | 0.02428 |
| TRAV23DV6  | 0.32  | 5.88  | 2.32  | 0.02430 |
| EMB        | -0.18 | 9.69  | -2.32 | 0.02432 |
| TMCC1      | -0.26 | 8.81  | -2.32 | 0.02433 |
| GPD1L      | -0.16 | 7.39  | -2.32 | 0.02434 |
| ROGDI      | 0.32  | 8.31  | 2.32  | 0.02435 |
| IL1RAP     | -0.49 | 7.20  | -2.32 | 0.02436 |
| MRPS15     | 0.19  | 9.22  | 2.32  | 0.02436 |
| AL663070.2 | 0.23  | 6.29  | 2.32  | 0.02438 |
| RPLP0      | 0.24  | 14.36 | 2.32  | 0.02443 |
| PHF14      | 0.25  | 8.37  | 2.32  | 0.02445 |
| MRPL28     | 0.22  | 9.74  | 2.32  | 0.02447 |
| PANX1      | -0.20 | 6.54  | -2.32 | 0.02453 |
| MRPL45     | 0.17  | 7.97  | 2.32  | 0.02454 |
| MPP7       | -0.25 | 7.28  | -2.32 | 0.02454 |
| WDR34      | 0.28  | 7.08  | 2.32  | 0.02455 |
| ST7        | 0.17  | 6.88  | 2.32  | 0.02455 |

|             |       |       |       |         |
|-------------|-------|-------|-------|---------|
| RASSF3      | -0.29 | 10.63 | -2.32 | 0.02457 |
| ELMO2       | -0.18 | 10.00 | -2.32 | 0.02458 |
| TBK1        | -0.25 | 7.66  | -2.32 | 0.02459 |
| ECH1        | 0.23  | 10.57 | 2.32  | 0.02460 |
| ZNF48       | 0.19  | 7.82  | 2.32  | 0.02461 |
| RASSF2      | -0.27 | 12.06 | -2.31 | 0.02462 |
| ARHGAP12    | -0.26 | 6.38  | -2.31 | 0.02464 |
| UBIAD1      | 0.21  | 8.70  | 2.31  | 0.02466 |
| MOB1A       | -0.16 | 10.61 | -2.31 | 0.02466 |
| CHMP1B      | -0.20 | 10.08 | -2.31 | 0.02467 |
| ANAPC15     | 0.22  | 9.05  | 2.31  | 0.02469 |
| MYO10       | -0.34 | 5.10  | -2.31 | 0.02474 |
| SDCBP       | -0.34 | 11.56 | -2.31 | 0.02477 |
| AC144530.1  | 0.32  | 6.94  | 2.31  | 0.02478 |
| CASP10      | -0.16 | 9.15  | -2.31 | 0.02478 |
| STK39       | -0.18 | 7.94  | -2.31 | 0.02479 |
| AC034236.1  | 0.31  | 10.11 | 2.31  | 0.02486 |
| RAD21       | -0.24 | 10.25 | -2.31 | 0.02487 |
| POU2F1      | 0.26  | 9.18  | 2.31  | 0.02490 |
| DYNLL2      | 0.16  | 10.63 | 2.31  | 0.02493 |
| PPM1G       | 0.17  | 10.72 | 2.31  | 0.02495 |
| PUM2        | -0.18 | 9.87  | -2.31 | 0.02504 |
| CDC37       | 0.17  | 11.64 | 2.31  | 0.02504 |
| ING3        | -0.17 | 7.36  | -2.31 | 0.02505 |
| STAM        | -0.21 | 7.32  | -2.31 | 0.02506 |
| WDR37       | -0.16 | 9.60  | -2.31 | 0.02512 |
| MORC3       | -0.34 | 8.21  | -2.31 | 0.02518 |
| TSPOAP1-AS1 | 0.16  | 9.30  | 2.31  | 0.02518 |
| PTPMT1      | 0.20  | 6.65  | 2.31  | 0.02519 |
| AC008957.1  | -0.37 | 5.38  | -2.31 | 0.02520 |
| ARSB        | -0.20 | 7.67  | -2.30 | 0.02523 |
| PKIG        | 0.32  | 7.54  | 2.30  | 0.02527 |
| SARNP       | 0.22  | 5.09  | 2.30  | 0.02530 |
| ACAP1       | 0.20  | 12.34 | 2.30  | 0.02530 |
| PTPN9       | -0.15 | 8.75  | -2.30 | 0.02532 |
| ATP5MF      | 0.28  | 8.91  | 2.30  | 0.02536 |
| TWF2        | 0.21  | 10.03 | 2.30  | 0.02540 |
| TAX1BP3     | 0.31  | 6.61  | 2.30  | 0.02541 |
| SRPK1       | -0.35 | 9.22  | -2.30 | 0.02547 |
| FZR1        | 0.14  | 10.14 | 2.30  | 0.02549 |
| UBA3        | -0.22 | 7.98  | -2.30 | 0.02553 |
| SHARPIN     | 0.32  | 10.52 | 2.30  | 0.02553 |
| TRMT112     | 0.20  | 10.58 | 2.30  | 0.02557 |
| ANKHD1      | 0.25  | 5.67  | 2.30  | 0.02560 |
| TNKS1BP1    | 0.19  | 7.03  | 2.30  | 0.02561 |
| RCC1        | 0.17  | 8.17  | 2.30  | 0.02568 |
| AC139272.1  | -0.53 | 5.89  | -2.30 | 0.02573 |
| FIS1        | 0.25  | 10.57 | 2.30  | 0.02575 |
| SURF6       | 0.18  | 8.65  | 2.30  | 0.02575 |
| S100A11P2   | -0.23 | 5.44  | -2.30 | 0.02576 |

|            |       |       |       |         |
|------------|-------|-------|-------|---------|
| PRKD3      | -0.24 | 7.65  | -2.30 | 0.02577 |
| HEXIM2     | 0.29  | 7.00  | 2.30  | 0.02578 |
| TPT1       | 0.19  | 15.29 | 2.30  | 0.02582 |
| AC116913.1 | 0.21  | 5.99  | 2.29  | 0.02583 |
| MGLL       | 0.32  | 8.93  | 2.29  | 0.02584 |
| PCMTD2     | -0.25 | 8.40  | -2.29 | 0.02584 |
| MRPL17     | 0.23  | 8.75  | 2.29  | 0.02588 |
| DGKG       | -0.23 | 7.08  | -2.29 | 0.02594 |
| SRP54      | -0.13 | 8.38  | -2.29 | 0.02594 |
| ZNF449     | -0.21 | 5.54  | -2.29 | 0.02595 |
| G3BP2      | -0.19 | 9.08  | -2.29 | 0.02599 |
| PARD6A     | 0.22  | 6.83  | 2.29  | 0.02599 |
| PRDM2      | -0.17 | 9.53  | -2.29 | 0.02601 |
| NT5C2      | -0.25 | 10.51 | -2.29 | 0.02606 |
| RPS7P3     | 0.25  | 5.15  | 2.29  | 0.02608 |
| IREB2      | -0.22 | 7.84  | -2.29 | 0.02608 |
| PTPRE      | -0.24 | 10.92 | -2.29 | 0.02610 |
| UNC50      | -0.13 | 8.00  | -2.29 | 0.02614 |
| POLR2B     | -0.15 | 9.65  | -2.29 | 0.02614 |
| VPS36      | -0.19 | 8.22  | -2.29 | 0.02615 |
| ARRDC5     | 0.34  | 6.89  | 2.29  | 0.02615 |
| MED18      | 0.19  | 8.27  | 2.29  | 0.02616 |
| DDHD1      | -0.23 | 7.54  | -2.29 | 0.02616 |
| POC1B      | -0.25 | 6.93  | -2.29 | 0.02617 |
| C8orf58    | 0.24  | 7.02  | 2.29  | 0.02618 |
| MT-TG      | 0.32  | 5.58  | 2.29  | 0.02619 |
| MICOS10    | 0.15  | 6.91  | 2.29  | 0.02620 |
| BRMS1      | 0.21  | 10.22 | 2.29  | 0.02621 |
| PTMAP5     | 0.24  | 9.18  | 2.29  | 0.02623 |
| PCNP       | -0.18 | 8.59  | -2.29 | 0.02625 |
| CSRP1      | 0.18  | 10.03 | 2.29  | 0.02628 |
| EIF5B      | 0.33  | 10.41 | 2.29  | 0.02629 |
| TRAF3IP2   | 0.19  | 7.93  | 2.29  | 0.02629 |
| FBRSL1     | 0.20  | 10.00 | 2.29  | 0.02631 |
| PITPNC1    | 0.16  | 9.84  | 2.29  | 0.02632 |
| ATP6V1F    | 0.24  | 10.43 | 2.29  | 0.02636 |
| SLC66A3    | -0.17 | 8.27  | -2.29 | 0.02643 |
| RPS24      | 0.22  | 13.76 | 2.29  | 0.02643 |
| SIRT2      | 0.13  | 10.17 | 2.29  | 0.02644 |
| RALGAPA1   | -0.21 | 6.50  | -2.28 | 0.02646 |
| AC245100.8 | 0.23  | 6.73  | 2.28  | 0.02646 |
| UBN2       | -0.24 | 7.16  | -2.28 | 0.02648 |
| ZNF708     | -0.25 | 6.27  | -2.28 | 0.02648 |
| NHS        | -0.28 | 5.85  | -2.28 | 0.02653 |
| RPL9       | 0.28  | 12.84 | 2.28  | 0.02653 |
| STAM2      | -0.19 | 7.59  | -2.28 | 0.02658 |
| RPS19BP1   | 0.20  | 9.94  | 2.28  | 0.02662 |
| AC010359.3 | 0.25  | 5.17  | 2.28  | 0.02666 |
| AC105399.1 | 0.36  | 7.63  | 2.28  | 0.02666 |
| OBI1       | -0.17 | 6.84  | -2.28 | 0.02666 |

|            |       |       |       |         |
|------------|-------|-------|-------|---------|
| ZNF628     | 0.24  | 6.87  | 2.28  | 0.02667 |
| DYNLRB1    | 0.27  | 8.16  | 2.28  | 0.02668 |
| VEZF1      | -0.13 | 8.95  | -2.28 | 0.02670 |
| RPL13AP25  | 0.35  | 10.62 | 2.28  | 0.02675 |
| AC092620.1 | 0.44  | 6.65  | 2.28  | 0.02677 |
| ZBTB42     | 0.17  | 6.82  | 2.28  | 0.02684 |
| TRIM25     | -0.38 | 11.08 | -2.28 | 0.02684 |
| NDUFB8     | 0.25  | 7.77  | 2.28  | 0.02695 |
| CDC42SE1   | -0.21 | 12.65 | -2.28 | 0.02695 |
| SLC25A23   | 0.24  | 8.44  | 2.28  | 0.02696 |
| KRAS       | -0.18 | 8.26  | -2.28 | 0.02701 |
| FBXO11     | -0.23 | 8.45  | -2.28 | 0.02702 |
| RPL29P11   | 0.44  | 7.09  | 2.28  | 0.02702 |
| PAXBP1     | -0.25 | 7.25  | -2.28 | 0.02703 |
| ZNF518B    | -0.20 | 7.28  | -2.28 | 0.02707 |
| AC125807.1 | 0.23  | 5.80  | 2.28  | 0.02708 |
| GPATCH2L   | -0.13 | 8.32  | -2.27 | 0.02712 |
| DDRGK1     | 0.20  | 9.06  | 2.27  | 0.02713 |
| VEGFA      | -0.28 | 7.24  | -2.27 | 0.02717 |
| MGMT       | 0.28  | 8.13  | 2.27  | 0.02721 |
| DGKQ       | 0.26  | 9.52  | 2.27  | 0.02724 |
| ZNF700     | -0.28 | 7.47  | -2.27 | 0.02725 |
| AC005082.1 | -0.28 | 4.94  | -2.27 | 0.02730 |
| YPEL2      | -0.22 | 7.89  | -2.27 | 0.02736 |
| ADK        | 0.26  | 7.59  | 2.27  | 0.02739 |
| UBE2D4     | 0.18  | 7.50  | 2.27  | 0.02739 |
| GLIPR1     | -0.17 | 10.49 | -2.27 | 0.02747 |
| CAMSAP2    | -0.25 | 5.00  | -2.27 | 0.02749 |
| PHC3       | -0.22 | 8.11  | -2.27 | 0.02749 |
| NBN        | -0.22 | 8.20  | -2.27 | 0.02750 |
| ATRIP      | 0.17  | 7.82  | 2.27  | 0.02750 |
| DHRS9      | -0.41 | 8.09  | -2.27 | 0.02752 |
| VAR51      | 0.19  | 10.16 | 2.27  | 0.02754 |
| AC103769.1 | 0.38  | 5.60  | 2.27  | 0.02761 |
| RNF38      | -0.18 | 8.76  | -2.27 | 0.02764 |
| CLCN3      | -0.24 | 7.69  | -2.27 | 0.02766 |
| RPL6P27    | 0.31  | 10.64 | 2.27  | 0.02766 |
| RPL34      | 0.27  | 13.16 | 2.27  | 0.02767 |
| NUP107     | -0.20 | 7.67  | -2.27 | 0.02769 |
| CAPRIN1    | -0.15 | 9.85  | -2.26 | 0.02773 |
| PRMT7      | 0.17  | 8.77  | 2.26  | 0.02775 |
| DGKZ       | 0.13  | 12.25 | 2.26  | 0.02781 |
| AGO1       | -0.11 | 9.55  | -2.26 | 0.02783 |
| PRXL2A     | 0.32  | 6.48  | 2.26  | 0.02783 |
| KMT5B      | -0.13 | 9.27  | -2.26 | 0.02784 |
| P2RY13     | -0.31 | 10.83 | -2.26 | 0.02785 |
| LONRF3     | 0.22  | 5.36  | 2.26  | 0.02785 |
| ATP2C1     | -0.16 | 8.15  | -2.26 | 0.02790 |
| GPAT3      | -0.29 | 8.39  | -2.26 | 0.02791 |
| AP005019.1 | 0.25  | 5.95  | 2.26  | 0.02792 |

|            |       |       |       |         |
|------------|-------|-------|-------|---------|
| ZNF707     | 0.16  | 8.20  | 2.26  | 0.02794 |
| C1GALT1C1  | -0.18 | 7.17  | -2.26 | 0.02794 |
| MCL1       | -0.25 | 13.21 | -2.26 | 0.02795 |
| AL451085.1 | 0.36  | 5.47  | 2.26  | 0.02800 |
| CCDC130    | 0.18  | 9.36  | 2.26  | 0.02802 |
| STAG1      | -0.16 | 8.29  | -2.26 | 0.02802 |
| PTPN7      | 0.17  | 10.34 | 2.26  | 0.02806 |
| PUF60      | 0.18  | 10.94 | 2.26  | 0.02806 |
| MRPL40     | 0.20  | 8.15  | 2.26  | 0.02808 |
| SP100      | -0.22 | 10.48 | -2.26 | 0.02814 |
| MED6       | 0.16  | 8.00  | 2.26  | 0.02817 |
| RPL21      | 0.26  | 13.85 | 2.26  | 0.02818 |
| MOSPD3     | 0.22  | 8.39  | 2.26  | 0.02819 |
| RECQL      | -0.20 | 8.25  | -2.26 | 0.02820 |
| BRD9       | 0.13  | 9.55  | 2.26  | 0.02821 |
| MRPS2      | 0.23  | 8.84  | 2.26  | 0.02821 |
| TMX1       | -0.19 | 7.73  | -2.26 | 0.02825 |
| SLC12A6    | -0.29 | 10.40 | -2.26 | 0.02829 |
| COA4       | 0.19  | 8.37  | 2.26  | 0.02830 |
| MT1F       | 0.27  | 7.08  | 2.26  | 0.02836 |
| KDM2A      | -0.21 | 11.37 | -2.26 | 0.02838 |
| TNFAIP6    | -0.50 | 6.98  | -2.25 | 0.02843 |
| FBLN5      | 0.36  | 7.76  | 2.25  | 0.02844 |
| TELO2      | 0.21  | 8.78  | 2.25  | 0.02845 |
| AL590682.1 | 0.21  | 6.08  | 2.25  | 0.02848 |
| AC123912.4 | -0.66 | 6.73  | -2.25 | 0.02850 |
| AL118508.3 | -0.29 | 5.21  | -2.25 | 0.02852 |
| RPS2P48    | 0.18  | 5.22  | 2.25  | 0.02852 |
| CPSF4      | 0.16  | 8.72  | 2.25  | 0.02853 |
| COPA       | -0.15 | 10.86 | -2.25 | 0.02853 |
| RNF141     | -0.26 | 9.14  | -2.25 | 0.02856 |
| SSH2       | -0.26 | 11.60 | -2.25 | 0.02857 |
| AGMAT      | 0.27  | 7.01  | 2.25  | 0.02860 |
| PIK3R5     | -0.18 | 11.68 | -2.25 | 0.02860 |
| ZFR        | -0.26 | 8.17  | -2.25 | 0.02861 |
| PC         | 0.26  | 6.78  | 2.25  | 0.02862 |
| SLC25A26   | 0.20  | 7.81  | 2.25  | 0.02864 |
| ARIH2      | -0.11 | 9.87  | -2.25 | 0.02865 |
| ADM2       | 0.25  | 5.76  | 2.25  | 0.02866 |
| ERLIN2     | -0.16 | 7.63  | -2.25 | 0.02867 |
| SF3B5      | 0.23  | 10.79 | 2.25  | 0.02876 |
| LYSMD3     | -0.21 | 6.74  | -2.25 | 0.02878 |
| GCLC       | -0.24 | 7.11  | -2.25 | 0.02881 |
| PWP2       | 0.38  | 5.81  | 2.25  | 0.02882 |
| FAM189B    | 0.16  | 8.22  | 2.25  | 0.02886 |
| YWHAZ      | -0.14 | 12.23 | -2.25 | 0.02886 |
| MED12      | -0.18 | 10.41 | -2.25 | 0.02888 |
| AGO4       | -0.30 | 10.19 | -2.25 | 0.02889 |
| NRBF2      | -0.34 | 9.78  | -2.25 | 0.02894 |
| SYP        | 0.20  | 5.69  | 2.25  | 0.02895 |

|            |       |       |       |         |
|------------|-------|-------|-------|---------|
| LIG1       | 0.18  | 8.89  | 2.25  | 0.02897 |
| PAFAH1B1   | -0.12 | 10.53 | -2.25 | 0.02897 |
| RPP14      | 0.16  | 7.61  | 2.25  | 0.02898 |
| PF4        | 0.39  | 10.80 | 2.25  | 0.02905 |
| RRN3P3     | 0.29  | 7.13  | 2.25  | 0.02905 |
| SPAG9      | -0.27 | 8.78  | -2.24 | 0.02908 |
| NCOA6      | -0.17 | 9.59  | -2.24 | 0.02911 |
| MAP3K7     | -0.15 | 8.22  | -2.24 | 0.02915 |
| RAP1B      | -0.16 | 9.61  | -2.24 | 0.02920 |
| RPS10P3    | 0.27  | 6.27  | 2.24  | 0.02920 |
| TSHZ3      | -0.27 | 7.44  | -2.24 | 0.02922 |
| PFDN4      | 0.25  | 5.90  | 2.24  | 0.02922 |
| TCF12      | -0.20 | 7.89  | -2.24 | 0.02923 |
| QPCTL      | 0.20  | 7.02  | 2.24  | 0.02923 |
| MSANTD4    | -0.19 | 6.71  | -2.24 | 0.02923 |
| CIAO1      | 0.13  | 10.29 | 2.24  | 0.02924 |
| RSRP1      | -0.30 | 10.54 | -2.24 | 0.02925 |
| HMGCL      | 0.18  | 8.96  | 2.24  | 0.02927 |
| PRDM10     | -0.26 | 6.65  | -2.24 | 0.02927 |
| CCNG2      | -0.26 | 8.57  | -2.24 | 0.02932 |
| OAS2       | -0.44 | 10.27 | -2.24 | 0.02933 |
| RBM10      | 0.14  | 10.70 | 2.24  | 0.02933 |
| MRPL21     | 0.19  | 8.53  | 2.24  | 0.02947 |
| RPS6KA3    | -0.24 | 9.50  | -2.24 | 0.02948 |
| KANSL3     | -0.15 | 9.35  | -2.24 | 0.02950 |
| HNRNPA0    | 0.12  | 10.88 | 2.24  | 0.02959 |
| ADPGK      | -0.16 | 10.30 | -2.24 | 0.02960 |
| ALDH16A1   | 0.24  | 9.02  | 2.24  | 0.02962 |
| PDPK1      | -0.25 | 8.96  | -2.24 | 0.02967 |
| PPP1CA     | 0.20  | 12.69 | 2.24  | 0.02967 |
| DHCR7      | 0.20  | 7.54  | 2.24  | 0.02967 |
| DALRD3     | 0.16  | 8.79  | 2.24  | 0.02969 |
| IRF6       | -0.30 | 5.22  | -2.24 | 0.02974 |
| SP4        | -0.22 | 6.80  | -2.23 | 0.02977 |
| INTS6L     | -0.22 | 7.84  | -2.23 | 0.02977 |
| NAA25      | -0.21 | 6.71  | -2.23 | 0.02978 |
| FRYL       | -0.20 | 8.58  | -2.23 | 0.02979 |
| AC069218.1 | 0.30  | 7.31  | 2.23  | 0.02979 |
| DPM2       | 0.40  | 10.05 | 2.23  | 0.02981 |
| HIVEP1     | -0.25 | 7.84  | -2.23 | 0.02982 |
| CLINT1     | -0.28 | 8.21  | -2.23 | 0.02985 |
| ITGA2B     | 0.51  | 10.97 | 2.23  | 0.02987 |
| ASXL2      | -0.23 | 8.00  | -2.23 | 0.02988 |
| RAP1AP     | -0.30 | 5.34  | -2.23 | 0.02989 |
| PTGES2     | 0.19  | 8.93  | 2.23  | 0.02991 |
| DDX17      | -0.22 | 12.27 | -2.23 | 0.02991 |
| SLC31A2    | -0.34 | 9.57  | -2.23 | 0.02997 |
| NEFL       | 0.36  | 6.30  | 2.23  | 0.02998 |
| SDHAF1     | 0.26  | 7.14  | 2.23  | 0.03000 |
| AP3M1      | -0.16 | 8.84  | -2.23 | 0.03003 |

|            |       |       |       |         |
|------------|-------|-------|-------|---------|
| SMARCA2    | -0.18 | 10.23 | -2.23 | 0.03012 |
| SPIB       | 0.30  | 8.74  | 2.23  | 0.03014 |
| ISY1       | 0.21  | 9.08  | 2.23  | 0.03014 |
| CLIC5      | -0.23 | 5.83  | -2.23 | 0.03023 |
| RPL7       | 0.20  | 13.10 | 2.23  | 0.03024 |
| RPL18AP3   | 0.34  | 10.10 | 2.23  | 0.03026 |
| CCDC93     | -0.17 | 8.72  | -2.23 | 0.03034 |
| MINK1      | 0.14  | 11.25 | 2.23  | 0.03034 |
| TRBV10-3   | 0.30  | 6.45  | 2.23  | 0.03036 |
| TXNRD1     | -0.19 | 9.47  | -2.23 | 0.03039 |
| ZNF330     | -0.13 | 8.10  | -2.23 | 0.03044 |
| TMEM141    | 0.24  | 7.33  | 2.22  | 0.03049 |
| SORL1      | -0.37 | 12.80 | -2.22 | 0.03050 |
| PARVB      | 0.23  | 9.34  | 2.22  | 0.03052 |
| NEDD1      | -0.20 | 6.63  | -2.22 | 0.03052 |
| DHDDS      | 0.13  | 8.36  | 2.22  | 0.03058 |
| AC018475.1 | 0.31  | 6.23  | 2.22  | 0.03060 |
| EFNA4      | 0.28  | 7.27  | 2.22  | 0.03061 |
| RBFA       | 0.19  | 6.75  | 2.22  | 0.03066 |
| SERPINB9   | -0.22 | 9.14  | -2.22 | 0.03066 |
| SRGAP2     | -0.25 | 9.44  | -2.22 | 0.03068 |
| DTX1       | 0.41  | 8.16  | 2.22  | 0.03071 |
| ICAM2      | 0.20  | 10.89 | 2.22  | 0.03073 |
| BLZF1      | -0.22 | 6.60  | -2.22 | 0.03073 |
| DAP3       | 0.11  | 10.23 | 2.22  | 0.03078 |
| WDR11-AS1  | -0.29 | 5.74  | -2.22 | 0.03082 |
| CWF19L2    | 0.27  | 8.84  | 2.22  | 0.03083 |
| TRBV6-1    | 0.30  | 7.01  | 2.22  | 0.03085 |
| ESF1       | 0.31  | 7.67  | 2.22  | 0.03086 |
| PLEKHO1    | 0.19  | 12.12 | 2.22  | 0.03087 |
| NREP       | -0.20 | 6.74  | -2.22 | 0.03087 |
| GCAT       | 0.45  | 5.96  | 2.22  | 0.03092 |
| PSMC3      | 0.22  | 10.13 | 2.22  | 0.03096 |
| RAD52      | -0.21 | 6.63  | -2.22 | 0.03100 |
| CACTIN     | 0.18  | 8.70  | 2.22  | 0.03101 |
| ZFC3H1     | -0.22 | 8.33  | -2.22 | 0.03108 |
| AL162430.2 | 0.22  | 5.80  | 2.22  | 0.03110 |
| PEAK1      | -0.17 | 7.28  | -2.22 | 0.03111 |
| CCDC167    | 0.34  | 7.82  | 2.22  | 0.03116 |
| RPIA       | 0.15  | 8.74  | 2.22  | 0.03118 |
| NBL1       | 0.35  | 6.28  | 2.22  | 0.03118 |
| SOD1       | 0.21  | 10.44 | 2.21  | 0.03119 |
| GALNT3     | -0.31 | 6.81  | -2.21 | 0.03124 |
| GPATCH3    | 0.17  | 8.47  | 2.21  | 0.03125 |
| RPL15      | 0.20  | 13.98 | 2.21  | 0.03132 |
| STXBP5     | -0.28 | 8.07  | -2.21 | 0.03137 |
| AC079331.1 | 0.32  | 5.37  | 2.21  | 0.03141 |
| NSUN2      | -0.15 | 9.30  | -2.21 | 0.03145 |
| NDUFB9     | 0.22  | 10.24 | 2.21  | 0.03148 |
| IPMK       | -0.31 | 7.16  | -2.21 | 0.03151 |



|            |       |       |       |         |
|------------|-------|-------|-------|---------|
| TMEM201    | 0.16  | 6.88  | 2.21  | 0.03159 |
| MX2        | -0.34 | 11.88 | -2.21 | 0.03160 |
| TMEM181    | -0.20 | 8.08  | -2.21 | 0.03160 |
| MRPL12     | 0.26  | 5.58  | 2.21  | 0.03165 |
| RPS4X      | 0.28  | 14.28 | 2.21  | 0.03173 |
| RN7SL138P  | 0.32  | 5.42  | 2.21  | 0.03173 |
| TCEAL3     | 0.18  | 6.57  | 2.21  | 0.03174 |
| CKAP5      | -0.16 | 8.88  | -2.21 | 0.03180 |
| WDR24      | 0.17  | 8.44  | 2.21  | 0.03182 |
| SF3B2      | 0.13  | 12.28 | 2.21  | 0.03182 |
| ANKRD28    | -0.23 | 7.30  | -2.21 | 0.03183 |
| ACLY       | -0.16 | 10.40 | -2.21 | 0.03186 |
| RRM2B      | -0.25 | 7.70  | -2.21 | 0.03190 |
| CCDC174    | 0.12  | 8.91  | 2.20  | 0.03193 |
| ZNF611     | 0.26  | 7.43  | 2.20  | 0.03194 |
| KDM6A      | -0.30 | 7.80  | -2.20 | 0.03198 |
| TJP3       | 0.31  | 6.85  | 2.20  | 0.03199 |
| RPL31      | 0.22  | 13.88 | 2.20  | 0.03204 |
| SUSD6      | -0.27 | 11.20 | -2.20 | 0.03206 |
| KLF10      | -0.22 | 8.28  | -2.20 | 0.03208 |
| TRIM23     | -0.23 | 6.64  | -2.20 | 0.03215 |
| CCR3       | -0.48 | 8.93  | -2.20 | 0.03220 |
| CTSD       | 0.30  | 11.87 | 2.20  | 0.03226 |
| MRPS7      | 0.19  | 9.02  | 2.20  | 0.03229 |
| TPGS1      | 0.27  | 6.21  | 2.20  | 0.03235 |
| AP001505.1 | 0.26  | 5.20  | 2.20  | 0.03236 |
| QARS1      | 0.15  | 11.62 | 2.20  | 0.03243 |
| ZFPM1      | 0.25  | 7.71  | 2.20  | 0.03245 |
| AL161909.1 | 0.33  | 8.12  | 2.20  | 0.03246 |
| AGBL2      | -0.22 | 5.08  | -2.20 | 0.03252 |
| FH         | 0.14  | 8.30  | 2.20  | 0.03254 |
| CCDC57     | 0.18  | 9.05  | 2.20  | 0.03254 |
| NUDT14     | 0.27  | 7.04  | 2.20  | 0.03255 |
| PIP4P2     | -0.30 | 8.12  | -2.20 | 0.03258 |
| TUBB       | 0.12  | 12.02 | 2.20  | 0.03263 |
| ANKK1      | 0.28  | 5.24  | 2.20  | 0.03265 |
| ACTG1      | 0.17  | 15.66 | 2.20  | 0.03266 |
| CCT3       | 0.17  | 11.19 | 2.19  | 0.03271 |
| TMEM87B    | -0.18 | 7.61  | -2.19 | 0.03276 |
| MAFB       | -0.26 | 8.88  | -2.19 | 0.03282 |
| RNF25      | 0.18  | 8.41  | 2.19  | 0.03289 |
| RNF5       | 0.18  | 9.04  | 2.19  | 0.03290 |
| CCM2       | 0.16  | 11.84 | 2.19  | 0.03291 |
| BCL7B      | 0.18  | 10.25 | 2.19  | 0.03293 |
| KPNA3      | -0.20 | 7.54  | -2.19 | 0.03293 |
| ADD1       | 0.11  | 12.44 | 2.19  | 0.03294 |
| OGT        | -0.31 | 10.70 | -2.19 | 0.03294 |
| FBXL3      | -0.25 | 8.56  | -2.19 | 0.03296 |
| CHST15     | -0.31 | 11.08 | -2.19 | 0.03297 |
| DUS2       | 0.17  | 8.68  | 2.19  | 0.03298 |

|            |       |       |       |         |
|------------|-------|-------|-------|---------|
| SLC48A1    | 0.24  | 8.56  | 2.19  | 0.03301 |
| BLOC1S6    | -0.21 | 8.07  | -2.19 | 0.03303 |
| GIMAP8     | -0.21 | 10.53 | -2.19 | 0.03305 |
| PAXIP1     | -0.23 | 7.02  | -2.19 | 0.03308 |
| BRAT1      | 0.22  | 9.61  | 2.19  | 0.03321 |
| RNF103     | -0.18 | 7.86  | -2.19 | 0.03322 |
| OGFOD2     | 0.23  | 5.09  | 2.19  | 0.03322 |
| OGA        | -0.21 | 10.86 | -2.19 | 0.03323 |
| AASDH      | -0.17 | 6.60  | -2.19 | 0.03323 |
| EXOC2      | -0.15 | 8.47  | -2.19 | 0.03323 |
| PPP2R2D    | 0.12  | 9.59  | 2.19  | 0.03328 |
| ERG28      | 0.18  | 8.23  | 2.19  | 0.03330 |
| ZNF75D     | -0.14 | 7.53  | -2.19 | 0.03331 |
| NUP98      | -0.19 | 10.59 | -2.19 | 0.03332 |
| SLC35F5    | -0.21 | 7.27  | -2.19 | 0.03335 |
| MFSD1      | -0.18 | 9.52  | -2.19 | 0.03336 |
| AP000437.1 | 0.40  | 5.33  | 2.19  | 0.03339 |
| AC008038.1 | 0.30  | 10.81 | 2.19  | 0.03340 |
| FAM86JP    | 0.24  | 5.01  | 2.18  | 0.03349 |
| GOLPH3     | -0.16 | 9.36  | -2.18 | 0.03350 |
| MAP2K7     | 0.14  | 9.86  | 2.18  | 0.03350 |
| EHMT2      | 0.16  | 10.44 | 2.18  | 0.03351 |
| ETHE1      | 0.23  | 8.79  | 2.18  | 0.03355 |
| ELMSAN1    | -0.25 | 9.06  | -2.18 | 0.03358 |
| AC073210.3 | 0.35  | 5.24  | 2.18  | 0.03359 |
| FAM162A    | 0.21  | 7.81  | 2.18  | 0.03360 |
| CD274      | -0.36 | 6.52  | -2.18 | 0.03361 |
| KLF1       | 0.53  | 7.70  | 2.18  | 0.03364 |
| PLXNC1     | -0.35 | 10.99 | -2.18 | 0.03367 |
| NUMB       | -0.30 | 10.73 | -2.18 | 0.03367 |
| CRIP1      | 0.21  | 7.25  | 2.18  | 0.03367 |
| TMEM243    | 0.19  | 7.99  | 2.18  | 0.03370 |
| TNFSF10    | -0.33 | 10.82 | -2.18 | 0.03377 |
| HNRNPF     | -0.15 | 11.37 | -2.18 | 0.03379 |
| ENHO       | 0.35  | 6.44  | 2.18  | 0.03381 |
| AC040162.3 | 0.22  | 5.48  | 2.18  | 0.03382 |
| PPM1H      | -0.26 | 5.65  | -2.18 | 0.03393 |
| AC119044.1 | 0.22  | 6.92  | 2.18  | 0.03393 |
| PPP4R1L    | -0.26 | 7.20  | -2.18 | 0.03397 |
| PAWR       | 0.24  | 5.58  | 2.18  | 0.03398 |
| DOCK11     | -0.20 | 9.53  | -2.18 | 0.03404 |
| H2AX       | 0.20  | 8.10  | 2.18  | 0.03406 |
| AC006064.2 | -0.25 | 4.90  | -2.18 | 0.03408 |
| ZNF773     | 0.22  | 7.10  | 2.18  | 0.03411 |
| Z97989.1   | -0.24 | 5.36  | -2.18 | 0.03413 |
| ECHS1      | 0.22  | 9.50  | 2.18  | 0.03417 |
| AC078962.2 | 0.44  | 6.17  | 2.18  | 0.03418 |
| AP006621.5 | 0.32  | 5.71  | 2.18  | 0.03418 |
| AC004846.2 | -0.27 | 5.58  | -2.18 | 0.03418 |
| MYLIP      | -0.22 | 9.18  | -2.18 | 0.03420 |

|            |       |       |       |         |
|------------|-------|-------|-------|---------|
| RNF26      | 0.21  | 9.17  | 2.18  | 0.03421 |
| ICE1       | -0.21 | 8.35  | -2.18 | 0.03421 |
| AC104825.1 | -0.20 | 6.15  | -2.18 | 0.03422 |
| EXOSC5     | 0.23  | 8.10  | 2.18  | 0.03422 |
| BTN3A1     | -0.21 | 11.38 | -2.17 | 0.03423 |
| AP2A2      | 0.12  | 10.24 | 2.17  | 0.03432 |
| NEURL2     | 0.21  | 5.02  | 2.17  | 0.03432 |
| MRPL51     | 0.20  | 9.25  | 2.17  | 0.03436 |
| C1orf52    | -0.12 | 7.39  | -2.17 | 0.03439 |
| POLR1C     | 0.21  | 8.04  | 2.17  | 0.03439 |
| PHF1       | 0.14  | 10.56 | 2.17  | 0.03440 |
| WSB1       | -0.24 | 10.22 | -2.17 | 0.03442 |
| TRAPPC9    | 0.15  | 9.90  | 2.17  | 0.03443 |
| TUBGCP2    | 0.13  | 10.40 | 2.17  | 0.03449 |
| MRPL9      | 0.16  | 9.16  | 2.17  | 0.03449 |
| AC018738.1 | 0.25  | 7.33  | 2.17  | 0.03452 |
| APPL1      | -0.21 | 7.65  | -2.17 | 0.03455 |
| AC018628.2 | 0.20  | 5.18  | 2.17  | 0.03462 |
| PLPP1      | 0.20  | 6.02  | 2.17  | 0.03464 |
| LSM7       | 0.19  | 9.59  | 2.17  | 0.03464 |
| ZBTB49     | -0.15 | 7.48  | -2.17 | 0.03466 |
| TES        | -0.20 | 9.23  | -2.17 | 0.03467 |
| SAMD3      | -0.23 | 8.09  | -2.17 | 0.03470 |
| ZNF791     | 0.25  | 8.81  | 2.17  | 0.03472 |
| S100Z      | -0.22 | 6.33  | -2.17 | 0.03472 |
| DONSON     | -0.20 | 5.41  | -2.17 | 0.03473 |
| TIMM17B    | 0.20  | 9.33  | 2.17  | 0.03480 |
| AC015911.8 | 0.32  | 6.05  | 2.17  | 0.03489 |
| SUGP1      | 0.17  | 9.84  | 2.17  | 0.03489 |
| CMTR2      | -0.23 | 7.27  | -2.17 | 0.03490 |
| BTN2A1     | -0.21 | 10.20 | -2.17 | 0.03492 |
| THOP1      | 0.20  | 8.16  | 2.17  | 0.03492 |
| MYL5       | 0.22  | 6.55  | 2.17  | 0.03493 |
| SEC23IP    | -0.16 | 8.14  | -2.17 | 0.03493 |
| ZNF579     | 0.23  | 6.48  | 2.17  | 0.03498 |
| SMARCA4    | 0.14  | 10.92 | 2.17  | 0.03500 |
| CENPQ      | -0.20 | 5.45  | -2.16 | 0.03506 |
| AC136475.9 | -0.52 | 6.01  | -2.16 | 0.03506 |
| ZNF33A     | -0.21 | 9.13  | -2.16 | 0.03510 |
| ZBTB47     | -0.22 | 7.60  | -2.16 | 0.03512 |
| STARD9     | -0.26 | 6.52  | -2.16 | 0.03516 |
| UQCR11     | 0.24  | 8.55  | 2.16  | 0.03517 |
| REXO1      | 0.16  | 9.38  | 2.16  | 0.03520 |
| DTX2       | 0.20  | 9.28  | 2.16  | 0.03520 |
| RPL15P3    | 0.27  | 9.34  | 2.16  | 0.03521 |
| FLAD1      | 0.16  | 9.04  | 2.16  | 0.03521 |
| ARGLU1     | -0.22 | 9.54  | -2.16 | 0.03523 |
| GLI4       | 0.22  | 7.81  | 2.16  | 0.03524 |
| AP1M1      | 0.14  | 11.26 | 2.16  | 0.03525 |
| MPI        | 0.18  | 9.06  | 2.16  | 0.03526 |

|            |       |       |       |         |
|------------|-------|-------|-------|---------|
| RNPS1      | 0.14  | 11.19 | 2.16  | 0.03528 |
| TAPT1      | -0.15 | 7.67  | -2.16 | 0.03531 |
| MPHOSPH8   | 0.26  | 10.68 | 2.16  | 0.03532 |
| ACTG1P9    | 0.20  | 5.20  | 2.16  | 0.03533 |
| MKLN1-AS   | 0.20  | 5.65  | 2.16  | 0.03533 |
| SIVA1      | 0.20  | 8.90  | 2.16  | 0.03536 |
| KMT2D      | -0.24 | 11.15 | -2.16 | 0.03538 |
| BRPF3      | -0.24 | 8.59  | -2.16 | 0.03542 |
| AC069213.3 | 0.29  | 5.46  | 2.16  | 0.03544 |
| EPC2       | -0.22 | 7.88  | -2.16 | 0.03545 |
| DMXL1      | -0.22 | 6.97  | -2.16 | 0.03547 |
| DENND5B    | 0.26  | 6.01  | 2.16  | 0.03547 |
| WAC        | -0.19 | 10.59 | -2.16 | 0.03550 |
| OTULINL    | -0.17 | 8.79  | -2.16 | 0.03555 |
| CYB5D2     | 0.15  | 7.61  | 2.16  | 0.03556 |
| MPG        | 0.22  | 8.60  | 2.16  | 0.03558 |
| PSMD10     | -0.15 | 7.74  | -2.16 | 0.03561 |
| MBTPS2     | -0.21 | 5.79  | -2.16 | 0.03562 |
| HELZ2      | -0.32 | 11.01 | -2.16 | 0.03562 |
| RPSAP61    | 0.20  | 5.51  | 2.16  | 0.03562 |
| CTNND1     | -0.24 | 5.34  | -2.16 | 0.03563 |
| ZNF322     | -0.23 | 5.28  | -2.16 | 0.03568 |
| CSNK1E     | 0.17  | 8.48  | 2.16  | 0.03569 |
| TMEM50A    | -0.17 | 10.52 | -2.16 | 0.03571 |
| LINC01550  | 0.26  | 6.88  | 2.16  | 0.03572 |
| CARD11     | 0.16  | 11.23 | 2.16  | 0.03575 |
| GFPT1      | -0.18 | 7.10  | -2.16 | 0.03576 |
| FBXO31     | 0.17  | 9.18  | 2.16  | 0.03577 |
| NFIA       | 0.29  | 7.02  | 2.16  | 0.03578 |
| RUNX3      | 0.26  | 12.45 | 2.16  | 0.03578 |
| FBXO8      | -0.17 | 6.72  | -2.16 | 0.03580 |
| CDK5R1     | -0.33 | 7.65  | -2.16 | 0.03582 |
| TRAV36DV7  | 0.28  | 5.41  | 2.15  | 0.03584 |
| AC254562.3 | 0.27  | 4.95  | 2.15  | 0.03588 |
| ELOB       | 0.26  | 11.48 | 2.15  | 0.03591 |
| LCP2       | -0.19 | 11.69 | -2.15 | 0.03591 |
| AC016739.1 | 0.32  | 10.55 | 2.15  | 0.03591 |
| SETD1A     | 0.14  | 9.75  | 2.15  | 0.03592 |
| YIPF2      | 0.16  | 7.95  | 2.15  | 0.03592 |
| PSTPIP2    | -0.39 | 8.51  | -2.15 | 0.03592 |
| AQR        | -0.12 | 8.86  | -2.15 | 0.03595 |
| IFNAR1     | -0.21 | 10.28 | -2.15 | 0.03599 |
| TESK1      | 0.15  | 9.28  | 2.15  | 0.03599 |
| STAU1      | -0.14 | 9.84  | -2.15 | 0.03601 |
| COMMD10    | -0.17 | 6.91  | -2.15 | 0.03603 |
| XYLT2      | 0.13  | 8.76  | 2.15  | 0.03605 |
| SYNE1      | -0.19 | 10.92 | -2.15 | 0.03611 |
| ZNF143     | -0.18 | 7.89  | -2.15 | 0.03612 |
| SNF8       | 0.18  | 9.67  | 2.15  | 0.03615 |
| B4GAT1     | 0.22  | 6.75  | 2.15  | 0.03615 |

|            |       |       |       |         |
|------------|-------|-------|-------|---------|
| PITHD1     | 0.17  | 9.46  | 2.15  | 0.03618 |
| CHORDC1    | -0.21 | 7.03  | -2.15 | 0.03620 |
| ARMC7      | 0.17  | 9.13  | 2.15  | 0.03621 |
| RPL36A     | 0.23  | 5.67  | 2.15  | 0.03621 |
| GCC1       | -0.13 | 9.06  | -2.15 | 0.03622 |
| DDX41      | 0.14  | 10.45 | 2.15  | 0.03622 |
| INTS1      | 0.14  | 10.96 | 2.15  | 0.03623 |
| NOB1       | 0.18  | 9.73  | 2.15  | 0.03624 |
| CD79A      | 0.42  | 11.44 | 2.15  | 0.03626 |
| NHLRC2     | -0.19 | 6.75  | -2.15 | 0.03627 |
| PHF11      | -0.22 | 8.95  | -2.15 | 0.03634 |
| POLR2J     | 0.22  | 9.17  | 2.15  | 0.03636 |
| AL139246.5 | 0.25  | 6.18  | 2.15  | 0.03636 |
| HHLA3      | 0.25  | 6.07  | 2.15  | 0.03636 |
| STX5       | 0.17  | 10.35 | 2.15  | 0.03640 |
| HHEX       | -0.19 | 8.76  | -2.15 | 0.03641 |
| POLRMT     | 0.16  | 9.84  | 2.15  | 0.03642 |
| Z99129.4   | -0.22 | 5.89  | -2.15 | 0.03643 |
| AP2S1      | 0.23  | 10.07 | 2.15  | 0.03646 |
| SF3B4      | 0.17  | 10.39 | 2.15  | 0.03649 |
| SENP7      | -0.24 | 7.06  | -2.15 | 0.03650 |
| WDR47      | -0.21 | 6.93  | -2.15 | 0.03654 |
| AURKAIP1   | 0.21  | 10.27 | 2.15  | 0.03654 |
| ITM2B      | -0.27 | 13.11 | -2.15 | 0.03656 |
| TXNDC11    | 0.16  | 9.56  | 2.15  | 0.03662 |
| ETFB       | 0.24  | 8.76  | 2.15  | 0.03662 |
| RPL21P16   | 0.28  | 9.76  | 2.14  | 0.03667 |
| ARMCX6     | 0.18  | 7.12  | 2.14  | 0.03669 |
| USO1       | -0.17 | 8.52  | -2.14 | 0.03674 |
| AGPAT5     | -0.22 | 6.93  | -2.14 | 0.03676 |
| EEF1B2P2   | 0.22  | 5.47  | 2.14  | 0.03677 |
| PPIG       | 0.28  | 10.01 | 2.14  | 0.03680 |
| NR2C1      | -0.24 | 6.59  | -2.14 | 0.03683 |
| RANBP9     | -0.17 | 8.28  | -2.14 | 0.03684 |
| SMIM7      | 0.17  | 8.56  | 2.14  | 0.03688 |
| DNAJC17    | 0.18  | 8.10  | 2.14  | 0.03691 |
| RMDN2      | -0.23 | 5.27  | -2.14 | 0.03695 |
| RSPRY1     | -0.15 | 7.81  | -2.14 | 0.03696 |
| RABGAP1L   | -0.15 | 9.41  | -2.14 | 0.03700 |
| MKRN2      | -0.16 | 8.19  | -2.14 | 0.03700 |
| YTHDC2     | -0.19 | 7.23  | -2.14 | 0.03702 |
| AP2M1      | 0.16  | 12.50 | 2.14  | 0.03702 |
| POP7       | 0.18  | 8.27  | 2.14  | 0.03703 |
| AL359962.1 | 0.35  | 5.18  | 2.14  | 0.03704 |
| AC079250.1 | 0.31  | 8.59  | 2.14  | 0.03707 |
| TIMM44     | 0.18  | 8.55  | 2.14  | 0.03713 |
| ZMYM5      | -0.22 | 6.76  | -2.14 | 0.03716 |
| STK4       | -0.15 | 10.70 | -2.14 | 0.03718 |
| NPTN       | -0.24 | 9.54  | -2.14 | 0.03722 |
| REX1BD     | 0.20  | 8.61  | 2.14  | 0.03723 |

|            |       |       |       |         |
|------------|-------|-------|-------|---------|
| TM9SF3     | -0.14 | 9.28  | -2.14 | 0.03728 |
| DCLRE1C    | 0.25  | 8.98  | 2.14  | 0.03729 |
| SCAMP3     | 0.17  | 9.77  | 2.14  | 0.03742 |
| AC068137.1 | 0.32  | 6.27  | 2.14  | 0.03745 |
| LINC02245  | 0.27  | 6.24  | 2.14  | 0.03750 |
| NUP62      | 0.14  | 10.43 | 2.13  | 0.03755 |
| CDK9       | 0.11  | 10.16 | 2.13  | 0.03757 |
| CCDC9      | 0.19  | 9.01  | 2.13  | 0.03758 |
| SNAP23     | -0.24 | 9.44  | -2.13 | 0.03761 |
| CHCHD1     | 0.20  | 8.28  | 2.13  | 0.03763 |
| IL6R-AS1   | 0.22  | 5.05  | 2.13  | 0.03767 |
| KCTD21-AS1 | 0.33  | 4.91  | 2.13  | 0.03774 |
| TAF6       | 0.15  | 9.67  | 2.13  | 0.03776 |
| GTPBP6     | 0.17  | 9.88  | 2.13  | 0.03779 |
| RAB5B      | -0.16 | 10.56 | -2.13 | 0.03782 |
| FAM185A    | -0.15 | 5.26  | -2.13 | 0.03783 |
| AC091057.1 | -0.24 | 5.11  | -2.13 | 0.03788 |
| PYCR1      | 0.28  | 5.16  | 2.13  | 0.03788 |
| IGHV5-10-1 | 0.65  | 6.06  | 2.13  | 0.03792 |
| CANX       | -0.16 | 10.79 | -2.13 | 0.03792 |
| ZNF326     | -0.20 | 6.55  | -2.13 | 0.03792 |
| FBXL19-AS1 | 0.22  | 5.11  | 2.13  | 0.03794 |
| DNAJC9     | 0.15  | 7.91  | 2.13  | 0.03796 |
| LEMD3      | -0.21 | 7.60  | -2.13 | 0.03797 |
| ZNF664     | -0.19 | 7.75  | -2.13 | 0.03798 |
| SMG7       | -0.14 | 10.14 | -2.13 | 0.03802 |
| ZNF212     | 0.15  | 8.26  | 2.13  | 0.03803 |
| TAGAP      | -0.23 | 11.64 | -2.13 | 0.03805 |
| JAG1       | -0.27 | 5.78  | -2.13 | 0.03808 |
| LTA        | 0.25  | 7.61  | 2.13  | 0.03813 |
| CLASP1     | -0.19 | 8.72  | -2.13 | 0.03815 |
| EIF2B2     | 0.15  | 8.24  | 2.13  | 0.03816 |
| THYN1      | 0.17  | 8.91  | 2.13  | 0.03816 |
| ATP11C     | -0.21 | 6.56  | -2.13 | 0.03818 |
| USP11      | 0.14  | 9.89  | 2.13  | 0.03818 |
| ZNF624     | -0.21 | 5.33  | -2.13 | 0.03820 |
| MNDA       | -0.29 | 13.55 | -2.13 | 0.03823 |
| WDR33      | 0.10  | 9.98  | 2.13  | 0.03831 |
| HLA-DQB1   | 0.41  | 11.79 | 2.13  | 0.03832 |
| EPS8L2     | 0.24  | 6.75  | 2.13  | 0.03832 |
| TPP1       | -0.14 | 11.63 | -2.13 | 0.03834 |
| SLC5A3     | -0.19 | 6.81  | -2.12 | 0.03839 |
| APEX1      | 0.16  | 10.84 | 2.12  | 0.03840 |
| TP53TG1    | 0.21  | 7.40  | 2.12  | 0.03842 |
| NSRP1P1    | 0.28  | 5.70  | 2.12  | 0.03845 |
| MSN        | -0.19 | 13.64 | -2.12 | 0.03848 |
| AC092944.1 | -0.25 | 5.35  | -2.12 | 0.03852 |
| ACO2       | 0.13  | 10.83 | 2.12  | 0.03853 |
| NMI        | -0.27 | 9.51  | -2.12 | 0.03862 |
| IDS        | -0.24 | 7.83  | -2.12 | 0.03864 |

|            |       |       |       |         |
|------------|-------|-------|-------|---------|
| HEIH       | 0.17  | 9.70  | 2.12  | 0.03867 |
| RPS4XP7    | 0.28  | 5.90  | 2.12  | 0.03876 |
| ZNF720     | -0.16 | 6.62  | -2.12 | 0.03878 |
| PRKCI      | -0.19 | 6.35  | -2.12 | 0.03881 |
| LYN        | -0.28 | 12.60 | -2.12 | 0.03882 |
| SLC9A6     | -0.17 | 7.39  | -2.12 | 0.03884 |
| MS4A6A     | -0.18 | 10.74 | -2.12 | 0.03885 |
| SDHAF2     | 0.21  | 8.31  | 2.12  | 0.03885 |
| LCP1       | -0.20 | 14.61 | -2.12 | 0.03885 |
| HDDC2      | 0.18  | 8.40  | 2.12  | 0.03887 |
| AC099548.2 | 0.23  | 5.56  | 2.12  | 0.03888 |
| AL160006.1 | -0.16 | 7.25  | -2.12 | 0.03896 |
| UBE2W      | -0.22 | 7.72  | -2.12 | 0.03900 |
| PELI3      | 0.25  | 7.69  | 2.12  | 0.03901 |
| EEF1B2P3   | 0.31  | 8.70  | 2.12  | 0.03905 |
| RNF6       | -0.22 | 7.63  | -2.12 | 0.03907 |
| MXD1       | -0.38 | 12.07 | -2.12 | 0.03909 |
| CDPF1      | 0.18  | 7.69  | 2.12  | 0.03912 |
| AC008764.8 | -0.23 | 5.59  | -2.12 | 0.03915 |
| FAM49B     | -0.23 | 10.53 | -2.12 | 0.03916 |
| PSMD4      | 0.17  | 11.17 | 2.12  | 0.03922 |
| ACSL3      | -0.17 | 7.99  | -2.12 | 0.03926 |
| AP4S1      | 0.18  | 6.81  | 2.11  | 0.03935 |
| PGAP3      | 0.18  | 9.19  | 2.11  | 0.03941 |
| MED19      | 0.18  | 7.61  | 2.11  | 0.03944 |
| ANKRD54    | 0.16  | 8.04  | 2.11  | 0.03945 |
| AL109955.1 | 0.23  | 5.50  | 2.11  | 0.03945 |
| ZC3H7A     | -0.17 | 8.43  | -2.11 | 0.03948 |
| USP9X      | -0.18 | 9.86  | -2.11 | 0.03949 |
| LCORL      | -0.16 | 5.98  | -2.11 | 0.03951 |
| USP32      | -0.28 | 9.60  | -2.11 | 0.03954 |
| PCED1B     | 0.23  | 10.31 | 2.11  | 0.03954 |
| PRKAR2A    | 0.18  | 9.27  | 2.11  | 0.03954 |
| THBD       | -0.42 | 8.50  | -2.11 | 0.03955 |
| AC027097.1 | 0.21  | 6.72  | 2.11  | 0.03957 |
| FRS2       | -0.17 | 6.58  | -2.11 | 0.03960 |
| PTTG1IP    | -0.15 | 11.04 | -2.11 | 0.03969 |
| TECRP1     | 0.26  | 7.15  | 2.11  | 0.03969 |
| ZFX        | -0.24 | 7.56  | -2.11 | 0.03972 |
| FRS3       | 0.17  | 6.83  | 2.11  | 0.03974 |
| PLD1       | -0.21 | 6.51  | -2.11 | 0.03974 |
| SCAF8      | -0.26 | 7.90  | -2.11 | 0.03978 |
| VMP1       | -0.29 | 11.66 | -2.11 | 0.03985 |
| AVL9       | -0.20 | 8.45  | -2.11 | 0.03985 |
| EAF1       | -0.20 | 8.00  | -2.11 | 0.03988 |
| CASP2      | -0.14 | 9.26  | -2.11 | 0.03990 |
| FAM133B    | 0.29  | 7.54  | 2.11  | 0.03991 |
| CPLANE1    | -0.20 | 5.72  | -2.11 | 0.03999 |
| MKI67      | -0.28 | 6.99  | -2.11 | 0.04001 |
| CHD1       | -0.22 | 8.56  | -2.11 | 0.04001 |

|            |       |       |       |         |
|------------|-------|-------|-------|---------|
| THAP7-AS1  | 0.23  | 5.32  | 2.11  | 0.04005 |
| SNPH       | 0.24  | 7.72  | 2.11  | 0.04009 |
| IGLL5      | 0.44  | 5.46  | 2.11  | 0.04010 |
| SAMM50     | 0.18  | 9.47  | 2.11  | 0.04010 |
| NDUFS3     | 0.18  | 9.26  | 2.11  | 0.04012 |
| ASAH1      | -0.21 | 11.17 | -2.11 | 0.04014 |
| MTMR10     | -0.20 | 9.35  | -2.11 | 0.04014 |
| SAC3D1     | 0.24  | 6.47  | 2.11  | 0.04017 |
| NACA       | 0.16  | 12.67 | 2.10  | 0.04018 |
| POGZ       | -0.16 | 9.36  | -2.10 | 0.04020 |
| ZNF446     | 0.16  | 8.00  | 2.10  | 0.04024 |
| ARL15      | -0.17 | 6.92  | -2.10 | 0.04025 |
| NSD3       | -0.11 | 9.89  | -2.10 | 0.04027 |
| ZNF414     | 0.18  | 8.00  | 2.10  | 0.04028 |
| AL683813.2 | 0.26  | 5.63  | 2.10  | 0.04030 |
| TSEN15     | -0.16 | 7.42  | -2.10 | 0.04036 |
| UBQLN2     | -0.18 | 9.28  | -2.10 | 0.04042 |
| IL32       | 0.31  | 12.26 | 2.10  | 0.04051 |
| HBP1       | -0.23 | 9.48  | -2.10 | 0.04053 |
| NOL7       | 0.15  | 8.90  | 2.10  | 0.04059 |
| LINC02273  | 0.36  | 7.89  | 2.10  | 0.04063 |
| AC010536.1 | 0.25  | 4.96  | 2.10  | 0.04067 |
| DNAJB14    | -0.20 | 7.28  | -2.10 | 0.04068 |
| FBXO30     | -0.27 | 6.63  | -2.10 | 0.04074 |
| ZCCHC17    | 0.16  | 9.12  | 2.10  | 0.04076 |
| LIN7A      | -0.30 | 8.06  | -2.10 | 0.04080 |
| RAB6A      | -0.17 | 8.98  | -2.10 | 0.04080 |
| SCYL2      | -0.21 | 7.83  | -2.10 | 0.04085 |
| AP001324.1 | 0.29  | 10.60 | 2.10  | 0.04085 |
| CSF2RB     | -0.40 | 11.91 | -2.10 | 0.04087 |
| DOP1A      | -0.17 | 7.45  | -2.10 | 0.04091 |
| C12orf75   | -0.26 | 8.02  | -2.10 | 0.04094 |
| SLC30A5    | -0.19 | 7.27  | -2.10 | 0.04095 |
| AC133435.1 | 0.22  | 6.56  | 2.10  | 0.04099 |
| FAM102A    | 0.24  | 11.35 | 2.10  | 0.04108 |
| SYNE2      | -0.18 | 11.27 | -2.10 | 0.04108 |
| TRIM24     | -0.17 | 7.54  | -2.09 | 0.04110 |
| PPP1R7     | 0.16  | 10.30 | 2.09  | 0.04111 |
| LGALS1     | 0.33  | 11.03 | 2.09  | 0.04111 |
| USP28      | -0.19 | 8.17  | -2.09 | 0.04116 |
| MTPN       | -0.19 | 10.50 | -2.09 | 0.04119 |
| JMJD4      | 0.19  | 8.20  | 2.09  | 0.04124 |
| ITSN2      | -0.17 | 9.92  | -2.09 | 0.04124 |
| TXNL4A     | 0.16  | 9.52  | 2.09  | 0.04126 |
| PPP2R5C    | -0.13 | 10.86 | -2.09 | 0.04129 |
| CAPZA1     | -0.20 | 10.79 | -2.09 | 0.04130 |
| UBE4A      | -0.20 | 8.55  | -2.09 | 0.04132 |
| KRT18      | 0.24  | 6.27  | 2.09  | 0.04138 |
| SGK3       | -0.17 | 7.90  | -2.09 | 0.04138 |
| EIF4G2     | -0.15 | 12.30 | -2.09 | 0.04139 |



|            |       |       |       |         |
|------------|-------|-------|-------|---------|
| HSD17B10   | 0.22  | 9.36  | 2.09  | 0.04141 |
| DTHD1      | -0.20 | 5.25  | -2.09 | 0.04142 |
| FBXO44     | 0.20  | 9.05  | 2.09  | 0.04144 |
| PMF1       | 0.18  | 8.26  | 2.09  | 0.04145 |
| CD36       | -0.28 | 9.83  | -2.09 | 0.04150 |
| SEC22B     | -0.17 | 8.13  | -2.09 | 0.04159 |
| RPS13P2    | 0.27  | 9.23  | 2.09  | 0.04159 |
| KRCC1      | -0.20 | 7.80  | -2.09 | 0.04166 |
| ADCY4      | -0.28 | 7.43  | -2.09 | 0.04168 |
| LAMTOR2    | 0.24  | 9.40  | 2.09  | 0.04171 |
| AC092119.2 | -0.22 | 5.13  | -2.09 | 0.04174 |
| THUMPD3    | -0.17 | 7.54  | -2.09 | 0.04177 |
| ZNF763     | 0.18  | 6.39  | 2.09  | 0.04179 |
| PPP3R1     | -0.16 | 9.52  | -2.09 | 0.04180 |
| AGPS       | -0.17 | 7.47  | -2.09 | 0.04181 |
| AL035398.1 | 0.26  | 5.94  | 2.09  | 0.04182 |
| RPL13AP5   | 0.30  | 11.45 | 2.09  | 0.04186 |
| SAPCD1-AS1 | 0.27  | 4.98  | 2.09  | 0.04188 |
| SLC25A42   | 0.15  | 8.51  | 2.09  | 0.04188 |
| RPL21P119  | 0.23  | 7.93  | 2.09  | 0.04188 |
| ANXA6      | 0.19  | 13.16 | 2.09  | 0.04191 |
| VPREB3     | 0.31  | 7.35  | 2.09  | 0.04194 |
| DAZAP1     | 0.13  | 10.59 | 2.09  | 0.04194 |
| RARG       | 0.20  | 8.64  | 2.09  | 0.04196 |
| ZNF567     | -0.16 | 5.71  | -2.09 | 0.04198 |
| RRP9       | 0.22  | 8.01  | 2.09  | 0.04200 |
| PMS1       | -0.18 | 6.23  | -2.09 | 0.04201 |
| NBPF26     | -0.29 | 7.95  | -2.08 | 0.04203 |
| CCDC34     | 0.32  | 6.27  | 2.08  | 0.04206 |
| NOP14-AS1  | 0.14  | 7.76  | 2.08  | 0.04215 |
| PIP5K1C    | 0.14  | 9.89  | 2.08  | 0.04216 |
| ACTR10     | -0.13 | 8.24  | -2.08 | 0.04216 |
| FBXW2      | -0.12 | 9.45  | -2.08 | 0.04218 |
| ESYT2      | -0.15 | 10.09 | -2.08 | 0.04220 |
| KLHL18     | -0.15 | 8.77  | -2.08 | 0.04229 |
| SLC29A2    | 0.23  | 6.58  | 2.08  | 0.04233 |
| AL034397.3 | -0.38 | 10.59 | -2.08 | 0.04234 |
| LYRM7      | 0.21  | 7.07  | 2.08  | 0.04236 |
| KIAA0319   | -0.27 | 6.07  | -2.08 | 0.04239 |
| SIGMAR1    | 0.14  | 8.91  | 2.08  | 0.04243 |
| TRAFD1     | -0.24 | 10.75 | -2.08 | 0.04249 |
| ZSWIM9     | 0.20  | 7.06  | 2.08  | 0.04249 |
| CD93       | -0.31 | 11.09 | -2.08 | 0.04251 |
| CCR1       | -0.34 | 10.07 | -2.08 | 0.04254 |
| INTS11     | 0.15  | 10.75 | 2.08  | 0.04254 |
| LINC02812  | 0.32  | 5.69  | 2.08  | 0.04256 |
| SPART      | -0.23 | 8.12  | -2.08 | 0.04259 |
| NT5C3AP1   | -0.26 | 5.18  | -2.08 | 0.04262 |
| BCAS4      | 0.25  | 8.07  | 2.08  | 0.04262 |
| RASA2      | -0.30 | 7.53  | -2.08 | 0.04263 |

|            |       |       |       |         |
|------------|-------|-------|-------|---------|
| S100A5     | 0.19  | 5.01  | 2.08  | 0.04264 |
| DAB2       | -0.23 | 7.59  | -2.08 | 0.04268 |
| AC243919.1 | 0.30  | 10.43 | 2.08  | 0.04268 |
| ETNK1      | -0.19 | 8.05  | -2.08 | 0.04272 |
| SYTL2      | -0.24 | 7.55  | -2.08 | 0.04273 |
| ZNF815P    | 0.23  | 6.97  | 2.08  | 0.04275 |
| MED14      | -0.18 | 8.18  | -2.08 | 0.04277 |
| ZNF296     | 0.26  | 7.71  | 2.08  | 0.04277 |
| LMF2       | 0.17  | 10.26 | 2.08  | 0.04281 |
| CLK1       | -0.25 | 9.93  | -2.08 | 0.04282 |
| WDR20      | -0.15 | 8.09  | -2.08 | 0.04284 |
| MTMR3      | -0.25 | 10.89 | -2.08 | 0.04285 |
| MOB4       | -0.19 | 6.62  | -2.08 | 0.04288 |
| RAB12      | -0.18 | 7.18  | -2.08 | 0.04290 |
| TLR1       | -0.28 | 9.42  | -2.08 | 0.04291 |
| SMIM13     | -0.17 | 6.01  | -2.08 | 0.04292 |
| MDM4       | -0.20 | 8.88  | -2.08 | 0.04296 |
| OSBP       | -0.14 | 9.05  | -2.07 | 0.04298 |
| C9orf78    | 0.52  | 12.48 | 2.07  | 0.04299 |
| BBS10      | -0.24 | 5.78  | -2.07 | 0.04304 |
| MAPRE1     | -0.15 | 10.21 | -2.07 | 0.04306 |
| RPS12P23   | 0.20  | 5.06  | 2.07  | 0.04308 |
| SLC2A11    | 0.20  | 6.77  | 2.07  | 0.04308 |
| ANXA11     | 0.19  | 13.06 | 2.07  | 0.04312 |
| MAGED2     | 0.14  | 10.06 | 2.07  | 0.04312 |
| TBCB       | 0.17  | 10.18 | 2.07  | 0.04315 |
| PAK1       | -0.20 | 11.41 | -2.07 | 0.04316 |
| ALKBH2     | 0.21  | 7.13  | 2.07  | 0.04320 |
| EFCAB14    | -0.15 | 9.97  | -2.07 | 0.04320 |
| MTA2       | 0.13  | 11.37 | 2.07  | 0.04320 |
| SUDS3      | -0.13 | 8.90  | -2.07 | 0.04320 |
| ATP11B     | -0.26 | 8.82  | -2.07 | 0.04321 |
| DNAJA3     | 0.15  | 8.98  | 2.07  | 0.04321 |
| PRKAA1     | -0.20 | 7.91  | -2.07 | 0.04322 |
| AZI2       | -0.16 | 8.08  | -2.07 | 0.04328 |
| TTC13      | -0.21 | 7.71  | -2.07 | 0.04328 |
| EP300      | -0.31 | 10.35 | -2.07 | 0.04331 |
| ARL6IP6    | -0.20 | 7.27  | -2.07 | 0.04332 |
| ASCC2      | 0.35  | 12.05 | 2.07  | 0.04333 |
| NXT1       | 0.20  | 7.80  | 2.07  | 0.04337 |
| PTGER2     | -0.14 | 8.09  | -2.07 | 0.04340 |
| UHRF2      | -0.18 | 7.83  | -2.07 | 0.04340 |
| TRAV3      | 0.30  | 6.39  | 2.07  | 0.04341 |
| RIPK2      | -0.18 | 7.66  | -2.07 | 0.04341 |
| CTSF       | 0.22  | 7.55  | 2.07  | 0.04343 |
| URGCP      | 0.17  | 8.65  | 2.07  | 0.04353 |
| ACTR3      | -0.20 | 10.99 | -2.07 | 0.04354 |
| BLOC1S4    | 0.15  | 8.39  | 2.07  | 0.04359 |
| SDCBPP3    | -0.39 | 6.27  | -2.07 | 0.04360 |
| SERTAD1    | 0.19  | 8.01  | 2.07  | 0.04362 |

|            |       |       |       |         |
|------------|-------|-------|-------|---------|
| TRIP12     | -0.18 | 10.59 | -2.07 | 0.04371 |
| TRERF1     | -0.17 | 8.77  | -2.07 | 0.04373 |
| PTCRA      | 0.31  | 7.26  | 2.07  | 0.04377 |
| TMED7      | -0.20 | 7.33  | -2.07 | 0.04377 |
| PTGES3P1   | -0.26 | 7.05  | -2.07 | 0.04381 |
| NTAN1      | 0.19  | 8.76  | 2.07  | 0.04382 |
| ZNF667-AS1 | -0.26 | 5.53  | -2.07 | 0.04383 |
| GGT7       | 0.23  | 8.26  | 2.07  | 0.04385 |
| LEPR       | -0.22 | 5.32  | -2.07 | 0.04386 |
| TFG        | -0.14 | 8.73  | -2.06 | 0.04396 |
| BTN3A2     | 0.24  | 11.87 | 2.06  | 0.04398 |
| AP003486.1 | -0.22 | 6.68  | -2.06 | 0.04400 |
| PSENN      | 0.24  | 8.36  | 2.06  | 0.04401 |
| PTPA       | 0.18  | 10.68 | 2.06  | 0.04401 |
| WFS1       | 0.19  | 6.71  | 2.06  | 0.04402 |
| CA2        | -0.36 | 7.90  | -2.06 | 0.04403 |
| MPND       | 0.20  | 8.65  | 2.06  | 0.04409 |
| TTC37      | -0.21 | 7.98  | -2.06 | 0.04411 |
| LILRA1     | -0.22 | 10.56 | -2.06 | 0.04413 |
| COMMD4     | 0.20  | 8.53  | 2.06  | 0.04421 |
| ZNF865     | 0.19  | 9.47  | 2.06  | 0.04425 |
| RGS18      | -0.34 | 9.16  | -2.06 | 0.04440 |
| MOSPD1     | -0.23 | 5.98  | -2.06 | 0.04442 |
| ZNF25      | -0.20 | 6.20  | -2.06 | 0.04444 |
| NFKBIB     | 0.19  | 9.41  | 2.06  | 0.04446 |
| TRA2A      | -0.14 | 9.37  | -2.06 | 0.04451 |
| MON1A      | 0.19  | 7.61  | 2.06  | 0.04454 |
| PHF23      | 0.14  | 10.19 | 2.06  | 0.04456 |
| TRAF6      | -0.13 | 7.94  | -2.06 | 0.04463 |
| SAMD1      | 0.23  | 8.57  | 2.06  | 0.04466 |
| NAPA-AS1   | 0.20  | 5.60  | 2.06  | 0.04466 |
| RMND5A     | -0.18 | 9.33  | -2.06 | 0.04467 |
| SERPINH1   | 0.18  | 7.38  | 2.06  | 0.04470 |
| COG3       | -0.18 | 7.47  | -2.06 | 0.04474 |
| CYSLTR2    | -0.28 | 6.45  | -2.06 | 0.04476 |
| SLC3A2     | 0.15  | 10.53 | 2.06  | 0.04483 |
| LBH        | 0.19  | 12.00 | 2.06  | 0.04484 |
| LDLOC1     | 0.25  | 7.15  | 2.06  | 0.04488 |
| SFMBT2     | -0.25 | 7.66  | -2.06 | 0.04493 |
| UROD       | 0.15  | 9.34  | 2.05  | 0.04496 |
| PLBD1-AS1  | -0.28 | 5.98  | -2.05 | 0.04501 |
| ZSCAN25    | -0.14 | 7.75  | -2.05 | 0.04502 |
| AMY2B      | -0.29 | 6.96  | -2.05 | 0.04503 |
| THRA       | 0.17  | 9.30  | 2.05  | 0.04512 |
| RCHY1      | -0.18 | 7.07  | -2.05 | 0.04513 |
| HTATSF1P2  | -0.47 | 5.25  | -2.05 | 0.04514 |
| ABCB9      | 0.25  | 5.82  | 2.05  | 0.04517 |
| MTMR14     | 0.14  | 10.93 | 2.05  | 0.04520 |
| VRK3       | 0.15  | 10.54 | 2.05  | 0.04526 |
| NINJ2      | 0.30  | 8.82  | 2.05  | 0.04530 |

|            |       |       |       |         |
|------------|-------|-------|-------|---------|
| PMM2       | -0.20 | 6.72  | -2.05 | 0.04531 |
| AL356273.6 | 0.39  | 6.88  | 2.05  | 0.04532 |
| KLHDC3     | 0.14  | 10.11 | 2.05  | 0.04534 |
| SIGLEC1    | -0.69 | 7.68  | -2.05 | 0.04535 |
| STOML2     | 0.17  | 9.36  | 2.05  | 0.04536 |
| PIGU       | 0.18  | 7.79  | 2.05  | 0.04545 |
| MORF4L2    | -0.11 | 8.65  | -2.05 | 0.04547 |
| EIF4EBP1   | 0.26  | 8.59  | 2.05  | 0.04550 |
| PRDX5      | 0.27  | 11.12 | 2.05  | 0.04551 |
| NUDCD3     | 0.12  | 9.97  | 2.05  | 0.04558 |
| PSMD9      | 0.17  | 7.11  | 2.05  | 0.04560 |
| LINC01176  | -0.26 | 5.74  | -2.05 | 0.04560 |
| METTTL14   | -0.18 | 7.21  | -2.05 | 0.04568 |
| ENPP4      | -0.24 | 6.31  | -2.05 | 0.04569 |
| AC005262.1 | 0.28  | 5.56  | 2.05  | 0.04569 |
| MCTS1      | 0.13  | 8.06  | 2.05  | 0.04570 |
| RECK       | -0.21 | 6.51  | -2.05 | 0.04572 |
| TMEM147    | 0.21  | 8.77  | 2.05  | 0.04577 |
| GOLGA4     | -0.15 | 8.82  | -2.05 | 0.04577 |
| HNRNPH2    | -0.22 | 9.44  | -2.05 | 0.04578 |
| PIANP      | 0.28  | 5.08  | 2.05  | 0.04580 |
| LRRC37A3   | -0.21 | 5.48  | -2.05 | 0.04585 |
| MYC        | 0.21  | 10.26 | 2.05  | 0.04586 |
| BLOC1S1    | 0.24  | 7.57  | 2.05  | 0.04586 |
| TTF1       | 0.23  | 8.54  | 2.05  | 0.04586 |
| SS18       | -0.13 | 8.43  | -2.05 | 0.04589 |
| CCND1      | 0.20  | 5.30  | 2.04  | 0.04601 |
| TRPM7      | -0.18 | 7.61  | -2.04 | 0.04601 |
| SMG1P7     | -0.22 | 6.00  | -2.04 | 0.04601 |
| METAP2     | 0.19  | 9.14  | 2.04  | 0.04603 |
| MAP2K4     | -0.20 | 8.46  | -2.04 | 0.04603 |
| RIT1       | -0.19 | 8.79  | -2.04 | 0.04604 |
| AC022762.2 | -0.26 | 5.26  | -2.04 | 0.04607 |
| ZNF436     | -0.16 | 6.62  | -2.04 | 0.04609 |
| SLC35B3    | -0.15 | 6.79  | -2.04 | 0.04611 |
| MEF2A      | -0.25 | 8.80  | -2.04 | 0.04618 |
| PTBP2      | -0.20 | 6.00  | -2.04 | 0.04619 |
| HERPUD2    | -0.14 | 9.26  | -2.04 | 0.04622 |
| AL355802.1 | 0.20  | 6.11  | 2.04  | 0.04625 |
| SMDT1      | 0.32  | 9.52  | 2.04  | 0.04629 |
| ARL4C      | 0.16  | 11.39 | 2.04  | 0.04634 |
| GNPTAB     | -0.18 | 8.74  | -2.04 | 0.04639 |
| CXCR5      | 0.27  | 9.48  | 2.04  | 0.04641 |
| TMED3      | 0.19  | 9.13  | 2.04  | 0.04644 |
| ZNF45      | -0.16 | 6.94  | -2.04 | 0.04645 |
| AC008813.1 | 0.22  | 5.62  | 2.04  | 0.04645 |
| COQ7       | -0.17 | 6.82  | -2.04 | 0.04648 |
| AC093495.1 | -0.40 | 6.66  | -2.04 | 0.04652 |
| PAF1       | 0.16  | 9.91  | 2.04  | 0.04655 |
| ARHGAP26   | -0.30 | 10.79 | -2.04 | 0.04655 |

|            |       |       |       |         |
|------------|-------|-------|-------|---------|
| SLC38A2    | -0.21 | 9.07  | -2.04 | 0.04657 |
| CDK19      | -0.19 | 8.21  | -2.04 | 0.04657 |
| SPTLC2     | -0.20 | 10.07 | -2.04 | 0.04662 |
| DSTYK      | 0.18  | 8.89  | 2.04  | 0.04662 |
| ATP7A      | -0.24 | 6.60  | -2.04 | 0.04664 |
| RCOR3      | -0.18 | 8.10  | -2.04 | 0.04666 |
| ANO6       | -0.23 | 8.52  | -2.04 | 0.04667 |
| HINT1      | 0.21  | 10.32 | 2.04  | 0.04668 |
| ZNF697     | -0.22 | 5.25  | -2.04 | 0.04669 |
| AC096733.3 | 0.23  | 5.17  | 2.04  | 0.04670 |
| MS4A14     | -0.30 | 7.06  | -2.04 | 0.04671 |
| GLE1       | -0.11 | 9.22  | -2.04 | 0.04672 |
| CHPF       | 0.25  | 7.15  | 2.04  | 0.04672 |
| PAIP2B     | 0.19  | 6.10  | 2.04  | 0.04674 |
| PSKH1      | 0.11  | 9.33  | 2.04  | 0.04676 |
| BTBD10     | -0.21 | 8.23  | -2.04 | 0.04677 |
| CDS2       | -0.12 | 10.19 | -2.04 | 0.04683 |
| TRBJ2-3    | 0.20  | 7.06  | 2.04  | 0.04686 |
| TMEM86B    | 0.35  | 7.74  | 2.04  | 0.04687 |
| MIR646HG   | -0.32 | 6.80  | -2.04 | 0.04687 |
| GPX1       | 0.35  | 12.60 | 2.04  | 0.04687 |
| WDR81      | 0.13  | 10.06 | 2.04  | 0.04690 |
| ZNF124     | -0.20 | 5.56  | -2.04 | 0.04695 |
| TIGD5      | 0.20  | 7.38  | 2.04  | 0.04697 |
| ZNF532     | -0.22 | 6.53  | -2.03 | 0.04700 |
| STARD3NL   | -0.16 | 7.71  | -2.03 | 0.04703 |
| PDGFD      | -0.26 | 5.91  | -2.03 | 0.04705 |
| PPP1R14B   | 0.23  | 8.30  | 2.03  | 0.04708 |
| ZNF607     | 0.17  | 6.42  | 2.03  | 0.04713 |
| DFFA       | 0.21  | 8.78  | 2.03  | 0.04715 |
| KIF2C      | 0.25  | 5.37  | 2.03  | 0.04715 |
| FYCO1      | -0.18 | 8.21  | -2.03 | 0.04718 |
| RAB15      | -0.30 | 6.12  | -2.03 | 0.04718 |
| PRAF2      | 0.19  | 8.17  | 2.03  | 0.04719 |
| DUSP23     | 0.22  | 8.57  | 2.03  | 0.04719 |
| MSL3       | -0.25 | 10.01 | -2.03 | 0.04720 |
| C1orf109   | -0.21 | 6.54  | -2.03 | 0.04721 |
| NUP43      | -0.14 | 7.84  | -2.03 | 0.04724 |
| NAA80      | 0.19  | 7.67  | 2.03  | 0.04725 |
| AC004865.2 | 0.18  | 6.26  | 2.03  | 0.04727 |
| NBPF14     | -0.23 | 8.48  | -2.03 | 0.04734 |
| OSBPL3     | -0.18 | 7.57  | -2.03 | 0.04735 |
| CCT8P1     | -0.22 | 6.51  | -2.03 | 0.04735 |
| SUPT5H     | 0.12  | 11.49 | 2.03  | 0.04736 |
| AC120053.1 | -0.19 | 5.20  | -2.03 | 0.04736 |
| RNPC3      | -0.22 | 6.76  | -2.03 | 0.04736 |
| GPR174     | -0.22 | 7.57  | -2.03 | 0.04736 |
| CAVIN2     | -0.33 | 9.47  | -2.03 | 0.04738 |
| ZNF653     | 0.19  | 7.12  | 2.03  | 0.04738 |
| HUWE1      | -0.13 | 11.28 | -2.03 | 0.04739 |

|              |       |       |       |         |
|--------------|-------|-------|-------|---------|
| KRBA1        | 0.20  | 7.38  | 2.03  | 0.04746 |
| TRGV4        | -0.34 | 5.14  | -2.03 | 0.04748 |
| CD99         | 0.21  | 11.83 | 2.03  | 0.04751 |
| IL1R1        | -0.42 | 7.24  | -2.03 | 0.04751 |
| INSIG2       | -0.15 | 7.03  | -2.03 | 0.04751 |
| TNFRSF4      | 0.27  | 6.19  | 2.03  | 0.04751 |
| SBF2         | -0.25 | 7.77  | -2.03 | 0.04753 |
| CASP3        | -0.15 | 8.24  | -2.03 | 0.04758 |
| ZNF606       | -0.23 | 6.43  | -2.03 | 0.04760 |
| SMURF2       | -0.14 | 7.75  | -2.03 | 0.04763 |
| APBA2        | 0.22  | 8.91  | 2.03  | 0.04763 |
| RPL6         | 0.20  | 13.99 | 2.03  | 0.04766 |
| UVSSA        | -0.32 | 7.97  | -2.03 | 0.04770 |
| MBOAT1       | -0.18 | 8.61  | -2.03 | 0.04777 |
| C16orf86     | 0.21  | 6.23  | 2.03  | 0.04777 |
| EML3         | 0.14  | 10.77 | 2.03  | 0.04779 |
| CAPN2        | -0.16 | 11.12 | -2.03 | 0.04779 |
| EPB41L4A-AS1 | 0.18  | 7.96  | 2.03  | 0.04781 |
| LILRA4       | 0.41  | 7.33  | 2.03  | 0.04783 |
| RANGAP1      | 0.14  | 10.72 | 2.03  | 0.04785 |
| PROC         | 0.27  | 5.27  | 2.03  | 0.04786 |
| TADA3        | 0.14  | 10.94 | 2.03  | 0.04787 |
| CSTF1        | 0.11  | 8.72  | 2.03  | 0.04788 |
| ALDH1A1      | -0.26 | 8.01  | -2.03 | 0.04791 |
| MBLAC1       | 0.21  | 5.15  | 2.03  | 0.04794 |
| GNA13        | -0.23 | 9.44  | -2.03 | 0.04796 |
| GPR141       | -0.38 | 6.10  | -2.03 | 0.04796 |
| PPP1R37      | 0.17  | 7.91  | 2.03  | 0.04798 |
| ZNF511       | 0.18  | 7.36  | 2.03  | 0.04798 |
| UVRAG        | -0.14 | 8.62  | -2.03 | 0.04798 |
| RAB1A        | -0.18 | 9.33  | -2.03 | 0.04801 |
| PDSS1        | -0.22 | 5.68  | -2.02 | 0.04812 |
| ANXA4        | -0.15 | 8.45  | -2.02 | 0.04814 |
| VPS37B       | 0.18  | 10.00 | 2.02  | 0.04816 |
| RSL1D1       | 0.16  | 10.94 | 2.02  | 0.04819 |
| EIF1         | 0.16  | 13.11 | 2.02  | 0.04819 |
| NAGLU        | 0.16  | 8.44  | 2.02  | 0.04826 |
| SERPINB8     | -0.18 | 7.80  | -2.02 | 0.04828 |
| THRAP3       | -0.11 | 10.69 | -2.02 | 0.04829 |
| ZCCHC10      | -0.14 | 6.88  | -2.02 | 0.04832 |
| DHRS3        | 0.22  | 9.17  | 2.02  | 0.04835 |
| DMAP1        | 0.15  | 9.81  | 2.02  | 0.04837 |
| GOLGA7       | -0.16 | 9.53  | -2.02 | 0.04838 |
| MRPL52       | 0.18  | 8.70  | 2.02  | 0.04839 |
| TRBV7-6      | 0.24  | 6.70  | 2.02  | 0.04839 |
| PDZD8        | -0.27 | 7.63  | -2.02 | 0.04847 |
| AP001086.1   | 0.24  | 5.16  | 2.02  | 0.04848 |
| PI4K2A       | 0.14  | 8.33  | 2.02  | 0.04849 |
| AC004884.1   | 0.23  | 5.82  | 2.02  | 0.04849 |
| SNAI3        | 0.19  | 8.21  | 2.02  | 0.04853 |

|            |       |       |       |         |
|------------|-------|-------|-------|---------|
| ACADS      | 0.16  | 8.46  | 2.02  | 0.04855 |
| IRF1-AS1   | -0.24 | 8.25  | -2.02 | 0.04856 |
| SMCR8      | -0.13 | 10.16 | -2.02 | 0.04861 |
| ZNF239     | 0.21  | 5.52  | 2.02  | 0.04861 |
| RPS3AP49   | 0.22  | 5.50  | 2.02  | 0.04864 |
| CEP162     | -0.16 | 6.33  | -2.02 | 0.04865 |
| ARPP19     | -0.14 | 8.94  | -2.02 | 0.04871 |
| ID3        | 0.24  | 8.11  | 2.02  | 0.04872 |
| EXOC6      | -0.25 | 7.50  | -2.02 | 0.04872 |
| BACE2      | 0.25  | 7.13  | 2.02  | 0.04873 |
| C7orf26    | 0.13  | 9.64  | 2.02  | 0.04876 |
| PPP1R21    | -0.15 | 8.62  | -2.02 | 0.04877 |
| NAPEPLD    | -0.19 | 6.21  | -2.02 | 0.04880 |
| CCDC107    | 0.24  | 8.60  | 2.02  | 0.04881 |
| KDF1       | 0.23  | 5.73  | 2.02  | 0.04881 |
| LONP1      | 0.17  | 9.90  | 2.02  | 0.04890 |
| EVI5L      | 0.16  | 8.12  | 2.02  | 0.04898 |
| TRBV30     | 0.36  | 6.61  | 2.02  | 0.04904 |
| IL13RA1    | -0.30 | 9.99  | -2.02 | 0.04908 |
| ERCC1      | 0.15  | 9.68  | 2.02  | 0.04909 |
| MAP3K7CL   | -0.33 | 8.65  | -2.02 | 0.04909 |
| MRPL20-AS1 | 0.14  | 8.73  | 2.01  | 0.04913 |
| UBXN2A     | 0.18  | 7.00  | 2.01  | 0.04914 |
| KIF28P     | -0.33 | 6.05  | -2.01 | 0.04917 |
| TRBV28     | 0.47  | 6.94  | 2.01  | 0.04922 |
| HDDC3      | 0.16  | 8.46  | 2.01  | 0.04923 |
| C1orf112   | -0.17 | 5.78  | -2.01 | 0.04925 |
| IGLC3      | 0.50  | 10.64 | 2.01  | 0.04927 |
| PAK4       | 0.19  | 7.50  | 2.01  | 0.04931 |
| RPS7       | 0.20  | 12.65 | 2.01  | 0.04931 |
| AC138466.2 | -0.26 | 5.62  | -2.01 | 0.04931 |
| SLC25A13   | -0.17 | 6.43  | -2.01 | 0.04933 |
| SCYL1      | 0.14  | 10.55 | 2.01  | 0.04935 |
| CD58       | -0.24 | 7.49  | -2.01 | 0.04939 |
| XAF1       | -0.43 | 9.81  | -2.01 | 0.04941 |
| MCTP2      | -0.39 | 9.09  | -2.01 | 0.04943 |
| IFT140     | 0.16  | 6.78  | 2.01  | 0.04946 |
| CLDN7      | -0.25 | 5.43  | -2.01 | 0.04952 |
| MYCBP2     | -0.20 | 9.66  | -2.01 | 0.04954 |
| LAMP3      | -0.47 | 5.33  | -2.01 | 0.04955 |
| HP1BP3     | -0.20 | 10.01 | -2.01 | 0.04955 |
| CEP131     | 0.17  | 7.36  | 2.01  | 0.04959 |
| PDRG1      | 0.17  | 8.31  | 2.01  | 0.04962 |
| ZNF41      | -0.23 | 6.66  | -2.01 | 0.04970 |
| IFNGR1     | -0.25 | 10.63 | -2.01 | 0.04970 |
| L3MBTL4    | -0.22 | 5.13  | -2.01 | 0.04972 |
| TMEM204    | 0.27  | 9.07  | 2.01  | 0.04979 |
| BX255925.3 | 0.23  | 8.08  | 2.01  | 0.04981 |
| B4GALT3    | 0.15  | 10.21 | 2.01  | 0.04982 |
| RHOU       | -0.17 | 7.50  | -2.01 | 0.04986 |

|            |       |       |       |         |
|------------|-------|-------|-------|---------|
| FAM86B3P   | -0.27 | 5.29  | -2.01 | 0.04994 |
| AC012368.1 | -0.40 | 9.87  | -2.01 | 0.04997 |
| GAPDH      | 0.21  | 14.71 | 2.01  | 0.04998 |
| LAMTOR3    | -0.21 | 7.79  | -2.01 | 0.04999 |
| KLF4       | -0.22 | 8.47  | -2.01 | 0.05003 |
| TSPAN33    | 0.24  | 9.83  | 2.01  | 0.05011 |
| UBE2A      | -0.12 | 8.91  | -2.01 | 0.05011 |
| AC026979.2 | 0.27  | 5.97  | 2.01  | 0.05012 |
| RAB10      | -0.14 | 9.42  | -2.01 | 0.05013 |
| AP005431.2 | 0.21  | 5.84  | 2.01  | 0.05019 |
| FIZ1       | 0.15  | 7.89  | 2.01  | 0.05020 |
| SNHG19     | 0.25  | 6.19  | 2.01  | 0.05020 |
| NFIL3      | -0.31 | 9.27  | -2.00 | 0.05021 |
| CCDC149    | -0.21 | 7.65  | -2.00 | 0.05021 |
| SENP2      | -0.16 | 8.10  | -2.00 | 0.05022 |
| RGS1       | -0.24 | 5.31  | -2.00 | 0.05027 |
| ELK3       | -0.17 | 8.65  | -2.00 | 0.05031 |
| LINC01934  | 0.24  | 6.38  | 2.00  | 0.05037 |
| THEM6      | 0.19  | 7.50  | 2.00  | 0.05041 |
| UTP25      | -0.19 | 7.50  | -2.00 | 0.05051 |
| TAF5L      | -0.13 | 7.99  | -2.00 | 0.05056 |
| SLC25A43   | -0.20 | 6.37  | -2.00 | 0.05057 |
| ATPAF2     | 0.19  | 7.81  | 2.00  | 0.05062 |
| LRRC6      | -0.34 | 6.41  | -2.00 | 0.05068 |
| RENBP      | 0.18  | 9.10  | 2.00  | 0.05069 |
| CLEC2B     | -0.21 | 8.98  | -2.00 | 0.05072 |
| CNNM4      | -0.16 | 7.61  | -2.00 | 0.05079 |
| PHRF1      | 0.13  | 9.81  | 2.00  | 0.05080 |
| CPPED1     | -0.25 | 11.96 | -2.00 | 0.05080 |
| AC008677.2 | 0.29  | 8.36  | 2.00  | 0.05093 |
| CLEC12B    | -0.40 | 5.61  | -2.00 | 0.05093 |
| AC079140.2 | 0.36  | 6.86  | 2.00  | 0.05094 |
| MPZL2      | -0.27 | 6.15  | -2.00 | 0.05095 |
| ATXN7L3B   | -0.13 | 9.77  | -2.00 | 0.05095 |
| CPED1      | -0.22 | 5.61  | -2.00 | 0.05105 |
| CDK8       | -0.16 | 6.86  | -2.00 | 0.05105 |
| FAF1       | 0.15  | 8.59  | 2.00  | 0.05106 |
| RPL21P28   | 0.29  | 8.80  | 2.00  | 0.05109 |
| TRBV14     | 0.34  | 6.02  | 2.00  | 0.05117 |
| FUOM       | 0.24  | 7.07  | 2.00  | 0.05119 |
| RPL24P2    | 0.24  | 6.90  | 2.00  | 0.05120 |
| MTMR12     | -0.16 | 8.20  | -2.00 | 0.05121 |
| TRAK1      | -0.16 | 9.24  | -2.00 | 0.05123 |
| C14orf132  | 0.25  | 6.10  | 2.00  | 0.05125 |
| DESI2      | -0.12 | 7.74  | -2.00 | 0.05126 |
| USP1       | -0.16 | 8.00  | -2.00 | 0.05128 |
| KCNK6      | 0.26  | 9.64  | 1.99  | 0.05136 |
| SMIM4      | 0.21  | 6.83  | 1.99  | 0.05139 |
| KNSTRN     | -0.19 | 6.64  | -1.99 | 0.05141 |
| AL604028.1 | 0.23  | 5.38  | 1.99  | 0.05143 |



|            |       |       |       |         |
|------------|-------|-------|-------|---------|
| AP002381.2 | -0.27 | 6.73  | -1.99 | 0.05148 |
| MED31      | -0.18 | 6.81  | -1.99 | 0.05148 |
| BIRC2      | -0.19 | 8.69  | -1.99 | 0.05150 |
| DUSP12     | 0.15  | 7.31  | 1.99  | 0.05150 |
| COPB1      | -0.16 | 9.08  | -1.99 | 0.05158 |
| TNFRSF14   | 0.16  | 11.97 | 1.99  | 0.05169 |
| ABCF3      | 0.13  | 9.98  | 1.99  | 0.05178 |
| CTDSPL2    | -0.17 | 7.28  | -1.99 | 0.05183 |
| AACS       | 0.15  | 7.81  | 1.99  | 0.05184 |
| FAM110A    | 0.23  | 9.71  | 1.99  | 0.05186 |
| ATG3       | -0.16 | 9.89  | -1.99 | 0.05187 |
| BMP6       | -0.29 | 6.66  | -1.99 | 0.05193 |
| RALY       | 0.15  | 11.67 | 1.99  | 0.05195 |
| ANKEF1     | -0.21 | 5.69  | -1.99 | 0.05196 |
| ARL8B      | -0.14 | 8.57  | -1.99 | 0.05197 |
| MRPS5      | 0.13  | 9.14  | 1.99  | 0.05199 |
| PPAT       | -0.22 | 5.81  | -1.99 | 0.05207 |
| BAG4       | -0.15 | 6.96  | -1.99 | 0.05207 |
| ZNF621     | -0.16 | 7.34  | -1.99 | 0.05212 |
| HDAC9      | -0.27 | 6.51  | -1.99 | 0.05216 |
| SLBP       | -0.14 | 8.68  | -1.99 | 0.05218 |
| PPIL4      | -0.18 | 7.14  | -1.99 | 0.05219 |
| SLC35A5    | -0.18 | 7.21  | -1.99 | 0.05222 |
| ZBTB26     | -0.21 | 5.80  | -1.99 | 0.05228 |
| KNTC1      | -0.22 | 6.50  | -1.99 | 0.05232 |
| TLE4       | -0.19 | 10.20 | -1.99 | 0.05242 |
| ACSL1      | -0.47 | 12.03 | -1.99 | 0.05243 |
| QRICH1     | -0.12 | 9.84  | -1.99 | 0.05244 |
| SNHG25     | 0.33  | 6.47  | 1.98  | 0.05249 |
| TNRC6C     | 0.21  | 9.44  | 1.98  | 0.05250 |
| DARS1      | 0.24  | 9.11  | 1.98  | 0.05252 |
| MIEN1      | 0.17  | 9.26  | 1.98  | 0.05255 |
| CCDC7      | -0.20 | 5.36  | -1.98 | 0.05255 |
| NEK8       | 0.24  | 7.70  | 1.98  | 0.05263 |
| LRMP       | -0.18 | 10.11 | -1.98 | 0.05272 |
| NPC1       | -0.15 | 9.29  | -1.98 | 0.05277 |
| CPOX       | -0.20 | 6.68  | -1.98 | 0.05280 |
| SPRED2     | -0.23 | 5.49  | -1.98 | 0.05280 |
| SERPING1   | -0.58 | 8.50  | -1.98 | 0.05284 |
| PPP4R1     | -0.26 | 10.09 | -1.98 | 0.05284 |
| ARFGAP3    | -0.18 | 8.63  | -1.98 | 0.05287 |
| DLEU1      | 0.19  | 5.39  | 1.98  | 0.05292 |
| MORF4L1    | -0.12 | 10.75 | -1.98 | 0.05293 |
| ERN1       | -0.23 | 9.72  | -1.98 | 0.05302 |
| APEH       | 0.13  | 10.87 | 1.98  | 0.05303 |
| WWP1       | -0.21 | 7.91  | -1.98 | 0.05304 |
| TCF4       | 0.26  | 7.49  | 1.98  | 0.05306 |
| CASD1      | -0.23 | 6.43  | -1.98 | 0.05307 |
| CELF2      | -0.19 | 11.50 | -1.98 | 0.05308 |
| SCAMP2     | 0.14  | 11.54 | 1.98  | 0.05311 |

|            |       |       |       |         |
|------------|-------|-------|-------|---------|
| SUCLG2     | -0.19 | 8.22  | -1.98 | 0.05316 |
| STAT1      | -0.37 | 11.26 | -1.98 | 0.05317 |
| SSR1       | -0.14 | 10.01 | -1.98 | 0.05318 |
| ABCB1      | -0.18 | 7.47  | -1.98 | 0.05320 |
| KDM3B      | -0.20 | 10.32 | -1.98 | 0.05321 |
| SMIM15     | -0.16 | 7.05  | -1.98 | 0.05322 |
| GBP1       | -0.46 | 9.15  | -1.98 | 0.05324 |
| ZNF430     | 0.14  | 7.48  | 1.98  | 0.05327 |
| NLRC4      | -0.22 | 9.10  | -1.98 | 0.05330 |
| BANF1      | 0.23  | 10.25 | 1.98  | 0.05332 |
| INO80B     | 0.21  | 4.99  | 1.98  | 0.05333 |
| AC093012.1 | -0.18 | 9.42  | -1.98 | 0.05334 |
| CNN2P4     | -0.32 | 6.14  | -1.98 | 0.05336 |
| AC107956.1 | 0.25  | 6.77  | 1.98  | 0.05343 |
| AHCTF1     | -0.21 | 8.96  | -1.98 | 0.05343 |
| CREBZF     | -0.24 | 7.90  | -1.98 | 0.05345 |
| WDR76      | -0.17 | 6.23  | -1.98 | 0.05345 |
| RBM22      | -0.11 | 9.96  | -1.98 | 0.05348 |
| NTHL1      | 0.21  | 6.99  | 1.98  | 0.05350 |
| CLEC4A     | -0.20 | 5.94  | -1.98 | 0.05351 |
| PLEKHF2    | -0.20 | 7.83  | -1.98 | 0.05351 |
| ADD3       | -0.24 | 9.78  | -1.98 | 0.05358 |
| AIDA       | -0.20 | 7.18  | -1.98 | 0.05361 |
| LRIF1      | -0.17 | 7.19  | -1.98 | 0.05361 |
| RPL35P2    | 0.29  | 8.03  | 1.97  | 0.05366 |
| PUM1       | -0.17 | 9.24  | -1.97 | 0.05369 |
| AC021723.1 | 0.20  | 5.90  | 1.97  | 0.05371 |
| BRK1       | 0.16  | 10.64 | 1.97  | 0.05378 |
| C19orf47   | 0.16  | 7.94  | 1.97  | 0.05379 |
| PPBP       | 0.43  | 11.07 | 1.97  | 0.05382 |
| LGMN       | 0.21  | 6.91  | 1.97  | 0.05382 |
| HAL        | -0.36 | 9.44  | -1.97 | 0.05385 |
| PATZ1      | 0.13  | 9.45  | 1.97  | 0.05385 |
| HDGF       | 0.19  | 11.65 | 1.97  | 0.05387 |
| LZTS2      | 0.15  | 8.09  | 1.97  | 0.05388 |
| SPPL2B     | 0.20  | 8.75  | 1.97  | 0.05390 |
| PGLS       | 0.20  | 10.77 | 1.97  | 0.05394 |
| AC002558.1 | 0.26  | 5.22  | 1.97  | 0.05394 |
| PEX16      | 0.16  | 9.26  | 1.97  | 0.05394 |
| NUCB1      | 0.18  | 12.50 | 1.97  | 0.05395 |
| ZNF367     | -0.18 | 5.45  | -1.97 | 0.05399 |
| PHB2P1     | 0.17  | 5.07  | 1.97  | 0.05399 |
| VPS54      | -0.18 | 7.20  | -1.97 | 0.05401 |
| DPYSL2     | -0.18 | 9.68  | -1.97 | 0.05402 |
| RPSA       | 0.23  | 14.13 | 1.97  | 0.05407 |
| BTF3P9     | 0.18  | 5.51  | 1.97  | 0.05411 |
| NSMF       | 0.17  | 9.14  | 1.97  | 0.05415 |
| RANBP2     | -0.16 | 8.95  | -1.97 | 0.05419 |
| DOHH       | 0.20  | 6.57  | 1.97  | 0.05420 |
| SAMD14     | 0.44  | 6.46  | 1.97  | 0.05432 |

|            |       |       |       |         |
|------------|-------|-------|-------|---------|
| XPNPEP1    | -0.11 | 8.93  | -1.97 | 0.05437 |
| TOP2A      | 0.32  | 7.48  | 1.97  | 0.05439 |
| FER        | -0.16 | 5.90  | -1.97 | 0.05441 |
| RPS2P7     | 0.25  | 7.44  | 1.97  | 0.05444 |
| NEDD9      | -0.25 | 10.01 | -1.97 | 0.05445 |
| LRRK1      | -0.19 | 8.37  | -1.97 | 0.05451 |
| CD3D       | 0.26  | 11.24 | 1.97  | 0.05452 |
| TMEM177    | 0.18  | 6.15  | 1.97  | 0.05452 |
| RPL37P6    | 0.25  | 7.36  | 1.97  | 0.05452 |
| NUBPL      | -0.21 | 5.45  | -1.97 | 0.05455 |
| CD3EAP     | 0.19  | 6.11  | 1.97  | 0.05455 |
| AZIN1-AS1  | -0.26 | 6.50  | -1.97 | 0.05455 |
| AC105285.1 | -0.18 | 5.12  | -1.97 | 0.05455 |
| HSCB       | 0.18  | 6.66  | 1.97  | 0.05456 |
| IGHV3-15   | 0.44  | 7.27  | 1.97  | 0.05458 |
| NRDE2      | 0.16  | 8.79  | 1.97  | 0.05459 |
| AL122020.1 | 0.27  | 7.39  | 1.97  | 0.05459 |
| APOOL      | -0.18 | 6.16  | -1.97 | 0.05467 |
| SOWAHC     | -0.23 | 5.42  | -1.97 | 0.05468 |
| TMEM40     | 0.27  | 7.67  | 1.97  | 0.05469 |
| AC027575.3 | 0.21  | 5.24  | 1.97  | 0.05469 |
| TMEM81     | 0.18  | 6.31  | 1.97  | 0.05471 |
| EIF3F      | 0.18  | 11.92 | 1.97  | 0.05473 |
| STARD8     | -0.21 | 7.08  | -1.97 | 0.05474 |
| ENOX2      | -0.17 | 6.91  | -1.97 | 0.05477 |
| ZNF181     | -0.21 | 6.15  | -1.96 | 0.05480 |
| SERAC1     | -0.17 | 6.22  | -1.96 | 0.05482 |
| AC093014.1 | 0.22  | 5.33  | 1.96  | 0.05483 |
| SOCS6      | -0.16 | 5.45  | -1.96 | 0.05484 |
| FBXO10     | 0.23  | 6.26  | 1.96  | 0.05485 |
| RREB1      | -0.17 | 8.72  | -1.96 | 0.05487 |
| SLC43A1    | 0.16  | 7.86  | 1.96  | 0.05488 |
| ENDOV      | 0.18  | 7.19  | 1.96  | 0.05492 |
| ZNF570     | 0.20  | 6.44  | 1.96  | 0.05493 |
| AL080243.4 | 0.31  | 8.33  | 1.96  | 0.05494 |
| RPS13      | 0.19  | 12.50 | 1.96  | 0.05495 |
| IMP4       | 0.13  | 9.64  | 1.96  | 0.05501 |
| TFCP2      | -0.10 | 9.08  | -1.96 | 0.05503 |
| LEPROT     | -0.17 | 8.73  | -1.96 | 0.05503 |
| PDCD6      | -0.32 | 6.25  | -1.96 | 0.05505 |
| TRAC       | 0.26  | 12.95 | 1.96  | 0.05508 |
| DHX9       | -0.13 | 10.39 | -1.96 | 0.05510 |
| HSP90AB4P  | 0.24  | 5.31  | 1.96  | 0.05511 |
| RPL23AP65  | 0.27  | 7.70  | 1.96  | 0.05515 |
| PPFIA3     | 0.22  | 5.79  | 1.96  | 0.05515 |
| RAB33B     | -0.25 | 6.95  | -1.96 | 0.05516 |
| EIF5A      | 0.17  | 11.66 | 1.96  | 0.05543 |
| RPL21P3    | 0.32  | 6.86  | 1.96  | 0.05546 |
| ZNF500     | 0.17  | 7.89  | 1.96  | 0.05551 |
| MARF1      | -0.22 | 10.59 | -1.96 | 0.05553 |

|             |       |       |       |         |
|-------------|-------|-------|-------|---------|
| RUBCN       | -0.13 | 9.77  | -1.96 | 0.05557 |
| PTRH1       | 0.25  | 6.67  | 1.96  | 0.05563 |
| BIK         | 0.23  | 5.55  | 1.96  | 0.05564 |
| KEAP1       | 0.14  | 9.93  | 1.96  | 0.05567 |
| MIRLET7A1HG | -0.23 | 6.12  | -1.96 | 0.05567 |
| AP001496.2  | 0.16  | 5.07  | 1.96  | 0.05573 |
| RPL23AP74   | 0.21  | 7.00  | 1.96  | 0.05574 |
| ZBTB34      | -0.21 | 8.55  | -1.96 | 0.05577 |
| ZBTB17      | 0.13  | 9.46  | 1.96  | 0.05578 |
| PFN1        | 0.22  | 14.52 | 1.96  | 0.05581 |
| SMC5        | -0.16 | 7.48  | -1.96 | 0.05583 |
| PRCC        | 0.13  | 10.05 | 1.96  | 0.05588 |
| GK-IT1      | 0.42  | 6.05  | 1.96  | 0.05591 |
| ABHD13      | -0.18 | 7.16  | -1.96 | 0.05591 |
| ZC3H10      | 0.12  | 8.07  | 1.96  | 0.05592 |
| TMPO        | -0.19 | 8.49  | -1.96 | 0.05593 |
| BBS2        | -0.16 | 8.42  | -1.96 | 0.05596 |
| POT1        | -0.15 | 6.90  | -1.95 | 0.05600 |
| TRIM14      | -0.19 | 9.48  | -1.95 | 0.05601 |
| MAN2A1      | -0.17 | 8.06  | -1.95 | 0.05604 |
| KLHL22      | 0.12  | 9.01  | 1.95  | 0.05607 |
| RUNX2       | -0.23 | 8.08  | -1.95 | 0.05607 |
| RABGEF1     | 0.22  | 5.39  | 1.95  | 0.05610 |
| MGME1       | -0.16 | 7.73  | -1.95 | 0.05613 |
| IDE         | -0.16 | 7.30  | -1.95 | 0.05625 |
| ZNF350      | -0.13 | 7.83  | -1.95 | 0.05626 |
| LAPTM4A     | -0.14 | 10.14 | -1.95 | 0.05627 |
| BTF3        | 0.16  | 12.15 | 1.95  | 0.05633 |
| IKZF2       | -0.21 | 6.11  | -1.95 | 0.05634 |
| RPS27P14    | 0.19  | 5.07  | 1.95  | 0.05636 |
| CGRRF1      | -0.17 | 6.42  | -1.95 | 0.05638 |
| C11orf1     | 0.22  | 6.69  | 1.95  | 0.05640 |
| AC024075.1  | 0.27  | 5.76  | 1.95  | 0.05646 |
| GATM        | -0.28 | 5.45  | -1.95 | 0.05650 |
| CRTC2       | 0.13  | 10.90 | 1.95  | 0.05651 |
| AC034207.1  | 0.26  | 8.09  | 1.95  | 0.05654 |
| TIMP2       | -0.22 | 11.10 | -1.95 | 0.05661 |
| KIR2DS4     | 0.54  | 6.70  | 1.95  | 0.05662 |
| MRPL20      | 0.15  | 9.40  | 1.95  | 0.05672 |
| AL450405.1  | 0.45  | 9.44  | 1.95  | 0.05676 |
| HECW2       | -0.33 | 5.81  | -1.95 | 0.05681 |
| CYP1B1      | -0.33 | 7.81  | -1.95 | 0.05686 |
| LRFN3       | 0.22  | 7.83  | 1.95  | 0.05690 |
| TRBV5-1     | 0.30  | 8.01  | 1.95  | 0.05698 |
| MVK         | 0.19  | 7.28  | 1.95  | 0.05707 |
| MAP4K3-DT   | 0.19  | 5.25  | 1.95  | 0.05709 |
| RAB31       | -0.22 | 10.62 | -1.95 | 0.05714 |
| CEP128      | -0.20 | 5.72  | -1.95 | 0.05715 |
| AP000936.3  | 0.27  | 6.91  | 1.95  | 0.05716 |
| PDE12       | -0.17 | 7.13  | -1.95 | 0.05716 |

|            |       |       |       |         |
|------------|-------|-------|-------|---------|
| VEZT       | -0.17 | 7.11  | -1.95 | 0.05718 |
| TRAPPC2L   | 0.17  | 8.74  | 1.95  | 0.05719 |
| IGSF6      | -0.24 | 10.70 | -1.95 | 0.05720 |
| MYBBP1A    | 0.15  | 9.51  | 1.95  | 0.05720 |
| MEX3C      | -0.24 | 7.63  | -1.95 | 0.05720 |
| PLAAT4     | 0.22  | 10.97 | 1.94  | 0.05726 |
| ZFP41      | 0.17  | 6.83  | 1.94  | 0.05729 |
| NFATC2IP   | 0.17  | 10.01 | 1.94  | 0.05731 |
| TIGD7      | -0.18 | 5.84  | -1.94 | 0.05734 |
| BRD3OS     | 0.15  | 7.72  | 1.94  | 0.05741 |
| AL353662.2 | 0.18  | 5.69  | 1.94  | 0.05741 |
| ZFAS1      | 0.20  | 8.82  | 1.94  | 0.05747 |
| IFIT1      | -0.68 | 8.49  | -1.94 | 0.05754 |
| APP        | -0.20 | 9.99  | -1.94 | 0.05765 |
| POLK       | -0.17 | 6.68  | -1.94 | 0.05767 |
| CCT7       | 0.15  | 11.10 | 1.94  | 0.05770 |
| PBX2P1     | -0.30 | 6.48  | -1.94 | 0.05771 |
| PXK        | -0.24 | 8.45  | -1.94 | 0.05771 |
| H2BC19P    | -0.28 | 6.24  | -1.94 | 0.05783 |
| CISD3      | 0.23  | 8.38  | 1.94  | 0.05788 |
| ATP6AP2    | -0.14 | 9.80  | -1.94 | 0.05789 |
| ARID2      | -0.19 | 7.65  | -1.94 | 0.05790 |
| P3H3       | 0.20  | 5.67  | 1.94  | 0.05790 |
| RAP2A      | -0.19 | 7.20  | -1.94 | 0.05793 |
| MDM1       | -0.16 | 7.23  | -1.94 | 0.05796 |
| AL137127.1 | 0.20  | 5.23  | 1.94  | 0.05812 |
| TLR3       | -0.24 | 5.01  | -1.94 | 0.05818 |
| GOLGA7B    | 0.22  | 8.16  | 1.94  | 0.05822 |
| TSPYL4     | -0.17 | 7.04  | -1.94 | 0.05823 |
| DCTN3      | 0.17  | 9.50  | 1.94  | 0.05823 |
| MYO7A      | -0.23 | 6.53  | -1.94 | 0.05826 |
| F2RL3      | 0.26  | 5.91  | 1.94  | 0.05837 |
| HIGD2A     | 0.24  | 10.73 | 1.94  | 0.05839 |
| HAUS6      | -0.18 | 6.76  | -1.94 | 0.05839 |
| CDIPT      | 0.16  | 10.86 | 1.94  | 0.05843 |
| REL        | -0.17 | 6.72  | -1.94 | 0.05844 |
| AL359921.2 | 0.17  | 5.62  | 1.93  | 0.05850 |
| IWS1       | -0.10 | 9.51  | -1.93 | 0.05860 |
| GNG7       | 0.21  | 8.73  | 1.93  | 0.05865 |
| ABAT       | -0.19 | 8.46  | -1.93 | 0.05870 |
| DNPEP      | 0.17  | 9.63  | 1.93  | 0.05871 |
| CCNJ       | -0.17 | 5.95  | -1.93 | 0.05872 |
| EPSTI1     | -0.45 | 8.39  | -1.93 | 0.05873 |
| YES1P1     | 0.30  | 5.58  | 1.93  | 0.05880 |
| ARL5B      | -0.16 | 6.57  | -1.93 | 0.05881 |
| KEL        | 0.41  | 6.63  | 1.93  | 0.05886 |
| CNOT8      | -0.12 | 9.61  | -1.93 | 0.05890 |
| NEB        | -0.33 | 4.99  | -1.93 | 0.05890 |
| FAM241B    | 0.21  | 5.62  | 1.93  | 0.05893 |
| KBTBD4     | -0.12 | 8.38  | -1.93 | 0.05895 |

|                 |       |       |       |         |
|-----------------|-------|-------|-------|---------|
| ZBTB45          | 0.13  | 8.49  | 1.93  | 0.05901 |
| AL590762.3      | 0.19  | 5.18  | 1.93  | 0.05911 |
| FERMT3          | 0.17  | 12.62 | 1.93  | 0.05911 |
| ZMAT3           | 0.17  | 8.03  | 1.93  | 0.05914 |
| FAM234A         | 0.15  | 9.67  | 1.93  | 0.05920 |
| DRAM1           | -0.19 | 7.75  | -1.93 | 0.05924 |
| EMC8            | 0.15  | 8.48  | 1.93  | 0.05928 |
| SPPL2A          | -0.14 | 8.64  | -1.93 | 0.05934 |
| C21orf59-TCP10L | 0.29  | 5.33  | 1.93  | 0.05934 |
| BATF            | 0.21  | 9.05  | 1.93  | 0.05938 |
| AC092070.2      | -0.26 | 6.52  | -1.93 | 0.05940 |
| CARD6           | -0.22 | 7.67  | -1.93 | 0.05941 |
| RPS2P46         | 0.31  | 11.14 | 1.93  | 0.05945 |
| SMC1A           | -0.17 | 9.82  | -1.93 | 0.05946 |
| SIRT3           | 0.12  | 8.24  | 1.93  | 0.05953 |
| ARHGEF3         | -0.16 | 10.13 | -1.93 | 0.05956 |
| RABEP1          | -0.13 | 8.93  | -1.93 | 0.05960 |
| DOCK2           | -0.11 | 12.21 | -1.93 | 0.05967 |
| FRMD4B          | -0.24 | 6.92  | -1.93 | 0.05970 |
| MAP2K1          | -0.14 | 9.42  | -1.92 | 0.05975 |
| BCLAF3          | -0.19 | 7.10  | -1.92 | 0.05976 |
| LYL1            | 0.32  | 10.69 | 1.92  | 0.05980 |
| UBA52           | 0.28  | 14.77 | 1.92  | 0.05980 |
| ARMCX3          | -0.16 | 7.53  | -1.92 | 0.05987 |
| NUDT16P1        | -0.22 | 6.61  | -1.92 | 0.05988 |
| LINC00106       | -0.26 | 5.53  | -1.92 | 0.05993 |
| STK25           | 0.13  | 10.19 | 1.92  | 0.05996 |
| TBC1D23         | -0.19 | 7.41  | -1.92 | 0.05998 |
| SULF2           | -0.21 | 11.51 | -1.92 | 0.06000 |
| RABGGTA         | 0.14  | 9.53  | 1.92  | 0.06004 |
| IGBP1           | 0.12  | 10.51 | 1.92  | 0.06004 |
| DLEC1           | -0.24 | 6.57  | -1.92 | 0.06004 |
| GTPBP2          | -0.18 | 9.78  | -1.92 | 0.06008 |
| SEC23A          | -0.25 | 7.32  | -1.92 | 0.06009 |
| ZNF200          | -0.17 | 8.30  | -1.92 | 0.06013 |
| PADI2           | -0.40 | 11.34 | -1.92 | 0.06016 |
| AC004453.1      | 0.30  | 10.30 | 1.92  | 0.06027 |
| AC116353.6      | -0.21 | 5.89  | -1.92 | 0.06031 |
| TOM1            | 0.21  | 10.93 | 1.92  | 0.06037 |
| CASP1           | -0.19 | 11.14 | -1.92 | 0.06042 |
| SELENOW         | 0.19  | 9.97  | 1.92  | 0.06045 |
| AC245297.4      | 0.22  | 6.17  | 1.92  | 0.06046 |
| PLL             | 0.23  | 5.26  | 1.92  | 0.06047 |
| OTX1            | -0.37 | 5.97  | -1.92 | 0.06053 |
| PPP4R3A         | -0.12 | 9.47  | -1.92 | 0.06055 |
| RPL10P4         | 0.20  | 6.30  | 1.92  | 0.06056 |
| RPL23AP2        | 0.24  | 7.96  | 1.92  | 0.06058 |
| AC099336.2      | 0.31  | 9.46  | 1.92  | 0.06063 |
| CLSPN           | 0.23  | 5.58  | 1.92  | 0.06064 |
| AL365258.3      | 0.15  | 5.04  | 1.92  | 0.06064 |

|            |       |       |       |         |
|------------|-------|-------|-------|---------|
| PON2       | -0.16 | 6.27  | -1.92 | 0.06068 |
| CDC42P6    | -0.26 | 6.62  | -1.92 | 0.06074 |
| TRGC1      | -0.30 | 7.97  | -1.92 | 0.06075 |
| EIF5       | -0.13 | 10.38 | -1.92 | 0.06077 |
| INPP4A     | -0.16 | 9.93  | -1.92 | 0.06078 |
| MPEG1      | -0.20 | 12.31 | -1.92 | 0.06082 |
| AL139349.1 | -0.25 | 5.72  | -1.92 | 0.06084 |
| TBC1D25    | 0.14  | 9.36  | 1.92  | 0.06090 |
| ZNF345     | -0.19 | 5.42  | -1.92 | 0.06091 |
| SMYD5      | 0.19  | 8.62  | 1.92  | 0.06093 |
| NAB2       | 0.17  | 7.72  | 1.92  | 0.06096 |
| SLC25A36   | -0.17 | 7.17  | -1.91 | 0.06103 |
| NBPF12     | -0.20 | 7.61  | -1.91 | 0.06105 |
| MACROH2A2  | 0.16  | 6.50  | 1.91  | 0.06119 |
| TPRA1      | 0.14  | 9.07  | 1.91  | 0.06119 |
| FGFR2      | -0.29 | 5.08  | -1.91 | 0.06126 |
| IGLV3-21   | 0.53  | 8.00  | 1.91  | 0.06130 |
| SDR39U1    | 0.18  | 9.35  | 1.91  | 0.06130 |
| CCZ1B      | -0.29 | 7.39  | -1.91 | 0.06132 |
| CREB5      | -0.34 | 9.45  | -1.91 | 0.06134 |
| IGKV1-17   | 0.46  | 6.33  | 1.91  | 0.06137 |
| PYGO2      | 0.10  | 10.01 | 1.91  | 0.06148 |
| TBC1D10B   | 0.14  | 10.69 | 1.91  | 0.06149 |
| NKAP       | 0.15  | 8.42  | 1.91  | 0.06150 |
| RHOT1      | -0.18 | 8.15  | -1.91 | 0.06152 |
| FBXO3      | -0.15 | 7.79  | -1.91 | 0.06156 |
| MBIP       | -0.16 | 6.23  | -1.91 | 0.06157 |
| AC008555.7 | -0.17 | 5.38  | -1.91 | 0.06158 |
| PODXL2     | 0.25  | 6.01  | 1.91  | 0.06159 |
| ZNF749     | -0.18 | 5.70  | -1.91 | 0.06160 |
| DCAF4      | -0.19 | 7.20  | -1.91 | 0.06165 |
| TRBJ2-7    | 0.26  | 6.21  | 1.91  | 0.06166 |
| RPL12P42   | 0.18  | 5.28  | 1.91  | 0.06167 |
| NCAPG2     | -0.24 | 6.12  | -1.91 | 0.06172 |
| HSPG2      | 0.20  | 6.21  | 1.91  | 0.06172 |
| GSK3A      | 0.17  | 10.77 | 1.91  | 0.06174 |
| RNF169     | -0.14 | 8.65  | -1.91 | 0.06176 |
| SUMO3      | 0.12  | 10.00 | 1.91  | 0.06180 |
| CRY1       | -0.17 | 6.80  | -1.91 | 0.06181 |
| FZD1       | -0.23 | 6.88  | -1.91 | 0.06183 |
| EIF4A2     | -0.14 | 10.92 | -1.91 | 0.06184 |
| ROMO1      | 0.23  | 8.99  | 1.91  | 0.06189 |
| SCRN2      | 0.19  | 8.20  | 1.91  | 0.06189 |
| IL27RA     | 0.17  | 11.14 | 1.91  | 0.06190 |
| AC009120.1 | 0.30  | 5.53  | 1.91  | 0.06192 |
| CACFD1     | 0.20  | 6.63  | 1.91  | 0.06194 |
| SPEN       | -0.19 | 10.74 | -1.91 | 0.06197 |
| UFM1       | -0.16 | 7.56  | -1.91 | 0.06199 |
| LINC02328  | 0.17  | 5.79  | 1.91  | 0.06199 |
| KIF1B      | -0.25 | 8.49  | -1.91 | 0.06199 |

|            |       |       |       |         |
|------------|-------|-------|-------|---------|
| CTU2       | 0.18  | 7.09  | 1.91  | 0.06200 |
| RPL29P12   | 0.13  | 5.29  | 1.91  | 0.06204 |
| TARBP2     | 0.19  | 8.30  | 1.91  | 0.06207 |
| POLDIP2    | 0.11  | 9.65  | 1.91  | 0.06212 |
| ASAP1      | -0.25 | 9.39  | -1.91 | 0.06213 |
| UNC119B    | -0.15 | 8.47  | -1.91 | 0.06214 |
| AL031123.1 | -0.19 | 5.46  | -1.91 | 0.06221 |
| RAD23B     | -0.17 | 9.43  | -1.91 | 0.06221 |
| KLC2       | 0.18  | 8.12  | 1.91  | 0.06225 |
| SEC23B     | -0.12 | 9.36  | -1.91 | 0.06226 |
| TGFBR1     | -0.16 | 9.23  | -1.91 | 0.06226 |
| AC091153.1 | 0.21  | 6.80  | 1.91  | 0.06230 |
| HERC5      | -0.49 | 7.83  | -1.90 | 0.06237 |
| SMIM19     | 0.17  | 7.17  | 1.90  | 0.06241 |
| HPSE       | -0.21 | 8.38  | -1.90 | 0.06244 |
| AP1B1      | 0.14  | 11.21 | 1.90  | 0.06245 |
| NCAPD3     | -0.13 | 7.72  | -1.90 | 0.06246 |
| ZNF107     | -0.30 | 6.74  | -1.90 | 0.06250 |
| UCKL1      | 0.18  | 9.54  | 1.90  | 0.06252 |
| KDM4C      | -0.13 | 8.55  | -1.90 | 0.06260 |
| PRORP      | 0.18  | 5.90  | 1.90  | 0.06261 |
| ZBTB18     | -0.23 | 9.60  | -1.90 | 0.06261 |
| ANXA2R     | 0.17  | 8.92  | 1.90  | 0.06265 |
| NMT1       | 0.11  | 10.89 | 1.90  | 0.06267 |
| F5         | -0.29 | 9.07  | -1.90 | 0.06269 |
| MRPL37     | 0.18  | 9.07  | 1.90  | 0.06274 |
| AL590867.2 | 0.27  | 10.50 | 1.90  | 0.06276 |
| ACOT8      | 0.14  | 9.05  | 1.90  | 0.06276 |
| LINC02035  | -0.23 | 8.05  | -1.90 | 0.06280 |
| MAPRE2     | -0.10 | 9.69  | -1.90 | 0.06288 |
| FIBP       | 0.18  | 10.09 | 1.90  | 0.06291 |
| RPL22L1    | 0.19  | 7.41  | 1.90  | 0.06292 |
| EBP        | 0.21  | 8.00  | 1.90  | 0.06294 |
| SLC35C2    | 0.11  | 10.49 | 1.90  | 0.06298 |
| SDF4       | 0.13  | 11.33 | 1.90  | 0.06299 |
| AP3B1      | -0.13 | 8.50  | -1.90 | 0.06303 |
| AC131235.2 | 0.25  | 9.16  | 1.90  | 0.06303 |
| CXCR3      | 0.27  | 9.03  | 1.90  | 0.06308 |
| LARP4B     | -0.11 | 9.99  | -1.90 | 0.06308 |
| CITED4     | 0.26  | 6.26  | 1.90  | 0.06309 |
| AGAP1      | -0.24 | 6.95  | -1.90 | 0.06310 |
| RGS10      | 0.23  | 10.68 | 1.90  | 0.06312 |
| CLTB       | 0.17  | 9.80  | 1.90  | 0.06313 |
| POLR3H     | 0.15  | 8.72  | 1.90  | 0.06314 |
| SLCO4C1    | -0.29 | 6.45  | -1.90 | 0.06315 |
| PIK3R4     | -0.15 | 7.90  | -1.90 | 0.06315 |
| NFKBIL1    | 0.20  | 7.29  | 1.90  | 0.06319 |
| SART1      | 0.15  | 11.24 | 1.90  | 0.06321 |
| ENO1       | 0.17  | 13.24 | 1.90  | 0.06324 |
| TEX2       | -0.18 | 7.43  | -1.90 | 0.06327 |



|            |       |       |       |         |
|------------|-------|-------|-------|---------|
| NGLY1      | -0.14 | 8.26  | -1.90 | 0.06327 |
| COG8       | 0.17  | 8.53  | 1.90  | 0.06328 |
| PRSS57     | 0.31  | 5.51  | 1.90  | 0.06330 |
| MAP3K13    | 0.19  | 7.16  | 1.90  | 0.06331 |
| ATM        | -0.22 | 9.66  | -1.90 | 0.06332 |
| ACD        | 0.16  | 8.96  | 1.90  | 0.06335 |
| KLF12      | -0.17 | 8.15  | -1.90 | 0.06335 |
| EGLN1      | -0.30 | 7.27  | -1.90 | 0.06338 |
| ZNF426     | 0.14  | 7.44  | 1.90  | 0.06341 |
| GFOD2      | 0.16  | 8.60  | 1.90  | 0.06343 |
| FAH        | 0.18  | 8.01  | 1.90  | 0.06346 |
| MED1       | -0.16 | 8.67  | -1.90 | 0.06351 |
| MIR29B2CHG | -0.34 | 8.36  | -1.90 | 0.06357 |
| ZNHIT2     | 0.21  | 6.90  | 1.90  | 0.06358 |
| ITPRIP     | -0.22 | 10.59 | -1.90 | 0.06361 |
| DPYSL4     | 0.47  | 5.41  | 1.90  | 0.06362 |
| GPSM3      | 0.19  | 13.52 | 1.90  | 0.06364 |
| CYB561A3   | 0.20  | 11.02 | 1.89  | 0.06371 |
| FAM49A     | -0.16 | 9.57  | -1.89 | 0.06372 |
| EEFSEC     | 0.18  | 9.04  | 1.89  | 0.06376 |
| SPP1       | -0.38 | 5.29  | -1.89 | 0.06377 |
| TUBA1C     | 0.14  | 9.17  | 1.89  | 0.06377 |
| FXYP7      | 0.25  | 5.73  | 1.89  | 0.06384 |
| PIK3IP1    | 0.19  | 11.32 | 1.89  | 0.06384 |
| SMIM5      | 0.35  | 7.66  | 1.89  | 0.06386 |
| ZNF407     | -0.13 | 7.54  | -1.89 | 0.06387 |
| VKORC1     | 0.23  | 7.46  | 1.89  | 0.06388 |
| ELP5       | 0.15  | 8.77  | 1.89  | 0.06390 |
| AP000347.1 | 0.36  | 6.67  | 1.89  | 0.06396 |
| CREB3      | 0.19  | 8.54  | 1.89  | 0.06397 |
| FAM149B1   | -0.17 | 6.61  | -1.89 | 0.06398 |
| BBC3       | 0.23  | 8.69  | 1.89  | 0.06401 |
| SLAMF1     | 0.17  | 8.57  | 1.89  | 0.06403 |
| PLEKHA5    | -0.20 | 5.63  | -1.89 | 0.06406 |
| MAML1      | -0.19 | 9.72  | -1.89 | 0.06406 |
| RASSF5     | -0.15 | 11.91 | -1.89 | 0.06406 |
| PPP1R12C   | 0.16  | 10.74 | 1.89  | 0.06411 |
| CYC1       | 0.18  | 10.07 | 1.89  | 0.06414 |
| AL662795.2 | 0.16  | 7.06  | 1.89  | 0.06428 |
| RN7SL832P  | 0.24  | 5.18  | 1.89  | 0.06430 |
| FBR5       | 0.15  | 11.36 | 1.89  | 0.06438 |
| SMARCD2    | 0.11  | 11.02 | 1.89  | 0.06440 |
| TMEM260    | -0.19 | 7.86  | -1.89 | 0.06446 |
| ESPL1      | -0.21 | 5.21  | -1.89 | 0.06449 |
| MMADHC     | -0.14 | 8.82  | -1.89 | 0.06456 |
| TRAPPC1    | 0.18  | 10.96 | 1.89  | 0.06458 |
| ZCWPW1     | 0.18  | 7.00  | 1.89  | 0.06469 |
| MRM1       | 0.18  | 7.19  | 1.89  | 0.06473 |
| AL672207.1 | -0.29 | 5.25  | -1.89 | 0.06474 |
| RAB39B     | -0.16 | 6.22  | -1.89 | 0.06475 |

|            |       |       |       |         |
|------------|-------|-------|-------|---------|
| NAGS       | 0.18  | 5.99  | 1.89  | 0.06475 |
| ZNF394     | 0.11  | 9.57  | 1.89  | 0.06477 |
| AC055839.1 | 0.32  | 5.55  | 1.89  | 0.06484 |
| PCM1       | -0.14 | 9.37  | -1.89 | 0.06497 |
| AF001548.2 | 0.29  | 7.98  | 1.89  | 0.06500 |
| SEC61A1    | 0.12  | 11.52 | 1.89  | 0.06502 |
| SNX1       | -0.12 | 10.79 | -1.88 | 0.06511 |
| TTC1       | 0.12  | 9.41  | 1.88  | 0.06512 |
| ATP5MPL    | 0.17  | 9.53  | 1.88  | 0.06517 |
| AC016772.1 | -0.25 | 5.20  | -1.88 | 0.06517 |
| SLC66A2    | 0.18  | 10.02 | 1.88  | 0.06519 |
| ARFGAP2    | 0.11  | 11.11 | 1.88  | 0.06522 |
| CYB5R4     | -0.23 | 9.08  | -1.88 | 0.06522 |
| LINC00482  | -0.24 | 5.38  | -1.88 | 0.06522 |
| SELENOTP1  | -0.22 | 5.29  | -1.88 | 0.06527 |
| GPR65      | -0.15 | 8.91  | -1.88 | 0.06529 |
| SLC9A3R1   | 0.16  | 12.56 | 1.88  | 0.06530 |
| NDUFAF8    | 0.22  | 7.71  | 1.88  | 0.06530 |
| CRKL       | -0.12 | 9.96  | -1.88 | 0.06532 |
| ABCF1      | 0.15  | 10.74 | 1.88  | 0.06532 |
| MT-TH      | 0.40  | 6.31  | 1.88  | 0.06534 |
| LETMD1     | 0.10  | 9.27  | 1.88  | 0.06534 |
| AC091429.1 | 0.18  | 6.14  | 1.88  | 0.06535 |
| RANBP20P   | -0.33 | 6.47  | -1.88 | 0.06538 |
| HRH4       | -0.24 | 5.06  | -1.88 | 0.06539 |
| RASSF7     | 0.19  | 7.85  | 1.88  | 0.06549 |
| TFAP4      | 0.17  | 7.83  | 1.88  | 0.06550 |
| UQCC2      | 0.19  | 7.98  | 1.88  | 0.06551 |
| IFT22      | 0.21  | 5.85  | 1.88  | 0.06558 |
| IL21R      | 0.17  | 9.45  | 1.88  | 0.06564 |
| MBTD1      | -0.21 | 7.03  | -1.88 | 0.06564 |
| WDR46      | 0.14  | 9.63  | 1.88  | 0.06567 |
| AL139100.2 | 0.24  | 6.60  | 1.88  | 0.06572 |
| SOD2       | -0.32 | 13.25 | -1.88 | 0.06572 |
| NTAN1P2    | 0.18  | 5.05  | 1.88  | 0.06574 |
| SLC16A10   | 0.24  | 5.55  | 1.88  | 0.06578 |
| LOXL3      | -0.20 | 7.71  | -1.88 | 0.06579 |
| CXCR2      | -0.37 | 13.10 | -1.88 | 0.06588 |
| DYNC1LI2   | -0.15 | 8.39  | -1.88 | 0.06591 |
| TMEM184C   | -0.17 | 7.37  | -1.88 | 0.06604 |
| PXDC1      | -0.21 | 5.63  | -1.88 | 0.06613 |
| NLRC3      | -0.15 | 9.68  | -1.88 | 0.06616 |
| LGALS1     | -0.32 | 7.21  | -1.88 | 0.06617 |
| ANGEL2     | -0.14 | 7.27  | -1.88 | 0.06618 |
| RTN3P1     | -0.32 | 6.44  | -1.88 | 0.06619 |
| DUSP2      | 0.27  | 8.58  | 1.88  | 0.06620 |
| NACAP2     | 0.17  | 5.75  | 1.88  | 0.06632 |
| SCAT8      | -0.26 | 5.67  | -1.88 | 0.06633 |
| C1orf131   | -0.12 | 7.35  | -1.88 | 0.06641 |
| CTNNB1     | 0.16  | 9.73  | 1.88  | 0.06643 |

|            |       |       |       |         |
|------------|-------|-------|-------|---------|
| NID1       | -0.26 | 6.97  | -1.87 | 0.06644 |
| SLF2       | -0.14 | 7.76  | -1.87 | 0.06648 |
| LMNB1      | -0.31 | 9.40  | -1.87 | 0.06649 |
| EVI2B      | -0.20 | 11.71 | -1.87 | 0.06649 |
| WNT7A      | 0.25  | 6.41  | 1.87  | 0.06653 |
| ASB13      | 0.16  | 8.01  | 1.87  | 0.06654 |
| TNFRSF18   | 0.23  | 6.56  | 1.87  | 0.06658 |
| KIF22      | 0.14  | 9.75  | 1.87  | 0.06665 |
| MBD2       | -0.11 | 10.05 | -1.87 | 0.06666 |
| PLPP6      | -0.16 | 7.03  | -1.87 | 0.06668 |
| IRAK2      | -0.16 | 6.62  | -1.87 | 0.06671 |
| MACROH2A1  | -0.16 | 11.58 | -1.87 | 0.06672 |
| PAQR3      | -0.19 | 5.36  | -1.87 | 0.06672 |
| ZMYM3      | -0.14 | 8.71  | -1.87 | 0.06673 |
| IRAK3      | -0.37 | 8.94  | -1.87 | 0.06676 |
| DCTN4      | -0.19 | 8.07  | -1.87 | 0.06677 |
| CPNE5      | 0.25  | 9.15  | 1.87  | 0.06681 |
| POLR2A     | -0.16 | 11.96 | -1.87 | 0.06686 |
| SPTY2D1    | -0.14 | 8.19  | -1.87 | 0.06688 |
| ZSCAN32    | -0.14 | 7.89  | -1.87 | 0.06691 |
| TMX3       | -0.15 | 7.53  | -1.87 | 0.06692 |
| LYPD3      | 0.25  | 5.47  | 1.87  | 0.06695 |
| ZNF821     | 0.17  | 7.30  | 1.87  | 0.06699 |
| CFAP161    | 0.21  | 5.37  | 1.87  | 0.06703 |
| SPTBN5     | -0.26 | 6.04  | -1.87 | 0.06704 |
| FHDC1      | -0.36 | 5.67  | -1.87 | 0.06705 |
| PPP6R1     | 0.11  | 11.57 | 1.87  | 0.06712 |
| CARMIL2    | 0.22  | 9.88  | 1.87  | 0.06714 |
| RPL37AP1   | 0.32  | 9.07  | 1.87  | 0.06714 |
| RPL37P23   | 0.27  | 8.09  | 1.87  | 0.06714 |
| DTNB       | 0.15  | 7.53  | 1.87  | 0.06722 |
| HTR7P1     | -0.15 | 5.26  | -1.87 | 0.06722 |
| AKT2       | 0.11  | 11.45 | 1.87  | 0.06725 |
| AC139768.1 | 0.23  | 5.37  | 1.87  | 0.06728 |
| GPKOW      | 0.15  | 9.08  | 1.87  | 0.06729 |
| TRBV13     | 0.25  | 5.60  | 1.87  | 0.06729 |
| CD82       | 0.20  | 11.38 | 1.87  | 0.06730 |
| DCK        | -0.19 | 7.60  | -1.87 | 0.06731 |
| CASS4      | -0.26 | 8.88  | -1.87 | 0.06732 |
| IPCEF1     | -0.12 | 8.72  | -1.87 | 0.06733 |
| SDC3       | -0.29 | 6.55  | -1.87 | 0.06735 |
| SALL2      | 0.23  | 6.18  | 1.87  | 0.06737 |
| ABCB10     | -0.22 | 6.92  | -1.87 | 0.06737 |
| CD2        | 0.21  | 11.80 | 1.87  | 0.06739 |
| NUDC       | 0.17  | 9.96  | 1.87  | 0.06741 |
| TRIM11     | 0.11  | 9.51  | 1.87  | 0.06742 |
| CAAP1      | -0.19 | 6.48  | -1.87 | 0.06745 |
| HS3ST1     | 0.32  | 5.66  | 1.87  | 0.06759 |
| IKZF5      | -0.17 | 7.07  | -1.87 | 0.06760 |
| PTPRJ      | -0.21 | 11.82 | -1.87 | 0.06761 |

|            |       |       |       |         |
|------------|-------|-------|-------|---------|
| MFSD10     | 0.17  | 9.80  | 1.87  | 0.06766 |
| LCK        | 0.17  | 12.13 | 1.87  | 0.06767 |
| PPP1CC     | -0.14 | 9.49  | -1.87 | 0.06771 |
| TTC21B     | -0.16 | 6.83  | -1.87 | 0.06779 |
| POLR3GL    | 0.19  | 7.52  | 1.87  | 0.06782 |
| WAPL       | -0.12 | 9.16  | -1.87 | 0.06783 |
| TNIP2      | 0.12  | 9.68  | 1.86  | 0.06789 |
| IL17RA     | -0.22 | 12.46 | -1.86 | 0.06801 |
| PRPF18     | 0.17  | 6.30  | 1.86  | 0.06802 |
| MANF       | 0.17  | 9.23  | 1.86  | 0.06811 |
| MZT1       | -0.18 | 6.04  | -1.86 | 0.06813 |
| AC025181.2 | 0.23  | 5.59  | 1.86  | 0.06821 |
| SLC30A6    | -0.14 | 7.19  | -1.86 | 0.06823 |
| CYLD       | -0.13 | 10.51 | -1.86 | 0.06830 |
| CSNK1G3    | -0.14 | 6.90  | -1.86 | 0.06841 |
| ACOT13     | 0.14  | 6.92  | 1.86  | 0.06846 |
| DDIT4      | 0.24  | 9.39  | 1.86  | 0.06861 |
| NABP1      | -0.30 | 9.54  | -1.86 | 0.06866 |
| PPP1R12B   | -0.29 | 9.24  | -1.86 | 0.06866 |
| CASK       | -0.14 | 7.25  | -1.86 | 0.06868 |
| APLP2      | -0.16 | 12.84 | -1.86 | 0.06869 |
| AC133644.2 | 0.26  | 5.64  | 1.86  | 0.06872 |
| GPA33      | 0.23  | 7.32  | 1.86  | 0.06875 |
| AC005224.2 | 0.28  | 5.17  | 1.86  | 0.06875 |
| EMC6       | 0.16  | 7.82  | 1.86  | 0.06878 |
| AC096664.2 | 0.23  | 6.03  | 1.86  | 0.06887 |
| NAB1       | -0.19 | 7.23  | -1.86 | 0.06888 |
| P4HA1      | -0.15 | 7.40  | -1.86 | 0.06890 |
| MYLK       | -0.27 | 6.67  | -1.86 | 0.06890 |
| PRKDC      | -0.24 | 10.32 | -1.86 | 0.06891 |
| APPL2      | -0.16 | 8.50  | -1.86 | 0.06897 |
| IRAK1      | 0.12  | 10.81 | 1.86  | 0.06904 |
| BLK        | 0.33  | 9.04  | 1.86  | 0.06907 |
| STK35      | -0.17 | 8.89  | -1.86 | 0.06912 |
| MRM3       | 0.15  | 7.99  | 1.86  | 0.06922 |
| FAM83G     | 0.21  | 7.20  | 1.86  | 0.06924 |
| STX3       | -0.26 | 10.80 | -1.85 | 0.06931 |
| NDUFA6     | 0.17  | 9.08  | 1.85  | 0.06931 |
| YWHAZP2    | -0.26 | 5.74  | -1.85 | 0.06937 |
| MIIP       | 0.18  | 9.44  | 1.85  | 0.06942 |
| CCAR2      | 0.10  | 11.03 | 1.85  | 0.06944 |
| PRDM4      | -0.12 | 8.44  | -1.85 | 0.06951 |
| AC124016.3 | 0.18  | 5.05  | 1.85  | 0.06956 |
| GLS        | -0.17 | 8.81  | -1.85 | 0.06957 |
| AC015813.1 | -0.29 | 6.50  | -1.85 | 0.06958 |
| AL671277.2 | -0.22 | 5.19  | -1.85 | 0.06968 |
| CHKB-DT    | 0.24  | 5.75  | 1.85  | 0.06971 |
| NBPF25P    | -0.16 | 5.15  | -1.85 | 0.06978 |
| HLA-DPB2   | -0.30 | 5.34  | -1.85 | 0.06980 |
| FAAP100    | 0.15  | 9.26  | 1.85  | 0.06984 |

|            |       |       |       |         |
|------------|-------|-------|-------|---------|
| ZC3H13     | 0.20  | 10.00 | 1.85  | 0.06987 |
| PDE4DIP    | 0.15  | 8.24  | 1.85  | 0.06990 |
| UBL5       | 0.18  | 10.66 | 1.85  | 0.06998 |
| FDXR       | 0.20  | 6.95  | 1.85  | 0.07010 |
| USP3       | -0.12 | 10.20 | -1.85 | 0.07010 |
| ITPR1      | -0.22 | 8.05  | -1.85 | 0.07014 |
| AC005000.1 | -0.21 | 5.89  | -1.85 | 0.07015 |
| NDUFB10    | 0.18  | 9.96  | 1.85  | 0.07020 |
| AC002511.2 | -0.27 | 5.13  | -1.85 | 0.07023 |
| ZNF555     | -0.14 | 6.13  | -1.85 | 0.07024 |
| HLA-F-AS1  | -0.19 | 5.46  | -1.85 | 0.07030 |
| GPATCH4    | 0.20  | 8.16  | 1.85  | 0.07031 |
| PIWIL4     | -0.17 | 5.95  | -1.85 | 0.07033 |
| AC010099.1 | 0.21  | 5.67  | 1.85  | 0.07037 |
| SNRNP35    | 0.15  | 9.00  | 1.85  | 0.07037 |
| MED26      | 0.11  | 7.72  | 1.85  | 0.07038 |
| BEX2       | 0.23  | 7.02  | 1.85  | 0.07049 |
| ARNTL      | -0.17 | 8.65  | -1.85 | 0.07051 |
| ZFP91      | -0.15 | 8.27  | -1.85 | 0.07054 |
| WRAP53     | 0.16  | 8.24  | 1.85  | 0.07056 |
| ZNF234     | -0.15 | 6.36  | -1.85 | 0.07056 |
| SYNGR2     | 0.17  | 11.63 | 1.85  | 0.07062 |
| PPFIA1     | -0.19 | 8.90  | -1.85 | 0.07063 |
| GFI1B      | 0.25  | 9.01  | 1.85  | 0.07064 |
| TUFM       | 0.15  | 11.10 | 1.85  | 0.07064 |
| EML6       | -0.27 | 5.20  | -1.85 | 0.07065 |
| RPL3P12    | 0.20  | 5.56  | 1.85  | 0.07067 |
| TRBV6-4    | -0.24 | 5.19  | -1.85 | 0.07069 |
| AC135506.1 | 0.17  | 6.05  | 1.85  | 0.07070 |
| LINC00243  | 0.32  | 6.28  | 1.85  | 0.07071 |
| AC087284.1 | 0.33  | 5.73  | 1.85  | 0.07073 |
| TLCD3A     | -0.22 | 5.10  | -1.85 | 0.07076 |
| PBX3       | -0.14 | 7.22  | -1.84 | 0.07078 |
| SCAT1      | 0.22  | 4.97  | 1.84  | 0.07079 |
| RHOC       | 0.25  | 9.47  | 1.84  | 0.07080 |
| FAM214A    | -0.20 | 7.71  | -1.84 | 0.07089 |
| FAM114A2   | -0.14 | 7.17  | -1.84 | 0.07090 |
| SAR1A      | -0.11 | 9.71  | -1.84 | 0.07092 |
| NDUFC1     | 0.17  | 7.91  | 1.84  | 0.07094 |
| CEP170     | -0.27 | 6.64  | -1.84 | 0.07095 |
| RAP1A      | -0.15 | 9.88  | -1.84 | 0.07095 |
| ZNF222     | -0.15 | 5.75  | -1.84 | 0.07096 |
| NDOR1      | 0.16  | 8.77  | 1.84  | 0.07104 |
| LPCAT4     | 0.14  | 9.29  | 1.84  | 0.07109 |
| ZNF551     | -0.21 | 6.48  | -1.84 | 0.07110 |
| SLC9A7     | -0.24 | 6.84  | -1.84 | 0.07112 |
| LINC00476  | 0.26  | 6.89  | 1.84  | 0.07113 |
| AC090498.1 | 0.25  | 7.24  | 1.84  | 0.07121 |
| ZNF605     | -0.17 | 6.37  | -1.84 | 0.07122 |
| TSPO       | 0.26  | 10.96 | 1.84  | 0.07126 |

|            |       |       |       |         |
|------------|-------|-------|-------|---------|
| GPS1       | 0.15  | 10.40 | 1.84  | 0.07136 |
| AC095052.1 | 0.29  | 5.79  | 1.84  | 0.07137 |
| DCAF11     | 0.11  | 10.46 | 1.84  | 0.07140 |
| NCF2       | -0.22 | 13.33 | -1.84 | 0.07142 |
| AC132008.2 | -0.23 | 6.34  | -1.84 | 0.07146 |
| AC012354.2 | 0.21  | 5.98  | 1.84  | 0.07148 |
| VPS18      | 0.15  | 10.05 | 1.84  | 0.07149 |
| DCP2       | -0.15 | 9.47  | -1.84 | 0.07154 |
| GBP2       | -0.24 | 11.60 | -1.84 | 0.07161 |
| SDK2       | 0.30  | 6.43  | 1.84  | 0.07173 |
| RB1        | -0.19 | 7.53  | -1.84 | 0.07173 |
| WDR35      | -0.19 | 6.01  | -1.84 | 0.07177 |
| AL109741.1 | 0.23  | 5.12  | 1.84  | 0.07180 |
| RPS10P7    | 0.15  | 5.93  | 1.84  | 0.07181 |
| KATNB1     | 0.12  | 9.26  | 1.84  | 0.07184 |
| EPM2A      | -0.17 | 5.88  | -1.84 | 0.07185 |
| RUFY4      | -0.30 | 6.09  | -1.84 | 0.07187 |
| RPL21P39   | 0.24  | 7.39  | 1.84  | 0.07194 |
| AC009495.3 | -0.28 | 5.29  | -1.84 | 0.07196 |
| TUSC2      | 0.13  | 9.23  | 1.84  | 0.07201 |
| CRISPLD2   | -0.30 | 10.55 | -1.84 | 0.07205 |
| LMO2       | -0.19 | 9.57  | -1.84 | 0.07211 |
| WNK1       | -0.20 | 10.90 | -1.84 | 0.07225 |
| OTUD1      | -0.16 | 7.94  | -1.83 | 0.07229 |
| VRK2       | -0.16 | 6.80  | -1.83 | 0.07231 |
| SYS1       | 0.11  | 9.19  | 1.83  | 0.07234 |
| H2AJ       | 0.20  | 8.96  | 1.83  | 0.07240 |
| PNPLA6     | 0.13  | 11.21 | 1.83  | 0.07243 |
| PLEKHB2    | -0.14 | 10.43 | -1.83 | 0.07246 |
| UQCRH      | 0.18  | 10.08 | 1.83  | 0.07250 |
| AMOT       | -0.18 | 5.74  | -1.83 | 0.07255 |
| RTN1       | -0.26 | 8.29  | -1.83 | 0.07261 |
| ARHGEF19   | 0.18  | 7.47  | 1.83  | 0.07264 |
| UBA6       | -0.14 | 7.38  | -1.83 | 0.07267 |
| ABCB8      | 0.16  | 8.63  | 1.83  | 0.07267 |
| ARV1       | 0.13  | 6.46  | 1.83  | 0.07268 |
| GIHCG      | 0.16  | 5.96  | 1.83  | 0.07281 |
| RPP25L     | 0.17  | 8.65  | 1.83  | 0.07281 |
| CNOT1      | -0.09 | 11.23 | -1.83 | 0.07287 |
| GABPB1     | -0.14 | 7.17  | -1.83 | 0.07288 |
| TSN        | -0.11 | 8.98  | -1.83 | 0.07298 |
| TTL        | -0.12 | 7.93  | -1.83 | 0.07300 |
| DNAJA2     | -0.11 | 9.17  | -1.83 | 0.07300 |
| PDCD1      | 0.18  | 6.42  | 1.83  | 0.07301 |
| ADAM17     | -0.16 | 8.67  | -1.83 | 0.07307 |
| AC022144.1 | 0.25  | 4.97  | 1.83  | 0.07319 |
| PPP6C      | -0.11 | 9.45  | -1.83 | 0.07321 |
| MYCBP      | -0.12 | 7.90  | -1.83 | 0.07326 |
| CHD6       | -0.14 | 8.45  | -1.83 | 0.07330 |
| CCDC88C    | -0.13 | 10.77 | -1.83 | 0.07330 |

|            |       |       |       |         |
|------------|-------|-------|-------|---------|
| TMSB10     | 0.24  | 14.81 | 1.83  | 0.07334 |
| DYNLT1     | -0.20 | 9.78  | -1.83 | 0.07340 |
| ITGA3      | 0.18  | 6.84  | 1.83  | 0.07341 |
| THOC2      | 0.21  | 9.35  | 1.83  | 0.07343 |
| LSM4       | 0.18  | 9.57  | 1.83  | 0.07343 |
| NAP1L1     | 0.18  | 11.57 | 1.83  | 0.07345 |
| PACRGL     | -0.15 | 5.78  | -1.83 | 0.07349 |
| ZNF267     | -0.23 | 7.78  | -1.83 | 0.07351 |
| QTRT1      | 0.18  | 8.68  | 1.83  | 0.07354 |
| FEZ1       | 0.25  | 6.29  | 1.83  | 0.07359 |
| PNN        | -0.21 | 9.23  | -1.83 | 0.07364 |
| HSP90AB2P  | -0.13 | 5.01  | -1.83 | 0.07372 |
| AC122718.1 | 0.28  | 5.99  | 1.83  | 0.07374 |
| TRBV19     | 0.33  | 7.85  | 1.82  | 0.07380 |
| PSMB10     | 0.17  | 10.37 | 1.82  | 0.07387 |
| OCIAD1     | -0.10 | 9.26  | -1.82 | 0.07390 |
| PHAX       | 0.16  | 8.23  | 1.82  | 0.07394 |
| ZFP36L1    | -0.22 | 11.91 | -1.82 | 0.07395 |
| PBRM1      | -0.16 | 8.29  | -1.82 | 0.07395 |
| ILRUN      | 0.11  | 10.96 | 1.82  | 0.07402 |
| PCK2       | 0.16  | 8.96  | 1.82  | 0.07403 |
| AL133520.1 | 0.15  | 5.22  | 1.82  | 0.07410 |
| LRRC58     | 0.22  | 8.13  | 1.82  | 0.07422 |
| GRAMD1C    | -0.28 | 5.79  | -1.82 | 0.07426 |
| EXTL2      | -0.17 | 5.18  | -1.82 | 0.07430 |
| POLR2F     | 0.18  | 9.52  | 1.82  | 0.07430 |
| MCM9       | -0.15 | 7.51  | -1.82 | 0.07433 |
| SOC55      | -0.15 | 6.45  | -1.82 | 0.07437 |
| DEDD2      | 0.16  | 11.04 | 1.82  | 0.07438 |
| ELK4       | -0.18 | 8.23  | -1.82 | 0.07449 |
| ADPRH      | -0.18 | 7.60  | -1.82 | 0.07454 |
| ZMYM4      | -0.15 | 7.78  | -1.82 | 0.07461 |
| CORO1B     | 0.18  | 10.11 | 1.82  | 0.07462 |
| ACBD4      | 0.18  | 7.76  | 1.82  | 0.07467 |
| AC138951.1 | -0.29 | 5.22  | -1.82 | 0.07467 |
| BCL2L12    | 0.14  | 7.21  | 1.82  | 0.07472 |
| YTHDC1     | -0.11 | 9.76  | -1.82 | 0.07472 |
| FADD       | 0.15  | 9.66  | 1.82  | 0.07473 |
| PUS1       | 0.17  | 8.62  | 1.82  | 0.07476 |
| AC010894.5 | -0.26 | 6.50  | -1.82 | 0.07478 |
| CNTROB     | 0.12  | 8.76  | 1.82  | 0.07478 |
| HNRNPH1P3  | -0.21 | 5.58  | -1.82 | 0.07483 |
| Z83843.1   | -0.29 | 5.16  | -1.82 | 0.07486 |
| CCNL1      | -0.23 | 9.88  | -1.82 | 0.07490 |
| ZNF19      | 0.16  | 5.56  | 1.82  | 0.07490 |
| U40455.1   | 0.22  | 5.27  | 1.82  | 0.07494 |
| AKR1B1     | 0.16  | 10.06 | 1.82  | 0.07494 |
| PBXIP1     | 0.16  | 12.54 | 1.82  | 0.07507 |
| ARHGAP21   | -0.18 | 7.55  | -1.82 | 0.07508 |
| PDE3B      | -0.22 | 8.38  | -1.82 | 0.07509 |

|            |       |       |       |         |
|------------|-------|-------|-------|---------|
| RPL18P11   | 0.20  | 6.05  | 1.82  | 0.07512 |
| CMAHP      | -0.17 | 6.57  | -1.82 | 0.07513 |
| SMC3       | -0.15 | 8.52  | -1.82 | 0.07518 |
| OR52K3P    | -0.32 | 7.78  | -1.82 | 0.07518 |
| KCNJ15     | -0.37 | 10.92 | -1.82 | 0.07520 |
| TMEM144    | -0.21 | 5.52  | -1.82 | 0.07522 |
| STMN3      | 0.20  | 9.61  | 1.82  | 0.07524 |
| SMNDC1     | -0.15 | 7.93  | -1.82 | 0.07528 |
| MRPS11     | 0.15  | 8.70  | 1.82  | 0.07531 |
| NAMPT      | -0.37 | 12.36 | -1.81 | 0.07533 |
| GRHPR      | 0.19  | 9.39  | 1.81  | 0.07542 |
| NAMPTP1    | -0.42 | 9.07  | -1.81 | 0.07543 |
| TSR1       | 0.14  | 8.42  | 1.81  | 0.07547 |
| PRR5       | 0.22  | 8.92  | 1.81  | 0.07558 |
| SPATC1L    | 0.35  | 7.29  | 1.81  | 0.07572 |
| FAM135A    | -0.20 | 5.40  | -1.81 | 0.07577 |
| PDE4B      | -0.20 | 9.16  | -1.81 | 0.07579 |
| MRFAP1     | 0.12  | 11.35 | 1.81  | 0.07579 |
| STEAP4     | -0.39 | 10.37 | -1.81 | 0.07580 |
| CBY1       | 0.14  | 7.14  | 1.81  | 0.07584 |
| TNFAIP3    | -0.24 | 9.14  | -1.81 | 0.07589 |
| ZMAT5      | 0.15  | 8.55  | 1.81  | 0.07591 |
| TRMT1L     | -0.17 | 7.34  | -1.81 | 0.07594 |
| ANKRD35    | 0.24  | 5.09  | 1.81  | 0.07594 |
| GIT2       | -0.12 | 11.01 | -1.81 | 0.07596 |
| CINP       | 0.13  | 8.76  | 1.81  | 0.07597 |
| MT-TD      | 0.26  | 5.84  | 1.81  | 0.07598 |
| KHDC4      | -0.19 | 8.37  | -1.81 | 0.07599 |
| PWWP2B     | 0.19  | 7.99  | 1.81  | 0.07599 |
| H2BC20P    | -0.26 | 6.19  | -1.81 | 0.07607 |
| SNU13      | 0.17  | 10.55 | 1.81  | 0.07615 |
| ELP6       | 0.16  | 8.24  | 1.81  | 0.07618 |
| DFFB       | -0.14 | 7.09  | -1.81 | 0.07618 |
| TMEM245    | 0.20  | 8.45  | 1.81  | 0.07618 |
| AF131215.5 | -0.27 | 5.64  | -1.81 | 0.07622 |
| COMTD1     | 0.22  | 6.53  | 1.81  | 0.07624 |
| UBASH3A    | 0.21  | 9.24  | 1.81  | 0.07628 |
| OTUB1      | 0.14  | 10.94 | 1.81  | 0.07637 |
| MOGS       | 0.12  | 10.23 | 1.81  | 0.07641 |
| ARHGAP4    | 0.14  | 11.88 | 1.81  | 0.07642 |
| CSK        | 0.14  | 13.03 | 1.81  | 0.07643 |
| C1orf115   | 0.22  | 6.10  | 1.81  | 0.07656 |
| ZSCAN29    | -0.15 | 7.42  | -1.81 | 0.07657 |
| OGFOD3     | 0.15  | 8.75  | 1.81  | 0.07660 |
| GCLM       | 0.19  | 7.40  | 1.81  | 0.07661 |
| UBE2D3P1   | -0.24 | 6.63  | -1.81 | 0.07665 |
| EFL1       | -0.13 | 7.92  | -1.81 | 0.07670 |
| SHOC2      | -0.19 | 8.58  | -1.81 | 0.07680 |
| CNOT2      | 0.15  | 9.44  | 1.80  | 0.07693 |
| TMEM250    | 0.14  | 10.45 | 1.80  | 0.07698 |



|            |       |       |       |         |
|------------|-------|-------|-------|---------|
| AC004151.1 | 0.15  | 13.57 | 1.80  | 0.07701 |
| NEMF       | 0.22  | 9.27  | 1.80  | 0.07703 |
| SKAP1      | 0.16  | 9.45  | 1.80  | 0.07714 |
| MT-ND4L    | -0.23 | 12.08 | -1.80 | 0.07719 |
| NT5C3A     | -0.24 | 8.27  | -1.80 | 0.07724 |
| ATP5MC2    | 0.20  | 11.78 | 1.80  | 0.07732 |
| XRCC6      | 0.12  | 11.68 | 1.80  | 0.07735 |
| MRPS12     | 0.19  | 8.00  | 1.80  | 0.07736 |
| BAG5       | -0.12 | 8.42  | -1.80 | 0.07738 |
| PRPS2      | -0.15 | 7.46  | -1.80 | 0.07741 |
| FADS1      | -0.19 | 7.04  | -1.80 | 0.07747 |
| TRAV20     | -0.21 | 5.96  | -1.80 | 0.07748 |
| ARMC5      | 0.15  | 7.75  | 1.80  | 0.07749 |
| PBX2       | -0.19 | 11.10 | -1.80 | 0.07757 |
| RFXAP      | -0.17 | 5.55  | -1.80 | 0.07766 |
| PKD2       | -0.19 | 6.11  | -1.80 | 0.07769 |
| VAMP3      | -0.13 | 9.59  | -1.80 | 0.07779 |
| IGF2BP2    | 0.36  | 8.82  | 1.80  | 0.07783 |
| COX6C      | 0.19  | 9.04  | 1.80  | 0.07789 |
| AKR7A2     | 0.17  | 9.00  | 1.80  | 0.07801 |
| SULT1B1    | -0.36 | 8.08  | -1.80 | 0.07804 |
| ZNF761     | -0.19 | 6.42  | -1.80 | 0.07808 |
| EVL        | 0.16  | 12.77 | 1.80  | 0.07817 |
| FEM1B      | -0.14 | 8.35  | -1.80 | 0.07818 |
| SKP2       | -0.15 | 6.55  | -1.80 | 0.07818 |
| RPS15A     | 0.22  | 11.30 | 1.80  | 0.07819 |
| AC021092.2 | -0.16 | 6.23  | -1.80 | 0.07819 |
| AC090825.1 | -0.28 | 5.51  | -1.80 | 0.07822 |
| LRRC8B     | -0.19 | 6.43  | -1.80 | 0.07825 |
| CLDND1     | -0.16 | 8.00  | -1.80 | 0.07829 |
| BMPR2      | -0.18 | 7.05  | -1.80 | 0.07837 |
| NAGPA      | 0.17  | 9.26  | 1.80  | 0.07842 |
| FANCF      | -0.14 | 7.35  | -1.80 | 0.07847 |
| HDHD2      | 0.16  | 6.72  | 1.80  | 0.07849 |
| FBXO45     | -0.13 | 6.66  | -1.79 | 0.07856 |
| ATMIN      | -0.13 | 8.55  | -1.79 | 0.07857 |
| NDE1       | -0.17 | 10.20 | -1.79 | 0.07857 |
| ZFP3       | -0.17 | 6.18  | -1.79 | 0.07866 |
| RPS27L     | 0.17  | 8.10  | 1.79  | 0.07867 |
| ZNF600     | -0.18 | 7.78  | -1.79 | 0.07868 |
| AC027290.3 | 0.27  | 6.46  | 1.79  | 0.07877 |
| TMX4       | -0.20 | 9.86  | -1.79 | 0.07882 |
| C11orf21   | -0.16 | 10.47 | -1.79 | 0.07884 |
| OCIAD2     | 0.19  | 7.95  | 1.79  | 0.07888 |
| SRGAP3     | 0.17  | 5.66  | 1.79  | 0.07890 |
| CFAP97     | -0.21 | 6.78  | -1.79 | 0.07892 |
| SSH1       | -0.16 | 9.38  | -1.79 | 0.07899 |
| MAP7D1     | 0.14  | 12.08 | 1.79  | 0.07899 |
| RPRD1B     | -0.18 | 7.97  | -1.79 | 0.07900 |
| DIMT1      | -0.19 | 6.74  | -1.79 | 0.07906 |

|            |       |       |       |         |
|------------|-------|-------|-------|---------|
| IFI44      | -0.45 | 7.66  | -1.79 | 0.07909 |
| CXXC1      | 0.13  | 10.45 | 1.79  | 0.07910 |
| AC113404.3 | -0.32 | 6.28  | -1.79 | 0.07911 |
| CUL4B      | -0.13 | 8.89  | -1.79 | 0.07912 |
| NDUFA8     | 0.17  | 8.14  | 1.79  | 0.07915 |
| CLU        | 0.33  | 12.09 | 1.79  | 0.07917 |
| RPS6KB1    | -0.16 | 7.40  | -1.79 | 0.07920 |
| CACUL1     | -0.16 | 8.90  | -1.79 | 0.07924 |
| AP006222.1 | -0.31 | 6.13  | -1.79 | 0.07930 |
| BAX        | 0.16  | 10.53 | 1.79  | 0.07933 |
| MAML2      | -0.23 | 7.72  | -1.79 | 0.07934 |
| ADGRL1     | 0.17  | 8.50  | 1.79  | 0.07934 |
| AC140479.3 | -0.18 | 5.20  | -1.79 | 0.07935 |
| CRNKL1     | -0.13 | 8.89  | -1.79 | 0.07943 |
| WDR92      | 0.20  | 6.67  | 1.79  | 0.07946 |
| USPL1      | -0.15 | 7.96  | -1.79 | 0.07949 |
| POLR2J3    | 0.24  | 7.09  | 1.79  | 0.07956 |
| BATF2      | -0.47 | 6.98  | -1.79 | 0.07961 |
| RNASEK     | 0.17  | 6.78  | 1.79  | 0.07970 |
| RPS7P1     | 0.26  | 9.26  | 1.79  | 0.07971 |
| COMMD1     | 0.19  | 7.68  | 1.79  | 0.07976 |
| TTC14      | -0.24 | 7.82  | -1.79 | 0.07977 |
| RBM47      | -0.29 | 9.64  | -1.79 | 0.07978 |
| MMAB       | 0.17  | 7.43  | 1.79  | 0.07981 |
| NUP133     | -0.13 | 8.28  | -1.79 | 0.07984 |
| NIPBL      | -0.12 | 9.83  | -1.79 | 0.07985 |
| PAM        | -0.24 | 7.93  | -1.79 | 0.07986 |
| DLSTP1     | -0.19 | 5.29  | -1.79 | 0.07992 |
| RPL39L     | 0.22  | 5.45  | 1.79  | 0.08004 |
| JAM3       | 0.24  | 7.36  | 1.79  | 0.08007 |
| LCLAT1     | -0.19 | 5.76  | -1.79 | 0.08008 |
| OCEL1      | 0.17  | 8.19  | 1.78  | 0.08016 |
| TSC1       | -0.15 | 8.68  | -1.78 | 0.08021 |
| PFDN5      | 0.20  | 11.82 | 1.78  | 0.08022 |
| ACTL6A     | -0.14 | 7.46  | -1.78 | 0.08027 |
| ZNF408     | 0.15  | 8.39  | 1.78  | 0.08028 |
| EEF2KMT    | 0.14  | 7.32  | 1.78  | 0.08032 |
| FADS3      | 0.19  | 7.61  | 1.78  | 0.08032 |
| AP001273.1 | -0.17 | 5.08  | -1.78 | 0.08035 |
| GXYLT1     | -0.15 | 6.95  | -1.78 | 0.08038 |
| ZNF550     | -0.22 | 6.25  | -1.78 | 0.08039 |
| CBWD1      | -0.18 | 6.20  | -1.78 | 0.08041 |
| TMEM131    | -0.16 | 9.68  | -1.78 | 0.08043 |
| SHQ1       | -0.14 | 6.99  | -1.78 | 0.08046 |
| C4orf48    | 0.27  | 6.63  | 1.78  | 0.08065 |
| MAFK       | 0.14  | 8.90  | 1.78  | 0.08067 |
| JMJD6      | 0.14  | 9.29  | 1.78  | 0.08072 |
| ABRACL     | 0.16  | 8.84  | 1.78  | 0.08073 |
| EIF2S2     | 0.13  | 10.03 | 1.78  | 0.08073 |
| MED11      | 0.13  | 8.74  | 1.78  | 0.08080 |

|            |       |       |       |         |
|------------|-------|-------|-------|---------|
| ENTPD1     | -0.23 | 9.97  | -1.78 | 0.08088 |
| RNF8       | 0.15  | 7.85  | 1.78  | 0.08093 |
| CNPY4      | 0.15  | 8.26  | 1.78  | 0.08097 |
| NPEPPSP1   | -0.20 | 5.03  | -1.78 | 0.08101 |
| SMPD1      | 0.11  | 9.77  | 1.78  | 0.08106 |
| TRBV7-7    | 0.20  | 4.96  | 1.78  | 0.08106 |
| CLIP1      | -0.22 | 8.47  | -1.78 | 0.08110 |
| GEMIN6     | 0.17  | 7.53  | 1.78  | 0.08115 |
| MON2       | -0.21 | 7.53  | -1.78 | 0.08116 |
| PKM        | 0.15  | 13.50 | 1.78  | 0.08117 |
| TRBV7-4    | 0.25  | 5.52  | 1.78  | 0.08122 |
| NRGN       | 0.32  | 12.76 | 1.78  | 0.08126 |
| AL133260.1 | 0.21  | 7.17  | 1.78  | 0.08126 |
| PARP12     | -0.30 | 10.09 | -1.78 | 0.08131 |
| AC007298.2 | -0.31 | 6.91  | -1.78 | 0.08133 |
| RPL31P2    | 0.19  | 6.50  | 1.78  | 0.08134 |
| AHSA1      | 0.11  | 10.06 | 1.78  | 0.08134 |
| SELL       | -0.21 | 13.68 | -1.78 | 0.08135 |
| PCSK5      | -0.13 | 6.79  | -1.78 | 0.08137 |
| ZSCAN12    | -0.22 | 5.51  | -1.78 | 0.08140 |
| ERCC2      | 0.15  | 8.44  | 1.78  | 0.08147 |
| SLC25A24   | -0.21 | 6.66  | -1.78 | 0.08149 |
| CCDC86     | 0.14  | 7.88  | 1.78  | 0.08150 |
| AAMP       | 0.13  | 10.28 | 1.78  | 0.08164 |
| CFAP298    | 0.18  | 6.40  | 1.78  | 0.08166 |
| CR1        | -0.39 | 10.01 | -1.78 | 0.08167 |
| LINC01145  | -0.23 | 7.52  | -1.78 | 0.08174 |
| SREK1IP1   | 0.24  | 8.14  | 1.77  | 0.08182 |
| MARCHF2    | 0.23  | 10.82 | 1.77  | 0.08184 |
| NSMAF      | -0.14 | 8.91  | -1.77 | 0.08191 |
| PPID       | -0.11 | 8.54  | -1.77 | 0.08195 |
| AC112656.1 | -0.19 | 5.16  | -1.77 | 0.08197 |
| AL022311.1 | 0.22  | 5.81  | 1.77  | 0.08198 |
| BEST1      | -0.32 | 9.36  | -1.77 | 0.08202 |
| AC008026.1 | 0.22  | 6.62  | 1.77  | 0.08211 |
| RNF112     | -0.20 | 5.21  | -1.77 | 0.08213 |
| RRS1       | 0.20  | 7.04  | 1.77  | 0.08215 |
| HK2        | -0.23 | 9.25  | -1.77 | 0.08219 |
| RABEPK     | 0.13  | 8.27  | 1.77  | 0.08225 |
| AC090152.1 | -0.16 | 6.03  | -1.77 | 0.08226 |
| NAA38      | 0.22  | 9.41  | 1.77  | 0.08228 |
| GOLGA8B    | -0.34 | 7.94  | -1.77 | 0.08229 |
| PHBP19     | 0.25  | 5.16  | 1.77  | 0.08235 |
| UTP4       | 0.15  | 7.94  | 1.77  | 0.08237 |
| PPP1R14A   | 0.29  | 6.41  | 1.77  | 0.08238 |
| FUT7       | 0.21  | 8.72  | 1.77  | 0.08239 |
| LINC02432  | -0.33 | 6.43  | -1.77 | 0.08243 |
| RALY-AS1   | -0.17 | 5.36  | -1.77 | 0.08248 |
| NDUFS5     | 0.20  | 9.57  | 1.77  | 0.08261 |
| HSD17B4    | -0.12 | 8.54  | -1.77 | 0.08262 |

|            |       |       |       |         |
|------------|-------|-------|-------|---------|
| DTWD2      | -0.17 | 5.70  | -1.77 | 0.08265 |
| RALB       | -0.25 | 10.92 | -1.77 | 0.08266 |
| PFDN6      | 0.15  | 8.42  | 1.77  | 0.08273 |
| TIMM22     | 0.14  | 8.35  | 1.77  | 0.08280 |
| GAB2       | -0.27 | 10.88 | -1.77 | 0.08281 |
| CCHCR1     | 0.19  | 7.88  | 1.77  | 0.08284 |
| ENSA       | 0.12  | 10.64 | 1.77  | 0.08285 |
| TICAM1     | 0.15  | 8.46  | 1.77  | 0.08290 |
| CTTNBP2NL  | -0.24 | 5.25  | -1.77 | 0.08293 |
| KRT1       | 0.59  | 7.98  | 1.77  | 0.08297 |
| AC012236.1 | 0.27  | 5.17  | 1.77  | 0.08300 |
| NOS3       | 0.20  | 6.19  | 1.77  | 0.08305 |
| NOXA1      | 0.23  | 5.85  | 1.77  | 0.08314 |
| PNRC2      | -0.14 | 9.48  | -1.77 | 0.08334 |
| ITGB7      | 0.14  | 11.81 | 1.77  | 0.08339 |
| FBXL4      | -0.15 | 7.13  | -1.76 | 0.08347 |
| ACTR3P2    | -0.30 | 5.71  | -1.76 | 0.08349 |
| BRAF       | -0.17 | 7.98  | -1.76 | 0.08357 |
| MPZL3      | -0.25 | 9.37  | -1.76 | 0.08358 |
| AC026403.1 | 0.25  | 8.32  | 1.76  | 0.08364 |
| FAM86C2P   | 0.18  | 5.62  | 1.76  | 0.08374 |
| ARHGEF11   | -0.18 | 10.25 | -1.76 | 0.08379 |
| BTRC       | -0.13 | 7.49  | -1.76 | 0.08380 |
| FAM53C     | -0.21 | 10.55 | -1.76 | 0.08382 |
| DCUN1D5    | 0.14  | 6.61  | 1.76  | 0.08385 |
| HNRNPK     | -0.12 | 12.28 | -1.76 | 0.08390 |
| MARK4      | 0.14  | 9.10  | 1.76  | 0.08393 |
| RPGR       | -0.21 | 7.11  | -1.76 | 0.08399 |
| GOSR2      | -0.11 | 8.58  | -1.76 | 0.08400 |
| TMEM30A    | -0.16 | 9.62  | -1.76 | 0.08418 |
| EEF1B2P6   | 0.23  | 7.20  | 1.76  | 0.08418 |
| CREB1      | -0.14 | 8.73  | -1.76 | 0.08421 |
| PIK3C3     | -0.12 | 8.47  | -1.76 | 0.08423 |
| FAM227B    | -0.18 | 5.23  | -1.76 | 0.08424 |
| CTPS2      | -0.18 | 6.29  | -1.76 | 0.08427 |
| FUT8       | -0.19 | 6.91  | -1.76 | 0.08430 |
| DEF6       | 0.13  | 11.79 | 1.76  | 0.08441 |
| UBL3       | -0.16 | 8.40  | -1.76 | 0.08444 |
| KNOP1      | 0.20  | 7.90  | 1.76  | 0.08452 |
| CHMP7      | 0.14  | 10.53 | 1.76  | 0.08462 |
| MT-TT      | 0.29  | 6.05  | 1.76  | 0.08481 |
| IGFBP7     | 0.19  | 7.03  | 1.76  | 0.08482 |
| TMEM71     | -0.21 | 9.88  | -1.76 | 0.08483 |
| PSMC5      | 0.14  | 11.01 | 1.76  | 0.08489 |
| UBE3C      | -0.11 | 9.41  | -1.76 | 0.08490 |
| SLC47A1    | -0.23 | 5.06  | -1.76 | 0.08491 |
| N4BP2L1    | -0.12 | 7.67  | -1.76 | 0.08492 |
| FPR2       | -0.35 | 10.81 | -1.76 | 0.08503 |
| RPSAP18    | 0.18  | 5.82  | 1.76  | 0.08507 |
| KRT23      | -0.38 | 9.73  | -1.76 | 0.08509 |

|            |       |       |       |         |
|------------|-------|-------|-------|---------|
| SLC35A4    | 0.13  | 10.81 | 1.76  | 0.08510 |
| GRPEL1     | 0.11  | 8.66  | 1.75  | 0.08518 |
| SEL1L      | -0.18 | 8.61  | -1.75 | 0.08521 |
| ISOC2      | 0.22  | 7.63  | 1.75  | 0.08525 |
| SRRT       | 0.12  | 10.72 | 1.75  | 0.08528 |
| SEC13      | 0.13  | 10.17 | 1.75  | 0.08530 |
| TMEM189    | 0.13  | 8.36  | 1.75  | 0.08545 |
| AC132938.6 | -0.28 | 5.24  | -1.75 | 0.08546 |
| PMVK       | 0.19  | 9.24  | 1.75  | 0.08551 |
| YIPF4      | 0.20  | 9.76  | 1.75  | 0.08557 |
| LINC00877  | -0.22 | 7.75  | -1.75 | 0.08557 |
| ELOVL6     | -0.23 | 6.13  | -1.75 | 0.08563 |
| SELENOH    | 0.16  | 6.70  | 1.75  | 0.08563 |
| CETN2      | 0.15  | 7.49  | 1.75  | 0.08563 |
| NPM3       | 0.17  | 7.71  | 1.75  | 0.08568 |
| SIPA1      | 0.14  | 12.10 | 1.75  | 0.08574 |
| POLI       | -0.18 | 6.37  | -1.75 | 0.08583 |
| AKAP13     | -0.15 | 11.87 | -1.75 | 0.08589 |
| TRABD      | 0.14  | 10.88 | 1.75  | 0.08595 |
| YWHAZP3    | -0.29 | 5.89  | -1.75 | 0.08595 |
| FMN1       | -0.25 | 5.51  | -1.75 | 0.08596 |
| AL035587.1 | -0.18 | 6.73  | -1.75 | 0.08598 |
| DRAM2      | -0.11 | 8.66  | -1.75 | 0.08605 |
| FAM210A    | -0.16 | 6.26  | -1.75 | 0.08605 |
| AAR2       | 0.14  | 9.30  | 1.75  | 0.08616 |
| MFSD12     | 0.18  | 9.64  | 1.75  | 0.08616 |
| CTU1       | 0.18  | 6.64  | 1.75  | 0.08617 |
| MKLN1      | -0.13 | 8.51  | -1.75 | 0.08632 |
| AC092155.2 | 0.25  | 7.15  | 1.75  | 0.08637 |
| AC090559.1 | -0.15 | 10.30 | -1.75 | 0.08640 |
| MRPS21     | 0.16  | 9.55  | 1.75  | 0.08642 |
| LPIN2      | -0.21 | 10.51 | -1.75 | 0.08649 |
| TTC8       | -0.18 | 5.10  | -1.75 | 0.08650 |
| TTC17      | -0.10 | 9.13  | -1.75 | 0.08652 |
| B3GNT5     | -0.28 | 5.96  | -1.75 | 0.08653 |
| AC004585.1 | 0.19  | 6.40  | 1.75  | 0.08654 |
| AMN1       | -0.22 | 6.58  | -1.75 | 0.08654 |
| AC107954.1 | -0.26 | 5.55  | -1.75 | 0.08663 |
| CXorf40B   | 0.15  | 8.15  | 1.75  | 0.08666 |
| SEC62      | 0.29  | 11.04 | 1.75  | 0.08666 |
| AMMECR1L   | -0.11 | 7.89  | -1.75 | 0.08668 |
| OAT        | -0.16 | 8.07  | -1.75 | 0.08669 |
| AC011497.2 | -0.21 | 6.28  | -1.75 | 0.08674 |
| CHD3       | 0.13  | 11.90 | 1.75  | 0.08680 |
| EXOSC1     | 0.12  | 8.52  | 1.75  | 0.08687 |
| RPL22      | 0.14  | 10.48 | 1.75  | 0.08688 |
| NCOA4      | -0.26 | 12.05 | -1.75 | 0.08690 |
| LINC00909  | -0.14 | 7.28  | -1.74 | 0.08694 |
| HIBADH     | -0.14 | 6.87  | -1.74 | 0.08696 |
| ZFAND6     | -0.15 | 8.56  | -1.74 | 0.08709 |

|           |       |       |       |         |
|-----------|-------|-------|-------|---------|
| AKAP5     | -0.20 | 5.12  | -1.74 | 0.08711 |
| PRPF3     | -0.10 | 9.55  | -1.74 | 0.08711 |
| SIPA1L2   | -0.37 | 7.86  | -1.74 | 0.08717 |
| THAP6     | -0.12 | 6.83  | -1.74 | 0.08733 |
| AKAP10    | -0.16 | 8.65  | -1.74 | 0.08735 |
| TRBV7-9   | 0.31  | 7.91  | 1.74  | 0.08740 |
| COA3      | 0.21  | 9.07  | 1.74  | 0.08745 |
| FUBP1     | -0.12 | 9.36  | -1.74 | 0.08746 |
| BECN1     | -0.11 | 10.00 | -1.74 | 0.08748 |
| ZNF775    | 0.17  | 6.67  | 1.74  | 0.08752 |
| AHCYL1    | -0.11 | 9.43  | -1.74 | 0.08762 |
| PPP2R2A   | -0.12 | 8.94  | -1.74 | 0.08765 |
| CHID1     | 0.16  | 8.80  | 1.74  | 0.08768 |
| DCUN1D4   | -0.16 | 6.58  | -1.74 | 0.08774 |
| CCDC152   | 0.19  | 5.37  | 1.74  | 0.08775 |
| RPLP0P6   | 0.23  | 9.52  | 1.74  | 0.08777 |
| RPL13AP6  | 0.19  | 5.49  | 1.74  | 0.08777 |
| CREBBP    | -0.18 | 11.33 | -1.74 | 0.08783 |
| IKBKB     | -0.12 | 10.45 | -1.74 | 0.08785 |
| LINC02863 | -0.31 | 5.87  | -1.74 | 0.08795 |
| METTLL15  | 0.13  | 6.49  | 1.74  | 0.08798 |
| TRMT61A   | 0.18  | 7.48  | 1.74  | 0.08799 |
| ZNF702P   | -0.22 | 5.44  | -1.74 | 0.08810 |
| SSBP3     | 0.15  | 10.34 | 1.74  | 0.08810 |
| POLR2H    | 0.14  | 8.37  | 1.74  | 0.08810 |
| PHF8      | -0.13 | 9.16  | -1.74 | 0.08825 |
| ABT1      | 0.11  | 9.44  | 1.74  | 0.08826 |
| RPL18P13  | 0.24  | 7.30  | 1.74  | 0.08827 |
| SPRYD3    | 0.11  | 10.27 | 1.74  | 0.08842 |
| PPM1N     | 0.19  | 6.45  | 1.74  | 0.08849 |
| BIN2P1    | -0.23 | 6.81  | -1.74 | 0.08855 |
| B4GALT5   | -0.29 | 10.31 | -1.74 | 0.08856 |
| S100PBP   | -0.14 | 8.01  | -1.74 | 0.08866 |
| CLPTM1    | 0.11  | 10.76 | 1.74  | 0.08867 |
| GLIDR     | 0.20  | 5.07  | 1.73  | 0.08871 |
| CAPS      | 0.19  | 7.88  | 1.73  | 0.08872 |
| POU5F2    | 0.28  | 5.26  | 1.73  | 0.08877 |
| CCR10     | 0.22  | 5.61  | 1.73  | 0.08880 |
| RNF144B   | -0.19 | 8.57  | -1.73 | 0.08884 |
| NCOR1     | 0.16  | 11.19 | 1.73  | 0.08888 |
| CSF2RBP1  | -0.30 | 5.10  | -1.73 | 0.08889 |
| TAP1      | -0.20 | 12.48 | -1.73 | 0.08894 |
| MUC20-OT1 | 0.28  | 8.06  | 1.73  | 0.08895 |
| TRRAP     | -0.13 | 10.22 | -1.73 | 0.08896 |
| USP49     | -0.20 | 5.98  | -1.73 | 0.08897 |
| TFIP11    | 0.13  | 10.24 | 1.73  | 0.08903 |
| GPATCH2   | -0.15 | 6.17  | -1.73 | 0.08910 |
| P2RX5     | 0.27  | 8.84  | 1.73  | 0.08915 |
| ZNF594    | -0.17 | 5.56  | -1.73 | 0.08918 |
| LINC01355 | -0.28 | 5.16  | -1.73 | 0.08922 |

|             |       |       |       |         |
|-------------|-------|-------|-------|---------|
| UBE2F       | 0.18  | 7.77  | 1.73  | 0.08927 |
| CENPW       | 0.16  | 5.29  | 1.73  | 0.08930 |
| GIPC3       | 0.19  | 6.23  | 1.73  | 0.08945 |
| TMEM14A     | 0.15  | 5.84  | 1.73  | 0.08948 |
| KIAA1841    | -0.19 | 5.66  | -1.73 | 0.08949 |
| CTBP1       | 0.11  | 11.21 | 1.73  | 0.08950 |
| AC092145.1  | -0.31 | 6.62  | -1.73 | 0.08954 |
| GOLM1       | -0.21 | 7.43  | -1.73 | 0.08957 |
| PHF19       | 0.13  | 9.57  | 1.73  | 0.08959 |
| AGK         | -0.17 | 7.45  | -1.73 | 0.08962 |
| PAGE2B      | 0.29  | 5.41  | 1.73  | 0.08967 |
| DCTN2       | 0.12  | 10.48 | 1.73  | 0.08974 |
| CCDC159     | 0.17  | 9.68  | 1.73  | 0.08984 |
| NDUFAF4     | 0.20  | 6.70  | 1.73  | 0.08987 |
| AL109811.2  | -0.19 | 5.59  | -1.73 | 0.08992 |
| DTD1        | 0.14  | 7.30  | 1.73  | 0.08993 |
| RDH10       | -0.17 | 5.76  | -1.73 | 0.08999 |
| DLGAP4      | 0.10  | 10.09 | 1.73  | 0.09003 |
| CPVL        | -0.28 | 10.66 | -1.73 | 0.09009 |
| TSC22D4     | 0.15  | 11.48 | 1.73  | 0.09020 |
| CCDC97      | 0.09  | 10.04 | 1.73  | 0.09021 |
| KLRF1       | -0.25 | 7.92  | -1.73 | 0.09022 |
| SMURF1      | -0.12 | 8.58  | -1.73 | 0.09023 |
| NCR3        | 0.25  | 8.61  | 1.73  | 0.09028 |
| ANKRD20A11P | 0.40  | 5.38  | 1.73  | 0.09033 |
| ADAMTSL4    | -0.25 | 9.42  | -1.73 | 0.09042 |
| TCP11L2     | -0.28 | 7.89  | -1.73 | 0.09047 |
| APOBEC3A    | -0.34 | 11.68 | -1.72 | 0.09055 |
| MATK        | 0.24  | 10.05 | 1.72  | 0.09057 |
| ZNF133      | 0.12  | 7.63  | 1.72  | 0.09058 |
| RNF216P1    | 0.12  | 8.07  | 1.72  | 0.09066 |
| XPNPEP2     | 0.19  | 5.91  | 1.72  | 0.09074 |
| ZKSCAN3     | -0.13 | 6.08  | -1.72 | 0.09077 |
| PATL2       | -0.26 | 8.27  | -1.72 | 0.09079 |
| NR3C2       | -0.21 | 6.38  | -1.72 | 0.09083 |
| ITFG1       | -0.15 | 7.81  | -1.72 | 0.09086 |
| STX12       | -0.12 | 8.20  | -1.72 | 0.09088 |
| CA15P1      | -0.23 | 5.14  | -1.72 | 0.09094 |
| R3HDM2      | -0.10 | 8.51  | -1.72 | 0.09095 |
| FBXL8       | 0.18  | 6.23  | 1.72  | 0.09098 |
| FRMD4A      | 0.37  | 6.35  | 1.72  | 0.09099 |
| TM6SF1      | -0.23 | 7.35  | -1.72 | 0.09101 |
| RPL5        | 0.17  | 13.13 | 1.72  | 0.09106 |
| FAM222B     | 0.10  | 8.15  | 1.72  | 0.09106 |
| SUPT20H     | -0.16 | 9.38  | -1.72 | 0.09116 |
| CPSF7       | -0.15 | 10.48 | -1.72 | 0.09117 |
| NOP56       | 0.12  | 10.62 | 1.72  | 0.09122 |
| LANCL1      | -0.16 | 7.19  | -1.72 | 0.09124 |
| TNFRSF13B   | 0.29  | 6.86  | 1.72  | 0.09130 |
| TDP2        | -0.17 | 9.44  | -1.72 | 0.09130 |

|             |       |       |       |         |
|-------------|-------|-------|-------|---------|
| VAT1        | 0.15  | 9.67  | 1.72  | 0.09131 |
| TSR2        | 0.12  | 9.29  | 1.72  | 0.09132 |
| HERC2P2     | -0.31 | 7.11  | -1.72 | 0.09145 |
| TBC1D13     | 0.10  | 9.42  | 1.72  | 0.09157 |
| TREM1       | -0.30 | 11.47 | -1.72 | 0.09161 |
| GCA         | -0.34 | 11.28 | -1.72 | 0.09162 |
| RPP21       | -0.19 | 5.30  | -1.72 | 0.09163 |
| ADO         | -0.11 | 7.36  | -1.72 | 0.09173 |
| MACROD1     | 0.18  | 6.06  | 1.72  | 0.09173 |
| DNAJB4      | -0.18 | 5.27  | -1.72 | 0.09180 |
| CD68        | 0.33  | 6.82  | 1.72  | 0.09181 |
| ACBD3       | -0.15 | 7.53  | -1.72 | 0.09185 |
| USP46       | -0.17 | 5.92  | -1.72 | 0.09187 |
| FAM13A      | -0.22 | 7.27  | -1.72 | 0.09189 |
| GNA11       | 0.20  | 6.65  | 1.72  | 0.09190 |
| RPS2P5      | 0.23  | 11.22 | 1.72  | 0.09205 |
| ENTPD4      | -0.15 | 9.51  | -1.72 | 0.09208 |
| AK5         | 0.25  | 7.08  | 1.72  | 0.09213 |
| STRN        | -0.15 | 7.78  | -1.72 | 0.09217 |
| TFR2        | 0.22  | 6.76  | 1.72  | 0.09221 |
| ATOH8       | -0.43 | 6.05  | -1.72 | 0.09221 |
| RPL10AP6    | 0.26  | 9.55  | 1.72  | 0.09222 |
| NOP14       | 0.12  | 9.05  | 1.72  | 0.09223 |
| PAXIP1-AS2  | -0.16 | 6.81  | -1.72 | 0.09224 |
| NUB1        | -0.17 | 10.51 | -1.72 | 0.09229 |
| HEATR5A     | -0.19 | 6.97  | -1.71 | 0.09237 |
| DDX19B      | 0.14  | 8.54  | 1.71  | 0.09238 |
| LYSMD2      | -0.18 | 8.46  | -1.71 | 0.09239 |
| GSAP        | -0.19 | 8.19  | -1.71 | 0.09239 |
| PCBP4       | 0.17  | 8.24  | 1.71  | 0.09241 |
| AC002075.2  | 0.18  | 6.17  | 1.71  | 0.09245 |
| COX8A       | 0.22  | 9.83  | 1.71  | 0.09254 |
| CBWD5       | -0.20 | 5.94  | -1.71 | 0.09254 |
| UBE2E1      | -0.12 | 8.24  | -1.71 | 0.09270 |
| SGPL1       | -0.12 | 9.01  | -1.71 | 0.09277 |
| AP001816.1  | 0.20  | 6.57  | 1.71  | 0.09277 |
| EPS8        | -0.18 | 5.34  | -1.71 | 0.09284 |
| PDP1        | -0.17 | 7.38  | -1.71 | 0.09285 |
| WDR36       | -0.12 | 7.14  | -1.71 | 0.09287 |
| HMGXB4      | 0.15  | 7.77  | 1.71  | 0.09291 |
| PCNX1       | -0.21 | 10.11 | -1.71 | 0.09298 |
| TTC33       | -0.15 | 6.52  | -1.71 | 0.09302 |
| RNU6ATAC39P | 0.29  | 5.30  | 1.71  | 0.09308 |
| BCL11A      | 0.19  | 8.53  | 1.71  | 0.09314 |
| BIRC5       | 0.19  | 5.65  | 1.71  | 0.09322 |
| IGLC7       | 0.40  | 6.36  | 1.71  | 0.09329 |
| BOLA3-AS1   | 0.16  | 5.39  | 1.71  | 0.09332 |
| NOMO3       | -0.16 | 7.12  | -1.71 | 0.09333 |
| VPS26C      | -0.12 | 9.37  | -1.71 | 0.09334 |
| ZNF137P     | -0.16 | 5.13  | -1.71 | 0.09335 |



|            |       |       |       |         |
|------------|-------|-------|-------|---------|
| CD320      | 0.21  | 8.85  | 1.71  | 0.09338 |
| DYRK4      | 0.14  | 7.33  | 1.71  | 0.09339 |
| ISCA2      | 0.15  | 7.54  | 1.71  | 0.09341 |
| CDKN2AIP   | -0.16 | 7.50  | -1.71 | 0.09352 |
| GIMAP2     | -0.16 | 9.49  | -1.71 | 0.09355 |
| RPS18      | 0.20  | 13.85 | 1.71  | 0.09366 |
| CCDC82     | -0.19 | 7.18  | -1.71 | 0.09381 |
| DRG2       | 0.12  | 9.56  | 1.71  | 0.09382 |
| TOMM5      | 0.17  | 5.58  | 1.71  | 0.09397 |
| Z94721.3   | 0.40  | 6.43  | 1.71  | 0.09400 |
| AC106820.1 | 0.23  | 6.62  | 1.71  | 0.09402 |
| PNOC       | 0.24  | 7.34  | 1.71  | 0.09403 |
| TUT4       | -0.14 | 8.73  | -1.71 | 0.09408 |
| NOC2L      | 0.12  | 9.89  | 1.71  | 0.09408 |
| FKBP15     | -0.13 | 10.75 | -1.71 | 0.09408 |
| RN7SL600P  | 0.28  | 6.15  | 1.71  | 0.09410 |
| ARPC4      | 0.18  | 11.61 | 1.71  | 0.09415 |
| CCSAP      | -0.19 | 7.25  | -1.71 | 0.09415 |
| ZNF286B    | 0.15  | 5.42  | 1.71  | 0.09415 |
| LIPE       | 0.18  | 7.44  | 1.71  | 0.09416 |
| EIF2B4     | 0.11  | 8.87  | 1.71  | 0.09417 |
| EPB41L3    | -0.26 | 7.68  | -1.70 | 0.09420 |
| RTRAF      | 0.14  | 9.58  | 1.70  | 0.09422 |
| SOS1       | -0.18 | 7.89  | -1.70 | 0.09423 |
| GLT8D1     | -0.11 | 8.24  | -1.70 | 0.09434 |
| GNLY       | -0.34 | 13.23 | -1.70 | 0.09435 |
| CDK5       | 0.16  | 7.72  | 1.70  | 0.09437 |
| SHISA4     | 0.51  | 7.66  | 1.70  | 0.09439 |
| RRP7A      | 0.15  | 9.66  | 1.70  | 0.09440 |
| HECTD4     | -0.21 | 9.21  | -1.70 | 0.09447 |
| CHMP2B     | -0.15 | 7.61  | -1.70 | 0.09457 |
| MS4A4E     | -0.22 | 5.53  | -1.70 | 0.09463 |
| TMTC1      | -0.37 | 5.49  | -1.70 | 0.09465 |
| STX6       | -0.11 | 8.71  | -1.70 | 0.09467 |
| STRIP1     | -0.09 | 9.50  | -1.70 | 0.09474 |
| GNB5       | 0.14  | 8.85  | 1.70  | 0.09479 |
| GNPAT      | -0.10 | 8.61  | -1.70 | 0.09479 |
| LINC00662  | 0.27  | 7.54  | 1.70  | 0.09479 |
| LARP7      | 0.22  | 9.46  | 1.70  | 0.09491 |
| MIER1      | -0.17 | 8.26  | -1.70 | 0.09492 |
| CPD        | -0.33 | 9.67  | -1.70 | 0.09493 |
| AL096870.2 | 0.19  | 5.07  | 1.70  | 0.09511 |
| TEAD2      | 0.23  | 5.06  | 1.70  | 0.09513 |
| TLR2       | -0.28 | 10.76 | -1.70 | 0.09524 |
| PSMA1      | 0.14  | 7.06  | 1.70  | 0.09533 |
| TLR7       | -0.20 | 7.45  | -1.70 | 0.09535 |
| DSTNP2     | 0.14  | 5.97  | 1.70  | 0.09540 |
| BIVM       | -0.19 | 5.90  | -1.70 | 0.09540 |
| GLUD1      | -0.09 | 9.87  | -1.70 | 0.09552 |
| TMEM43     | -0.16 | 10.13 | -1.70 | 0.09552 |

|            |       |       |       |         |
|------------|-------|-------|-------|---------|
| IFITM3     | -0.60 | 12.11 | -1.70 | 0.09552 |
| RAB1B      | 0.14  | 12.00 | 1.70  | 0.09554 |
| POLR1D     | 0.13  | 10.05 | 1.70  | 0.09555 |
| ENOPH1     | -0.16 | 7.34  | -1.70 | 0.09557 |
| ANKS6      | 0.16  | 7.28  | 1.70  | 0.09559 |
| CREBRF     | -0.20 | 9.02  | -1.70 | 0.09560 |
| ATF2       | -0.16 | 7.63  | -1.70 | 0.09564 |
| ZNRD1      | 0.16  | 8.68  | 1.70  | 0.09572 |
| MT-TS2     | 0.35  | 6.73  | 1.70  | 0.09576 |
| PACS2      | 0.14  | 9.79  | 1.70  | 0.09589 |
| PKP4       | -0.15 | 7.74  | -1.70 | 0.09597 |
| FRG1       | 0.15  | 8.15  | 1.70  | 0.09599 |
| RPUSD2     | 0.15  | 7.56  | 1.70  | 0.09603 |
| SAP30BP    | 0.11  | 10.43 | 1.69  | 0.09611 |
| MAP3K1     | -0.19 | 9.49  | -1.69 | 0.09615 |
| AC016582.2 | -0.22 | 6.16  | -1.69 | 0.09621 |
| MOB1B      | -0.16 | 6.88  | -1.69 | 0.09622 |
| NIN        | -0.17 | 9.98  | -1.69 | 0.09626 |
| DAD1       | 0.12  | 10.05 | 1.69  | 0.09626 |
| NCDN       | 0.14  | 8.47  | 1.69  | 0.09630 |
| COMMD7     | 0.16  | 9.00  | 1.69  | 0.09633 |
| TAPBPL     | 0.15  | 10.24 | 1.69  | 0.09635 |
| TRIM52-AS1 | 0.21  | 7.59  | 1.69  | 0.09648 |
| KCTD15     | -0.17 | 7.55  | -1.69 | 0.09651 |
| RFX3       | -0.20 | 6.65  | -1.69 | 0.09653 |
| POMGNT2    | 0.13  | 7.39  | 1.69  | 0.09653 |
| UBALD2     | 0.20  | 11.68 | 1.69  | 0.09654 |
| HERC2      | -0.16 | 9.24  | -1.69 | 0.09666 |
| METTL2B    | 0.13  | 7.95  | 1.69  | 0.09674 |
| MTREX      | -0.13 | 8.16  | -1.69 | 0.09699 |
| MAN1A2     | 0.21  | 8.89  | 1.69  | 0.09707 |
| AL162151.2 | 0.24  | 7.17  | 1.69  | 0.09708 |
| NUP155     | -0.15 | 7.12  | -1.69 | 0.09710 |
| TMEM219    | 0.17  | 10.18 | 1.69  | 0.09711 |
| VMO1       | 0.38  | 6.05  | 1.69  | 0.09718 |
| LINC00674  | 0.17  | 5.41  | 1.69  | 0.09718 |
| AQP9       | -0.33 | 12.15 | -1.69 | 0.09727 |
| NTNG2      | -0.32 | 8.75  | -1.69 | 0.09728 |
| MBTPS1     | -0.10 | 9.85  | -1.69 | 0.09730 |
| WIPF1      | -0.16 | 12.15 | -1.69 | 0.09736 |
| AC009244.1 | 0.19  | 5.18  | 1.69  | 0.09739 |
| GPANK1     | 0.14  | 8.70  | 1.69  | 0.09741 |
| JRKL       | -0.20 | 5.96  | -1.69 | 0.09743 |
| INTS3      | -0.13 | 10.56 | -1.69 | 0.09745 |
| AC005014.1 | -0.23 | 5.80  | -1.69 | 0.09745 |
| AC080023.2 | -0.26 | 5.16  | -1.69 | 0.09745 |
| MINDY2     | 0.19  | 7.39  | 1.69  | 0.09748 |
| FDPS       | 0.10  | 9.86  | 1.69  | 0.09748 |
| FCGR2A     | -0.27 | 12.44 | -1.69 | 0.09752 |
| AC018816.1 | 0.18  | 5.03  | 1.69  | 0.09758 |

|            |       |       |       |         |
|------------|-------|-------|-------|---------|
| DOCK11P1   | -0.23 | 5.71  | -1.69 | 0.09760 |
| TRIM4      | -0.11 | 8.83  | -1.69 | 0.09765 |
| FCAR       | -0.33 | 7.55  | -1.69 | 0.09771 |
| PYCARD-AS1 | 0.15  | 5.45  | 1.69  | 0.09772 |
| E4F1       | 0.13  | 9.09  | 1.69  | 0.09783 |
| KHNYN      | -0.10 | 10.52 | -1.69 | 0.09793 |
| TSNAX      | -0.14 | 8.02  | -1.69 | 0.09798 |
| ARHGEF5    | 0.17  | 6.09  | 1.69  | 0.09801 |
| ID2        | -0.12 | 9.80  | -1.68 | 0.09808 |
| AC091825.3 | 0.19  | 5.66  | 1.68  | 0.09813 |
| PIK3CB     | -0.15 | 8.15  | -1.68 | 0.09815 |
| CEP120     | -0.20 | 7.27  | -1.68 | 0.09816 |
| PMPCB      | -0.09 | 8.94  | -1.68 | 0.09816 |
| AREL1      | -0.13 | 10.05 | -1.68 | 0.09833 |
| TNK1       | 0.20  | 6.03  | 1.68  | 0.09838 |
| SRGN       | -0.27 | 13.84 | -1.68 | 0.09842 |
| AFAP1L2    | -0.18 | 5.93  | -1.68 | 0.09851 |
| CDC14A     | -0.23 | 7.18  | -1.68 | 0.09853 |
| DNAJB1     | 0.11  | 10.89 | 1.68  | 0.09855 |
| ZCCHC8     | -0.15 | 8.16  | -1.68 | 0.09856 |
| AFG3L2     | 0.11  | 9.04  | 1.68  | 0.09858 |
| CD19       | 0.35  | 8.57  | 1.68  | 0.09868 |
| MORN1      | 0.17  | 5.64  | 1.68  | 0.09869 |
| EIF3J      | 0.30  | 9.00  | 1.68  | 0.09876 |
| HEATR3     | -0.14 | 7.30  | -1.68 | 0.09880 |
| RETREG1    | 0.21  | 7.27  | 1.68  | 0.09880 |
| TNFRSF13C  | 0.26  | 8.82  | 1.68  | 0.09881 |
| SETD6      | -0.14 | 6.30  | -1.68 | 0.09885 |
| RNF167     | 0.14  | 11.80 | 1.68  | 0.09899 |
| KCTD21     | -0.15 | 7.94  | -1.68 | 0.09900 |
| LMAN2      | 0.14  | 11.71 | 1.68  | 0.09900 |
| TMPPE      | -0.21 | 5.61  | -1.68 | 0.09910 |
| OXNAD1     | 0.19  | 8.24  | 1.68  | 0.09913 |
| B3GALNT2   | -0.17 | 6.82  | -1.68 | 0.09916 |
| UQCRB      | 0.15  | 10.67 | 1.68  | 0.09920 |
| TENT4A     | -0.13 | 8.44  | -1.68 | 0.09928 |
| VPS8       | -0.11 | 9.31  | -1.68 | 0.09930 |
| ZNF483     | -0.20 | 5.54  | -1.68 | 0.09935 |
| MGAM       | -0.41 | 10.76 | -1.68 | 0.09941 |
| F8A3       | 0.19  | 6.18  | 1.68  | 0.09941 |
| AL050331.1 | 0.26  | 8.26  | 1.68  | 0.09942 |
| RAB18      | -0.14 | 8.55  | -1.68 | 0.09950 |
| DRG1       | 0.14  | 8.73  | 1.68  | 0.09955 |
| YAF2       | 0.15  | 7.64  | 1.68  | 0.09964 |
| PPIAP31    | 0.18  | 5.97  | 1.68  | 0.09968 |
| SEC14L1    | -0.25 | 12.46 | -1.68 | 0.09969 |
| RSAD2      | -0.64 | 7.93  | -1.68 | 0.09969 |
| MPLKIP     | 0.13  | 7.15  | 1.68  | 0.09970 |
| NEIL2      | 0.15  | 7.71  | 1.68  | 0.09971 |
| TRAV6      | 0.25  | 5.39  | 1.68  | 0.09973 |

|            |       |       |       |         |
|------------|-------|-------|-------|---------|
| EML4       | -0.14 | 8.93  | -1.68 | 0.09988 |
| RPL9P32    | 0.15  | 5.29  | 1.68  | 0.09990 |
| ACYP2      | 0.13  | 6.29  | 1.67  | 0.10000 |
| RTN3       | -0.22 | 11.55 | -1.67 | 0.10005 |
| KLHL20     | -0.16 | 6.55  | -1.67 | 0.10007 |
| HYAL3      | 0.19  | 6.03  | 1.67  | 0.10015 |
| AC002350.2 | 0.22  | 5.16  | 1.67  | 0.10024 |
| TWISTNB    | 0.22  | 7.52  | 1.67  | 0.10027 |
| ALCAM      | -0.17 | 7.01  | -1.67 | 0.10030 |
| ZNF391     | -0.19 | 4.94  | -1.67 | 0.10034 |
| CTSO       | -0.14 | 7.70  | -1.67 | 0.10035 |
| C1QBP      | 0.11  | 9.14  | 1.67  | 0.10038 |
| AC012671.1 | 0.19  | 5.70  | 1.67  | 0.10045 |
| PSMF1      | 0.26  | 12.16 | 1.67  | 0.10047 |
| AL139095.2 | 0.26  | 8.91  | 1.67  | 0.10047 |
| ST13P15    | 0.17  | 5.56  | 1.67  | 0.10048 |
| BCL2L11    | -0.15 | 9.14  | -1.67 | 0.10056 |
| SSBP4      | 0.19  | 9.38  | 1.67  | 0.10062 |
| MTHFD2     | -0.18 | 7.96  | -1.67 | 0.10067 |
| TRGV10     | -0.20 | 5.84  | -1.67 | 0.10082 |
| SLC66A1    | 0.13  | 7.86  | 1.67  | 0.10085 |
| AC000089.1 | 0.22  | 7.61  | 1.67  | 0.10093 |
| AC246787.1 | 0.27  | 9.02  | 1.67  | 0.10094 |
| CEP250     | 0.12  | 10.09 | 1.67  | 0.10102 |
| PKMP4      | 0.19  | 5.62  | 1.67  | 0.10112 |
| OXA1L      | 0.11  | 11.49 | 1.67  | 0.10113 |
| AC026316.1 | 0.17  | 6.25  | 1.67  | 0.10117 |
| SEMA6B     | 0.43  | 5.60  | 1.67  | 0.10117 |
| CDC34      | 0.30  | 11.18 | 1.67  | 0.10119 |
| MSNP1      | -0.34 | 7.47  | -1.67 | 0.10124 |
| PCGF3      | -0.22 | 9.06  | -1.67 | 0.10125 |
| BCOR       | -0.21 | 8.73  | -1.67 | 0.10127 |
| BUB1       | -0.19 | 5.26  | -1.67 | 0.10128 |
| CAPZB      | 0.12  | 12.77 | 1.67  | 0.10134 |
| PITPNA-AS1 | 0.18  | 5.84  | 1.67  | 0.10143 |
| UQCRHL     | 0.15  | 6.86  | 1.67  | 0.10146 |
| PAN2       | -0.17 | 8.79  | -1.67 | 0.10149 |
| ATP5IF1    | 0.12  | 9.46  | 1.67  | 0.10153 |
| ZNF3       | 0.12  | 8.64  | 1.67  | 0.10159 |
| CMTM4      | -0.17 | 5.93  | -1.67 | 0.10161 |
| GNA15      | 0.17  | 9.17  | 1.67  | 0.10164 |
| CHST10     | 0.18  | 6.41  | 1.67  | 0.10166 |
| UPF3A      | 0.14  | 8.87  | 1.67  | 0.10172 |
| TMPRSS9    | 0.28  | 5.28  | 1.67  | 0.10179 |
| RPSAP58    | 0.26  | 9.75  | 1.67  | 0.10184 |
| SIRT1      | -0.18 | 7.19  | -1.67 | 0.10185 |
| COX6A1     | 0.17  | 9.44  | 1.66  | 0.10196 |
| BFAR       | 0.09  | 9.02  | 1.66  | 0.10215 |
| PDS5B      | -0.11 | 8.29  | -1.66 | 0.10219 |
| CD1D       | -0.14 | 9.32  | -1.66 | 0.10221 |

|             |       |       |       |         |
|-------------|-------|-------|-------|---------|
| RSBN1L      | 0.20  | 9.43  | 1.66  | 0.10232 |
| RTN2        | 0.18  | 7.59  | 1.66  | 0.10233 |
| UQCC1       | -0.13 | 8.32  | -1.66 | 0.10235 |
| ADAT2       | -0.25 | 6.29  | -1.66 | 0.10236 |
| SETD1B      | -0.11 | 10.53 | -1.66 | 0.10245 |
| H2BC21      | -0.26 | 8.47  | -1.66 | 0.10255 |
| AC090114.2  | 0.21  | 6.81  | 1.66  | 0.10255 |
| KLRB1       | 0.23  | 9.63  | 1.66  | 0.10258 |
| UBE3B       | -0.12 | 9.35  | -1.66 | 0.10258 |
| ZC3HC1      | 0.13  | 7.53  | 1.66  | 0.10262 |
| CDK2AP2     | 0.18  | 10.38 | 1.66  | 0.10273 |
| PDXDC1      | -0.14 | 8.85  | -1.66 | 0.10277 |
| ZNF77       | 0.15  | 6.05  | 1.66  | 0.10277 |
| NUTF2       | 0.13  | 10.07 | 1.66  | 0.10278 |
| SH2D1B      | -0.29 | 7.98  | -1.66 | 0.10282 |
| INPP5K      | 0.12  | 10.77 | 1.66  | 0.10289 |
| WIPF2       | 0.15  | 10.63 | 1.66  | 0.10292 |
| COLQ        | 0.24  | 7.40  | 1.66  | 0.10306 |
| ALG10B      | -0.17 | 5.42  | -1.66 | 0.10309 |
| CRYZL2P     | -0.15 | 5.48  | -1.66 | 0.10314 |
| AC018638.4  | -0.27 | 7.76  | -1.66 | 0.10315 |
| TAOK1       | -0.12 | 8.81  | -1.66 | 0.10318 |
| TTLL5       | -0.13 | 7.27  | -1.66 | 0.10318 |
| CXCL5       | -0.28 | 6.13  | -1.66 | 0.10321 |
| CLIC4       | -0.21 | 6.85  | -1.66 | 0.10327 |
| ZNF30       | -0.16 | 5.68  | -1.66 | 0.10330 |
| SCAMP4      | 0.15  | 9.10  | 1.66  | 0.10340 |
| NOL4L       | -0.16 | 9.12  | -1.66 | 0.10341 |
| PPM1D       | -0.15 | 7.50  | -1.66 | 0.10346 |
| OAZ1        | 0.24  | 14.67 | 1.66  | 0.10352 |
| AC147067.1  | 0.19  | 6.93  | 1.66  | 0.10355 |
| RELL1       | -0.21 | 7.86  | -1.66 | 0.10355 |
| SIPA1L1     | -0.15 | 10.54 | -1.66 | 0.10357 |
| BIN2P2      | -0.22 | 5.69  | -1.66 | 0.10358 |
| RPL3P7      | 0.30  | 8.83  | 1.66  | 0.10376 |
| UAP1L1      | -0.19 | 7.96  | -1.66 | 0.10391 |
| IL10RB-DT   | 0.20  | 5.90  | 1.65  | 0.10401 |
| WDSUB1      | -0.19 | 6.28  | -1.65 | 0.10404 |
| NHLRC4      | 0.17  | 5.20  | 1.65  | 0.10405 |
| NAIPP2      | -0.30 | 5.62  | -1.65 | 0.10405 |
| MIB2        | 0.18  | 8.45  | 1.65  | 0.10405 |
| NDUFS4      | 0.17  | 7.76  | 1.65  | 0.10411 |
| SRRD        | 0.19  | 8.58  | 1.65  | 0.10413 |
| JARID2      | -0.13 | 9.99  | -1.65 | 0.10413 |
| RPLP0P2     | 0.23  | 6.16  | 1.65  | 0.10420 |
| HIRA        | 0.12  | 7.78  | 1.65  | 0.10426 |
| CHCHD2      | 0.15  | 10.81 | 1.65  | 0.10429 |
| RNF139      | -0.12 | 8.21  | -1.65 | 0.10447 |
| BHLHE40-AS1 | 0.16  | 4.99  | 1.65  | 0.10452 |
| H3C6        | -0.24 | 5.45  | -1.65 | 0.10455 |

|             |       |       |       |         |
|-------------|-------|-------|-------|---------|
| H2AC6       | -0.27 | 10.66 | -1.65 | 0.10460 |
| AC005154.2  | -0.19 | 5.06  | -1.65 | 0.10464 |
| GNG2        | -0.15 | 10.24 | -1.65 | 0.10469 |
| GBP5        | -0.34 | 10.70 | -1.65 | 0.10470 |
| HDAC5       | 0.12  | 11.23 | 1.65  | 0.10487 |
| HAGHL       | 0.20  | 6.17  | 1.65  | 0.10490 |
| ARL4D       | 0.20  | 5.73  | 1.65  | 0.10494 |
| TMED1       | 0.15  | 8.43  | 1.65  | 0.10502 |
| NACC1       | 0.12  | 9.74  | 1.65  | 0.10507 |
| IGHD        | 0.36  | 11.28 | 1.65  | 0.10509 |
| TMEM87A     | -0.10 | 8.58  | -1.65 | 0.10509 |
| AP5Z1       | 0.13  | 10.32 | 1.65  | 0.10509 |
| CPNE1       | 0.16  | 11.39 | 1.65  | 0.10517 |
| PARTICL     | -0.12 | 5.27  | -1.65 | 0.10518 |
| AC104563.1  | 0.23  | 7.77  | 1.65  | 0.10521 |
| ZDHHC13     | -0.16 | 6.70  | -1.65 | 0.10525 |
| NBPF20      | -0.22 | 7.32  | -1.65 | 0.10536 |
| CD81        | 0.16  | 11.08 | 1.65  | 0.10539 |
| PRAG1       | 0.19  | 9.11  | 1.65  | 0.10539 |
| TRUB1       | -0.18 | 5.64  | -1.65 | 0.10551 |
| KLHDC10     | -0.11 | 7.88  | -1.65 | 0.10551 |
| AL034370.1  | -0.24 | 6.85  | -1.65 | 0.10555 |
| ALOX15P1    | 0.16  | 5.30  | 1.65  | 0.10557 |
| RPS2P55     | 0.21  | 8.02  | 1.65  | 0.10558 |
| DUSP18      | 0.22  | 7.68  | 1.65  | 0.10563 |
| RTF1        | 0.19  | 10.39 | 1.65  | 0.10565 |
| CTSC        | -0.16 | 11.13 | -1.65 | 0.10568 |
| FAM114A1    | -0.15 | 5.61  | -1.65 | 0.10575 |
| NDUFS6      | 0.22  | 9.47  | 1.65  | 0.10580 |
| NPIP815     | 0.38  | 5.70  | 1.65  | 0.10580 |
| KLHL9       | -0.15 | 7.79  | -1.65 | 0.10594 |
| AC245884.11 | -0.21 | 5.19  | -1.65 | 0.10600 |
| TOE1        | 0.09  | 7.74  | 1.64  | 0.10605 |
| AL033519.3  | 0.18  | 7.15  | 1.64  | 0.10606 |
| PRR14       | 0.14  | 10.72 | 1.64  | 0.10611 |
| FAM53B      | 0.13  | 10.92 | 1.64  | 0.10612 |
| NIT2        | 0.13  | 7.50  | 1.64  | 0.10613 |
| MRPS10      | 0.15  | 8.52  | 1.64  | 0.10613 |
| CNPY2       | 0.18  | 6.95  | 1.64  | 0.10617 |
| PHPT1       | 0.19  | 9.21  | 1.64  | 0.10617 |
| ZNF776      | -0.18 | 7.13  | -1.64 | 0.10618 |
| CASP5       | -0.34 | 6.63  | -1.64 | 0.10627 |
| PRELID3B    | -0.11 | 7.66  | -1.64 | 0.10630 |
| RPL35P5     | 0.23  | 7.47  | 1.64  | 0.10639 |
| ESS2        | 0.11  | 9.16  | 1.64  | 0.10641 |
| PPP1R14BP3  | 0.17  | 5.99  | 1.64  | 0.10647 |
| CD2AP       | -0.18 | 6.77  | -1.64 | 0.10647 |
| HIRIP3      | 0.15  | 8.36  | 1.64  | 0.10649 |
| MLKL        | -0.17 | 9.65  | -1.64 | 0.10650 |
| CD55        | -0.31 | 10.55 | -1.64 | 0.10657 |

|            |       |       |       |         |
|------------|-------|-------|-------|---------|
| ZNF575     | 0.16  | 6.43  | 1.64  | 0.10668 |
| CACNB3     | 0.17  | 6.43  | 1.64  | 0.10674 |
| SMARCAL1   | 0.12  | 8.77  | 1.64  | 0.10678 |
| MAPK1IP1L  | -0.08 | 9.28  | -1.64 | 0.10681 |
| MTCO2P12   | 0.21  | 8.73  | 1.64  | 0.10684 |
| CD300E     | -0.27 | 10.74 | -1.64 | 0.10684 |
| CDC6       | -0.19 | 5.05  | -1.64 | 0.10685 |
| ATF1       | -0.13 | 7.20  | -1.64 | 0.10695 |
| FBXO2      | 0.22  | 6.40  | 1.64  | 0.10700 |
| CSRNP2     | -0.14 | 7.50  | -1.64 | 0.10700 |
| EZH2       | -0.14 | 6.83  | -1.64 | 0.10702 |
| TSKS       | 0.28  | 5.35  | 1.64  | 0.10705 |
| AKIRIN2    | -0.16 | 9.62  | -1.64 | 0.10711 |
| SCRN3      | -0.13 | 6.14  | -1.64 | 0.10713 |
| AEBP1      | 0.30  | 7.83  | 1.64  | 0.10723 |
| DHRS4L2    | 0.18  | 7.52  | 1.64  | 0.10734 |
| TRBJ2-4    | 0.14  | 5.30  | 1.64  | 0.10737 |
| ANKRD26    | 0.21  | 6.58  | 1.64  | 0.10744 |
| CYHR1      | 0.13  | 10.08 | 1.64  | 0.10751 |
| DOK2       | 0.18  | 11.60 | 1.64  | 0.10759 |
| PGM5       | -0.33 | 5.81  | -1.64 | 0.10763 |
| OSTM1      | -0.14 | 8.44  | -1.64 | 0.10778 |
| ZNF22      | -0.13 | 7.95  | -1.64 | 0.10792 |
| EGR1       | -0.21 | 6.06  | -1.64 | 0.10793 |
| LACTB      | -0.16 | 8.36  | -1.64 | 0.10794 |
| IGLV3-25   | 0.38  | 6.95  | 1.64  | 0.10794 |
| THOC6      | 0.16  | 8.96  | 1.64  | 0.10794 |
| TRMT1      | 0.16  | 9.40  | 1.64  | 0.10800 |
| SEC24A     | -0.17 | 6.77  | -1.64 | 0.10808 |
| ST6GALNAC6 | 0.23  | 5.36  | 1.64  | 0.10811 |
| PPP1R3B    | -0.28 | 9.75  | -1.63 | 0.10818 |
| ARNT       | -0.13 | 8.95  | -1.63 | 0.10821 |
| CTNNA1P1   | -0.19 | 5.30  | -1.63 | 0.10822 |
| ATIC       | 0.12  | 9.13  | 1.63  | 0.10831 |
| AC097376.1 | 0.24  | 5.23  | 1.63  | 0.10834 |
| ETV7       | -0.45 | 6.88  | -1.63 | 0.10836 |
| IFIT3      | -0.48 | 10.59 | -1.63 | 0.10836 |
| UGCG       | -0.23 | 7.58  | -1.63 | 0.10848 |
| AC106872.2 | 0.16  | 6.29  | 1.63  | 0.10861 |
| NIBAN1     | -0.29 | 11.44 | -1.63 | 0.10863 |
| ZNF146     | -0.17 | 7.95  | -1.63 | 0.10864 |
| SLFN13     | -0.18 | 8.00  | -1.63 | 0.10865 |
| C6orf47    | 0.11  | 9.36  | 1.63  | 0.10868 |
| TADA2B     | -0.10 | 10.01 | -1.63 | 0.10872 |
| HMG3P1     | 0.16  | 5.19  | 1.63  | 0.10874 |
| AC012618.1 | 0.25  | 8.08  | 1.63  | 0.10874 |
| NOP58      | 0.14  | 9.11  | 1.63  | 0.10876 |
| PIAS1      | -0.14 | 9.74  | -1.63 | 0.10886 |
| GK         | -0.28 | 8.24  | -1.63 | 0.10891 |
| MTO1       | -0.10 | 8.24  | -1.63 | 0.10891 |

|            |       |       |       |         |
|------------|-------|-------|-------|---------|
| AC135068.6 | 0.15  | 5.34  | 1.63  | 0.10893 |
| TASP1      | -0.15 | 6.14  | -1.63 | 0.10897 |
| BCL6       | -0.35 | 12.12 | -1.63 | 0.10901 |
| ZBTB43     | -0.11 | 7.33  | -1.63 | 0.10906 |
| AL512844.1 | -0.24 | 5.09  | -1.63 | 0.10907 |
| SLC25A3    | 0.10  | 11.30 | 1.63  | 0.10922 |
| PLCB1      | -0.16 | 5.95  | -1.63 | 0.10935 |
| PNPLA1     | -0.23 | 6.40  | -1.63 | 0.10957 |
| ATXN7L2    | 0.16  | 7.31  | 1.63  | 0.10968 |
| HLA-L      | -0.55 | 9.79  | -1.63 | 0.10973 |
| MAP4K2     | 0.09  | 10.67 | 1.63  | 0.10974 |
| RPL23AP57  | 0.13  | 5.50  | 1.63  | 0.10977 |
| RNH1       | 0.18  | 11.46 | 1.63  | 0.10983 |
| B2M        | -0.16 | 16.09 | -1.63 | 0.10984 |
| INAFM2     | -0.14 | 8.47  | -1.63 | 0.10990 |
| PLEKHG3    | -0.15 | 11.36 | -1.63 | 0.10992 |
| UBE2L3     | 0.12  | 10.76 | 1.63  | 0.10994 |
| AC020893.2 | -0.14 | 5.29  | -1.63 | 0.10995 |
| CDKL5      | -0.20 | 6.77  | -1.63 | 0.10997 |
| ZBTB80S    | 0.15  | 7.71  | 1.63  | 0.11002 |
| SLA2       | 0.13  | 9.59  | 1.63  | 0.11007 |
| PRDM8      | -0.19 | 7.43  | -1.63 | 0.11007 |
| CEP192     | -0.15 | 7.77  | -1.63 | 0.11017 |
| NUDT22     | 0.14  | 8.93  | 1.63  | 0.11018 |
| TRIM21     | -0.17 | 10.44 | -1.62 | 0.11027 |
| ZSWIM1     | -0.12 | 7.55  | -1.62 | 0.11027 |
| MYO1C      | 0.16  | 8.65  | 1.62  | 0.11034 |
| EIF3I      | 0.14  | 10.93 | 1.62  | 0.11041 |
| TRAV8-4    | 0.23  | 6.41  | 1.62  | 0.11046 |
| PCCA-DT    | 0.18  | 5.05  | 1.62  | 0.11047 |
| RAP1GAP    | 0.57  | 5.76  | 1.62  | 0.11047 |
| ZNF282     | 0.10  | 9.02  | 1.62  | 0.11056 |
| RPL12P4    | 0.25  | 8.08  | 1.62  | 0.11058 |
| PPIE       | 0.12  | 9.48  | 1.62  | 0.11065 |
| NOL8       | -0.12 | 8.10  | -1.62 | 0.11065 |
| PREPL      | -0.16 | 7.39  | -1.62 | 0.11070 |
| CAB39      | -0.18 | 10.11 | -1.62 | 0.11078 |
| FTX        | -0.24 | 7.87  | -1.62 | 0.11082 |
| CAPN5      | 0.21  | 7.54  | 1.62  | 0.11087 |
| GTF3A      | 0.13  | 10.64 | 1.62  | 0.11091 |
| CERNA1     | 0.21  | 5.07  | 1.62  | 0.11091 |
| NUP50      | -0.14 | 10.09 | -1.62 | 0.11094 |
| COPS6      | 0.12  | 9.80  | 1.62  | 0.11097 |
| U2AF1L4    | 0.17  | 7.49  | 1.62  | 0.11100 |
| RCE1       | 0.13  | 8.32  | 1.62  | 0.11104 |
| NSF        | -0.11 | 8.29  | -1.62 | 0.11109 |
| AC073111.4 | 0.18  | 7.93  | 1.62  | 0.11110 |
| MAPK14     | -0.22 | 10.71 | -1.62 | 0.11114 |
| TIGAR      | 0.19  | 6.63  | 1.62  | 0.11117 |
| CCDC115    | 0.09  | 9.27  | 1.62  | 0.11125 |



|            |       |       |       |         |
|------------|-------|-------|-------|---------|
| ARHGAP18   | -0.16 | 6.84  | -1.62 | 0.11131 |
| H19        | 0.32  | 6.00  | 1.62  | 0.11132 |
| ZNF469     | 0.15  | 6.17  | 1.62  | 0.11133 |
| SPTAN1     | 0.13  | 12.48 | 1.62  | 0.11143 |
| AC108488.3 | 0.17  | 5.11  | 1.62  | 0.11144 |
| PRKCZ      | 0.14  | 8.86  | 1.62  | 0.11149 |
| TPI1       | 0.15  | 12.11 | 1.62  | 0.11152 |
| ANKRD12    | 0.25  | 10.88 | 1.62  | 0.11156 |
| VTA1       | -0.13 | 7.91  | -1.62 | 0.11161 |
| SSBP1      | 0.14  | 8.70  | 1.62  | 0.11164 |
| BAG1       | 0.30  | 11.90 | 1.62  | 0.11167 |
| AL009179.1 | 0.18  | 5.00  | 1.62  | 0.11169 |
| KLRC1      | -0.28 | 6.03  | -1.62 | 0.11176 |
| ATF6B      | 0.12  | 11.26 | 1.62  | 0.11191 |
| PSMB4      | 0.12  | 11.33 | 1.62  | 0.11202 |
| FEZ2       | -0.10 | 7.45  | -1.62 | 0.11203 |
| AC005674.2 | -0.25 | 6.98  | -1.62 | 0.11205 |
| MRPL36     | 0.18  | 7.79  | 1.62  | 0.11208 |
| C5orf63    | 0.15  | 5.62  | 1.62  | 0.11213 |
| ATG12      | -0.10 | 8.30  | -1.62 | 0.11216 |
| AC009061.2 | 0.27  | 7.27  | 1.62  | 0.11222 |
| RELB       | 0.16  | 9.31  | 1.62  | 0.11223 |
| METTL8     | 0.17  | 6.73  | 1.62  | 0.11233 |
| APOBEC3G   | -0.16 | 10.13 | -1.62 | 0.11238 |
| TMEM255B   | 0.19  | 5.48  | 1.61  | 0.11240 |
| RAB11FIP3  | 0.11  | 8.73  | 1.61  | 0.11246 |
| LRRC40     | -0.15 | 6.04  | -1.61 | 0.11246 |
| AL158212.3 | -0.19 | 6.57  | -1.61 | 0.11252 |
| FXN        | 0.15  | 6.33  | 1.61  | 0.11263 |
| IL1RN      | -0.27 | 10.10 | -1.61 | 0.11270 |
| CACNA1E    | -0.31 | 6.43  | -1.61 | 0.11270 |
| CDK11B     | 0.12  | 10.12 | 1.61  | 0.11277 |
| AP003307.2 | 0.14  | 5.10  | 1.61  | 0.11278 |
| PPM1K      | 0.20  | 9.32  | 1.61  | 0.11283 |
| RALGAPA2   | -0.24 | 9.52  | -1.61 | 0.11283 |
| GUK1       | 0.31  | 12.57 | 1.61  | 0.11297 |
| FNIP2      | -0.18 | 6.65  | -1.61 | 0.11298 |
| SLC39A13   | 0.12  | 9.35  | 1.61  | 0.11298 |
| PCNX2      | 0.16  | 8.43  | 1.61  | 0.11300 |
| RPS7P14    | 0.17  | 5.65  | 1.61  | 0.11320 |
| KCNH2      | 0.21  | 6.70  | 1.61  | 0.11341 |
| PLEK2      | 0.36  | 6.81  | 1.61  | 0.11349 |
| HEATR9     | -0.25 | 5.31  | -1.61 | 0.11358 |
| GOLGA8N    | -0.19 | 5.08  | -1.61 | 0.11361 |
| PINK1-AS   | 0.14  | 6.55  | 1.61  | 0.11362 |
| RPS11P5    | 0.27  | 10.37 | 1.61  | 0.11368 |
| LETM2      | -0.16 | 6.60  | -1.61 | 0.11370 |
| RPL12P12   | 0.15  | 5.91  | 1.61  | 0.11370 |
| SYCP2      | -0.20 | 5.05  | -1.61 | 0.11376 |
| KANSL1     | -0.11 | 9.91  | -1.61 | 0.11376 |

|            |       |       |       |         |
|------------|-------|-------|-------|---------|
| HOXB3      | -0.19 | 5.30  | -1.61 | 0.11379 |
| EEF1A1P7   | 0.12  | 5.57  | 1.61  | 0.11385 |
| RPL7P9     | 0.22  | 9.60  | 1.61  | 0.11388 |
| FBXO28     | -0.14 | 7.45  | -1.61 | 0.11396 |
| ACSF2      | 0.15  | 8.23  | 1.61  | 0.11398 |
| SERINC3    | -0.14 | 10.38 | -1.61 | 0.11408 |
| ARFIP2     | 0.11  | 9.14  | 1.61  | 0.11409 |
| STK26      | -0.18 | 7.83  | -1.61 | 0.11410 |
| LINC02361  | 0.15  | 6.75  | 1.61  | 0.11413 |
| MME        | -0.29 | 10.44 | -1.61 | 0.11418 |
| AC026436.1 | 0.16  | 5.12  | 1.61  | 0.11427 |
| PTRHD1     | 0.17  | 7.87  | 1.61  | 0.11434 |
| ATP6V1E2   | 0.13  | 7.15  | 1.61  | 0.11435 |
| ARRDC2     | 0.10  | 10.88 | 1.61  | 0.11440 |
| CAPNS1     | 0.15  | 12.97 | 1.61  | 0.11441 |
| PEX2       | -0.13 | 7.79  | -1.61 | 0.11447 |
| BHLHE40    | -0.16 | 10.10 | -1.61 | 0.11447 |
| SMARCD1    | 0.08  | 10.12 | 1.61  | 0.11448 |
| FTSJ1      | 0.11  | 8.66  | 1.61  | 0.11457 |
| AL096816.1 | -0.16 | 6.56  | -1.60 | 0.11467 |
| ATF7       | -0.11 | 8.16  | -1.60 | 0.11471 |
| CHMP1A     | 0.13  | 10.75 | 1.60  | 0.11485 |
| RTL8C      | 0.14  | 8.99  | 1.60  | 0.11485 |
| UBE2S      | 0.17  | 7.28  | 1.60  | 0.11503 |
| CREG1      | -0.19 | 9.02  | -1.60 | 0.11504 |
| AC097376.3 | 0.25  | 7.02  | 1.60  | 0.11504 |
| HCST       | 0.19  | 11.15 | 1.60  | 0.11507 |
| FSTL1      | 0.27  | 5.98  | 1.60  | 0.11509 |
| RPL14P1    | 0.21  | 10.11 | 1.60  | 0.11514 |
| TUBB4B     | 0.13  | 10.80 | 1.60  | 0.11527 |
| RPS2P4     | 0.13  | 5.69  | 1.60  | 0.11530 |
| HSPA9      | -0.11 | 9.84  | -1.60 | 0.11537 |
| CLYBL      | 0.16  | 6.45  | 1.60  | 0.11548 |
| AC025458.1 | 0.23  | 6.87  | 1.60  | 0.11554 |
| KRBOX4     | -0.14 | 6.63  | -1.60 | 0.11556 |
| FOXP3      | 0.20  | 7.91  | 1.60  | 0.11562 |
| LCMT1      | 0.14  | 8.65  | 1.60  | 0.11568 |
| RCAN3AS    | 0.15  | 5.31  | 1.60  | 0.11569 |
| THG1L      | 0.13  | 7.54  | 1.60  | 0.11569 |
| VAPB       | -0.07 | 8.50  | -1.60 | 0.11572 |
| AC026401.3 | 0.21  | 7.50  | 1.60  | 0.11578 |
| DHRS11     | 0.14  | 6.11  | 1.60  | 0.11582 |
| ZNF772     | -0.19 | 5.56  | -1.60 | 0.11592 |
| TRIB1      | -0.25 | 8.46  | -1.60 | 0.11593 |
| ENTPD7     | -0.17 | 6.03  | -1.60 | 0.11599 |
| DPY30      | 0.11  | 8.23  | 1.60  | 0.11600 |
| DENND3     | -0.23 | 11.97 | -1.60 | 0.11605 |
| PKD1P6     | -0.21 | 5.22  | -1.60 | 0.11609 |
| KDELRL1    | 0.13  | 10.19 | 1.60  | 0.11628 |
| TCEAL1     | 0.18  | 5.64  | 1.60  | 0.11628 |

|            |       |       |       |         |
|------------|-------|-------|-------|---------|
| ANAPC2     | 0.11  | 9.65  | 1.60  | 0.11633 |
| AARSD1     | 0.17  | 5.28  | 1.60  | 0.11637 |
| PHKB       | -0.10 | 8.95  | -1.60 | 0.11637 |
| CTDSP2     | -0.13 | 12.01 | -1.60 | 0.11637 |
| RAB5A      | -0.15 | 8.19  | -1.60 | 0.11644 |
| CIAO2B     | 0.14  | 9.53  | 1.60  | 0.11644 |
| PNKP       | 0.14  | 9.74  | 1.60  | 0.11647 |
| ATP6V1C1   | -0.21 | 8.48  | -1.60 | 0.11650 |
| ARCN1      | -0.08 | 10.02 | -1.60 | 0.11658 |
| SNRPB2     | 0.13  | 8.85  | 1.60  | 0.11662 |
| FOSL2      | -0.22 | 11.05 | -1.60 | 0.11666 |
| KCTD13     | 0.14  | 8.79  | 1.60  | 0.11669 |
| RPSAP45    | 0.15  | 5.40  | 1.60  | 0.11671 |
| CYFIP1     | -0.15 | 9.10  | -1.60 | 0.11674 |
| BMERB1     | 0.21  | 5.94  | 1.60  | 0.11676 |
| TAF1D      | -0.09 | 8.60  | -1.59 | 0.11682 |
| TSEN54     | 0.15  | 9.64  | 1.59  | 0.11696 |
| AGAP2      | 0.11  | 10.45 | 1.59  | 0.11701 |
| SLC27A4    | 0.14  | 8.50  | 1.59  | 0.11705 |
| TRABD2A    | 0.25  | 9.82  | 1.59  | 0.11708 |
| AC107983.1 | 0.20  | 7.39  | 1.59  | 0.11709 |
| SNHG29     | 0.15  | 10.63 | 1.59  | 0.11710 |
| FCRL1      | -0.33 | 7.33  | -1.59 | 0.11716 |
| PSMD1      | 0.11  | 9.27  | 1.59  | 0.11718 |
| DENND4B    | -0.14 | 11.28 | -1.59 | 0.11726 |
| DNAJB5     | -0.23 | 6.37  | -1.59 | 0.11731 |
| ZBED5      | -0.12 | 8.64  | -1.59 | 0.11732 |
| JADE3      | -0.22 | 4.97  | -1.59 | 0.11737 |
| EIF2AK4    | -0.15 | 7.92  | -1.59 | 0.11739 |
| FGFR1OP    | -0.17 | 6.93  | -1.59 | 0.11747 |
| LSS        | 0.14  | 9.17  | 1.59  | 0.11748 |
| KLRK1      | -0.23 | 5.19  | -1.59 | 0.11749 |
| MITF       | -0.16 | 5.38  | -1.59 | 0.11759 |
| RPS3P6     | 0.14  | 5.91  | 1.59  | 0.11764 |
| EIF6       | 0.16  | 9.89  | 1.59  | 0.11765 |
| SH3GLB1    | -0.19 | 9.85  | -1.59 | 0.11767 |
| BNIP3      | 0.14  | 7.24  | 1.59  | 0.11780 |
| IFNAR2     | -0.13 | 9.69  | -1.59 | 0.11780 |
| MYPOP      | 0.13  | 7.47  | 1.59  | 0.11791 |
| ZNF793     | 0.21  | 5.73  | 1.59  | 0.11793 |
| AC243829.1 | -0.32 | 5.32  | -1.59 | 0.11794 |
| RPL37AP8   | 0.16  | 5.82  | 1.59  | 0.11798 |
| PSMA3-AS1  | -0.17 | 8.86  | -1.59 | 0.11802 |
| HBS1L      | -0.12 | 7.47  | -1.59 | 0.11805 |
| TOMM22     | 0.13  | 9.45  | 1.59  | 0.11806 |
| SNRPC      | 0.16  | 8.84  | 1.59  | 0.11818 |
| NCLN       | 0.13  | 10.32 | 1.59  | 0.11828 |
| AL022344.1 | 0.20  | 5.21  | 1.59  | 0.11834 |
| CNBP       | -0.10 | 11.91 | -1.59 | 0.11837 |
| LSM5       | 0.17  | 6.96  | 1.59  | 0.11845 |

|            |       |       |       |         |
|------------|-------|-------|-------|---------|
| BTNL3      | -0.73 | 6.53  | -1.59 | 0.11846 |
| TOLLIP     | 0.14  | 10.39 | 1.59  | 0.11847 |
| PRADC1     | 0.17  | 7.27  | 1.59  | 0.11847 |
| AL441992.2 | 0.17  | 5.48  | 1.59  | 0.11848 |
| AC025627.3 | 0.20  | 5.12  | 1.59  | 0.11856 |
| RAB21      | -0.12 | 8.96  | -1.59 | 0.11868 |
| MAD2L2     | 0.17  | 9.24  | 1.59  | 0.11871 |
| KLF11      | -0.16 | 8.14  | -1.59 | 0.11873 |
| HMGNS      | 0.17  | 5.64  | 1.59  | 0.11877 |
| CXXC5      | 0.16  | 9.21  | 1.59  | 0.11882 |
| CLIC2      | -0.23 | 5.58  | -1.59 | 0.11884 |
| FAM13B     | -0.14 | 8.10  | -1.59 | 0.11886 |
| GPX7       | 0.15  | 7.52  | 1.59  | 0.11894 |
| LAS1L      | 0.13  | 9.32  | 1.59  | 0.11901 |
| MED7       | 0.12  | 6.78  | 1.58  | 0.11910 |
| SAE1       | 0.11  | 9.50  | 1.58  | 0.11911 |
| HBA1       | 0.44  | 12.89 | 1.58  | 0.11914 |
| CRAT       | 0.15  | 9.08  | 1.58  | 0.11917 |
| USP48      | -0.12 | 8.99  | -1.58 | 0.11917 |
| LRRFIP2    | -0.14 | 8.29  | -1.58 | 0.11917 |
| RPS14P8    | 0.32  | 6.10  | 1.58  | 0.11926 |
| R3HDM1     | -0.13 | 7.83  | -1.58 | 0.11934 |
| FAM126A    | -0.13 | 7.03  | -1.58 | 0.11934 |
| DPCD       | 0.27  | 6.48  | 1.58  | 0.11937 |
| SNX14      | -0.12 | 8.00  | -1.58 | 0.11948 |
| CSNK1G2    | 0.11  | 11.20 | 1.58  | 0.11950 |
| PPP3CC     | 0.12  | 8.43  | 1.58  | 0.11960 |
| DAZAP2P1   | -0.20 | 6.50  | -1.58 | 0.11972 |
| MT-CO1     | -0.13 | 15.59 | -1.58 | 0.11973 |
| CFL1       | 0.15  | 14.23 | 1.58  | 0.11974 |
| EHD1       | 0.13  | 12.71 | 1.58  | 0.11983 |
| RBMXL1     | -0.12 | 7.39  | -1.58 | 0.11983 |
| IMPDH1P3   | -0.16 | 5.09  | -1.58 | 0.11988 |
| SECISBP2L  | -0.17 | 7.45  | -1.58 | 0.12003 |
| BCL7A      | 0.22  | 7.20  | 1.58  | 0.12012 |
| TPK1       | -0.17 | 7.47  | -1.58 | 0.12019 |
| ATXN7      | -0.18 | 8.73  | -1.58 | 0.12024 |
| EIF3H      | 0.11  | 11.62 | 1.58  | 0.12026 |
| JADE1      | 0.14  | 9.33  | 1.58  | 0.12031 |
| DNAJA1     | -0.12 | 10.23 | -1.58 | 0.12036 |
| PDHX       | -0.15 | 6.62  | -1.58 | 0.12042 |
| TRIM56     | 0.17  | 11.38 | 1.58  | 0.12044 |
| RBM48      | -0.11 | 7.35  | -1.58 | 0.12044 |
| BAK1       | 0.16  | 9.55  | 1.58  | 0.12046 |
| NHLRC3     | -0.15 | 7.09  | -1.58 | 0.12051 |
| RPS27AP16  | 0.23  | 9.91  | 1.58  | 0.12054 |
| ARMH1      | 0.19  | 8.87  | 1.58  | 0.12061 |
| AC017116.2 | 0.25  | 5.70  | 1.58  | 0.12064 |
| PLVAP      | 0.36  | 7.80  | 1.58  | 0.12075 |
| KCNAB3     | -0.20 | 6.01  | -1.58 | 0.12075 |

|            |       |       |       |         |
|------------|-------|-------|-------|---------|
| LINC00638  | 0.19  | 5.78  | 1.58  | 0.12076 |
| ZNF674-AS1 | -0.17 | 5.32  | -1.58 | 0.12079 |
| BZW1P2     | -0.24 | 5.54  | -1.58 | 0.12092 |
| AC005072.1 | 0.23  | 5.10  | 1.58  | 0.12094 |
| PDS5A      | -0.14 | 9.08  | -1.58 | 0.12095 |
| AC078899.1 | -0.29 | 5.46  | -1.58 | 0.12105 |
| AC026471.1 | 0.17  | 6.04  | 1.58  | 0.12108 |
| SPRTN      | -0.14 | 6.30  | -1.58 | 0.12109 |
| ZNF678     | -0.14 | 5.84  | -1.58 | 0.12118 |
| RAD51D     | 0.15  | 7.64  | 1.58  | 0.12123 |
| TGS1       | -0.12 | 7.94  | -1.58 | 0.12124 |
| ICAM3      | 0.19  | 13.94 | 1.58  | 0.12126 |
| RASGRP1    | -0.18 | 8.66  | -1.58 | 0.12127 |
| COA8       | 0.13  | 7.78  | 1.58  | 0.12127 |
| MYL6B      | 0.20  | 6.55  | 1.57  | 0.12142 |
| ERAP2      | 0.49  | 9.58  | 1.57  | 0.12145 |
| MAVS       | 0.10  | 10.50 | 1.57  | 0.12145 |
| EHD3       | 0.19  | 8.36  | 1.57  | 0.12149 |
| MCCC2      | -0.11 | 7.95  | -1.57 | 0.12155 |
| TAF3       | 0.19  | 8.53  | 1.57  | 0.12157 |
| QSER1      | -0.15 | 6.42  | -1.57 | 0.12174 |
| CLIP4      | -0.17 | 7.12  | -1.57 | 0.12174 |
| KLC3       | 0.35  | 6.78  | 1.57  | 0.12176 |
| RFC5       | -0.12 | 6.76  | -1.57 | 0.12177 |
| AL138756.1 | -0.15 | 7.61  | -1.57 | 0.12182 |
| SCART1     | -0.24 | 5.74  | -1.57 | 0.12191 |
| ZNF232     | 0.12  | 6.60  | 1.57  | 0.12193 |
| AL353625.1 | -0.24 | 6.23  | -1.57 | 0.12195 |
| AZIN1      | -0.16 | 8.90  | -1.57 | 0.12195 |
| CIDECP1    | 0.14  | 8.10  | 1.57  | 0.12199 |
| PARP11     | -0.14 | 6.68  | -1.57 | 0.12210 |
| AP001107.9 | 0.20  | 5.13  | 1.57  | 0.12210 |
| MEA1       | 0.14  | 9.56  | 1.57  | 0.12216 |
| TARS2      | 0.09  | 8.60  | 1.57  | 0.12218 |
| MVB12A     | 0.13  | 8.84  | 1.57  | 0.12219 |
| FBXO22     | -0.13 | 6.94  | -1.57 | 0.12227 |
| VPS25      | 0.12  | 9.13  | 1.57  | 0.12229 |
| KIF13B     | -0.10 | 8.59  | -1.57 | 0.12231 |
| ST6GALNAC2 | -0.28 | 7.11  | -1.57 | 0.12241 |
| TJAP1      | 0.11  | 9.11  | 1.57  | 0.12241 |
| SH3TC2     | -0.22 | 5.52  | -1.57 | 0.12243 |
| CD44       | -0.10 | 12.15 | -1.57 | 0.12246 |
| CEP135     | -0.15 | 6.82  | -1.57 | 0.12249 |
| UBTD2      | -0.15 | 6.37  | -1.57 | 0.12256 |
| C5orf15    | -0.12 | 8.26  | -1.57 | 0.12264 |
| NFYA       | -0.14 | 8.34  | -1.57 | 0.12270 |
| AL590617.1 | -0.17 | 5.45  | -1.57 | 0.12274 |
| RPL30P4    | 0.22  | 9.20  | 1.57  | 0.12282 |
| AC108134.3 | -0.23 | 8.26  | -1.57 | 0.12289 |
| FIGNL1     | -0.18 | 5.68  | -1.57 | 0.12290 |

|            |       |       |       |         |
|------------|-------|-------|-------|---------|
| HNRNPH1    | -0.14 | 11.10 | -1.57 | 0.12292 |
| POLB       | -0.15 | 8.56  | -1.57 | 0.12301 |
| RERE-AS1   | -0.24 | 6.70  | -1.57 | 0.12303 |
| AL450998.1 | 0.25  | 7.82  | 1.57  | 0.12311 |
| EMC4       | 0.10  | 8.83  | 1.57  | 0.12312 |
| ZNF787     | 0.17  | 8.91  | 1.57  | 0.12314 |
| UBE2D1     | -0.26 | 8.66  | -1.57 | 0.12318 |
| RUBCNL     | -0.18 | 9.68  | -1.57 | 0.12322 |
| SLC22A16   | -0.21 | 5.29  | -1.57 | 0.12322 |
| CD40LG     | 0.19  | 8.30  | 1.57  | 0.12325 |
| WDPCP      | 0.16  | 6.29  | 1.57  | 0.12329 |
| TMEM161A   | 0.14  | 7.82  | 1.57  | 0.12331 |
| TRPS1      | -0.15 | 6.86  | -1.57 | 0.12337 |
| CLIC3      | 0.25  | 8.50  | 1.57  | 0.12339 |
| CLCN6      | -0.15 | 8.10  | -1.57 | 0.12340 |
| BX322784.1 | -0.16 | 5.48  | -1.57 | 0.12342 |
| CDCA7      | -0.16 | 5.26  | -1.57 | 0.12343 |
| TNPO1      | -0.13 | 8.32  | -1.57 | 0.12352 |
| DANCR      | 0.14  | 8.11  | 1.57  | 0.12354 |
| TLE2       | 0.21  | 7.26  | 1.57  | 0.12360 |
| AC016957.2 | 0.18  | 7.42  | 1.56  | 0.12368 |
| BCAP31     | 0.14  | 11.61 | 1.56  | 0.12369 |
| NIPSNAP3A  | -0.14 | 6.88  | -1.56 | 0.12380 |
| AC099789.1 | 0.22  | 5.88  | 1.56  | 0.12381 |
| CCDC126    | -0.20 | 6.16  | -1.56 | 0.12387 |
| BET1L      | 0.09  | 10.50 | 1.56  | 0.12394 |
| KIF1C-AS1  | 0.20  | 5.20  | 1.56  | 0.12404 |
| INTS8      | -0.12 | 8.20  | -1.56 | 0.12408 |
| CCNYL1     | -0.16 | 6.77  | -1.56 | 0.12411 |
| AC019069.1 | 0.17  | 5.56  | 1.56  | 0.12414 |
| AC093525.8 | -0.18 | 5.63  | -1.56 | 0.12428 |
| HELQ       | -0.13 | 7.16  | -1.56 | 0.12428 |
| AHSA2P     | -0.24 | 9.25  | -1.56 | 0.12436 |
| ATP13A2    | 0.15  | 9.85  | 1.56  | 0.12437 |
| SLC26A8    | -0.28 | 6.74  | -1.56 | 0.12442 |
| FAM169A    | -0.18 | 5.68  | -1.56 | 0.12444 |
| PANK4      | 0.08  | 9.54  | 1.56  | 0.12451 |
| VCPKMT     | -0.19 | 7.53  | -1.56 | 0.12457 |
| NDUFB5     | 0.11  | 8.13  | 1.56  | 0.12460 |
| KDSR       | 0.13  | 7.85  | 1.56  | 0.12467 |
| RFX5       | -0.11 | 9.34  | -1.56 | 0.12470 |
| C2CD3      | -0.10 | 8.43  | -1.56 | 0.12481 |
| MALAT1     | 0.32  | 14.05 | 1.56  | 0.12482 |
| CLTA       | 0.16  | 10.06 | 1.56  | 0.12491 |
| PPP1R9B    | 0.11  | 12.13 | 1.56  | 0.12502 |
| CMKLR1     | -0.23 | 8.84  | -1.56 | 0.12503 |
| CORO1A     | 0.12  | 14.65 | 1.56  | 0.12505 |
| NLE1       | 0.15  | 7.89  | 1.56  | 0.12516 |
| AP002387.2 | 0.22  | 7.17  | 1.56  | 0.12525 |
| DAP3P2     | 0.19  | 5.17  | 1.56  | 0.12537 |

|            |       |       |       |         |
|------------|-------|-------|-------|---------|
| MAPK11     | 0.16  | 6.46  | 1.56  | 0.12540 |
| CHKB-CPT1B | -0.16 | 5.01  | -1.56 | 0.12544 |
| RANBP1     | 0.13  | 8.88  | 1.56  | 0.12554 |
| MTRR       | -0.16 | 7.35  | -1.56 | 0.12562 |
| ZBTB44     | -0.12 | 8.96  | -1.56 | 0.12563 |
| SLC22A17   | 0.24  | 6.39  | 1.56  | 0.12569 |
| ZKSCAN2-DT | -0.18 | 5.48  | -1.56 | 0.12570 |
| NCOA4P3    | -0.23 | 5.14  | -1.56 | 0.12573 |
| ADIPOR2    | -0.09 | 9.66  | -1.56 | 0.12573 |
| CARHSP1    | 0.12  | 9.74  | 1.56  | 0.12576 |
| AC002316.1 | -0.15 | 10.74 | -1.56 | 0.12589 |
| CERCAM     | 0.26  | 6.30  | 1.56  | 0.12591 |
| TMC8       | 0.10  | 12.28 | 1.56  | 0.12592 |
| MYBL2      | 0.29  | 7.11  | 1.56  | 0.12599 |
| HOOK2      | 0.17  | 7.54  | 1.55  | 0.12617 |
| MKNK1      | -0.25 | 10.12 | -1.55 | 0.12617 |
| WWC3       | -0.17 | 9.98  | -1.55 | 0.12620 |
| PHTF1      | -0.22 | 7.25  | -1.55 | 0.12626 |
| FXR2       | 0.10  | 9.38  | 1.55  | 0.12631 |
| CRTAM      | -0.16 | 7.26  | -1.55 | 0.12641 |
| ZNF268     | 0.16  | 7.09  | 1.55  | 0.12648 |
| PPFIA4     | -0.24 | 5.47  | -1.55 | 0.12649 |
| GLT1D1     | -0.24 | 11.02 | -1.55 | 0.12662 |
| RPSAP19    | 0.21  | 7.91  | 1.55  | 0.12664 |
| MRPS16     | 0.12  | 8.62  | 1.55  | 0.12666 |
| AP3S2      | 0.12  | 8.29  | 1.55  | 0.12666 |
| CNFN       | 0.18  | 5.02  | 1.55  | 0.12676 |
| VPS37A     | -0.13 | 7.05  | -1.55 | 0.12697 |
| ATXN1      | -0.15 | 8.98  | -1.55 | 0.12697 |
| ASH1L      | -0.19 | 8.74  | -1.55 | 0.12703 |
| VAC14      | 0.10  | 9.30  | 1.55  | 0.12703 |
| ARHGAP19   | -0.15 | 8.45  | -1.55 | 0.12705 |
| SPAG1      | -0.17 | 5.59  | -1.55 | 0.12709 |
| BSG        | 0.21  | 13.04 | 1.55  | 0.12716 |
| UQCR10     | 0.15  | 9.60  | 1.55  | 0.12716 |
| PIDD1      | 0.19  | 8.01  | 1.55  | 0.12718 |
| POLR2G     | 0.11  | 9.71  | 1.55  | 0.12735 |
| AC006504.5 | 0.11  | 6.70  | 1.55  | 0.12740 |
| YARS1      | 0.10  | 10.28 | 1.55  | 0.12742 |
| DNAJB6     | -0.11 | 9.82  | -1.55 | 0.12766 |
| DNAJC10    | -0.12 | 8.48  | -1.55 | 0.12767 |
| ANKRD40    | -0.13 | 8.15  | -1.55 | 0.12767 |
| EFNA3      | 0.26  | 5.71  | 1.55  | 0.12768 |
| SLFN12     | -0.17 | 6.18  | -1.55 | 0.12770 |
| SIRPB2     | -0.23 | 10.35 | -1.55 | 0.12774 |
| RACGAP1    | -0.15 | 6.72  | -1.55 | 0.12774 |
| AC010247.2 | 0.18  | 7.12  | 1.55  | 0.12775 |
| B3GNT2     | -0.22 | 7.36  | -1.55 | 0.12779 |
| NSMCE3     | 0.11  | 8.64  | 1.55  | 0.12786 |
| RNF217     | -0.17 | 5.23  | -1.55 | 0.12792 |

|                |       |       |       |         |
|----------------|-------|-------|-------|---------|
| PLBD1          | -0.22 | 10.90 | -1.55 | 0.12793 |
| GRASP          | 0.17  | 6.63  | 1.55  | 0.12794 |
| TYW1           | -0.11 | 7.51  | -1.55 | 0.12794 |
| NORAD          | -0.11 | 10.45 | -1.55 | 0.12799 |
| ZNF17          | -0.14 | 5.87  | -1.55 | 0.12808 |
| AL158823.1     | 0.26  | 7.04  | 1.55  | 0.12810 |
| SEPTIN11       | -0.13 | 7.81  | -1.55 | 0.12813 |
| WASL           | -0.15 | 6.02  | -1.55 | 0.12816 |
| AL034379.1     | 0.14  | 5.96  | 1.55  | 0.12818 |
| STX18          | 0.09  | 8.36  | 1.55  | 0.12819 |
| ZBTB40         | -0.17 | 9.06  | -1.55 | 0.12820 |
| GPRIN3         | -0.15 | 8.00  | -1.55 | 0.12825 |
| CDV3           | -0.09 | 10.74 | -1.55 | 0.12829 |
| IFI27L1        | 0.14  | 6.10  | 1.55  | 0.12829 |
| AL355388.1     | -0.21 | 5.70  | -1.55 | 0.12836 |
| BMX            | -0.34 | 6.28  | -1.55 | 0.12839 |
| SLC16A1-AS1    | 0.25  | 6.58  | 1.55  | 0.12844 |
| PLEKHA6        | 0.17  | 5.07  | 1.54  | 0.12845 |
| LRRC56         | 0.17  | 5.66  | 1.54  | 0.12848 |
| DDI2           | -0.10 | 8.19  | -1.54 | 0.12850 |
| MED30          | -0.12 | 7.33  | -1.54 | 0.12853 |
| CD72           | 0.31  | 8.44  | 1.54  | 0.12861 |
| HSPB1P1        | 0.17  | 5.58  | 1.54  | 0.12862 |
| SIRPAP1        | -0.33 | 6.11  | -1.54 | 0.12866 |
| ATP8B3         | -0.17 | 6.30  | -1.54 | 0.12867 |
| TTN-AS1        | -0.16 | 7.30  | -1.54 | 0.12876 |
| HES1           | 0.20  | 5.86  | 1.54  | 0.12879 |
| COG2           | 0.11  | 8.69  | 1.54  | 0.12880 |
| AC009118.3     | 0.15  | 5.19  | 1.54  | 0.12882 |
| MLYCD          | 0.09  | 8.34  | 1.54  | 0.12883 |
| MYO1E          | -0.19 | 7.13  | -1.54 | 0.12888 |
| AC027279.1     | 0.22  | 5.08  | 1.54  | 0.12893 |
| STIMATE-MUSTN1 | -0.22 | 5.10  | -1.54 | 0.12900 |
| HBQ1           | 0.36  | 7.74  | 1.54  | 0.12905 |
| AL645933.4     | -0.21 | 5.59  | -1.54 | 0.12910 |
| RMND5B         | 0.09  | 8.98  | 1.54  | 0.12921 |
| PPARA          | -0.12 | 7.32  | -1.54 | 0.12921 |
| AC104530.1     | 0.15  | 9.45  | 1.54  | 0.12921 |
| ZMYND19        | 0.12  | 7.54  | 1.54  | 0.12922 |
| PFKFB2         | -0.38 | 7.15  | -1.54 | 0.12924 |
| TSPYL2         | 0.16  | 9.12  | 1.54  | 0.12929 |
| DCUN1D1        | -0.17 | 7.78  | -1.54 | 0.12939 |
| ZNF701         | -0.12 | 7.26  | -1.54 | 0.12943 |
| IGHV2-70D      | 0.29  | 5.18  | 1.54  | 0.12954 |
| EXT1           | -0.14 | 7.90  | -1.54 | 0.12956 |
| AL445426.1     | -0.20 | 5.25  | -1.54 | 0.12980 |
| LINC01521      | 0.19  | 5.18  | 1.54  | 0.12982 |
| CMTM1          | -0.25 | 5.70  | -1.54 | 0.12983 |
| SWI5           | 0.15  | 7.80  | 1.54  | 0.12985 |
| UBR3           | -0.13 | 7.19  | -1.54 | 0.12986 |



|            |       |       |       |         |
|------------|-------|-------|-------|---------|
| ANO9       | 0.24  | 9.22  | 1.54  | 0.12989 |
| PEPD       | 0.13  | 9.56  | 1.54  | 0.12990 |
| IL23A      | 0.19  | 6.56  | 1.54  | 0.12996 |
| RPE        | -0.11 | 6.62  | -1.54 | 0.12997 |
| ADNP       | -0.11 | 9.80  | -1.54 | 0.12998 |
| MARCHF6    | -0.12 | 9.73  | -1.54 | 0.12998 |
| CIC        | 0.12  | 11.06 | 1.54  | 0.13004 |
| ZMIZ2      | 0.14  | 10.96 | 1.54  | 0.13006 |
| STXBP4     | -0.15 | 5.20  | -1.54 | 0.13007 |
| CHAC2      | -0.16 | 5.08  | -1.54 | 0.13013 |
| RBM12      | -0.10 | 9.08  | -1.54 | 0.13025 |
| ATP5MG     | 0.14  | 8.08  | 1.54  | 0.13047 |
| ZNF638     | -0.11 | 9.21  | -1.54 | 0.13048 |
| ISOC1      | -0.15 | 6.76  | -1.54 | 0.13057 |
| ANXA5      | -0.14 | 10.89 | -1.54 | 0.13062 |
| GALT       | 0.15  | 8.77  | 1.54  | 0.13070 |
| FCRLB      | 0.16  | 5.40  | 1.54  | 0.13072 |
| CNPY3      | 0.17  | 12.48 | 1.54  | 0.13075 |
| TBRG1      | -0.12 | 9.37  | -1.54 | 0.13075 |
| TRGV7      | -0.20 | 5.24  | -1.54 | 0.13079 |
| FAUP1      | 0.23  | 8.27  | 1.54  | 0.13085 |
| GALNT12    | 0.16  | 6.50  | 1.54  | 0.13087 |
| KIF11      | -0.18 | 5.35  | -1.53 | 0.13099 |
| CD96       | 0.14  | 9.97  | 1.53  | 0.13106 |
| MAN2A2     | -0.24 | 10.93 | -1.53 | 0.13118 |
| ZDHHC7     | -0.10 | 10.72 | -1.53 | 0.13122 |
| TMEM62     | -0.14 | 7.39  | -1.53 | 0.13130 |
| CMTM7      | 0.12  | 9.86  | 1.53  | 0.13140 |
| SGO1       | 0.21  | 5.19  | 1.53  | 0.13151 |
| N4BP1      | -0.14 | 10.74 | -1.53 | 0.13153 |
| SLC25A22   | 0.15  | 8.18  | 1.53  | 0.13169 |
| SUSD1      | -0.14 | 8.96  | -1.53 | 0.13171 |
| KRT10      | 0.15  | 7.30  | 1.53  | 0.13180 |
| KTI12      | 0.15  | 6.54  | 1.53  | 0.13183 |
| HNRNPCP4   | -0.13 | 5.37  | -1.53 | 0.13200 |
| ROM1       | 0.16  | 5.19  | 1.53  | 0.13201 |
| UTP6       | -0.10 | 8.98  | -1.53 | 0.13203 |
| TMEM165    | -0.16 | 8.45  | -1.53 | 0.13212 |
| NPLOC4     | 0.08  | 10.84 | 1.53  | 0.13219 |
| AC139530.3 | 0.15  | 5.04  | 1.53  | 0.13221 |
| CFL2       | -0.17 | 5.77  | -1.53 | 0.13226 |
| AC005632.3 | -0.18 | 6.18  | -1.53 | 0.13228 |
| COMT       | 0.14  | 9.80  | 1.53  | 0.13235 |
| PTDSS2     | 0.15  | 7.98  | 1.53  | 0.13237 |
| THAP12     | -0.13 | 8.42  | -1.53 | 0.13240 |
| RPSAP4     | 0.12  | 5.07  | 1.53  | 0.13249 |
| GSTP1      | 0.21  | 11.34 | 1.53  | 0.13250 |
| BBS7       | -0.13 | 5.73  | -1.53 | 0.13256 |
| BBS12      | -0.15 | 5.61  | -1.53 | 0.13258 |
| FKBP14     | -0.16 | 5.39  | -1.53 | 0.13266 |

|              |       |       |       |         |
|--------------|-------|-------|-------|---------|
| NLK          | -0.11 | 7.12  | -1.53 | 0.13271 |
| NF2          | 0.11  | 8.97  | 1.53  | 0.13271 |
| PLRG1        | -0.09 | 8.37  | -1.53 | 0.13273 |
| NAIP         | -0.28 | 7.54  | -1.53 | 0.13274 |
| SMAD2        | -0.10 | 9.06  | -1.53 | 0.13278 |
| NCOA7        | -0.16 | 7.57  | -1.53 | 0.13278 |
| S100A11P1    | -0.19 | 5.87  | -1.53 | 0.13283 |
| LINC01597    | 0.19  | 4.89  | 1.53  | 0.13290 |
| AC114778.2   | -0.23 | 5.44  | -1.53 | 0.13291 |
| NCKAP1       | -0.18 | 5.44  | -1.53 | 0.13293 |
| LGALS3       | 0.25  | 9.90  | 1.53  | 0.13296 |
| NHP2P1       | 0.15  | 5.47  | 1.53  | 0.13297 |
| AC100835.2   | 0.38  | 6.95  | 1.53  | 0.13300 |
| PGK1         | -0.12 | 12.18 | -1.53 | 0.13301 |
| FO538757.1   | -0.25 | 4.98  | -1.53 | 0.13317 |
| MYL6         | 0.17  | 12.95 | 1.53  | 0.13320 |
| MAP4K5       | -0.17 | 6.63  | -1.53 | 0.13324 |
| E2F3         | -0.21 | 8.28  | -1.53 | 0.13325 |
| MRVI1        | -0.32 | 9.62  | -1.53 | 0.13326 |
| NLRC5        | -0.17 | 11.78 | -1.52 | 0.13354 |
| TMEM51       | -0.27 | 5.63  | -1.52 | 0.13354 |
| SLC46A3      | -0.12 | 8.15  | -1.52 | 0.13356 |
| TIMELESS     | -0.14 | 7.54  | -1.52 | 0.13357 |
| NRM          | 0.19  | 8.89  | 1.52  | 0.13359 |
| DENND6A      | -0.14 | 7.31  | -1.52 | 0.13365 |
| STX4         | 0.11  | 10.26 | 1.52  | 0.13366 |
| VPS4A        | 0.13  | 8.92  | 1.52  | 0.13366 |
| LSP1P3       | 0.19  | 5.50  | 1.52  | 0.13378 |
| PPT1         | -0.20 | 11.00 | -1.52 | 0.13380 |
| GABARAPL1    | -0.19 | 9.75  | -1.52 | 0.13383 |
| TRAF3IP2-AS1 | -0.15 | 5.46  | -1.52 | 0.13385 |
| SNAPC4       | 0.12  | 8.21  | 1.52  | 0.13388 |
| ITPRIPL2     | -0.15 | 7.43  | -1.52 | 0.13392 |
| PTOV1        | 0.14  | 10.85 | 1.52  | 0.13396 |
| NEGR1        | 0.20  | 5.23  | 1.52  | 0.13400 |
| TRAV41       | -0.21 | 5.46  | -1.52 | 0.13403 |
| EIPR1        | 0.13  | 8.58  | 1.52  | 0.13412 |
| CD163        | -0.25 | 9.99  | -1.52 | 0.13413 |
| KCND1        | -0.19 | 6.68  | -1.52 | 0.13415 |
| CCDC25       | 0.13  | 8.05  | 1.52  | 0.13418 |
| ITGB4        | 0.28  | 6.32  | 1.52  | 0.13419 |
| PIP4K2C      | -0.09 | 8.88  | -1.52 | 0.13423 |
| HMBS         | 0.24  | 8.40  | 1.52  | 0.13431 |
| ROCK2        | -0.11 | 7.72  | -1.52 | 0.13431 |
| UQCRCF51     | 0.13  | 8.90  | 1.52  | 0.13433 |
| PTPN22       | -0.18 | 7.61  | -1.52 | 0.13447 |
| RPS4XP1      | 0.18  | 6.21  | 1.52  | 0.13453 |
| EEA1         | -0.14 | 6.16  | -1.52 | 0.13454 |
| NSD2         | -0.11 | 8.83  | -1.52 | 0.13455 |
| AL159141.1   | 0.12  | 12.41 | 1.52  | 0.13462 |

|            |       |       |       |         |
|------------|-------|-------|-------|---------|
| RIC3       | 0.22  | 6.44  | 1.52  | 0.13480 |
| LDB1       | 0.08  | 11.49 | 1.52  | 0.13481 |
| CTDSPL     | 0.25  | 7.98  | 1.52  | 0.13481 |
| TGIF2      | 0.10  | 8.83  | 1.52  | 0.13486 |
| NAP1L4     | 0.10  | 11.15 | 1.52  | 0.13494 |
| MRC2       | 0.32  | 7.71  | 1.52  | 0.13503 |
| ECE1-AS1   | -0.16 | 5.46  | -1.52 | 0.13507 |
| AC096667.1 | -0.16 | 6.47  | -1.52 | 0.13524 |
| KAT7       | -0.07 | 9.44  | -1.52 | 0.13529 |
| ZNF175     | -0.16 | 6.44  | -1.52 | 0.13529 |
| IL18BP     | 0.14  | 8.37  | 1.52  | 0.13530 |
| TLK2       | -0.11 | 8.52  | -1.52 | 0.13535 |
| ANKRD27    | -0.08 | 8.65  | -1.52 | 0.13535 |
| GART       | -0.11 | 8.63  | -1.52 | 0.13541 |
| AC074019.1 | -0.15 | 4.96  | -1.52 | 0.13545 |
| ASB6       | 0.08  | 9.08  | 1.52  | 0.13562 |
| GRK6       | 0.11  | 12.51 | 1.52  | 0.13564 |
| SBDSP1     | -0.17 | 6.59  | -1.52 | 0.13566 |
| TRIM66     | -0.21 | 7.72  | -1.52 | 0.13566 |
| LRP8       | -0.17 | 6.45  | -1.52 | 0.13573 |
| RPL10P2    | 0.15  | 5.32  | 1.51  | 0.13588 |
| SPATA13    | -0.18 | 9.28  | -1.51 | 0.13591 |
| GPN2       | 0.10  | 8.81  | 1.51  | 0.13619 |
| SIGLEC16   | -0.19 | 5.86  | -1.51 | 0.13620 |
| UCHL5      | -0.12 | 7.22  | -1.51 | 0.13621 |
| UFD1       | 0.09  | 9.42  | 1.51  | 0.13624 |
| RPL22P1    | 0.23  | 8.84  | 1.51  | 0.13627 |
| ZNF783     | 0.11  | 8.42  | 1.51  | 0.13631 |
| XRCC5      | -0.09 | 11.24 | -1.51 | 0.13633 |
| OSBPL9     | -0.17 | 8.03  | -1.51 | 0.13636 |
| RBM38      | 0.31  | 12.31 | 1.51  | 0.13636 |
| STXBP5-AS1 | -0.18 | 5.40  | -1.51 | 0.13637 |
| MTMR1      | -0.14 | 9.01  | -1.51 | 0.13640 |
| RPL27AP5   | 0.14  | 5.11  | 1.51  | 0.13640 |
| RPS4XP22   | -0.40 | 5.50  | -1.51 | 0.13646 |
| CNOT7      | -0.11 | 8.41  | -1.51 | 0.13649 |
| C2         | -0.25 | 5.44  | -1.51 | 0.13651 |
| TAF4       | -0.13 | 8.16  | -1.51 | 0.13653 |
| SLC38A1    | -0.19 | 9.14  | -1.51 | 0.13663 |
| ZNF136     | -0.14 | 6.86  | -1.51 | 0.13666 |
| RUVBL1     | 0.13  | 9.05  | 1.51  | 0.13667 |
| IGHV4-4    | 0.36  | 6.66  | 1.51  | 0.13667 |
| TRBV18     | 0.19  | 6.42  | 1.51  | 0.13668 |
| DNAJC2     | 0.24  | 8.95  | 1.51  | 0.13671 |
| LRRC8D     | -0.12 | 8.46  | -1.51 | 0.13672 |
| XIAP       | 0.14  | 9.44  | 1.51  | 0.13675 |
| MERTK      | -0.23 | 6.06  | -1.51 | 0.13676 |
| ALOX5      | -0.22 | 12.56 | -1.51 | 0.13694 |
| NEU3       | -0.11 | 7.47  | -1.51 | 0.13699 |
| BHLHE41    | -0.19 | 5.19  | -1.51 | 0.13701 |

|            |       |       |       |         |
|------------|-------|-------|-------|---------|
| TRAV1-2    | 0.16  | 6.03  | 1.51  | 0.13704 |
| TM2D3      | -0.08 | 8.93  | -1.51 | 0.13708 |
| CASP8AP2   | -0.19 | 6.84  | -1.51 | 0.13714 |
| ZNF480     | 0.11  | 7.50  | 1.51  | 0.13717 |
| GPT2       | 0.18  | 6.20  | 1.51  | 0.13735 |
| PGM2       | -0.16 | 7.96  | -1.51 | 0.13746 |
| AL355472.1 | 0.18  | 6.73  | 1.51  | 0.13746 |
| AL391988.1 | 0.18  | 5.16  | 1.51  | 0.13747 |
| RPL7AP30   | 0.21  | 7.58  | 1.51  | 0.13748 |
| AC020915.3 | 0.17  | 5.79  | 1.51  | 0.13754 |
| CAT        | -0.18 | 11.02 | -1.51 | 0.13755 |
| SLC35F6    | 0.12  | 9.15  | 1.51  | 0.13757 |
| ALS2       | -0.13 | 6.90  | -1.51 | 0.13758 |
| LINC01002  | -0.33 | 7.96  | -1.51 | 0.13762 |
| RPS27P29   | 0.14  | 5.45  | 1.51  | 0.13769 |
| DOCK10     | -0.16 | 9.77  | -1.51 | 0.13771 |
| RPL31P49   | 0.24  | 7.07  | 1.51  | 0.13771 |
| LINC02611  | 0.14  | 6.13  | 1.51  | 0.13772 |
| ITPA       | 0.14  | 8.65  | 1.51  | 0.13775 |
| CCDC77     | -0.12 | 6.94  | -1.51 | 0.13776 |
| DEDD       | -0.09 | 9.50  | -1.51 | 0.13779 |
| DPP3       | 0.10  | 8.81  | 1.51  | 0.13810 |
| AOAH       | -0.15 | 11.63 | -1.51 | 0.13810 |
| GAS5       | 0.16  | 9.74  | 1.51  | 0.13811 |
| PUS7       | -0.15 | 5.23  | -1.51 | 0.13813 |
| STK19      | 0.12  | 7.60  | 1.51  | 0.13815 |
| VPS53      | 0.11  | 9.62  | 1.51  | 0.13815 |
| MFSD14C    | -0.13 | 7.89  | -1.51 | 0.13819 |
| TSSK6      | 0.15  | 6.27  | 1.51  | 0.13827 |
| VIPR2      | -0.18 | 5.11  | -1.51 | 0.13832 |
| C1orf50    | 0.15  | 5.50  | 1.50  | 0.13847 |
| F8         | -0.16 | 5.83  | -1.50 | 0.13849 |
| GNL3L      | 0.18  | 9.33  | 1.50  | 0.13852 |
| TNFAIP8L2  | 0.12  | 10.37 | 1.50  | 0.13865 |
| ATP2B1     | -0.11 | 9.29  | -1.50 | 0.13866 |
| EMP3       | 0.18  | 12.55 | 1.50  | 0.13866 |
| ARF4       | -0.11 | 8.99  | -1.50 | 0.13870 |
| TGFBRAP1   | -0.12 | 8.34  | -1.50 | 0.13871 |
| FAM210B    | 0.34  | 12.10 | 1.50  | 0.13872 |
| CRBN       | -0.12 | 8.30  | -1.50 | 0.13886 |
| SLC27A5    | 0.16  | 6.24  | 1.50  | 0.13887 |
| POLR2J4    | 0.12  | 7.25  | 1.50  | 0.13888 |
| TOR2A      | 0.13  | 8.99  | 1.50  | 0.13890 |
| SRPK2      | -0.11 | 9.29  | -1.50 | 0.13904 |
| SNHG11     | 0.15  | 6.56  | 1.50  | 0.13905 |
| DMWD       | 0.12  | 7.91  | 1.50  | 0.13915 |
| EDC3       | 0.10  | 8.91  | 1.50  | 0.13926 |
| PSMC4      | 0.10  | 10.11 | 1.50  | 0.13935 |
| STX7       | -0.15 | 9.43  | -1.50 | 0.13945 |
| PUDP       | 0.16  | 7.78  | 1.50  | 0.13954 |

|            |       |       |       |         |
|------------|-------|-------|-------|---------|
| RPL12P1    | 0.13  | 5.27  | 1.50  | 0.13957 |
| RPL19P16   | 0.14  | 5.52  | 1.50  | 0.13963 |
| AC093151.5 | -0.24 | 5.69  | -1.50 | 0.13966 |
| SNHG9      | 0.19  | 6.64  | 1.50  | 0.13968 |
| RPL10P12   | 0.19  | 6.97  | 1.50  | 0.13969 |
| ZNF844     | 0.16  | 6.79  | 1.50  | 0.13973 |
| POLH       | 0.17  | 8.08  | 1.50  | 0.13977 |
| LY75       | -0.14 | 7.79  | -1.50 | 0.13980 |
| RPL34P27   | 0.19  | 6.54  | 1.50  | 0.13983 |
| RPS3A      | 0.20  | 12.23 | 1.50  | 0.13984 |
| ACOX1      | -0.17 | 10.13 | -1.50 | 0.13988 |
| RPL10P16   | 0.23  | 9.89  | 1.50  | 0.14008 |
| AC117382.1 | -0.16 | 5.47  | -1.50 | 0.14011 |
| ZEB1       | -0.16 | 6.98  | -1.50 | 0.14015 |
| NUBP1      | 0.14  | 8.94  | 1.50  | 0.14019 |
| SLC25A44   | -0.18 | 9.87  | -1.50 | 0.14020 |
| MICALL1    | 0.11  | 9.04  | 1.50  | 0.14030 |
| KIF27      | -0.26 | 6.04  | -1.50 | 0.14033 |
| SLC4A10    | -0.25 | 5.16  | -1.50 | 0.14034 |
| STXBP2     | 0.17  | 11.51 | 1.50  | 0.14041 |
| AC079331.2 | 0.21  | 5.71  | 1.50  | 0.14044 |
| ME2        | -0.10 | 9.08  | -1.50 | 0.14049 |
| AC044787.1 | 0.20  | 7.31  | 1.50  | 0.14055 |
| PPP1R35    | 0.14  | 9.21  | 1.50  | 0.14056 |
| AC010326.5 | 0.20  | 7.29  | 1.50  | 0.14064 |
| XYLT1      | -0.17 | 8.34  | -1.50 | 0.14070 |
| NOTCH1     | -0.20 | 11.91 | -1.50 | 0.14073 |
| MYO6       | -0.20 | 5.99  | -1.50 | 0.14073 |
| PTEN       | -0.19 | 10.71 | -1.50 | 0.14074 |
| GSTZ1      | 0.15  | 7.30  | 1.50  | 0.14074 |
| GOLGB1     | -0.09 | 9.75  | -1.50 | 0.14077 |
| SESN2      | 0.14  | 8.64  | 1.50  | 0.14081 |
| CIAPIN1    | 0.11  | 9.24  | 1.50  | 0.14085 |
| PGAP6      | 0.14  | 11.11 | 1.50  | 0.14085 |
| HID1       | 0.20  | 6.26  | 1.50  | 0.14086 |
| SMIM29     | 0.14  | 8.92  | 1.50  | 0.14086 |
| PCBP1-AS1  | -0.17 | 9.08  | -1.50 | 0.14087 |
| EIF4A1     | -0.21 | 5.65  | -1.50 | 0.14094 |
| SNRPE      | 0.16  | 7.55  | 1.50  | 0.14097 |
| SMAD4      | -0.09 | 8.97  | -1.49 | 0.14101 |
| DACH1      | -0.21 | 5.30  | -1.49 | 0.14102 |
| AKAP8      | -0.10 | 8.72  | -1.49 | 0.14114 |
| NAPRT      | 0.17  | 9.00  | 1.49  | 0.14114 |
| SFXN2      | 0.15  | 6.43  | 1.49  | 0.14115 |
| AC116049.1 | -0.26 | 6.59  | -1.49 | 0.14117 |
| RHBDD3     | 0.12  | 6.65  | 1.49  | 0.14130 |
| FAM86DP    | 0.16  | 6.56  | 1.49  | 0.14140 |
| C12orf45   | 0.16  | 7.35  | 1.49  | 0.14141 |
| ZDHHC4     | 0.14  | 8.36  | 1.49  | 0.14149 |
| EOGT       | -0.15 | 5.75  | -1.49 | 0.14153 |

|            |       |       |       |         |
|------------|-------|-------|-------|---------|
| MKS1       | 0.13  | 7.36  | 1.49  | 0.14158 |
| VPS72      | 0.10  | 9.26  | 1.49  | 0.14161 |
| EPAS1      | -0.17 | 5.87  | -1.49 | 0.14170 |
| AASDHPPT   | -0.13 | 7.22  | -1.49 | 0.14178 |
| AC104695.3 | -0.18 | 5.63  | -1.49 | 0.14188 |
| BRCA2      | -0.17 | 5.12  | -1.49 | 0.14189 |
| RPL11P5    | 0.23  | 7.14  | 1.49  | 0.14190 |
| C22orf46   | 0.13  | 7.59  | 1.49  | 0.14195 |
| YY1        | 0.08  | 10.79 | 1.49  | 0.14197 |
| MITD1      | -0.12 | 7.80  | -1.49 | 0.14203 |
| MFG8       | 0.16  | 7.71  | 1.49  | 0.14217 |
| PRR12      | 0.12  | 9.70  | 1.49  | 0.14226 |
| ZNF83      | -0.18 | 7.56  | -1.49 | 0.14227 |
| ITM2C      | 0.23  | 9.80  | 1.49  | 0.14229 |
| AP003733.3 | 0.23  | 5.48  | 1.49  | 0.14229 |
| SLX4IP     | -0.15 | 6.17  | -1.49 | 0.14244 |
| RANGRF     | 0.14  | 8.64  | 1.49  | 0.14253 |
| THAP5      | -0.14 | 7.13  | -1.49 | 0.14253 |
| PLEKHA8    | -0.15 | 6.29  | -1.49 | 0.14264 |
| MDN1       | -0.15 | 8.62  | -1.49 | 0.14280 |
| TMTC2      | -0.14 | 6.16  | -1.49 | 0.14281 |
| ZNF654     | -0.16 | 6.26  | -1.49 | 0.14302 |
| AC002456.1 | -0.16 | 4.96  | -1.49 | 0.14307 |
| PI4KAP2    | -0.21 | 7.23  | -1.49 | 0.14311 |
| BBIP1      | -0.15 | 7.63  | -1.49 | 0.14311 |
| MAPKAPK5   | -0.08 | 8.15  | -1.49 | 0.14324 |
| GAB3       | -0.13 | 9.41  | -1.49 | 0.14324 |
| ARHGEF7    | -0.09 | 9.15  | -1.49 | 0.14326 |
| FEM1A      | 0.08  | 9.52  | 1.49  | 0.14328 |
| RPL7AP6    | 0.22  | 9.23  | 1.49  | 0.14337 |
| ACVR2A     | -0.13 | 6.38  | -1.49 | 0.14342 |
| RHOT2      | 0.15  | 10.63 | 1.49  | 0.14345 |
| TRBV5-6    | 0.19  | 6.63  | 1.49  | 0.14351 |
| RPSAP9     | 0.14  | 5.84  | 1.48  | 0.14362 |
| LINC01011  | 0.13  | 6.71  | 1.48  | 0.14363 |
| ATRX       | 0.19  | 9.44  | 1.48  | 0.14368 |
| ZNF236-DT  | 0.20  | 5.35  | 1.48  | 0.14373 |
| AGO2       | -0.16 | 9.63  | -1.48 | 0.14378 |
| LAIR2      | 0.38  | 6.14  | 1.48  | 0.14382 |
| AC092053.6 | -0.21 | 5.52  | -1.48 | 0.14382 |
| HBG2       | 0.76  | 7.34  | 1.48  | 0.14383 |
| AC009245.1 | 0.19  | 7.97  | 1.48  | 0.14383 |
| RPS23P1    | 0.19  | 5.72  | 1.48  | 0.14389 |
| CDC23      | -0.12 | 7.49  | -1.48 | 0.14389 |
| EXOSC7     | 0.14  | 7.98  | 1.48  | 0.14391 |
| CCDC88A    | 0.19  | 8.71  | 1.48  | 0.14393 |
| LINC01006  | -0.17 | 5.42  | -1.48 | 0.14405 |
| PRRC2C     | 0.20  | 11.50 | 1.48  | 0.14411 |
| PDLIM2     | 0.09  | 10.01 | 1.48  | 0.14421 |
| TYSND1     | 0.12  | 8.67  | 1.48  | 0.14425 |

|            |       |       |       |         |
|------------|-------|-------|-------|---------|
| ALOX12     | 0.24  | 7.71  | 1.48  | 0.14431 |
| BCLAF1P2   | -0.19 | 5.30  | -1.48 | 0.14432 |
| NMD3       | -0.13 | 7.16  | -1.48 | 0.14436 |
| AL359762.1 | -0.24 | 6.54  | -1.48 | 0.14444 |
| ZADH2      | -0.10 | 8.30  | -1.48 | 0.14447 |
| AC084871.1 | 0.27  | 5.37  | 1.48  | 0.14448 |
| GBA2       | -0.11 | 10.18 | -1.48 | 0.14449 |
| DEPTOR     | 0.16  | 4.99  | 1.48  | 0.14466 |
| BORCS5     | 0.10  | 7.25  | 1.48  | 0.14476 |
| MTF1       | -0.12 | 8.76  | -1.48 | 0.14477 |
| PTMA       | 0.12  | 12.89 | 1.48  | 0.14482 |
| APTX       | 0.09  | 7.77  | 1.48  | 0.14501 |
| MRPS36     | 0.14  | 7.16  | 1.48  | 0.14502 |
| SLC38A10   | 0.11  | 10.90 | 1.48  | 0.14505 |
| SIRT5      | -0.13 | 7.57  | -1.48 | 0.14518 |
| TRBV7-2    | 0.26  | 8.34  | 1.48  | 0.14537 |
| ZNF577     | -0.17 | 5.98  | -1.48 | 0.14542 |
| SMPDL3A    | -0.13 | 5.89  | -1.48 | 0.14546 |
| SNRK-AS1   | -0.18 | 5.09  | -1.48 | 0.14553 |
| RPL11P3    | 0.21  | 8.52  | 1.48  | 0.14559 |
| MAST2      | 0.12  | 8.15  | 1.48  | 0.14571 |
| AKAP12     | -0.22 | 5.44  | -1.48 | 0.14572 |
| LINC-PINT  | 0.24  | 6.87  | 1.48  | 0.14574 |
| AC107375.1 | 0.18  | 5.85  | 1.48  | 0.14580 |
| TXNIP      | -0.13 | 15.08 | -1.48 | 0.14580 |
| AC092597.1 | 0.14  | 6.38  | 1.48  | 0.14584 |
| GRK4       | -0.18 | 5.19  | -1.48 | 0.14592 |
| MASTL      | -0.16 | 5.90  | -1.48 | 0.14606 |
| NKTR       | -0.18 | 9.34  | -1.48 | 0.14607 |
| NOL9       | 0.15  | 8.32  | 1.48  | 0.14610 |
| HYI        | 0.15  | 7.19  | 1.48  | 0.14612 |
| GTF2H3     | 0.12  | 7.43  | 1.48  | 0.14615 |
| OSBPL8     | -0.21 | 8.66  | -1.48 | 0.14617 |
| RPL23AP18  | 0.12  | 5.25  | 1.47  | 0.14641 |
| ADA2       | -0.14 | 12.02 | -1.47 | 0.14644 |
| RBM3       | 0.10  | 10.93 | 1.47  | 0.14645 |
| ZZEF1      | -0.10 | 10.98 | -1.47 | 0.14646 |
| C11orf24   | 0.14  | 8.33  | 1.47  | 0.14650 |
| MEG3       | -0.40 | 5.95  | -1.47 | 0.14651 |
| SLC25A11   | 0.11  | 10.13 | 1.47  | 0.14662 |
| KLF5       | -0.22 | 5.48  | -1.47 | 0.14666 |
| ZNF37BP    | -0.18 | 7.16  | -1.47 | 0.14666 |
| FAM78A     | 0.09  | 11.62 | 1.47  | 0.14666 |
| COX7CP1    | 0.20  | 6.32  | 1.47  | 0.14668 |
| SRSF10     | -0.10 | 8.52  | -1.47 | 0.14689 |
| WDR54      | 0.15  | 8.13  | 1.47  | 0.14692 |
| MRPS18C    | 0.12  | 7.09  | 1.47  | 0.14697 |
| VWA8       | -0.18 | 6.69  | -1.47 | 0.14700 |
| COQ8A      | 0.11  | 10.47 | 1.47  | 0.14705 |
| EVI2A      | -0.13 | 8.95  | -1.47 | 0.14717 |

|            |       |       |       |         |
|------------|-------|-------|-------|---------|
| GOLIM4     | -0.18 | 6.13  | -1.47 | 0.14720 |
| AC097382.3 | 0.14  | 6.70  | 1.47  | 0.14721 |
| ZNHIT3     | 0.10  | 8.47  | 1.47  | 0.14734 |
| AGPAT2     | 0.16  | 9.19  | 1.47  | 0.14736 |
| LIMD1      | -0.13 | 8.63  | -1.47 | 0.14742 |
| CD99L2     | 0.09  | 9.40  | 1.47  | 0.14752 |
| SLC35C1    | 0.11  | 8.91  | 1.47  | 0.14753 |
| CCDC15     | 0.15  | 5.48  | 1.47  | 0.14756 |
| PLD4       | 0.24  | 9.03  | 1.47  | 0.14768 |
| NAPSA      | 0.17  | 5.61  | 1.47  | 0.14769 |
| TOP2B      | -0.12 | 9.96  | -1.47 | 0.14777 |
| ZNF672     | 0.10  | 9.74  | 1.47  | 0.14780 |
| PIK3CDP1   | -0.21 | 5.90  | -1.47 | 0.14781 |
| FOXRED1    | 0.12  | 8.25  | 1.47  | 0.14792 |
| IRF9       | -0.23 | 8.08  | -1.47 | 0.14793 |
| GCNT2      | -0.21 | 6.49  | -1.47 | 0.14800 |
| TCAF2      | -0.16 | 6.73  | -1.47 | 0.14804 |
| RNF19B     | -0.15 | 10.67 | -1.47 | 0.14811 |
| NVL        | 0.10  | 7.95  | 1.47  | 0.14822 |
| C8orf76    | 0.13  | 6.29  | 1.47  | 0.14825 |
| HCAR2      | -0.32 | 10.00 | -1.47 | 0.14837 |
| AC005842.1 | 0.21  | 6.74  | 1.47  | 0.14847 |
| PRICKLE1   | -0.24 | 5.88  | -1.47 | 0.14849 |
| AC009005.1 | -0.20 | 5.64  | -1.47 | 0.14849 |
| SGMS2      | -0.17 | 6.05  | -1.47 | 0.14850 |
| MFSD3      | 0.17  | 6.39  | 1.47  | 0.14852 |
| AC010969.2 | 0.13  | 6.48  | 1.47  | 0.14863 |
| H2AC20     | 0.15  | 5.19  | 1.47  | 0.14865 |
| CMTM5      | 0.30  | 7.64  | 1.47  | 0.14866 |
| AL359263.1 | -0.19 | 5.23  | -1.47 | 0.14866 |
| ZFP62      | -0.13 | 7.25  | -1.47 | 0.14870 |
| HMGB3      | -0.18 | 5.34  | -1.47 | 0.14870 |
| LZTFL1     | -0.15 | 6.19  | -1.47 | 0.14875 |
| NDUFB2     | 0.15  | 9.21  | 1.47  | 0.14877 |
| GRB10      | -0.32 | 7.21  | -1.47 | 0.14879 |
| ECM1       | 0.18  | 5.36  | 1.47  | 0.14884 |
| COX10      | 0.12  | 7.36  | 1.47  | 0.14897 |
| SEM1       | 0.15  | 8.43  | 1.46  | 0.14901 |
| PHC1       | -0.16 | 6.87  | -1.46 | 0.14909 |
| CCDC14     | -0.17 | 6.64  | -1.46 | 0.14911 |
| CYB5RL     | -0.10 | 6.31  | -1.46 | 0.14915 |
| SRSF1      | -0.12 | 7.84  | -1.46 | 0.14915 |
| CBX7       | 0.10  | 10.80 | 1.46  | 0.14927 |
| ELMOD2     | -0.14 | 6.88  | -1.46 | 0.14936 |
| PMM1       | 0.13  | 8.64  | 1.46  | 0.14938 |
| LINC02723  | -0.19 | 6.77  | -1.46 | 0.14941 |
| PDPR       | -0.16 | 9.32  | -1.46 | 0.14956 |
| DBR1       | -0.13 | 7.04  | -1.46 | 0.14957 |
| GHDC       | 0.12  | 9.02  | 1.46  | 0.14964 |
| ZNF287     | 0.17  | 5.98  | 1.46  | 0.14972 |



|            |       |       |       |         |
|------------|-------|-------|-------|---------|
| TNFAIP2    | -0.19 | 12.95 | -1.46 | 0.14978 |
| UBE2J1     | -0.18 | 9.53  | -1.46 | 0.14982 |
| AL512599.1 | 0.23  | 7.12  | 1.46  | 0.14986 |
| SUPT16HP1  | -0.18 | 5.88  | -1.46 | 0.14989 |
| MRPL39     | 0.12  | 7.01  | 1.46  | 0.14990 |
| ERLEC1     | -0.12 | 7.95  | -1.46 | 0.15009 |
| COQ8B      | 0.12  | 9.06  | 1.46  | 0.15021 |
| AC117409.1 | 0.16  | 5.36  | 1.46  | 0.15023 |
| C16orf58   | 0.10  | 9.45  | 1.46  | 0.15026 |
| PDE9A      | 0.21  | 6.38  | 1.46  | 0.15028 |
| KCTD6      | -0.09 | 6.69  | -1.46 | 0.15033 |
| CTBS       | -0.21 | 8.07  | -1.46 | 0.15035 |
| ZNF587     | -0.23 | 6.84  | -1.46 | 0.15038 |
| TAPBP      | 0.12  | 13.06 | 1.46  | 0.15039 |
| EFCAB7     | -0.16 | 5.22  | -1.46 | 0.15044 |
| TUBG2      | 0.16  | 6.89  | 1.46  | 0.15058 |
| SRSF2      | -0.09 | 10.05 | -1.46 | 0.15070 |
| TPX2       | -0.15 | 5.74  | -1.46 | 0.15072 |
| PLD3       | 0.14  | 11.10 | 1.46  | 0.15076 |
| AC138969.3 | 0.25  | 5.29  | 1.46  | 0.15084 |
| CD38       | -0.21 | 7.32  | -1.46 | 0.15097 |
| COPZ1      | 0.11  | 10.58 | 1.46  | 0.15099 |
| SLC22A5    | -0.17 | 6.10  | -1.46 | 0.15112 |
| TRAF7      | 0.09  | 10.35 | 1.46  | 0.15116 |
| GPBP1      | -0.09 | 10.00 | -1.46 | 0.15130 |
| MTRES1     | 0.13  | 6.49  | 1.46  | 0.15131 |
| ADAM28     | -0.18 | 7.44  | -1.46 | 0.15135 |
| AC115223.1 | 0.21  | 9.10  | 1.46  | 0.15139 |
| RPP40      | 0.14  | 5.43  | 1.46  | 0.15151 |
| RNF40      | 0.09  | 11.20 | 1.46  | 0.15158 |
| NDUFAF2    | 0.16  | 6.61  | 1.46  | 0.15166 |
| UTS2       | -0.29 | 5.21  | -1.45 | 0.15172 |
| SIDT1      | -0.13 | 8.53  | -1.45 | 0.15173 |
| STX2       | -0.16 | 6.93  | -1.45 | 0.15185 |
| FNBP4      | -0.14 | 9.05  | -1.45 | 0.15192 |
| NDUFA1     | 0.15  | 9.58  | 1.45  | 0.15197 |
| RNF122     | -0.11 | 8.62  | -1.45 | 0.15199 |
| IGKJ1      | 0.25  | 6.11  | 1.45  | 0.15201 |
| AC131206.1 | 0.16  | 5.11  | 1.45  | 0.15203 |
| PMPCA      | 0.09  | 9.43  | 1.45  | 0.15204 |
| GLG1       | 0.07  | 11.90 | 1.45  | 0.15204 |
| RTP4       | -0.23 | 7.50  | -1.45 | 0.15205 |
| B4GALNT4   | -0.22 | 5.13  | -1.45 | 0.15209 |
| ENTPD2     | -0.28 | 5.75  | -1.45 | 0.15212 |
| CHFR       | -0.10 | 9.62  | -1.45 | 0.15214 |
| ZGRF1      | -0.15 | 5.57  | -1.45 | 0.15216 |
| AMZ2P1     | -0.14 | 6.93  | -1.45 | 0.15216 |
| HNRNPA1P50 | 0.12  | 5.05  | 1.45  | 0.15218 |
| RPL12P38   | 0.13  | 6.26  | 1.45  | 0.15221 |
| SFT2D2     | -0.11 | 9.43  | -1.45 | 0.15221 |

|            |       |       |       |         |
|------------|-------|-------|-------|---------|
| POMT1      | 0.12  | 8.63  | 1.45  | 0.15226 |
| SNX17      | 0.12  | 11.62 | 1.45  | 0.15240 |
| CRACR2B    | 0.20  | 6.35  | 1.45  | 0.15247 |
| CAND1      | -0.11 | 8.73  | -1.45 | 0.15261 |
| ELK1       | 0.09  | 8.22  | 1.45  | 0.15265 |
| NEAT1      | 0.27  | 13.62 | 1.45  | 0.15268 |
| PHF12      | -0.14 | 10.84 | -1.45 | 0.15275 |
| KLHL15     | -0.15 | 5.94  | -1.45 | 0.15276 |
| UFC1       | 0.13  | 10.03 | 1.45  | 0.15288 |
| PLAA       | -0.10 | 7.60  | -1.45 | 0.15296 |
| TIMM29     | 0.10  | 7.73  | 1.45  | 0.15297 |
| LINC01963  | 0.11  | 7.19  | 1.45  | 0.15307 |
| ABHD17A    | 0.15  | 11.16 | 1.45  | 0.15309 |
| RFC3       | -0.17 | 5.70  | -1.45 | 0.15314 |
| P4HB       | 0.12  | 12.50 | 1.45  | 0.15317 |
| AC009404.1 | 0.16  | 5.51  | 1.45  | 0.15319 |
| AC004941.2 | -0.18 | 5.31  | -1.45 | 0.15367 |
| FOXJ2      | -0.10 | 8.88  | -1.45 | 0.15368 |
| CREM       | 0.15  | 6.79  | 1.45  | 0.15384 |
| UBR5-AS1   | -0.19 | 7.11  | -1.45 | 0.15388 |
| AC131009.4 | 0.28  | 6.04  | 1.45  | 0.15391 |
| SRP19      | 0.11  | 6.80  | 1.45  | 0.15397 |
| CATSPER1   | 0.18  | 7.41  | 1.45  | 0.15398 |
| SLC35D1    | -0.13 | 7.09  | -1.45 | 0.15400 |
| SAMSN1     | -0.22 | 8.21  | -1.45 | 0.15405 |
| TYW1B      | -0.20 | 5.83  | -1.45 | 0.15416 |
| MCM7       | 0.09  | 10.44 | 1.45  | 0.15421 |
| IKBKE      | 0.13  | 9.91  | 1.45  | 0.15424 |
| IGHM       | 0.22  | 14.01 | 1.45  | 0.15428 |
| C15orf40   | 0.09  | 7.93  | 1.45  | 0.15431 |
| RPS21P4    | 0.21  | 6.62  | 1.45  | 0.15433 |
| ERHP1      | -0.14 | 5.15  | -1.45 | 0.15438 |
| SPSB2      | 0.17  | 7.62  | 1.45  | 0.15438 |
| MRPS17     | 0.15  | 6.09  | 1.45  | 0.15446 |
| RPS20P14   | 0.22  | 8.37  | 1.44  | 0.15458 |
| TLR5       | -0.27 | 7.85  | -1.44 | 0.15473 |
| ZC3H6      | 0.25  | 9.20  | 1.44  | 0.15485 |
| FAHD2B     | 0.13  | 6.41  | 1.44  | 0.15485 |
| RAD23BP1   | -0.17 | 5.16  | -1.44 | 0.15488 |
| SEMA3C     | -0.18 | 5.28  | -1.44 | 0.15492 |
| HIVEP2     | -0.16 | 9.06  | -1.44 | 0.15493 |
| CENPP      | 0.16  | 5.65  | 1.44  | 0.15493 |
| CDC73      | -0.13 | 7.71  | -1.44 | 0.15496 |
| EBF1       | 0.21  | 5.92  | 1.44  | 0.15513 |
| ANKIB1     | -0.16 | 7.18  | -1.44 | 0.15513 |
| RPL7P23    | 0.16  | 6.59  | 1.44  | 0.15513 |
| AL596275.1 | 0.11  | 5.44  | 1.44  | 0.15516 |
| LINC01184  | 0.15  | 7.32  | 1.44  | 0.15522 |
| CMSS1      | 0.16  | 6.79  | 1.44  | 0.15534 |
| ANKRA2     | -0.11 | 6.93  | -1.44 | 0.15555 |

|            |       |       |       |         |
|------------|-------|-------|-------|---------|
| TRUB2      | 0.12  | 8.25  | 1.44  | 0.15556 |
| ILK        | 0.11  | 11.37 | 1.44  | 0.15557 |
| BST1       | -0.19 | 10.14 | -1.44 | 0.15558 |
| TSEN2      | 0.15  | 6.34  | 1.44  | 0.15573 |
| ACTN1      | -0.19 | 12.61 | -1.44 | 0.15579 |
| TUBB1      | -0.25 | 10.49 | -1.44 | 0.15587 |
| BRD4       | 0.11  | 11.77 | 1.44  | 0.15588 |
| MFSD2A     | -0.18 | 6.60  | -1.44 | 0.15598 |
| GLYCK      | 0.12  | 8.12  | 1.44  | 0.15599 |
| AMPD3      | -0.16 | 8.82  | -1.44 | 0.15600 |
| HMGCS1     | -0.11 | 7.41  | -1.44 | 0.15601 |
| AC092279.2 | -0.27 | 6.41  | -1.44 | 0.15611 |
| RPS4XP8    | 0.15  | 5.27  | 1.44  | 0.15611 |
| HCN2       | 0.15  | 5.88  | 1.44  | 0.15614 |
| TRAIP      | 0.13  | 5.63  | 1.44  | 0.15616 |
| CYP4F12    | 0.22  | 6.50  | 1.44  | 0.15623 |
| CDC25B     | 0.13  | 11.56 | 1.44  | 0.15629 |
| SPATS2L    | -0.30 | 7.02  | -1.44 | 0.15650 |
| H3-3A      | -0.23 | 10.25 | -1.44 | 0.15650 |
| CREB3L2    | -0.09 | 8.50  | -1.44 | 0.15655 |
| VANGL1     | -0.14 | 6.17  | -1.44 | 0.15656 |
| DOC2B      | -0.24 | 5.05  | -1.44 | 0.15676 |
| AL353678.1 | 0.24  | 7.18  | 1.44  | 0.15691 |
| ZNF580     | 0.13  | 8.51  | 1.44  | 0.15692 |
| MRPS27     | 0.09  | 8.86  | 1.44  | 0.15698 |
| ATL1       | -0.15 | 5.12  | -1.44 | 0.15698 |
| AC021016.1 | 0.17  | 5.81  | 1.44  | 0.15704 |
| RN7SL172P  | 0.23  | 5.36  | 1.44  | 0.15708 |
| AL358176.3 | 0.15  | 5.11  | 1.44  | 0.15715 |
| MAP7D3     | 0.12  | 7.19  | 1.44  | 0.15720 |
| POLR2C     | 0.09  | 10.08 | 1.44  | 0.15721 |
| PBX4       | 0.15  | 7.02  | 1.44  | 0.15722 |
| SNHG32     | 0.15  | 7.65  | 1.43  | 0.15731 |
| ITGAD      | -0.21 | 6.01  | -1.43 | 0.15737 |
| TECRP2     | 0.15  | 5.37  | 1.43  | 0.15742 |
| GSTK1      | 0.11  | 11.98 | 1.43  | 0.15742 |
| AGBL5      | 0.10  | 7.77  | 1.43  | 0.15744 |
| IGHV1-69   | 0.32  | 6.49  | 1.43  | 0.15744 |
| ARHGAP31   | -0.13 | 8.02  | -1.43 | 0.15745 |
| YWHAQ      | -0.10 | 10.09 | -1.43 | 0.15746 |
| SLC37A3    | -0.26 | 7.51  | -1.43 | 0.15747 |
| AC009487.2 | -0.18 | 5.80  | -1.43 | 0.15749 |
| SNX2       | -0.11 | 9.64  | -1.43 | 0.15752 |
| AC147651.4 | 0.13  | 6.22  | 1.43  | 0.15760 |
| ABCA5      | -0.16 | 6.47  | -1.43 | 0.15761 |
| POGK       | -0.09 | 8.85  | -1.43 | 0.15769 |
| AP003774.2 | 0.17  | 5.61  | 1.43  | 0.15774 |
| FRMPD3     | -0.19 | 6.33  | -1.43 | 0.15776 |
| FAM172A    | -0.13 | 6.89  | -1.43 | 0.15780 |
| GET3       | 0.10  | 9.88  | 1.43  | 0.15781 |

|            |       |       |       |         |
|------------|-------|-------|-------|---------|
| RUFY2      | -0.15 | 5.79  | -1.43 | 0.15785 |
| ZBTB6      | -0.14 | 6.59  | -1.43 | 0.15798 |
| CA11       | 0.17  | 7.37  | 1.43  | 0.15801 |
| NCEH1      | -0.17 | 6.30  | -1.43 | 0.15809 |
| AL035530.2 | -0.15 | 5.21  | -1.43 | 0.15810 |
| MBNL1      | -0.12 | 10.97 | -1.43 | 0.15810 |
| ADGRE3     | -0.21 | 10.23 | -1.43 | 0.15816 |
| CENPM      | 0.16  | 5.88  | 1.43  | 0.15823 |
| AFF4       | -0.14 | 8.09  | -1.43 | 0.15827 |
| USP19      | -0.09 | 10.44 | -1.43 | 0.15829 |
| ZNF598     | 0.10  | 9.23  | 1.43  | 0.15831 |
| AL138785.2 | 0.16  | 6.54  | 1.43  | 0.15833 |
| LUNAR1     | -0.21 | 5.27  | -1.43 | 0.15834 |
| TRBJ2-2    | 0.14  | 5.42  | 1.43  | 0.15838 |
| CARMIL3    | -0.16 | 6.12  | -1.43 | 0.15838 |
| AC008966.1 | 0.14  | 5.24  | 1.43  | 0.15857 |
| AC019181.1 | 0.15  | 5.40  | 1.43  | 0.15858 |
| ASL        | 0.14  | 8.13  | 1.43  | 0.15859 |
| C16orf72   | -0.16 | 9.34  | -1.43 | 0.15861 |
| SEC61A2    | -0.18 | 6.57  | -1.43 | 0.15861 |
| AHR        | -0.17 | 7.32  | -1.43 | 0.15864 |
| LOXL2      | -0.14 | 5.85  | -1.43 | 0.15878 |
| HNRNPU     | -0.09 | 11.51 | -1.43 | 0.15879 |
| RFFL       | -0.12 | 9.03  | -1.43 | 0.15882 |
| AC104619.1 | 0.15  | 6.03  | 1.43  | 0.15891 |
| STIM1      | 0.07  | 10.75 | 1.43  | 0.15894 |
| TMEM11     | 0.11  | 8.55  | 1.43  | 0.15895 |
| FKBP1B     | 0.17  | 5.30  | 1.43  | 0.15896 |
| MAPK6      | -0.16 | 6.43  | -1.43 | 0.15900 |
| KDM6B      | -0.21 | 11.72 | -1.43 | 0.15906 |
| LSM10      | 0.13  | 9.83  | 1.43  | 0.15908 |
| AVEN       | 0.13  | 6.68  | 1.43  | 0.15911 |
| GLB1       | -0.10 | 10.02 | -1.43 | 0.15915 |
| SAT2       | 0.13  | 9.22  | 1.43  | 0.15916 |
| SOCS4      | -0.14 | 6.62  | -1.43 | 0.15917 |
| HSPA9P1    | -0.21 | 5.71  | -1.43 | 0.15917 |
| ANKRD36C   | 0.23  | 5.99  | 1.43  | 0.15920 |
| AL121933.2 | 0.19  | 7.41  | 1.43  | 0.15921 |
| CABLES2    | -0.12 | 7.76  | -1.43 | 0.15922 |
| TFEB       | 0.16  | 10.59 | 1.43  | 0.15926 |
| UQCRC1     | 0.14  | 11.03 | 1.43  | 0.15929 |
| PABPN1     | 0.11  | 9.88  | 1.43  | 0.15932 |
| ATE1       | -0.14 | 6.94  | -1.43 | 0.15935 |
| TOR1AIP2   | -0.11 | 8.55  | -1.43 | 0.15936 |
| GLCC1      | -0.17 | 7.35  | -1.43 | 0.15944 |
| PLAG1      | 0.16  | 5.59  | 1.43  | 0.15948 |
| NDUFAB1    | 0.14  | 8.16  | 1.43  | 0.15962 |
| LTBP4      | 0.15  | 9.40  | 1.43  | 0.15963 |
| XPNPEP3    | 0.11  | 7.14  | 1.43  | 0.15969 |
| SRBD1      | -0.14 | 7.36  | -1.43 | 0.15971 |

|              |       |       |       |         |
|--------------|-------|-------|-------|---------|
| MAP2K3       | 0.18  | 12.19 | 1.43  | 0.15971 |
| RPL7AP60     | 0.17  | 4.99  | 1.43  | 0.15974 |
| AK1          | 0.21  | 6.67  | 1.43  | 0.15975 |
| BEST4        | -0.15 | 5.15  | -1.43 | 0.15985 |
| AC011899.2   | -0.20 | 5.98  | -1.43 | 0.15989 |
| SLC26A2      | -0.13 | 6.53  | -1.43 | 0.15990 |
| MED27        | 0.13  | 7.96  | 1.43  | 0.15994 |
| MYDGF        | 0.18  | 9.65  | 1.43  | 0.15996 |
| PPARD        | 0.11  | 9.39  | 1.43  | 0.16014 |
| RTL10        | 0.10  | 8.02  | 1.42  | 0.16020 |
| RPS20P10     | 0.19  | 5.13  | 1.42  | 0.16021 |
| ATP5PD       | 0.12  | 9.59  | 1.42  | 0.16026 |
| ANKH         | 0.17  | 9.96  | 1.42  | 0.16042 |
| DHRS4-AS1    | -0.12 | 7.29  | -1.42 | 0.16047 |
| NRF1         | 0.07  | 8.91  | 1.42  | 0.16052 |
| COASY        | 0.10  | 10.13 | 1.42  | 0.16053 |
| CPEB4        | -0.27 | 7.81  | -1.42 | 0.16054 |
| GLRX         | -0.13 | 10.56 | -1.42 | 0.16062 |
| ETFA         | -0.08 | 8.77  | -1.42 | 0.16071 |
| NADK         | -0.20 | 12.87 | -1.42 | 0.16072 |
| MRGBP        | 0.11  | 8.38  | 1.42  | 0.16081 |
| FAM157C      | -0.34 | 7.87  | -1.42 | 0.16084 |
| INTS6        | -0.13 | 8.12  | -1.42 | 0.16086 |
| FGD2         | -0.17 | 9.99  | -1.42 | 0.16090 |
| RPSAP15      | 0.20  | 7.27  | 1.42  | 0.16091 |
| CBR4         | -0.11 | 6.99  | -1.42 | 0.16094 |
| LUZP1        | -0.10 | 7.65  | -1.42 | 0.16127 |
| BACH2        | 0.22  | 8.73  | 1.42  | 0.16131 |
| RPUSD3       | 0.09  | 8.57  | 1.42  | 0.16135 |
| ARL6IP1      | -0.12 | 8.60  | -1.42 | 0.16143 |
| NCOR2        | 0.11  | 10.76 | 1.42  | 0.16143 |
| RPL23P8      | 0.23  | 8.13  | 1.42  | 0.16150 |
| IGHA2        | 0.50  | 10.93 | 1.42  | 0.16158 |
| PWWP3A       | 0.12  | 8.49  | 1.42  | 0.16170 |
| EHBP1        | -0.13 | 6.71  | -1.42 | 0.16184 |
| SMAD7        | -0.13 | 8.21  | -1.42 | 0.16185 |
| ZNF354A      | -0.19 | 7.12  | -1.42 | 0.16194 |
| SARM1        | 0.09  | 8.52  | 1.42  | 0.16201 |
| KRTCAP2      | -0.18 | 5.96  | -1.42 | 0.16219 |
| SZRD1        | 0.09  | 11.24 | 1.42  | 0.16219 |
| DPM3         | 0.20  | 7.92  | 1.42  | 0.16236 |
| ALPK1        | -0.27 | 9.68  | -1.42 | 0.16239 |
| ZNF597       | -0.09 | 6.19  | -1.42 | 0.16247 |
| TMEM129      | 0.10  | 9.06  | 1.42  | 0.16262 |
| AC130472.1   | 0.16  | 5.04  | 1.42  | 0.16283 |
| SIRPA        | -0.19 | 12.04 | -1.42 | 0.16286 |
| PSMD7        | 0.08  | 9.52  | 1.42  | 0.16287 |
| ATP6V0E2-AS1 | 0.17  | 6.13  | 1.42  | 0.16287 |
| ATF6         | -0.15 | 9.41  | -1.42 | 0.16292 |
| PHF20        | 0.10  | 9.88  | 1.42  | 0.16302 |

|            |       |       |       |         |
|------------|-------|-------|-------|---------|
| GRAP2      | 0.11  | 10.75 | 1.41  | 0.16311 |
| RAB4A      | 0.10  | 8.32  | 1.41  | 0.16320 |
| MED9       | 0.12  | 7.87  | 1.41  | 0.16330 |
| DGUOK      | 0.12  | 9.27  | 1.41  | 0.16340 |
| SLC9B2     | -0.13 | 6.13  | -1.41 | 0.16343 |
| ATF4       | 0.09  | 11.81 | 1.41  | 0.16346 |
| ZSCAN5A    | 0.14  | 6.18  | 1.41  | 0.16352 |
| NT5C       | 0.12  | 8.52  | 1.41  | 0.16352 |
| RNF170     | 0.11  | 7.14  | 1.41  | 0.16352 |
| CGAS       | -0.16 | 6.80  | -1.41 | 0.16365 |
| GFM2       | -0.10 | 7.12  | -1.41 | 0.16367 |
| TBPL1      | -0.12 | 7.30  | -1.41 | 0.16369 |
| RPL21P134  | 0.23  | 6.74  | 1.41  | 0.16376 |
| LMF1       | 0.15  | 7.59  | 1.41  | 0.16384 |
| SNRNP200   | -0.08 | 11.76 | -1.41 | 0.16386 |
| CDC42BPA   | -0.13 | 5.15  | -1.41 | 0.16394 |
| KIAA0556   | -0.14 | 8.80  | -1.41 | 0.16395 |
| ZNF417     | -0.14 | 6.66  | -1.41 | 0.16402 |
| LMTK2      | -0.19 | 8.86  | -1.41 | 0.16410 |
| MIGA2      | 0.12  | 9.10  | 1.41  | 0.16426 |
| STARD3     | 0.09  | 10.51 | 1.41  | 0.16426 |
| ZNF487     | -0.16 | 6.54  | -1.41 | 0.16427 |
| GTF3C6     | 0.11  | 7.86  | 1.41  | 0.16427 |
| DHFR2      | 0.12  | 6.68  | 1.41  | 0.16434 |
| HIP1R      | 0.14  | 9.04  | 1.41  | 0.16444 |
| NDUFAF1    | 0.14  | 7.58  | 1.41  | 0.16445 |
| HDAC4      | -0.17 | 9.36  | -1.41 | 0.16448 |
| PTPN18     | 0.09  | 12.08 | 1.41  | 0.16454 |
| SLC35E3    | 0.19  | 8.02  | 1.41  | 0.16477 |
| MIR3142HG  | -0.13 | 5.26  | -1.41 | 0.16481 |
| CAHM       | 0.15  | 5.01  | 1.41  | 0.16482 |
| TRIM37     | -0.12 | 7.16  | -1.41 | 0.16491 |
| GOLGA8A    | -0.28 | 7.58  | -1.41 | 0.16500 |
| SLC16A1    | -0.15 | 6.37  | -1.41 | 0.16503 |
| PIGL       | -0.14 | 6.45  | -1.41 | 0.16505 |
| PRKCD      | -0.14 | 12.04 | -1.41 | 0.16506 |
| ST6GALNAC1 | 0.24  | 5.77  | 1.41  | 0.16506 |
| UBAC2      | 0.08  | 10.30 | 1.41  | 0.16513 |
| ZFYVE16    | -0.17 | 7.66  | -1.41 | 0.16513 |
| EP400      | -0.10 | 9.74  | -1.41 | 0.16518 |
| TMEM267    | -0.14 | 5.98  | -1.41 | 0.16533 |
| UBE2D3P2   | -0.16 | 5.19  | -1.41 | 0.16536 |
| USP16      | -0.11 | 8.32  | -1.41 | 0.16536 |
| HLA-K      | 0.25  | 6.78  | 1.41  | 0.16539 |
| CREB3L4    | 0.14  | 6.72  | 1.41  | 0.16541 |
| CD53       | -0.13 | 12.93 | -1.41 | 0.16546 |
| SLC25A15   | 0.15  | 6.53  | 1.41  | 0.16555 |
| IFI44L     | -0.47 | 7.48  | -1.41 | 0.16564 |
| MT-ND3     | 0.12  | 13.03 | 1.41  | 0.16566 |
| DOP1B      | -0.12 | 8.76  | -1.41 | 0.16578 |

|            |       |       |       |         |
|------------|-------|-------|-------|---------|
| AC078817.1 | 0.16  | 6.21  | 1.41  | 0.16583 |
| SERPINF2   | 0.19  | 5.94  | 1.41  | 0.16588 |
| LINC00892  | 0.18  | 5.91  | 1.41  | 0.16592 |
| C4orf46    | -0.11 | 6.00  | -1.41 | 0.16593 |
| METTL7A    | 0.13  | 9.66  | 1.41  | 0.16593 |
| BMT2       | -0.14 | 6.74  | -1.40 | 0.16601 |
| CA5BP1     | 0.14  | 7.46  | 1.40  | 0.16611 |
| MTERF2     | -0.14 | 6.18  | -1.40 | 0.16613 |
| ACOX3      | 0.13  | 7.42  | 1.40  | 0.16646 |
| ZNF789     | -0.14 | 6.25  | -1.40 | 0.16646 |
| NECAP2     | 0.10  | 10.85 | 1.40  | 0.16650 |
| AL353743.1 | -0.13 | 5.48  | -1.40 | 0.16650 |
| GSDMD      | 0.12  | 10.84 | 1.40  | 0.16656 |
| CBX1       | -0.10 | 8.61  | -1.40 | 0.16660 |
| LINC01534  | 0.16  | 5.55  | 1.40  | 0.16662 |
| STAT5B     | -0.16 | 12.12 | -1.40 | 0.16666 |
| NFKBID     | 0.14  | 8.92  | 1.40  | 0.16676 |
| C12orf4    | -0.13 | 6.63  | -1.40 | 0.16677 |
| ATL2       | -0.14 | 6.99  | -1.40 | 0.16683 |
| TOMM34     | 0.12  | 8.42  | 1.40  | 0.16685 |
| ADI1       | 0.10  | 9.46  | 1.40  | 0.16686 |
| RPL7P15    | 0.14  | 5.02  | 1.40  | 0.16715 |
| AC023906.1 | 0.13  | 5.42  | 1.40  | 0.16715 |
| DIP2A      | -0.18 | 9.31  | -1.40 | 0.16727 |
| TRBV9      | 0.22  | 6.71  | 1.40  | 0.16728 |
| PINLYP     | 0.18  | 5.22  | 1.40  | 0.16732 |
| IKZF3      | 0.13  | 11.24 | 1.40  | 0.16732 |
| FAM168A    | -0.10 | 8.72  | -1.40 | 0.16735 |
| AC067852.2 | 0.11  | 7.92  | 1.40  | 0.16736 |
| LLGL2      | 0.16  | 9.24  | 1.40  | 0.16736 |
| SNRPG      | 0.12  | 7.91  | 1.40  | 0.16739 |
| MAGEH1     | 0.13  | 7.63  | 1.40  | 0.16744 |
| AC093591.1 | 0.14  | 6.64  | 1.40  | 0.16762 |
| PSMB8-AS1  | -0.09 | 10.24 | -1.40 | 0.16766 |
| TRBJ2-5    | 0.16  | 5.85  | 1.40  | 0.16772 |
| RAF1       | -0.14 | 11.77 | -1.40 | 0.16780 |
| MROH1      | 0.12  | 9.18  | 1.40  | 0.16786 |
| RYK        | -0.12 | 7.58  | -1.40 | 0.16788 |
| MRPL37P1   | 0.21  | 5.07  | 1.40  | 0.16789 |
| TMEM167B   | -0.11 | 9.23  | -1.40 | 0.16793 |
| TMEM187    | 0.13  | 7.26  | 1.40  | 0.16796 |
| RHOBTB2    | 0.18  | 8.27  | 1.40  | 0.16804 |
| PPRC1      | 0.09  | 9.38  | 1.40  | 0.16810 |
| TAOK3      | 0.13  | 10.99 | 1.40  | 0.16827 |
| RPL7P19    | 0.11  | 5.45  | 1.40  | 0.16844 |
| IL6R       | -0.16 | 12.25 | -1.40 | 0.16845 |
| NPAT       | -0.15 | 7.40  | -1.40 | 0.16846 |
| JADE2      | 0.10  | 10.84 | 1.40  | 0.16852 |
| AL354707.2 | 0.16  | 5.34  | 1.40  | 0.16853 |
| VAMP8      | 0.18  | 10.77 | 1.40  | 0.16859 |

|            |       |       |       |         |
|------------|-------|-------|-------|---------|
| PPARGC1B   | -0.15 | 6.17  | -1.40 | 0.16864 |
| RAB5IF     | 0.19  | 7.13  | 1.40  | 0.16867 |
| TRAV26-2   | 0.19  | 5.51  | 1.40  | 0.16867 |
| FCGR1B     | -0.33 | 7.78  | -1.40 | 0.16871 |
| TGFA       | -0.27 | 7.38  | -1.40 | 0.16892 |
| RPS4XP16   | 0.24  | 8.00  | 1.40  | 0.16894 |
| DVL1       | 0.11  | 8.31  | 1.39  | 0.16911 |
| RPL4P1     | 0.16  | 5.25  | 1.39  | 0.16921 |
| PROK2      | -0.32 | 9.91  | -1.39 | 0.16925 |
| HLA-DOB    | 0.20  | 7.58  | 1.39  | 0.16933 |
| AC127070.4 | 0.19  | 5.40  | 1.39  | 0.16958 |
| SPEG       | 0.19  | 5.46  | 1.39  | 0.16959 |
| ZNF253     | -0.16 | 5.85  | -1.39 | 0.16973 |
| GPR132     | 0.11  | 9.50  | 1.39  | 0.16977 |
| LSM14B     | -0.09 | 9.28  | -1.39 | 0.16979 |
| ACP6       | 0.11  | 7.21  | 1.39  | 0.16986 |
| SLC4A8     | -0.15 | 6.13  | -1.39 | 0.16987 |
| STARD10    | 0.14  | 8.54  | 1.39  | 0.16992 |
| TMCO4      | 0.10  | 8.33  | 1.39  | 0.16992 |
| CAPN3      | -0.25 | 6.56  | -1.39 | 0.16999 |
| PCP2       | 0.19  | 5.66  | 1.39  | 0.17006 |
| ANAPC11    | 0.16  | 9.37  | 1.39  | 0.17010 |
| RWDD2A     | -0.14 | 5.58  | -1.39 | 0.17011 |
| RPL4P4     | 0.21  | 10.41 | 1.39  | 0.17014 |
| ST8SIA6    | -0.15 | 5.20  | -1.39 | 0.17016 |
| DNM1L      | -0.09 | 7.85  | -1.39 | 0.17017 |
| TRAPPC3    | 0.09  | 9.55  | 1.39  | 0.17026 |
| PHKG2      | 0.11  | 9.61  | 1.39  | 0.17030 |
| RBPMS2     | 0.33  | 5.80  | 1.39  | 0.17039 |
| MDS2       | 0.18  | 6.24  | 1.39  | 0.17041 |
| HTATIP2    | -0.11 | 8.73  | -1.39 | 0.17056 |
| ZNF93      | 0.15  | 6.12  | 1.39  | 0.17066 |
| AC010343.1 | 0.23  | 9.37  | 1.39  | 0.17072 |
| RNF138     | -0.13 | 7.32  | -1.39 | 0.17073 |
| AP000919.4 | -0.16 | 5.18  | -1.39 | 0.17073 |
| AL513550.1 | 0.15  | 5.91  | 1.39  | 0.17073 |
| ARMC1      | -0.13 | 7.14  | -1.39 | 0.17073 |
| AC005822.1 | -0.13 | 5.23  | -1.39 | 0.17081 |
| FAM200A    | -0.11 | 6.53  | -1.39 | 0.17082 |
| TMEM258    | 0.15  | 9.16  | 1.39  | 0.17090 |
| PIGF       | -0.11 | 6.57  | -1.39 | 0.17093 |
| MARC1      | -0.25 | 7.70  | -1.39 | 0.17104 |
| ATG4D      | 0.11  | 9.03  | 1.39  | 0.17108 |
| PALD1      | 0.16  | 5.49  | 1.39  | 0.17110 |
| TSPAN18    | 0.14  | 8.94  | 1.39  | 0.17117 |
| MATR3      | -0.11 | 10.14 | -1.39 | 0.17130 |
| AL353593.1 | -0.14 | 5.59  | -1.39 | 0.17134 |
| MRPL22     | 0.11  | 7.38  | 1.39  | 0.17138 |
| PIK3CD-AS1 | -0.18 | 5.86  | -1.39 | 0.17141 |
| GTF2IP4    | -0.18 | 7.70  | -1.39 | 0.17147 |



|            |       |       |       |         |
|------------|-------|-------|-------|---------|
| ECHDC1     | -0.13 | 8.07  | -1.39 | 0.17149 |
| ZNF496     | -0.13 | 7.84  | -1.39 | 0.17161 |
| AL445433.1 | 0.19  | 6.79  | 1.39  | 0.17166 |
| OSBPL5     | -0.15 | 9.51  | -1.39 | 0.17176 |
| ZNF230     | -0.16 | 7.10  | -1.39 | 0.17182 |
| AC135068.8 | 0.17  | 4.98  | 1.39  | 0.17190 |
| ZNF764     | 0.10  | 7.37  | 1.39  | 0.17192 |
| ZNF792     | 0.14  | 7.10  | 1.38  | 0.17202 |
| PTP4A3     | 0.16  | 8.58  | 1.38  | 0.17213 |
| CRIP1      | -0.10 | 7.50  | -1.38 | 0.17216 |
| PDIK1L     | -0.13 | 6.28  | -1.38 | 0.17221 |
| REV1       | -0.10 | 7.87  | -1.38 | 0.17222 |
| UBE2M      | 0.13  | 9.31  | 1.38  | 0.17232 |
| ZNF680     | -0.15 | 5.42  | -1.38 | 0.17257 |
| CNOT2-DT   | 0.15  | 6.22  | 1.38  | 0.17258 |
| PPIB       | 0.17  | 12.24 | 1.38  | 0.17265 |
| SMC2       | -0.14 | 6.45  | -1.38 | 0.17269 |
| TPI1P1     | 0.17  | 7.85  | 1.38  | 0.17272 |
| AC103810.3 | 0.17  | 5.12  | 1.38  | 0.17274 |
| MYORG      | -0.14 | 5.05  | -1.38 | 0.17275 |
| SELENOT    | -0.12 | 8.72  | -1.38 | 0.17275 |
| ZEB1-AS1   | -0.14 | 5.70  | -1.38 | 0.17300 |
| G6PC3      | 0.15  | 8.61  | 1.38  | 0.17303 |
| AC245060.5 | 0.30  | 6.75  | 1.38  | 0.17307 |
| LIME1      | 0.21  | 5.81  | 1.38  | 0.17308 |
| FCSK       | 0.10  | 8.39  | 1.38  | 0.17308 |
| EEF1AKMT4  | 0.16  | 5.71  | 1.38  | 0.17318 |
| DNAJC1     | 0.13  | 8.84  | 1.38  | 0.17323 |
| UBE4B      | -0.11 | 9.77  | -1.38 | 0.17329 |
| NIPA2      | -0.08 | 9.07  | -1.38 | 0.17330 |
| GAL3ST4    | 0.22  | 7.10  | 1.38  | 0.17338 |
| MPST       | 0.15  | 8.46  | 1.38  | 0.17340 |
| H2BC9      | -0.18 | 6.00  | -1.38 | 0.17340 |
| STK36      | -0.16 | 7.01  | -1.38 | 0.17342 |
| RPL38P3    | 0.16  | 6.05  | 1.38  | 0.17346 |
| LRRC45     | 0.12  | 7.90  | 1.38  | 0.17346 |
| SLC14A1    | 0.28  | 7.98  | 1.38  | 0.17349 |
| ZNF746     | -0.16 | 10.09 | -1.38 | 0.17349 |
| RNGTT      | -0.13 | 7.33  | -1.38 | 0.17352 |
| AF117829.1 | -0.13 | 5.27  | -1.38 | 0.17364 |
| DPP8       | -0.10 | 8.34  | -1.38 | 0.17364 |
| LZIC       | 0.11  | 8.44  | 1.38  | 0.17368 |
| CDCA8      | -0.11 | 6.00  | -1.38 | 0.17368 |
| DYRK1B     | 0.13  | 8.72  | 1.38  | 0.17371 |
| MS4A4A     | -0.21 | 6.28  | -1.38 | 0.17374 |
| GPR180     | -0.14 | 5.80  | -1.38 | 0.17375 |
| CLP1       | -0.09 | 8.26  | -1.38 | 0.17376 |
| TMEM205    | 0.15  | 8.69  | 1.38  | 0.17377 |
| TTC32      | -0.13 | 6.22  | -1.38 | 0.17393 |
| SLC41A3    | 0.10  | 8.76  | 1.38  | 0.17396 |

|            |       |       |       |         |
|------------|-------|-------|-------|---------|
| TRAV13-1   | 0.16  | 7.22  | 1.38  | 0.17396 |
| HSPBAP1    | -0.14 | 8.21  | -1.38 | 0.17399 |
| LINC02285  | -0.16 | 4.86  | -1.38 | 0.17400 |
| LYZ        | -0.23 | 14.34 | -1.38 | 0.17411 |
| CNN2       | 0.14  | 13.63 | 1.38  | 0.17415 |
| UIMC1      | -0.12 | 9.18  | -1.38 | 0.17417 |
| AC092045.1 | -0.18 | 6.07  | -1.38 | 0.17418 |
| CSAD       | -0.25 | 9.21  | -1.38 | 0.17425 |
| FAM207A    | 0.14  | 6.85  | 1.38  | 0.17427 |
| GUSB       | 0.10  | 10.49 | 1.38  | 0.17444 |
| NELFA      | 0.10  | 8.64  | 1.38  | 0.17445 |
| TRIM33     | 0.15  | 9.23  | 1.38  | 0.17448 |
| GMPPA      | 0.13  | 9.33  | 1.38  | 0.17460 |
| TMED5      | -0.13 | 8.40  | -1.38 | 0.17460 |
| TST        | 0.17  | 8.92  | 1.38  | 0.17461 |
| FO393411.1 | 0.21  | 9.17  | 1.38  | 0.17462 |
| CEP57      | -0.10 | 7.90  | -1.38 | 0.17462 |
| MIS12      | -0.12 | 7.29  | -1.38 | 0.17466 |
| LINC00920  | 0.14  | 5.49  | 1.38  | 0.17471 |
| RINL       | 0.08  | 9.20  | 1.38  | 0.17471 |
| TGIF1      | 0.11  | 8.07  | 1.38  | 0.17473 |
| ACTG1P20   | 0.18  | 6.58  | 1.38  | 0.17473 |
| NOG        | 0.26  | 6.35  | 1.38  | 0.17474 |
| REM2       | -0.20 | 7.61  | -1.38 | 0.17483 |
| GATD1      | 0.11  | 9.03  | 1.38  | 0.17485 |
| HLA-W      | -0.48 | 7.42  | -1.38 | 0.17485 |
| MT-TQ      | -0.12 | 4.98  | -1.38 | 0.17486 |
| ULK2       | -0.12 | 7.87  | -1.38 | 0.17504 |
| TXLNG      | -0.13 | 7.09  | -1.37 | 0.17509 |
| RGCC       | 0.14  | 8.71  | 1.37  | 0.17510 |
| AC090198.1 | -0.16 | 5.06  | -1.37 | 0.17511 |
| TRIP4      | -0.08 | 8.21  | -1.37 | 0.17515 |
| ARPC5L     | 0.11  | 8.97  | 1.37  | 0.17523 |
| NCLP1      | -0.14 | 5.14  | -1.37 | 0.17524 |
| IER3       | 0.18  | 8.35  | 1.37  | 0.17525 |
| SNX5       | -0.09 | 9.06  | -1.37 | 0.17531 |
| SDF2L1     | 0.18  | 8.22  | 1.37  | 0.17537 |
| MAP2K6     | -0.16 | 7.57  | -1.37 | 0.17556 |
| TBCC       | -0.07 | 9.55  | -1.37 | 0.17557 |
| PSMC6      | -0.07 | 8.90  | -1.37 | 0.17562 |
| MCM8       | 0.14  | 5.99  | 1.37  | 0.17563 |
| NOL10      | 0.11  | 7.76  | 1.37  | 0.17563 |
| EFNA5      | -0.20 | 5.00  | -1.37 | 0.17565 |
| H2BC4      | -0.25 | 7.63  | -1.37 | 0.17570 |
| SLC35E4    | 0.14  | 5.63  | 1.37  | 0.17572 |
| BRCA1      | -0.14 | 6.75  | -1.37 | 0.17574 |
| C4orf33    | -0.15 | 6.33  | -1.37 | 0.17576 |
| AC008124.1 | -0.10 | 7.14  | -1.37 | 0.17579 |
| SMIM11B    | -0.12 | 4.98  | -1.37 | 0.17580 |
| NDUFA6-DT  | -0.11 | 5.66  | -1.37 | 0.17581 |

|            |       |       |       |         |
|------------|-------|-------|-------|---------|
| AL645949.2 | 0.13  | 5.31  | 1.37  | 0.17597 |
| P2RX7      | -0.15 | 8.22  | -1.37 | 0.17604 |
| FCER2      | 0.30  | 9.27  | 1.37  | 0.17606 |
| PLEKHA8P1  | 0.11  | 6.61  | 1.37  | 0.17608 |
| AC005224.3 | 0.15  | 5.47  | 1.37  | 0.17609 |
| ORMDL1     | -0.11 | 8.33  | -1.37 | 0.17609 |
| ICAM1      | -0.15 | 9.62  | -1.37 | 0.17614 |
| SLC16A7    | -0.14 | 6.48  | -1.37 | 0.17615 |
| SCN1B      | 0.25  | 7.08  | 1.37  | 0.17616 |
| HSPA8P7    | -0.14 | 5.20  | -1.37 | 0.17617 |
| KTN1       | 0.14  | 9.65  | 1.37  | 0.17624 |
| LIMK1      | 0.10  | 9.95  | 1.37  | 0.17624 |
| SERP1      | 0.12  | 10.61 | 1.37  | 0.17625 |
| TBCD       | 0.10  | 10.37 | 1.37  | 0.17627 |
| PIGX       | -0.14 | 8.61  | -1.37 | 0.17641 |
| ASTN2      | 0.14  | 5.72  | 1.37  | 0.17643 |
| SPCS2P4    | -0.15 | 6.05  | -1.37 | 0.17651 |
| SLC37A4    | 0.09  | 7.70  | 1.37  | 0.17656 |
| TAF6L      | 0.13  | 7.25  | 1.37  | 0.17656 |
| PIK3C2A    | -0.15 | 6.44  | -1.37 | 0.17657 |
| CLSTN1     | 0.09  | 11.29 | 1.37  | 0.17660 |
| ARMCX5     | -0.12 | 6.09  | -1.37 | 0.17661 |
| WBP4       | 0.16  | 8.02  | 1.37  | 0.17674 |
| RBM18      | -0.09 | 7.85  | -1.37 | 0.17674 |
| SIMC1      | -0.12 | 7.05  | -1.37 | 0.17678 |
| KIR2DL4    | -0.19 | 5.50  | -1.37 | 0.17688 |
| RERE       | -0.13 | 11.34 | -1.37 | 0.17689 |
| AL645933.3 | -0.34 | 6.40  | -1.37 | 0.17692 |
| OSTF1      | -0.15 | 10.34 | -1.37 | 0.17695 |
| RPL3P2     | 0.18  | 8.60  | 1.37  | 0.17696 |
| MT-TL1     | 0.20  | 7.30  | 1.37  | 0.17707 |
| PARP15     | -0.20 | 7.65  | -1.37 | 0.17709 |
| POLD2P1    | 0.13  | 4.98  | 1.37  | 0.17710 |
| DNAJB11    | -0.11 | 7.73  | -1.37 | 0.17722 |
| HPS1       | 0.16  | 11.20 | 1.37  | 0.17723 |
| COPS9      | 0.17  | 8.37  | 1.37  | 0.17724 |
| AC097376.2 | 0.21  | 5.04  | 1.37  | 0.17750 |
| RNF215     | 0.11  | 6.53  | 1.37  | 0.17751 |
| PASK       | 0.18  | 9.13  | 1.37  | 0.17755 |
| KIAA0355   | -0.13 | 8.32  | -1.37 | 0.17771 |
| KLHL5      | -0.12 | 7.13  | -1.37 | 0.17776 |
| COX17      | 0.14  | 8.05  | 1.37  | 0.17778 |
| RPL35AP21  | 0.21  | 6.53  | 1.37  | 0.17779 |
| ZNF207     | -0.07 | 10.12 | -1.37 | 0.17779 |
| RAD54L2    | 0.08  | 8.75  | 1.37  | 0.17784 |
| PLCH2      | -0.21 | 7.58  | -1.37 | 0.17794 |
| SMG6       | 0.08  | 9.43  | 1.37  | 0.17803 |
| API5       | -0.11 | 9.02  | -1.37 | 0.17807 |
| SPINT1     | 0.15  | 9.18  | 1.37  | 0.17807 |
| ENKUR      | -0.17 | 6.20  | -1.36 | 0.17817 |

|            |       |       |       |         |
|------------|-------|-------|-------|---------|
| POU5F1B    | 0.19  | 5.00  | 1.36  | 0.17819 |
| LRRC37BP1  | 0.10  | 6.23  | 1.36  | 0.17821 |
| CASC3      | -0.14 | 11.19 | -1.36 | 0.17823 |
| SPATA6     | -0.16 | 5.89  | -1.36 | 0.17826 |
| KLF13      | -0.09 | 12.28 | -1.36 | 0.17827 |
| ERF        | 0.12  | 9.10  | 1.36  | 0.17832 |
| GPR107     | -0.09 | 9.69  | -1.36 | 0.17833 |
| TLK2P1     | -0.14 | 5.43  | -1.36 | 0.17840 |
| ACOT9      | -0.12 | 8.88  | -1.36 | 0.17841 |
| DOCK7      | -0.13 | 5.94  | -1.36 | 0.17855 |
| AC011484.1 | 0.26  | 5.09  | 1.36  | 0.17865 |
| ABHD17AP1  | 0.14  | 5.80  | 1.36  | 0.17874 |
| SH3BP5-AS1 | -0.22 | 7.50  | -1.36 | 0.17881 |
| TBC1D10A   | 0.08  | 8.50  | 1.36  | 0.17887 |
| WDR91      | -0.11 | 8.62  | -1.36 | 0.17890 |
| BNIP1      | 0.13  | 6.87  | 1.36  | 0.17908 |
| ZNF92      | -0.15 | 6.52  | -1.36 | 0.17913 |
| EFHC2      | -0.18 | 5.38  | -1.36 | 0.17921 |
| WARS1      | -0.22 | 11.73 | -1.36 | 0.17936 |
| HARS1      | 0.08  | 9.63  | 1.36  | 0.17940 |
| TMEM109    | 0.11  | 10.38 | 1.36  | 0.17943 |
| TMEM120B   | 0.14  | 6.64  | 1.36  | 0.17945 |
| HMBBOX1    | 0.11  | 7.99  | 1.36  | 0.17946 |
| ZBTB39     | -0.12 | 6.83  | -1.36 | 0.17950 |
| APOL2      | -0.16 | 10.87 | -1.36 | 0.17960 |
| BBS4       | -0.11 | 6.79  | -1.36 | 0.17969 |
| ARFIP1     | -0.15 | 7.77  | -1.36 | 0.17985 |
| TUBD1      | 0.11  | 6.90  | 1.36  | 0.17987 |
| INAFM1     | 0.16  | 7.53  | 1.36  | 0.17987 |
| HINT3      | -0.10 | 7.56  | -1.36 | 0.17998 |
| NPL        | -0.18 | 9.94  | -1.36 | 0.18009 |
| BNC2       | -0.19 | 5.03  | -1.36 | 0.18010 |
| CAST       | -0.11 | 10.85 | -1.36 | 0.18011 |
| SUZ12      | -0.12 | 7.71  | -1.36 | 0.18012 |
| INIP       | -0.08 | 8.11  | -1.36 | 0.18017 |
| SLC4A7     | -0.15 | 6.46  | -1.36 | 0.18022 |
| KIN        | -0.11 | 7.14  | -1.36 | 0.18024 |
| AC093249.6 | 0.19  | 5.05  | 1.36  | 0.18034 |
| EIF4HP1    | -0.18 | 5.99  | -1.36 | 0.18042 |
| LSM3       | 0.11  | 8.43  | 1.36  | 0.18063 |
| IGHA1      | 0.46  | 12.84 | 1.36  | 0.18064 |
| AC215522.2 | -0.24 | 5.80  | -1.36 | 0.18069 |
| LINC00641  | -0.19 | 5.58  | -1.36 | 0.18071 |
| AC020899.1 | 0.10  | 5.30  | 1.36  | 0.18072 |
| TRBV11-2   | 0.20  | 6.58  | 1.36  | 0.18074 |
| DLGAP1-AS1 | 0.15  | 7.06  | 1.36  | 0.18079 |
| GABPB2     | 0.12  | 8.43  | 1.36  | 0.18080 |
| WDR59      | 0.09  | 9.21  | 1.36  | 0.18083 |
| PFDN2      | 0.11  | 8.25  | 1.36  | 0.18084 |
| UBE2J2     | 0.08  | 9.24  | 1.36  | 0.18097 |

|            |       |       |       |         |
|------------|-------|-------|-------|---------|
| TPT1P6     | 0.14  | 6.28  | 1.36  | 0.18104 |
| SUN1       | -0.18 | 8.62  | -1.36 | 0.18107 |
| LIAS       | 0.09  | 7.21  | 1.36  | 0.18108 |
| KCNJ2-AS1  | -0.18 | 5.09  | -1.36 | 0.18110 |
| UBXN6      | 0.27  | 12.45 | 1.36  | 0.18113 |
| JOSD2      | 0.18  | 7.21  | 1.36  | 0.18121 |
| AC079922.1 | 0.15  | 6.72  | 1.36  | 0.18126 |
| NCBP2AS2   | 0.11  | 7.92  | 1.35  | 0.18137 |
| PRCP       | -0.09 | 10.08 | -1.35 | 0.18137 |
| HCG18      | 0.12  | 8.50  | 1.35  | 0.18139 |
| SLC8B1     | 0.10  | 10.20 | 1.35  | 0.18150 |
| AC016747.1 | 0.16  | 6.31  | 1.35  | 0.18165 |
| DTX3       | 0.15  | 8.17  | 1.35  | 0.18167 |
| SBF1       | 0.09  | 11.41 | 1.35  | 0.18181 |
| ABHD8      | 0.16  | 7.93  | 1.35  | 0.18191 |
| AOC2       | -0.23 | 7.29  | -1.35 | 0.18196 |
| PRPF40A    | -0.10 | 9.15  | -1.35 | 0.18203 |
| WASHC5     | -0.10 | 8.41  | -1.35 | 0.18208 |
| ANO10      | -0.11 | 7.87  | -1.35 | 0.18215 |
| FCRL6      | -0.21 | 8.89  | -1.35 | 0.18223 |
| MT-TI      | 0.20  | 6.72  | 1.35  | 0.18226 |
| PAX5       | 0.29  | 9.27  | 1.35  | 0.18232 |
| ZNF90      | -0.13 | 5.06  | -1.35 | 0.18236 |
| CCL5       | 0.24  | 13.71 | 1.35  | 0.18241 |
| METAP1     | -0.11 | 8.06  | -1.35 | 0.18243 |
| ARMC8      | -0.07 | 8.65  | -1.35 | 0.18264 |
| RNF212     | 0.20  | 5.17  | 1.35  | 0.18270 |
| PRMT3      | -0.12 | 6.06  | -1.35 | 0.18280 |
| GABPB1-AS1 | 0.30  | 8.25  | 1.35  | 0.18281 |
| ZNF571     | -0.12 | 5.55  | -1.35 | 0.18282 |
| AC099524.1 | 0.20  | 6.47  | 1.35  | 0.18283 |
| DVL2       | 0.09  | 8.68  | 1.35  | 0.18297 |
| IRF8       | -0.13 | 9.97  | -1.35 | 0.18306 |
| FGR        | -0.15 | 13.45 | -1.35 | 0.18316 |
| ZNF337-AS1 | 0.15  | 5.06  | 1.35  | 0.18322 |
| AC005831.1 | -0.16 | 5.55  | -1.35 | 0.18331 |
| AC114752.2 | -0.18 | 4.97  | -1.35 | 0.18336 |
| COLGALT2   | -0.22 | 6.10  | -1.35 | 0.18350 |
| CCDC92     | 0.10  | 9.92  | 1.35  | 0.18352 |
| BTBD9      | 0.08  | 8.30  | 1.35  | 0.18354 |
| WIP1       | -0.16 | 8.27  | -1.35 | 0.18355 |
| WDFY2      | -0.09 | 9.36  | -1.35 | 0.18359 |
| TAF7       | -0.08 | 10.38 | -1.35 | 0.18371 |
| CCDC47     | -0.11 | 8.30  | -1.35 | 0.18373 |
| TRBV5-5    | 0.15  | 5.54  | 1.35  | 0.18382 |
| TEKT4P2    | 0.30  | 7.79  | 1.35  | 0.18397 |
| NEO1       | 0.14  | 7.10  | 1.35  | 0.18398 |
| GEMIN8     | 0.12  | 7.29  | 1.35  | 0.18411 |
| AC005005.1 | 0.12  | 5.02  | 1.35  | 0.18412 |
| VAV3       | -0.15 | 8.23  | -1.35 | 0.18415 |

|            |       |       |       |         |
|------------|-------|-------|-------|---------|
| MTIF3      | 0.08  | 8.69  | 1.35  | 0.18417 |
| AC116533.1 | 0.19  | 10.52 | 1.35  | 0.18420 |
| AP1S2      | -0.12 | 9.78  | -1.35 | 0.18421 |
| RRNAD1     | 0.10  | 8.17  | 1.35  | 0.18425 |
| LILRA6     | -0.24 | 10.77 | -1.35 | 0.18426 |
| EMID1      | 0.21  | 5.30  | 1.35  | 0.18428 |
| HMGB1P6    | -0.18 | 7.34  | -1.35 | 0.18429 |
| LINC01781  | 0.22  | 5.34  | 1.35  | 0.18431 |
| AC104837.1 | -0.17 | 5.48  | -1.35 | 0.18433 |
| AC138150.1 | -0.13 | 5.02  | -1.35 | 0.18435 |
| TNNC2      | 0.20  | 5.71  | 1.35  | 0.18436 |
| CD40       | 0.13  | 8.30  | 1.35  | 0.18445 |
| BRI3BP     | 0.12  | 8.39  | 1.34  | 0.18450 |
| LRRC4      | -0.25 | 8.89  | -1.34 | 0.18469 |
| MRPS23     | 0.11  | 7.93  | 1.34  | 0.18471 |
| NEDD4      | -0.18 | 5.50  | -1.34 | 0.18475 |
| ACSL6      | 0.13  | 6.07  | 1.34  | 0.18486 |
| BCL2L2     | -0.11 | 6.83  | -1.34 | 0.18488 |
| SMG8       | -0.11 | 7.37  | -1.34 | 0.18491 |
| RNF220     | 0.07  | 10.62 | 1.34  | 0.18493 |
| ENO2       | 0.13  | 9.07  | 1.34  | 0.18495 |
| AL078621.3 | 0.14  | 5.21  | 1.34  | 0.18496 |
| CLPX       | -0.11 | 8.12  | -1.34 | 0.18509 |
| EMG1       | 0.11  | 9.03  | 1.34  | 0.18521 |
| CLN5       | 0.09  | 7.24  | 1.34  | 0.18525 |
| RPS7P11    | 0.15  | 6.56  | 1.34  | 0.18528 |
| TNS3       | -0.16 | 8.32  | -1.34 | 0.18532 |
| SNN        | -0.16 | 11.37 | -1.34 | 0.18536 |
| NSRP1      | 0.15  | 8.68  | 1.34  | 0.18538 |
| PTPN13     | -0.18 | 5.42  | -1.34 | 0.18542 |
| STX10      | 0.13  | 11.16 | 1.34  | 0.18544 |
| GTF2IP1    | -0.19 | 7.60  | -1.34 | 0.18546 |
| TKFC       | 0.10  | 8.57  | 1.34  | 0.18546 |
| DPH1       | 0.12  | 7.46  | 1.34  | 0.18547 |
| ZNF736     | -0.16 | 6.77  | -1.34 | 0.18551 |
| HMCES      | 0.09  | 9.60  | 1.34  | 0.18567 |
| ZNF211     | -0.10 | 7.96  | -1.34 | 0.18579 |
| AC015911.3 | -0.16 | 5.74  | -1.34 | 0.18582 |
| TGM1       | -0.15 | 5.69  | -1.34 | 0.18589 |
| RNF113A    | 0.11  | 9.40  | 1.34  | 0.18593 |
| CORO2A     | 0.09  | 8.07  | 1.34  | 0.18594 |
| CAPRIN2    | -0.13 | 7.38  | -1.34 | 0.18596 |
| HSPA14     | -0.07 | 7.82  | -1.34 | 0.18602 |
| TMSB10P1   | 0.20  | 7.55  | 1.34  | 0.18618 |
| LINC00963  | 0.17  | 9.94  | 1.34  | 0.18623 |
| COPDA1     | 0.22  | 5.07  | 1.34  | 0.18634 |
| ATP5MGP2   | 0.17  | 6.13  | 1.34  | 0.18636 |
| C15orf41   | -0.15 | 5.28  | -1.34 | 0.18645 |
| WASHC2A    | -0.09 | 9.00  | -1.34 | 0.18655 |
| RORA       | -0.13 | 8.02  | -1.34 | 0.18655 |

|            |       |       |       |         |
|------------|-------|-------|-------|---------|
| RPSAP12    | 0.19  | 7.62  | 1.34  | 0.18658 |
| FAAP24     | 0.13  | 6.67  | 1.34  | 0.18672 |
| SNIP1      | -0.09 | 7.62  | -1.34 | 0.18675 |
| LINC00265  | -0.14 | 6.78  | -1.34 | 0.18678 |
| TSPAN17    | 0.13  | 9.27  | 1.34  | 0.18680 |
| SAMD10     | 0.18  | 7.45  | 1.34  | 0.18681 |
| FTSJ3      | 0.10  | 9.62  | 1.34  | 0.18682 |
| KSR1       | -0.14 | 9.39  | -1.34 | 0.18713 |
| HADHA      | 0.09  | 11.92 | 1.34  | 0.18717 |
| HEATR6     | -0.10 | 7.65  | -1.34 | 0.18719 |
| CTR9       | -0.09 | 9.49  | -1.34 | 0.18722 |
| FOXP4      | 0.15  | 8.25  | 1.34  | 0.18727 |
| PHF21A     | -0.17 | 10.84 | -1.34 | 0.18730 |
| RWDD2B     | 0.12  | 6.68  | 1.34  | 0.18731 |
| ICA1L      | 0.16  | 5.62  | 1.34  | 0.18737 |
| SNRNP48    | -0.10 | 6.98  | -1.34 | 0.18738 |
| MBOAT2     | -0.22 | 7.87  | -1.34 | 0.18750 |
| ZNF274     | -0.10 | 8.82  | -1.34 | 0.18753 |
| LINC00402  | 0.21  | 6.45  | 1.34  | 0.18764 |
| ZFAND2A    | 0.16  | 7.92  | 1.34  | 0.18766 |
| NAT9       | 0.11  | 8.64  | 1.33  | 0.18774 |
| AL136968.2 | 0.13  | 5.40  | 1.33  | 0.18795 |
| HSPA13     | -0.14 | 6.39  | -1.33 | 0.18806 |
| PARK7      | 0.12  | 10.85 | 1.33  | 0.18807 |
| SFI1       | 0.13  | 10.05 | 1.33  | 0.18822 |
| IGSF22     | 0.14  | 5.22  | 1.33  | 0.18825 |
| RPL10P19   | 0.15  | 5.83  | 1.33  | 0.18840 |
| SLC12A2    | -0.14 | 5.71  | -1.33 | 0.18844 |
| AL132709.8 | 0.17  | 5.80  | 1.33  | 0.18848 |
| MGAT1      | 0.10  | 12.27 | 1.33  | 0.18850 |
| CA13       | -0.15 | 5.23  | -1.33 | 0.18853 |
| ACO1       | -0.12 | 7.33  | -1.33 | 0.18854 |
| ADH5       | 0.09  | 9.14  | 1.33  | 0.18861 |
| TMEM9      | 0.14  | 8.75  | 1.33  | 0.18877 |
| SAP18      | 0.08  | 10.48 | 1.33  | 0.18880 |
| EXOC3-AS1  | 0.16  | 5.39  | 1.33  | 0.18888 |
| P2RY8      | 0.09  | 11.44 | 1.33  | 0.18888 |
| RTN4       | -0.11 | 9.90  | -1.33 | 0.18889 |
| PNPLA4     | 0.12  | 6.32  | 1.33  | 0.18904 |
| KIAA1671   | -0.22 | 6.82  | -1.33 | 0.18916 |
| MLF2       | 0.12  | 11.34 | 1.33  | 0.18918 |
| EAPP       | -0.08 | 9.49  | -1.33 | 0.18924 |
| MRPL1      | 0.13  | 6.86  | 1.33  | 0.18927 |
| RUFY3      | -0.10 | 7.42  | -1.33 | 0.18932 |
| HSD17B11   | -0.15 | 10.15 | -1.33 | 0.18935 |
| ANKLE1     | -0.14 | 6.16  | -1.33 | 0.18937 |
| ALOX15B    | -0.22 | 5.54  | -1.33 | 0.18944 |
| ABCC5      | -0.17 | 8.90  | -1.33 | 0.18944 |
| MMS22L     | -0.11 | 5.83  | -1.33 | 0.18950 |
| MFN1       | -0.12 | 7.73  | -1.33 | 0.18950 |

|            |       |       |       |         |
|------------|-------|-------|-------|---------|
| EFTUD2     | 0.10  | 10.76 | 1.33  | 0.18951 |
| TP53RK     | 0.10  | 7.97  | 1.33  | 0.18957 |
| CRCP       | 0.08  | 8.10  | 1.33  | 0.18971 |
| AC141586.1 | 0.12  | 4.99  | 1.33  | 0.18973 |
| NANS       | 0.14  | 8.98  | 1.33  | 0.18978 |
| THUMPD1    | -0.10 | 8.20  | -1.33 | 0.18980 |
| IKBKG      | 0.11  | 7.94  | 1.33  | 0.18981 |
| TRNAU1AP   | 0.09  | 8.54  | 1.33  | 0.18985 |
| LPAR6      | -0.14 | 8.56  | -1.33 | 0.18993 |
| ANKRD36    | 0.17  | 5.89  | 1.33  | 0.19004 |
| ABCA3      | 0.11  | 7.54  | 1.33  | 0.19020 |
| ZNF70      | -0.16 | 5.93  | -1.33 | 0.19040 |
| GBGT1      | 0.15  | 8.21  | 1.33  | 0.19057 |
| RPL7P18    | 0.19  | 5.56  | 1.33  | 0.19070 |
| AC004466.1 | 0.14  | 5.12  | 1.33  | 0.19083 |
| SUN2       | 0.07  | 13.59 | 1.33  | 0.19085 |
| ZNF879     | 0.14  | 5.90  | 1.33  | 0.19090 |
| RBM15B     | 0.08  | 10.15 | 1.33  | 0.19094 |
| HAAO       | 0.15  | 6.98  | 1.33  | 0.19096 |
| SLC35A1    | -0.11 | 7.45  | -1.32 | 0.19100 |
| SDHD       | -0.12 | 7.81  | -1.32 | 0.19106 |
| PITPNB     | -0.07 | 8.48  | -1.32 | 0.19107 |
| ZFY        | -0.32 | 5.41  | -1.32 | 0.19115 |
| CLCC1      | -0.10 | 7.61  | -1.32 | 0.19115 |
| CSGALNACT1 | -0.25 | 8.18  | -1.32 | 0.19123 |
| POP4       | 0.09  | 8.84  | 1.32  | 0.19126 |
| C17orf113  | 0.12  | 5.09  | 1.32  | 0.19134 |
| DDX24      | 0.09  | 11.23 | 1.32  | 0.19158 |
| AC009041.1 | 0.19  | 5.97  | 1.32  | 0.19165 |
| ZNF853     | 0.13  | 6.84  | 1.32  | 0.19165 |
| FBH1       | 0.06  | 10.11 | 1.32  | 0.19170 |
| SCAMP5     | 0.19  | 6.60  | 1.32  | 0.19172 |
| RNU7-45P   | 0.21  | 5.00  | 1.32  | 0.19177 |
| AC040162.1 | -0.19 | 7.02  | -1.32 | 0.19189 |
| ANKRD13C   | -0.11 | 6.61  | -1.32 | 0.19191 |
| N4BP2L2    | -0.13 | 9.83  | -1.32 | 0.19193 |
| GNG8       | 0.14  | 5.09  | 1.32  | 0.19197 |
| NAA40      | -0.11 | 8.38  | -1.32 | 0.19197 |
| P4HTM      | 0.12  | 8.35  | 1.32  | 0.19205 |
| ADAP1      | 0.18  | 8.09  | 1.32  | 0.19218 |
| GMPSP1     | 0.16  | 5.09  | 1.32  | 0.19220 |
| KCTD20     | -0.10 | 9.78  | -1.32 | 0.19222 |
| PITPNM1    | 0.09  | 10.81 | 1.32  | 0.19225 |
| TESPA1     | 0.16  | 10.05 | 1.32  | 0.19236 |
| GARS1      | 0.08  | 9.47  | 1.32  | 0.19238 |
| CLCN4      | -0.21 | 6.78  | -1.32 | 0.19257 |
| SPIDR      | -0.10 | 8.85  | -1.32 | 0.19271 |
| RECQL5     | 0.09  | 8.74  | 1.32  | 0.19276 |
| AC074117.1 | -0.13 | 5.74  | -1.32 | 0.19276 |
| SQSTM1     | 0.08  | 12.24 | 1.32  | 0.19279 |



|            |       |       |       |         |
|------------|-------|-------|-------|---------|
| WASHC1     | 0.22  | 8.38  | 1.32  | 0.19283 |
| AC118549.1 | -0.13 | 7.24  | -1.32 | 0.19295 |
| PAGR1      | 0.11  | 7.26  | 1.32  | 0.19295 |
| ZFPL1      | 0.09  | 8.42  | 1.32  | 0.19295 |
| AC113367.1 | 0.23  | 8.18  | 1.32  | 0.19296 |
| TRGV9      | -0.19 | 6.16  | -1.32 | 0.19297 |
| SASH1      | -0.22 | 5.58  | -1.32 | 0.19302 |
| HAGH       | 0.23  | 10.98 | 1.32  | 0.19303 |
| ESAM       | 0.19  | 8.09  | 1.32  | 0.19304 |
| AL162424.1 | 0.17  | 6.13  | 1.32  | 0.19305 |
| CHAF1B     | 0.14  | 5.97  | 1.32  | 0.19306 |
| CSTF2T     | -0.08 | 8.91  | -1.32 | 0.19306 |
| CLASRP     | 0.12  | 10.31 | 1.32  | 0.19307 |
| PDE7A      | -0.12 | 9.24  | -1.32 | 0.19314 |
| ZNF622     | 0.11  | 9.37  | 1.32  | 0.19320 |
| DDX46      | 0.13  | 9.52  | 1.32  | 0.19334 |
| AL133367.1 | -0.18 | 5.17  | -1.32 | 0.19336 |
| NSUN4      | 0.10  | 7.92  | 1.32  | 0.19337 |
| CMTM3      | 0.13  | 11.01 | 1.32  | 0.19343 |
| POLL       | 0.20  | 9.75  | 1.32  | 0.19349 |
| RBBP5      | -0.09 | 8.30  | -1.32 | 0.19360 |
| PORCN      | 0.11  | 7.52  | 1.32  | 0.19360 |
| NLRP1      | -0.16 | 12.08 | -1.32 | 0.19368 |
| AC016727.1 | -0.12 | 5.59  | -1.32 | 0.19374 |
| CD86       | -0.14 | 9.30  | -1.32 | 0.19384 |
| SPTSSA     | -0.12 | 7.24  | -1.32 | 0.19388 |
| ZNF644     | -0.13 | 7.30  | -1.32 | 0.19391 |
| EMC3       | 0.17  | 10.72 | 1.32  | 0.19392 |
| FCHO1      | 0.09  | 10.81 | 1.32  | 0.19396 |
| PDE6G      | 0.13  | 6.30  | 1.32  | 0.19400 |
| GMPR2      | -0.11 | 10.09 | -1.32 | 0.19402 |
| FAM171A1   | 0.19  | 6.73  | 1.32  | 0.19404 |
| SNRPD1     | 0.13  | 8.19  | 1.32  | 0.19407 |
| NAIPP1     | -0.16 | 5.72  | -1.32 | 0.19427 |
| PTBP3      | -0.12 | 9.85  | -1.32 | 0.19427 |
| CWC22      | -0.09 | 7.97  | -1.31 | 0.19434 |
| VIM-AS1    | -0.13 | 8.03  | -1.31 | 0.19458 |
| LPAR5      | 0.12  | 8.52  | 1.31  | 0.19465 |
| BTBD6      | 0.10  | 9.18  | 1.31  | 0.19467 |
| MIRLET7BHG | 0.19  | 6.84  | 1.31  | 0.19468 |
| MTPAP      | -0.12 | 7.06  | -1.31 | 0.19470 |
| RPL10P15   | 0.22  | 7.54  | 1.31  | 0.19475 |
| MBD4       | -0.08 | 9.13  | -1.31 | 0.19479 |
| PTMS       | 0.21  | 8.63  | 1.31  | 0.19480 |
| STMN1      | 0.14  | 8.29  | 1.31  | 0.19483 |
| AC103706.1 | 0.14  | 5.49  | 1.31  | 0.19488 |
| USP45      | -0.14 | 5.56  | -1.31 | 0.19489 |
| BARD1      | -0.13 | 5.32  | -1.31 | 0.19489 |
| PYGB       | 0.08  | 10.52 | 1.31  | 0.19491 |
| ZNF689     | 0.10  | 7.87  | 1.31  | 0.19502 |

|            |       |       |       |         |
|------------|-------|-------|-------|---------|
| MANBA      | -0.09 | 9.89  | -1.31 | 0.19516 |
| RIPK1      | -0.08 | 9.98  | -1.31 | 0.19519 |
| SAMD4A     | -0.20 | 5.99  | -1.31 | 0.19521 |
| EBLN2      | 0.18  | 5.37  | 1.31  | 0.19522 |
| PRX        | 0.15  | 6.65  | 1.31  | 0.19524 |
| GKAP1      | 0.12  | 5.86  | 1.31  | 0.19530 |
| SH3PXD2B   | -0.17 | 5.32  | -1.31 | 0.19534 |
| ZNF827     | 0.16  | 6.90  | 1.31  | 0.19538 |
| MPL        | 0.19  | 5.41  | 1.31  | 0.19540 |
| CFLAR      | -0.18 | 11.96 | -1.31 | 0.19547 |
| SNX6P1     | -0.18 | 5.25  | -1.31 | 0.19548 |
| TTC31      | -0.10 | 8.60  | -1.31 | 0.19554 |
| MX1        | -0.37 | 10.80 | -1.31 | 0.19555 |
| LINC01278  | -0.10 | 7.83  | -1.31 | 0.19559 |
| AC099778.1 | 0.16  | 5.52  | 1.31  | 0.19566 |
| FANCA      | -0.16 | 7.99  | -1.31 | 0.19580 |
| BMP2K      | -0.16 | 8.19  | -1.31 | 0.19582 |
| AC019205.1 | 0.14  | 5.31  | 1.31  | 0.19583 |
| TRMU       | 0.15  | 8.59  | 1.31  | 0.19588 |
| RGPD8      | -0.13 | 5.26  | -1.31 | 0.19593 |
| NCK1       | -0.12 | 7.30  | -1.31 | 0.19601 |
| ZNF583     | -0.15 | 5.60  | -1.31 | 0.19617 |
| AL356653.1 | 0.14  | 5.13  | 1.31  | 0.19623 |
| GFM1       | -0.13 | 7.36  | -1.31 | 0.19633 |
| ELOVL7     | -0.19 | 5.83  | -1.31 | 0.19638 |
| PIGW       | -0.15 | 5.30  | -1.31 | 0.19639 |
| AL023653.1 | -0.16 | 5.19  | -1.31 | 0.19663 |
| GLS2       | 0.16  | 5.63  | 1.31  | 0.19663 |
| HBB        | 0.39  | 13.11 | 1.31  | 0.19668 |
| AC015883.1 | 0.21  | 5.17  | 1.31  | 0.19671 |
| AC016712.1 | 0.14  | 5.18  | 1.31  | 0.19673 |
| TRMT13     | -0.14 | 6.27  | -1.31 | 0.19675 |
| THAP1      | -0.12 | 7.00  | -1.31 | 0.19675 |
| SEMA4F     | 0.12  | 6.85  | 1.31  | 0.19678 |
| AC138393.1 | -0.14 | 5.52  | -1.31 | 0.19693 |
| RNF181     | 0.13  | 9.95  | 1.31  | 0.19694 |
| AP5B1      | -0.19 | 11.01 | -1.31 | 0.19700 |
| CHCHD5     | 0.14  | 7.93  | 1.31  | 0.19704 |
| PAIP1      | -0.10 | 7.24  | -1.31 | 0.19718 |
| LINC01134  | -0.12 | 5.09  | -1.31 | 0.19719 |
| CCDC127    | 0.12  | 8.17  | 1.31  | 0.19725 |
| TMCC3      | -0.20 | 9.25  | -1.31 | 0.19727 |
| PF4V1      | 0.25  | 6.73  | 1.31  | 0.19728 |
| PLA2G4C    | 0.27  | 5.93  | 1.31  | 0.19732 |
| URB1       | 0.11  | 8.25  | 1.31  | 0.19740 |
| RICTOR     | -0.17 | 8.53  | -1.31 | 0.19745 |
| OPTN       | 0.18  | 11.59 | 1.31  | 0.19752 |
| ATG9A      | -0.15 | 8.62  | -1.31 | 0.19754 |
| BNIP2      | -0.11 | 9.47  | -1.31 | 0.19754 |
| COL6A1     | 0.20  | 6.14  | 1.31  | 0.19758 |

|                 |       |       |       |         |
|-----------------|-------|-------|-------|---------|
| PIGN            | -0.11 | 6.89  | -1.31 | 0.19763 |
| SNAPC1          | 0.13  | 5.67  | 1.31  | 0.19764 |
| PAN3-AS1        | -0.12 | 5.45  | -1.30 | 0.19775 |
| INKA2           | -0.21 | 10.64 | -1.30 | 0.19775 |
| ATP5F1E         | 0.14  | 11.95 | 1.30  | 0.19787 |
| LSP1            | 0.15  | 14.36 | 1.30  | 0.19790 |
| UTP15           | -0.12 | 6.35  | -1.30 | 0.19794 |
| ERFL            | 0.16  | 5.66  | 1.30  | 0.19821 |
| ANKHD1-EIF4EBP3 | 0.16  | 5.66  | 1.30  | 0.19827 |
| RPL38P4         | 0.17  | 6.82  | 1.30  | 0.19827 |
| GRK5            | 0.08  | 9.19  | 1.30  | 0.19831 |
| NFKB2           | 0.09  | 11.24 | 1.30  | 0.19833 |
| CCT8            | -0.09 | 9.94  | -1.30 | 0.19836 |
| ABHD17B         | -0.12 | 6.62  | -1.30 | 0.19846 |
| MINPP1          | -0.10 | 6.41  | -1.30 | 0.19850 |
| SRP68           | 0.09  | 10.12 | 1.30  | 0.19855 |
| RABL2A          | 0.13  | 6.95  | 1.30  | 0.19874 |
| CARM1           | 0.19  | 10.21 | 1.30  | 0.19877 |
| DDIAS           | -0.12 | 5.72  | -1.30 | 0.19878 |
| BYSL            | 0.17  | 7.14  | 1.30  | 0.19902 |
| GAPT            | -0.12 | 9.26  | -1.30 | 0.19911 |
| ZC3H3           | 0.12  | 9.36  | 1.30  | 0.19912 |
| TSTD2           | -0.12 | 7.06  | -1.30 | 0.19913 |
| HTR6            | 0.27  | 5.49  | 1.30  | 0.19915 |
| AC023157.1      | -0.28 | 8.41  | -1.30 | 0.19926 |
| P2RX4           | 0.13  | 9.07  | 1.30  | 0.19926 |
| DEGS1           | -0.12 | 9.19  | -1.30 | 0.19930 |
| KCTD2           | 0.08  | 9.98  | 1.30  | 0.19941 |
| ZKSCAN7         | -0.16 | 5.44  | -1.30 | 0.19946 |
| GOT2            | 0.09  | 9.34  | 1.30  | 0.19975 |
| CTSA            | 0.12  | 12.38 | 1.30  | 0.19979 |
| PFKFB4          | -0.19 | 10.04 | -1.30 | 0.19990 |
| BX679664.3      | 0.21  | 8.56  | 1.30  | 0.19991 |
| CDH1            | 0.19  | 5.87  | 1.30  | 0.19995 |
| HOOK3           | 0.14  | 8.65  | 1.30  | 0.19997 |
| AGAP4           | -0.21 | 6.60  | -1.30 | 0.20000 |
| TMEM126B        | -0.10 | 7.32  | -1.30 | 0.20004 |
| RETREG3         | 0.07  | 10.09 | 1.30  | 0.20009 |
| DLD             | -0.09 | 8.52  | -1.30 | 0.20019 |
| MRPL38          | 0.18  | 5.83  | 1.30  | 0.20021 |
| PHKG1           | 0.12  | 5.29  | 1.30  | 0.20022 |
| GTF2H1          | -0.09 | 8.21  | -1.30 | 0.20036 |
| SNX4            | -0.09 | 7.15  | -1.30 | 0.20036 |
| CHST11          | -0.12 | 10.72 | -1.30 | 0.20038 |
| ATN1            | 0.12  | 9.12  | 1.30  | 0.20041 |
| MROH8           | 0.17  | 5.07  | 1.30  | 0.20046 |
| PER1            | 0.15  | 9.18  | 1.30  | 0.20056 |
| PRIM1           | -0.13 | 5.75  | -1.30 | 0.20062 |
| C12orf65        | 0.11  | 8.43  | 1.30  | 0.20073 |
| CMTR1           | -0.15 | 10.13 | -1.30 | 0.20078 |

|            |       |       |       |         |
|------------|-------|-------|-------|---------|
| SMG1P5     | -0.12 | 5.05  | -1.30 | 0.20101 |
| SLAIN1     | -0.13 | 6.67  | -1.30 | 0.20105 |
| AL139246.3 | 0.17  | 5.47  | 1.30  | 0.20106 |
| PIK3CD     | -0.11 | 13.07 | -1.29 | 0.20115 |
| INTS2      | -0.15 | 6.22  | -1.29 | 0.20118 |
| AC087501.4 | -0.13 | 5.04  | -1.29 | 0.20119 |
| BIN2       | -0.11 | 12.32 | -1.29 | 0.20129 |
| MRPL14     | 0.15  | 8.68  | 1.29  | 0.20134 |
| ATP5F1A    | 0.09  | 12.08 | 1.29  | 0.20135 |
| ZFHX3      | 0.17  | 7.58  | 1.29  | 0.20160 |
| MCF2L      | 0.15  | 6.67  | 1.29  | 0.20169 |
| LINC01857  | 0.19  | 5.38  | 1.29  | 0.20172 |
| DRAP1      | 0.16  | 10.91 | 1.29  | 0.20180 |
| DAPP1      | -0.13 | 10.07 | -1.29 | 0.20188 |
| HPRT1      | -0.10 | 7.10  | -1.29 | 0.20192 |
| COG5       | -0.12 | 7.56  | -1.29 | 0.20194 |
| CXCL16     | -0.18 | 9.87  | -1.29 | 0.20207 |
| GATD3A     | 0.16  | 6.14  | 1.29  | 0.20221 |
| OSBPL7     | 0.12  | 8.98  | 1.29  | 0.20228 |
| DSP        | -0.36 | 5.63  | -1.29 | 0.20232 |
| AC108673.3 | -0.15 | 5.04  | -1.29 | 0.20238 |
| ZNF382     | -0.14 | 5.37  | -1.29 | 0.20239 |
| COMMD6     | 0.15  | 9.38  | 1.29  | 0.20241 |
| CHCHD7     | 0.08  | 7.84  | 1.29  | 0.20244 |
| PCBP2      | 0.08  | 11.93 | 1.29  | 0.20255 |
| IFRD1      | -0.18 | 8.98  | -1.29 | 0.20259 |
| EPHB1      | -0.17 | 7.42  | -1.29 | 0.20263 |
| SLC35D2    | 0.12  | 6.48  | 1.29  | 0.20271 |
| FYTTD1     | -0.10 | 8.33  | -1.29 | 0.20276 |
| MFSD4B     | 0.16  | 7.09  | 1.29  | 0.20291 |
| ADAM19     | -0.17 | 10.41 | -1.29 | 0.20292 |
| LINC01506  | -0.24 | 7.23  | -1.29 | 0.20301 |
| DPY19L3    | -0.17 | 7.26  | -1.29 | 0.20301 |
| GZMK       | 0.20  | 9.45  | 1.29  | 0.20325 |
| AC046134.2 | 0.15  | 5.15  | 1.29  | 0.20328 |
| STT3B      | -0.10 | 9.33  | -1.29 | 0.20365 |
| AC020904.2 | -0.16 | 5.34  | -1.29 | 0.20365 |
| BIRC3      | 0.14  | 9.54  | 1.29  | 0.20372 |
| IL15       | -0.15 | 6.54  | -1.29 | 0.20379 |
| BICD1      | -0.14 | 5.96  | -1.29 | 0.20382 |
| CCT2       | 0.11  | 9.01  | 1.29  | 0.20395 |
| SCML1      | -0.18 | 5.35  | -1.29 | 0.20404 |
| TMEM120A   | 0.16  | 10.08 | 1.29  | 0.20407 |
| U91328.1   | -0.13 | 5.77  | -1.29 | 0.20408 |
| NFE2L3     | -0.18 | 6.18  | -1.29 | 0.20413 |
| LINC01128  | 0.12  | 7.37  | 1.29  | 0.20419 |
| COPG2      | -0.12 | 7.39  | -1.29 | 0.20426 |
| GTPBP4     | 0.07  | 8.62  | 1.29  | 0.20432 |
| NF1        | -0.11 | 7.96  | -1.29 | 0.20433 |
| AC073072.1 | 0.22  | 5.20  | 1.29  | 0.20440 |

|            |       |       |       |         |
|------------|-------|-------|-------|---------|
| ARHGEF17   | 0.22  | 5.23  | 1.29  | 0.20444 |
| C1D        | -0.12 | 7.11  | -1.29 | 0.20444 |
| TRPV2      | 0.09  | 10.73 | 1.29  | 0.20448 |
| ZNF573     | 0.15  | 5.23  | 1.29  | 0.20450 |
| AC127496.7 | 0.14  | 5.27  | 1.29  | 0.20451 |
| ENTPD1-AS1 | 0.09  | 6.39  | 1.28  | 0.20452 |
| OAS1       | -0.30 | 10.54 | -1.28 | 0.20461 |
| PFKP       | 0.10  | 9.43  | 1.28  | 0.20461 |
| UBN1       | -0.14 | 11.28 | -1.28 | 0.20463 |
| RPL5P1     | 0.20  | 6.91  | 1.28  | 0.20467 |
| CCL28      | -0.13 | 6.30  | -1.28 | 0.20470 |
| AL136295.2 | -0.19 | 6.25  | -1.28 | 0.20480 |
| BAP1       | 0.06  | 10.54 | 1.28  | 0.20486 |
| ZXDA       | -0.13 | 5.32  | -1.28 | 0.20487 |
| MAPKAP1    | 0.07  | 9.72  | 1.28  | 0.20488 |
| AUP1       | 0.08  | 11.15 | 1.28  | 0.20494 |
| PLCG2      | -0.12 | 11.23 | -1.28 | 0.20495 |
| CENPBD1    | 0.12  | 7.63  | 1.28  | 0.20496 |
| ZC3H11B    | -0.17 | 5.67  | -1.28 | 0.20507 |
| ZNF655     | -0.08 | 9.29  | -1.28 | 0.20511 |
| C1orf61    | 0.16  | 5.16  | 1.28  | 0.20518 |
| NSDHL      | 0.12  | 7.93  | 1.28  | 0.20535 |
| TRIB3      | 0.13  | 7.63  | 1.28  | 0.20536 |
| ASAP2      | -0.16 | 5.59  | -1.28 | 0.20549 |
| GLMN       | -0.12 | 5.69  | -1.28 | 0.20550 |
| KYNU       | -0.17 | 7.93  | -1.28 | 0.20571 |
| SC5D       | -0.12 | 6.62  | -1.28 | 0.20575 |
| SFT2D1     | -0.09 | 8.36  | -1.28 | 0.20585 |
| GSTM3      | 0.30  | 6.31  | 1.28  | 0.20591 |
| XRCC3      | 0.12  | 6.89  | 1.28  | 0.20591 |
| IFNGR2     | -0.13 | 11.54 | -1.28 | 0.20592 |
| IGLV3-9    | 0.28  | 5.86  | 1.28  | 0.20594 |
| CASTOR3    | -0.13 | 7.35  | -1.28 | 0.20597 |
| ACAP3      | 0.12  | 9.66  | 1.28  | 0.20601 |
| PTPN1      | -0.08 | 10.29 | -1.28 | 0.20606 |
| AL591846.2 | 0.29  | 6.96  | 1.28  | 0.20607 |
| SERINC2    | 0.28  | 6.85  | 1.28  | 0.20611 |
| TGFB1      | 0.11  | 13.17 | 1.28  | 0.20646 |
| MON1B      | 0.10  | 10.24 | 1.28  | 0.20656 |
| SHKBP1     | 0.16  | 12.70 | 1.28  | 0.20661 |
| WDR45BP1   | -0.15 | 5.07  | -1.28 | 0.20664 |
| HMGA1P4    | 0.17  | 5.49  | 1.28  | 0.20675 |
| KIAA2013   | 0.11  | 10.76 | 1.28  | 0.20677 |
| TREML1     | 0.28  | 9.47  | 1.28  | 0.20680 |
| TOX4       | -0.08 | 9.98  | -1.28 | 0.20688 |
| KIAA0895L  | -0.20 | 6.53  | -1.28 | 0.20698 |
| C8orf33    | 0.09  | 8.59  | 1.28  | 0.20701 |
| GAS2L1     | 0.20  | 8.29  | 1.28  | 0.20708 |
| DPP4       | 0.17  | 7.92  | 1.28  | 0.20715 |
| TBC1D14    | -0.15 | 10.97 | -1.28 | 0.20721 |

|            |       |       |       |         |
|------------|-------|-------|-------|---------|
| LRATD2     | -0.13 | 6.83  | -1.28 | 0.20724 |
| RWDD4      | -0.10 | 6.09  | -1.28 | 0.20733 |
| HNRNPM     | 0.08  | 11.03 | 1.28  | 0.20734 |
| PRR11      | 0.14  | 6.72  | 1.28  | 0.20735 |
| KLHL6      | -0.10 | 8.86  | -1.28 | 0.20743 |
| LARGE1     | -0.14 | 6.30  | -1.28 | 0.20752 |
| SERINC5    | -0.13 | 8.57  | -1.28 | 0.20755 |
| SRP14P1    | 0.14  | 5.42  | 1.28  | 0.20764 |
| SLC25A6P2  | 0.14  | 5.40  | 1.28  | 0.20777 |
| SDCBPP2    | -0.18 | 5.50  | -1.28 | 0.20779 |
| ANXA3      | -0.34 | 8.08  | -1.28 | 0.20779 |
| G6PD       | 0.14  | 12.08 | 1.28  | 0.20783 |
| KLLN       | -0.14 | 4.95  | -1.28 | 0.20783 |
| AC073508.3 | 0.12  | 6.02  | 1.28  | 0.20788 |
| SH3RF3     | 0.19  | 6.72  | 1.28  | 0.20795 |
| KCNAB2     | 0.08  | 11.92 | 1.28  | 0.20798 |
| HLF        | 0.14  | 5.02  | 1.28  | 0.20799 |
| TRMT12     | 0.09  | 7.08  | 1.27  | 0.20802 |
| SGSH       | 0.10  | 9.65  | 1.27  | 0.20802 |
| MAPK3      | 0.12  | 10.59 | 1.27  | 0.20808 |
| ING5       | 0.09  | 9.05  | 1.27  | 0.20822 |
| AL109627.1 | 0.11  | 6.67  | 1.27  | 0.20831 |
| SRA1       | 0.11  | 9.48  | 1.27  | 0.20841 |
| ITK        | -0.17 | 9.75  | -1.27 | 0.20843 |
| DNAL4      | 0.10  | 7.88  | 1.27  | 0.20848 |
| CLDN5      | 0.22  | 7.02  | 1.27  | 0.20859 |
| HCN3       | -0.14 | 5.41  | -1.27 | 0.20859 |
| DDX55      | 0.13  | 7.81  | 1.27  | 0.20865 |
| CYP4F3     | -0.22 | 10.20 | -1.27 | 0.20865 |
| PINX1      | 0.11  | 7.58  | 1.27  | 0.20867 |
| Z74021.1   | 0.21  | 8.68  | 1.27  | 0.20880 |
| SATB1-AS1  | 0.14  | 6.74  | 1.27  | 0.20884 |
| DENND11    | -0.14 | 8.09  | -1.27 | 0.20888 |
| PCID2      | 0.08  | 8.60  | 1.27  | 0.20907 |
| SLC2A14    | -0.29 | 5.91  | -1.27 | 0.20912 |
| MSANTD3    | 0.14  | 6.67  | 1.27  | 0.20912 |
| C1orf54    | 0.14  | 5.69  | 1.27  | 0.20918 |
| PGAP2      | 0.08  | 7.83  | 1.27  | 0.20919 |
| ZFP82      | 0.11  | 6.44  | 1.27  | 0.20928 |
| METTL25    | -0.11 | 5.78  | -1.27 | 0.20929 |
| BCL10      | -0.12 | 7.57  | -1.27 | 0.20934 |
| SMARCC2    | -0.07 | 10.68 | -1.27 | 0.20935 |
| CSNK2A2    | 0.08  | 9.26  | 1.27  | 0.20942 |
| NOP16      | 0.12  | 7.73  | 1.27  | 0.20950 |
| HIC2       | 0.10  | 7.22  | 1.27  | 0.20951 |
| ERMN       | -0.15 | 5.94  | -1.27 | 0.20956 |
| MMP28      | 0.17  | 5.38  | 1.27  | 0.20977 |
| MAK        | -0.23 | 6.76  | -1.27 | 0.20980 |
| AC099560.2 | 0.22  | 9.22  | 1.27  | 0.20981 |
| BLOC1S3    | 0.08  | 9.09  | 1.27  | 0.20986 |

|            |       |       |       |         |
|------------|-------|-------|-------|---------|
| CCDC112    | 0.13  | 6.61  | 1.27  | 0.20987 |
| ZNF674     | -0.12 | 5.59  | -1.27 | 0.21008 |
| ECT2       | -0.15 | 5.11  | -1.27 | 0.21012 |
| MOCS2      | -0.11 | 7.07  | -1.27 | 0.21017 |
| SEPTIN2    | -0.08 | 10.63 | -1.27 | 0.21030 |
| CD99P1     | -0.12 | 6.15  | -1.27 | 0.21040 |
| HNRNPL     | 0.06  | 10.62 | 1.27  | 0.21042 |
| SHLD1      | 0.12  | 7.24  | 1.27  | 0.21072 |
| TUBA4A     | 0.13  | 11.76 | 1.27  | 0.21076 |
| ZSCAN20    | -0.12 | 5.21  | -1.27 | 0.21085 |
| WASF4P     | -0.21 | 5.35  | -1.27 | 0.21091 |
| ITGB5      | 0.20  | 8.47  | 1.27  | 0.21094 |
| TMEM68     | -0.11 | 6.24  | -1.27 | 0.21099 |
| MEF2C      | -0.13 | 8.52  | -1.27 | 0.21103 |
| PSMD13     | 0.08  | 10.93 | 1.27  | 0.21105 |
| NSG1       | 0.27  | 7.99  | 1.27  | 0.21114 |
| EMC9       | 0.13  | 6.90  | 1.27  | 0.21118 |
| SRSF5      | -0.11 | 11.42 | -1.27 | 0.21119 |
| DAZAP2     | -0.10 | 13.06 | -1.27 | 0.21131 |
| CASC4      | -0.11 | 8.21  | -1.27 | 0.21133 |
| CAD        | 0.09  | 9.62  | 1.26  | 0.21163 |
| TRAF4      | 0.14  | 7.68  | 1.26  | 0.21165 |
| FAM104A    | 0.15  | 9.45  | 1.26  | 0.21167 |
| TIMM9      | 0.14  | 7.37  | 1.26  | 0.21169 |
| DHRS4      | 0.13  | 7.87  | 1.26  | 0.21170 |
| LUC7L3     | 0.18  | 10.42 | 1.26  | 0.21198 |
| RRP15      | -0.14 | 6.56  | -1.26 | 0.21214 |
| TTC24      | -0.18 | 5.16  | -1.26 | 0.21221 |
| AL645568.1 | 0.16  | 6.55  | 1.26  | 0.21230 |
| AL031777.1 | -0.15 | 5.37  | -1.26 | 0.21242 |
| TTC19      | 0.10  | 7.73  | 1.26  | 0.21248 |
| GNPTG      | 0.10  | 10.11 | 1.26  | 0.21256 |
| PCIF1      | 0.07  | 10.76 | 1.26  | 0.21285 |
| SNHG7      | 0.17  | 8.38  | 1.26  | 0.21296 |
| NMNAT1     | 0.10  | 7.01  | 1.26  | 0.21302 |
| TYW3       | -0.11 | 7.08  | -1.26 | 0.21302 |
| ORC2       | -0.11 | 7.47  | -1.26 | 0.21307 |
| UBE2D3     | -0.11 | 11.55 | -1.26 | 0.21310 |
| TATDN3     | -0.09 | 7.06  | -1.26 | 0.21312 |
| PLEKHF1    | 0.16  | 9.02  | 1.26  | 0.21313 |
| NAT8B      | 0.17  | 5.94  | 1.26  | 0.21318 |
| SLC24A4    | -0.15 | 9.29  | -1.26 | 0.21322 |
| MAU2       | -0.11 | 10.72 | -1.26 | 0.21325 |
| ENTR1      | 0.09  | 8.80  | 1.26  | 0.21325 |
| PIGM       | 0.15  | 7.65  | 1.26  | 0.21326 |
| MYCL       | -0.16 | 8.77  | -1.26 | 0.21327 |
| ZNF12      | -0.09 | 7.89  | -1.26 | 0.21329 |
| VNN3       | -0.21 | 9.01  | -1.26 | 0.21334 |
| BLVRB      | 0.25  | 11.23 | 1.26  | 0.21345 |
| CHST8      | -0.17 | 4.96  | -1.26 | 0.21349 |

|            |       |       |       |         |
|------------|-------|-------|-------|---------|
| RGPD5      | -0.15 | 5.19  | -1.26 | 0.21365 |
| RAVER1     | 0.12  | 8.51  | 1.26  | 0.21366 |
| BCL9L      | 0.11  | 11.11 | 1.26  | 0.21366 |
| AGRN       | -0.26 | 6.18  | -1.26 | 0.21371 |
| FAM120C    | -0.11 | 6.09  | -1.26 | 0.21375 |
| RBM33      | -0.12 | 10.17 | -1.26 | 0.21390 |
| MAN1A1     | -0.18 | 8.08  | -1.26 | 0.21399 |
| CACNA1I    | 0.19  | 8.21  | 1.26  | 0.21407 |
| AGPAT1     | 0.09  | 10.74 | 1.26  | 0.21428 |
| AC004890.2 | 0.16  | 5.29  | 1.26  | 0.21428 |
| ZNF782     | -0.14 | 5.55  | -1.26 | 0.21438 |
| ATP13A1    | 0.10  | 10.53 | 1.26  | 0.21444 |
| AC018868.1 | 0.14  | 6.07  | 1.26  | 0.21446 |
| KHSRP      | 0.10  | 10.00 | 1.26  | 0.21453 |
| HK1        | 0.08  | 11.74 | 1.26  | 0.21466 |
| KLHL3      | -0.17 | 6.18  | -1.26 | 0.21470 |
| AC004224.1 | 0.17  | 6.35  | 1.26  | 0.21484 |
| RNF24      | -0.20 | 11.21 | -1.26 | 0.21498 |
| ATF5       | 0.17  | 7.83  | 1.26  | 0.21503 |
| NEDD4L     | 0.20  | 6.83  | 1.26  | 0.21511 |
| TCAIM      | -0.10 | 6.74  | -1.25 | 0.21517 |
| PYCARD     | 0.15  | 11.03 | 1.25  | 0.21528 |
| PCED1A     | 0.14  | 9.23  | 1.25  | 0.21531 |
| IGKV1-9    | 0.27  | 6.88  | 1.25  | 0.21544 |
| FAM3C      | -0.11 | 6.38  | -1.25 | 0.21555 |
| POM121B    | -0.14 | 5.40  | -1.25 | 0.21561 |
| SGK1       | -0.14 | 9.63  | -1.25 | 0.21586 |
| DENND2C    | -0.13 | 5.14  | -1.25 | 0.21587 |
| TBC1D30    | -0.17 | 6.10  | -1.25 | 0.21598 |
| SRPRA      | -0.06 | 11.32 | -1.25 | 0.21603 |
| PRDM5      | -0.17 | 5.29  | -1.25 | 0.21612 |
| RPL7P1     | 0.18  | 8.57  | 1.25  | 0.21625 |
| TNXB       | 0.16  | 5.84  | 1.25  | 0.21633 |
| MST1P2     | 0.22  | 5.61  | 1.25  | 0.21648 |
| CYBA       | 0.14  | 13.26 | 1.25  | 0.21664 |
| RPL7P32    | 0.09  | 5.56  | 1.25  | 0.21667 |
| CUL3       | -0.09 | 9.70  | -1.25 | 0.21672 |
| SNX16      | -0.15 | 5.44  | -1.25 | 0.21676 |
| AC040160.3 | 0.22  | 5.35  | 1.25  | 0.21678 |
| EPOP       | -0.15 | 5.08  | -1.25 | 0.21686 |
| DDX50      | 0.08  | 8.88  | 1.25  | 0.21687 |
| TCEANC2    | 0.07  | 7.92  | 1.25  | 0.21692 |
| MAP3K4     | -0.10 | 8.57  | -1.25 | 0.21700 |
| AIFM3      | 0.19  | 6.66  | 1.25  | 0.21703 |
| RASGEF1B   | -0.12 | 6.50  | -1.25 | 0.21707 |
| POMGNT1    | 0.09  | 8.85  | 1.25  | 0.21708 |
| RBIS       | 0.12  | 7.80  | 1.25  | 0.21715 |
| ZBED4      | -0.11 | 8.23  | -1.25 | 0.21727 |
| RUFY1      | 0.10  | 10.50 | 1.25  | 0.21729 |
| ORAI3      | 0.12  | 7.56  | 1.25  | 0.21733 |



|            |       |       |       |         |
|------------|-------|-------|-------|---------|
| SLC1A4     | -0.16 | 7.72  | -1.25 | 0.21736 |
| RAP2B      | -0.07 | 10.10 | -1.25 | 0.21740 |
| U2AF2      | 0.07  | 11.85 | 1.25  | 0.21742 |
| IKBIP      | -0.16 | 8.09  | -1.25 | 0.21746 |
| FAM110B    | -0.16 | 5.70  | -1.25 | 0.21750 |
| RHPN1      | 0.21  | 6.99  | 1.25  | 0.21751 |
| SLC22A4    | -0.23 | 7.96  | -1.25 | 0.21755 |
| MAP3K11    | 0.12  | 11.62 | 1.25  | 0.21760 |
| LY9        | 0.11  | 9.77  | 1.25  | 0.21764 |
| FUT11      | 0.14  | 8.99  | 1.25  | 0.21774 |
| HUS1       | -0.08 | 7.19  | -1.25 | 0.21782 |
| RPS4XP11   | 0.19  | 6.78  | 1.25  | 0.21783 |
| KLHL26     | 0.08  | 7.42  | 1.25  | 0.21785 |
| AXIN1      | 0.07  | 10.20 | 1.25  | 0.21794 |
| ZNF432     | 0.14  | 6.36  | 1.25  | 0.21801 |
| NRADDP     | -0.18 | 5.68  | -1.25 | 0.21805 |
| LINC02132  | 0.17  | 5.31  | 1.25  | 0.21813 |
| ERP44      | -0.09 | 9.46  | -1.25 | 0.21815 |
| MRPL27     | 0.14  | 8.31  | 1.25  | 0.21816 |
| CLEC4E     | -0.27 | 10.20 | -1.25 | 0.21822 |
| DYNC1H1    | -0.07 | 11.90 | -1.25 | 0.21825 |
| DERL1      | -0.06 | 9.59  | -1.25 | 0.21825 |
| EEF1A1P8   | -0.10 | 5.36  | -1.25 | 0.21830 |
| BCL2L13    | -0.10 | 9.12  | -1.25 | 0.21831 |
| ZNF365     | -0.15 | 5.01  | -1.25 | 0.21833 |
| RNFT2      | 0.16  | 5.92  | 1.25  | 0.21835 |
| DCPS       | 0.10  | 8.93  | 1.25  | 0.21840 |
| RFWD3      | -0.11 | 7.90  | -1.25 | 0.21841 |
| UBE2D2     | 0.09  | 9.91  | 1.25  | 0.21842 |
| GVQW3      | -0.15 | 5.52  | -1.25 | 0.21848 |
| AC012645.3 | 0.14  | 6.16  | 1.25  | 0.21850 |
| CDC42EP3   | -0.14 | 10.47 | -1.25 | 0.21863 |
| SDHA       | 0.10  | 7.63  | 1.25  | 0.21870 |
| KIFBP      | -0.10 | 6.58  | -1.25 | 0.21874 |
| CLN6       | 0.13  | 8.00  | 1.24  | 0.21882 |
| NSL1       | -0.07 | 8.24  | -1.24 | 0.21889 |
| AL021707.1 | -0.20 | 5.40  | -1.24 | 0.21905 |
| Z69706.1   | 0.15  | 5.32  | 1.24  | 0.21914 |
| DHODH      | 0.10  | 6.98  | 1.24  | 0.21915 |
| COQ2       | -0.12 | 6.78  | -1.24 | 0.21918 |
| USP21      | 0.06  | 9.10  | 1.24  | 0.21942 |
| RHD        | -0.22 | 5.05  | -1.24 | 0.21943 |
| RBM7       | -0.11 | 7.24  | -1.24 | 0.21943 |
| DCTN5      | 0.09  | 9.61  | 1.24  | 0.21951 |
| MRTFB      | -0.12 | 5.91  | -1.24 | 0.21952 |
| MPIG6B     | 0.21  | 9.04  | 1.24  | 0.21958 |
| SFXN1      | 0.11  | 8.15  | 1.24  | 0.21964 |
| GALNT1     | -0.11 | 8.35  | -1.24 | 0.21968 |
| PAK6       | -0.16 | 5.60  | -1.24 | 0.21973 |
| ZNF675     | -0.13 | 5.96  | -1.24 | 0.21974 |

|            |       |       |       |         |
|------------|-------|-------|-------|---------|
| ICK        | -0.13 | 6.52  | -1.24 | 0.21976 |
| AL512633.1 | -0.20 | 5.40  | -1.24 | 0.21978 |
| SREK1      | 0.13  | 8.44  | 1.24  | 0.21980 |
| SYNPO      | 0.13  | 6.83  | 1.24  | 0.21981 |
| EBNA1BP2   | 0.10  | 8.69  | 1.24  | 0.21981 |
| NAT1       | -0.12 | 6.02  | -1.24 | 0.21989 |
| TIFA       | -0.11 | 7.54  | -1.24 | 0.21994 |
| PRSS33     | 0.33  | 7.52  | 1.24  | 0.21997 |
| SHISA7     | 0.23  | 5.25  | 1.24  | 0.22005 |
| IGHV3-11   | 0.26  | 6.90  | 1.24  | 0.22007 |
| CRB3       | 0.13  | 4.96  | 1.24  | 0.22011 |
| POFUT2     | -0.11 | 8.54  | -1.24 | 0.22013 |
| ATP1B3     | -0.10 | 9.21  | -1.24 | 0.22014 |
| PTGIR      | 0.14  | 7.99  | 1.24  | 0.22015 |
| AHCY       | 0.10  | 9.07  | 1.24  | 0.22032 |
| MECR       | 0.11  | 7.20  | 1.24  | 0.22033 |
| ST3GAL3    | 0.14  | 5.70  | 1.24  | 0.22062 |
| PREX1      | -0.17 | 13.36 | -1.24 | 0.22073 |
| TMEM168    | -0.12 | 7.17  | -1.24 | 0.22083 |
| MFSD2B     | 0.26  | 7.02  | 1.24  | 0.22084 |
| ARL2BP     | -0.08 | 9.06  | -1.24 | 0.22103 |
| LACC1      | -0.11 | 5.22  | -1.24 | 0.22105 |
| PSMB6      | 0.12  | 9.80  | 1.24  | 0.22108 |
| HNRNPDL    | -0.08 | 10.62 | -1.24 | 0.22110 |
| RIPOR2     | -0.14 | 12.78 | -1.24 | 0.22110 |
| ATG16L2    | -0.21 | 13.33 | -1.24 | 0.22113 |
| TNPO2      | 0.09  | 9.66  | 1.24  | 0.22118 |
| ERP29P1    | 0.15  | 5.80  | 1.24  | 0.22127 |
| RBM5       | -0.10 | 11.61 | -1.24 | 0.22131 |
| NISCH      | 0.09  | 10.92 | 1.24  | 0.22143 |
| TTC30B     | -0.12 | 5.33  | -1.24 | 0.22154 |
| ZNF609     | -0.10 | 9.22  | -1.24 | 0.22167 |
| HARS2      | -0.07 | 8.87  | -1.24 | 0.22169 |
| RPS12      | 0.14  | 14.04 | 1.24  | 0.22175 |
| LRRC28     | 0.13  | 7.57  | 1.24  | 0.22181 |
| FBXO5      | -0.12 | 5.91  | -1.24 | 0.22190 |
| AP4M1      | 0.11  | 7.45  | 1.24  | 0.22191 |
| AC007688.2 | 0.18  | 7.14  | 1.24  | 0.22207 |
| PIGK       | -0.10 | 7.08  | -1.24 | 0.22209 |
| ATP6V0CP3  | 0.15  | 5.20  | 1.24  | 0.22211 |
| ABHD4      | -0.12 | 9.62  | -1.24 | 0.22220 |
| AL160272.1 | -0.17 | 5.27  | -1.24 | 0.22221 |
| HCAR3      | -0.22 | 9.94  | -1.24 | 0.22226 |
| PNPLA2     | 0.14  | 11.88 | 1.24  | 0.22232 |
| RAE1       | 0.08  | 9.15  | 1.24  | 0.22234 |
| DNAJB9     | -0.10 | 6.90  | -1.23 | 0.22245 |
| COPS7A     | 0.08  | 9.54  | 1.23  | 0.22247 |
| KIAA0513   | -0.11 | 11.20 | -1.23 | 0.22249 |
| SMIM27     | 0.13  | 7.75  | 1.23  | 0.22251 |
| IARS2      | -0.10 | 8.46  | -1.23 | 0.22268 |

|            |       |       |       |         |
|------------|-------|-------|-------|---------|
| LINC01127  | -0.28 | 8.07  | -1.23 | 0.22268 |
| ICOS       | 0.14  | 6.98  | 1.23  | 0.22269 |
| ANKRD49    | -0.09 | 7.50  | -1.23 | 0.22282 |
| AL691432.4 | 0.13  | 5.56  | 1.23  | 0.22299 |
| B4GALNT3   | 0.36  | 6.43  | 1.23  | 0.22301 |
| RGL1       | -0.19 | 5.80  | -1.23 | 0.22301 |
| AF241726.1 | 0.18  | 5.54  | 1.23  | 0.22318 |
| NUDT19     | -0.09 | 6.56  | -1.23 | 0.22323 |
| AC092683.1 | 0.15  | 5.38  | 1.23  | 0.22324 |
| AC244157.2 | -0.17 | 5.10  | -1.23 | 0.22335 |
| GALNT11    | -0.08 | 8.36  | -1.23 | 0.22337 |
| ADGRE2     | -0.19 | 10.92 | -1.23 | 0.22345 |
| PPIA       | 0.12  | 12.61 | 1.23  | 0.22356 |
| DHFR       | 0.14  | 6.64  | 1.23  | 0.22361 |
| UBL7-AS1   | 0.12  | 6.23  | 1.23  | 0.22363 |
| RNF216     | 0.07  | 10.11 | 1.23  | 0.22378 |
| UBASH3B    | -0.10 | 8.13  | -1.23 | 0.22383 |
| ABCB7      | -0.08 | 7.65  | -1.23 | 0.22386 |
| ZNF561-AS1 | 0.12  | 5.43  | 1.23  | 0.22388 |
| SLC19A2    | -0.13 | 5.09  | -1.23 | 0.22406 |
| KIF2A      | -0.12 | 7.67  | -1.23 | 0.22411 |
| PHLDB2     | -0.14 | 5.61  | -1.23 | 0.22421 |
| TKTL1      | 0.20  | 7.26  | 1.23  | 0.22432 |
| C6orf136   | 0.08  | 7.67  | 1.23  | 0.22453 |
| GSK3B      | -0.11 | 9.06  | -1.23 | 0.22454 |
| TMEM44     | 0.14  | 5.37  | 1.23  | 0.22465 |
| DNASE1L3   | 0.14  | 5.62  | 1.23  | 0.22473 |
| CCDC189    | -0.14 | 6.54  | -1.23 | 0.22476 |
| SLC38A5    | 0.23  | 9.84  | 1.23  | 0.22491 |
| ARRDC1     | 0.11  | 9.98  | 1.23  | 0.22495 |
| EZH1       | -0.10 | 10.54 | -1.23 | 0.22496 |
| BACE1      | -0.12 | 6.31  | -1.23 | 0.22508 |
| CKS2       | 0.15  | 5.58  | 1.23  | 0.22510 |
| HNRNPKP4   | -0.18 | 7.74  | -1.23 | 0.22522 |
| AUTS2      | -0.13 | 8.06  | -1.23 | 0.22531 |
| CAPN1      | 0.09  | 11.77 | 1.23  | 0.22533 |
| PEG10      | -0.13 | 5.19  | -1.23 | 0.22540 |
| ERMP1      | -0.11 | 7.51  | -1.23 | 0.22543 |
| MT-ATP8    | -0.14 | 9.87  | -1.23 | 0.22544 |
| TIMMDC1    | -0.06 | 8.64  | -1.23 | 0.22546 |
| STK38      | -0.07 | 11.62 | -1.23 | 0.22550 |
| GPR155     | 0.16  | 9.15  | 1.23  | 0.22555 |
| TGOLN2     | -0.08 | 12.34 | -1.23 | 0.22558 |
| ABL2       | 0.10  | 7.97  | 1.23  | 0.22558 |
| DNAJC8     | 0.09  | 10.01 | 1.23  | 0.22559 |
| LINC02218  | -0.20 | 5.96  | -1.23 | 0.22561 |
| AL136126.1 | 0.17  | 7.60  | 1.23  | 0.22562 |
| CPSF1      | 0.12  | 10.86 | 1.23  | 0.22563 |
| CCDC17     | -0.20 | 6.77  | -1.23 | 0.22567 |
| EIF3A      | -0.10 | 10.71 | -1.23 | 0.22580 |

|            |       |       |       |         |
|------------|-------|-------|-------|---------|
| TMEM192    | 0.12  | 7.61  | 1.23  | 0.22597 |
| NMT2       | 0.14  | 8.45  | 1.23  | 0.22605 |
| PLCD3      | -0.13 | 6.03  | -1.22 | 0.22619 |
| GFI1       | -0.13 | 7.91  | -1.22 | 0.22636 |
| SCAF11     | -0.11 | 9.80  | -1.22 | 0.22656 |
| VPS26A     | -0.09 | 8.17  | -1.22 | 0.22660 |
| AC073861.1 | 0.19  | 9.57  | 1.22  | 0.22661 |
| UBA2       | -0.10 | 8.72  | -1.22 | 0.22662 |
| BX248409.1 | 0.13  | 5.22  | 1.22  | 0.22678 |
| AL590560.3 | 0.23  | 5.22  | 1.22  | 0.22683 |
| REEP3      | -0.10 | 7.01  | -1.22 | 0.22683 |
| UHRF1BP1   | -0.12 | 6.84  | -1.22 | 0.22690 |
| HAVCR2     | -0.12 | 8.74  | -1.22 | 0.22701 |
| THAP8      | 0.13  | 6.69  | 1.22  | 0.22705 |
| RPS27P21   | 0.11  | 5.49  | 1.22  | 0.22712 |
| ABCG1      | -0.16 | 9.12  | -1.22 | 0.22738 |
| LINC01146  | -0.14 | 5.01  | -1.22 | 0.22738 |
| MRPS9      | 0.11  | 7.91  | 1.22  | 0.22753 |
| KLKB1      | 0.14  | 4.98  | 1.22  | 0.22757 |
| CCAR1      | 0.16  | 9.50  | 1.22  | 0.22764 |
| PLEC       | 0.12  | 12.60 | 1.22  | 0.22765 |
| CCDC88B    | 0.13  | 12.03 | 1.22  | 0.22775 |
| GAPDHP60   | 0.15  | 6.62  | 1.22  | 0.22776 |
| GLULP3     | -0.18 | 5.46  | -1.22 | 0.22783 |
| TSPAN31    | -0.08 | 8.09  | -1.22 | 0.22791 |
| CENPU      | -0.14 | 5.29  | -1.22 | 0.22797 |
| RAB34      | 0.18  | 8.13  | 1.22  | 0.22799 |
| TRBV20-1   | 0.19  | 8.41  | 1.22  | 0.22799 |
| AL109741.2 | 0.17  | 6.02  | 1.22  | 0.22804 |
| FLNA       | 0.09  | 15.09 | 1.22  | 0.22809 |
| EIF3M      | 0.10  | 10.22 | 1.22  | 0.22810 |
| AC021074.1 | 0.21  | 7.83  | 1.22  | 0.22839 |
| EGLN2      | -0.19 | 7.78  | -1.22 | 0.22841 |
| C1orf198   | 0.10  | 6.84  | 1.22  | 0.22844 |
| BBOF1      | 0.24  | 6.97  | 1.22  | 0.22845 |
| RTN4R      | 0.14  | 5.67  | 1.22  | 0.22852 |
| SP140L     | -0.11 | 8.62  | -1.22 | 0.22858 |
| APLF       | 0.12  | 5.22  | 1.22  | 0.22865 |
| IGLV3-19   | 0.27  | 7.11  | 1.22  | 0.22866 |
| AFDN       | -0.19 | 6.43  | -1.22 | 0.22866 |
| PPP4R3B    | -0.10 | 8.88  | -1.22 | 0.22867 |
| FKRP       | 0.09  | 7.47  | 1.22  | 0.22870 |
| ASB8       | 0.10  | 9.82  | 1.22  | 0.22871 |
| NDUFB1     | 0.12  | 8.28  | 1.22  | 0.22872 |
| SLC4A2     | 0.09  | 9.66  | 1.22  | 0.22875 |
| MTMR11     | -0.13 | 8.09  | -1.22 | 0.22885 |
| LINC00570  | 0.27  | 6.26  | 1.22  | 0.22897 |
| TTC26      | -0.17 | 5.35  | -1.22 | 0.22899 |
| MAMLD1     | -0.15 | 5.14  | -1.22 | 0.22905 |
| NXF1       | -0.10 | 10.76 | -1.22 | 0.22913 |

|            |       |       |       |         |
|------------|-------|-------|-------|---------|
| EXOC3      | 0.07  | 11.03 | 1.22  | 0.22913 |
| IGHV5-51   | 0.26  | 7.97  | 1.22  | 0.22914 |
| RPL8P2     | 0.15  | 5.76  | 1.22  | 0.22915 |
| ZNF737     | -0.13 | 6.62  | -1.22 | 0.22917 |
| ATP5F1B    | 0.07  | 12.39 | 1.22  | 0.22927 |
| PDCD11     | 0.07  | 9.67  | 1.22  | 0.22927 |
| SLC37A1    | 0.09  | 8.60  | 1.22  | 0.22939 |
| ZNF362     | 0.07  | 8.85  | 1.22  | 0.22944 |
| ZBTB24     | 0.12  | 7.54  | 1.22  | 0.22945 |
| TMTC3      | -0.12 | 5.36  | -1.22 | 0.22949 |
| HKDC1      | 0.19  | 6.72  | 1.22  | 0.22953 |
| MRPS31     | -0.09 | 7.40  | -1.22 | 0.22976 |
| DIS3L2     | 0.08  | 8.15  | 1.22  | 0.22977 |
| DUSP4      | -0.13 | 5.41  | -1.21 | 0.22992 |
| LRP1       | -0.16 | 12.69 | -1.21 | 0.22997 |
| EFCAB12    | -0.16 | 5.72  | -1.21 | 0.23001 |
| UHMK1      | -0.11 | 8.82  | -1.21 | 0.23002 |
| CTCF       | -0.08 | 9.73  | -1.21 | 0.23004 |
| KCNA3      | -0.11 | 7.05  | -1.21 | 0.23004 |
| ITFG2      | 0.08  | 8.91  | 1.21  | 0.23020 |
| CHST7      | 0.13  | 7.82  | 1.21  | 0.23025 |
| SMIM1      | 0.29  | 6.49  | 1.21  | 0.23038 |
| ADAT1      | 0.10  | 8.02  | 1.21  | 0.23049 |
| PTMAP12    | 0.08  | 4.94  | 1.21  | 0.23054 |
| TCL1A      | 0.30  | 9.29  | 1.21  | 0.23054 |
| PPP4C      | 0.11  | 11.84 | 1.21  | 0.23061 |
| INPP5A     | -0.13 | 8.44  | -1.21 | 0.23062 |
| KIF3A      | -0.12 | 6.03  | -1.21 | 0.23075 |
| EDARADD    | 0.16  | 5.91  | 1.21  | 0.23077 |
| ZRSR2      | 0.12  | 8.32  | 1.21  | 0.23078 |
| GAPDHP35   | 0.17  | 5.21  | 1.21  | 0.23081 |
| IKZF1      | -0.09 | 11.49 | -1.21 | 0.23082 |
| ZBTB3      | 0.13  | 7.07  | 1.21  | 0.23104 |
| BCDIN3D    | 0.09  | 6.99  | 1.21  | 0.23108 |
| ANKRD16    | 0.12  | 5.94  | 1.21  | 0.23115 |
| C12orf76   | -0.10 | 7.43  | -1.21 | 0.23117 |
| EIF2B5     | 0.07  | 9.72  | 1.21  | 0.23141 |
| DDX1       | -0.08 | 8.44  | -1.21 | 0.23146 |
| SNRPF1     | 0.14  | 5.32  | 1.21  | 0.23150 |
| CALCO1     | -0.11 | 11.17 | -1.21 | 0.23159 |
| CDADC1     | -0.11 | 6.37  | -1.21 | 0.23190 |
| CYFIP2     | 0.06  | 12.29 | 1.21  | 0.23204 |
| AC093323.1 | 0.11  | 8.41  | 1.21  | 0.23209 |
| CNOT6L     | -0.09 | 9.04  | -1.21 | 0.23209 |
| KCTD3      | -0.13 | 5.43  | -1.21 | 0.23261 |
| RIMBP3B    | 0.12  | 5.11  | 1.21  | 0.23265 |
| ACSS2      | -0.10 | 9.40  | -1.21 | 0.23268 |
| MT-TM      | 0.23  | 7.13  | 1.21  | 0.23277 |
| LRR1       | -0.09 | 6.65  | -1.21 | 0.23283 |
| TOPORS     | -0.13 | 7.81  | -1.21 | 0.23284 |

|            |       |       |       |         |
|------------|-------|-------|-------|---------|
| SH2D2A     | 0.17  | 9.66  | 1.21  | 0.23298 |
| COX4I1P1   | 0.14  | 5.98  | 1.21  | 0.23303 |
| FASTKD3    | -0.10 | 6.05  | -1.21 | 0.23305 |
| TWSG1      | -0.13 | 5.65  | -1.21 | 0.23307 |
| HINFP      | 0.07  | 8.67  | 1.21  | 0.23322 |
| MTOR       | -0.09 | 9.32  | -1.21 | 0.23325 |
| C2orf49    | -0.10 | 7.13  | -1.21 | 0.23348 |
| AC114980.1 | 0.13  | 5.35  | 1.21  | 0.23351 |
| WEE1       | -0.13 | 6.27  | -1.21 | 0.23356 |
| MTSS1      | -0.12 | 9.05  | -1.20 | 0.23370 |
| EPHB2      | -0.17 | 6.41  | -1.20 | 0.23380 |
| AC063952.2 | 0.12  | 5.77  | 1.20  | 0.23390 |
| CRYZ       | -0.13 | 6.72  | -1.20 | 0.23394 |
| AL009179.2 | -0.17 | 5.09  | -1.20 | 0.23395 |
| PRSS36     | 0.14  | 6.00  | 1.20  | 0.23395 |
| ELAC2      | 0.07  | 9.93  | 1.20  | 0.23419 |
| SCIMP      | -0.13 | 9.48  | -1.20 | 0.23427 |
| AC010210.1 | -0.16 | 5.28  | -1.20 | 0.23437 |
| NUDT8      | -0.15 | 5.09  | -1.20 | 0.23441 |
| AC012146.1 | 0.12  | 5.79  | 1.20  | 0.23450 |
| TMOD1      | 0.30  | 8.48  | 1.20  | 0.23454 |
| UBE2SP1    | 0.11  | 5.01  | 1.20  | 0.23456 |
| VPS37C     | -0.12 | 8.96  | -1.20 | 0.23457 |
| TRIB2      | -0.13 | 9.02  | -1.20 | 0.23462 |
| ATOX1      | 0.12  | 7.92  | 1.20  | 0.23468 |
| DDX39B     | -0.19 | 10.41 | -1.20 | 0.23484 |
| ZNF767P    | -0.13 | 8.15  | -1.20 | 0.23488 |
| ADM        | -0.24 | 9.10  | -1.20 | 0.23516 |
| SMC6       | -0.12 | 7.34  | -1.20 | 0.23525 |
| PRIMPOL    | -0.11 | 6.42  | -1.20 | 0.23530 |
| CD52       | 0.18  | 12.65 | 1.20  | 0.23546 |
| RIPOR1     | -0.09 | 10.44 | -1.20 | 0.23547 |
| TSC2       | 0.08  | 10.77 | 1.20  | 0.23548 |
| FOLR2      | -0.15 | 6.82  | -1.20 | 0.23569 |
| PLXNA2     | -0.16 | 7.15  | -1.20 | 0.23569 |
| ZNF608     | -0.24 | 5.24  | -1.20 | 0.23573 |
| ATAD3B     | 0.14  | 8.03  | 1.20  | 0.23573 |
| ETNK2      | 0.11  | 5.56  | 1.20  | 0.23577 |
| PROSER2    | 0.12  | 5.93  | 1.20  | 0.23578 |
| HNRNPUL2   | 0.09  | 9.74  | 1.20  | 0.23582 |
| RNF44      | -0.10 | 11.24 | -1.20 | 0.23582 |
| TNNT1      | 0.30  | 6.16  | 1.20  | 0.23582 |
| AC079781.5 | 0.11  | 5.44  | 1.20  | 0.23587 |
| HMG20A     | -0.08 | 8.22  | -1.20 | 0.23588 |
| AC080112.2 | 0.12  | 5.13  | 1.20  | 0.23598 |
| PTBP1P     | -0.13 | 5.36  | -1.20 | 0.23603 |
| PSMD3      | 0.09  | 9.85  | 1.20  | 0.23609 |
| RPL5P17    | 0.18  | 7.23  | 1.20  | 0.23613 |
| CEBPZOS    | 0.12  | 7.68  | 1.20  | 0.23644 |
| RPL10AP2   | 0.15  | 6.53  | 1.20  | 0.23648 |

|            |       |       |       |         |
|------------|-------|-------|-------|---------|
| XXYLT1     | 0.09  | 7.50  | 1.20  | 0.23649 |
| MYOF       | -0.22 | 8.00  | -1.20 | 0.23649 |
| CYBRD1     | -0.21 | 8.03  | -1.20 | 0.23658 |
| MTFMT      | -0.10 | 6.97  | -1.20 | 0.23662 |
| DNAH10     | -0.18 | 5.09  | -1.20 | 0.23669 |
| SEPSECS    | -0.13 | 6.41  | -1.20 | 0.23685 |
| RPS29P5    | 0.14  | 5.82  | 1.20  | 0.23692 |
| KIAA0040   | -0.14 | 10.60 | -1.20 | 0.23702 |
| DOK1       | 0.11  | 10.20 | 1.20  | 0.23704 |
| CRIP1P4    | 0.17  | 6.65  | 1.20  | 0.23706 |
| FAM30A     | 0.16  | 8.02  | 1.20  | 0.23707 |
| INTS9      | 0.09  | 8.69  | 1.20  | 0.23721 |
| LINC01347  | -0.17 | 5.66  | -1.20 | 0.23722 |
| RPL10P7    | 0.13  | 5.45  | 1.20  | 0.23726 |
| ECRG4      | 0.15  | 4.96  | 1.20  | 0.23739 |
| CENPX      | 0.12  | 7.93  | 1.20  | 0.23743 |
| CCNA2      | -0.14 | 4.94  | -1.20 | 0.23745 |
| MTHFR      | 0.08  | 9.74  | 1.20  | 0.23749 |
| LGALS12    | 0.18  | 8.14  | 1.20  | 0.23752 |
| TIMM17A    | -0.09 | 8.16  | -1.19 | 0.23755 |
| TMIE       | 0.15  | 5.19  | 1.19  | 0.23762 |
| NOP10      | 0.15  | 10.54 | 1.19  | 0.23763 |
| PLK4       | -0.09 | 4.98  | -1.19 | 0.23765 |
| PDZD4      | 0.16  | 9.92  | 1.19  | 0.23767 |
| EPHA1      | 0.18  | 7.82  | 1.19  | 0.23778 |
| STAMBP     | -0.08 | 8.50  | -1.19 | 0.23785 |
| YPEL5      | -0.12 | 10.48 | -1.19 | 0.23786 |
| TRBV7-3    | 0.22  | 6.23  | 1.19  | 0.23790 |
| VPS39      | -0.07 | 10.66 | -1.19 | 0.23803 |
| CD74       | 0.16  | 16.13 | 1.19  | 0.23810 |
| MGAT2      | -0.09 | 8.40  | -1.19 | 0.23824 |
| PPP3CA     | -0.12 | 9.11  | -1.19 | 0.23829 |
| MVP        | 0.11  | 12.54 | 1.19  | 0.23829 |
| RELA-DT    | 0.12  | 6.23  | 1.19  | 0.23836 |
| LINC00663  | -0.12 | 5.39  | -1.19 | 0.23856 |
| RPL3P3     | 0.16  | 6.25  | 1.19  | 0.23867 |
| IGLC6      | 0.21  | 5.27  | 1.19  | 0.23896 |
| NUCB2      | 0.12  | 8.75  | 1.19  | 0.23897 |
| PPWD1      | -0.11 | 8.07  | -1.19 | 0.23898 |
| POLE4      | 0.13  | 9.26  | 1.19  | 0.23921 |
| RAB3GAP2   | 0.11  | 8.62  | 1.19  | 0.23922 |
| BTG3       | -0.10 | 6.26  | -1.19 | 0.23930 |
| C2orf88    | -0.17 | 7.64  | -1.19 | 0.23934 |
| AMFR       | -0.07 | 10.12 | -1.19 | 0.23936 |
| STX18-AS1  | 0.12  | 6.12  | 1.19  | 0.23937 |
| NR1D1      | 0.14  | 8.44  | 1.19  | 0.23940 |
| AC004233.2 | -0.18 | 5.89  | -1.19 | 0.23946 |
| ZFAND2B    | 0.08  | 10.07 | 1.19  | 0.23946 |
| MSH6       | -0.08 | 8.27  | -1.19 | 0.23953 |
| POLM       | 0.10  | 8.92  | 1.19  | 0.23964 |

|            |       |       |       |         |
|------------|-------|-------|-------|---------|
| OTUD6B     | -0.15 | 5.40  | -1.19 | 0.23967 |
| HSDL2      | -0.14 | 8.93  | -1.19 | 0.23968 |
| TMA7       | 0.13  | 10.82 | 1.19  | 0.23971 |
| ABCD3      | -0.10 | 7.14  | -1.19 | 0.23972 |
| GARS-DT    | -0.18 | 8.84  | -1.19 | 0.23972 |
| FOXK2      | 0.06  | 9.60  | 1.19  | 0.23979 |
| CENPK      | 0.20  | 5.37  | 1.19  | 0.23981 |
| S100A4     | 0.16  | 13.56 | 1.19  | 0.23988 |
| CYP4F29P   | 0.47  | 6.48  | 1.19  | 0.23990 |
| ARMCX7P    | 0.10  | 5.19  | 1.19  | 0.24002 |
| CATSPERG   | -0.12 | 6.17  | -1.19 | 0.24010 |
| TTYH3      | -0.14 | 10.09 | -1.19 | 0.24012 |
| MYBL1      | -0.14 | 7.50  | -1.19 | 0.24014 |
| MLXIP      | 0.09  | 11.09 | 1.19  | 0.24030 |
| ELL2       | -0.18 | 6.85  | -1.19 | 0.24038 |
| ADPRHL2    | 0.10  | 9.43  | 1.19  | 0.24052 |
| ESCO1      | -0.09 | 7.24  | -1.19 | 0.24057 |
| SETD3      | -0.07 | 9.23  | -1.19 | 0.24066 |
| SERPINA1   | -0.17 | 14.80 | -1.19 | 0.24073 |
| SOX4       | 0.12  | 7.13  | 1.19  | 0.24097 |
| SELENOO    | 0.09  | 9.45  | 1.19  | 0.24117 |
| HERPUD1    | -0.08 | 10.18 | -1.19 | 0.24122 |
| LRRFIP1    | 0.11  | 12.10 | 1.19  | 0.24125 |
| DHX9P1     | -0.17 | 5.68  | -1.19 | 0.24125 |
| SLC6A9     | 0.25  | 5.99  | 1.19  | 0.24126 |
| AC009220.1 | 0.13  | 6.25  | 1.19  | 0.24129 |
| CDKN1A     | 0.16  | 9.27  | 1.19  | 0.24130 |
| ALDOA      | 0.14  | 8.49  | 1.19  | 0.24134 |
| SLC4A1AP   | -0.08 | 8.35  | -1.19 | 0.24140 |
| MANBAL     | 0.09  | 8.16  | 1.18  | 0.24144 |
| PKD3       | -0.09 | 9.24  | -1.18 | 0.24145 |
| RPL15P2    | 0.12  | 6.30  | 1.18  | 0.24149 |
| PTPRO      | -0.14 | 6.63  | -1.18 | 0.24154 |
| NFS1       | 0.08  | 7.50  | 1.18  | 0.24164 |
| FAM160B2   | 0.10  | 9.39  | 1.18  | 0.24165 |
| YME1L1     | -0.07 | 10.06 | -1.18 | 0.24182 |
| CEL        | 0.13  | 5.05  | 1.18  | 0.24182 |
| FPGT       | -0.13 | 6.34  | -1.18 | 0.24186 |
| APH1A      | 0.08  | 10.83 | 1.18  | 0.24194 |
| UBE2MP1    | 0.13  | 5.69  | 1.18  | 0.24194 |
| AC067945.1 | -0.13 | 5.08  | -1.18 | 0.24196 |
| SORD2P     | -0.13 | 5.49  | -1.18 | 0.24204 |
| FBXL17     | 0.10  | 7.65  | 1.18  | 0.24218 |
| MSH2       | -0.12 | 6.82  | -1.18 | 0.24229 |
| ACACA      | -0.10 | 7.66  | -1.18 | 0.24234 |
| CNPPD1     | 0.12  | 11.41 | 1.18  | 0.24252 |
| RPL7P26    | 0.12  | 5.60  | 1.18  | 0.24259 |
| FARSB      | 0.10  | 8.11  | 1.18  | 0.24267 |
| SFSWAP     | 0.07  | 9.64  | 1.18  | 0.24272 |
| WNT10A     | 0.15  | 6.36  | 1.18  | 0.24273 |



|            |       |       |       |         |
|------------|-------|-------|-------|---------|
| WDR61      | 0.09  | 8.19  | 1.18  | 0.24279 |
| MRPS33     | 0.11  | 7.32  | 1.18  | 0.24287 |
| PPM1J      | 0.13  | 5.09  | 1.18  | 0.24299 |
| ARHGEF2    | -0.07 | 11.54 | -1.18 | 0.24299 |
| HSPA6      | -0.18 | 10.95 | -1.18 | 0.24308 |
| AL161787.1 | 0.18  | 6.59  | 1.18  | 0.24325 |
| AC064807.1 | 0.11  | 5.64  | 1.18  | 0.24326 |
| NUP42      | -0.08 | 7.26  | -1.18 | 0.24340 |
| CEBPG      | -0.07 | 8.79  | -1.18 | 0.24352 |
| ZNF530     | 0.11  | 6.02  | 1.18  | 0.24359 |
| PACSIN1    | 0.16  | 6.95  | 1.18  | 0.24365 |
| BPTF       | -0.11 | 9.63  | -1.18 | 0.24373 |
| ZNF300     | -0.18 | 5.01  | -1.18 | 0.24374 |
| TAF8       | -0.09 | 8.60  | -1.18 | 0.24383 |
| SCO1       | 0.07  | 8.22  | 1.18  | 0.24388 |
| PSMB1      | 0.09  | 10.62 | 1.18  | 0.24396 |
| AC078846.1 | -0.11 | 5.58  | -1.18 | 0.24398 |
| CUL7       | 0.10  | 8.38  | 1.18  | 0.24401 |
| ATP6V1D    | -0.09 | 8.39  | -1.18 | 0.24408 |
| PTER       | -0.12 | 6.12  | -1.18 | 0.24408 |
| AL139113.1 | 0.21  | 5.25  | 1.18  | 0.24409 |
| EEF1GP1    | 0.13  | 5.48  | 1.18  | 0.24423 |
| CBLB       | -0.09 | 8.53  | -1.18 | 0.24429 |
| NUP54      | -0.11 | 7.12  | -1.18 | 0.24436 |
| SNAPIN     | 0.08  | 8.08  | 1.18  | 0.24441 |
| SNHG16     | 0.12  | 9.17  | 1.18  | 0.24443 |
| AL355032.1 | 0.12  | 6.07  | 1.18  | 0.24452 |
| DDX51      | 0.09  | 8.85  | 1.18  | 0.24460 |
| ZMAT2      | 0.09  | 10.58 | 1.18  | 0.24464 |
| ANP32E     | -0.09 | 8.18  | -1.18 | 0.24471 |
| BLNK       | 0.17  | 7.47  | 1.18  | 0.24506 |
| ANKS3      | 0.12  | 7.38  | 1.18  | 0.24513 |
| FKBP8      | 0.27  | 14.77 | 1.18  | 0.24521 |
| UPF1       | -0.09 | 11.51 | -1.18 | 0.24521 |
| HMG2       | 0.09  | 11.00 | 1.18  | 0.24523 |
| AC011472.2 | -0.28 | 8.78  | -1.18 | 0.24527 |
| IPO13      | 0.07  | 8.89  | 1.18  | 0.24529 |
| AC006511.4 | 0.11  | 5.15  | 1.18  | 0.24537 |
| SRD5A1     | -0.10 | 7.06  | -1.17 | 0.24547 |
| PTMAP9     | 0.10  | 5.77  | 1.17  | 0.24559 |
| TK1        | 0.15  | 6.33  | 1.17  | 0.24566 |
| TREML2     | -0.19 | 10.40 | -1.17 | 0.24570 |
| PNMA3      | 0.25  | 6.82  | 1.17  | 0.24571 |
| PFN1P1     | 0.20  | 8.83  | 1.17  | 0.24577 |
| FNTA       | -0.07 | 8.83  | -1.17 | 0.24577 |
| NXPH4      | 0.14  | 5.24  | 1.17  | 0.24577 |
| ZFAND4     | -0.12 | 6.57  | -1.17 | 0.24600 |
| NAA15      | -0.10 | 7.60  | -1.17 | 0.24606 |
| VAMP7      | -0.10 | 7.88  | -1.17 | 0.24615 |
| KLF9       | -0.14 | 7.34  | -1.17 | 0.24617 |

|            |       |       |       |         |
|------------|-------|-------|-------|---------|
| PCNX4      | -0.10 | 7.68  | -1.17 | 0.24620 |
| AC104339.1 | 0.19  | 4.97  | 1.17  | 0.24632 |
| MDFIC      | -0.14 | 8.04  | -1.17 | 0.24639 |
| ERMAP      | -0.15 | 7.65  | -1.17 | 0.24640 |
| RPAP1      | 0.08  | 8.69  | 1.17  | 0.24654 |
| BCAS2P2    | -0.11 | 5.22  | -1.17 | 0.24657 |
| CEP85L     | -0.11 | 7.21  | -1.17 | 0.24679 |
| TIGD1      | -0.11 | 5.80  | -1.17 | 0.24682 |
| NLGN3      | -0.16 | 6.96  | -1.17 | 0.24697 |
| SATB1      | -0.15 | 9.39  | -1.17 | 0.24708 |
| SLC35A3    | -0.10 | 6.45  | -1.17 | 0.24719 |
| KIAA1211L  | -0.13 | 6.09  | -1.17 | 0.24724 |
| SLC25A38   | 0.08  | 9.27  | 1.17  | 0.24724 |
| ANKRD6     | -0.11 | 6.18  | -1.17 | 0.24724 |
| TM9SF1     | 0.13  | 5.38  | 1.17  | 0.24734 |
| GTSF1      | 0.16  | 6.08  | 1.17  | 0.24738 |
| U62317.4   | -0.19 | 6.64  | -1.17 | 0.24747 |
| RNF126P1   | 0.12  | 5.12  | 1.17  | 0.24748 |
| ABCF2      | 0.07  | 9.76  | 1.17  | 0.24751 |
| CSPP1      | 0.16  | 8.05  | 1.17  | 0.24753 |
| MPZL1      | -0.17 | 9.64  | -1.17 | 0.24754 |
| AL138724.2 | 0.14  | 5.20  | 1.17  | 0.24757 |
| CDC14B     | -0.13 | 6.86  | -1.17 | 0.24759 |
| ENTPD3-AS1 | 0.14  | 5.79  | 1.17  | 0.24759 |
| DPM1       | -0.10 | 7.83  | -1.17 | 0.24764 |
| DDX11      | 0.30  | 8.24  | 1.17  | 0.24768 |
| LLPH       | 0.08  | 7.99  | 1.17  | 0.24771 |
| NIPAL3     | 0.09  | 8.92  | 1.17  | 0.24775 |
| CSF1       | -0.14 | 7.79  | -1.17 | 0.24775 |
| GNG5       | -0.12 | 6.60  | -1.17 | 0.24776 |
| CRIP3      | 0.20  | 6.28  | 1.17  | 0.24777 |
| GAS6       | 0.15  | 7.30  | 1.17  | 0.24788 |
| EDA        | 0.18  | 5.45  | 1.17  | 0.24797 |
| HNMT       | -0.13 | 7.22  | -1.17 | 0.24804 |
| LONP2      | 0.08  | 9.36  | 1.17  | 0.24812 |
| SLC9A7P1   | -0.14 | 5.82  | -1.17 | 0.24834 |
| AHI1       | -0.14 | 5.53  | -1.17 | 0.24850 |
| EIF4A3     | 0.07  | 9.97  | 1.17  | 0.24856 |
| DNAJC7     | 0.08  | 9.92  | 1.17  | 0.24866 |
| SACS       | -0.14 | 6.53  | -1.17 | 0.24872 |
| KCND3      | -0.14 | 5.01  | -1.17 | 0.24896 |
| CYTH2      | 0.09  | 9.65  | 1.17  | 0.24897 |
| RBM25      | 0.15  | 10.41 | 1.17  | 0.24912 |
| TSC22D1    | -0.10 | 9.07  | -1.17 | 0.24917 |
| AL662907.1 | 0.12  | 5.41  | 1.17  | 0.24919 |
| DUSP11     | -0.08 | 7.92  | -1.17 | 0.24921 |
| RNF149     | -0.17 | 11.85 | -1.17 | 0.24921 |
| SLC2A1-AS1 | -0.16 | 5.24  | -1.17 | 0.24928 |
| TNFSF14    | -0.14 | 9.56  | -1.17 | 0.24929 |
| RAMP1      | 0.14  | 5.36  | 1.16  | 0.24945 |

|            |       |       |       |         |
|------------|-------|-------|-------|---------|
| TRAV39     | -0.15 | 5.39  | -1.16 | 0.24947 |
| KAT6A      | -0.12 | 10.22 | -1.16 | 0.24952 |
| ELP1       | -0.10 | 8.25  | -1.16 | 0.24959 |
| LINC02631  | -0.16 | 5.47  | -1.16 | 0.24959 |
| TBX6       | 0.14  | 5.55  | 1.16  | 0.24965 |
| AC107068.1 | 0.12  | 5.40  | 1.16  | 0.24967 |
| MORN3      | 0.14  | 6.91  | 1.16  | 0.24970 |
| CHST12     | 0.13  | 9.56  | 1.16  | 0.24980 |
| RPS7P10    | 0.18  | 6.88  | 1.16  | 0.24986 |
| DPP9       | 0.07  | 10.01 | 1.16  | 0.24990 |
| SLC1A5     | 0.14  | 9.93  | 1.16  | 0.24991 |
| KIF20B     | 0.14  | 6.46  | 1.16  | 0.24992 |
| FAM50B     | 0.11  | 7.63  | 1.16  | 0.24997 |
| KLHL36     | 0.06  | 9.80  | 1.16  | 0.24998 |
| C22orf34   | 0.14  | 6.91  | 1.16  | 0.25008 |
| PBLD       | -0.11 | 5.48  | -1.16 | 0.25015 |
| BISPR      | -0.15 | 7.50  | -1.16 | 0.25017 |
| KIF23      | -0.11 | 5.07  | -1.16 | 0.25019 |
| WHAMM      | -0.06 | 8.30  | -1.16 | 0.25023 |
| FRG1CP     | 0.14  | 7.27  | 1.16  | 0.25035 |
| AC008074.2 | -0.15 | 5.10  | -1.16 | 0.25045 |
| IGHV4-34   | 0.32  | 8.05  | 1.16  | 0.25052 |
| LIG3       | -0.08 | 8.13  | -1.16 | 0.25053 |
| HBG1       | 0.51  | 7.03  | 1.16  | 0.25057 |
| S100B      | 0.38  | 6.79  | 1.16  | 0.25057 |
| TRNT1      | -0.12 | 6.52  | -1.16 | 0.25059 |
| COIL       | 0.10  | 7.11  | 1.16  | 0.25069 |
| TPT1P4     | 0.17  | 9.03  | 1.16  | 0.25079 |
| SEPTIN7P2  | 0.14  | 6.74  | 1.16  | 0.25080 |
| KIAA0930   | 0.12  | 11.57 | 1.16  | 0.25102 |
| SH3TC1     | 0.11  | 9.64  | 1.16  | 0.25114 |
| ZMPSTE24   | -0.10 | 7.78  | -1.16 | 0.25120 |
| MYO9A      | 0.10  | 8.03  | 1.16  | 0.25134 |
| RPS29P3    | 0.18  | 6.45  | 1.16  | 0.25148 |
| C3orf62    | -0.14 | 8.90  | -1.16 | 0.25153 |
| GLCE       | -0.12 | 6.17  | -1.16 | 0.25160 |
| FCGR1CP    | -0.24 | 5.91  | -1.16 | 0.25177 |
| SNHG3      | -0.12 | 7.59  | -1.16 | 0.25214 |
| PDCL3      | 0.11  | 7.47  | 1.16  | 0.25224 |
| AC022706.1 | 0.15  | 6.93  | 1.16  | 0.25236 |
| AC006333.1 | -0.12 | 5.32  | -1.16 | 0.25247 |
| CTSL       | -0.20 | 7.59  | -1.16 | 0.25248 |
| ENKD1      | 0.11  | 7.42  | 1.16  | 0.25252 |
| TRAV16     | 0.13  | 5.40  | 1.16  | 0.25254 |
| RPL9P7     | 0.18  | 8.93  | 1.16  | 0.25258 |
| NLGN2      | 0.13  | 6.23  | 1.16  | 0.25258 |
| EBPL       | 0.10  | 7.21  | 1.16  | 0.25271 |
| FAM193A    | -0.06 | 9.25  | -1.16 | 0.25277 |
| VSIG10L    | 0.13  | 5.08  | 1.16  | 0.25278 |
| TP53BP1    | -0.08 | 8.34  | -1.16 | 0.25279 |

|            |       |       |       |         |
|------------|-------|-------|-------|---------|
| GNB2       | 0.13  | 13.10 | 1.16  | 0.25282 |
| P3H1       | 0.08  | 9.03  | 1.16  | 0.25285 |
| FAM104B    | 0.11  | 6.81  | 1.16  | 0.25287 |
| SPIRE1     | -0.11 | 5.39  | -1.16 | 0.25289 |
| HHAT       | -0.09 | 5.61  | -1.16 | 0.25303 |
| SMAD5      | -0.11 | 6.82  | -1.16 | 0.25309 |
| PTPRN      | 0.15  | 5.53  | 1.16  | 0.25312 |
| CDKN2A     | 0.13  | 5.48  | 1.16  | 0.25323 |
| HOXA1      | -0.11 | 5.31  | -1.16 | 0.25325 |
| VWF        | 0.22  | 7.41  | 1.16  | 0.25333 |
| VASH1-AS1  | 0.11  | 6.89  | 1.16  | 0.25334 |
| POU6F1     | 0.14  | 8.04  | 1.16  | 0.25339 |
| MS4A3      | -0.21 | 6.33  | -1.15 | 0.25342 |
| SUV39H1    | 0.10  | 7.95  | 1.15  | 0.25350 |
| MECP2      | 0.06  | 10.78 | 1.15  | 0.25355 |
| PSME3      | -0.07 | 10.23 | -1.15 | 0.25359 |
| P3H2       | -0.17 | 4.91  | -1.15 | 0.25377 |
| NPIP3      | -0.18 | 7.77  | -1.15 | 0.25391 |
| TRIM58     | 0.29  | 11.17 | 1.15  | 0.25397 |
| CD151      | 0.20  | 10.02 | 1.15  | 0.25403 |
| DISP1      | -0.12 | 6.03  | -1.15 | 0.25430 |
| CLUH       | 0.09  | 9.37  | 1.15  | 0.25439 |
| TBCA       | 0.10  | 8.55  | 1.15  | 0.25448 |
| VPS13D     | -0.07 | 9.38  | -1.15 | 0.25449 |
| MT-TV      | 0.20  | 6.43  | 1.15  | 0.25454 |
| AC026877.1 | -0.19 | 6.95  | -1.15 | 0.25456 |
| UBE2V2     | 0.09  | 7.80  | 1.15  | 0.25458 |
| FAM53A     | 0.14  | 4.98  | 1.15  | 0.25461 |
| FLT3LG     | 0.15  | 5.35  | 1.15  | 0.25462 |
| XRN2       | -0.07 | 10.58 | -1.15 | 0.25463 |
| PKD1       | 0.10  | 9.49  | 1.15  | 0.25464 |
| EPRS1      | 0.08  | 9.90  | 1.15  | 0.25484 |
| STIP1      | 0.08  | 10.48 | 1.15  | 0.25491 |
| EMC3-AS1   | 0.14  | 5.93  | 1.15  | 0.25519 |
| MTG2       | 0.08  | 9.27  | 1.15  | 0.25525 |
| KNDC1      | -0.21 | 5.66  | -1.15 | 0.25530 |
| RBMS2      | -0.13 | 6.91  | -1.15 | 0.25535 |
| IL1B       | -0.19 | 9.40  | -1.15 | 0.25539 |
| SCRIB      | 0.09  | 8.83  | 1.15  | 0.25540 |
| AC022966.1 | 0.08  | 9.65  | 1.15  | 0.25548 |
| UQCRQ      | 0.11  | 9.15  | 1.15  | 0.25569 |
| DOCK9-DT   | 0.13  | 5.29  | 1.15  | 0.25570 |
| ETS1       | -0.12 | 11.97 | -1.15 | 0.25573 |
| ZNF710     | -0.10 | 9.87  | -1.15 | 0.25573 |
| C9orf139   | -0.16 | 8.62  | -1.15 | 0.25574 |
| PPP4R2     | -0.13 | 8.13  | -1.15 | 0.25615 |
| RNF207     | -0.17 | 5.37  | -1.15 | 0.25615 |
| PKN3       | -0.14 | 6.33  | -1.15 | 0.25616 |
| DZANK1     | -0.11 | 5.43  | -1.15 | 0.25619 |
| CALR       | 0.10  | 12.82 | 1.15  | 0.25625 |

|            |       |       |       |         |
|------------|-------|-------|-------|---------|
| FOS        | -0.20 | 10.18 | -1.15 | 0.25630 |
| ST13       | 0.09  | 10.53 | 1.15  | 0.25645 |
| CYB5R1     | 0.08  | 9.58  | 1.15  | 0.25652 |
| LINC00921  | -0.11 | 7.30  | -1.15 | 0.25662 |
| AC112496.1 | 0.22  | 5.54  | 1.15  | 0.25670 |
| SPG7       | 0.09  | 10.70 | 1.15  | 0.25672 |
| RPL24P4    | 0.16  | 7.50  | 1.15  | 0.25675 |
| C17orf97   | -0.29 | 5.28  | -1.15 | 0.25679 |
| SF1        | 0.05  | 12.26 | 1.15  | 0.25683 |
| AC015871.3 | -0.17 | 7.07  | -1.15 | 0.25683 |
| THNSL2     | -0.23 | 5.76  | -1.15 | 0.25699 |
| RECQL4     | 0.12  | 6.03  | 1.15  | 0.25703 |
| SMPD4      | 0.08  | 9.45  | 1.15  | 0.25713 |
| NPIPA7     | -0.11 | 6.30  | -1.15 | 0.25722 |
| ABR        | -0.07 | 11.40 | -1.15 | 0.25734 |
| LRRC23     | 0.10  | 6.57  | 1.15  | 0.25738 |
| BRD2       | -0.05 | 12.15 | -1.15 | 0.25746 |
| IL6ST      | -0.15 | 8.24  | -1.14 | 0.25760 |
| DEPDC5     | 0.07  | 8.54  | 1.14  | 0.25767 |
| AC144652.1 | 0.10  | 5.88  | 1.14  | 0.25770 |
| ETS2       | -0.15 | 9.59  | -1.14 | 0.25790 |
| ADRA2A     | -0.13 | 5.07  | -1.14 | 0.25799 |
| LARP4      | -0.10 | 6.67  | -1.14 | 0.25801 |
| AC026410.1 | 0.10  | 5.43  | 1.14  | 0.25808 |
| AC092017.2 | 0.11  | 5.70  | 1.14  | 0.25817 |
| MRPL44     | -0.07 | 8.38  | -1.14 | 0.25824 |
| B4GALT4    | -0.09 | 7.36  | -1.14 | 0.25824 |
| HS6ST1     | 0.08  | 8.27  | 1.14  | 0.25825 |
| LAMTOR4    | 0.14  | 11.69 | 1.14  | 0.25828 |
| JTB        | 0.15  | 7.41  | 1.14  | 0.25843 |
| AC097637.2 | 0.15  | 5.14  | 1.14  | 0.25846 |
| BCL2L1     | 0.26  | 12.38 | 1.14  | 0.25847 |
| BTN2A2     | -0.09 | 8.46  | -1.14 | 0.25862 |
| MTIF2      | 0.09  | 7.68  | 1.14  | 0.25872 |
| ZMYM6      | -0.09 | 6.99  | -1.14 | 0.25881 |
| NME7       | 0.11  | 5.92  | 1.14  | 0.25900 |
| ZBED3      | 0.14  | 6.33  | 1.14  | 0.25910 |
| PSME4      | -0.10 | 9.36  | -1.14 | 0.25914 |
| TCTN1      | -0.10 | 6.68  | -1.14 | 0.25918 |
| MCU        | -0.08 | 7.49  | -1.14 | 0.25921 |
| PSAT1      | -0.17 | 5.84  | -1.14 | 0.25936 |
| SSRP1      | 0.08  | 10.72 | 1.14  | 0.25958 |
| AC091729.3 | 0.16  | 5.56  | 1.14  | 0.25959 |
| TFDP1      | -0.13 | 9.09  | -1.14 | 0.25961 |
| MAGEE1     | -0.12 | 6.16  | -1.14 | 0.25964 |
| RSF1       | 0.12  | 9.08  | 1.14  | 0.25971 |
| FAM133DP   | 0.14  | 5.69  | 1.14  | 0.25975 |
| BX322650.1 | -0.14 | 5.05  | -1.14 | 0.25984 |
| PLCL2      | -0.09 | 9.69  | -1.14 | 0.25990 |
| TMEM216    | 0.11  | 7.82  | 1.14  | 0.26003 |

|             |       |       |       |         |
|-------------|-------|-------|-------|---------|
| AC002091.2  | -0.15 | 5.06  | -1.14 | 0.26005 |
| PREB        | 0.07  | 9.94  | 1.14  | 0.26016 |
| EPHX2       | 0.19  | 8.21  | 1.14  | 0.26020 |
| FNBP1L      | -0.12 | 5.11  | -1.14 | 0.26032 |
| FRMD3       | -0.14 | 6.01  | -1.14 | 0.26034 |
| XPO7        | -0.17 | 9.52  | -1.14 | 0.26054 |
| RAD51C      | -0.12 | 6.79  | -1.14 | 0.26057 |
| GVINP1      | -0.12 | 8.40  | -1.14 | 0.26064 |
| LPP         | 0.13  | 8.98  | 1.14  | 0.26067 |
| LIMK2       | -0.20 | 11.29 | -1.14 | 0.26068 |
| PTBP1       | 0.06  | 11.55 | 1.14  | 0.26075 |
| AC107890.1  | 0.12  | 5.13  | 1.14  | 0.26083 |
| DNMT3A      | -0.09 | 9.08  | -1.14 | 0.26090 |
| ZAP70       | 0.11  | 11.91 | 1.14  | 0.26100 |
| AC107075.1  | 0.15  | 6.36  | 1.13  | 0.26164 |
| GINS3       | -0.10 | 5.86  | -1.13 | 0.26164 |
| ENTPD6      | 0.10  | 9.81  | 1.13  | 0.26164 |
| AP001160.1  | 0.17  | 5.05  | 1.13  | 0.26168 |
| SIGLEC12    | -0.25 | 5.25  | -1.13 | 0.26193 |
| JUP         | -0.31 | 9.42  | -1.13 | 0.26193 |
| ELOVL1      | 0.07  | 10.55 | 1.13  | 0.26196 |
| FBXO25      | 0.11  | 8.02  | 1.13  | 0.26197 |
| GM2A        | -0.13 | 9.49  | -1.13 | 0.26197 |
| SFMBT1      | 0.10  | 7.36  | 1.13  | 0.26199 |
| EMP1        | -0.16 | 5.34  | -1.13 | 0.26215 |
| CHMP4B      | 0.09  | 11.25 | 1.13  | 0.26219 |
| CADM4       | -0.16 | 6.40  | -1.13 | 0.26223 |
| RELA        | 0.06  | 10.92 | 1.13  | 0.26232 |
| ZNF527      | -0.10 | 5.79  | -1.13 | 0.26233 |
| AL139020.1  | 0.21  | 6.22  | 1.13  | 0.26236 |
| ARF5        | 0.09  | 10.89 | 1.13  | 0.26238 |
| ADTRP       | 0.20  | 6.18  | 1.13  | 0.26242 |
| TTC12       | 0.12  | 6.81  | 1.13  | 0.26266 |
| GIMAP6      | -0.10 | 10.91 | -1.13 | 0.26281 |
| ERAL1       | 0.09  | 8.69  | 1.13  | 0.26291 |
| WDR19       | -0.12 | 6.56  | -1.13 | 0.26300 |
| SH3YL1      | -0.15 | 7.79  | -1.13 | 0.26301 |
| NCBP1       | -0.08 | 7.95  | -1.13 | 0.26307 |
| NIP7        | -0.09 | 7.95  | -1.13 | 0.26309 |
| DHX58       | -0.21 | 9.08  | -1.13 | 0.26315 |
| CCDC59      | 0.09  | 7.55  | 1.13  | 0.26317 |
| DHRS7       | -0.10 | 10.07 | -1.13 | 0.26320 |
| EGFL7       | 0.13  | 5.77  | 1.13  | 0.26330 |
| ANKRD44-IT1 | 0.24  | 6.68  | 1.13  | 0.26347 |
| C1RL        | -0.15 | 9.96  | -1.13 | 0.26348 |
| POLR3K      | 0.10  | 7.51  | 1.13  | 0.26355 |
| GIMAP5      | -0.16 | 6.76  | -1.13 | 0.26363 |
| POGLUT1     | -0.09 | 7.23  | -1.13 | 0.26393 |
| RHEBL1      | 0.10  | 5.83  | 1.13  | 0.26398 |
| FAM122A     | -0.09 | 7.10  | -1.13 | 0.26413 |

|            |       |       |       |         |
|------------|-------|-------|-------|---------|
| DHX33      | -0.09 | 7.12  | -1.13 | 0.26414 |
| PRR3       | 0.09  | 7.64  | 1.13  | 0.26417 |
| KREMEN1    | -0.30 | 8.94  | -1.13 | 0.26426 |
| TP53I3     | -0.14 | 6.78  | -1.13 | 0.26429 |
| IL17RE     | -0.18 | 5.55  | -1.13 | 0.26430 |
| CLEC16A    | 0.06  | 9.15  | 1.13  | 0.26442 |
| GCM1       | -0.14 | 4.98  | -1.13 | 0.26448 |
| GSR        | -0.07 | 9.10  | -1.13 | 0.26448 |
| GNMT       | 0.16  | 6.01  | 1.13  | 0.26455 |
| STK16      | 0.09  | 9.18  | 1.13  | 0.26470 |
| SFPQ       | -0.06 | 10.61 | -1.13 | 0.26476 |
| TIPIN      | -0.10 | 5.32  | -1.13 | 0.26478 |
| CCDC32     | 0.07  | 8.54  | 1.13  | 0.26479 |
| AC011462.5 | 0.12  | 6.12  | 1.13  | 0.26493 |
| EXOSC2     | 0.08  | 7.99  | 1.13  | 0.26495 |
| HEXD       | 0.13  | 9.18  | 1.13  | 0.26499 |
| ZNF618     | -0.16 | 6.06  | -1.13 | 0.26515 |
| RIPOR3     | 0.21  | 6.17  | 1.13  | 0.26517 |
| CCNB2      | -0.12 | 5.17  | -1.13 | 0.26522 |
| AVIL       | -0.20 | 7.69  | -1.13 | 0.26526 |
| SRD5A3     | 0.12  | 6.65  | 1.13  | 0.26536 |
| CDK5RAP2   | 0.06  | 9.61  | 1.13  | 0.26551 |
| MAGT1      | -0.08 | 8.46  | -1.13 | 0.26553 |
| RAD54L     | -0.13 | 4.94  | -1.13 | 0.26557 |
| ACAT2      | 0.07  | 7.72  | 1.13  | 0.26562 |
| AC006254.1 | -0.15 | 6.01  | -1.13 | 0.26569 |
| UNC5CL     | -0.14 | 5.99  | -1.13 | 0.26571 |
| AGAP3      | 0.11  | 9.42  | 1.13  | 0.26572 |
| HS1BP3     | 0.10  | 9.52  | 1.13  | 0.26575 |
| MAP4K4     | -0.10 | 11.02 | -1.12 | 0.26580 |
| CYP2S1     | 0.19  | 7.52  | 1.12  | 0.26587 |
| TATDN2     | 0.09  | 9.28  | 1.12  | 0.26616 |
| ZHX3       | 0.09  | 7.06  | 1.12  | 0.26618 |
| ZNF484     | -0.11 | 5.72  | -1.12 | 0.26619 |
| GP1BA      | 0.19  | 7.83  | 1.12  | 0.26620 |
| FCRLA      | 0.21  | 8.58  | 1.12  | 0.26637 |
| IGKC       | 0.27  | 13.52 | 1.12  | 0.26638 |
| PI4KAP1    | -0.24 | 7.46  | -1.12 | 0.26656 |
| IDH2       | 0.11  | 10.15 | 1.12  | 0.26657 |
| MED29      | 0.06  | 9.76  | 1.12  | 0.26679 |
| RPL21P116  | 0.14  | 5.76  | 1.12  | 0.26702 |
| ACTN4      | 0.11  | 12.87 | 1.12  | 0.26703 |
| SLC38A7    | 0.11  | 8.07  | 1.12  | 0.26706 |
| RMDN1      | 0.07  | 7.56  | 1.12  | 0.26707 |
| EIF4B      | 0.07  | 12.06 | 1.12  | 0.26711 |
| RPL3P9     | 0.11  | 5.42  | 1.12  | 0.26712 |
| HDAC8      | 0.08  | 6.40  | 1.12  | 0.26730 |
| AC138035.1 | -0.23 | 7.20  | -1.12 | 0.26748 |
| MSTO1      | 0.11  | 7.17  | 1.12  | 0.26752 |
| MIER3      | -0.13 | 5.92  | -1.12 | 0.26753 |

|            |       |       |       |         |
|------------|-------|-------|-------|---------|
| RPSAP54    | 0.11  | 6.48  | 1.12  | 0.26759 |
| AC009120.2 | -0.15 | 6.77  | -1.12 | 0.26759 |
| DIDO1      | -0.09 | 10.06 | -1.12 | 0.26759 |
| PCOLCE     | 0.13  | 6.57  | 1.12  | 0.26770 |
| CD34       | 0.17  | 5.30  | 1.12  | 0.26787 |
| ITGAM      | -0.15 | 12.34 | -1.12 | 0.26797 |
| RASA4CP    | 0.11  | 6.60  | 1.12  | 0.26799 |
| PEF1       | 0.10  | 10.30 | 1.12  | 0.26801 |
| RAPH1      | -0.11 | 5.20  | -1.12 | 0.26801 |
| VDAC1      | -0.08 | 9.41  | -1.12 | 0.26806 |
| POFUT1     | -0.09 | 8.31  | -1.12 | 0.26810 |
| SRP9       | -0.10 | 8.37  | -1.12 | 0.26812 |
| REPS2      | -0.20 | 8.91  | -1.12 | 0.26815 |
| FGFRL1     | -0.14 | 7.23  | -1.12 | 0.26817 |
| RNF2       | -0.11 | 7.03  | -1.12 | 0.26825 |
| TM9SF4     | -0.07 | 10.49 | -1.12 | 0.26825 |
| TOR4A      | -0.10 | 9.19  | -1.12 | 0.26834 |
| LFNG       | 0.11  | 12.15 | 1.12  | 0.26843 |
| CD300A     | -0.12 | 11.58 | -1.12 | 0.26844 |
| MPHOSPH9   | -0.14 | 6.71  | -1.12 | 0.26851 |
| GNAI2      | 0.10  | 14.17 | 1.12  | 0.26855 |
| MGAT4A     | -0.10 | 9.27  | -1.12 | 0.26865 |
| HIF1AN     | -0.06 | 9.89  | -1.12 | 0.26880 |
| CENPO      | 0.10  | 6.90  | 1.12  | 0.26881 |
| ICE2       | -0.10 | 7.66  | -1.12 | 0.26893 |
| SMAP2      | -0.16 | 13.40 | -1.12 | 0.26893 |
| F2R        | -0.17 | 7.79  | -1.12 | 0.26909 |
| ANAPC4     | -0.08 | 7.70  | -1.12 | 0.26914 |
| HSPE1P18   | 0.23  | 6.49  | 1.12  | 0.26915 |
| SRSF6      | -0.07 | 9.50  | -1.12 | 0.26916 |
| IGHV3-7    | 0.29  | 7.82  | 1.12  | 0.26938 |
| TAX1BP1    | -0.08 | 9.97  | -1.12 | 0.26944 |
| CD70       | 0.15  | 5.58  | 1.12  | 0.26949 |
| CACNA1D    | -0.13 | 5.02  | -1.12 | 0.26956 |
| METTL17    | -0.11 | 8.59  | -1.12 | 0.26962 |
| SLC50A1    | 0.10  | 8.70  | 1.12  | 0.26970 |
| SND1       | 0.09  | 11.46 | 1.12  | 0.26973 |
| TNNI2      | 0.14  | 7.69  | 1.12  | 0.26974 |
| GNPDA1     | 0.09  | 8.31  | 1.12  | 0.26975 |
| TRAPPC4    | 0.10  | 8.88  | 1.12  | 0.26977 |
| AC015813.6 | -0.11 | 6.16  | -1.12 | 0.26997 |
| FRA10AC1   | 0.10  | 7.15  | 1.11  | 0.27007 |
| KDM5B      | -0.11 | 8.61  | -1.11 | 0.27030 |
| TPRG1L     | 0.08  | 10.79 | 1.11  | 0.27033 |
| GAPDHP63   | 0.12  | 5.78  | 1.11  | 0.27037 |
| IDUA       | 0.12  | 8.02  | 1.11  | 0.27042 |
| CD22       | 0.20  | 10.19 | 1.11  | 0.27056 |
| FAM107B    | -0.07 | 10.68 | -1.11 | 0.27056 |
| NAPG       | -0.08 | 7.49  | -1.11 | 0.27064 |
| QDPR       | 0.10  | 7.96  | 1.11  | 0.27068 |



|            |       |       |       |         |
|------------|-------|-------|-------|---------|
| FLT4       | 0.19  | 6.67  | 1.11  | 0.27077 |
| ZNF286A    | 0.11  | 6.05  | 1.11  | 0.27087 |
| PAQR8      | 0.11  | 8.54  | 1.11  | 0.27097 |
| ZNF558     | -0.12 | 6.54  | -1.11 | 0.27109 |
| C1orf216   | 0.09  | 7.66  | 1.11  | 0.27113 |
| MRTFA      | 0.07  | 11.37 | 1.11  | 0.27132 |
| LINC01238  | -0.15 | 5.91  | -1.11 | 0.27138 |
| MTHFS      | 0.13  | 5.54  | 1.11  | 0.27138 |
| EPPK1      | 0.18  | 6.00  | 1.11  | 0.27153 |
| PECAM1     | -0.10 | 13.01 | -1.11 | 0.27155 |
| CROCC      | 0.12  | 8.29  | 1.11  | 0.27157 |
| C19orf44   | 0.12  | 6.00  | 1.11  | 0.27158 |
| SNRPF      | 0.11  | 8.40  | 1.11  | 0.27160 |
| YLPM1      | -0.07 | 9.59  | -1.11 | 0.27163 |
| ARRDC1-AS1 | 0.11  | 7.24  | 1.11  | 0.27167 |
| C20orf27   | 0.13  | 10.04 | 1.11  | 0.27171 |
| RDH5       | -0.15 | 5.36  | -1.11 | 0.27181 |
| AC023161.2 | -0.11 | 5.30  | -1.11 | 0.27183 |
| ZC4H2      | 0.10  | 6.42  | 1.11  | 0.27187 |
| SYT17      | 0.15  | 6.04  | 1.11  | 0.27197 |
| IGLV3-1    | 0.24  | 8.14  | 1.11  | 0.27203 |
| AL365357.1 | 0.31  | 7.99  | 1.11  | 0.27207 |
| PM20D2     | -0.11 | 6.19  | -1.11 | 0.27218 |
| ATP5MD     | 0.12  | 7.82  | 1.11  | 0.27221 |
| ZNF318     | -0.10 | 8.40  | -1.11 | 0.27228 |
| FAM118A    | 0.26  | 8.52  | 1.11  | 0.27232 |
| USP47      | -0.08 | 8.96  | -1.11 | 0.27235 |
| LINC01765  | -0.17 | 5.72  | -1.11 | 0.27237 |
| IMPAD1     | -0.09 | 8.06  | -1.11 | 0.27239 |
| ZNF790-AS1 | 0.12  | 5.37  | 1.11  | 0.27246 |
| ACTN4P1    | 0.12  | 6.62  | 1.11  | 0.27247 |
| LINC002481 | 0.12  | 7.34  | 1.11  | 0.27252 |
| PRR34      | 0.09  | 5.41  | 1.11  | 0.27254 |
| POU2AF1    | 0.16  | 8.55  | 1.11  | 0.27264 |
| AC015726.1 | -0.13 | 5.54  | -1.11 | 0.27267 |
| TRIM59     | -0.09 | 6.47  | -1.11 | 0.27270 |
| AF201337.1 | -0.12 | 5.45  | -1.11 | 0.27279 |
| ZNF785     | 0.10  | 7.24  | 1.11  | 0.27280 |
| ZNF738     | -0.13 | 5.51  | -1.11 | 0.27284 |
| PLCL1      | -0.14 | 5.72  | -1.11 | 0.27286 |
| GTPBP1     | -0.10 | 10.46 | -1.11 | 0.27289 |
| RAD50      | 0.13  | 5.23  | 1.11  | 0.27292 |
| CCDC138    | 0.10  | 5.26  | 1.11  | 0.27295 |
| MAD2L1BP   | -0.09 | 8.67  | -1.11 | 0.27319 |
| DDAH2      | 0.11  | 9.24  | 1.11  | 0.27321 |
| ABCC4      | -0.16 | 6.70  | -1.11 | 0.27328 |
| CCN3       | -0.19 | 6.58  | -1.11 | 0.27347 |
| TSPOAP1    | -0.17 | 8.59  | -1.11 | 0.27357 |
| IGLV9-49   | 0.18  | 5.45  | 1.11  | 0.27371 |
| MIGA1      | 0.10  | 6.80  | 1.11  | 0.27382 |

|            |       |       |       |         |
|------------|-------|-------|-------|---------|
| TESC       | 0.25  | 11.30 | 1.11  | 0.27399 |
| DNAJC18    | 0.10  | 6.03  | 1.11  | 0.27401 |
| AC010186.3 | -0.11 | 7.01  | -1.11 | 0.27404 |
| ZNF639     | -0.10 | 7.02  | -1.11 | 0.27405 |
| CDC26      | 0.09  | 7.11  | 1.11  | 0.27409 |
| LNK2       | -0.13 | 5.96  | -1.11 | 0.27410 |
| SRP9P1     | -0.13 | 5.09  | -1.11 | 0.27410 |
| SMIM12     | 0.09  | 9.05  | 1.11  | 0.27414 |
| NAA30      | -0.11 | 7.00  | -1.11 | 0.27415 |
| GMEB1      | 0.09  | 8.45  | 1.11  | 0.27419 |
| DCUN1D3    | -0.09 | 6.82  | -1.11 | 0.27423 |
| IQCC       | 0.12  | 5.55  | 1.11  | 0.27427 |
| AATBC      | -0.17 | 8.47  | -1.10 | 0.27446 |
| VDR        | -0.12 | 8.69  | -1.10 | 0.27455 |
| TTC39B     | 0.12  | 7.43  | 1.10  | 0.27455 |
| DDX31      | 0.08  | 7.54  | 1.10  | 0.27455 |
| ABCC6      | -0.14 | 6.27  | -1.10 | 0.27456 |
| PCED1B-AS1 | 0.12  | 10.51 | 1.10  | 0.27461 |
| PITPNA     | -0.09 | 10.99 | -1.10 | 0.27467 |
| PKD1P5     | 0.22  | 5.26  | 1.10  | 0.27475 |
| DOLK       | 0.09  | 7.35  | 1.10  | 0.27494 |
| FOXN2      | -0.12 | 7.29  | -1.10 | 0.27494 |
| MLLT6      | 0.07  | 12.31 | 1.10  | 0.27499 |
| ZNF718     | -0.12 | 5.87  | -1.10 | 0.27514 |
| NUP160     | -0.12 | 8.03  | -1.10 | 0.27515 |
| MT-TP      | 0.14  | 6.00  | 1.10  | 0.27543 |
| SCD5       | 0.13  | 5.51  | 1.10  | 0.27559 |
| SNHG15     | 0.09  | 7.85  | 1.10  | 0.27571 |
| NUDT4      | -0.13 | 7.57  | -1.10 | 0.27579 |
| APOL4      | -0.22 | 5.08  | -1.10 | 0.27585 |
| ZNF566     | 0.11  | 6.48  | 1.10  | 0.27610 |
| VILL       | 0.08  | 8.84  | 1.10  | 0.27611 |
| AL359532.1 | -0.15 | 5.22  | -1.10 | 0.27612 |
| ATP6AP1    | 0.08  | 11.52 | 1.10  | 0.27613 |
| LINC00299  | 0.14  | 6.57  | 1.10  | 0.27620 |
| H3P36      | -0.14 | 7.02  | -1.10 | 0.27624 |
| RPL35P1    | 0.13  | 6.26  | 1.10  | 0.27646 |
| APOM       | 0.12  | 5.59  | 1.10  | 0.27666 |
| PPT2       | 0.11  | 6.31  | 1.10  | 0.27681 |
| SLC49A4    | -0.15 | 7.01  | -1.10 | 0.27681 |
| GOSR1      | -0.06 | 8.53  | -1.10 | 0.27681 |
| MRPL3      | 0.09  | 7.93  | 1.10  | 0.27687 |
| MOB3A      | 0.11  | 13.13 | 1.10  | 0.27696 |
| ALG1       | 0.10  | 8.32  | 1.10  | 0.27697 |
| RPS3AP26   | 0.19  | 8.48  | 1.10  | 0.27705 |
| KIF21A     | -0.15 | 6.78  | -1.10 | 0.27707 |
| BRD8       | -0.09 | 9.50  | -1.10 | 0.27707 |
| SLC39A9    | -0.07 | 8.81  | -1.10 | 0.27719 |
| ST13P19    | 0.11  | 5.03  | 1.10  | 0.27729 |
| GDE1       | 0.15  | 10.53 | 1.10  | 0.27730 |

|            |       |       |       |         |
|------------|-------|-------|-------|---------|
| DUT        | 0.08  | 8.71  | 1.10  | 0.27730 |
| EIF2S3B    | -0.17 | 6.18  | -1.10 | 0.27731 |
| HCP5       | -0.07 | 11.12 | -1.10 | 0.27733 |
| NRIR       | -0.24 | 5.39  | -1.10 | 0.27750 |
| DCAKD      | 0.08  | 8.21  | 1.10  | 0.27751 |
| RHBDL1     | 0.13  | 5.04  | 1.10  | 0.27761 |
| LAMP5      | -0.16 | 6.01  | -1.10 | 0.27786 |
| PSMB7      | 0.10  | 9.93  | 1.10  | 0.27791 |
| ACOT2      | -0.11 | 6.15  | -1.10 | 0.27794 |
| CSF2RA     | -0.14 | 10.47 | -1.10 | 0.27796 |
| EMC7       | -0.08 | 8.75  | -1.10 | 0.27796 |
| PDIA6      | -0.08 | 10.31 | -1.10 | 0.27803 |
| QPCT       | -0.20 | 10.28 | -1.10 | 0.27807 |
| LMAN1      | -0.13 | 7.34  | -1.10 | 0.27811 |
| NDUFA4     | 0.10  | 9.56  | 1.10  | 0.27812 |
| SHFL       | -0.12 | 10.40 | -1.10 | 0.27812 |
| FPR3       | -0.18 | 5.60  | -1.10 | 0.27817 |
| IFI6       | -0.32 | 9.90  | -1.10 | 0.27832 |
| AC009362.1 | 0.11  | 5.24  | 1.10  | 0.27832 |
| PSPC1      | -0.06 | 8.64  | -1.10 | 0.27839 |
| BMP1       | 0.12  | 6.79  | 1.10  | 0.27849 |
| SNX22      | 0.19  | 7.95  | 1.09  | 0.27866 |
| ZSWIM3     | 0.08  | 7.44  | 1.09  | 0.27890 |
| USP18      | -0.25 | 5.53  | -1.09 | 0.27913 |
| RRN3       | -0.09 | 8.02  | -1.09 | 0.27920 |
| ILF2       | 0.08  | 9.95  | 1.09  | 0.27921 |
| CMC1       | 0.12  | 7.00  | 1.09  | 0.27922 |
| STRAP      | -0.05 | 9.12  | -1.09 | 0.27926 |
| MOB3C      | -0.09 | 9.28  | -1.09 | 0.27928 |
| H3P47      | -0.14 | 7.33  | -1.09 | 0.27932 |
| TRIP10     | 0.12  | 6.56  | 1.09  | 0.27943 |
| RANBP3     | 0.06  | 10.24 | 1.09  | 0.27946 |
| IPO11      | -0.11 | 6.34  | -1.09 | 0.27955 |
| ZNF81      | -0.12 | 5.63  | -1.09 | 0.27956 |
| PFKFB3     | -0.23 | 9.88  | -1.09 | 0.27962 |
| AC017104.1 | 0.13  | 5.54  | 1.09  | 0.27964 |
| ST13P5     | 0.10  | 5.06  | 1.09  | 0.27964 |
| EVC        | -0.15 | 4.96  | -1.09 | 0.27966 |
| HOMER2     | 0.15  | 6.40  | 1.09  | 0.27967 |
| SNX11      | -0.10 | 10.03 | -1.09 | 0.27972 |
| PMS2P4     | -0.12 | 5.08  | -1.09 | 0.27978 |
| TRAPPC13   | -0.10 | 6.57  | -1.09 | 0.27985 |
| KHK        | 0.12  | 6.83  | 1.09  | 0.27991 |
| PNPT1      | -0.14 | 7.26  | -1.09 | 0.27992 |
| GTF2I      | -0.12 | 8.19  | -1.09 | 0.27992 |
| TMEM140    | -0.15 | 11.04 | -1.09 | 0.27996 |
| ANKRD55    | 0.19  | 6.69  | 1.09  | 0.28007 |
| TRAF1      | 0.11  | 9.83  | 1.09  | 0.28008 |
| AC092324.2 | 0.16  | 6.83  | 1.09  | 0.28010 |
| BLOC1S2    | -0.09 | 8.59  | -1.09 | 0.28011 |

|            |       |       |       |         |
|------------|-------|-------|-------|---------|
| C3AR1      | -0.16 | 9.18  | -1.09 | 0.28013 |
| ASB7       | -0.09 | 7.61  | -1.09 | 0.28014 |
| CRELD1     | -0.15 | 5.69  | -1.09 | 0.28015 |
| ISM1       | 0.18  | 5.47  | 1.09  | 0.28016 |
| C11orf95   | -0.09 | 6.13  | -1.09 | 0.28016 |
| SLC45A4    | -0.17 | 10.51 | -1.09 | 0.28019 |
| IDI1       | -0.14 | 9.18  | -1.09 | 0.28020 |
| COMMD9     | 0.10  | 9.48  | 1.09  | 0.28029 |
| DHRS7B     | 0.09  | 7.95  | 1.09  | 0.28033 |
| PLCXD1     | 0.12  | 8.11  | 1.09  | 0.28038 |
| LANCL3     | -0.13 | 5.01  | -1.09 | 0.28044 |
| AIM2       | -0.15 | 7.34  | -1.09 | 0.28049 |
| PMS2P1     | 0.08  | 7.10  | 1.09  | 0.28060 |
| TIMM8B     | 0.12  | 7.82  | 1.09  | 0.28067 |
| EEF1AKNMT  | 0.07  | 9.25  | 1.09  | 0.28070 |
| RAD9A      | 0.09  | 8.83  | 1.09  | 0.28073 |
| USP37      | -0.10 | 6.60  | -1.09 | 0.28076 |
| ST6GALNAC3 | -0.17 | 5.34  | -1.09 | 0.28076 |
| IL18R1     | -0.28 | 7.38  | -1.09 | 0.28098 |
| LINC01232  | -0.10 | 6.32  | -1.09 | 0.28102 |
| RTL6       | -0.11 | 8.05  | -1.09 | 0.28116 |
| ANKRD10    | -0.07 | 9.34  | -1.09 | 0.28125 |
| SLC24A3    | 0.18  | 6.27  | 1.09  | 0.28125 |
| MYO7B      | 0.20  | 7.91  | 1.09  | 0.28130 |
| LRPAP1     | 0.09  | 11.22 | 1.09  | 0.28133 |
| UBR7       | -0.07 | 7.83  | -1.09 | 0.28133 |
| PPA2       | 0.08  | 8.12  | 1.09  | 0.28145 |
| LRSAM1     | 0.07  | 8.97  | 1.09  | 0.28163 |
| ALYREF     | 0.10  | 9.15  | 1.09  | 0.28165 |
| AC103563.7 | 0.12  | 5.50  | 1.09  | 0.28172 |
| PPAN       | 0.09  | 7.01  | 1.09  | 0.28174 |
| NCALD      | -0.13 | 7.93  | -1.09 | 0.28174 |
| ERLIN1     | -0.17 | 8.23  | -1.09 | 0.28176 |
| MMP25-AS1  | 0.16  | 8.81  | 1.09  | 0.28177 |
| SPR        | 0.13  | 5.44  | 1.09  | 0.28179 |
| HPS6       | 0.09  | 9.53  | 1.09  | 0.28205 |
| FKBP11     | 0.09  | 8.41  | 1.09  | 0.28213 |
| AKAP8L     | 0.07  | 10.28 | 1.09  | 0.28220 |
| TESMIN     | -0.10 | 6.31  | -1.09 | 0.28221 |
| SMIM8      | 0.09  | 6.31  | 1.09  | 0.28225 |
| SMIM25     | -0.18 | 11.13 | -1.09 | 0.28226 |
| RBSN       | -0.07 | 8.03  | -1.09 | 0.28237 |
| FBXL16     | 0.14  | 7.65  | 1.09  | 0.28256 |
| AL732372.2 | -0.20 | 6.83  | -1.09 | 0.28258 |
| CCNB1IP1   | 0.09  | 7.72  | 1.09  | 0.28262 |
| LINC00526  | -0.11 | 5.46  | -1.09 | 0.28290 |
| USP44      | 0.14  | 5.07  | 1.09  | 0.28290 |
| DHX40      | -0.08 | 7.76  | -1.09 | 0.28295 |
| ETF1       | -0.05 | 9.56  | -1.09 | 0.28295 |
| KIF1C      | 0.07  | 9.47  | 1.08  | 0.28306 |

|               |       |       |       |         |
|---------------|-------|-------|-------|---------|
| CDKN1B        | -0.09 | 9.91  | -1.08 | 0.28307 |
| GLUD2         | -0.14 | 5.48  | -1.08 | 0.28330 |
| SLC5A2        | 0.13  | 5.00  | 1.08  | 0.28332 |
| PDZK1IP1      | 0.27  | 10.49 | 1.08  | 0.28341 |
| L1CAM         | 0.11  | 5.42  | 1.08  | 0.28349 |
| AC106028.3    | -0.13 | 5.39  | -1.08 | 0.28357 |
| RBBP8         | -0.09 | 6.62  | -1.08 | 0.28363 |
| AC138932.4    | 0.10  | 6.01  | 1.08  | 0.28363 |
| IFT43         | 0.11  | 6.85  | 1.08  | 0.28363 |
| AMDHD1        | 0.13  | 4.87  | 1.08  | 0.28374 |
| MORC2-AS1     | 0.16  | 5.59  | 1.08  | 0.28379 |
| H2BC5         | -0.17 | 6.86  | -1.08 | 0.28389 |
| CCR5          | -0.13 | 8.58  | -1.08 | 0.28398 |
| NPEPL1        | 0.14  | 8.47  | 1.08  | 0.28404 |
| LPCAT1        | -0.09 | 11.51 | -1.08 | 0.28406 |
| YES1          | -0.11 | 5.53  | -1.08 | 0.28407 |
| DNAAF5        | 0.08  | 7.64  | 1.08  | 0.28408 |
| BTF3P4        | 0.09  | 5.48  | 1.08  | 0.28408 |
| AC134878.2    | 0.16  | 5.64  | 1.08  | 0.28448 |
| MAP9          | 0.17  | 5.76  | 1.08  | 0.28456 |
| NPHP3         | 0.13  | 6.98  | 1.08  | 0.28458 |
| H3-3B         | -0.13 | 13.62 | -1.08 | 0.28467 |
| ZNF416        | 0.11  | 6.45  | 1.08  | 0.28473 |
| CR1L          | -0.12 | 5.03  | -1.08 | 0.28478 |
| SGMS1-AS1     | 0.10  | 6.68  | 1.08  | 0.28478 |
| VENTX         | -0.15 | 7.93  | -1.08 | 0.28492 |
| SLA           | -0.16 | 11.97 | -1.08 | 0.28506 |
| ZBTB4         | 0.08  | 10.11 | 1.08  | 0.28516 |
| LZTS3         | 0.15  | 5.49  | 1.08  | 0.28519 |
| RAB40B        | 0.12  | 6.10  | 1.08  | 0.28519 |
| RASGRP2       | 0.09  | 12.54 | 1.08  | 0.28550 |
| TRIM26        | -0.07 | 10.20 | -1.08 | 0.28551 |
| FYB1          | 0.14  | 12.15 | 1.08  | 0.28554 |
| SLC41A1       | -0.10 | 7.48  | -1.08 | 0.28558 |
| LINC00467     | 0.08  | 5.59  | 1.08  | 0.28569 |
| CPLANE2       | 0.12  | 6.11  | 1.08  | 0.28569 |
| CTSW          | 0.17  | 12.10 | 1.08  | 0.28581 |
| SERPINB6      | 0.11  | 10.28 | 1.08  | 0.28582 |
| FIP1L1        | 0.07  | 8.43  | 1.08  | 0.28596 |
| RNF185        | -0.07 | 9.17  | -1.08 | 0.28600 |
| AP000787.1    | 0.16  | 6.41  | 1.08  | 0.28617 |
| NBPF11        | -0.13 | 6.93  | -1.08 | 0.28621 |
| JMJD7-PLA2G4B | -0.19 | 6.57  | -1.08 | 0.28634 |
| OVGP1         | -0.14 | 6.02  | -1.08 | 0.28638 |
| LGR6          | -0.19 | 7.50  | -1.08 | 0.28644 |
| ATRN          | -0.09 | 8.17  | -1.08 | 0.28651 |
| TPT1P9        | 0.15  | 9.80  | 1.08  | 0.28659 |
| INPP1         | -0.06 | 7.34  | -1.08 | 0.28662 |
| RPL34P34      | 0.15  | 6.74  | 1.08  | 0.28668 |
| MLH3          | 0.11  | 8.34  | 1.08  | 0.28669 |

|            |       |       |       |         |
|------------|-------|-------|-------|---------|
| SORT1      | -0.17 | 9.47  | -1.08 | 0.28673 |
| PRELID1P1  | 0.11  | 5.78  | 1.08  | 0.28697 |
| HLA-DRB9   | 0.14  | 5.70  | 1.08  | 0.28698 |
| HSP90AA2P  | 0.14  | 7.38  | 1.08  | 0.28703 |
| AL450384.2 | -0.13 | 5.39  | -1.08 | 0.28707 |
| TRBV6-5    | 0.16  | 7.18  | 1.08  | 0.28730 |
| ZNF768     | 0.11  | 7.91  | 1.08  | 0.28731 |
| CCT5P2     | -0.14 | 5.51  | -1.08 | 0.28731 |
| PJA1       | 0.09  | 8.15  | 1.08  | 0.28734 |
| IGLV7-43   | 0.24  | 6.13  | 1.08  | 0.28736 |
| AC009119.1 | -0.13 | 5.79  | -1.07 | 0.28739 |
| SEC14L2    | 0.15  | 5.13  | 1.07  | 0.28752 |
| TMEM229B   | 0.09  | 9.48  | 1.07  | 0.28753 |
| PDGFRB     | -0.21 | 7.15  | -1.07 | 0.28780 |
| ZC3H18     | 0.08  | 10.14 | 1.07  | 0.28792 |
| FAM32A     | 0.07  | 10.34 | 1.07  | 0.28797 |
| ZNF649     | -0.13 | 5.98  | -1.07 | 0.28802 |
| APIP       | -0.07 | 7.01  | -1.07 | 0.28815 |
| ZNF148     | -0.10 | 8.03  | -1.07 | 0.28816 |
| RIDA       | 0.09  | 6.04  | 1.07  | 0.28829 |
| SH3KBP1    | -0.06 | 11.44 | -1.07 | 0.28833 |
| TRBJ2-1    | 0.14  | 6.03  | 1.07  | 0.28835 |
| DCAF13     | -0.09 | 7.43  | -1.07 | 0.28838 |
| RHBDF2     | -0.11 | 10.63 | -1.07 | 0.28845 |
| E2F4       | 0.06  | 10.86 | 1.07  | 0.28846 |
| AC008443.1 | -0.09 | 5.83  | -1.07 | 0.28847 |
| EIF4EBP3   | 0.12  | 5.09  | 1.07  | 0.28892 |
| GABBR1     | -0.18 | 9.58  | -1.07 | 0.28901 |
| TIGD6      | -0.11 | 5.71  | -1.07 | 0.28918 |
| MED20      | -0.09 | 7.29  | -1.07 | 0.28931 |
| HERC6      | -0.17 | 7.81  | -1.07 | 0.28936 |
| MNT        | 0.08  | 9.68  | 1.07  | 0.28958 |
| NFYB       | -0.09 | 7.20  | -1.07 | 0.28968 |
| TUT1       | 0.11  | 7.44  | 1.07  | 0.28970 |
| AL109766.1 | -0.14 | 5.16  | -1.07 | 0.29000 |
| TEC        | -0.12 | 5.58  | -1.07 | 0.29001 |
| SELP       | 0.16  | 7.59  | 1.07  | 0.29005 |
| ATP5PDP4   | 0.10  | 5.99  | 1.07  | 0.29034 |
| STAU2      | -0.10 | 6.94  | -1.07 | 0.29048 |
| LINC00092  | -0.14 | 5.08  | -1.07 | 0.29051 |
| GPX3       | -0.19 | 6.40  | -1.07 | 0.29051 |
| TMEM127    | -0.08 | 11.43 | -1.07 | 0.29055 |
| CARD19     | 0.10  | 9.56  | 1.07  | 0.29062 |
| NBEAL2     | -0.16 | 13.34 | -1.07 | 0.29063 |
| TRAV8-6    | -0.13 | 6.31  | -1.07 | 0.29084 |
| AC007182.2 | 0.17  | 7.61  | 1.07  | 0.29087 |
| ZNF219     | 0.13  | 6.04  | 1.07  | 0.29091 |
| CTNNBIP1   | 0.09  | 8.63  | 1.07  | 0.29099 |
| C6orf226   | 0.11  | 6.10  | 1.07  | 0.29106 |
| DBI        | 0.10  | 9.85  | 1.07  | 0.29143 |

|            |       |       |       |         |
|------------|-------|-------|-------|---------|
| AC006033.2 | -0.14 | 6.31  | -1.07 | 0.29144 |
| SFT2D3     | -0.07 | 7.17  | -1.07 | 0.29150 |
| AC073548.1 | -0.16 | 5.85  | -1.07 | 0.29161 |
| PTENP1     | -0.16 | 6.45  | -1.07 | 0.29161 |
| STAT3      | -0.12 | 12.13 | -1.07 | 0.29175 |
| CEROX1     | 0.22  | 7.18  | 1.07  | 0.29178 |
| RPL41P2    | 0.12  | 7.19  | 1.06  | 0.29188 |
| USP7       | -0.05 | 10.39 | -1.06 | 0.29223 |
| AL627309.5 | -0.19 | 5.37  | -1.06 | 0.29232 |
| PHF13      | 0.08  | 8.07  | 1.06  | 0.29240 |
| KIFAP3     | -0.07 | 7.26  | -1.06 | 0.29249 |
| ZNF317     | -0.06 | 9.31  | -1.06 | 0.29255 |
| CEP83      | -0.11 | 5.60  | -1.06 | 0.29262 |
| PRMT1P1    | 0.11  | 5.11  | 1.06  | 0.29265 |
| APEX2      | 0.08  | 9.02  | 1.06  | 0.29266 |
| LRRN3      | 0.24  | 6.61  | 1.06  | 0.29275 |
| IGHJ6      | 0.21  | 7.50  | 1.06  | 0.29277 |
| TMPRSS3    | 0.13  | 5.34  | 1.06  | 0.29278 |
| PHTF2      | -0.11 | 6.82  | -1.06 | 0.29293 |
| ARL6IP5    | -0.08 | 10.76 | -1.06 | 0.29298 |
| TFAM       | -0.08 | 7.58  | -1.06 | 0.29304 |
| CHD7       | 0.15  | 9.40  | 1.06  | 0.29326 |
| RN7SL368P  | 0.17  | 5.53  | 1.06  | 0.29326 |
| RAPGEF1    | -0.07 | 11.35 | -1.06 | 0.29336 |
| CIRBP      | 0.09  | 11.69 | 1.06  | 0.29336 |
| NPIP5      | -0.16 | 11.77 | -1.06 | 0.29344 |
| AC007877.1 | -0.23 | 6.25  | -1.06 | 0.29361 |
| VPS13A     | -0.10 | 6.86  | -1.06 | 0.29367 |
| STT3A      | -0.07 | 9.49  | -1.06 | 0.29371 |
| TRPC4AP    | -0.08 | 10.97 | -1.06 | 0.29383 |
| BRPF1      | -0.06 | 9.53  | -1.06 | 0.29388 |
| BACE1-AS   | -0.11 | 6.47  | -1.06 | 0.29402 |
| PTPRF      | 0.16  | 5.79  | 1.06  | 0.29410 |
| PLK3       | 0.12  | 8.78  | 1.06  | 0.29425 |
| CLECL1     | -0.15 | 5.18  | -1.06 | 0.29432 |
| NDUFA9     | 0.11  | 7.80  | 1.06  | 0.29437 |
| GLULP4     | -0.15 | 5.46  | -1.06 | 0.29448 |
| IGLV3-27   | 0.25  | 5.26  | 1.06  | 0.29450 |
| OSTF1P1    | -0.14 | 5.73  | -1.06 | 0.29451 |
| TMEM59     | -0.08 | 10.38 | -1.06 | 0.29455 |
| TOMM20P2   | 0.14  | 5.75  | 1.06  | 0.29458 |
| EIF1AXP1   | -0.13 | 5.44  | -1.06 | 0.29463 |
| MEOX1      | 0.15  | 6.16  | 1.06  | 0.29466 |
| AL583856.1 | -0.11 | 5.03  | -1.06 | 0.29467 |
| GPR27      | -0.20 | 7.81  | -1.06 | 0.29468 |
| EIF4EBP2   | -0.07 | 11.17 | -1.06 | 0.29468 |
| TMEM104    | 0.08  | 9.02  | 1.06  | 0.29471 |
| SLC7A1     | -0.09 | 8.03  | -1.06 | 0.29479 |
| RHEX       | -0.14 | 5.25  | -1.06 | 0.29479 |
| NUGGC      | 0.14  | 6.44  | 1.06  | 0.29479 |

|             |       |       |       |         |
|-------------|-------|-------|-------|---------|
| AL049840.6  | 0.10  | 7.23  | 1.06  | 0.29480 |
| NOMO1       | 0.10  | 9.39  | 1.06  | 0.29485 |
| MAP1LC3A    | 0.14  | 7.54  | 1.06  | 0.29514 |
| SERTAD2     | -0.10 | 8.99  | -1.06 | 0.29518 |
| GORASP1     | -0.09 | 8.96  | -1.06 | 0.29522 |
| FAM174A     | -0.12 | 6.44  | -1.06 | 0.29531 |
| DDX23       | 0.05  | 11.00 | 1.06  | 0.29532 |
| SPRY3       | -0.11 | 5.42  | -1.06 | 0.29544 |
| TNFAIP1     | -0.07 | 8.11  | -1.06 | 0.29565 |
| MFSD5       | 0.10  | 9.53  | 1.06  | 0.29567 |
| PLA2G12A    | 0.11  | 7.00  | 1.06  | 0.29570 |
| C5AR1       | -0.16 | 12.74 | -1.06 | 0.29581 |
| MRPL19      | -0.11 | 6.72  | -1.06 | 0.29592 |
| LY6G5C      | 0.10  | 6.95  | 1.06  | 0.29593 |
| PEX11B      | 0.06  | 8.45  | 1.06  | 0.29599 |
| LENG9       | 0.11  | 6.08  | 1.06  | 0.29600 |
| GLI1        | 0.12  | 4.90  | 1.06  | 0.29610 |
| DYNLT3      | -0.10 | 6.69  | -1.06 | 0.29611 |
| EIF3FP3     | 0.14  | 8.59  | 1.06  | 0.29611 |
| CBWD3       | -0.14 | 6.06  | -1.06 | 0.29612 |
| ERVK13-1    | -0.13 | 6.46  | -1.06 | 0.29617 |
| PRKAG2-AS1  | 0.10  | 6.17  | 1.06  | 0.29619 |
| HLA-A       | 0.13  | 15.69 | 1.06  | 0.29632 |
| ADAMTS7P1   | 0.15  | 5.25  | 1.05  | 0.29638 |
| PLA2G7      | -0.16 | 6.38  | -1.05 | 0.29641 |
| PPIAP6      | 0.09  | 5.13  | 1.05  | 0.29642 |
| ABHD5       | -0.16 | 9.32  | -1.05 | 0.29644 |
| TAPT1-AS1   | -0.11 | 5.44  | -1.05 | 0.29657 |
| ITGA7       | -0.13 | 5.44  | -1.05 | 0.29661 |
| BZW2        | 0.08  | 7.97  | 1.05  | 0.29677 |
| PLD2        | 0.10  | 8.55  | 1.05  | 0.29681 |
| AL392172.1  | 0.10  | 5.20  | 1.05  | 0.29681 |
| AC097658.2  | 0.10  | 6.52  | 1.05  | 0.29692 |
| IGKV3-20    | 0.22  | 9.26  | 1.05  | 0.29695 |
| CLDN15      | 0.12  | 8.27  | 1.05  | 0.29713 |
| MANSC1      | -0.22 | 8.38  | -1.05 | 0.29721 |
| LINC00665   | -0.12 | 6.13  | -1.05 | 0.29732 |
| ARHGEF10L   | -0.13 | 8.73  | -1.05 | 0.29733 |
| SCAMP1      | -0.09 | 6.78  | -1.05 | 0.29733 |
| AC127502.2  | -0.19 | 6.35  | -1.05 | 0.29737 |
| AC112191.2  | 0.13  | 6.24  | 1.05  | 0.29746 |
| NONO        | -0.05 | 11.43 | -1.05 | 0.29750 |
| ZNF7        | -0.07 | 7.64  | -1.05 | 0.29757 |
| EEF1A1P10   | 0.09  | 5.60  | 1.05  | 0.29763 |
| KLHL8       | 0.12  | 7.91  | 1.05  | 0.29768 |
| ACSL5       | -0.08 | 9.41  | -1.05 | 0.29769 |
| GEN1        | -0.12 | 5.96  | -1.05 | 0.29772 |
| ZSCAN16-AS1 | 0.11  | 6.64  | 1.05  | 0.29773 |
| OLIG1       | 0.15  | 7.98  | 1.05  | 0.29779 |
| ITLN1       | 0.21  | 5.85  | 1.05  | 0.29783 |



|              |       |       |       |         |
|--------------|-------|-------|-------|---------|
| CHCHD4       | 0.08  | 7.26  | 1.05  | 0.29788 |
| CSTB         | 0.11  | 10.59 | 1.05  | 0.29794 |
| TMEM135      | -0.11 | 6.20  | -1.05 | 0.29816 |
| AC024075.2   | 0.11  | 7.27  | 1.05  | 0.29820 |
| CALM2        | -0.09 | 11.32 | -1.05 | 0.29854 |
| SMPD2        | 0.10  | 7.63  | 1.05  | 0.29855 |
| HBA2         | 0.29  | 13.53 | 1.05  | 0.29865 |
| FARS2        | 0.11  | 7.91  | 1.05  | 0.29881 |
| APTR         | -0.11 | 6.20  | -1.05 | 0.29915 |
| ADAMTSL4-AS2 | -0.19 | 6.80  | -1.05 | 0.29931 |
| TPM3         | -0.06 | 13.04 | -1.05 | 0.29947 |
| AHSP         | 0.32  | 8.65  | 1.05  | 0.29951 |
| RIOX1        | 0.08  | 8.01  | 1.05  | 0.29970 |
| OTUD6B-AS1   | -0.08 | 7.10  | -1.05 | 0.29972 |
| UBE2G2       | 0.06  | 10.29 | 1.05  | 0.29986 |
| PTPN2        | -0.07 | 8.63  | -1.05 | 0.30004 |
| ASB3         | -0.08 | 7.13  | -1.05 | 0.30007 |
| MAGOH        | 0.07  | 8.26  | 1.05  | 0.30007 |
| AL050341.2   | -0.11 | 5.72  | -1.05 | 0.30015 |
| RAC2         | 0.09  | 14.05 | 1.05  | 0.30032 |
| C9orf64      | -0.09 | 6.70  | -1.05 | 0.30050 |
| WFIKK1       | 0.14  | 5.07  | 1.05  | 0.30051 |
| SLC23A2      | -0.11 | 8.58  | -1.05 | 0.30052 |
| FAM238A      | -0.13 | 5.34  | -1.05 | 0.30053 |
| RPL4P5       | 0.14  | 8.13  | 1.05  | 0.30055 |
| CCDC28A      | -0.08 | 9.00  | -1.05 | 0.30056 |
| GPATCH1      | 0.06  | 7.79  | 1.05  | 0.30066 |
| AC006970.1   | -0.15 | 5.62  | -1.05 | 0.30069 |
| WASHC3       | 0.08  | 7.54  | 1.05  | 0.30075 |
| DEK          | -0.09 | 9.21  | -1.05 | 0.30075 |
| TFEC         | -0.12 | 6.65  | -1.05 | 0.30077 |
| LAPTM5       | 0.09  | 14.67 | 1.04  | 0.30090 |
| ZNF512B      | 0.10  | 7.95  | 1.04  | 0.30091 |
| C11orf71     | 0.08  | 6.29  | 1.04  | 0.30094 |
| ASPH         | -0.22 | 7.18  | -1.04 | 0.30101 |
| RPS15AP24    | 0.15  | 6.85  | 1.04  | 0.30110 |
| AC005332.5   | 0.12  | 7.15  | 1.04  | 0.30110 |
| KIAA0100     | -0.06 | 11.07 | -1.04 | 0.30118 |
| TTC22        | 0.09  | 7.59  | 1.04  | 0.30118 |
| ENG          | 0.15  | 9.44  | 1.04  | 0.30146 |
| H4C8         | -0.16 | 6.54  | -1.04 | 0.30149 |
| UGDH         | -0.10 | 6.67  | -1.04 | 0.30153 |
| SNW1         | -0.06 | 9.70  | -1.04 | 0.30154 |
| AL162274.2   | -0.11 | 5.35  | -1.04 | 0.30156 |
| EBAG9        | -0.08 | 7.47  | -1.04 | 0.30163 |
| FAHD2CP      | 0.10  | 6.10  | 1.04  | 0.30168 |
| UBA5         | -0.08 | 6.80  | -1.04 | 0.30178 |
| TRIM13       | 0.09  | 7.73  | 1.04  | 0.30198 |
| TACC3        | 0.10  | 11.45 | 1.04  | 0.30207 |
| ADGRE1       | -0.12 | 9.36  | -1.04 | 0.30209 |

|            |       |       |       |         |
|------------|-------|-------|-------|---------|
| DBNDD1     | 0.18  | 6.69  | 1.04  | 0.30212 |
| USP35      | -0.11 | 6.99  | -1.04 | 0.30243 |
| CDK14      | -0.16 | 6.80  | -1.04 | 0.30247 |
| AP2A1      | 0.08  | 11.48 | 1.04  | 0.30300 |
| TRAF3IP1   | -0.10 | 6.35  | -1.04 | 0.30308 |
| TMBIM4     | 0.12  | 8.18  | 1.04  | 0.30311 |
| HDC        | -0.20 | 7.76  | -1.04 | 0.30313 |
| ODR4       | -0.10 | 6.82  | -1.04 | 0.30322 |
| AL049636.1 | -0.11 | 5.01  | -1.04 | 0.30324 |
| CLCN7      | 0.10  | 10.53 | 1.04  | 0.30332 |
| TRGV2      | -0.17 | 5.30  | -1.04 | 0.30363 |
| SCAI       | 0.09  | 6.10  | 1.04  | 0.30364 |
| PSEN2      | -0.10 | 7.04  | -1.04 | 0.30367 |
| BTD        | 0.07  | 8.00  | 1.04  | 0.30375 |
| ZNF154     | -0.16 | 5.66  | -1.04 | 0.30391 |
| MCM6       | -0.09 | 8.37  | -1.04 | 0.30415 |
| ZNF75A     | 0.10  | 7.72  | 1.04  | 0.30417 |
| DDX20      | -0.09 | 7.29  | -1.04 | 0.30429 |
| WIP12      | 0.06  | 10.97 | 1.04  | 0.30430 |
| P2RX1      | -0.17 | 10.13 | -1.04 | 0.30434 |
| CD84       | 0.12  | 9.47  | 1.04  | 0.30451 |
| ALDH3A2    | -0.08 | 8.38  | -1.04 | 0.30465 |
| C8orf31    | 0.14  | 5.04  | 1.04  | 0.30466 |
| TRIM39     | 0.07  | 7.96  | 1.04  | 0.30486 |
| CRYL1      | 0.10  | 8.24  | 1.04  | 0.30487 |
| RIN1       | 0.16  | 7.45  | 1.04  | 0.30490 |
| CYB561D2   | 0.08  | 8.55  | 1.04  | 0.30511 |
| SELENBP1   | 0.33  | 10.43 | 1.04  | 0.30511 |
| TP53I13    | 0.12  | 8.32  | 1.04  | 0.30528 |
| PBDC1      | 0.09  | 7.71  | 1.04  | 0.30535 |
| CLPB       | 0.09  | 8.20  | 1.04  | 0.30536 |
| AC125238.2 | -0.09 | 5.14  | -1.04 | 0.30538 |
| DLL1       | -0.14 | 5.52  | -1.04 | 0.30538 |
| AL117379.1 | -0.12 | 5.28  | -1.03 | 0.30551 |
| SYPL1      | -0.10 | 8.30  | -1.03 | 0.30554 |
| SLC20A2    | -0.08 | 7.45  | -1.03 | 0.30568 |
| RAB11B-AS1 | 0.11  | 5.78  | 1.03  | 0.30577 |
| CAPN7      | -0.11 | 6.75  | -1.03 | 0.30593 |
| COQ3       | 0.09  | 5.69  | 1.03  | 0.30599 |
| ADCK5      | 0.11  | 7.06  | 1.03  | 0.30608 |
| RAB6B      | 0.16  | 6.40  | 1.03  | 0.30609 |
| TAFA1      | 0.13  | 5.51  | 1.03  | 0.30612 |
| RPS3AP25   | 0.11  | 5.50  | 1.03  | 0.30623 |
| ANAPC7     | 0.06  | 8.95  | 1.03  | 0.30627 |
| HBM        | 0.35  | 10.21 | 1.03  | 0.30628 |
| NKG7       | 0.19  | 12.99 | 1.03  | 0.30629 |
| RRP8       | 0.07  | 8.54  | 1.03  | 0.30636 |
| DLAT       | -0.08 | 6.92  | -1.03 | 0.30646 |
| RWDD3      | -0.12 | 5.15  | -1.03 | 0.30648 |
| AC145098.2 | -0.16 | 5.77  | -1.03 | 0.30650 |

|            |       |       |       |         |
|------------|-------|-------|-------|---------|
| BDP1       | -0.11 | 6.79  | -1.03 | 0.30650 |
| PPP6R3     | -0.06 | 9.32  | -1.03 | 0.30653 |
| FLT3       | -0.18 | 6.28  | -1.03 | 0.30666 |
| LDAH       | 0.08  | 6.93  | 1.03  | 0.30675 |
| AC138207.4 | -0.12 | 5.06  | -1.03 | 0.30687 |
| G2E3       | -0.09 | 6.30  | -1.03 | 0.30688 |
| AL138824.1 | -0.14 | 5.21  | -1.03 | 0.30692 |
| NRBP1      | 0.06  | 11.10 | 1.03  | 0.30697 |
| INO80E     | 0.10  | 9.66  | 1.03  | 0.30704 |
| RNF135     | -0.09 | 8.99  | -1.03 | 0.30709 |
| NUP188     | 0.07  | 9.85  | 1.03  | 0.30713 |
| C3         | -0.17 | 6.52  | -1.03 | 0.30730 |
| USP10      | -0.13 | 10.89 | -1.03 | 0.30732 |
| S100A6     | 0.12  | 12.38 | 1.03  | 0.30736 |
| UPRT       | -0.09 | 6.44  | -1.03 | 0.30738 |
| AC074132.1 | -0.14 | 5.12  | -1.03 | 0.30743 |
| CSTF3      | -0.08 | 7.28  | -1.03 | 0.30750 |
| NDST1      | -0.14 | 10.14 | -1.03 | 0.30764 |
| IFNG       | -0.14 | 5.14  | -1.03 | 0.30776 |
| ZNF283     | 0.10  | 5.84  | 1.03  | 0.30777 |
| AL109618.1 | -0.13 | 5.27  | -1.03 | 0.30785 |
| BTBD11     | 0.09  | 7.77  | 1.03  | 0.30791 |
| TUFT1      | -0.10 | 6.03  | -1.03 | 0.30801 |
| RSAD1      | 0.08  | 9.02  | 1.03  | 0.30807 |
| RPS3AP6    | 0.19  | 9.02  | 1.03  | 0.30815 |
| PDXK       | 0.10  | 10.96 | 1.03  | 0.30818 |
| DTNBP1     | 0.09  | 8.56  | 1.03  | 0.30822 |
| CACNA1H    | 0.15  | 6.00  | 1.03  | 0.30825 |
| LMNB2      | 0.09  | 8.49  | 1.03  | 0.30835 |
| JPH4       | -0.10 | 4.93  | -1.03 | 0.30842 |
| ATAT1      | 0.10  | 6.47  | 1.03  | 0.30862 |
| TMEM60     | 0.08  | 7.76  | 1.03  | 0.30867 |
| TNFRSF25   | 0.15  | 9.42  | 1.03  | 0.30871 |
| KANSL1L    | -0.13 | 5.76  | -1.03 | 0.30875 |
| CBX5       | 0.09  | 8.81  | 1.03  | 0.30886 |
| PDCD10     | -0.09 | 8.17  | -1.03 | 0.30887 |
| TRDV1      | -0.22 | 5.61  | -1.03 | 0.30907 |
| RBBP6      | 0.09  | 9.55  | 1.03  | 0.30911 |
| ARID5A     | 0.11  | 10.12 | 1.03  | 0.30918 |
| IGLV2-18   | 0.26  | 5.49  | 1.03  | 0.30923 |
| PIGT       | 0.07  | 10.37 | 1.03  | 0.30925 |
| SYMPK      | 0.07  | 10.61 | 1.03  | 0.30927 |
| ABCA2      | -0.11 | 10.82 | -1.03 | 0.30932 |
| CAP1P2     | -0.15 | 6.98  | -1.03 | 0.30942 |
| CDH26      | -0.14 | 5.61  | -1.03 | 0.30946 |
| PLEKHA4    | 0.10  | 5.63  | 1.03  | 0.30979 |
| LMNA       | 0.14  | 9.27  | 1.03  | 0.30989 |
| CHRNA1     | 0.09  | 7.69  | 1.03  | 0.30993 |
| AC010168.2 | -0.12 | 5.21  | -1.03 | 0.30994 |
| AC099336.1 | 0.24  | 8.87  | 1.03  | 0.31001 |

|            |       |       |       |         |
|------------|-------|-------|-------|---------|
| EXOSC3     | 0.09  | 6.68  | 1.02  | 0.31016 |
| AL445363.3 | 0.10  | 5.37  | 1.02  | 0.31020 |
| AC092746.1 | -0.18 | 5.05  | -1.02 | 0.31030 |
| A1BG-AS1   | 0.09  | 7.19  | 1.02  | 0.31037 |
| AC090409.1 | 0.14  | 5.88  | 1.02  | 0.31051 |
| PSMD6      | -0.07 | 8.85  | -1.02 | 0.31059 |
| GIGYF1     | 0.09  | 10.70 | 1.02  | 0.31066 |
| TSPY26P    | 0.11  | 5.66  | 1.02  | 0.31067 |
| EMILIN2    | -0.11 | 11.12 | -1.02 | 0.31097 |
| PIGC       | 0.10  | 8.49  | 1.02  | 0.31104 |
| CYCS       | -0.06 | 8.29  | -1.02 | 0.31109 |
| ANKRD36B   | 0.13  | 5.40  | 1.02  | 0.31122 |
| RAB36      | -0.19 | 6.34  | -1.02 | 0.31144 |
| FAM160A2   | -0.11 | 9.57  | -1.02 | 0.31144 |
| OSBPL2     | -0.10 | 10.33 | -1.02 | 0.31149 |
| ZMAT1      | -0.14 | 6.59  | -1.02 | 0.31149 |
| CHRNA2     | -0.19 | 5.44  | -1.02 | 0.31155 |
| MSR1       | -0.18 | 5.29  | -1.02 | 0.31156 |
| RXRB       | 0.06  | 10.29 | 1.02  | 0.31158 |
| ATP5F1BP1  | -0.10 | 5.07  | -1.02 | 0.31162 |
| SLC30A7    | -0.10 | 7.56  | -1.02 | 0.31174 |
| ZBTB10     | -0.11 | 5.90  | -1.02 | 0.31180 |
| RGS2       | -0.19 | 13.15 | -1.02 | 0.31188 |
| ACACB      | 0.08  | 8.14  | 1.02  | 0.31194 |
| DNAJC11    | 0.07  | 9.24  | 1.02  | 0.31197 |
| DDX3Y      | -0.48 | 7.56  | -1.02 | 0.31212 |
| HK3        | -0.13 | 11.62 | -1.02 | 0.31216 |
| QSOX1      | 0.11  | 10.77 | 1.02  | 0.31231 |
| ZMYM1      | -0.11 | 5.70  | -1.02 | 0.31240 |
| FRG1HP     | 0.09  | 6.59  | 1.02  | 0.31242 |
| GSTM4      | 0.18  | 7.62  | 1.02  | 0.31257 |
| TCEAL8     | 0.10  | 7.54  | 1.02  | 0.31262 |
| SMIM14     | -0.07 | 8.66  | -1.02 | 0.31278 |
| RNASE2     | -0.17 | 8.50  | -1.02 | 0.31281 |
| AC008969.1 | -0.13 | 5.94  | -1.02 | 0.31290 |
| MOV10      | -0.14 | 9.99  | -1.02 | 0.31315 |
| GGA3       | -0.07 | 10.45 | -1.02 | 0.31316 |
| DGLUCY     | -0.10 | 10.90 | -1.02 | 0.31317 |
| FZD2       | -0.13 | 7.63  | -1.02 | 0.31320 |
| SLC25A45   | 0.11  | 9.02  | 1.02  | 0.31325 |
| IGF1R      | -0.15 | 9.63  | -1.02 | 0.31328 |
| PROCA1     | 0.12  | 7.29  | 1.02  | 0.31335 |
| TMED4      | -0.05 | 9.65  | -1.02 | 0.31338 |
| ZNF431     | -0.08 | 7.60  | -1.02 | 0.31347 |
| TNFRSF9    | -0.13 | 6.67  | -1.02 | 0.31353 |
| SLC6A16    | 0.10  | 6.09  | 1.02  | 0.31358 |
| CHMP2A     | 0.11  | 11.49 | 1.02  | 0.31361 |
| CEP63      | -0.08 | 9.07  | -1.02 | 0.31363 |
| AC106795.1 | 0.12  | 6.91  | 1.02  | 0.31363 |
| AFG1L      | -0.10 | 5.16  | -1.02 | 0.31363 |

|            |       |       |       |         |
|------------|-------|-------|-------|---------|
| ZRANB1     | -0.10 | 8.47  | -1.02 | 0.31370 |
| TLN2       | -0.10 | 5.29  | -1.02 | 0.31380 |
| TNRC6B     | -0.09 | 9.63  | -1.02 | 0.31391 |
| MED15      | 0.06  | 11.47 | 1.02  | 0.31399 |
| AOC3       | -0.17 | 7.08  | -1.02 | 0.31401 |
| TFB1M      | -0.09 | 6.81  | -1.02 | 0.31402 |
| IFI30      | -0.15 | 5.77  | -1.02 | 0.31410 |
| ISL2       | -0.16 | 6.86  | -1.02 | 0.31428 |
| SBF2-AS1   | 0.09  | 5.22  | 1.02  | 0.31440 |
| MGST1      | -0.14 | 6.90  | -1.02 | 0.31470 |
| COL7A1     | -0.13 | 5.43  | -1.02 | 0.31470 |
| SARDH      | 0.13  | 6.39  | 1.01  | 0.31505 |
| SCRN1      | -0.11 | 7.98  | -1.01 | 0.31505 |
| AC244669.1 | -0.11 | 5.83  | -1.01 | 0.31508 |
| CXCR4      | 0.08  | 12.11 | 1.01  | 0.31537 |
| AC103691.1 | 0.14  | 6.67  | 1.01  | 0.31542 |
| FASN       | 0.10  | 9.45  | 1.01  | 0.31548 |
| HDLBP      | 0.06  | 11.99 | 1.01  | 0.31550 |
| STOML1     | 0.08  | 7.24  | 1.01  | 0.31555 |
| ZFP28      | -0.09 | 5.60  | -1.01 | 0.31569 |
| BTG1P1     | -0.12 | 5.30  | -1.01 | 0.31570 |
| PDCD7      | 0.06  | 8.41  | 1.01  | 0.31576 |
| AL117335.1 | -0.13 | 5.74  | -1.01 | 0.31590 |
| MOB3B      | -0.09 | 5.83  | -1.01 | 0.31598 |
| S1PR2      | 0.11  | 6.68  | 1.01  | 0.31600 |
| SNAI3-AS1  | 0.11  | 6.46  | 1.01  | 0.31614 |
| CCT4       | 0.08  | 10.41 | 1.01  | 0.31621 |
| P3H4       | 0.09  | 6.50  | 1.01  | 0.31629 |
| ENTPD5     | -0.11 | 6.75  | -1.01 | 0.31652 |
| NDUFS2     | 0.05  | 10.23 | 1.01  | 0.31655 |
| COA5       | -0.07 | 7.41  | -1.01 | 0.31660 |
| SIRPD      | -0.13 | 5.42  | -1.01 | 0.31682 |
| SLC6A8     | 0.28  | 9.74  | 1.01  | 0.31719 |
| PDE7B      | -0.12 | 5.04  | -1.01 | 0.31720 |
| LAMTOR1    | 0.10  | 11.15 | 1.01  | 0.31723 |
| NT5DC2     | 0.18  | 7.00  | 1.01  | 0.31734 |
| TIMP1      | 0.14  | 11.42 | 1.01  | 0.31768 |
| KAT14      | 0.07  | 8.20  | 1.01  | 0.31772 |
| PRDX6      | 0.17  | 11.36 | 1.01  | 0.31773 |
| SMIM35     | -0.10 | 5.57  | -1.01 | 0.31773 |
| SUGP2      | -0.11 | 9.95  | -1.01 | 0.31774 |
| USP9Y      | -0.37 | 6.72  | -1.01 | 0.31786 |
| MAGOHB     | -0.11 | 6.30  | -1.01 | 0.31789 |
| EPM2AIP1   | -0.11 | 7.35  | -1.01 | 0.31808 |
| IGHJ4      | 0.22  | 8.56  | 1.01  | 0.31823 |
| C20orf96   | 0.11  | 6.22  | 1.01  | 0.31839 |
| KAT2A      | 0.10  | 9.31  | 1.01  | 0.31850 |
| TECPR2     | -0.15 | 10.42 | -1.01 | 0.31860 |
| ADAMTSL5   | 0.13  | 5.53  | 1.01  | 0.31861 |
| FAM43A     | 0.11  | 8.45  | 1.01  | 0.31873 |

|            |       |       |       |         |
|------------|-------|-------|-------|---------|
| PCMT1      | -0.07 | 9.31  | -1.01 | 0.31886 |
| MFF        | 0.06  | 8.90  | 1.01  | 0.31891 |
| SMCO4      | -0.11 | 8.22  | -1.01 | 0.31891 |
| PARP1      | 0.08  | 10.87 | 1.01  | 0.31893 |
| GATAD1     | -0.07 | 7.98  | -1.01 | 0.31898 |
| ZNF324B    | 0.09  | 6.39  | 1.01  | 0.31900 |
| AEN        | 0.10  | 8.37  | 1.01  | 0.31901 |
| ARHGAP25   | -0.08 | 12.43 | -1.01 | 0.31908 |
| GMPPB      | 0.06  | 8.30  | 1.01  | 0.31921 |
| CHTF8      | 0.09  | 5.17  | 1.01  | 0.31934 |
| AL162231.2 | 0.10  | 5.30  | 1.01  | 0.31948 |
| RNF125     | 0.10  | 8.51  | 1.01  | 0.31950 |
| PRRC2B     | 0.05  | 11.72 | 1.00  | 0.31973 |
| TBC1D4     | -0.14 | 7.57  | -1.00 | 0.31994 |
| TRAF3IP3   | 0.06  | 11.76 | 1.00  | 0.32001 |
| ZNF202     | -0.09 | 7.41  | -1.00 | 0.32048 |
| AC110749.1 | 0.11  | 6.07  | 1.00  | 0.32053 |
| EGLN3      | 0.10  | 5.91  | 1.00  | 0.32059 |
| AC092279.3 | 0.16  | 5.55  | 1.00  | 0.32060 |
| CSRNP1     | -0.15 | 9.45  | -1.00 | 0.32081 |
| SLC25A12   | -0.07 | 7.79  | -1.00 | 0.32084 |
| SLC25A16   | 0.09  | 7.03  | 1.00  | 0.32090 |
| COX5B      | 0.10  | 10.92 | 1.00  | 0.32093 |
| GUCD1      | 0.09  | 10.68 | 1.00  | 0.32097 |
| AL512625.3 | -0.11 | 5.21  | -1.00 | 0.32103 |
| NGDN       | 0.07  | 8.29  | 1.00  | 0.32106 |
| XPC        | -0.06 | 10.31 | -1.00 | 0.32118 |
| MED17      | -0.07 | 6.45  | -1.00 | 0.32120 |
| AC007342.2 | -0.16 | 5.77  | -1.00 | 0.32122 |
| GATC       | 0.08  | 7.86  | 1.00  | 0.32126 |
| CDK7       | -0.08 | 7.02  | -1.00 | 0.32140 |
| VPS35L     | 0.08  | 8.92  | 1.00  | 0.32146 |
| RAB7A      | -0.10 | 11.96 | -1.00 | 0.32166 |
| SEPTIN4    | -0.15 | 6.47  | -1.00 | 0.32176 |
| CCDC157    | 0.11  | 6.24  | 1.00  | 0.32192 |
| KRT73-AS1  | 0.17  | 5.43  | 1.00  | 0.32206 |
| AC026748.1 | 0.10  | 5.25  | 1.00  | 0.32208 |
| NUDT16     | -0.12 | 9.21  | -1.00 | 0.32209 |
| OLFML2B    | -0.10 | 5.33  | -1.00 | 0.32225 |
| UNC45B     | 0.13  | 4.94  | 1.00  | 0.32230 |
| CNTLN      | 0.10  | 5.74  | 1.00  | 0.32241 |
| LINC00824  | 0.13  | 5.32  | 1.00  | 0.32244 |
| RPL7P6     | 0.09  | 5.40  | 1.00  | 0.32258 |
| SNX8       | 0.10  | 8.59  | 1.00  | 0.32263 |
| ZNF205     | -0.15 | 5.27  | -1.00 | 0.32267 |
| DMKN       | 0.11  | 5.18  | 1.00  | 0.32275 |
| CASP7      | -0.10 | 7.55  | -1.00 | 0.32299 |
| CRY2       | 0.06  | 9.07  | 1.00  | 0.32310 |
| CREBL2     | -0.08 | 8.77  | -1.00 | 0.32312 |
| CBR3       | 0.14  | 6.57  | 1.00  | 0.32313 |

|            |       |       |       |         |
|------------|-------|-------|-------|---------|
| CLNS1A     | 0.07  | 8.91  | 1.00  | 0.32322 |
| AP001636.3 | -0.11 | 5.23  | -1.00 | 0.32325 |
| MAN2B1     | 0.08  | 11.79 | 1.00  | 0.32331 |
| SF3A3      | 0.07  | 9.86  | 1.00  | 0.32340 |
| MAST4      | 0.12  | 7.19  | 1.00  | 0.32366 |
| CNNM3      | -0.06 | 9.42  | -1.00 | 0.32381 |
| SIGLEC9    | -0.11 | 10.01 | -1.00 | 0.32383 |
| GCNT4      | -0.14 | 6.01  | -1.00 | 0.32392 |
| MTERF3     | -0.10 | 6.39  | -1.00 | 0.32394 |
| PHIP       | 0.15  | 9.41  | 1.00  | 0.32417 |
| SLC24A1    | -0.10 | 5.92  | -1.00 | 0.32418 |
| WDR3       | -0.10 | 7.27  | -1.00 | 0.32424 |
| HMGB2P1    | -0.12 | 5.06  | -1.00 | 0.32425 |
| FAM120B    | -0.05 | 9.02  | -1.00 | 0.32431 |
| HLA-J      | 0.30  | 8.93  | 0.99  | 0.32448 |
| DGKZP1     | 0.12  | 8.13  | 0.99  | 0.32450 |
| AL356000.1 | -0.11 | 5.64  | -0.99 | 0.32457 |
| ZNF780A    | -0.06 | 7.41  | -0.99 | 0.32468 |
| ALS2CL     | 0.17  | 7.80  | 0.99  | 0.32475 |
| ZNF652     | -0.06 | 9.93  | -0.99 | 0.32475 |
| GPSM1      | 0.10  | 6.12  | 0.99  | 0.32477 |
| FIGNL2     | 0.10  | 5.20  | 0.99  | 0.32480 |
| C17orf80   | -0.07 | 7.29  | -0.99 | 0.32486 |
| ACE        | 0.12  | 6.01  | 0.99  | 0.32488 |
| SETD4      | -0.08 | 7.65  | -0.99 | 0.32489 |
| AL031274.1 | -0.11 | 5.29  | -0.99 | 0.32500 |
| NFIX       | 0.24  | 9.21  | 0.99  | 0.32502 |
| FTH1P22    | -0.13 | 5.59  | -0.99 | 0.32513 |
| MIR4453HG  | -0.13 | 5.26  | -0.99 | 0.32516 |
| ALAS2      | 0.35  | 12.88 | 0.99  | 0.32520 |
| SIGLEC17P  | -0.15 | 7.33  | -0.99 | 0.32522 |
| AC021683.5 | -0.18 | 5.71  | -0.99 | 0.32531 |
| AL356488.3 | 0.14  | 5.33  | 0.99  | 0.32539 |
| VPS33B     | 0.10  | 6.21  | 0.99  | 0.32546 |
| LMO4       | -0.08 | 8.84  | -0.99 | 0.32547 |
| AC104463.2 | -0.13 | 5.25  | -0.99 | 0.32555 |
| PSMG4      | 0.09  | 7.22  | 0.99  | 0.32567 |
| SLC35E2B   | -0.12 | 9.80  | -0.99 | 0.32571 |
| ZNF271P    | 0.09  | 8.23  | 0.99  | 0.32580 |
| ZNF506     | -0.08 | 8.20  | -0.99 | 0.32584 |
| VEPH1      | 0.12  | 5.08  | 0.99  | 0.32585 |
| ZNF420     | 0.10  | 6.46  | 0.99  | 0.32590 |
| SFXN4      | 0.11  | 7.04  | 0.99  | 0.32596 |
| TCEA1      | -0.09 | 7.82  | -0.99 | 0.32608 |
| FAM95C     | -0.12 | 5.31  | -0.99 | 0.32662 |
| SERPINF1   | 0.14  | 6.80  | 0.99  | 0.32668 |
| PRSS53     | -0.11 | 5.54  | -0.99 | 0.32690 |
| CDYL       | 0.09  | 7.97  | 0.99  | 0.32706 |
| ZNF516     | -0.12 | 9.71  | -0.99 | 0.32727 |
| BRICD5     | 0.12  | 7.06  | 0.99  | 0.32728 |

|                           |       |       |       |         |
|---------------------------|-------|-------|-------|---------|
| REPIN1                    | 0.07  | 9.89  | 0.99  | 0.32730 |
| ADD2                      | 0.11  | 6.69  | 0.99  | 0.32737 |
| EEF1A1P14                 | 0.11  | 6.52  | 0.99  | 0.32741 |
| ESYT1                     | 0.07  | 11.98 | 0.99  | 0.32744 |
| BUD31                     | 0.10  | 10.19 | 0.99  | 0.32744 |
| DARS2                     | -0.09 | 6.98  | -0.99 | 0.32758 |
| TMEM208                   | 0.11  | 8.80  | 0.99  | 0.32776 |
| CALM2P2                   | -0.13 | 6.29  | -0.99 | 0.32777 |
| PI4KA                     | -0.06 | 10.90 | -0.99 | 0.32809 |
| PDCL                      | -0.08 | 7.35  | -0.99 | 0.32816 |
| RNY1                      | 0.20  | 5.23  | 0.99  | 0.32817 |
| CCP110                    | -0.09 | 7.14  | -0.99 | 0.32818 |
| AKR1A1                    | 0.09  | 9.76  | 0.99  | 0.32821 |
| WASF1                     | -0.12 | 5.07  | -0.99 | 0.32829 |
| NLN                       | -0.09 | 6.79  | -0.99 | 0.32833 |
| CSDE1                     | -0.06 | 12.00 | -0.99 | 0.32833 |
| PI4KB                     | 0.05  | 10.96 | 0.99  | 0.32837 |
| LINC00894                 | -0.14 | 6.10  | -0.99 | 0.32843 |
| SLC25A39                  | 0.27  | 14.62 | 0.99  | 0.32848 |
| CNIH3                     | 0.14  | 5.96  | 0.99  | 0.32848 |
| STK17B                    | -0.09 | 10.23 | -0.99 | 0.32848 |
| KAT2B                     | -0.15 | 8.49  | -0.99 | 0.32869 |
| AC240565.4                | -0.21 | 7.46  | -0.99 | 0.32878 |
| HSPH1                     | -0.08 | 8.66  | -0.99 | 0.32890 |
| DLG1                      | 0.11  | 7.70  | 0.99  | 0.32891 |
| TERF2                     | 0.06  | 8.75  | 0.99  | 0.32906 |
| AL592295.5                | 0.14  | 5.46  | 0.99  | 0.32910 |
| ITGB3                     | 0.22  | 8.71  | 0.99  | 0.32910 |
| MAPK9                     | -0.06 | 8.09  | -0.99 | 0.32916 |
| ACADSB                    | -0.09 | 6.92  | -0.98 | 0.32921 |
| VPS45                     | -0.06 | 8.32  | -0.98 | 0.32922 |
| NDUFA12                   | 0.10  | 8.90  | 0.98  | 0.32935 |
| COL6A2                    | -0.17 | 9.55  | -0.98 | 0.32955 |
| PRAM1                     | 0.12  | 11.52 | 0.98  | 0.32958 |
| DTX4                      | 0.10  | 7.53  | 0.98  | 0.32968 |
| HNRNPA3                   | -0.06 | 10.27 | -0.98 | 0.32973 |
| HRK                       | -0.15 | 5.20  | -0.98 | 0.32975 |
| AC022968.1                | 0.11  | 5.41  | 0.98  | 0.33001 |
| RFK                       | -0.10 | 6.62  | -0.98 | 0.33021 |
| AC005670.3                | -0.10 | 6.85  | -0.98 | 0.33036 |
| ARHGAP27P1-BPTFP1-KPNA2P3 | -0.12 | 7.10  | -0.98 | 0.33037 |
| HSPA1L                    | 0.08  | 7.29  | 0.98  | 0.33042 |
| FDXACB1                   | -0.09 | 5.48  | -0.98 | 0.33044 |
| AL365475.1                | 0.16  | 5.97  | 0.98  | 0.33045 |
| AC231533.2                | -0.10 | 5.71  | -0.98 | 0.33046 |
| UPK3A                     | 0.17  | 6.16  | 0.98  | 0.33047 |
| TBRG4                     | 0.07  | 9.41  | 0.98  | 0.33051 |
| ARHGEF4                   | -0.10 | 5.63  | -0.98 | 0.33068 |
| POLR2J2                   | 0.14  | 5.22  | 0.98  | 0.33069 |
| ANKRD22                   | -0.23 | 6.32  | -0.98 | 0.33071 |



|              |       |       |       |         |
|--------------|-------|-------|-------|---------|
| AL844908.1   | -0.11 | 6.04  | -0.98 | 0.33073 |
| MRPL49       | 0.06  | 9.25  | 0.98  | 0.33079 |
| PFDN1        | 0.08  | 8.54  | 0.98  | 0.33082 |
| FBXL20       | -0.08 | 8.82  | -0.98 | 0.33082 |
| ACTB         | 0.10  | 17.44 | 0.98  | 0.33098 |
| AC008763.1   | -0.12 | 5.67  | -0.98 | 0.33108 |
| PSTPIP1      | 0.09  | 11.75 | 0.98  | 0.33122 |
| FAM86FP      | -0.12 | 5.12  | -0.98 | 0.33123 |
| SELPLG       | 0.11  | 14.29 | 0.98  | 0.33130 |
| EXD2         | -0.09 | 6.44  | -0.98 | 0.33188 |
| MAP3K10      | 0.10  | 7.57  | 0.98  | 0.33189 |
| ARHGEF1      | 0.08  | 13.53 | 0.98  | 0.33205 |
| SUPT4H1P2    | -0.11 | 5.32  | -0.98 | 0.33207 |
| ZNRD1ASP     | -0.11 | 6.05  | -0.98 | 0.33208 |
| VAMP1        | -0.13 | 8.94  | -0.98 | 0.33223 |
| RPL39        | 0.14  | 9.14  | 0.98  | 0.33223 |
| ZNF514       | -0.11 | 6.85  | -0.98 | 0.33229 |
| OASL         | -0.25 | 9.38  | -0.98 | 0.33232 |
| CYB561       | 0.09  | 8.82  | 0.98  | 0.33249 |
| CCDC43       | -0.07 | 6.75  | -0.98 | 0.33256 |
| TMEM161B-AS1 | -0.10 | 6.90  | -0.98 | 0.33282 |
| LRRC8C       | -0.07 | 8.72  | -0.98 | 0.33291 |
| GGH          | -0.10 | 5.21  | -0.98 | 0.33296 |
| AC107464.3   | 0.10  | 5.12  | 0.98  | 0.33304 |
| NUDT2        | 0.12  | 7.78  | 0.98  | 0.33324 |
| NUDT13       | 0.12  | 5.38  | 0.98  | 0.33326 |
| C2CD2        | -0.10 | 6.73  | -0.98 | 0.33331 |
| BAG6         | 0.09  | 12.57 | 0.98  | 0.33331 |
| NCK2         | 0.08  | 9.84  | 0.98  | 0.33341 |
| PLIN3        | 0.10  | 10.94 | 0.98  | 0.33350 |
| LINC01962    | 0.13  | 4.95  | 0.98  | 0.33358 |
| AC022167.3   | 0.17  | 6.20  | 0.98  | 0.33361 |
| INO80D       | -0.08 | 7.90  | -0.98 | 0.33377 |
| AL117336.2   | -0.12 | 4.97  | -0.98 | 0.33384 |
| IGHV3-20     | -0.28 | 6.16  | -0.98 | 0.33386 |
| EML2-AS1     | 0.15  | 5.51  | 0.98  | 0.33392 |
| LINC02580    | 0.14  | 5.79  | 0.98  | 0.33401 |
| LAX1         | 0.11  | 7.83  | 0.98  | 0.33401 |
| ZKSCAN8      | -0.08 | 7.32  | -0.97 | 0.33442 |
| IL18RAP      | -0.26 | 9.63  | -0.97 | 0.33443 |
| P2RY12       | -0.12 | 5.59  | -0.97 | 0.33452 |
| TVP23B       | -0.10 | 6.65  | -0.97 | 0.33454 |
| RPSAP47      | 0.12  | 6.22  | 0.97  | 0.33461 |
| AC009113.1   | -0.08 | 5.50  | -0.97 | 0.33465 |
| PLXNB2       | -0.13 | 11.91 | -0.97 | 0.33469 |
| NBPF9        | -0.12 | 6.65  | -0.97 | 0.33473 |
| RPL5P5       | 0.10  | 5.35  | 0.97  | 0.33473 |
| DDTL         | 0.12  | 5.45  | 0.97  | 0.33477 |
| AC110285.2   | -0.14 | 5.59  | -0.97 | 0.33485 |
| ALG14        | 0.10  | 5.74  | 0.97  | 0.33486 |

|             |       |       |       |         |
|-------------|-------|-------|-------|---------|
| PRPF38B     | 0.08  | 9.91  | 0.97  | 0.33496 |
| FBXO4       | -0.08 | 6.27  | -0.97 | 0.33506 |
| IGKV3-11    | 0.19  | 8.43  | 0.97  | 0.33524 |
| STK11IP     | 0.08  | 9.69  | 0.97  | 0.33535 |
| GAK         | 0.06  | 11.26 | 0.97  | 0.33541 |
| BCL2A1      | -0.19 | 9.21  | -0.97 | 0.33543 |
| RHNO1       | 0.07  | 7.70  | 0.97  | 0.33545 |
| PPM1L       | -0.10 | 6.82  | -0.97 | 0.33564 |
| GRINA       | 0.15  | 12.39 | 0.97  | 0.33578 |
| TRAM2-AS1   | -0.10 | 5.29  | -0.97 | 0.33589 |
| ZBTB5       | -0.08 | 7.43  | -0.97 | 0.33591 |
| YBX3        | 0.24  | 12.48 | 0.97  | 0.33595 |
| MBNL2       | -0.08 | 6.93  | -0.97 | 0.33602 |
| GATAD2B     | -0.06 | 9.86  | -0.97 | 0.33604 |
| RGL2        | -0.13 | 11.43 | -0.97 | 0.33605 |
| ANKRD46     | -0.09 | 6.16  | -0.97 | 0.33617 |
| MIAT        | -0.19 | 8.61  | -0.97 | 0.33619 |
| QSOX2       | -0.11 | 8.03  | -0.97 | 0.33633 |
| RPS6KL1     | 0.14  | 5.43  | 0.97  | 0.33635 |
| ATP8A2      | 0.11  | 5.45  | 0.97  | 0.33639 |
| H3P16       | -0.15 | 8.67  | -0.97 | 0.33641 |
| ZNF429      | -0.17 | 7.50  | -0.97 | 0.33653 |
| MYOM1       | -0.11 | 6.31  | -0.97 | 0.33661 |
| ANKRD10-IT1 | 0.12  | 5.67  | 0.97  | 0.33661 |
| CNTNAP3     | -0.22 | 6.76  | -0.97 | 0.33665 |
| CC2D1B      | 0.06  | 9.72  | 0.97  | 0.33669 |
| GLUL        | -0.13 | 12.69 | -0.97 | 0.33669 |
| IMPDH1P6    | -0.11 | 5.27  | -0.97 | 0.33674 |
| PTGDR       | -0.12 | 6.90  | -0.97 | 0.33682 |
| GTF2B       | -0.07 | 8.66  | -0.97 | 0.33713 |
| GYG1        | -0.14 | 9.19  | -0.97 | 0.33722 |
| LTK         | 0.17  | 7.30  | 0.97  | 0.33724 |
| ZNF629      | 0.09  | 7.43  | 0.97  | 0.33726 |
| SS18L1      | -0.10 | 6.85  | -0.97 | 0.33728 |
| HPGD        | -0.11 | 5.61  | -0.97 | 0.33746 |
| U73166.1    | 0.17  | 5.10  | 0.97  | 0.33770 |
| PCBD1       | 0.10  | 7.31  | 0.97  | 0.33771 |
| AC068522.1  | 0.15  | 5.27  | 0.97  | 0.33784 |
| CEP104      | -0.06 | 8.33  | -0.97 | 0.33787 |
| GOLPH3L     | -0.08 | 7.18  | -0.97 | 0.33790 |
| ANKRD37     | -0.11 | 5.69  | -0.97 | 0.33795 |
| AC104651.1  | -0.13 | 5.49  | -0.97 | 0.33800 |
| CHAF1A      | 0.08  | 8.07  | 0.97  | 0.33805 |
| OBSCN       | 0.15  | 8.97  | 0.97  | 0.33809 |
| KIFC2       | 0.14  | 8.29  | 0.97  | 0.33812 |
| VWA7        | 0.12  | 5.66  | 0.97  | 0.33819 |
| TPTEP1      | 0.16  | 6.56  | 0.97  | 0.33836 |
| ADSS1       | -0.12 | 5.50  | -0.97 | 0.33844 |
| RBM4B       | 0.06  | 7.89  | 0.97  | 0.33852 |
| AL157895.2  | -0.12 | 5.13  | -0.97 | 0.33853 |

|            |       |       |       |         |
|------------|-------|-------|-------|---------|
| EID2B      | 0.13  | 5.44  | 0.97  | 0.33858 |
| SH2B1      | 0.10  | 9.95  | 0.97  | 0.33860 |
| MFSD9      | -0.12 | 7.31  | -0.97 | 0.33863 |
| TMEM248    | 0.05  | 10.49 | 0.97  | 0.33869 |
| MAP3K20    | -0.10 | 7.58  | -0.97 | 0.33870 |
| PPM1A      | -0.12 | 9.81  | -0.97 | 0.33876 |
| GET1       | 0.11  | 6.01  | 0.97  | 0.33877 |
| MMAA       | 0.11  | 6.30  | 0.97  | 0.33888 |
| GNB1       | -0.06 | 12.51 | -0.97 | 0.33892 |
| RPP30      | -0.10 | 7.67  | -0.97 | 0.33895 |
| CCDC28B    | 0.12  | 7.23  | 0.97  | 0.33903 |
| H3P14      | -0.08 | 5.09  | -0.96 | 0.33904 |
| ITGA6      | -0.13 | 8.16  | -0.96 | 0.33909 |
| DCST2      | -0.14 | 5.31  | -0.96 | 0.33917 |
| LINC02289  | -0.21 | 7.20  | -0.96 | 0.33920 |
| DIRAS1     | 0.15  | 5.41  | 0.96  | 0.33921 |
| HOXB-AS1   | 0.16  | 5.73  | 0.96  | 0.33936 |
| IGLV1-36   | 0.20  | 5.40  | 0.96  | 0.33938 |
| SUPT16H    | -0.05 | 9.89  | -0.96 | 0.33947 |
| TRIM44     | 0.08  | 9.84  | 0.96  | 0.33951 |
| ARPIN      | -0.18 | 6.84  | -0.96 | 0.33957 |
| AC005747.1 | -0.15 | 11.10 | -0.96 | 0.33975 |
| RBM14      | 0.05  | 9.88  | 0.96  | 0.34003 |
| TFRC       | -0.13 | 7.37  | -0.96 | 0.34004 |
| ZNF668     | 0.11  | 7.67  | 0.96  | 0.34009 |
| AL391834.2 | -0.10 | 5.10  | -0.96 | 0.34013 |
| RPS4XP13   | 0.14  | 6.87  | 0.96  | 0.34025 |
| JAGN1      | 0.09  | 8.19  | 0.96  | 0.34027 |
| KCNG1      | 0.19  | 5.93  | 0.96  | 0.34034 |
| IGHV4-61   | 0.21  | 7.02  | 0.96  | 0.34041 |
| Z95327.2   | -0.15 | 5.27  | -0.96 | 0.34047 |
| PRRT1      | 0.13  | 5.40  | 0.96  | 0.34073 |
| SLC30A9    | -0.07 | 7.48  | -0.96 | 0.34080 |
| GON4L      | -0.06 | 9.67  | -0.96 | 0.34088 |
| AC009318.1 | 0.11  | 5.86  | 0.96  | 0.34110 |
| GATA1      | 0.20  | 8.71  | 0.96  | 0.34125 |
| EXOC7      | 0.05  | 11.12 | 0.96  | 0.34132 |
| BSDC1      | -0.05 | 9.86  | -0.96 | 0.34140 |
| NUDT3      | 0.06  | 10.00 | 0.96  | 0.34152 |
| LIPT2      | 0.10  | 5.42  | 0.96  | 0.34177 |
| AC113935.1 | 0.15  | 8.92  | 0.96  | 0.34191 |
| SUGT1      | -0.08 | 7.84  | -0.96 | 0.34192 |
| RBBP9      | -0.09 | 6.00  | -0.96 | 0.34197 |
| RIOK3      | -0.14 | 9.33  | -0.96 | 0.34200 |
| TMEM209    | -0.10 | 6.63  | -0.96 | 0.34203 |
| MRPL46     | -0.10 | 5.19  | -0.96 | 0.34203 |
| ZKSCAN2    | 0.07  | 6.36  | 0.96  | 0.34213 |
| ACAD8      | -0.06 | 8.41  | -0.96 | 0.34213 |
| CPSF3      | 0.06  | 8.39  | 0.96  | 0.34225 |
| RNU7-40P   | 0.14  | 4.99  | 0.96  | 0.34246 |

|            |       |       |       |         |
|------------|-------|-------|-------|---------|
| ATG4B      | 0.07  | 10.36 | 0.96  | 0.34250 |
| NR2F6      | 0.12  | 5.93  | 0.96  | 0.34250 |
| AC079336.5 | 0.14  | 5.12  | 0.96  | 0.34251 |
| TCEANC     | -0.11 | 6.62  | -0.96 | 0.34254 |
| CD247      | 0.10  | 11.92 | 0.96  | 0.34257 |
| ZNF528-AS1 | 0.11  | 5.63  | 0.96  | 0.34260 |
| OLMALINC   | 0.09  | 5.46  | 0.96  | 0.34262 |
| DPY19L4    | -0.11 | 5.61  | -0.96 | 0.34265 |
| IDH3B      | 0.07  | 10.26 | 0.96  | 0.34274 |
| VHL        | 0.08  | 9.08  | 0.96  | 0.34274 |
| SH3GL1P1   | 0.11  | 5.22  | 0.96  | 0.34277 |
| TRGV3      | -0.16 | 5.55  | -0.96 | 0.34284 |
| PGDP1      | -0.15 | 7.02  | -0.96 | 0.34287 |
| SCPEP1     | -0.09 | 10.36 | -0.96 | 0.34342 |
| AF274858.1 | 0.08  | 5.07  | 0.96  | 0.34342 |
| B4GALT1    | -0.08 | 10.81 | -0.96 | 0.34342 |
| C5orf30    | 0.11  | 5.88  | 0.96  | 0.34343 |
| AL008721.2 | -0.09 | 5.38  | -0.96 | 0.34343 |
| TPST1      | -0.22 | 6.76  | -0.96 | 0.34345 |
| EXOC3L1    | -0.19 | 5.24  | -0.96 | 0.34348 |
| EBF4       | 0.13  | 6.03  | 0.96  | 0.34361 |
| NEIL1      | 0.14  | 7.22  | 0.96  | 0.34363 |
| TBC1D15    | -0.09 | 8.08  | -0.96 | 0.34363 |
| HSPA5      | -0.07 | 11.92 | -0.96 | 0.34365 |
| FASTKD5    | -0.06 | 8.09  | -0.96 | 0.34374 |
| DPH3       | -0.09 | 7.98  | -0.96 | 0.34380 |
| TLCD2      | 0.11  | 5.07  | 0.96  | 0.34390 |
| TBCCD1     | -0.08 | 6.37  | -0.95 | 0.34414 |
| AQP10      | 0.20  | 6.44  | 0.95  | 0.34416 |
| IGSF9B     | 0.14  | 7.15  | 0.95  | 0.34424 |
| CISD2      | 0.10  | 7.36  | 0.95  | 0.34428 |
| UBE2E2     | -0.09 | 7.19  | -0.95 | 0.34428 |
| AC107884.1 | -0.12 | 5.65  | -0.95 | 0.34432 |
| HEY1       | -0.14 | 5.18  | -0.95 | 0.34433 |
| UBE2D3-AS1 | -0.08 | 5.19  | -0.95 | 0.34443 |
| SCD        | -0.12 | 6.37  | -0.95 | 0.34447 |
| TRBV4-1    | 0.20  | 6.55  | 0.95  | 0.34447 |
| CCDC102A   | 0.11  | 7.26  | 0.95  | 0.34513 |
| TRPM6      | -0.17 | 6.92  | -0.95 | 0.34521 |
| ZNF615     | -0.10 | 6.06  | -0.95 | 0.34527 |
| AC131212.3 | 0.10  | 5.21  | 0.95  | 0.34550 |
| TRBV27     | 0.15  | 6.57  | 0.95  | 0.34555 |
| ZNF562     | 0.07  | 7.77  | 0.95  | 0.34557 |
| CBX4       | 0.08  | 8.74  | 0.95  | 0.34560 |
| IDH3A      | -0.08 | 8.51  | -0.95 | 0.34562 |
| DCAF15     | 0.06  | 10.07 | 0.95  | 0.34562 |
| NUDCD2     | 0.09  | 7.05  | 0.95  | 0.34564 |
| AP001992.1 | -0.13 | 6.07  | -0.95 | 0.34575 |
| SVBP       | 0.11  | 7.84  | 0.95  | 0.34576 |
| AC010468.1 | 0.15  | 6.75  | 0.95  | 0.34577 |

|            |       |       |       |         |
|------------|-------|-------|-------|---------|
| AC024060.2 | -0.11 | 5.27  | -0.95 | 0.34582 |
| ITGA5      | -0.09 | 11.81 | -0.95 | 0.34584 |
| PPP2R5A    | -0.09 | 9.64  | -0.95 | 0.34602 |
| RANBP10    | 0.13  | 9.52  | 0.95  | 0.34612 |
| CLPTM1L    | 0.06  | 10.62 | 0.95  | 0.34614 |
| AC104083.1 | -0.10 | 5.05  | -0.95 | 0.34615 |
| RAD17      | -0.07 | 7.28  | -0.95 | 0.34622 |
| MDK        | -0.13 | 5.47  | -0.95 | 0.34634 |
| KMO        | -0.13 | 6.46  | -0.95 | 0.34635 |
| SLC2A3     | -0.15 | 11.43 | -0.95 | 0.34637 |
| FCGR1A     | -0.24 | 8.47  | -0.95 | 0.34650 |
| NSUN3      | -0.12 | 7.44  | -0.95 | 0.34659 |
| FAM98A     | -0.08 | 6.83  | -0.95 | 0.34668 |
| AC078991.1 | 0.10  | 5.43  | 0.95  | 0.34676 |
| CCDC66     | 0.08  | 7.22  | 0.95  | 0.34678 |
| TGFB1      | -0.12 | 11.66 | -0.95 | 0.34687 |
| SLC5A9     | -0.18 | 5.42  | -0.95 | 0.34702 |
| MTG1       | 0.11  | 7.06  | 0.95  | 0.34708 |
| ACTR1A     | 0.06  | 10.98 | 0.95  | 0.34717 |
| GPSM2      | -0.10 | 5.83  | -0.95 | 0.34764 |
| KIAA1522   | -0.11 | 6.21  | -0.95 | 0.34771 |
| RGS16      | 0.12  | 5.27  | 0.95  | 0.34773 |
| DNAH1      | -0.12 | 9.40  | -0.95 | 0.34775 |
| LRPPRC     | -0.07 | 9.19  | -0.95 | 0.34787 |
| DNAJC27    | -0.08 | 5.79  | -0.95 | 0.34798 |
| CXorf56    | 0.07  | 7.80  | 0.95  | 0.34800 |
| CCNY       | -0.06 | 10.50 | -0.95 | 0.34808 |
| NUMA1      | 0.06  | 12.21 | 0.95  | 0.34810 |
| TMEM185A   | 0.07  | 7.14  | 0.95  | 0.34811 |
| NAAA       | -0.12 | 9.92  | -0.95 | 0.34830 |
| GRAMD4     | -0.09 | 8.92  | -0.95 | 0.34835 |
| KAT8       | 0.06  | 10.19 | 0.95  | 0.34857 |
| ANKMY2     | -0.07 | 7.05  | -0.95 | 0.34873 |
| VRK1       | 0.07  | 7.24  | 0.95  | 0.34875 |
| AC005332.6 | -0.07 | 8.09  | -0.95 | 0.34884 |
| AC022306.1 | -0.09 | 5.00  | -0.95 | 0.34891 |
| TMEM263    | 0.11  | 6.86  | 0.95  | 0.34902 |
| GGTA1P     | -0.12 | 7.07  | -0.94 | 0.34930 |
| AL031777.2 | -0.13 | 5.49  | -0.94 | 0.34933 |
| GCNA       | -0.11 | 6.21  | -0.94 | 0.34935 |
| HNRNPKP2   | -0.12 | 6.56  | -0.94 | 0.34943 |
| CCNE1      | 0.09  | 5.53  | 0.94  | 0.34946 |
| CAPG       | 0.12  | 11.34 | 0.94  | 0.34954 |
| CLN8       | -0.09 | 7.74  | -0.94 | 0.34956 |
| EIF5AL1    | 0.09  | 7.38  | 0.94  | 0.34959 |
| AC016700.2 | 0.11  | 5.35  | 0.94  | 0.34961 |
| DOCK9      | -0.16 | 7.88  | -0.94 | 0.34962 |
| FANCM      | -0.08 | 5.48  | -0.94 | 0.34965 |
| AC098583.1 | 0.09  | 5.28  | 0.94  | 0.34965 |
| AC132938.4 | 0.09  | 5.29  | 0.94  | 0.34995 |

|            |       |       |       |         |
|------------|-------|-------|-------|---------|
| TMEM150A   | 0.08  | 7.78  | 0.94  | 0.35000 |
| GEMIN7     | 0.08  | 8.23  | 0.94  | 0.35012 |
| TMEM191A   | 0.10  | 5.82  | 0.94  | 0.35020 |
| AC100861.1 | 0.09  | 6.25  | 0.94  | 0.35020 |
| MYADM      | -0.12 | 12.42 | -0.94 | 0.35023 |
| DYNC1I2P1  | -0.09 | 6.04  | -0.94 | 0.35027 |
| ERI1       | -0.09 | 6.98  | -0.94 | 0.35032 |
| EMC2       | -0.09 | 6.99  | -0.94 | 0.35035 |
| MACO1      | -0.09 | 8.36  | -0.94 | 0.35037 |
| ORMDL2     | 0.09  | 8.66  | 0.94  | 0.35040 |
| POLR3A     | 0.06  | 8.45  | 0.94  | 0.35060 |
| SEC14L1P1  | -0.12 | 6.21  | -0.94 | 0.35061 |
| NOD1       | -0.07 | 8.36  | -0.94 | 0.35076 |
| KMT2E      | -0.08 | 10.35 | -0.94 | 0.35079 |
| BTF3P5     | 0.09  | 5.50  | 0.94  | 0.35088 |
| BLMH       | 0.07  | 8.63  | 0.94  | 0.35095 |
| SMC4       | 0.13  | 8.76  | 0.94  | 0.35101 |
| HNRNPC     | -0.05 | 12.23 | -0.94 | 0.35111 |
| SEC14L4    | 0.14  | 5.09  | 0.94  | 0.35112 |
| RPL5P11    | -0.11 | 5.06  | -0.94 | 0.35113 |
| GIMAP7     | 0.09  | 11.18 | 0.94  | 0.35116 |
| PRKCB      | -0.07 | 11.80 | -0.94 | 0.35146 |
| ADCY10P1   | -0.13 | 6.67  | -0.94 | 0.35152 |
| SDAD1      | -0.07 | 8.42  | -0.94 | 0.35161 |
| AL445189.2 | 0.11  | 5.44  | 0.94  | 0.35180 |
| LINC00528  | -0.11 | 7.89  | -0.94 | 0.35180 |
| PCDH12     | -0.10 | 5.62  | -0.94 | 0.35185 |
| PRMT2      | 0.06  | 11.26 | 0.94  | 0.35194 |
| CPNE2      | 0.10  | 9.18  | 0.94  | 0.35197 |
| MAN1C1     | 0.11  | 8.53  | 0.94  | 0.35205 |
| THTPA      | 0.10  | 6.26  | 0.94  | 0.35222 |
| METTL6     | 0.07  | 6.50  | 0.94  | 0.35227 |
| LRRC20     | 0.09  | 6.55  | 0.94  | 0.35242 |
| GBF1       | -0.05 | 10.47 | -0.94 | 0.35261 |
| ARID3B     | -0.08 | 9.28  | -0.94 | 0.35274 |
| ARL11      | -0.11 | 8.69  | -0.94 | 0.35280 |
| BTLA       | 0.12  | 6.85  | 0.94  | 0.35303 |
| EHHADH     | -0.11 | 5.02  | -0.94 | 0.35305 |
| GTF2F2     | -0.07 | 7.35  | -0.94 | 0.35309 |
| LILRP2     | -0.12 | 5.71  | -0.94 | 0.35316 |
| AC009961.4 | -0.14 | 5.43  | -0.94 | 0.35319 |
| NIT1       | -0.06 | 8.83  | -0.94 | 0.35320 |
| ALKBH5     | 0.06  | 10.38 | 0.94  | 0.35320 |
| HTRA2      | 0.06  | 9.06  | 0.94  | 0.35323 |
| CBX3P9     | -0.10 | 5.26  | -0.94 | 0.35329 |
| MLLT11     | -0.09 | 5.89  | -0.94 | 0.35339 |
| IQSEC1     | -0.09 | 12.34 | -0.94 | 0.35379 |
| AC021016.2 | -0.10 | 7.36  | -0.94 | 0.35401 |
| AL031587.5 | 0.10  | 6.50  | 0.94  | 0.35404 |
| KLHL24     | -0.08 | 8.22  | -0.93 | 0.35431 |

|            |       |       |       |         |
|------------|-------|-------|-------|---------|
| IGKV3D-11  | 0.16  | 5.62  | 0.93  | 0.35432 |
| HACD2      | -0.08 | 7.58  | -0.93 | 0.35446 |
| CDK20      | 0.10  | 5.79  | 0.93  | 0.35463 |
| ZBTB48     | 0.07  | 9.52  | 0.93  | 0.35465 |
| HLA-DOA    | 0.13  | 9.63  | 0.93  | 0.35485 |
| PIK3CA     | -0.08 | 7.78  | -0.93 | 0.35498 |
| ZDHHHC11   | -0.12 | 5.14  | -0.93 | 0.35511 |
| LINC00996  | -0.14 | 5.23  | -0.93 | 0.35512 |
| KCNMB4     | 0.11  | 5.73  | 0.93  | 0.35514 |
| CCDC58     | 0.09  | 5.70  | 0.93  | 0.35516 |
| AC064836.3 | 0.11  | 5.06  | 0.93  | 0.35530 |
| NARS2      | 0.08  | 6.53  | 0.93  | 0.35535 |
| RUSC1      | 0.09  | 8.08  | 0.93  | 0.35553 |
| ZNF26      | -0.08 | 7.06  | -0.93 | 0.35579 |
| PLEKHG5    | 0.15  | 6.09  | 0.93  | 0.35580 |
| MARCHF3    | 0.13  | 6.20  | 0.93  | 0.35580 |
| TRAV9-2    | 0.10  | 6.60  | 0.93  | 0.35598 |
| MFN2       | -0.12 | 10.54 | -0.93 | 0.35600 |
| DNAJA1P3   | -0.12 | 5.54  | -0.93 | 0.35602 |
| PTCH2      | -0.10 | 5.20  | -0.93 | 0.35604 |
| TBC1D5     | -0.07 | 9.08  | -0.93 | 0.35608 |
| KIR3DX1    | 0.13  | 5.23  | 0.93  | 0.35610 |
| NDRG2      | 0.11  | 8.11  | 0.93  | 0.35612 |
| SIK2       | -0.06 | 7.95  | -0.93 | 0.35614 |
| TXLNGY     | -0.36 | 6.73  | -0.93 | 0.35623 |
| AC093388.1 | -0.11 | 4.99  | -0.93 | 0.35634 |
| EIF5P1     | -0.09 | 5.06  | -0.93 | 0.35635 |
| MAGI3      | -0.12 | 5.09  | -0.93 | 0.35644 |
| TIAL1      | -0.05 | 9.55  | -0.93 | 0.35655 |
| SPOP       | 0.05  | 9.97  | 0.93  | 0.35664 |
| F13A1      | -0.16 | 10.35 | -0.93 | 0.35688 |
| MYO1G      | 0.07  | 12.65 | 0.93  | 0.35691 |
| PLAUR      | -0.13 | 10.76 | -0.93 | 0.35692 |
| AC113398.1 | 0.15  | 8.70  | 0.93  | 0.35725 |
| NPM1       | 0.08  | 11.14 | 0.93  | 0.35727 |
| SUPT4H1    | -0.09 | 5.91  | -0.93 | 0.35735 |
| LINC00239  | 0.08  | 5.09  | 0.93  | 0.35747 |
| AC073869.1 | -0.09 | 8.33  | -0.93 | 0.35756 |
| PIN4       | 0.09  | 7.19  | 0.93  | 0.35765 |
| HNRNPUP1   | -0.11 | 6.19  | -0.93 | 0.35778 |
| AL021707.8 | -0.12 | 5.67  | -0.93 | 0.35784 |
| ABLIM3     | 0.16  | 7.83  | 0.93  | 0.35793 |
| RAB5C      | 0.09  | 10.66 | 0.93  | 0.35806 |
| METTTL1    | 0.08  | 5.89  | 0.93  | 0.35807 |
| STAG3L5P   | -0.13 | 6.24  | -0.93 | 0.35812 |
| FAM241A    | -0.10 | 6.22  | -0.93 | 0.35815 |
| NECAB3     | 0.10  | 6.80  | 0.93  | 0.35816 |
| TSPAN15    | 0.14  | 5.71  | 0.93  | 0.35888 |
| GPC2       | 0.13  | 5.60  | 0.93  | 0.35890 |
| H3P6       | -0.13 | 9.26  | -0.93 | 0.35896 |

|             |       |       |       |         |
|-------------|-------|-------|-------|---------|
| ZBED5-AS1   | 0.08  | 6.67  | 0.93  | 0.35898 |
| WDCP        | -0.08 | 7.04  | -0.92 | 0.35927 |
| DIAPH2      | -0.08 | 7.46  | -0.92 | 0.35934 |
| AC011379.2  | 0.10  | 4.97  | 0.92  | 0.35941 |
| NUTF2P2     | 0.09  | 5.38  | 0.92  | 0.35943 |
| TANGO6      | -0.07 | 7.82  | -0.92 | 0.35946 |
| RPL12P6     | 0.11  | 5.64  | 0.92  | 0.35946 |
| AGAP7P      | -0.18 | 7.40  | -0.92 | 0.35951 |
| CFAP45      | -0.15 | 6.78  | -0.92 | 0.35960 |
| CDC40       | -0.08 | 7.68  | -0.92 | 0.35961 |
| PEG13       | 0.09  | 6.82  | 0.92  | 0.35965 |
| ABCC2       | -0.14 | 5.59  | -0.92 | 0.35970 |
| DERL3       | 0.18  | 7.19  | 0.92  | 0.35977 |
| ANKRD44-AS1 | 0.15  | 5.99  | 0.92  | 0.35979 |
| ITGAX       | -0.13 | 13.57 | -0.92 | 0.35981 |
| SLC35B4     | -0.07 | 6.99  | -0.92 | 0.35985 |
| UBAP1       | -0.11 | 10.43 | -0.92 | 0.36004 |
| HLA-DQA2    | -0.46 | 8.09  | -0.92 | 0.36011 |
| CD69        | -0.10 | 6.58  | -0.92 | 0.36022 |
| CHD8        | -0.05 | 10.50 | -0.92 | 0.36025 |
| PHF10       | -0.07 | 8.66  | -0.92 | 0.36034 |
| FBXO6       | -0.13 | 8.31  | -0.92 | 0.36048 |
| AC092279.1  | -0.11 | 5.81  | -0.92 | 0.36049 |
| CAMK2D      | -0.09 | 7.62  | -0.92 | 0.36049 |
| AL590064.1  | 0.12  | 5.20  | 0.92  | 0.36061 |
| MALINC1     | 0.10  | 4.99  | 0.92  | 0.36068 |
| FTCDNL1     | 0.10  | 5.00  | 0.92  | 0.36074 |
| TMEM18      | 0.07  | 8.29  | 0.92  | 0.36076 |
| AC106872.6  | 0.09  | 5.11  | 0.92  | 0.36082 |
| ANG         | -0.11 | 5.74  | -0.92 | 0.36086 |
| SLC25A4     | 0.09  | 6.56  | 0.92  | 0.36096 |
| CNKSR1      | 0.15  | 5.80  | 0.92  | 0.36102 |
| TAF4B       | -0.12 | 5.85  | -0.92 | 0.36113 |
| SSU72       | 0.07  | 11.39 | 0.92  | 0.36118 |
| SYNJ2       | -0.09 | 7.17  | -0.92 | 0.36149 |
| PAIP2       | -0.07 | 10.43 | -0.92 | 0.36162 |
| SRSF9       | 0.06  | 10.32 | 0.92  | 0.36163 |
| TRIM47      | 0.11  | 6.86  | 0.92  | 0.36178 |
| C11orf74    | -0.10 | 5.18  | -0.92 | 0.36183 |
| PLAU        | -0.13 | 5.25  | -0.92 | 0.36192 |
| ABRAXAS2    | -0.07 | 7.50  | -0.92 | 0.36193 |
| CCDC78      | 0.12  | 5.35  | 0.92  | 0.36206 |
| NPM1P39     | -0.11 | 6.13  | -0.92 | 0.36207 |
| TMEM272     | -0.19 | 6.07  | -0.92 | 0.36215 |
| FAF2        | -0.06 | 8.70  | -0.92 | 0.36220 |
| AC000123.3  | -0.11 | 5.07  | -0.92 | 0.36224 |
| PPIF        | -0.08 | 10.20 | -0.92 | 0.36236 |
| AL592293.2  | -0.09 | 5.28  | -0.92 | 0.36237 |
| KIAA2026    | 0.11  | 8.67  | 0.92  | 0.36249 |
| MTF2        | -0.07 | 7.60  | -0.92 | 0.36252 |



|              |       |       |       |         |
|--------------|-------|-------|-------|---------|
| IGHV2-70     | 0.16  | 5.47  | 0.92  | 0.36257 |
| ASB2         | 0.10  | 6.70  | 0.92  | 0.36258 |
| SF3B3        | 0.06  | 11.07 | 0.92  | 0.36259 |
| HNRNPA1P8    | -0.08 | 5.39  | -0.92 | 0.36281 |
| CYSLTR1      | -0.11 | 7.24  | -0.92 | 0.36285 |
| ZNF846       | 0.09  | 5.62  | 0.92  | 0.36286 |
| TMEM65       | -0.08 | 7.35  | -0.92 | 0.36290 |
| ECI2         | 0.08  | 8.05  | 0.92  | 0.36290 |
| RNF20        | -0.06 | 9.21  | -0.92 | 0.36290 |
| SNRPGP2      | -0.08 | 5.08  | -0.92 | 0.36291 |
| GK5          | -0.11 | 7.31  | -0.92 | 0.36298 |
| HNRNPR       | -0.07 | 10.28 | -0.92 | 0.36301 |
| RBM26        | 0.09  | 8.78  | 0.92  | 0.36330 |
| TMCO3        | -0.10 | 8.92  | -0.92 | 0.36341 |
| ANKMY1       | 0.06  | 8.23  | 0.92  | 0.36351 |
| PHLPP2       | -0.10 | 6.54  | -0.92 | 0.36352 |
| RPL30P7      | 0.09  | 5.73  | 0.92  | 0.36357 |
| PABPC1L      | -0.15 | 8.61  | -0.92 | 0.36363 |
| ERCC6L2      | -0.07 | 7.53  | -0.92 | 0.36370 |
| BAIAP2L2     | 0.10  | 5.44  | 0.92  | 0.36373 |
| ADAM23       | -0.14 | 5.45  | -0.92 | 0.36379 |
| NPIP84       | -0.14 | 10.66 | -0.92 | 0.36382 |
| TTN          | -0.16 | 5.98  | -0.92 | 0.36386 |
| LINC01513    | -0.13 | 5.12  | -0.92 | 0.36402 |
| HPCAL1       | 0.08  | 10.53 | 0.92  | 0.36414 |
| DLG5         | -0.13 | 6.95  | -0.92 | 0.36423 |
| SAV1         | -0.09 | 7.25  | -0.92 | 0.36425 |
| PDE8A        | -0.11 | 7.20  | -0.92 | 0.36426 |
| CMAS         | 0.07  | 6.93  | 0.92  | 0.36429 |
| MKNK2        | 0.08  | 12.25 | 0.92  | 0.36430 |
| GBP3         | -0.18 | 7.42  | -0.92 | 0.36435 |
| MTRNR2L12    | 0.13  | 7.72  | 0.92  | 0.36442 |
| CCDC9B       | -0.11 | 6.15  | -0.91 | 0.36446 |
| BCORL1       | -0.08 | 8.61  | -0.91 | 0.36447 |
| GNG11        | 0.17  | 8.28  | 0.91  | 0.36448 |
| RPL41        | 0.11  | 11.91 | 0.91  | 0.36458 |
| EPS8L1       | 0.10  | 5.57  | 0.91  | 0.36469 |
| PDGFA        | 0.13  | 5.68  | 0.91  | 0.36479 |
| PPFIBP2      | -0.09 | 8.33  | -0.91 | 0.36484 |
| ORAI2        | 0.10  | 11.33 | 0.91  | 0.36485 |
| AC114402.1   | 0.08  | 4.98  | 0.91  | 0.36490 |
| SIRT7        | 0.07  | 10.35 | 0.91  | 0.36491 |
| STING1       | 0.08  | 11.20 | 0.91  | 0.36498 |
| HSH2D        | -0.12 | 11.52 | -0.91 | 0.36501 |
| NEDD8        | 0.10  | 9.38  | 0.91  | 0.36507 |
| KDM5C        | -0.08 | 10.79 | -0.91 | 0.36514 |
| C21orf62-AS1 | 0.10  | 5.53  | 0.91  | 0.36527 |
| RAB3D        | -0.11 | 10.88 | -0.91 | 0.36544 |
| CXorf40A     | 0.08  | 7.92  | 0.91  | 0.36559 |
| AJ003147.3   | 0.15  | 6.16  | 0.91  | 0.36560 |

|            |       |       |       |         |
|------------|-------|-------|-------|---------|
| CLEC2D     | -0.09 | 9.37  | -0.91 | 0.36574 |
| LINC00667  | -0.09 | 7.97  | -0.91 | 0.36581 |
| TAZ        | 0.09  | 9.71  | 0.91  | 0.36585 |
| CZIB       | 0.06  | 8.92  | 0.91  | 0.36594 |
| PPP1R8     | -0.05 | 8.77  | -0.91 | 0.36599 |
| DHX37      | 0.07  | 8.98  | 0.91  | 0.36619 |
| ABI3       | 0.12  | 10.52 | 0.91  | 0.36623 |
| CDC5L      | -0.06 | 8.75  | -0.91 | 0.36628 |
| ARHGAP27   | -0.10 | 12.07 | -0.91 | 0.36638 |
| SPTB       | 0.23  | 8.71  | 0.91  | 0.36642 |
| GYPE       | 0.15  | 5.05  | 0.91  | 0.36647 |
| BOLA3      | -0.10 | 6.31  | -0.91 | 0.36661 |
| PEBP1P2    | 0.10  | 5.16  | 0.91  | 0.36675 |
| ARHGEF40   | -0.17 | 10.73 | -0.91 | 0.36679 |
| RPA2P2     | -0.09 | 5.19  | -0.91 | 0.36682 |
| AC130371.2 | 0.10  | 5.29  | 0.91  | 0.36684 |
| FGD3       | 0.08  | 13.06 | 0.91  | 0.36688 |
| CYTH1      | -0.06 | 12.01 | -0.91 | 0.36691 |
| PHF6       | -0.09 | 6.31  | -0.91 | 0.36696 |
| SEMA4C     | 0.08  | 8.88  | 0.91  | 0.36696 |
| RPL39P3    | 0.14  | 8.03  | 0.91  | 0.36704 |
| P2RY2      | -0.12 | 6.48  | -0.91 | 0.36706 |
| CCDC18     | 0.09  | 6.44  | 0.91  | 0.36717 |
| TPCN2      | -0.10 | 8.30  | -0.91 | 0.36722 |
| MORF4L1P1  | -0.10 | 7.94  | -0.91 | 0.36763 |
| RGS12      | 0.08  | 7.48  | 0.91  | 0.36764 |
| TNFRSF10C  | -0.16 | 11.93 | -0.91 | 0.36770 |
| BRSK1      | 0.09  | 5.42  | 0.91  | 0.36783 |
| MTX3       | -0.08 | 6.61  | -0.91 | 0.36793 |
| DENND2D    | 0.07  | 11.03 | 0.91  | 0.36794 |
| KIR3DL2    | 0.16  | 6.93  | 0.91  | 0.36808 |
| FFAR2      | -0.17 | 12.11 | -0.91 | 0.36811 |
| C5         | -0.10 | 5.52  | -0.91 | 0.36816 |
| MRPL10     | 0.07  | 9.53  | 0.91  | 0.36827 |
| DVL3       | -0.07 | 9.60  | -0.91 | 0.36830 |
| GYPC       | 0.19  | 13.44 | 0.91  | 0.36833 |
| VPS41      | -0.05 | 9.10  | -0.91 | 0.36833 |
| EHD4       | -0.07 | 9.12  | -0.91 | 0.36834 |
| LINC00494  | 0.11  | 5.62  | 0.91  | 0.36836 |
| ITGA9-AS1  | 0.11  | 5.32  | 0.91  | 0.36839 |
| AL049872.1 | 0.07  | 5.53  | 0.91  | 0.36845 |
| HARBI1     | 0.09  | 6.22  | 0.91  | 0.36848 |
| NOA1       | 0.06  | 8.52  | 0.91  | 0.36860 |
| NR1D2      | -0.10 | 7.50  | -0.91 | 0.36860 |
| PEX6       | 0.13  | 9.54  | 0.91  | 0.36863 |
| AC009093.6 | 0.10  | 5.02  | 0.91  | 0.36865 |
| AC016831.1 | -0.11 | 5.10  | -0.91 | 0.36881 |
| RPS4XP6    | 0.14  | 6.30  | 0.91  | 0.36885 |
| RETN       | -0.17 | 7.03  | -0.91 | 0.36889 |
| AC064799.1 | 0.13  | 7.72  | 0.91  | 0.36895 |

|            |       |       |       |         |
|------------|-------|-------|-------|---------|
| SPARC      | 0.16  | 10.91 | 0.91  | 0.36953 |
| RPARP-AS1  | 0.08  | 7.91  | 0.91  | 0.36954 |
| C9orf40    | 0.09  | 6.18  | 0.91  | 0.36955 |
| ZDHHHC5    | -0.05 | 10.32 | -0.90 | 0.36976 |
| ATF7IP2    | 0.09  | 6.69  | 0.90  | 0.36981 |
| YBX1       | 0.09  | 13.52 | 0.90  | 0.36981 |
| AKAP1      | 0.08  | 8.03  | 0.90  | 0.36998 |
| GNAO1      | 0.14  | 7.09  | 0.90  | 0.37003 |
| AC003072.1 | 0.08  | 6.58  | 0.90  | 0.37004 |
| CNOT9      | -0.05 | 8.75  | -0.90 | 0.37013 |
| HEXIM1     | -0.07 | 9.38  | -0.90 | 0.37031 |
| MTMR9      | -0.07 | 6.99  | -0.90 | 0.37032 |
| MORN2      | 0.11  | 5.07  | 0.90  | 0.37041 |
| CDK5RAP3   | -0.15 | 8.30  | -0.90 | 0.37044 |
| AMPD2      | -0.11 | 12.00 | -0.90 | 0.37050 |
| TRBV10-2   | 0.15  | 5.36  | 0.90  | 0.37063 |
| RPS4XP3    | 0.10  | 5.75  | 0.90  | 0.37066 |
| DHX30      | 0.06  | 10.13 | 0.90  | 0.37072 |
| BID        | -0.08 | 10.22 | -0.90 | 0.37077 |
| ZNF335     | 0.06  | 10.06 | 0.90  | 0.37082 |
| IGLV1-47   | 0.20  | 7.18  | 0.90  | 0.37101 |
| ALKBH8     | -0.10 | 6.19  | -0.90 | 0.37104 |
| AL121753.2 | 0.07  | 6.49  | 0.90  | 0.37108 |
| PPP1R3F    | 0.09  | 6.82  | 0.90  | 0.37129 |
| ABCC13     | 0.19  | 5.86  | 0.90  | 0.37137 |
| BSCL2      | 0.08  | 6.17  | 0.90  | 0.37143 |
| TMEM99     | 0.09  | 6.13  | 0.90  | 0.37149 |
| CAPN15     | 0.08  | 9.46  | 0.90  | 0.37165 |
| FLVCR1     | 0.11  | 7.06  | 0.90  | 0.37166 |
| RPL34P31   | 0.12  | 6.36  | 0.90  | 0.37169 |
| EPB42      | 0.24  | 8.95  | 0.90  | 0.37181 |
| SLC5A6     | 0.06  | 8.09  | 0.90  | 0.37197 |
| FLCN       | -0.09 | 8.96  | -0.90 | 0.37200 |
| B3GLCT     | -0.08 | 6.14  | -0.90 | 0.37212 |
| ZNF684     | 0.10  | 5.32  | 0.90  | 0.37217 |
| TCEA1P2    | -0.13 | 5.23  | -0.90 | 0.37238 |
| IGLV8-61   | 0.22  | 6.44  | 0.90  | 0.37243 |
| CIR1       | 0.12  | 10.40 | 0.90  | 0.37245 |
| ESRRA      | 0.06  | 9.21  | 0.90  | 0.37252 |
| NAA50      | -0.07 | 9.13  | -0.90 | 0.37283 |
| GNA12      | 0.13  | 9.92  | 0.90  | 0.37286 |
| RABGAP1    | -0.06 | 8.71  | -0.90 | 0.37304 |
| PHOSPHO1   | 0.20  | 12.52 | 0.90  | 0.37314 |
| DCAF10     | 0.10  | 8.27  | 0.90  | 0.37366 |
| KCNJ14     | 0.11  | 5.31  | 0.90  | 0.37368 |
| TAMM41     | -0.09 | 6.83  | -0.90 | 0.37375 |
| EEF1A1     | 0.09  | 16.20 | 0.90  | 0.37379 |
| IQSEC2     | -0.11 | 7.69  | -0.90 | 0.37380 |
| MICA       | -0.09 | 8.15  | -0.90 | 0.37385 |
| U2AF1L5    | 0.10  | 6.56  | 0.90  | 0.37387 |

|             |       |       |       |         |
|-------------|-------|-------|-------|---------|
| TCAP        | 0.11  | 5.19  | 0.90  | 0.37391 |
| KIAA0319L   | -0.12 | 11.17 | -0.90 | 0.37403 |
| AC011498.7  | 0.10  | 5.53  | 0.90  | 0.37415 |
| S100A13     | 0.10  | 5.60  | 0.90  | 0.37422 |
| ZNF100      | -0.09 | 5.92  | -0.90 | 0.37425 |
| TMEM241     | -0.09 | 5.73  | -0.90 | 0.37426 |
| FKBP5       | -0.19 | 10.36 | -0.90 | 0.37433 |
| SGO2        | -0.10 | 5.21  | -0.90 | 0.37435 |
| Z98886.1    | -0.13 | 5.67  | -0.90 | 0.37438 |
| PRDX1       | 0.10  | 10.01 | 0.90  | 0.37442 |
| SPACA9      | 0.09  | 5.81  | 0.90  | 0.37449 |
| AC008725.1  | 0.11  | 5.52  | 0.90  | 0.37450 |
| GEMIN4      | 0.07  | 8.37  | 0.90  | 0.37471 |
| EIF1P5      | 0.10  | 6.73  | 0.90  | 0.37475 |
| C16orf87    | -0.08 | 5.76  | -0.90 | 0.37477 |
| FP565260.1  | -0.12 | 6.76  | -0.90 | 0.37479 |
| MPHOSPH6    | 0.07  | 6.76  | 0.89  | 0.37503 |
| C1RL-AS1    | -0.12 | 6.59  | -0.89 | 0.37525 |
| LINC02724   | -0.11 | 5.81  | -0.89 | 0.37526 |
| AJM1        | 0.12  | 7.01  | 0.89  | 0.37529 |
| CDYL2       | -0.09 | 6.55  | -0.89 | 0.37537 |
| STS         | -0.10 | 6.88  | -0.89 | 0.37542 |
| WSB2        | -0.08 | 9.09  | -0.89 | 0.37549 |
| TIFAB       | -0.11 | 5.26  | -0.89 | 0.37553 |
| DMTN        | 0.23  | 12.94 | 0.89  | 0.37563 |
| MIER2       | 0.08  | 8.25  | 0.89  | 0.37584 |
| MREG        | -0.09 | 5.62  | -0.89 | 0.37607 |
| SCARF1      | -0.17 | 8.23  | -0.89 | 0.37644 |
| CXCR1       | -0.17 | 13.28 | -0.89 | 0.37658 |
| EMILIN1     | 0.10  | 5.22  | 0.89  | 0.37670 |
| VAMP5       | 0.11  | 9.12  | 0.89  | 0.37675 |
| HSP90AA1    | 0.09  | 12.14 | 0.89  | 0.37677 |
| EMC1        | -0.06 | 8.66  | -0.89 | 0.37689 |
| XCR1        | -0.12 | 5.17  | -0.89 | 0.37693 |
| STK24       | -0.05 | 10.69 | -0.89 | 0.37702 |
| ADNP2       | -0.07 | 7.63  | -0.89 | 0.37709 |
| LINC02482   | 0.12  | 5.41  | 0.89  | 0.37715 |
| ARIH1       | -0.06 | 9.01  | -0.89 | 0.37720 |
| GDF7        | 0.14  | 5.22  | 0.89  | 0.37762 |
| MARCKS      | -0.13 | 9.76  | -0.89 | 0.37762 |
| CDHR2       | -0.10 | 5.01  | -0.89 | 0.37765 |
| KLHL17      | 0.12  | 7.36  | 0.89  | 0.37769 |
| NCOA1       | -0.09 | 10.47 | -0.89 | 0.37770 |
| BLVRA       | -0.12 | 8.79  | -0.89 | 0.37793 |
| TBC1D9      | -0.11 | 8.23  | -0.89 | 0.37815 |
| ARSA        | 0.09  | 10.22 | 0.89  | 0.37825 |
| CENPF       | -0.10 | 5.78  | -0.89 | 0.37832 |
| SNHG14      | 0.10  | 7.47  | 0.89  | 0.37834 |
| IGHV3-33    | 0.21  | 7.77  | 0.89  | 0.37844 |
| RNASEH1-AS1 | 0.08  | 5.97  | 0.89  | 0.37859 |

|            |       |       |       |         |
|------------|-------|-------|-------|---------|
| FKBP1C     | -0.09 | 7.07  | -0.89 | 0.37861 |
| AC016596.3 | 0.14  | 6.46  | 0.89  | 0.37873 |
| G3BP1      | -0.05 | 9.96  | -0.89 | 0.37875 |
| ECHDC2     | 0.13  | 9.01  | 0.89  | 0.37882 |
| PSMB3      | 0.10  | 11.19 | 0.89  | 0.37887 |
| SLC7A8     | 0.19  | 6.00  | 0.89  | 0.37894 |
| ZER1       | 0.10  | 11.05 | 0.89  | 0.37895 |
| ZSCAN16    | -0.07 | 6.96  | -0.89 | 0.37896 |
| CBWD2      | -0.10 | 6.41  | -0.89 | 0.37897 |
| RETREG2    | 0.08  | 11.17 | 0.89  | 0.37900 |
| NPRL2      | 0.07  | 9.32  | 0.89  | 0.37901 |
| NDC80      | -0.09 | 5.91  | -0.89 | 0.37902 |
| SPG21      | -0.06 | 10.22 | -0.89 | 0.37908 |
| DLEU7      | -0.13 | 5.49  | -0.89 | 0.37909 |
| KLHL25     | 0.09  | 6.75  | 0.89  | 0.37916 |
| CCNDBP1    | -0.09 | 10.66 | -0.89 | 0.37917 |
| AGPAT4     | -0.10 | 7.83  | -0.89 | 0.37946 |
| RPH3A      | 0.20  | 7.94  | 0.89  | 0.37966 |
| UBQLNL     | -0.13 | 5.09  | -0.89 | 0.37984 |
| AC068205.2 | 0.11  | 5.10  | 0.89  | 0.37996 |
| CAMKMT     | 0.09  | 5.97  | 0.89  | 0.37999 |
| UBA6-AS1   | 0.08  | 7.01  | 0.89  | 0.38003 |
| CDC27      | -0.07 | 7.54  | -0.88 | 0.38026 |
| TPT1-AS1   | 0.09  | 8.20  | 0.88  | 0.38029 |
| CHIC2      | -0.11 | 7.69  | -0.88 | 0.38043 |
| PAXBP1-AS1 | 0.09  | 5.54  | 0.88  | 0.38045 |
| TNFRSF12A  | 0.10  | 5.99  | 0.88  | 0.38047 |
| ACVR2B     | 0.10  | 6.17  | 0.88  | 0.38048 |
| DMPK       | 0.10  | 8.29  | 0.88  | 0.38054 |
| NDEL1      | -0.11 | 10.58 | -0.88 | 0.38060 |
| BEND3      | -0.09 | 5.28  | -0.88 | 0.38069 |
| NRL        | 0.07  | 5.48  | 0.88  | 0.38080 |
| LINC01560  | -0.08 | 5.19  | -0.88 | 0.38092 |
| KIAA0586   | -0.08 | 7.40  | -0.88 | 0.38099 |
| SOWAHD     | 0.09  | 7.69  | 0.88  | 0.38107 |
| LRP3       | 0.12  | 7.30  | 0.88  | 0.38122 |
| ZNF528     | -0.07 | 6.67  | -0.88 | 0.38125 |
| RPS6KA4    | 0.09  | 10.16 | 0.88  | 0.38134 |
| ZNF490     | 0.07  | 5.86  | 0.88  | 0.38157 |
| EFEMP2     | -0.15 | 6.78  | -0.88 | 0.38158 |
| AC090686.1 | 0.11  | 6.34  | 0.88  | 0.38162 |
| AC092299.1 | 0.13  | 6.08  | 0.88  | 0.38171 |
| TIGD2      | -0.09 | 5.79  | -0.88 | 0.38176 |
| KRIT1      | -0.07 | 6.54  | -0.88 | 0.38182 |
| AC008677.1 | 0.10  | 6.11  | 0.88  | 0.38193 |
| CDK11A     | 0.11  | 6.87  | 0.88  | 0.38193 |
| LIN9       | -0.08 | 5.07  | -0.88 | 0.38209 |
| HPCAL4     | 0.14  | 6.45  | 0.88  | 0.38227 |
| ALDH18A1   | -0.06 | 8.30  | -0.88 | 0.38236 |
| SPDL1      | -0.09 | 6.11  | -0.88 | 0.38238 |

|             |       |       |       |         |
|-------------|-------|-------|-------|---------|
| WDR70       | 0.06  | 8.13  | 0.88  | 0.38239 |
| SYNRG       | -0.06 | 9.99  | -0.88 | 0.38248 |
| LEMD2       | 0.05  | 9.97  | 0.88  | 0.38253 |
| FUBP3       | -0.14 | 7.56  | -0.88 | 0.38260 |
| TOX2        | 0.13  | 5.74  | 0.88  | 0.38276 |
| HEATR1      | -0.09 | 8.09  | -0.88 | 0.38292 |
| CYTIP       | -0.06 | 10.78 | -0.88 | 0.38301 |
| RPL12P15    | 0.07  | 5.23  | 0.88  | 0.38314 |
| COX7A2      | 0.08  | 9.45  | 0.88  | 0.38321 |
| UPF3AP2     | 0.08  | 5.19  | 0.88  | 0.38323 |
| BASP1-AS1   | -0.14 | 5.21  | -0.88 | 0.38325 |
| SLC7A6      | -0.10 | 9.45  | -0.88 | 0.38337 |
| AC105250.1  | -0.12 | 5.93  | -0.88 | 0.38337 |
| GORASP2     | 0.06  | 9.46  | 0.88  | 0.38337 |
| PSMA2       | 0.08  | 6.37  | 0.88  | 0.38354 |
| DDX56       | 0.07  | 9.92  | 0.88  | 0.38375 |
| IPP         | 0.13  | 6.12  | 0.88  | 0.38382 |
| AKTIP       | -0.08 | 8.06  | -0.88 | 0.38420 |
| IGKV1-12    | 0.17  | 5.89  | 0.88  | 0.38427 |
| LINC01624   | 0.12  | 5.47  | 0.88  | 0.38428 |
| IK          | 0.06  | 11.06 | 0.88  | 0.38429 |
| BTNL8       | -0.21 | 8.13  | -0.88 | 0.38465 |
| AC067942.1  | 0.16  | 7.23  | 0.88  | 0.38489 |
| TATDN1      | 0.09  | 6.34  | 0.88  | 0.38489 |
| YWHAEP1     | 0.09  | 5.08  | 0.88  | 0.38494 |
| AC109449.1  | 0.12  | 5.48  | 0.88  | 0.38496 |
| FAM24B      | -0.11 | 5.48  | -0.88 | 0.38503 |
| AC005840.1  | 0.08  | 5.51  | 0.88  | 0.38512 |
| UBE2Z       | -0.05 | 9.94  | -0.88 | 0.38533 |
| CCPG1       | -0.11 | 7.83  | -0.88 | 0.38553 |
| CEP44       | -0.08 | 6.21  | -0.88 | 0.38554 |
| CUBN        | -0.10 | 5.99  | -0.87 | 0.38562 |
| LILRB2      | -0.10 | 12.14 | -0.87 | 0.38583 |
| GABARAP     | 0.10  | 8.26  | 0.87  | 0.38584 |
| MAFF        | -0.09 | 6.80  | -0.87 | 0.38625 |
| GRSF1       | -0.06 | 8.89  | -0.87 | 0.38630 |
| TMEM254-AS1 | 0.11  | 5.03  | 0.87  | 0.38640 |
| RFC1        | -0.06 | 8.66  | -0.87 | 0.38658 |
| GALNT10     | -0.06 | 9.59  | -0.87 | 0.38659 |
| OIP5-AS1    | 0.08  | 9.46  | 0.87  | 0.38665 |
| AC091230.1  | 0.08  | 9.51  | 0.87  | 0.38668 |
| AC008467.1  | -0.12 | 5.68  | -0.87 | 0.38672 |
| TOB1        | -0.10 | 8.70  | -0.87 | 0.38683 |
| TRMT5       | 0.08  | 6.40  | 0.87  | 0.38683 |
| HAUS3       | -0.08 | 6.74  | -0.87 | 0.38700 |
| AC016831.6  | -0.12 | 5.40  | -0.87 | 0.38715 |
| LRBA        | -0.06 | 8.64  | -0.87 | 0.38723 |
| ABCD2       | -0.11 | 6.01  | -0.87 | 0.38735 |
| PIK3R1      | -0.08 | 9.58  | -0.87 | 0.38736 |
| TSHZ1       | -0.10 | 8.27  | -0.87 | 0.38742 |

|            |       |       |       |         |
|------------|-------|-------|-------|---------|
| FANCL      | -0.09 | 5.40  | -0.87 | 0.38746 |
| LGALS3BP   | 0.15  | 9.66  | 0.87  | 0.38746 |
| PRMT9      | -0.09 | 5.94  | -0.87 | 0.38767 |
| GALM       | 0.10  | 8.99  | 0.87  | 0.38776 |
| AC099489.1 | -0.17 | 10.18 | -0.87 | 0.38795 |
| ZSWIM4     | 0.07  | 6.90  | 0.87  | 0.38796 |
| SLC25A30   | -0.08 | 6.98  | -0.87 | 0.38806 |
| METRNL     | 0.12  | 6.29  | 0.87  | 0.38810 |
| AP000346.2 | -0.10 | 5.59  | -0.87 | 0.38834 |
| GBAP1      | -0.10 | 6.50  | -0.87 | 0.38840 |
| UBE2T      | 0.10  | 5.24  | 0.87  | 0.38841 |
| NMB        | 0.10  | 5.71  | 0.87  | 0.38844 |
| FOXO3B     | 0.09  | 5.68  | 0.87  | 0.38885 |
| LYAR       | 0.07  | 8.72  | 0.87  | 0.38889 |
| ZNF331     | 0.08  | 7.40  | 0.87  | 0.38941 |
| TRAV8-1    | 0.14  | 5.73  | 0.87  | 0.38945 |
| RPL17P36   | 0.10  | 6.35  | 0.87  | 0.38952 |
| RPAP3      | -0.06 | 8.00  | -0.87 | 0.38964 |
| TSPAN5     | 0.16  | 9.15  | 0.87  | 0.38985 |
| CFAP58     | -0.12 | 5.39  | -0.87 | 0.38988 |
| KIAA1143   | -0.08 | 7.32  | -0.87 | 0.39021 |
| ZDHHC21    | -0.08 | 6.01  | -0.87 | 0.39032 |
| KRTCAP3    | 0.11  | 5.94  | 0.87  | 0.39032 |
| PFN2       | -0.09 | 5.40  | -0.87 | 0.39050 |
| URB1-AS1   | 0.09  | 5.24  | 0.87  | 0.39053 |
| AC024995.1 | 0.10  | 5.06  | 0.87  | 0.39059 |
| MDH1       | 0.06  | 9.27  | 0.87  | 0.39076 |
| GNAZ       | 0.13  | 8.25  | 0.87  | 0.39079 |
| GMDS-DT    | 0.07  | 6.24  | 0.87  | 0.39102 |
| NRDC       | -0.08 | 10.99 | -0.86 | 0.39106 |
| PKIA       | -0.11 | 6.57  | -0.86 | 0.39110 |
| EXOC5      | -0.08 | 7.60  | -0.86 | 0.39127 |
| RASGRP4    | -0.12 | 11.87 | -0.86 | 0.39144 |
| AL157713.1 | -0.09 | 5.31  | -0.86 | 0.39145 |
| AC110994.3 | 0.12  | 6.90  | 0.86  | 0.39153 |
| ARPC1A     | 0.08  | 7.26  | 0.86  | 0.39161 |
| GPS2       | 0.10  | 5.73  | 0.86  | 0.39182 |
| ZBP1       | -0.14 | 9.69  | -0.86 | 0.39183 |
| AC005165.2 | 0.13  | 6.84  | 0.86  | 0.39188 |
| AC009948.1 | 0.10  | 5.61  | 0.86  | 0.39189 |
| AL358472.1 | 0.12  | 6.29  | 0.86  | 0.39190 |
| ZNF568     | -0.08 | 6.17  | -0.86 | 0.39191 |
| UBXN10     | 0.11  | 5.81  | 0.86  | 0.39195 |
| TCN1       | -0.16 | 6.89  | -0.86 | 0.39196 |
| AC132192.2 | -0.10 | 5.36  | -0.86 | 0.39203 |
| TMEM237    | -0.08 | 5.24  | -0.86 | 0.39208 |
| AL357055.1 | 0.09  | 5.80  | 0.86  | 0.39214 |
| SIAE       | -0.09 | 6.86  | -0.86 | 0.39214 |
| NPIPP1     | 0.10  | 6.73  | 0.86  | 0.39224 |
| C10orf105  | -0.15 | 7.91  | -0.86 | 0.39230 |

|            |       |       |       |         |
|------------|-------|-------|-------|---------|
| PRKCQ      | 0.08  | 9.21  | 0.86  | 0.39243 |
| SELENOWP1  | 0.11  | 5.10  | 0.86  | 0.39250 |
| IGHJ2      | 0.18  | 5.48  | 0.86  | 0.39250 |
| TPGS2      | 0.14  | 9.53  | 0.86  | 0.39251 |
| RP9P       | 0.09  | 5.27  | 0.86  | 0.39254 |
| UBE2Q2     | -0.08 | 8.04  | -0.86 | 0.39257 |
| PPP2R3B    | 0.10  | 8.13  | 0.86  | 0.39265 |
| EIF4A1P2   | 0.11  | 6.77  | 0.86  | 0.39282 |
| KCNK5      | -0.08 | 4.97  | -0.86 | 0.39285 |
| SNRPEP2    | 0.10  | 5.14  | 0.86  | 0.39289 |
| PIP4K2B    | 0.04  | 10.03 | 0.86  | 0.39292 |
| FAM98B     | 0.08  | 7.10  | 0.86  | 0.39292 |
| DNM1       | 0.12  | 5.85  | 0.86  | 0.39307 |
| AL136038.7 | 0.10  | 5.29  | 0.86  | 0.39364 |
| ZNF180     | -0.07 | 6.84  | -0.86 | 0.39366 |
| LINC01001  | -0.17 | 7.82  | -0.86 | 0.39372 |
| CABIN1     | 0.05  | 10.93 | 0.86  | 0.39373 |
| ZC3H12D    | 0.09  | 7.85  | 0.86  | 0.39381 |
| GPATCH11   | 0.08  | 7.50  | 0.86  | 0.39385 |
| RPS4XP2    | 0.15  | 7.72  | 0.86  | 0.39386 |
| PIGB       | -0.09 | 7.55  | -0.86 | 0.39404 |
| AOPEP      | 0.08  | 6.16  | 0.86  | 0.39417 |
| MAGEF1     | 0.08  | 7.41  | 0.86  | 0.39419 |
| BTK        | -0.06 | 9.90  | -0.86 | 0.39420 |
| OPRL1      | -0.08 | 8.58  | -0.86 | 0.39432 |
| SNX25      | -0.08 | 6.36  | -0.86 | 0.39444 |
| PSRC1      | -0.09 | 7.04  | -0.86 | 0.39445 |
| KIF3B      | 0.06  | 8.85  | 0.86  | 0.39447 |
| SERBP1P1   | -0.09 | 5.51  | -0.86 | 0.39449 |
| NOL3       | -0.10 | 5.77  | -0.86 | 0.39452 |
| HMGN4      | -0.06 | 9.78  | -0.86 | 0.39454 |
| CACNB4     | -0.14 | 5.55  | -0.86 | 0.39455 |
| AL049714.1 | -0.08 | 5.27  | -0.86 | 0.39466 |
| KIZ        | -0.06 | 8.06  | -0.86 | 0.39466 |
| SENPS      | -0.05 | 8.37  | -0.86 | 0.39500 |
| ALDH3B1    | 0.09  | 10.47 | 0.86  | 0.39502 |
| TANC2      | -0.11 | 7.28  | -0.86 | 0.39505 |
| IGKV3-15   | 0.19  | 8.17  | 0.86  | 0.39521 |
| SECISBP2   | -0.06 | 9.73  | -0.86 | 0.39523 |
| AC008750.2 | -0.12 | 5.81  | -0.86 | 0.39528 |
| COX16      | 0.08  | 5.25  | 0.86  | 0.39529 |
| RPL17P43   | 0.11  | 6.21  | 0.86  | 0.39533 |
| PLEKHM1P1  | -0.11 | 9.37  | -0.86 | 0.39550 |
| POP5       | 0.07  | 7.89  | 0.86  | 0.39562 |
| ISCU       | 0.06  | 10.47 | 0.86  | 0.39566 |
| TPD52      | 0.11  | 6.67  | 0.86  | 0.39570 |
| SETDB2     | -0.06 | 7.38  | -0.86 | 0.39575 |
| QRICH2     | 0.09  | 5.98  | 0.86  | 0.39583 |
| EIF4BP6    | 0.11  | 6.95  | 0.86  | 0.39592 |
| LTV1       | -0.09 | 6.87  | -0.86 | 0.39606 |



|              |       |       |       |         |
|--------------|-------|-------|-------|---------|
| C12orf49     | -0.05 | 8.76  | -0.86 | 0.39614 |
| LPAR1        | -0.12 | 6.10  | -0.86 | 0.39632 |
| SFRP2        | 0.21  | 6.26  | 0.86  | 0.39640 |
| RPS26P28     | 0.14  | 5.28  | 0.86  | 0.39642 |
| VBP1         | -0.06 | 8.02  | -0.86 | 0.39643 |
| AP001803.1   | -0.10 | 5.19  | -0.86 | 0.39644 |
| AL121944.2   | 0.10  | 5.06  | 0.86  | 0.39645 |
| BTF3P13      | 0.07  | 5.26  | 0.86  | 0.39646 |
| STON2        | -0.09 | 5.92  | -0.85 | 0.39666 |
| CRELD2       | 0.06  | 9.02  | 0.85  | 0.39669 |
| IGFBP3       | 0.15  | 7.06  | 0.85  | 0.39677 |
| AC009831.1   | 0.09  | 5.09  | 0.85  | 0.39680 |
| DNAJC16      | 0.07  | 7.06  | 0.85  | 0.39681 |
| AFF2         | -0.10 | 5.20  | -0.85 | 0.39690 |
| TPCN1        | 0.09  | 9.82  | 0.85  | 0.39704 |
| TMEM107      | 0.06  | 7.27  | 0.85  | 0.39712 |
| FEN1         | 0.07  | 7.65  | 0.85  | 0.39715 |
| RPL24P8      | 0.14  | 7.81  | 0.85  | 0.39717 |
| NRP2         | -0.10 | 5.07  | -0.85 | 0.39719 |
| IGHV3-30     | 0.22  | 8.19  | 0.85  | 0.39724 |
| MRE11        | -0.07 | 7.54  | -0.85 | 0.39725 |
| ATP5MC2P3    | -0.10 | 5.11  | -0.85 | 0.39732 |
| NOMO2        | -0.09 | 7.78  | -0.85 | 0.39751 |
| UHRF1        | 0.09  | 5.22  | 0.85  | 0.39762 |
| AC007728.2   | -0.12 | 6.51  | -0.85 | 0.39768 |
| AC006483.1   | -0.14 | 6.69  | -0.85 | 0.39782 |
| BCAT1        | -0.11 | 5.92  | -0.85 | 0.39793 |
| RRM1         | -0.07 | 7.70  | -0.85 | 0.39793 |
| HOOK1        | -0.10 | 5.50  | -0.85 | 0.39807 |
| RHCE         | 0.14  | 5.03  | 0.85  | 0.39810 |
| AC004890.1   | 0.08  | 5.61  | 0.85  | 0.39826 |
| NCAM1        | -0.13 | 7.78  | -0.85 | 0.39836 |
| ADAMTSL4-AS1 | -0.15 | 6.60  | -0.85 | 0.39838 |
| GPR89A       | 0.08  | 5.90  | 0.85  | 0.39843 |
| GDPGP1       | -0.08 | 5.93  | -0.85 | 0.39852 |
| CUL2         | -0.05 | 8.09  | -0.85 | 0.39867 |
| AC135050.3   | -0.11 | 5.26  | -0.85 | 0.39890 |
| RAB11FIP2    | -0.08 | 6.34  | -0.85 | 0.39931 |
| IQCN         | -0.15 | 7.59  | -0.85 | 0.39947 |
| VMAC         | 0.08  | 6.71  | 0.85  | 0.39948 |
| CACNA1A      | 0.11  | 5.58  | 0.85  | 0.39949 |
| AC090589.1   | 0.12  | 7.38  | 0.85  | 0.39951 |
| AC024909.1   | -0.07 | 6.13  | -0.85 | 0.39954 |
| THADA        | 0.06  | 8.74  | 0.85  | 0.39958 |
| PIAS3        | -0.06 | 7.96  | -0.85 | 0.39968 |
| CPA3         | -0.14 | 6.07  | -0.85 | 0.39969 |
| AL512353.2   | 0.10  | 5.69  | 0.85  | 0.39980 |
| AGTRAP       | 0.10  | 11.15 | 0.85  | 0.39992 |
| CXCL10       | -0.15 | 5.09  | -0.85 | 0.40011 |
| DDX10        | -0.06 | 7.22  | -0.85 | 0.40017 |

|            |       |       |       |         |
|------------|-------|-------|-------|---------|
| TUBB4A     | 0.11  | 6.45  | 0.85  | 0.40020 |
| CXCR2P1    | -0.13 | 8.29  | -0.85 | 0.40035 |
| DIAPH1     | -0.04 | 12.47 | -0.85 | 0.40040 |
| SHLD3      | -0.10 | 5.11  | -0.85 | 0.40045 |
| ADCY9      | -0.08 | 8.09  | -0.85 | 0.40052 |
| INTS4      | 0.05  | 8.73  | 0.85  | 0.40060 |
| AC092384.3 | 0.11  | 4.93  | 0.85  | 0.40084 |
| SNX9       | -0.09 | 7.67  | -0.85 | 0.40085 |
| WDR48      | -0.06 | 8.95  | -0.85 | 0.40100 |
| IFT52      | 0.05  | 7.73  | 0.85  | 0.40106 |
| EPHA4      | -0.10 | 6.73  | -0.85 | 0.40108 |
| SETD5      | -0.07 | 9.89  | -0.85 | 0.40151 |
| AC138969.1 | -0.08 | 6.41  | -0.85 | 0.40158 |
| AL162377.1 | 0.10  | 5.83  | 0.85  | 0.40170 |
| GUCY1B1    | -0.13 | 6.07  | -0.85 | 0.40177 |
| AC009506.2 | -0.12 | 7.58  | -0.85 | 0.40195 |
| TEDC1      | 0.10  | 6.83  | 0.85  | 0.40197 |
| POLR3G     | 0.13  | 6.16  | 0.84  | 0.40227 |
| MAP3K2-DT  | -0.10 | 5.23  | -0.84 | 0.40230 |
| TMEM138    | 0.06  | 8.44  | 0.84  | 0.40246 |
| WDR45      | 0.09  | 9.82  | 0.84  | 0.40253 |
| MARCHF1    | -0.09 | 8.38  | -0.84 | 0.40260 |
| C2orf15    | 0.12  | 5.19  | 0.84  | 0.40262 |
| AC083862.2 | -0.12 | 7.92  | -0.84 | 0.40275 |
| LDHAP7     | 0.08  | 5.07  | 0.84  | 0.40279 |
| BLM        | 0.08  | 6.54  | 0.84  | 0.40296 |
| ZSWIM5     | -0.10 | 5.69  | -0.84 | 0.40296 |
| ANAPC5     | 0.04  | 10.76 | 0.84  | 0.40299 |
| EEF1AKMT1  | 0.10  | 5.49  | 0.84  | 0.40304 |
| AC011899.3 | -0.11 | 5.68  | -0.84 | 0.40312 |
| ACTG1P1    | 0.11  | 5.73  | 0.84  | 0.40324 |
| ATG16L1    | -0.05 | 8.66  | -0.84 | 0.40347 |
| DCLRE1B    | -0.06 | 7.23  | -0.84 | 0.40362 |
| NFE2L1     | -0.05 | 10.57 | -0.84 | 0.40363 |
| HEMK1      | 0.08  | 8.66  | 0.84  | 0.40363 |
| AKAP17A    | -0.08 | 10.37 | -0.84 | 0.40371 |
| RIPK3      | -0.08 | 8.94  | -0.84 | 0.40374 |
| TMED10     | -0.06 | 10.29 | -0.84 | 0.40385 |
| CDK6       | -0.09 | 7.68  | -0.84 | 0.40389 |
| AC124248.1 | 0.11  | 5.46  | 0.84  | 0.40390 |
| N4BP3      | 0.11  | 6.39  | 0.84  | 0.40391 |
| RELL2      | 0.10  | 7.73  | 0.84  | 0.40435 |
| RPL7AP31   | 0.11  | 6.45  | 0.84  | 0.40439 |
| C4orf50    | -0.11 | 5.10  | -0.84 | 0.40451 |
| OTUD5      | 0.06  | 11.34 | 0.84  | 0.40457 |
| PRSS23     | -0.17 | 8.28  | -0.84 | 0.40459 |
| ATP5PF     | 0.08  | 8.52  | 0.84  | 0.40476 |
| PPIAP11    | 0.08  | 5.03  | 0.84  | 0.40494 |
| PRIM2      | -0.08 | 5.97  | -0.84 | 0.40496 |
| SEC24C     | -0.04 | 11.30 | -0.84 | 0.40500 |

|            |       |       |       |         |
|------------|-------|-------|-------|---------|
| AC099535.1 | 0.13  | 7.97  | 0.84  | 0.40511 |
| SRFBP1     | -0.07 | 5.60  | -0.84 | 0.40511 |
| NNT-AS1    | 0.08  | 6.40  | 0.84  | 0.40538 |
| AC010883.2 | -0.09 | 5.56  | -0.84 | 0.40539 |
| EEF1A1P29  | -0.07 | 5.27  | -0.84 | 0.40544 |
| CEP170B    | 0.11  | 5.76  | 0.84  | 0.40548 |
| MTCO2P2    | 0.11  | 5.15  | 0.84  | 0.40559 |
| AL391825.1 | -0.12 | 5.44  | -0.84 | 0.40563 |
| CCT6P1     | -0.08 | 6.21  | -0.84 | 0.40573 |
| ZDHHC18    | -0.12 | 12.57 | -0.84 | 0.40579 |
| HNRNPA1P21 | -0.09 | 5.71  | -0.84 | 0.40586 |
| SLC35B2    | 0.06  | 8.99  | 0.84  | 0.40604 |
| LINC00989  | -0.12 | 6.90  | -0.84 | 0.40618 |
| NTSR1      | -0.16 | 5.51  | -0.84 | 0.40619 |
| RNASET2    | 0.11  | 11.61 | 0.84  | 0.40627 |
| MMEL1      | 0.11  | 5.28  | 0.84  | 0.40629 |
| ELOBP2     | 0.08  | 5.71  | 0.84  | 0.40635 |
| KCNH3      | -0.12 | 7.24  | -0.84 | 0.40636 |
| RPRD2      | 0.06  | 9.63  | 0.84  | 0.40641 |
| ANKRD42    | -0.07 | 6.15  | -0.84 | 0.40649 |
| VAMP4      | -0.07 | 7.19  | -0.84 | 0.40653 |
| PRKACB     | -0.10 | 8.56  | -0.84 | 0.40657 |
| LRRC37A    | -0.12 | 5.34  | -0.84 | 0.40666 |
| GTF2A2     | 0.07  | 8.07  | 0.84  | 0.40671 |
| DNAJC15    | 0.09  | 7.91  | 0.84  | 0.40689 |
| IGKV2-24   | 0.20  | 6.14  | 0.84  | 0.40690 |
| MTHFD2L    | 0.08  | 5.54  | 0.84  | 0.40691 |
| AC022149.1 | -0.11 | 5.90  | -0.84 | 0.40696 |
| ASB1       | -0.06 | 8.79  | -0.84 | 0.40700 |
| AL022345.4 | 0.11  | 5.16  | 0.84  | 0.40712 |
| SMARCE1P5  | -0.09 | 5.42  | -0.84 | 0.40716 |
| SLC27A2    | -0.09 | 4.89  | -0.84 | 0.40721 |
| AP002478.1 | -0.11 | 5.42  | -0.84 | 0.40731 |
| TANGO2     | 0.08  | 10.20 | 0.84  | 0.40732 |
| PAM16      | -0.11 | 7.07  | -0.84 | 0.40747 |
| UQCRFS1P1  | 0.08  | 5.09  | 0.83  | 0.40757 |
| GABARAPL2  | -0.09 | 10.09 | -0.83 | 0.40794 |
| AC027309.2 | 0.10  | 6.80  | 0.83  | 0.40794 |
| SEC11C     | 0.09  | 8.28  | 0.83  | 0.40801 |
| AC104794.3 | 0.08  | 7.22  | 0.83  | 0.40816 |
| POLE3      | 0.06  | 9.33  | 0.83  | 0.40828 |
| ZNF681     | 0.09  | 5.53  | 0.83  | 0.40830 |
| HOXA-AS2   | 0.09  | 5.00  | 0.83  | 0.40837 |
| IER3IP1    | 0.08  | 6.50  | 0.83  | 0.40851 |
| ATP1B1     | -0.09 | 5.63  | -0.83 | 0.40854 |
| DLEU2      | -0.10 | 7.35  | -0.83 | 0.40869 |
| SUCLA2     | -0.07 | 7.06  | -0.83 | 0.40872 |
| NDRG1      | -0.06 | 11.31 | -0.83 | 0.40881 |
| GUCY1A1    | -0.11 | 5.40  | -0.83 | 0.40904 |
| PPP1CB     | -0.07 | 9.77  | -0.83 | 0.40910 |

|            |       |       |       |         |
|------------|-------|-------|-------|---------|
| TPPP3      | 0.16  | 8.12  | 0.83  | 0.40923 |
| CCND3      | 0.07  | 12.41 | 0.83  | 0.40933 |
| RPL34P18   | 0.15  | 8.06  | 0.83  | 0.40947 |
| ZG16B      | -0.10 | 5.45  | -0.83 | 0.40960 |
| NAPA       | -0.09 | 10.75 | -0.83 | 0.40964 |
| PRDM11     | -0.07 | 6.82  | -0.83 | 0.40971 |
| SH3BGRL2   | 0.14  | 7.46  | 0.83  | 0.40977 |
| LINC01772  | -0.08 | 5.26  | -0.83 | 0.40991 |
| AC098591.3 | 0.11  | 7.01  | 0.83  | 0.40991 |
| RN7SL364P  | 0.11  | 5.07  | 0.83  | 0.41000 |
| LSMEM1     | -0.11 | 6.42  | -0.83 | 0.41003 |
| RNF123     | 0.10  | 9.95  | 0.83  | 0.41005 |
| FCER1G     | -0.11 | 12.09 | -0.83 | 0.41011 |
| AC008736.1 | -0.08 | 5.19  | -0.83 | 0.41022 |
| MYB        | 0.08  | 6.15  | 0.83  | 0.41022 |
| IGKV1-5    | 0.19  | 8.50  | 0.83  | 0.41023 |
| IGHJ1      | 0.11  | 5.13  | 0.83  | 0.41043 |
| SARS2      | 0.08  | 5.42  | 0.83  | 0.41052 |
| SIRPB1     | -0.15 | 10.82 | -0.83 | 0.41059 |
| AMMECR1    | 0.08  | 6.75  | 0.83  | 0.41080 |
| ADGRE4P    | -0.16 | 6.55  | -0.83 | 0.41085 |
| WDR41      | -0.06 | 7.65  | -0.83 | 0.41116 |
| CERS2      | -0.05 | 10.93 | -0.83 | 0.41126 |
| CHI3L2     | 0.12  | 7.35  | 0.83  | 0.41150 |
| GTPBP3     | 0.08  | 7.19  | 0.83  | 0.41152 |
| CHAMP1     | -0.08 | 7.51  | -0.83 | 0.41174 |
| AL133216.2 | -0.10 | 6.56  | -0.83 | 0.41177 |
| CCDC170    | -0.11 | 6.44  | -0.83 | 0.41177 |
| CROCCP2    | 0.10  | 8.33  | 0.83  | 0.41182 |
| AC092164.1 | -0.09 | 4.90  | -0.83 | 0.41183 |
| SPCS3      | -0.05 | 9.75  | -0.83 | 0.41185 |
| FLACC1     | 0.10  | 5.31  | 0.83  | 0.41191 |
| AC007237.1 | 0.09  | 5.02  | 0.83  | 0.41192 |
| ZNF44      | 0.06  | 8.09  | 0.83  | 0.41192 |
| KLF6       | 0.10  | 12.17 | 0.83  | 0.41193 |
| RHOG       | 0.10  | 12.85 | 0.83  | 0.41195 |
| PDP2       | 0.09  | 6.69  | 0.83  | 0.41199 |
| TMEM79     | 0.07  | 7.56  | 0.83  | 0.41203 |
| DENND4C    | 0.09  | 7.69  | 0.83  | 0.41204 |
| ILKAP      | 0.06  | 8.50  | 0.83  | 0.41204 |
| SLC10A7    | -0.08 | 5.92  | -0.83 | 0.41208 |
| CFD        | 0.23  | 10.59 | 0.83  | 0.41211 |
| COQ5       | 0.05  | 7.66  | 0.83  | 0.41213 |
| ZKSCAN5    | -0.05 | 7.64  | -0.83 | 0.41217 |
| LYPLA2P1   | 0.08  | 5.52  | 0.83  | 0.41223 |
| XPO6       | -0.12 | 13.47 | -0.83 | 0.41223 |
| AC007160.1 | 0.08  | 5.74  | 0.83  | 0.41226 |
| SNX24      | -0.07 | 5.61  | -0.83 | 0.41229 |
| YKT6       | 0.05  | 10.11 | 0.83  | 0.41230 |
| SF3A3P2    | -0.09 | 5.30  | -0.83 | 0.41258 |

|            |       |       |       |         |
|------------|-------|-------|-------|---------|
| AC012645.4 | -0.10 | 5.28  | -0.83 | 0.41278 |
| AC092490.1 | -0.38 | 9.46  | -0.82 | 0.41318 |
| EED        | -0.06 | 7.43  | -0.82 | 0.41329 |
| ATP6V0E1   | 0.09  | 11.21 | 0.82  | 0.41334 |
| RPL26P19   | 0.14  | 8.56  | 0.82  | 0.41337 |
| CLEC17A    | 0.14  | 6.78  | 0.82  | 0.41338 |
| LEF1-AS1   | 0.12  | 5.21  | 0.82  | 0.41341 |
| ANAPC1     | -0.07 | 7.36  | -0.82 | 0.41345 |
| ZNF69      | -0.08 | 5.46  | -0.82 | 0.41349 |
| RBPJ       | 0.11  | 10.29 | 0.82  | 0.41381 |
| FANCI      | -0.08 | 6.82  | -0.82 | 0.41401 |
| ZNF132     | -0.14 | 5.72  | -0.82 | 0.41402 |
| HS3ST3B1   | 0.09  | 7.52  | 0.82  | 0.41427 |
| COPS2      | -0.08 | 7.67  | -0.82 | 0.41431 |
| ELL        | -0.09 | 10.22 | -0.82 | 0.41435 |
| AC012676.5 | -0.12 | 5.64  | -0.82 | 0.41439 |
| AC007611.1 | 0.09  | 5.18  | 0.82  | 0.41444 |
| TMEM63C    | -0.13 | 6.70  | -0.82 | 0.41456 |
| COG4       | 0.05  | 9.65  | 0.82  | 0.41469 |
| TFB2M      | -0.07 | 6.47  | -0.82 | 0.41471 |
| AC009779.3 | -0.07 | 6.51  | -0.82 | 0.41473 |
| URB2       | -0.08 | 6.93  | -0.82 | 0.41497 |
| PKHD1L1    | -0.12 | 5.58  | -0.82 | 0.41500 |
| RNF4       | -0.04 | 10.07 | -0.82 | 0.41511 |
| PRDM1      | -0.09 | 9.07  | -0.82 | 0.41513 |
| KCTD1      | -0.08 | 5.54  | -0.82 | 0.41514 |
| HEBP2      | -0.07 | 9.89  | -0.82 | 0.41520 |
| RMDN3      | -0.06 | 8.22  | -0.82 | 0.41522 |
| CYP2R1     | 0.07  | 6.77  | 0.82  | 0.41524 |
| HNRNPD     | -0.06 | 10.54 | -0.82 | 0.41528 |
| PALM2AKAP2 | -0.10 | 7.65  | -0.82 | 0.41531 |
| AC005280.2 | -0.13 | 6.22  | -0.82 | 0.41547 |
| DUSP1      | -0.15 | 11.40 | -0.82 | 0.41555 |
| GPR160     | -0.11 | 7.04  | -0.82 | 0.41573 |
| SPATA24    | 0.09  | 5.26  | 0.82  | 0.41580 |
| MTUS1      | 0.12  | 5.37  | 0.82  | 0.41585 |
| COTL1      | 0.08  | 14.50 | 0.82  | 0.41586 |
| ZNF830     | -0.04 | 8.32  | -0.82 | 0.41589 |
| SMUG1      | 0.07  | 7.95  | 0.82  | 0.41593 |
| MTDHP3     | -0.16 | 4.97  | -0.82 | 0.41595 |
| ESD        | 0.07  | 8.89  | 0.82  | 0.41618 |
| MINDY1     | -0.10 | 10.43 | -0.82 | 0.41623 |
| TRMT10A    | -0.08 | 5.49  | -0.82 | 0.41634 |
| LASP1      | -0.07 | 12.77 | -0.82 | 0.41651 |
| CAMKK2     | -0.08 | 10.87 | -0.82 | 0.41652 |
| CAMP       | 0.22  | 8.47  | 0.82  | 0.41674 |
| CTSG       | -0.24 | 6.45  | -0.82 | 0.41682 |
| AL031775.1 | -0.08 | 5.57  | -0.82 | 0.41682 |
| CCR5AS     | 0.14  | 5.39  | 0.82  | 0.41686 |
| LINC00211  | -0.13 | 5.83  | -0.82 | 0.41699 |

|            |       |       |       |         |
|------------|-------|-------|-------|---------|
| ATP5MC1    | 0.10  | 8.78  | 0.82  | 0.41710 |
| HLA-DRB1   | 0.12  | 13.34 | 0.82  | 0.41712 |
| LGALS9DP   | -0.09 | 5.59  | -0.82 | 0.41723 |
| AL118506.1 | 0.07  | 7.31  | 0.82  | 0.41726 |
| NRSN2      | 0.10  | 5.67  | 0.82  | 0.41732 |
| CYP2U1     | -0.08 | 6.18  | -0.82 | 0.41751 |
| TUBAP2     | -0.11 | 6.73  | -0.82 | 0.41753 |
| HCG27      | -0.16 | 9.58  | -0.82 | 0.41763 |
| UBE3D      | 0.10  | 5.78  | 0.82  | 0.41764 |
| CHMP3      | 0.07  | 9.27  | 0.82  | 0.41776 |
| LAP3P2     | -0.14 | 5.50  | -0.82 | 0.41786 |
| ZNF445     | -0.08 | 8.20  | -0.82 | 0.41800 |
| MESD       | 0.05  | 8.90  | 0.82  | 0.41800 |
| PPIL3      | 0.08  | 6.77  | 0.82  | 0.41800 |
| AC132872.1 | -0.11 | 6.79  | -0.82 | 0.41806 |
| AL627309.6 | 0.16  | 7.35  | 0.82  | 0.41813 |
| DAGLB      | 0.06  | 9.25  | 0.82  | 0.41817 |
| RASSF4     | -0.09 | 9.94  | -0.82 | 0.41824 |
| GAS6-AS1   | 0.18  | 6.19  | 0.82  | 0.41832 |
| ZNF182     | -0.07 | 7.26  | -0.82 | 0.41835 |
| AUH        | -0.07 | 6.30  | -0.82 | 0.41836 |
| TUBA1A     | -0.11 | 12.05 | -0.82 | 0.41841 |
| STX1B      | 0.10  | 5.27  | 0.82  | 0.41850 |
| AC106806.1 | 0.11  | 6.51  | 0.82  | 0.41864 |
| PVT1       | 0.09  | 7.40  | 0.82  | 0.41870 |
| ARPC3P1    | -0.10 | 7.12  | -0.82 | 0.41873 |
| TBCAP1     | 0.10  | 5.92  | 0.81  | 0.41885 |
| TFE3       | -0.08 | 11.02 | -0.81 | 0.41889 |
| RBM8B      | 0.10  | 6.28  | 0.81  | 0.41897 |
| TNRC6A     | 0.07  | 9.31  | 0.81  | 0.41909 |
| BTBD19     | -0.15 | 5.78  | -0.81 | 0.41914 |
| LOXHD1     | -0.13 | 5.96  | -0.81 | 0.41926 |
| EIF4ENIF1  | 0.04  | 8.86  | 0.81  | 0.41934 |
| RBKS       | 0.07  | 5.50  | 0.81  | 0.41960 |
| PGAM1      | -0.06 | 9.14  | -0.81 | 0.41962 |
| LYSMD4     | 0.08  | 6.93  | 0.81  | 0.41982 |
| AC011005.1 | 0.09  | 6.83  | 0.81  | 0.42009 |
| AL390039.1 | 0.09  | 5.26  | 0.81  | 0.42025 |
| ZFHX2-AS1  | 0.11  | 5.61  | 0.81  | 0.42026 |
| PDCD2L     | -0.10 | 5.65  | -0.81 | 0.42034 |
| DGCR2      | 0.07  | 11.37 | 0.81  | 0.42036 |
| ETFRF1     | -0.08 | 6.37  | -0.81 | 0.42037 |
| SUPT3H     | 0.09  | 6.41  | 0.81  | 0.42042 |
| CD1A       | -0.09 | 5.60  | -0.81 | 0.42047 |
| SLU7       | 0.07  | 9.80  | 0.81  | 0.42065 |
| SDCBP2-AS1 | -0.08 | 5.96  | -0.81 | 0.42085 |
| DSEL       | -0.10 | 5.39  | -0.81 | 0.42115 |
| TMEM42     | 0.07  | 7.42  | 0.81  | 0.42119 |
| IFI35      | -0.15 | 10.01 | -0.81 | 0.42123 |
| CBFB       | -0.06 | 8.36  | -0.81 | 0.42126 |

|                |       |       |       |         |
|----------------|-------|-------|-------|---------|
| UNKL           | -0.10 | 9.07  | -0.81 | 0.42134 |
| AC006369.1     | 0.10  | 6.01  | 0.81  | 0.42143 |
| THEMIS         | -0.11 | 7.03  | -0.81 | 0.42149 |
| MAF            | -0.09 | 8.41  | -0.81 | 0.42168 |
| PHYH           | 0.07  | 6.84  | 0.81  | 0.42171 |
| THBS3          | -0.10 | 8.36  | -0.81 | 0.42173 |
| MRPL35         | 0.05  | 7.60  | 0.81  | 0.42174 |
| MSMO1          | -0.07 | 6.50  | -0.81 | 0.42182 |
| ISYNA1         | 0.09  | 8.51  | 0.81  | 0.42183 |
| HMGB2          | -0.11 | 11.01 | -0.81 | 0.42184 |
| CD4            | 0.09  | 12.72 | 0.81  | 0.42186 |
| SOX8           | 0.13  | 5.73  | 0.81  | 0.42205 |
| NDUFAF7        | -0.07 | 7.07  | -0.81 | 0.42208 |
| SH2B2          | 0.11  | 9.00  | 0.81  | 0.42222 |
| ARMCX5-GPRASP2 | 0.08  | 5.23  | 0.81  | 0.42233 |
| MFHAS1         | 0.07  | 8.47  | 0.81  | 0.42243 |
| COMMD5         | 0.08  | 8.98  | 0.81  | 0.42244 |
| KCNIP2         | 0.12  | 5.95  | 0.81  | 0.42260 |
| RAMACL         | 0.07  | 5.69  | 0.81  | 0.42271 |
| AC244197.3     | -0.12 | 5.05  | -0.81 | 0.42275 |
| HP             | -0.20 | 7.58  | -0.81 | 0.42289 |
| C1orf159       | 0.09  | 7.26  | 0.81  | 0.42291 |
| GOLGA2         | -0.06 | 9.52  | -0.81 | 0.42305 |
| C11orf58       | 0.05  | 9.19  | 0.81  | 0.42359 |
| FSD1           | 0.11  | 5.67  | 0.81  | 0.42360 |
| SLC39A7        | 0.06  | 9.85  | 0.81  | 0.42368 |
| AC007686.3     | -0.10 | 6.32  | -0.81 | 0.42370 |
| ZNF765         | -0.08 | 6.47  | -0.81 | 0.42377 |
| AFG3L1P        | -0.07 | 7.84  | -0.81 | 0.42384 |
| RRAGD          | -0.10 | 7.47  | -0.81 | 0.42397 |
| DHRS1          | 0.08  | 8.62  | 0.81  | 0.42398 |
| GLRX5          | 0.17  | 10.15 | 0.81  | 0.42412 |
| FXR1           | -0.06 | 9.20  | -0.81 | 0.42416 |
| SF3B6          | 0.07  | 9.38  | 0.81  | 0.42421 |
| HRH2           | -0.15 | 11.85 | -0.81 | 0.42422 |
| RADX           | -0.10 | 5.18  | -0.80 | 0.42457 |
| VCP            | 0.04  | 11.89 | 0.80  | 0.42475 |
| ELAVL1         | 0.05  | 9.61  | 0.80  | 0.42483 |
| EXOC6B         | -0.08 | 6.37  | -0.80 | 0.42486 |
| ZSCAN22        | 0.06  | 6.55  | 0.80  | 0.42504 |
| DHX29          | -0.07 | 7.56  | -0.80 | 0.42505 |
| TBC1D16        | -0.09 | 6.18  | -0.80 | 0.42516 |
| LPIN1          | 0.05  | 8.88  | 0.80  | 0.42533 |
| GP6            | 0.11  | 6.33  | 0.80  | 0.42534 |
| AC012510.1     | 0.09  | 5.96  | 0.80  | 0.42555 |
| DGKA           | 0.08  | 11.41 | 0.80  | 0.42569 |
| SAR1B          | -0.05 | 7.95  | -0.80 | 0.42577 |
| RAB30          | 0.10  | 6.81  | 0.80  | 0.42579 |
| ZNF586         | -0.07 | 7.80  | -0.80 | 0.42580 |
| TPM2           | 0.13  | 7.58  | 0.80  | 0.42592 |

|            |       |       |       |         |
|------------|-------|-------|-------|---------|
| SERBP1P5   | -0.10 | 5.84  | -0.80 | 0.42593 |
| RPS18P9    | 0.07  | 6.23  | 0.80  | 0.42604 |
| SEC61B     | 0.10  | 8.69  | 0.80  | 0.42607 |
| HYLS1      | -0.07 | 6.70  | -0.80 | 0.42629 |
| CSF1R      | -0.10 | 12.18 | -0.80 | 0.42630 |
| ANKRD33B   | -0.13 | 6.70  | -0.80 | 0.42637 |
| ENC1       | -0.14 | 7.38  | -0.80 | 0.42640 |
| TGFB3      | 0.12  | 5.64  | 0.80  | 0.42643 |
| FAM214B    | -0.10 | 10.50 | -0.80 | 0.42665 |
| GSPT2      | 0.06  | 7.00  | 0.80  | 0.42677 |
| NDUFS1     | -0.04 | 8.44  | -0.80 | 0.42686 |
| NAT10      | 0.06  | 9.65  | 0.80  | 0.42688 |
| RILP       | 0.15  | 8.87  | 0.80  | 0.42713 |
| ASTE1      | -0.06 | 7.74  | -0.80 | 0.42714 |
| MPDU1      | 0.07  | 9.20  | 0.80  | 0.42720 |
| PHF7       | 0.07  | 6.12  | 0.80  | 0.42723 |
| LCOR       | -0.06 | 8.72  | -0.80 | 0.42724 |
| FOXO1      | 0.06  | 8.86  | 0.80  | 0.42730 |
| CKB        | 0.14  | 6.88  | 0.80  | 0.42771 |
| ATG4C      | -0.07 | 6.75  | -0.80 | 0.42782 |
| FP565260.6 | -0.08 | 6.45  | -0.80 | 0.42801 |
| RAB9A      | -0.06 | 7.73  | -0.80 | 0.42810 |
| EIF1AX     | 0.08  | 7.94  | 0.80  | 0.42814 |
| FASTKD1    | -0.06 | 6.54  | -0.80 | 0.42816 |
| UBE2H      | -0.08 | 10.49 | -0.80 | 0.42824 |
| PPCS       | -0.04 | 8.76  | -0.80 | 0.42832 |
| KDEL2      | 0.05  | 9.32  | 0.80  | 0.42852 |
| AC131025.1 | 0.10  | 4.97  | 0.80  | 0.42852 |
| CFAP410    | 0.10  | 8.02  | 0.80  | 0.42852 |
| SCO2       | -0.14 | 9.47  | -0.80 | 0.42871 |
| FRAT2      | -0.11 | 11.79 | -0.80 | 0.42873 |
| LIMD1-AS1  | -0.08 | 5.71  | -0.80 | 0.42883 |
| LINC01578  | 0.07  | 8.43  | 0.80  | 0.42884 |
| IGKJ4      | 0.17  | 5.75  | 0.80  | 0.42894 |
| WDR45B     | -0.04 | 9.42  | -0.80 | 0.42903 |
| TNFRSF11A  | -0.10 | 5.00  | -0.80 | 0.42922 |
| POTEM      | 0.09  | 5.93  | 0.80  | 0.42936 |
| KLK1       | 0.14  | 5.84  | 0.80  | 0.42938 |
| AC026748.3 | -0.09 | 5.81  | -0.80 | 0.42956 |
| AC012615.1 | 0.08  | 6.34  | 0.80  | 0.42968 |
| ZKSCAN4    | -0.06 | 7.30  | -0.80 | 0.42983 |
| USP51      | 0.08  | 5.05  | 0.80  | 0.42988 |
| GTPBP10    | -0.07 | 6.89  | -0.80 | 0.42995 |
| CWC15      | 0.06  | 8.64  | 0.80  | 0.43014 |
| AC112247.1 | -0.09 | 5.29  | -0.80 | 0.43018 |
| BCAS3      | -0.05 | 8.82  | -0.79 | 0.43027 |
| TENT5C     | 0.19  | 9.80  | 0.79  | 0.43035 |
| ANAPC13    | 0.06  | 8.14  | 0.79  | 0.43067 |
| R3HDM4     | 0.14  | 13.48 | 0.79  | 0.43071 |
| S100P      | 0.26  | 10.69 | 0.79  | 0.43077 |



|            |       |       |       |         |
|------------|-------|-------|-------|---------|
| CFAP58-DT  | -0.11 | 5.29  | -0.79 | 0.43104 |
| CYP1B1-AS1 | -0.13 | 5.46  | -0.79 | 0.43110 |
| GID8       | 0.04  | 10.00 | 0.79  | 0.43110 |
| SNORD89    | 0.11  | 5.75  | 0.79  | 0.43112 |
| CUTALP     | 0.16  | 8.11  | 0.79  | 0.43117 |
| AC008427.2 | 0.08  | 5.06  | 0.79  | 0.43127 |
| RTCB       | 0.07  | 9.92  | 0.79  | 0.43131 |
| PAQR6      | -0.17 | 6.58  | -0.79 | 0.43138 |
| SCFD2      | 0.06  | 7.63  | 0.79  | 0.43144 |
| MRPS22     | -0.06 | 7.99  | -0.79 | 0.43154 |
| HSP90AB1   | 0.06  | 12.56 | 0.79  | 0.43158 |
| MCUB       | 0.08  | 9.04  | 0.79  | 0.43164 |
| TBC1D22B   | 0.09  | 8.34  | 0.79  | 0.43164 |
| MYL6P2     | 0.06  | 5.30  | 0.79  | 0.43181 |
| DHX35      | -0.06 | 7.31  | -0.79 | 0.43187 |
| SLC25A28   | -0.07 | 9.47  | -0.79 | 0.43197 |
| AC005622.1 | -0.11 | 5.36  | -0.79 | 0.43206 |
| ZNF614     | -0.07 | 6.21  | -0.79 | 0.43210 |
| RBM6       | -0.07 | 10.45 | -0.79 | 0.43221 |
| PHYHD1     | 0.14  | 5.09  | 0.79  | 0.43226 |
| AC017035.1 | 0.11  | 5.33  | 0.79  | 0.43236 |
| WDHD1      | -0.08 | 5.24  | -0.79 | 0.43236 |
| TNFRSF10D  | 0.08  | 6.91  | 0.79  | 0.43241 |
| OR2A20P    | 0.10  | 4.89  | 0.79  | 0.43248 |
| SH3D21     | 0.10  | 6.41  | 0.79  | 0.43256 |
| AC068338.2 | 0.09  | 5.39  | 0.79  | 0.43258 |
| HSPA8P8    | -0.12 | 6.56  | -0.79 | 0.43294 |
| CCL3       | -0.12 | 6.68  | -0.79 | 0.43305 |
| ETAA1      | -0.07 | 6.18  | -0.79 | 0.43324 |
| NOC3L      | -0.09 | 6.38  | -0.79 | 0.43325 |
| INTS6-AS1  | -0.09 | 5.39  | -0.79 | 0.43325 |
| RAC1       | 0.08  | 11.51 | 0.79  | 0.43330 |
| CEBPB      | -0.12 | 12.04 | -0.79 | 0.43344 |
| AC063947.2 | -0.09 | 5.14  | -0.79 | 0.43345 |
| NPM1P24    | 0.11  | 5.38  | 0.79  | 0.43358 |
| ALDH1B1    | -0.08 | 6.60  | -0.79 | 0.43368 |
| CARD16     | -0.10 | 10.07 | -0.79 | 0.43373 |
| SLC2A9     | -0.08 | 7.07  | -0.79 | 0.43375 |
| SLC18B1    | -0.07 | 7.37  | -0.79 | 0.43375 |
| GPC1       | 0.08  | 4.96  | 0.79  | 0.43376 |
| ZFP30      | -0.07 | 5.50  | -0.79 | 0.43387 |
| PLGLB1     | -0.08 | 4.95  | -0.79 | 0.43391 |
| ANKRD9     | 0.15  | 7.31  | 0.79  | 0.43393 |
| JMY        | -0.07 | 6.48  | -0.79 | 0.43404 |
| METTL3     | -0.07 | 8.66  | -0.79 | 0.43409 |
| AL354877.1 | -0.11 | 5.60  | -0.79 | 0.43411 |
| FAM117A    | 0.09  | 10.62 | 0.79  | 0.43416 |
| PPP1R32    | 0.09  | 6.69  | 0.79  | 0.43422 |
| GRIPAP1    | 0.06  | 10.67 | 0.79  | 0.43423 |
| GRK3       | -0.07 | 9.20  | -0.79 | 0.43432 |

|            |       |       |       |         |
|------------|-------|-------|-------|---------|
| ZNF213     | 0.06  | 8.61  | 0.79  | 0.43432 |
| CWC27      | 0.07  | 7.43  | 0.79  | 0.43453 |
| PMS2       | -0.07 | 6.87  | -0.79 | 0.43463 |
| CNN2P6     | -0.10 | 5.38  | -0.79 | 0.43469 |
| AP3D1      | 0.04  | 11.38 | 0.79  | 0.43469 |
| DIP2C      | -0.09 | 5.79  | -0.79 | 0.43473 |
| IFT27      | 0.07  | 7.62  | 0.79  | 0.43479 |
| MTCH2      | -0.06 | 8.34  | -0.79 | 0.43524 |
| WNT10B     | 0.11  | 6.27  | 0.79  | 0.43540 |
| ZNF890P    | 0.12  | 5.20  | 0.79  | 0.43541 |
| SNAP29     | 0.05  | 9.43  | 0.79  | 0.43552 |
| HOPX       | -0.11 | 8.55  | -0.79 | 0.43553 |
| TUBBP1     | -0.08 | 5.69  | -0.79 | 0.43563 |
| AL009174.1 | 0.10  | 7.51  | 0.79  | 0.43577 |
| NOL6       | 0.06  | 9.23  | 0.79  | 0.43588 |
| AP000926.2 | -0.08 | 5.30  | -0.79 | 0.43592 |
| EEF1DP5    | 0.09  | 5.85  | 0.78  | 0.43617 |
| MMP14      | -0.11 | 6.62  | -0.78 | 0.43618 |
| KPNA5      | 0.08  | 6.37  | 0.78  | 0.43633 |
| AC022494.1 | 0.11  | 5.43  | 0.78  | 0.43652 |
| AC004381.3 | 0.13  | 5.44  | 0.78  | 0.43656 |
| DYSF       | -0.15 | 12.79 | -0.78 | 0.43658 |
| SNAPC5     | 0.06  | 7.44  | 0.78  | 0.43663 |
| N6AMT1     | -0.08 | 6.13  | -0.78 | 0.43667 |
| DIPK1B     | -0.11 | 5.94  | -0.78 | 0.43679 |
| FKTN       | -0.07 | 6.00  | -0.78 | 0.43680 |
| PSMD12     | -0.06 | 7.69  | -0.78 | 0.43682 |
| NFRKB      | -0.05 | 9.55  | -0.78 | 0.43684 |
| RTKN2      | -0.10 | 5.73  | -0.78 | 0.43686 |
| CCNI       | 0.07  | 12.09 | 0.78  | 0.43696 |
| GDPD5      | 0.09  | 9.45  | 0.78  | 0.43713 |
| CCDC96     | 0.07  | 5.70  | 0.78  | 0.43718 |
| P2RY11     | 0.09  | 6.83  | 0.78  | 0.43720 |
| LIMA1      | -0.08 | 6.88  | -0.78 | 0.43726 |
| TAL1       | 0.16  | 8.72  | 0.78  | 0.43726 |
| GLA        | -0.06 | 8.27  | -0.78 | 0.43730 |
| NGRN       | -0.07 | 7.19  | -0.78 | 0.43732 |
| AC010883.1 | -0.09 | 5.49  | -0.78 | 0.43752 |
| AVPI1      | 0.10  | 5.57  | 0.78  | 0.43777 |
| ATP6V0A2   | -0.06 | 7.70  | -0.78 | 0.43783 |
| NDUFAF5    | -0.09 | 6.19  | -0.78 | 0.43804 |
| RPS27AP11  | 0.09  | 6.33  | 0.78  | 0.43812 |
| RPS6P25    | 0.11  | 7.24  | 0.78  | 0.43816 |
| TOMM20P4   | -0.10 | 5.07  | -0.78 | 0.43852 |
| PPIL2      | 0.04  | 10.03 | 0.78  | 0.43881 |
| ATP1A1     | 0.05  | 12.24 | 0.78  | 0.43916 |
| ISG20L2    | 0.04  | 9.77  | 0.78  | 0.43924 |
| USP54      | -0.07 | 5.87  | -0.78 | 0.43937 |
| NFAT5      | -0.10 | 7.02  | -0.78 | 0.43939 |
| AP002414.4 | 0.08  | 5.66  | 0.78  | 0.43946 |

|              |       |       |       |         |
|--------------|-------|-------|-------|---------|
| CHROMR       | -0.08 | 5.91  | -0.78 | 0.43959 |
| RNF121       | 0.06  | 8.01  | 0.78  | 0.43973 |
| PTK2B        | -0.07 | 12.51 | -0.78 | 0.44002 |
| RBM8A        | 0.06  | 10.27 | 0.78  | 0.44005 |
| WHAMMP3      | -0.09 | 6.26  | -0.78 | 0.44017 |
| KCMF1        | -0.05 | 9.61  | -0.78 | 0.44019 |
| ARMCX4       | -0.09 | 5.87  | -0.78 | 0.44038 |
| NCR1         | 0.11  | 7.80  | 0.78  | 0.44040 |
| DGCR8        | -0.06 | 9.09  | -0.78 | 0.44050 |
| PUS3         | 0.06  | 6.89  | 0.78  | 0.44052 |
| KCTD7        | -0.07 | 8.04  | -0.78 | 0.44054 |
| SSR4P1       | 0.08  | 5.38  | 0.78  | 0.44056 |
| LRRC46       | -0.08 | 5.40  | -0.78 | 0.44058 |
| SPSB1        | 0.09  | 6.34  | 0.78  | 0.44071 |
| LARP1        | -0.04 | 10.56 | -0.78 | 0.44071 |
| SYTL4        | -0.10 | 5.72  | -0.78 | 0.44074 |
| ZNF770       | -0.08 | 7.58  | -0.78 | 0.44080 |
| D2HGDH       | 0.11  | 8.54  | 0.78  | 0.44091 |
| NFAM1        | -0.10 | 12.97 | -0.78 | 0.44095 |
| LANCL2       | -0.07 | 7.12  | -0.78 | 0.44102 |
| TOLLIP-AS1   | -0.09 | 5.13  | -0.78 | 0.44107 |
| BICDL1       | 0.08  | 8.70  | 0.78  | 0.44129 |
| TEX22        | -0.09 | 5.09  | -0.78 | 0.44133 |
| AC026471.4   | 0.08  | 5.42  | 0.78  | 0.44162 |
| ARHGEF35-AS1 | 0.10  | 5.70  | 0.78  | 0.44165 |
| TPRN         | 0.09  | 7.14  | 0.78  | 0.44165 |
| DAGLA        | -0.10 | 6.36  | -0.78 | 0.44167 |
| TMEM38A      | 0.09  | 6.52  | 0.78  | 0.44170 |
| TUBB2A       | -0.28 | 6.86  | -0.78 | 0.44175 |
| WDR5         | 0.05  | 8.85  | 0.78  | 0.44178 |
| PEAR1        | -0.12 | 6.92  | -0.78 | 0.44181 |
| GPR146       | 0.14  | 8.29  | 0.77  | 0.44197 |
| AC016773.2   | 0.11  | 5.38  | 0.77  | 0.44210 |
| ST20         | -0.13 | 7.15  | -0.77 | 0.44228 |
| SNRPCP2      | 0.08  | 5.31  | 0.77  | 0.44229 |
| AL049873.1   | 0.13  | 9.59  | 0.77  | 0.44237 |
| RRAGA        | 0.04  | 9.47  | 0.77  | 0.44243 |
| FAAHP1       | 0.11  | 6.08  | 0.77  | 0.44245 |
| ATP6V1E1P1   | 0.08  | 5.60  | 0.77  | 0.44248 |
| ZNF2         | -0.06 | 6.37  | -0.77 | 0.44259 |
| CTSB         | 0.09  | 13.06 | 0.77  | 0.44296 |
| WRN          | -0.08 | 6.50  | -0.77 | 0.44305 |
| ETV6         | -0.07 | 10.06 | -0.77 | 0.44313 |
| DDX6         | -0.07 | 10.63 | -0.77 | 0.44330 |
| MIR9-3HG     | 0.10  | 6.47  | 0.77  | 0.44337 |
| THEMIS2      | -0.08 | 12.65 | -0.77 | 0.44338 |
| CFAP36       | 0.07  | 7.44  | 0.77  | 0.44345 |
| DENND6B      | 0.09  | 7.68  | 0.77  | 0.44346 |
| CRISP3       | -0.17 | 5.75  | -0.77 | 0.44346 |
| JDP2         | -0.10 | 9.31  | -0.77 | 0.44352 |

|            |       |       |       |         |
|------------|-------|-------|-------|---------|
| BORA       | -0.07 | 6.02  | -0.77 | 0.44353 |
| TRPV4      | -0.10 | 5.29  | -0.77 | 0.44358 |
| SLC4A1     | 0.25  | 12.09 | 0.77  | 0.44358 |
| TTPAL      | -0.06 | 7.83  | -0.77 | 0.44367 |
| IL1R2      | -0.21 | 9.94  | -0.77 | 0.44369 |
| RTL8A      | 0.07  | 7.78  | 0.77  | 0.44371 |
| C14orf93   | 0.05  | 8.23  | 0.77  | 0.44381 |
| AC069281.2 | -0.13 | 6.94  | -0.77 | 0.44384 |
| CDC42SE2   | -0.06 | 10.95 | -0.77 | 0.44427 |
| C15orf61   | 0.07  | 6.67  | 0.77  | 0.44438 |
| SMIM3      | -0.09 | 8.13  | -0.77 | 0.44472 |
| EHBP1L1    | -0.07 | 12.34 | -0.77 | 0.44475 |
| LINC00342  | -0.11 | 6.99  | -0.77 | 0.44480 |
| BTF3P10    | 0.10  | 6.18  | 0.77  | 0.44491 |
| L2HGDH     | 0.08  | 5.27  | 0.77  | 0.44502 |
| MEI1       | 0.08  | 8.61  | 0.77  | 0.44503 |
| EIF4G1     | -0.05 | 11.47 | -0.77 | 0.44504 |
| MTATP6P1   | -0.06 | 12.17 | -0.77 | 0.44506 |
| SDAD1P1    | 0.06  | 5.26  | 0.77  | 0.44511 |
| SLC9A8     | -0.11 | 10.00 | -0.77 | 0.44515 |
| INVS       | -0.06 | 6.71  | -0.77 | 0.44519 |
| EEF1A1P38  | 0.06  | 5.17  | 0.77  | 0.44532 |
| ANK3       | -0.10 | 6.29  | -0.77 | 0.44538 |
| AL353807.5 | -0.09 | 6.56  | -0.77 | 0.44554 |
| MTBP       | -0.08 | 5.01  | -0.77 | 0.44560 |
| ACOT4      | 0.09  | 5.48  | 0.77  | 0.44585 |
| AC130456.3 | 0.19  | 9.50  | 0.77  | 0.44599 |
| AP1S1      | 0.07  | 7.79  | 0.77  | 0.44602 |
| IRF2BP2    | -0.05 | 10.16 | -0.77 | 0.44610 |
| CD1C       | 0.09  | 8.02  | 0.77  | 0.44615 |
| AC093297.2 | -0.08 | 5.85  | -0.77 | 0.44622 |
| PSTK       | 0.07  | 5.64  | 0.77  | 0.44629 |
| MRAS       | -0.13 | 6.51  | -0.77 | 0.44631 |
| AL035411.1 | -0.09 | 5.30  | -0.77 | 0.44640 |
| ZNF559     | -0.08 | 7.01  | -0.77 | 0.44642 |
| OS9        | 0.07  | 12.94 | 0.77  | 0.44694 |
| ZNF35      | 0.08  | 6.19  | 0.77  | 0.44704 |
| POMP       | 0.07  | 8.59  | 0.77  | 0.44712 |
| AC092718.4 | 0.08  | 5.19  | 0.77  | 0.44714 |
| FAAH       | 0.11  | 7.70  | 0.77  | 0.44714 |
| KIAA1586   | -0.08 | 5.63  | -0.77 | 0.44714 |
| AF131215.6 | 0.09  | 6.45  | 0.77  | 0.44719 |
| IPPK       | -0.05 | 6.90  | -0.77 | 0.44719 |
| ZNF385A    | 0.11  | 11.05 | 0.77  | 0.44725 |
| POLE       | -0.05 | 9.14  | -0.77 | 0.44734 |
| SMYD3      | 0.07  | 6.89  | 0.77  | 0.44736 |
| SP110      | -0.09 | 11.06 | -0.77 | 0.44740 |
| AC026412.1 | 0.08  | 5.73  | 0.77  | 0.44753 |
| SLC25A29   | 0.15  | 8.65  | 0.77  | 0.44759 |
| KLHL28     | -0.08 | 6.64  | -0.76 | 0.44783 |

|            |       |       |       |         |
|------------|-------|-------|-------|---------|
| AC092747.4 | -0.07 | 6.04  | -0.76 | 0.44797 |
| TC2N       | -0.09 | 8.34  | -0.76 | 0.44802 |
| DCAF1      | -0.06 | 8.54  | -0.76 | 0.44819 |
| AC083862.3 | -0.11 | 6.36  | -0.76 | 0.44831 |
| IGLV7-46   | 0.18  | 6.23  | 0.76  | 0.44834 |
| GIT1       | 0.06  | 10.19 | 0.76  | 0.44836 |
| ARHGAP30   | 0.05  | 13.10 | 0.76  | 0.44851 |
| PRELID1    | 0.08  | 12.08 | 0.76  | 0.44861 |
| TPMT       | 0.07  | 7.51  | 0.76  | 0.44869 |
| ADSL       | 0.07  | 6.06  | 0.76  | 0.44891 |
| HROB       | -0.14 | 5.08  | -0.76 | 0.44903 |
| IGLJ2      | 0.12  | 5.35  | 0.76  | 0.44922 |
| UBTD1      | 0.10  | 7.74  | 0.76  | 0.44926 |
| NSMCE2     | 0.10  | 7.36  | 0.76  | 0.44928 |
| IST1       | -0.04 | 11.51 | -0.76 | 0.44930 |
| LIN7C      | -0.05 | 6.96  | -0.76 | 0.44939 |
| AC132942.1 | 0.06  | 5.12  | 0.76  | 0.44940 |
| ASPRV1     | -0.12 | 7.97  | -0.76 | 0.44944 |
| TMTC4      | -0.08 | 6.13  | -0.76 | 0.44947 |
| SIGLEC8    | 0.15  | 6.27  | 0.76  | 0.44970 |
| FAM71F2    | -0.13 | 6.15  | -0.76 | 0.44980 |
| AC007342.9 | 0.11  | 6.01  | 0.76  | 0.44988 |
| ZDHHHC23   | -0.08 | 5.52  | -0.76 | 0.45000 |
| CD200      | 0.12  | 5.78  | 0.76  | 0.45009 |
| EIF2A      | 0.05  | 9.35  | 0.76  | 0.45010 |
| LTA4H      | -0.07 | 11.34 | -0.76 | 0.45012 |
| IGHG3      | 0.25  | 9.55  | 0.76  | 0.45021 |
| GNPDA2     | -0.07 | 5.98  | -0.76 | 0.45050 |
| IGKV1D-13  | -0.19 | 5.35  | -0.76 | 0.45057 |
| AGPAT3     | -0.06 | 10.39 | -0.76 | 0.45064 |
| MTSS2      | -0.08 | 5.57  | -0.76 | 0.45076 |
| SLC2A6     | 0.10  | 9.33  | 0.76  | 0.45079 |
| ALG5       | -0.07 | 7.35  | -0.76 | 0.45079 |
| LINC01138  | -0.08 | 7.17  | -0.76 | 0.45098 |
| ADCY6      | -0.10 | 5.03  | -0.76 | 0.45099 |
| ATP5MC2P4  | 0.08  | 6.89  | 0.76  | 0.45113 |
| EIF1AY     | -0.39 | 7.63  | -0.76 | 0.45115 |
| AC100810.1 | 0.12  | 8.23  | 0.76  | 0.45115 |
| RSPH3      | -0.08 | 6.98  | -0.76 | 0.45122 |
| BORCS7     | 0.08  | 7.52  | 0.76  | 0.45127 |
| EVC2       | -0.09 | 5.14  | -0.76 | 0.45133 |
| SGSM2      | 0.07  | 9.71  | 0.76  | 0.45139 |
| NIBAN3     | 0.14  | 9.21  | 0.76  | 0.45143 |
| PLEKHN1    | 0.08  | 5.24  | 0.76  | 0.45143 |
| ANP32BP1   | 0.10  | 6.90  | 0.76  | 0.45149 |
| MMP17      | 0.13  | 6.80  | 0.76  | 0.45151 |
| TXNL1      | 0.05  | 8.97  | 0.76  | 0.45164 |
| ANO7L1     | 0.13  | 5.35  | 0.76  | 0.45166 |
| IGKV1-6    | 0.15  | 5.96  | 0.76  | 0.45172 |
| ADGRB1     | 0.09  | 5.39  | 0.76  | 0.45191 |

|            |       |       |       |         |
|------------|-------|-------|-------|---------|
| ABCD4      | 0.05  | 9.09  | 0.76  | 0.45210 |
| EDRF1      | -0.07 | 7.65  | -0.76 | 0.45244 |
| COX20      | -0.05 | 8.20  | -0.76 | 0.45256 |
| HCG11      | -0.07 | 7.26  | -0.76 | 0.45260 |
| TNFAIP8    | 0.05  | 10.02 | 0.76  | 0.45260 |
| TUBB6      | 0.14  | 7.46  | 0.76  | 0.45272 |
| RALBP1     | 0.10  | 10.79 | 0.76  | 0.45274 |
| IFT57      | 0.08  | 7.34  | 0.76  | 0.45276 |
| ADRB2      | -0.09 | 8.67  | -0.76 | 0.45300 |
| RGS14      | 0.08  | 11.71 | 0.76  | 0.45302 |
| BLOC1S5    | 0.07  | 7.46  | 0.76  | 0.45309 |
| AL049834.1 | 0.08  | 5.27  | 0.76  | 0.45320 |
| NSUN7      | -0.14 | 6.44  | -0.76 | 0.45330 |
| SCLY       | -0.09 | 5.37  | -0.76 | 0.45331 |
| POMZP3     | 0.13  | 7.03  | 0.76  | 0.45336 |
| CBR1       | -0.08 | 8.57  | -0.76 | 0.45343 |
| NCK1-DT    | 0.07  | 6.03  | 0.76  | 0.45347 |
| RABL2B     | 0.05  | 8.05  | 0.75  | 0.45372 |
| DNAJB12    | 0.05  | 10.20 | 0.75  | 0.45377 |
| HGF        | -0.08 | 5.82  | -0.75 | 0.45408 |
| TXNDC9     | -0.07 | 7.07  | -0.75 | 0.45413 |
| AL669831.1 | -0.13 | 8.05  | -0.75 | 0.45418 |
| AL034550.2 | 0.09  | 5.67  | 0.75  | 0.45431 |
| ZBTB8OSP2  | -0.06 | 5.00  | -0.75 | 0.45432 |
| EZR        | 0.06  | 11.54 | 0.75  | 0.45454 |
| SLF1       | 0.10  | 7.30  | 0.75  | 0.45482 |
| BAHCC1     | -0.09 | 6.12  | -0.75 | 0.45485 |
| ZNF561     | -0.06 | 7.45  | -0.75 | 0.45497 |
| NAP1L5     | 0.07  | 5.06  | 0.75  | 0.45498 |
| SWAP70     | -0.09 | 8.31  | -0.75 | 0.45501 |
| SMTN       | 0.07  | 6.41  | 0.75  | 0.45523 |
| KRT5       | -0.13 | 5.62  | -0.75 | 0.45531 |
| CDC42BPG   | 0.07  | 6.77  | 0.75  | 0.45538 |
| PRR5L      | -0.09 | 9.13  | -0.75 | 0.45544 |
| MT-CO2     | 0.07  | 15.13 | 0.75  | 0.45553 |
| PYGL       | -0.13 | 11.68 | -0.75 | 0.45555 |
| FADS2      | 0.21  | 8.17  | 0.75  | 0.45555 |
| SEMA4D     | -0.06 | 12.68 | -0.75 | 0.45559 |
| SSBP2      | -0.08 | 7.43  | -0.75 | 0.45567 |
| CRIP1P2    | 0.09  | 5.19  | 0.75  | 0.45582 |
| IL2RB      | -0.09 | 11.58 | -0.75 | 0.45586 |
| CCT5P1     | -0.06 | 5.27  | -0.75 | 0.45591 |
| IMPA1      | -0.09 | 6.54  | -0.75 | 0.45596 |
| ZNF696     | 0.06  | 7.03  | 0.75  | 0.45603 |
| NME2P1     | 0.10  | 6.20  | 0.75  | 0.45608 |
| RGPD2      | 0.10  | 5.39  | 0.75  | 0.45629 |
| PEX26      | 0.04  | 8.87  | 0.75  | 0.45647 |
| AL158050.1 | -0.08 | 5.32  | -0.75 | 0.45661 |
| PSMD2      | 0.04  | 10.82 | 0.75  | 0.45679 |
| CXCR6      | 0.11  | 7.34  | 0.75  | 0.45708 |

|            |       |       |       |         |
|------------|-------|-------|-------|---------|
| CLCN5      | -0.08 | 6.46  | -0.75 | 0.45722 |
| DNM1P47    | -0.10 | 5.06  | -0.75 | 0.45725 |
| PTS        | 0.07  | 5.65  | 0.75  | 0.45727 |
| BCL3       | 0.12  | 10.80 | 0.75  | 0.45740 |
| CCDC163    | -0.12 | 5.59  | -0.75 | 0.45748 |
| RPL21P44   | 0.13  | 5.85  | 0.75  | 0.45749 |
| FCER1A     | -0.15 | 8.66  | -0.75 | 0.45753 |
| ITGB2-AS1  | 0.12  | 10.75 | 0.75  | 0.45772 |
| MCOLN1     | 0.10  | 9.53  | 0.75  | 0.45786 |
| RCC2       | -0.05 | 10.62 | -0.75 | 0.45794 |
| RPL30P14   | 0.13  | 7.50  | 0.75  | 0.45801 |
| TMEM126A   | 0.06  | 7.02  | 0.75  | 0.45828 |
| CHRNE      | -0.11 | 6.47  | -0.75 | 0.45828 |
| FAM167A    | 0.14  | 5.73  | 0.75  | 0.45829 |
| C16orf91   | 0.08  | 6.94  | 0.75  | 0.45838 |
| ORC3       | -0.06 | 6.97  | -0.75 | 0.45844 |
| GTF2H2     | -0.11 | 5.72  | -0.75 | 0.45846 |
| SLTM       | 0.06  | 10.30 | 0.75  | 0.45846 |
| ZFP92      | 0.07  | 5.98  | 0.75  | 0.45847 |
| MILR1      | -0.10 | 7.13  | -0.75 | 0.45848 |
| RIC8A      | 0.04  | 11.03 | 0.75  | 0.45858 |
| SEPTIN7P7  | -0.09 | 4.95  | -0.75 | 0.45859 |
| RPL7AP66   | 0.10  | 6.98  | 0.75  | 0.45861 |
| F8A2       | -0.07 | 4.99  | -0.75 | 0.45867 |
| HEXB       | -0.06 | 9.93  | -0.75 | 0.45872 |
| RNF7       | 0.05  | 8.26  | 0.75  | 0.45880 |
| SCAP       | 0.05  | 10.89 | 0.75  | 0.45891 |
| SPEF2      | -0.07 | 5.85  | -0.75 | 0.45892 |
| MTND5P11   | -0.07 | 5.86  | -0.75 | 0.45899 |
| DNAJC24    | -0.08 | 6.26  | -0.75 | 0.45901 |
| PRR34-AS1  | 0.09  | 5.70  | 0.75  | 0.45920 |
| LY86       | 0.11  | 9.35  | 0.75  | 0.45922 |
| GLMP       | 0.09  | 8.92  | 0.75  | 0.45929 |
| SLC27A1    | 0.08  | 8.58  | 0.75  | 0.45946 |
| METTTL22   | -0.06 | 7.91  | -0.75 | 0.45953 |
| RPL13AP3   | 0.06  | 5.50  | 0.74  | 0.45966 |
| ZNF384     | -0.04 | 9.74  | -0.74 | 0.45969 |
| NADK2      | -0.06 | 6.45  | -0.74 | 0.45999 |
| RPS18P12   | 0.10  | 6.90  | 0.74  | 0.46003 |
| CLSTN3     | 0.08  | 10.18 | 0.74  | 0.46015 |
| MARCHF5    | -0.08 | 7.41  | -0.74 | 0.46021 |
| ATP10A     | -0.07 | 8.92  | -0.74 | 0.46025 |
| IGFBP2     | 0.17  | 5.09  | 0.74  | 0.46063 |
| SDHAF4     | -0.07 | 5.39  | -0.74 | 0.46065 |
| TMEM218    | -0.06 | 6.93  | -0.74 | 0.46072 |
| AC008481.1 | -0.08 | 5.80  | -0.74 | 0.46104 |
| AURKA      | -0.08 | 5.71  | -0.74 | 0.46108 |
| TCEA3      | 0.13  | 7.29  | 0.74  | 0.46121 |
| PARP3      | 0.07  | 7.53  | 0.74  | 0.46132 |
| XYLB       | -0.09 | 4.94  | -0.74 | 0.46140 |

|            |       |       |       |         |
|------------|-------|-------|-------|---------|
| AC096992.2 | -0.08 | 5.03  | -0.74 | 0.46158 |
| AC145207.5 | 0.06  | 6.13  | 0.74  | 0.46182 |
| COX7A2L    | 0.06  | 9.51  | 0.74  | 0.46193 |
| CCDC69     | 0.05  | 11.67 | 0.74  | 0.46195 |
| ILF3       | 0.05  | 11.78 | 0.74  | 0.46200 |
| DES11      | 0.04  | 9.05  | 0.74  | 0.46206 |
| DDOST      | 0.05  | 10.86 | 0.74  | 0.46209 |
| FAM83H     | 0.07  | 6.07  | 0.74  | 0.46213 |
| SAAL1      | 0.06  | 6.37  | 0.74  | 0.46235 |
| SESN3      | 0.09  | 9.17  | 0.74  | 0.46244 |
| MPO        | 0.21  | 8.16  | 0.74  | 0.46247 |
| LEXM       | -0.10 | 5.33  | -0.74 | 0.46255 |
| AC006205.2 | 0.15  | 5.14  | 0.74  | 0.46255 |
| MZB1       | 0.16  | 8.22  | 0.74  | 0.46257 |
| GHRLOS     | 0.11  | 5.47  | 0.74  | 0.46271 |
| CLEC11A    | -0.10 | 6.36  | -0.74 | 0.46284 |
| ZNF547     | -0.08 | 5.26  | -0.74 | 0.46298 |
| IGLV3-10   | 0.19  | 6.04  | 0.74  | 0.46301 |
| KLHDC2     | -0.06 | 8.30  | -0.74 | 0.46316 |
| AL356535.1 | 0.10  | 6.37  | 0.74  | 0.46319 |
| OSBP2      | 0.19  | 9.13  | 0.74  | 0.46329 |
| CASP17P    | -0.09 | 6.32  | -0.74 | 0.46331 |
| WASHC2C    | -0.05 | 9.29  | -0.74 | 0.46336 |
| TNFSF13    | -0.08 | 7.14  | -0.74 | 0.46353 |
| STOM       | -0.09 | 10.17 | -0.74 | 0.46355 |
| TFDP2      | 0.07  | 8.76  | 0.74  | 0.46368 |
| TMEM19     | 0.07  | 7.29  | 0.74  | 0.46378 |
| COQ10B     | -0.06 | 8.37  | -0.74 | 0.46388 |
| LINC02352  | -0.10 | 6.68  | -0.74 | 0.46392 |
| CCRL2      | -0.07 | 6.59  | -0.74 | 0.46394 |
| PLCG1      | 0.08  | 10.94 | 0.74  | 0.46395 |
| BBS9       | 0.05  | 6.88  | 0.74  | 0.46421 |
| NTN5       | 0.09  | 5.14  | 0.74  | 0.46422 |
| THOC7      | 0.08  | 8.16  | 0.74  | 0.46427 |
| BAIAP2     | 0.08  | 7.54  | 0.74  | 0.46428 |
| KARS1      | 0.06  | 10.97 | 0.74  | 0.46429 |
| CCT6P2     | -0.08 | 5.64  | -0.74 | 0.46439 |
| THUMPD2    | -0.09 | 6.12  | -0.74 | 0.46445 |
| AP000942.1 | 0.07  | 5.40  | 0.74  | 0.46451 |
| PTTG1      | 0.09  | 6.48  | 0.74  | 0.46465 |
| ZNF280D    | -0.07 | 6.25  | -0.74 | 0.46468 |
| MTA3       | 0.06  | 7.32  | 0.74  | 0.46474 |
| SRRM2      | -0.07 | 13.63 | -0.74 | 0.46477 |
| RNF166     | -0.07 | 11.29 | -0.74 | 0.46478 |
| FRMD8      | 0.05  | 10.11 | 0.74  | 0.46478 |
| PYROXD2    | -0.06 | 7.52  | -0.74 | 0.46478 |
| TMEM8B     | 0.06  | 7.40  | 0.74  | 0.46481 |
| PAX8       | -0.16 | 5.49  | -0.74 | 0.46482 |
| PRKCH      | -0.06 | 10.35 | -0.74 | 0.46512 |
| RO60       | -0.07 | 7.82  | -0.74 | 0.46518 |



|            |       |       |       |         |
|------------|-------|-------|-------|---------|
| DBNL       | 0.06  | 12.22 | 0.74  | 0.46541 |
| BAHD1      | 0.04  | 9.39  | 0.74  | 0.46551 |
| SPX        | 0.10  | 5.39  | 0.74  | 0.46562 |
| OSCAR      | 0.11  | 10.63 | 0.73  | 0.46571 |
| UQCRBP1    | 0.10  | 6.71  | 0.73  | 0.46571 |
| EIF2S2P3   | 0.08  | 5.13  | 0.73  | 0.46607 |
| TRDC       | -0.14 | 8.65  | -0.73 | 0.46610 |
| CCDC125    | -0.08 | 7.82  | -0.73 | 0.46622 |
| ALDOAP2    | 0.09  | 7.00  | 0.73  | 0.46624 |
| IRGQ       | 0.06  | 7.50  | 0.73  | 0.46628 |
| AC012467.2 | 0.07  | 5.96  | 0.73  | 0.46640 |
| PEX10      | 0.06  | 7.38  | 0.73  | 0.46651 |
| CDHR1      | 0.09  | 6.10  | 0.73  | 0.46651 |
| OGG1       | 0.06  | 8.70  | 0.73  | 0.46674 |
| MAFG       | 0.08  | 8.86  | 0.73  | 0.46678 |
| UBE2C      | -0.09 | 5.80  | -0.73 | 0.46691 |
| THEM5      | 0.12  | 5.02  | 0.73  | 0.46693 |
| ATP5F1CP1  | -0.09 | 5.82  | -0.73 | 0.46695 |
| DTYMK      | 0.09  | 7.86  | 0.73  | 0.46696 |
| DPY19L2P2  | -0.08 | 5.13  | -0.73 | 0.46696 |
| HCFC2      | -0.07 | 6.24  | -0.73 | 0.46704 |
| AL512378.1 | 0.14  | 5.28  | 0.73  | 0.46710 |
| GPR82      | -0.08 | 5.29  | -0.73 | 0.46726 |
| HSPA1A     | -0.09 | 10.81 | -0.73 | 0.46764 |
| CNR2       | 0.10  | 7.61  | 0.73  | 0.46765 |
| RPL41P5    | 0.10  | 8.37  | 0.73  | 0.46766 |
| ANKRD11    | 0.05  | 11.05 | 0.73  | 0.46770 |
| BCL11B     | 0.08  | 9.99  | 0.73  | 0.46773 |
| TCFL5      | -0.05 | 7.10  | -0.73 | 0.46775 |
| RAB20      | -0.13 | 7.77  | -0.73 | 0.46798 |
| RFX2       | -0.13 | 9.13  | -0.73 | 0.46808 |
| MYH9       | -0.07 | 14.87 | -0.73 | 0.46810 |
| AL450998.2 | -0.07 | 6.67  | -0.73 | 0.46812 |
| AL008727.1 | 0.09  | 5.00  | 0.73  | 0.46819 |
| SHCBP1     | -0.08 | 5.34  | -0.73 | 0.46840 |
| VSIG1      | 0.09  | 6.59  | 0.73  | 0.46847 |
| GALNS      | -0.07 | 9.11  | -0.73 | 0.46871 |
| TRAPPC12   | 0.05  | 9.71  | 0.73  | 0.46889 |
| IER2       | 0.06  | 11.45 | 0.73  | 0.46894 |
| CCT5       | -0.04 | 10.59 | -0.73 | 0.46897 |
| LINC00173  | -0.14 | 7.75  | -0.73 | 0.46918 |
| TOGARAM2   | -0.10 | 6.78  | -0.73 | 0.46921 |
| CLEC2L     | 0.13  | 5.70  | 0.73  | 0.46930 |
| ANKRD13D   | 0.08  | 11.81 | 0.73  | 0.46934 |
| AL139220.2 | 0.14  | 6.19  | 0.73  | 0.46943 |
| FUNDC2     | 0.08  | 9.48  | 0.73  | 0.46981 |
| AL513320.1 | 0.08  | 5.65  | 0.73  | 0.46983 |
| MRPL30     | -0.06 | 7.83  | -0.73 | 0.46989 |
| FAHD2A     | 0.07  | 7.45  | 0.73  | 0.46991 |
| MARVELD1   | -0.09 | 7.99  | -0.73 | 0.46996 |

|           |       |       |       |         |
|-----------|-------|-------|-------|---------|
| GSTM1     | -0.31 | 6.49  | -0.73 | 0.47002 |
| TSPAN32   | 0.07  | 9.55  | 0.73  | 0.47010 |
| UBAP2L    | -0.04 | 10.59 | -0.73 | 0.47012 |
| ATP5MC2P1 | 0.08  | 5.41  | 0.73  | 0.47027 |
| STYXL1    | 0.07  | 8.47  | 0.73  | 0.47048 |
| RAB33A    | 0.10  | 6.85  | 0.73  | 0.47053 |
| C14orf119 | 0.04  | 9.24  | 0.73  | 0.47088 |
| FANCC     | -0.07 | 6.18  | -0.73 | 0.47090 |
| ULK4      | 0.07  | 6.11  | 0.73  | 0.47092 |
| TOX4P1    | -0.09 | 5.24  | -0.73 | 0.47099 |
| MED10     | 0.05  | 8.85  | 0.73  | 0.47101 |
| DAB2IP    | -0.09 | 4.93  | -0.73 | 0.47122 |
| PNP       | 0.07  | 10.21 | 0.73  | 0.47126 |
| PLAAT3    | 0.10  | 7.44  | 0.73  | 0.47126 |
| MST1      | -0.08 | 5.97  | -0.73 | 0.47134 |
| RBM41     | 0.07  | 6.21  | 0.73  | 0.47135 |
| ACP2      | 0.07  | 8.99  | 0.73  | 0.47139 |
| VSIG4     | -0.17 | 6.53  | -0.73 | 0.47158 |
| ZNF141    | -0.08 | 6.96  | -0.72 | 0.47177 |
| LINC00339 | -0.08 | 6.70  | -0.72 | 0.47194 |
| BRF2      | 0.04  | 7.83  | 0.72  | 0.47195 |
| HSBP1L1   | 0.09  | 6.51  | 0.72  | 0.47207 |
| PPP5C     | 0.05  | 9.00  | 0.72  | 0.47231 |
| C16orf70  | -0.05 | 8.76  | -0.72 | 0.47239 |
| ATRAID    | 0.06  | 9.69  | 0.72  | 0.47241 |
| RBX1      | 0.06  | 9.31  | 0.72  | 0.47261 |
| UBE2K     | -0.05 | 8.61  | -0.72 | 0.47262 |
| DDB2      | -0.06 | 8.62  | -0.72 | 0.47268 |
| ECE1      | -0.09 | 11.94 | -0.72 | 0.47274 |
| HOXC4     | 0.10  | 5.54  | 0.72  | 0.47280 |
| NAIF1     | 0.04  | 8.05  | 0.72  | 0.47297 |
| LARS2     | -0.05 | 7.69  | -0.72 | 0.47308 |
| EEPD1     | 0.08  | 9.33  | 0.72  | 0.47310 |
| TAF13     | -0.06 | 6.48  | -0.72 | 0.47311 |
| SP140     | -0.07 | 9.51  | -0.72 | 0.47332 |
| BTF3P12   | 0.07  | 5.61  | 0.72  | 0.47333 |
| ZCCHC18   | 0.07  | 5.51  | 0.72  | 0.47333 |
| BANP      | 0.05  | 9.29  | 0.72  | 0.47334 |
| MT-CO3    | 0.07  | 15.10 | 0.72  | 0.47340 |
| LARGE2    | 0.09  | 6.97  | 0.72  | 0.47355 |
| APBB1IP   | -0.08 | 11.95 | -0.72 | 0.47362 |
| RRAS2     | -0.08 | 6.45  | -0.72 | 0.47364 |
| ZBTB22    | 0.05  | 8.61  | 0.72  | 0.47366 |
| LAT2      | -0.08 | 11.74 | -0.72 | 0.47397 |
| PERP      | 0.07  | 5.62  | 0.72  | 0.47398 |
| SLC39A11  | -0.06 | 7.92  | -0.72 | 0.47399 |
| USP30-AS1 | 0.09  | 6.25  | 0.72  | 0.47407 |
| MMP8      | -0.19 | 6.06  | -0.72 | 0.47409 |
| SLC46A1   | -0.08 | 6.29  | -0.72 | 0.47413 |
| UBC       | 0.06  | 14.08 | 0.72  | 0.47424 |

|            |       |       |       |         |
|------------|-------|-------|-------|---------|
| EWSR1      | 0.04  | 11.55 | 0.72  | 0.47424 |
| ZNF32      | 0.07  | 8.04  | 0.72  | 0.47441 |
| TM2D1      | 0.05  | 7.11  | 0.72  | 0.47450 |
| AC073264.3 | -0.09 | 4.93  | -0.72 | 0.47455 |
| TDP1       | 0.06  | 8.27  | 0.72  | 0.47456 |
| SNX29      | -0.05 | 9.50  | -0.72 | 0.47478 |
| NKIRAS2    | 0.05  | 9.59  | 0.72  | 0.47485 |
| AL360181.2 | -0.09 | 5.28  | -0.72 | 0.47494 |
| MICAL2     | -0.12 | 10.84 | -0.72 | 0.47501 |
| TG         | -0.10 | 5.02  | -0.72 | 0.47512 |
| LINC02680  | 0.11  | 5.05  | 0.72  | 0.47513 |
| BATF3      | -0.10 | 6.73  | -0.72 | 0.47531 |
| NAA20      | 0.05  | 7.69  | 0.72  | 0.47540 |
| AC098614.3 | -0.08 | 5.63  | -0.72 | 0.47552 |
| HMGN2P3    | 0.09  | 6.47  | 0.72  | 0.47555 |
| ZCCHC3     | 0.03  | 9.07  | 0.72  | 0.47567 |
| BOK        | -0.15 | 5.98  | -0.72 | 0.47571 |
| CD14       | 0.10  | 13.35 | 0.72  | 0.47584 |
| PSAP       | -0.07 | 15.67 | -0.72 | 0.47593 |
| PLCD1      | 0.05  | 8.63  | 0.72  | 0.47595 |
| MAK16      | -0.06 | 6.87  | -0.72 | 0.47595 |
| SYNJ2BP    | -0.06 | 6.78  | -0.72 | 0.47596 |
| AL513343.1 | 0.09  | 5.16  | 0.72  | 0.47601 |
| MARS1      | -0.05 | 10.88 | -0.72 | 0.47615 |
| LYPD2      | -0.21 | 6.70  | -0.72 | 0.47632 |
| SETDB1     | -0.03 | 9.95  | -0.72 | 0.47638 |
| UBA52P5    | 0.11  | 8.11  | 0.72  | 0.47659 |
| CLN3       | -0.06 | 7.00  | -0.72 | 0.47662 |
| ORC4       | -0.06 | 7.13  | -0.72 | 0.47693 |
| TP53INP2   | -0.12 | 8.21  | -0.72 | 0.47702 |
| YWHAB      | 0.06  | 12.64 | 0.72  | 0.47706 |
| TNPO3      | -0.05 | 9.81  | -0.72 | 0.47708 |
| RPSAP8     | 0.07  | 5.48  | 0.72  | 0.47711 |
| AC124944.2 | -0.09 | 4.95  | -0.72 | 0.47712 |
| RPS17P2    | -0.11 | 6.10  | -0.72 | 0.47731 |
| OPA3       | 0.05  | 8.22  | 0.72  | 0.47754 |
| DDX18      | -0.06 | 9.23  | -0.72 | 0.47765 |
| RBM45      | -0.07 | 6.32  | -0.72 | 0.47771 |
| AC111170.4 | 0.11  | 5.92  | 0.72  | 0.47775 |
| TEX10      | 0.06  | 7.40  | 0.72  | 0.47775 |
| PSMA5      | 0.06  | 9.51  | 0.72  | 0.47776 |
| TMEM214    | 0.04  | 10.27 | 0.71  | 0.47788 |
| LRRC3      | 0.09  | 5.88  | 0.71  | 0.47790 |
| TIMM8A     | -0.07 | 5.74  | -0.71 | 0.47809 |
| LTBP1      | -0.13 | 6.61  | -0.71 | 0.47845 |
| AC090517.5 | -0.08 | 4.96  | -0.71 | 0.47870 |
| LDHD       | 0.10  | 5.61  | 0.71  | 0.47885 |
| HOTAIRM1   | -0.11 | 6.43  | -0.71 | 0.47892 |
| KPTN       | -0.09 | 7.38  | -0.71 | 0.47897 |
| HLTF       | -0.08 | 6.21  | -0.71 | 0.47915 |

|             |       |       |       |         |
|-------------|-------|-------|-------|---------|
| COPS4       | 0.06  | 8.02  | 0.71  | 0.47942 |
| SLC16A3     | 0.09  | 11.97 | 0.71  | 0.47943 |
| HLA-S       | 0.09  | 5.20  | 0.71  | 0.47946 |
| APMAP       | -0.11 | 11.91 | -0.71 | 0.47953 |
| C1QB        | -0.17 | 6.38  | -0.71 | 0.47961 |
| UTY         | -0.28 | 6.81  | -0.71 | 0.47969 |
| RPS4XP14    | 0.10  | 6.28  | 0.71  | 0.47987 |
| MAP1LC3B    | -0.07 | 10.44 | -0.71 | 0.47988 |
| AC103988.1  | -0.07 | 5.39  | -0.71 | 0.48026 |
| RNF11       | -0.12 | 9.33  | -0.71 | 0.48028 |
| LRFN1       | 0.08  | 8.52  | 0.71  | 0.48028 |
| TRBV12-5    | 0.10  | 5.19  | 0.71  | 0.48031 |
| ZDHHC24     | 0.05  | 8.07  | 0.71  | 0.48032 |
| AC096677.1  | 0.07  | 5.97  | 0.71  | 0.48034 |
| NFX1        | 0.05  | 9.19  | 0.71  | 0.48038 |
| DOK3        | -0.11 | 12.20 | -0.71 | 0.48047 |
| C12orf73    | 0.07  | 6.03  | 0.71  | 0.48057 |
| RPL31P11    | 0.06  | 5.25  | 0.71  | 0.48069 |
| IGLC2       | 0.21  | 11.35 | 0.71  | 0.48096 |
| SNX3        | -0.08 | 10.34 | -0.71 | 0.48104 |
| PDE6D       | 0.05  | 8.04  | 0.71  | 0.48107 |
| BNIP1       | -0.09 | 5.61  | -0.71 | 0.48112 |
| CLK3        | 0.04  | 10.49 | 0.71  | 0.48129 |
| TRAV38-2DV8 | 0.10  | 6.12  | 0.71  | 0.48137 |
| AC006942.1  | 0.09  | 5.07  | 0.71  | 0.48164 |
| ALDOAP1     | 0.06  | 6.41  | 0.71  | 0.48190 |
| TWINK       | 0.07  | 7.62  | 0.71  | 0.48191 |
| PDIA3P1     | -0.09 | 7.58  | -0.71 | 0.48201 |
| RAMAC       | -0.07 | 7.57  | -0.71 | 0.48204 |
| KLF3-AS1    | -0.10 | 5.50  | -0.71 | 0.48216 |
| AL022328.4  | 0.09  | 5.53  | 0.71  | 0.48249 |
| NSFL1C      | 0.07  | 10.62 | 0.71  | 0.48255 |
| PIGS        | 0.04  | 10.21 | 0.71  | 0.48284 |
| ANK1        | 0.17  | 9.12  | 0.71  | 0.48292 |
| MTND2P28    | -0.11 | 10.32 | -0.71 | 0.48302 |
| TMEM259     | 0.06  | 11.38 | 0.71  | 0.48312 |
| TBC1D20     | -0.03 | 9.36  | -0.71 | 0.48318 |
| HLA-DRB5    | -0.19 | 11.53 | -0.71 | 0.48327 |
| KIR2DL1     | -0.14 | 6.63  | -0.71 | 0.48331 |
| LINC00954   | 0.13  | 6.60  | 0.71  | 0.48332 |
| AL158071.3  | 0.11  | 5.27  | 0.71  | 0.48336 |
| ARRB1       | -0.06 | 10.69 | -0.71 | 0.48347 |
| IARS1       | -0.06 | 8.65  | -0.71 | 0.48350 |
| CLIP2       | 0.06  | 8.55  | 0.71  | 0.48358 |
| HILPDA      | 0.08  | 5.54  | 0.71  | 0.48386 |
| PNKD        | 0.07  | 9.79  | 0.71  | 0.48387 |
| AC020898.1  | 0.08  | 5.96  | 0.71  | 0.48388 |
| CYP2D7      | -0.11 | 6.88  | -0.71 | 0.48391 |
| RELT        | -0.08 | 10.07 | -0.70 | 0.48400 |
| CARF        | -0.07 | 5.71  | -0.70 | 0.48402 |

|              |       |       |       |         |
|--------------|-------|-------|-------|---------|
| FBXL13       | -0.10 | 5.60  | -0.70 | 0.48402 |
| STAMBPL1     | 0.07  | 6.99  | 0.70  | 0.48414 |
| HACL1        | -0.05 | 7.76  | -0.70 | 0.48415 |
| ZNF260       | -0.07 | 6.27  | -0.70 | 0.48426 |
| KCTD10       | -0.05 | 9.00  | -0.70 | 0.48438 |
| SNHG20       | 0.07  | 6.47  | 0.70  | 0.48462 |
| NDC1         | 0.06  | 6.82  | 0.70  | 0.48470 |
| ARL13B       | -0.07 | 5.46  | -0.70 | 0.48497 |
| IGHG4        | 0.20  | 8.35  | 0.70  | 0.48499 |
| COA6-AS1     | -0.09 | 5.39  | -0.70 | 0.48505 |
| CDH23        | -0.07 | 9.49  | -0.70 | 0.48510 |
| COL18A1      | 0.16  | 9.39  | 0.70  | 0.48516 |
| ITSN1        | -0.10 | 6.55  | -0.70 | 0.48531 |
| MAN2B2       | -0.05 | 10.45 | -0.70 | 0.48540 |
| DDB1         | 0.04  | 11.34 | 0.70  | 0.48566 |
| PISD         | -0.10 | 11.32 | -0.70 | 0.48571 |
| CRADD        | -0.06 | 6.67  | -0.70 | 0.48572 |
| MTFR2        | -0.08 | 4.98  | -0.70 | 0.48572 |
| CCDC6        | 0.05  | 8.18  | 0.70  | 0.48604 |
| TBL2         | -0.05 | 7.97  | -0.70 | 0.48608 |
| RFX7         | -0.08 | 7.04  | -0.70 | 0.48614 |
| LBX2-AS1     | 0.09  | 6.33  | 0.70  | 0.48624 |
| CABP4        | -0.07 | 5.20  | -0.70 | 0.48634 |
| LYRM2        | 0.06  | 8.07  | 0.70  | 0.48650 |
| RCCD1        | 0.07  | 6.22  | 0.70  | 0.48679 |
| ZNF623       | -0.05 | 7.37  | -0.70 | 0.48703 |
| MAP11        | -0.08 | 10.12 | -0.70 | 0.48727 |
| CEBPE        | 0.11  | 7.32  | 0.70  | 0.48753 |
| AP001372.2   | 0.07  | 5.55  | 0.70  | 0.48756 |
| MYNN         | -0.06 | 6.92  | -0.70 | 0.48769 |
| UBE2B        | -0.09 | 9.48  | -0.70 | 0.48770 |
| ABHD17AP3    | -0.06 | 5.12  | -0.70 | 0.48785 |
| RMI2         | -0.09 | 5.63  | -0.70 | 0.48795 |
| AC243960.1   | 0.08  | 7.98  | 0.70  | 0.48797 |
| NCAPD2P1     | -0.08 | 5.03  | -0.70 | 0.48809 |
| TRMT112P6    | 0.08  | 6.32  | 0.70  | 0.48831 |
| MAPKAPK5-AS1 | 0.06  | 7.80  | 0.70  | 0.48836 |
| SLC44A1      | -0.06 | 8.07  | -0.70 | 0.48838 |
| BDH2         | -0.06 | 6.08  | -0.70 | 0.48840 |
| RAB28        | -0.05 | 6.85  | -0.70 | 0.48841 |
| RNF145       | -0.05 | 9.86  | -0.70 | 0.48843 |
| SS18L2       | 0.06  | 8.44  | 0.70  | 0.48855 |
| STARD5       | -0.07 | 6.07  | -0.70 | 0.48857 |
| RNF115       | 0.05  | 8.52  | 0.70  | 0.48863 |
| TNFRSF21     | -0.11 | 5.27  | -0.70 | 0.48868 |
| WTAP         | -0.05 | 10.19 | -0.70 | 0.48910 |
| NOL11        | -0.06 | 7.92  | -0.70 | 0.48928 |
| AC104964.4   | -0.08 | 4.98  | -0.70 | 0.48933 |
| RRP12        | -0.09 | 10.35 | -0.70 | 0.48943 |
| SFXN3        | -0.05 | 9.12  | -0.70 | 0.48957 |

|            |       |       |       |         |
|------------|-------|-------|-------|---------|
| LINC00680  | 0.09  | 6.29  | 0.70  | 0.48965 |
| DBF4B      | -0.08 | 6.58  | -0.70 | 0.48965 |
| FUT4       | -0.06 | 6.79  | -0.70 | 0.48970 |
| ADCY3      | 0.06  | 8.14  | 0.70  | 0.49008 |
| AP1G2      | 0.06  | 11.45 | 0.69  | 0.49040 |
| TMEM53     | 0.07  | 6.35  | 0.69  | 0.49064 |
| FBF1       | 0.06  | 6.76  | 0.69  | 0.49081 |
| C5orf24    | -0.05 | 6.87  | -0.69 | 0.49086 |
| NAP1L4P1   | -0.07 | 5.25  | -0.69 | 0.49089 |
| CNOT3      | 0.05  | 10.50 | 0.69  | 0.49095 |
| CIITA      | -0.09 | 10.31 | -0.69 | 0.49097 |
| TARBP1     | -0.07 | 7.54  | -0.69 | 0.49105 |
| VDAC2      | 0.04  | 9.10  | 0.69  | 0.49130 |
| RPL10P1    | 0.06  | 5.57  | 0.69  | 0.49150 |
| AL390066.2 | 0.11  | 6.27  | 0.69  | 0.49152 |
| RPS24P8    | 0.10  | 7.30  | 0.69  | 0.49170 |
| ZNF703     | 0.11  | 7.88  | 0.69  | 0.49177 |
| ZNF197     | -0.05 | 6.82  | -0.69 | 0.49178 |
| DXO        | 0.07  | 7.89  | 0.69  | 0.49178 |
| ZNF101     | 0.06  | 9.00  | 0.69  | 0.49199 |
| MIS18A     | 0.07  | 6.49  | 0.69  | 0.49200 |
| RPS6KA2    | 0.05  | 7.03  | 0.69  | 0.49238 |
| FNTB       | 0.07  | 7.19  | 0.69  | 0.49242 |
| METTL23    | 0.06  | 7.41  | 0.69  | 0.49244 |
| ADGRA3     | 0.10  | 5.21  | 0.69  | 0.49244 |
| GIPR       | 0.10  | 6.15  | 0.69  | 0.49253 |
| FOXD2-AS1  | -0.06 | 6.90  | -0.69 | 0.49270 |
| AL357079.1 | -0.09 | 5.06  | -0.69 | 0.49274 |
| UBE2N      | -0.05 | 8.96  | -0.69 | 0.49277 |
| PAICS      | 0.06  | 7.77  | 0.69  | 0.49281 |
| DHRS13     | 0.12  | 9.05  | 0.69  | 0.49327 |
| CACNA2D4   | 0.06  | 8.18  | 0.69  | 0.49350 |
| AC016394.4 | -0.08 | 5.08  | -0.69 | 0.49350 |
| RNF157     | 0.09  | 8.82  | 0.69  | 0.49360 |
| MSANTD2    | -0.07 | 6.14  | -0.69 | 0.49370 |
| C9orf85    | 0.07  | 6.86  | 0.69  | 0.49372 |
| RPP25      | 0.07  | 6.95  | 0.69  | 0.49399 |
| IGKV1-8    | -0.12 | 5.88  | -0.69 | 0.49403 |
| AC005480.2 | 0.06  | 5.11  | 0.69  | 0.49417 |
| CACNB1     | 0.07  | 7.04  | 0.69  | 0.49427 |
| NELFCD     | 0.04  | 9.81  | 0.69  | 0.49427 |
| CTLA4      | 0.10  | 6.41  | 0.69  | 0.49431 |
| STYX       | -0.07 | 7.50  | -0.69 | 0.49438 |
| ZNF346     | 0.06  | 7.96  | 0.69  | 0.49440 |
| AC242988.2 | 0.09  | 5.77  | 0.69  | 0.49443 |
| CDKN2B     | 0.08  | 5.40  | 0.69  | 0.49461 |
| ZSCAN21    | 0.06  | 7.00  | 0.69  | 0.49461 |
| BUD13      | 0.04  | 8.44  | 0.69  | 0.49466 |
| PLXND1     | -0.07 | 10.66 | -0.69 | 0.49487 |
| SREBF1     | -0.06 | 9.80  | -0.69 | 0.49494 |

|            |       |       |       |         |
|------------|-------|-------|-------|---------|
| LINC01801  | 0.08  | 5.10  | 0.69  | 0.49508 |
| RAPGEFL1   | 0.11  | 7.32  | 0.69  | 0.49534 |
| RNF144A    | -0.08 | 7.51  | -0.69 | 0.49550 |
| P2RY6      | -0.14 | 5.81  | -0.69 | 0.49556 |
| OAZ2       | -0.07 | 11.43 | -0.69 | 0.49574 |
| EEF1AKMT2  | 0.06  | 5.71  | 0.69  | 0.49590 |
| ADGRE5     | -0.09 | 14.56 | -0.69 | 0.49593 |
| GCSAM      | 0.08  | 7.28  | 0.69  | 0.49603 |
| ISG20      | -0.09 | 11.45 | -0.69 | 0.49617 |
| CAMK1      | 0.09  | 8.84  | 0.69  | 0.49624 |
| PER3       | -0.08 | 6.09  | -0.68 | 0.49643 |
| EIF4A2P4   | -0.11 | 5.98  | -0.68 | 0.49645 |
| GOLGA2P10  | -0.09 | 5.72  | -0.68 | 0.49660 |
| POMT2      | 0.08  | 6.80  | 0.68  | 0.49673 |
| CDKN2C     | 0.06  | 6.51  | 0.68  | 0.49676 |
| FAM86EP    | 0.08  | 5.36  | 0.68  | 0.49696 |
| PLEKHG1    | -0.09 | 5.97  | -0.68 | 0.49696 |
| SSTR3      | 0.12  | 6.86  | 0.68  | 0.49710 |
| SLC25A34   | 0.07  | 5.49  | 0.68  | 0.49737 |
| LINC01215  | -0.09 | 6.74  | -0.68 | 0.49738 |
| FOXRED2    | 0.07  | 6.20  | 0.68  | 0.49750 |
| ZNF235     | -0.06 | 5.95  | -0.68 | 0.49763 |
| TRIM69     | -0.07 | 9.32  | -0.68 | 0.49784 |
| IGLV4-69   | 0.16  | 6.89  | 0.68  | 0.49794 |
| ZNF665     | 0.07  | 5.50  | 0.68  | 0.49797 |
| ZNF669     | -0.07 | 6.04  | -0.68 | 0.49814 |
| ZRANB2     | -0.07 | 8.17  | -0.68 | 0.49851 |
| USP40      | 0.06  | 7.75  | 0.68  | 0.49885 |
| CLEC4C     | -0.11 | 5.42  | -0.68 | 0.49888 |
| BAG2       | 0.07  | 5.91  | 0.68  | 0.49903 |
| ZRANB3     | -0.06 | 5.28  | -0.68 | 0.49905 |
| DENND10P1  | -0.10 | 5.44  | -0.68 | 0.49925 |
| CARD8-AS1  | -0.06 | 8.22  | -0.68 | 0.49935 |
| IGHJ3      | 0.12  | 6.29  | 0.68  | 0.49959 |
| PER2       | -0.08 | 6.79  | -0.68 | 0.49967 |
| IFITM2     | -0.14 | 14.60 | -0.68 | 0.49969 |
| SF3A1      | -0.04 | 11.65 | -0.68 | 0.49989 |
| RARA       | -0.08 | 11.84 | -0.68 | 0.50010 |
| LINC01730  | -0.11 | 5.05  | -0.68 | 0.50023 |
| FAM131A    | -0.05 | 8.05  | -0.68 | 0.50028 |
| PDE1B      | 0.07  | 7.59  | 0.68  | 0.50031 |
| PEX13      | 0.06  | 6.48  | 0.68  | 0.50035 |
| AC005261.1 | -0.07 | 6.67  | -0.68 | 0.50037 |
| LCAT       | 0.08  | 7.47  | 0.68  | 0.50042 |
| LTC4S      | 0.07  | 6.07  | 0.68  | 0.50044 |
| NPR2       | -0.09 | 5.71  | -0.68 | 0.50054 |
| AC136475.1 | -0.12 | 6.32  | -0.68 | 0.50057 |
| BRD7       | -0.04 | 9.36  | -0.68 | 0.50109 |
| ERP27      | -0.09 | 6.22  | -0.68 | 0.50127 |
| TOGARAM1   | -0.08 | 6.12  | -0.68 | 0.50134 |

|            |       |       |       |         |
|------------|-------|-------|-------|---------|
| AP002784.2 | -0.10 | 7.89  | -0.68 | 0.50137 |
| COA1       | -0.06 | 8.32  | -0.68 | 0.50139 |
| SUV39H2    | -0.06 | 5.08  | -0.68 | 0.50140 |
| COX6B1P1   | 0.09  | 5.93  | 0.68  | 0.50155 |
| RAB13      | -0.08 | 5.22  | -0.68 | 0.50161 |
| PLXNA1     | 0.07  | 7.54  | 0.68  | 0.50162 |
| CCR4       | -0.08 | 7.56  | -0.68 | 0.50174 |
| AC068760.1 | 0.09  | 5.14  | 0.68  | 0.50177 |
| RPSAP36    | 0.09  | 5.16  | 0.68  | 0.50178 |
| UBAC1      | 0.05  | 9.66  | 0.68  | 0.50180 |
| Z97192.3   | 0.08  | 5.28  | 0.68  | 0.50184 |
| ACTG1P2    | 0.09  | 5.63  | 0.68  | 0.50188 |
| CITED2     | -0.04 | 9.75  | -0.68 | 0.50189 |
| SCNM1      | 0.06  | 9.68  | 0.68  | 0.50190 |
| RPL41P1    | 0.09  | 7.14  | 0.68  | 0.50218 |
| BEX4       | 0.05  | 7.80  | 0.68  | 0.50220 |
| COX6A1P2   | 0.09  | 6.73  | 0.68  | 0.50229 |
| USP31      | 0.05  | 6.13  | 0.68  | 0.50234 |
| BANF1P3    | 0.07  | 5.39  | 0.68  | 0.50237 |
| LINC02193  | -0.09 | 5.27  | -0.68 | 0.50250 |
| ABHD18     | 0.07  | 7.33  | 0.68  | 0.50263 |
| GGPS1      | 0.06  | 7.44  | 0.68  | 0.50267 |
| ARID4A     | 0.09  | 8.95  | 0.68  | 0.50268 |
| ANXA1      | -0.05 | 11.76 | -0.67 | 0.50278 |
| SKIV2L     | 0.05  | 10.25 | 0.67  | 0.50287 |
| PGS1       | -0.11 | 10.17 | -0.67 | 0.50327 |
| RHOB       | -0.08 | 10.13 | -0.67 | 0.50337 |
| HOXB4      | 0.08  | 6.28  | 0.67  | 0.50365 |
| SLC35B1    | 0.04  | 8.53  | 0.67  | 0.50373 |
| MAPKAPK3   | -0.06 | 11.21 | -0.67 | 0.50379 |
| SLC25A17   | -0.06 | 7.22  | -0.67 | 0.50380 |
| YBX1P1     | 0.09  | 8.51  | 0.67  | 0.50393 |
| AC055822.1 | 0.08  | 5.73  | 0.67  | 0.50403 |
| MT1L       | -0.09 | 4.90  | -0.67 | 0.50403 |
| DENND2B    | 0.09  | 5.17  | 0.67  | 0.50404 |
| ANKRD34A   | 0.06  | 5.80  | 0.67  | 0.50408 |
| NPRL3      | 0.13  | 11.68 | 0.67  | 0.50416 |
| SCFD1      | -0.05 | 8.34  | -0.67 | 0.50421 |
| PTCH1      | -0.08 | 7.67  | -0.67 | 0.50423 |
| ARHGDIB    | 0.06  | 14.48 | 0.67  | 0.50427 |
| YPEL3      | 0.09  | 12.81 | 0.67  | 0.50438 |
| LUC7L2     | 0.04  | 8.08  | 0.67  | 0.50441 |
| CCNK       | -0.04 | 9.91  | -0.67 | 0.50462 |
| NR4A2      | -0.08 | 5.50  | -0.67 | 0.50463 |
| LTO1       | -0.05 | 8.14  | -0.67 | 0.50465 |
| TEX30      | -0.06 | 5.84  | -0.67 | 0.50477 |
| FAM151B    | 0.08  | 4.99  | 0.67  | 0.50484 |
| IGFLR1     | -0.09 | 7.50  | -0.67 | 0.50485 |
| AC241585.1 | 0.08  | 5.20  | 0.67  | 0.50504 |
| KBTBD3     | 0.07  | 5.61  | 0.67  | 0.50515 |



|            |       |       |       |         |
|------------|-------|-------|-------|---------|
| WDR6       | 0.05  | 10.94 | 0.67  | 0.50524 |
| TLE1       | 0.08  | 7.68  | 0.67  | 0.50529 |
| GSPT1      | 0.12  | 10.73 | 0.67  | 0.50530 |
| HIBCH      | -0.06 | 6.36  | -0.67 | 0.50542 |
| RAB32      | -0.08 | 9.23  | -0.67 | 0.50548 |
| TP53       | 0.05  | 10.27 | 0.67  | 0.50548 |
| H1-0       | -0.10 | 8.72  | -0.67 | 0.50576 |
| TBP        | -0.04 | 7.55  | -0.67 | 0.50584 |
| TRBV12-3   | 0.09  | 6.72  | 0.67  | 0.50600 |
| POLDIP3    | 0.03  | 11.00 | 0.67  | 0.50602 |
| BIN3       | 0.07  | 9.98  | 0.67  | 0.50607 |
| PLOD3      | 0.05  | 9.83  | 0.67  | 0.50616 |
| DDX19A     | 0.06  | 7.88  | 0.67  | 0.50618 |
| AC012085.1 | -0.08 | 6.19  | -0.67 | 0.50658 |
| MRPL18     | -0.04 | 8.56  | -0.67 | 0.50665 |
| ASCL2      | -0.09 | 7.30  | -0.67 | 0.50666 |
| NUP37      | 0.05  | 6.88  | 0.67  | 0.50678 |
| UBBP1      | -0.10 | 5.73  | -0.67 | 0.50692 |
| FDX1       | 0.07  | 6.97  | 0.67  | 0.50699 |
| MEAF6      | 0.04  | 8.88  | 0.67  | 0.50703 |
| IL16       | 0.03  | 12.63 | 0.67  | 0.50709 |
| SLC12A4    | -0.05 | 8.47  | -0.67 | 0.50718 |
| AC022400.8 | 0.08  | 7.27  | 0.67  | 0.50730 |
| VNN2       | -0.13 | 12.32 | -0.67 | 0.50741 |
| ITGA1      | -0.08 | 5.41  | -0.67 | 0.50760 |
| CABP5      | 0.09  | 6.49  | 0.67  | 0.50796 |
| MIR320E    | 0.12  | 5.53  | 0.67  | 0.50797 |
| SIN3A      | -0.04 | 10.27 | -0.67 | 0.50811 |
| COTL1P2    | -0.07 | 5.36  | -0.67 | 0.50813 |
| ZNF66      | -0.10 | 5.16  | -0.67 | 0.50818 |
| ARPC5      | -0.06 | 11.71 | -0.67 | 0.50847 |
| ABHD6      | 0.05  | 7.34  | 0.67  | 0.50867 |
| KIAA1257   | -0.09 | 6.70  | -0.67 | 0.50876 |
| DNTTIP1    | 0.07  | 10.07 | 0.67  | 0.50881 |
| PXMP4      | 0.05  | 7.56  | 0.66  | 0.50909 |
| LRRC59     | -0.05 | 9.48  | -0.66 | 0.50926 |
| NALT1      | -0.08 | 5.42  | -0.66 | 0.50950 |
| LMNTD2     | 0.09  | 6.31  | 0.66  | 0.50963 |
| LAPTM4B    | 0.07  | 6.27  | 0.66  | 0.50963 |
| AC022167.2 | 0.07  | 6.57  | 0.66  | 0.50981 |
| LGALS4     | 0.07  | 5.15  | 0.66  | 0.50990 |
| CFAP70     | -0.08 | 5.24  | -0.66 | 0.51007 |
| CES1P1     | -0.10 | 5.08  | -0.66 | 0.51028 |
| TRAV12-2   | 0.12  | 6.50  | 0.66  | 0.51049 |
| RNPS1P1    | 0.07  | 6.22  | 0.66  | 0.51053 |
| DEGS2      | 0.10  | 5.32  | 0.66  | 0.51054 |
| KLHDC8B    | -0.10 | 7.88  | -0.66 | 0.51056 |
| CLEC4F     | -0.17 | 5.44  | -0.66 | 0.51063 |
| NIPA1      | -0.06 | 7.05  | -0.66 | 0.51072 |
| STAP2      | 0.07  | 5.16  | 0.66  | 0.51077 |

|            |       |       |       |         |
|------------|-------|-------|-------|---------|
| GLYR1      | -0.04 | 10.72 | -0.66 | 0.51088 |
| TRBV25-1   | 0.10  | 5.35  | 0.66  | 0.51092 |
| WHRN       | 0.09  | 6.51  | 0.66  | 0.51104 |
| ZNF316     | 0.06  | 9.97  | 0.66  | 0.51110 |
| MIOS       | -0.05 | 7.79  | -0.66 | 0.51120 |
| ANKAR      | 0.06  | 5.37  | 0.66  | 0.51120 |
| MTX1       | -0.08 | 8.64  | -0.66 | 0.51130 |
| HBEGF      | -0.08 | 5.51  | -0.66 | 0.51143 |
| ZNF813     | -0.06 | 6.39  | -0.66 | 0.51148 |
| BX890604.2 | 0.08  | 6.65  | 0.66  | 0.51150 |
| LILRA2     | -0.09 | 12.09 | -0.66 | 0.51155 |
| ADIPOR1P2  | -0.13 | 6.11  | -0.66 | 0.51166 |
| AC007485.2 | -0.08 | 5.61  | -0.66 | 0.51190 |
| AGGF1      | -0.05 | 7.23  | -0.66 | 0.51204 |
| CCDC65     | -0.08 | 6.90  | -0.66 | 0.51206 |
| ALAS1      | -0.04 | 9.28  | -0.66 | 0.51257 |
| FLOT1      | 0.09  | 11.83 | 0.66  | 0.51271 |
| TRMT61B    | 0.06  | 6.40  | 0.66  | 0.51326 |
| PARP16     | 0.05  | 8.27  | 0.66  | 0.51341 |
| RUSC1-AS1  | 0.07  | 5.16  | 0.66  | 0.51361 |
| AC012569.1 | 0.08  | 4.99  | 0.66  | 0.51362 |
| PACSIN2    | -0.08 | 11.23 | -0.66 | 0.51374 |
| RPL7AP64   | 0.11  | 7.30  | 0.66  | 0.51381 |
| SLAMF6     | 0.06  | 9.86  | 0.66  | 0.51383 |
| COX5A      | 0.07  | 9.06  | 0.66  | 0.51400 |
| PTP4A2     | -0.04 | 11.48 | -0.66 | 0.51427 |
| ZNF169     | -0.07 | 6.25  | -0.66 | 0.51445 |
| MC1R       | -0.09 | 6.01  | -0.66 | 0.51467 |
| PTRH2      | 0.05  | 7.71  | 0.66  | 0.51471 |
| ITM2A      | -0.09 | 8.80  | -0.66 | 0.51483 |
| PSMG3      | 0.08  | 7.99  | 0.66  | 0.51529 |
| APOL6      | -0.09 | 10.41 | -0.65 | 0.51540 |
| TPTEP2     | -0.08 | 6.01  | -0.65 | 0.51545 |
| HDGFL3     | -0.09 | 5.76  | -0.65 | 0.51550 |
| TBCEL      | -0.10 | 6.56  | -0.65 | 0.51554 |
| NMUR1      | -0.10 | 7.87  | -0.65 | 0.51564 |
| RAD51      | 0.07  | 5.27  | 0.65  | 0.51577 |
| ZMYND15    | -0.09 | 6.70  | -0.65 | 0.51583 |
| PTGES3     | -0.04 | 10.40 | -0.65 | 0.51587 |
| ACTG1P11   | 0.08  | 5.60  | 0.65  | 0.51594 |
| PRPSAP1    | 0.04  | 8.12  | 0.65  | 0.51595 |
| ZNF443     | -0.06 | 5.36  | -0.65 | 0.51607 |
| SLC25A14   | -0.05 | 6.36  | -0.65 | 0.51614 |
| TTI2       | 0.04  | 7.92  | 0.65  | 0.51621 |
| ATP5MC3    | 0.06  | 9.50  | 0.65  | 0.51627 |
| UBLCP1     | -0.06 | 8.14  | -0.65 | 0.51640 |
| SIRT4      | -0.07 | 5.32  | -0.65 | 0.51640 |
| TTI1       | -0.04 | 8.25  | -0.65 | 0.51650 |
| MIR1244-2  | 0.08  | 6.94  | 0.65  | 0.51671 |
| PICK1      | 0.05  | 8.29  | 0.65  | 0.51685 |

|            |       |       |       |         |
|------------|-------|-------|-------|---------|
| HAPLN3     | 0.09  | 8.53  | 0.65  | 0.51687 |
| RPS6KA1    | 0.06  | 12.78 | 0.65  | 0.51703 |
| RPL26L1    | 0.06  | 7.45  | 0.65  | 0.51718 |
| RNF34      | -0.03 | 9.52  | -0.65 | 0.51719 |
| C1orf74    | -0.06 | 5.50  | -0.65 | 0.51719 |
| SEC61G     | 0.08  | 7.54  | 0.65  | 0.51719 |
| FTL        | 0.09  | 16.24 | 0.65  | 0.51722 |
| MSI2       | 0.05  | 8.39  | 0.65  | 0.51752 |
| RSBN1      | 0.06  | 8.05  | 0.65  | 0.51762 |
| MEGF6      | -0.09 | 9.05  | -0.65 | 0.51768 |
| ARHGAP15   | 0.05  | 10.48 | 0.65  | 0.51777 |
| CAMK2N1    | 0.08  | 6.13  | 0.65  | 0.51778 |
| ERGIC2     | 0.07  | 7.96  | 0.65  | 0.51808 |
| NT5DC1     | -0.04 | 7.56  | -0.65 | 0.51814 |
| ZNF891     | -0.07 | 5.48  | -0.65 | 0.51825 |
| MDM2       | -0.07 | 8.48  | -0.65 | 0.51847 |
| INHBB      | -0.14 | 5.18  | -0.65 | 0.51853 |
| RBMS1      | -0.07 | 9.68  | -0.65 | 0.51858 |
| PELO       | -0.06 | 8.38  | -0.65 | 0.51861 |
| GBP4       | -0.12 | 9.44  | -0.65 | 0.51862 |
| H3-5       | -0.10 | 7.81  | -0.65 | 0.51884 |
| NIFK       | 0.05  | 8.04  | 0.65  | 0.51908 |
| ARID1B     | -0.06 | 9.74  | -0.65 | 0.51911 |
| PDE4A      | -0.07 | 8.15  | -0.65 | 0.51914 |
| RPL12P17   | 0.06  | 5.37  | 0.65  | 0.51919 |
| FP236383.3 | -0.07 | 5.00  | -0.65 | 0.51929 |
| NEFH       | 0.06  | 5.72  | 0.65  | 0.51930 |
| TRIM27     | -0.05 | 10.58 | -0.65 | 0.51934 |
| CTSE       | 0.12  | 5.04  | 0.65  | 0.51939 |
| CHTOP      | -0.03 | 10.25 | -0.65 | 0.51947 |
| IRF4       | 0.08  | 8.66  | 0.65  | 0.51950 |
| LINC02207  | -0.14 | 6.22  | -0.65 | 0.51955 |
| DDX11L2    | 0.14  | 6.06  | 0.65  | 0.51957 |
| ASAP3      | -0.06 | 5.11  | -0.65 | 0.51958 |
| ZFP37      | -0.06 | 4.99  | -0.65 | 0.51960 |
| TUBG1      | 0.05  | 7.20  | 0.65  | 0.51978 |
| CEP78      | 0.08  | 8.26  | 0.65  | 0.51994 |
| AC016394.2 | 0.06  | 5.13  | 0.65  | 0.52009 |
| HECTD3     | 0.04  | 9.72  | 0.65  | 0.52013 |
| KYAT3      | -0.04 | 7.47  | -0.65 | 0.52014 |
| AC016876.2 | 0.07  | 6.06  | 0.65  | 0.52022 |
| STRN4      | -0.05 | 10.77 | -0.65 | 0.52025 |
| EFNB1      | 0.07  | 7.37  | 0.65  | 0.52065 |
| ACTG1P19   | -0.05 | 5.27  | -0.65 | 0.52072 |
| RAB44      | 0.06  | 7.83  | 0.65  | 0.52080 |
| ATP5F1EP2  | 0.09  | 7.22  | 0.65  | 0.52090 |
| MISP3      | 0.08  | 6.66  | 0.65  | 0.52096 |
| HACD3      | -0.05 | 7.58  | -0.65 | 0.52111 |
| HYOU1      | 0.04  | 10.53 | 0.65  | 0.52112 |
| PDE5A      | -0.08 | 6.04  | -0.65 | 0.52123 |

|            |       |       |       |         |
|------------|-------|-------|-------|---------|
| TTBK2      | 0.06  | 7.77  | 0.65  | 0.52136 |
| COA6       | -0.07 | 6.41  | -0.65 | 0.52142 |
| AL031846.1 | -0.07 | 6.02  | -0.65 | 0.52145 |
| SEMA6A-AS1 | -0.09 | 5.00  | -0.65 | 0.52149 |
| NFE4       | -0.12 | 7.38  | -0.65 | 0.52153 |
| PHC2       | -0.11 | 12.33 | -0.65 | 0.52159 |
| HERC4      | -0.07 | 8.58  | -0.65 | 0.52163 |
| C1orf162   | 0.06  | 11.14 | 0.65  | 0.52171 |
| IGHV3-64D  | 0.17  | 5.76  | 0.64  | 0.52184 |
| IGHV3-13   | 0.13  | 5.52  | 0.64  | 0.52190 |
| IGHV4-55   | 0.11  | 5.44  | 0.64  | 0.52193 |
| AC011477.1 | -0.06 | 5.75  | -0.64 | 0.52212 |
| SYNCRIP    | -0.05 | 9.10  | -0.64 | 0.52214 |
| ZNF131     | -0.05 | 7.92  | -0.64 | 0.52225 |
| AC110079.1 | -0.10 | 7.51  | -0.64 | 0.52268 |
| VOPP1      | 0.05  | 9.69  | 0.64  | 0.52270 |
| CDK16      | 0.04  | 9.44  | 0.64  | 0.52285 |
| ZYX        | 0.08  | 14.14 | 0.64  | 0.52287 |
| C5AR2      | -0.09 | 10.21 | -0.64 | 0.52313 |
| RBM17P4    | 0.07  | 5.31  | 0.64  | 0.52329 |
| PGGT1B     | -0.05 | 7.69  | -0.64 | 0.52335 |
| KANTR      | 0.07  | 6.34  | 0.64  | 0.52364 |
| CHCHD3     | -0.05 | 7.99  | -0.64 | 0.52367 |
| VGLL4      | 0.04  | 8.73  | 0.64  | 0.52378 |
| CDAN1      | 0.04  | 8.19  | 0.64  | 0.52379 |
| CHN1       | 0.08  | 5.40  | 0.64  | 0.52391 |
| BTF3L4     | -0.05 | 7.69  | -0.64 | 0.52395 |
| TSNARE1    | 0.06  | 7.69  | 0.64  | 0.52405 |
| RPS26P31   | 0.13  | 5.76  | 0.64  | 0.52409 |
| SEMA7A     | 0.08  | 7.92  | 0.64  | 0.52416 |
| TRBV5-4    | 0.09  | 6.76  | 0.64  | 0.52430 |
| CACNA2D3   | -0.07 | 6.97  | -0.64 | 0.52431 |
| AP002807.1 | -0.09 | 8.27  | -0.64 | 0.52443 |
| TMEM14DP   | 0.07  | 5.12  | 0.64  | 0.52443 |
| NECTIN1    | -0.09 | 8.46  | -0.64 | 0.52446 |
| EIF3LP2    | 0.07  | 6.34  | 0.64  | 0.52469 |
| ENGASE     | -0.09 | 9.44  | -0.64 | 0.52472 |
| MKRN9P     | -0.10 | 5.76  | -0.64 | 0.52473 |
| HGD        | 0.09  | 6.32  | 0.64  | 0.52475 |
| RARS1      | 0.05  | 8.17  | 0.64  | 0.52483 |
| AFAP1      | -0.08 | 7.46  | -0.64 | 0.52492 |
| AL391244.2 | 0.06  | 5.50  | 0.64  | 0.52500 |
| LSM6       | 0.05  | 7.85  | 0.64  | 0.52521 |
| RPUSD4     | 0.04  | 8.17  | 0.64  | 0.52532 |
| AC024619.4 | 0.08  | 5.72  | 0.64  | 0.52534 |
| TRAV27     | -0.07 | 5.68  | -0.64 | 0.52538 |
| MTCO1P12   | -0.08 | 10.76 | -0.64 | 0.52549 |
| MT-ATP6    | 0.05  | 13.85 | 0.64  | 0.52549 |
| ZDHHC1     | 0.08  | 5.94  | 0.64  | 0.52575 |
| ZNF557     | 0.05  | 7.06  | 0.64  | 0.52580 |

|            |       |       |       |         |
|------------|-------|-------|-------|---------|
| SLC7A7     | -0.06 | 11.33 | -0.64 | 0.52592 |
| TNFSF13B   | -0.11 | 9.76  | -0.64 | 0.52605 |
| AC010642.2 | 0.08  | 6.77  | 0.64  | 0.52621 |
| WLS        | 0.10  | 9.06  | 0.64  | 0.52621 |
| AC020651.2 | -0.08 | 4.93  | -0.64 | 0.52654 |
| CSTF2      | 0.05  | 7.48  | 0.64  | 0.52657 |
| COMMD3     | 0.06  | 6.75  | 0.64  | 0.52667 |
| CKLF       | -0.08 | 7.83  | -0.64 | 0.52670 |
| DBT        | 0.05  | 7.34  | 0.64  | 0.52689 |
| ZNF280C    | -0.07 | 5.02  | -0.64 | 0.52693 |
| AC060766.1 | -0.07 | 5.04  | -0.64 | 0.52714 |
| PTP4A2P2   | -0.08 | 5.69  | -0.64 | 0.52718 |
| ZNF613     | 0.05  | 6.47  | 0.64  | 0.52723 |
| ZNF646     | 0.05  | 9.62  | 0.64  | 0.52746 |
| PML        | -0.08 | 10.46 | -0.64 | 0.52747 |
| ARHGAP22   | 0.08  | 5.82  | 0.64  | 0.52748 |
| AK6        | 0.06  | 5.87  | 0.64  | 0.52752 |
| LINC02210  | -0.06 | 7.10  | -0.64 | 0.52758 |
| BSPRY      | 0.07  | 5.26  | 0.64  | 0.52769 |
| TENM1      | -0.12 | 5.49  | -0.64 | 0.52774 |
| AL590550.1 | -0.10 | 4.96  | -0.64 | 0.52790 |
| SLC15A2    | -0.09 | 6.12  | -0.64 | 0.52801 |
| FCN2       | 0.06  | 5.31  | 0.64  | 0.52803 |
| AC004918.1 | -0.07 | 5.89  | -0.64 | 0.52804 |
| RMRP       | -0.09 | 5.11  | -0.64 | 0.52804 |
| DUSP28     | 0.05  | 6.47  | 0.64  | 0.52809 |
| COA7       | -0.06 | 6.49  | -0.63 | 0.52827 |
| VPS11      | 0.03  | 10.25 | 0.63  | 0.52829 |
| HSD17B7    | -0.05 | 7.20  | -0.63 | 0.52838 |
| ANXA2P2    | -0.10 | 8.19  | -0.63 | 0.52846 |
| UBA7       | -0.06 | 11.38 | -0.63 | 0.52846 |
| AMIGO1     | 0.09  | 7.97  | 0.63  | 0.52846 |
| ENPP2      | 0.07  | 5.32  | 0.63  | 0.52855 |
| PCSK4      | 0.09  | 5.04  | 0.63  | 0.52890 |
| PRKY       | -0.27 | 7.46  | -0.63 | 0.52893 |
| RAB27B     | -0.08 | 6.48  | -0.63 | 0.52900 |
| WAS        | 0.07  | 13.25 | 0.63  | 0.52913 |
| MYEF2      | -0.10 | 5.56  | -0.63 | 0.52941 |
| ALOX12-AS1 | 0.08  | 6.77  | 0.63  | 0.52941 |
| NPDC1      | 0.11  | 7.10  | 0.63  | 0.52942 |
| ANXA2P1    | -0.06 | 5.10  | -0.63 | 0.52942 |
| AC009093.2 | -0.07 | 5.12  | -0.63 | 0.52948 |
| IQCB1      | 0.05  | 7.77  | 0.63  | 0.52965 |
| PLAC8      | 0.07  | 10.37 | 0.63  | 0.52966 |
| NLRX1      | 0.06  | 9.35  | 0.63  | 0.52971 |
| SON        | -0.06 | 11.23 | -0.63 | 0.52977 |
| MIEF1      | -0.04 | 9.04  | -0.63 | 0.52983 |
| UBA1       | 0.04  | 12.86 | 0.63  | 0.52992 |
| ASB16-AS1  | 0.05  | 7.76  | 0.63  | 0.52992 |
| DNMBP      | -0.07 | 7.40  | -0.63 | 0.52999 |

|            |       |       |       |         |
|------------|-------|-------|-------|---------|
| ANKLE2     | -0.03 | 9.72  | -0.63 | 0.53000 |
| B3GAT3P1   | 0.07  | 5.05  | 0.63  | 0.53015 |
| AL161785.1 | 0.07  | 7.06  | 0.63  | 0.53018 |
| SLC9A9     | -0.04 | 7.86  | -0.63 | 0.53019 |
| RBAK       | -0.06 | 6.82  | -0.63 | 0.53029 |
| RPL32P3    | 0.08  | 7.52  | 0.63  | 0.53042 |
| AGAP14P    | 0.09  | 5.05  | 0.63  | 0.53055 |
| AC133555.4 | 0.08  | 7.28  | 0.63  | 0.53057 |
| TRMT6      | -0.04 | 7.35  | -0.63 | 0.53058 |
| AMZ2       | -0.04 | 9.29  | -0.63 | 0.53062 |
| AC055839.2 | -0.08 | 7.59  | -0.63 | 0.53090 |
| CALM2P4    | -0.09 | 5.91  | -0.63 | 0.53118 |
| APCDD1     | -0.09 | 5.27  | -0.63 | 0.53135 |
| ACKR3      | -0.07 | 6.39  | -0.63 | 0.53141 |
| PPP1R11    | 0.04  | 10.31 | 0.63  | 0.53176 |
| SLC38A6    | -0.06 | 5.83  | -0.63 | 0.53183 |
| SYF2       | 0.05  | 9.79  | 0.63  | 0.53192 |
| PIM3       | 0.07  | 9.78  | 0.63  | 0.53192 |
| PLK1       | -0.07 | 6.21  | -0.63 | 0.53202 |
| IGHJ5      | 0.13  | 7.16  | 0.63  | 0.53217 |
| GREM2      | -0.09 | 4.90  | -0.63 | 0.53223 |
| NKAPL      | 0.08  | 5.21  | 0.63  | 0.53225 |
| AC018607.1 | 0.11  | 5.11  | 0.63  | 0.53229 |
| MAP1A      | 0.08  | 7.38  | 0.63  | 0.53240 |
| FCGR2B     | -0.10 | 8.67  | -0.63 | 0.53245 |
| LMO7       | -0.09 | 6.43  | -0.63 | 0.53247 |
| DUSP10     | -0.05 | 6.78  | -0.63 | 0.53269 |
| ZFAND3     | -0.06 | 10.69 | -0.63 | 0.53275 |
| H3C10      | -0.10 | 7.76  | -0.63 | 0.53292 |
| PXYLP1     | -0.08 | 7.05  | -0.63 | 0.53294 |
| PPP2R2B    | -0.08 | 7.01  | -0.63 | 0.53306 |
| MCM3       | 0.04  | 9.99  | 0.63  | 0.53315 |
| MAST3      | -0.06 | 11.72 | -0.63 | 0.53339 |
| AP001000.1 | -0.09 | 5.89  | -0.63 | 0.53362 |
| KDM4A      | 0.04  | 8.57  | 0.63  | 0.53381 |
| UTP20      | -0.06 | 6.93  | -0.63 | 0.53381 |
| ALAD       | -0.04 | 8.85  | -0.63 | 0.53381 |
| GLO1       | 0.07  | 7.92  | 0.63  | 0.53401 |
| TYW5       | 0.06  | 6.61  | 0.63  | 0.53403 |
| OLA1       | 0.05  | 8.09  | 0.63  | 0.53405 |
| AC099343.3 | -0.09 | 5.69  | -0.63 | 0.53410 |
| MTERF1     | -0.05 | 6.53  | -0.63 | 0.53410 |
| AC037459.2 | 0.14  | 6.95  | 0.63  | 0.53429 |
| CEP250-AS1 | -0.06 | 6.49  | -0.63 | 0.53452 |
| IFIT1B     | 0.14  | 6.73  | 0.63  | 0.53466 |
| LINC01094  | -0.08 | 5.87  | -0.62 | 0.53486 |
| TTLL3      | -0.09 | 8.82  | -0.62 | 0.53497 |
| LIN37      | -0.08 | 6.08  | -0.62 | 0.53529 |
| CXCL8      | -0.09 | 5.78  | -0.62 | 0.53542 |
| TRBJ1-1    | 0.09  | 5.66  | 0.62  | 0.53574 |

|            |       |       |       |         |
|------------|-------|-------|-------|---------|
| ZNF836     | 0.05  | 6.64  | 0.62  | 0.53594 |
| RSU1       | 0.05  | 9.84  | 0.62  | 0.53599 |
| EFNA1      | 0.09  | 5.29  | 0.62  | 0.53602 |
| SYT11      | -0.06 | 8.63  | -0.62 | 0.53608 |
| MBD6       | -0.09 | 11.34 | -0.62 | 0.53612 |
| TMEM121    | 0.08  | 5.17  | 0.62  | 0.53639 |
| TMEM163    | 0.08  | 4.92  | 0.62  | 0.53655 |
| SUPT7L     | -0.04 | 9.00  | -0.62 | 0.53661 |
| NRBP2      | -0.09 | 6.98  | -0.62 | 0.53668 |
| NPTXR      | 0.08  | 7.62  | 0.62  | 0.53683 |
| DUSP3      | -0.05 | 8.87  | -0.62 | 0.53689 |
| ZCCHC7     | 0.05  | 7.92  | 0.62  | 0.53708 |
| TRIM7      | 0.07  | 6.36  | 0.62  | 0.53712 |
| MIR103A2   | 0.06  | 4.98  | 0.62  | 0.53714 |
| NECTIN2    | -0.22 | 7.59  | -0.62 | 0.53721 |
| AC084824.2 | 0.07  | 7.43  | 0.62  | 0.53724 |
| IGKV2D-30  | 0.13  | 5.48  | 0.62  | 0.53730 |
| FXVD6      | -0.09 | 7.57  | -0.62 | 0.53746 |
| IFT20      | -0.05 | 7.95  | -0.62 | 0.53750 |
| AC017104.6 | -0.07 | 5.13  | -0.62 | 0.53754 |
| AC104996.2 | -0.06 | 5.05  | -0.62 | 0.53776 |
| ZNF706     | -0.04 | 8.99  | -0.62 | 0.53796 |
| AC116366.2 | -0.09 | 5.72  | -0.62 | 0.53798 |
| FBLN2      | 0.10  | 6.27  | 0.62  | 0.53800 |
| IFFO2      | 0.05  | 9.51  | 0.62  | 0.53817 |
| ATXN2      | 0.06  | 9.05  | 0.62  | 0.53829 |
| PIPSL      | 0.07  | 6.92  | 0.62  | 0.53839 |
| TRAV8-2    | -0.09 | 5.98  | -0.62 | 0.53840 |
| TMEM131L   | -0.03 | 10.29 | -0.62 | 0.53850 |
| MS4A7      | -0.09 | 8.88  | -0.62 | 0.53852 |
| SEC63P1    | -0.06 | 5.02  | -0.62 | 0.53870 |
| AC004951.1 | 0.07  | 5.18  | 0.62  | 0.53874 |
| PARP6      | -0.04 | 9.27  | -0.62 | 0.53878 |
| AC100803.3 | 0.11  | 5.63  | 0.62  | 0.53883 |
| AP000529.1 | 0.08  | 5.85  | 0.62  | 0.53888 |
| TRMT2B     | 0.05  | 8.06  | 0.62  | 0.53922 |
| AL122035.2 | -0.08 | 5.02  | -0.62 | 0.53929 |
| AC027020.2 | -0.10 | 6.58  | -0.62 | 0.53953 |
| SLC39A8    | -0.07 | 6.83  | -0.62 | 0.53959 |
| GTPBP8     | 0.05  | 6.44  | 0.62  | 0.53960 |
| YTHDF2P1   | -0.06 | 5.01  | -0.62 | 0.53961 |
| AC107959.3 | -0.09 | 7.08  | -0.62 | 0.53966 |
| MAD1L1     | 0.08  | 7.31  | 0.62  | 0.53977 |
| LINC02033  | 0.07  | 5.06  | 0.62  | 0.53986 |
| SPTBN1     | -0.08 | 10.15 | -0.62 | 0.53987 |
| WDR12      | -0.05 | 6.89  | -0.62 | 0.53988 |
| ZFP69      | -0.05 | 6.10  | -0.62 | 0.54021 |
| AC010186.2 | -0.06 | 6.17  | -0.62 | 0.54026 |
| NAIPP3     | -0.07 | 5.21  | -0.62 | 0.54035 |
| KMT5C      | 0.07  | 7.32  | 0.62  | 0.54061 |

|            |       |       |       |         |
|------------|-------|-------|-------|---------|
| ZNF619     | -0.05 | 6.38  | -0.62 | 0.54062 |
| IL18       | 0.06  | 6.92  | 0.62  | 0.54066 |
| FAM200B    | -0.05 | 7.91  | -0.62 | 0.54107 |
| TRIM52     | -0.06 | 7.83  | -0.62 | 0.54114 |
| ZNF441     | -0.07 | 6.07  | -0.62 | 0.54115 |
| AL035587.2 | 0.07  | 5.87  | 0.62  | 0.54115 |
| PSMB9      | -0.07 | 11.82 | -0.62 | 0.54116 |
| GFOD1      | 0.07  | 8.07  | 0.62  | 0.54121 |
| CSTA       | -0.08 | 10.01 | -0.62 | 0.54124 |
| GPR19      | -0.08 | 5.16  | -0.61 | 0.54137 |
| CACYBPP2   | -0.07 | 5.60  | -0.61 | 0.54156 |
| GPR89B     | 0.05  | 5.93  | 0.61  | 0.54172 |
| CLTCL1     | -0.09 | 7.27  | -0.61 | 0.54196 |
| GLRXP3     | 0.07  | 5.08  | 0.61  | 0.54200 |
| AL445524.1 | -0.08 | 5.92  | -0.61 | 0.54205 |
| HMGB1P5    | -0.06 | 7.55  | -0.61 | 0.54209 |
| MORC4      | -0.05 | 6.32  | -0.61 | 0.54209 |
| EIF1P7     | -0.06 | 5.56  | -0.61 | 0.54211 |
| AC084036.1 | 0.07  | 4.89  | 0.61  | 0.54213 |
| TEFM       | -0.05 | 6.27  | -0.61 | 0.54222 |
| ELOA       | -0.04 | 9.00  | -0.61 | 0.54243 |
| TCP1       | -0.04 | 9.84  | -0.61 | 0.54256 |
| DPEP2      | 0.07  | 12.08 | 0.61  | 0.54259 |
| ZNF529-AS1 | -0.06 | 5.80  | -0.61 | 0.54265 |
| CST7       | 0.12  | 11.88 | 0.61  | 0.54272 |
| RABL3      | 0.05  | 7.25  | 0.61  | 0.54272 |
| GLTP       | 0.04  | 9.64  | 0.61  | 0.54273 |
| SLPI       | -0.13 | 7.80  | -0.61 | 0.54277 |
| RPL30P2    | 0.05  | 5.17  | 0.61  | 0.54322 |
| SNRPD3     | 0.05  | 8.36  | 0.61  | 0.54330 |
| NAA16      | -0.06 | 7.26  | -0.61 | 0.54336 |
| NIPSNAP3B  | -0.08 | 5.27  | -0.61 | 0.54346 |
| ATP6V0D1   | 0.06  | 12.35 | 0.61  | 0.54352 |
| FAM177A1   | -0.05 | 7.51  | -0.61 | 0.54369 |
| LIN7B      | 0.06  | 6.20  | 0.61  | 0.54383 |
| LINC02284  | -0.07 | 5.12  | -0.61 | 0.54398 |
| ZDHHC19    | -0.11 | 5.62  | -0.61 | 0.54439 |
| TBC1D3L    | -0.11 | 7.18  | -0.61 | 0.54460 |
| DOK4       | 0.09  | 6.67  | 0.61  | 0.54480 |
| CD59       | -0.08 | 8.82  | -0.61 | 0.54490 |
| STAB1      | -0.09 | 10.96 | -0.61 | 0.54508 |
| TMUB2      | 0.06  | 10.39 | 0.61  | 0.54519 |
| RRBP1      | 0.05  | 10.71 | 0.61  | 0.54522 |
| AC135068.2 | 0.10  | 5.48  | 0.61  | 0.54533 |
| ZNF569     | -0.05 | 5.74  | -0.61 | 0.54536 |
| NXT2       | -0.06 | 6.27  | -0.61 | 0.54558 |
| YAE1       | -0.06 | 5.67  | -0.61 | 0.54563 |
| CACNG8     | 0.09  | 5.51  | 0.61  | 0.54565 |
| RANP1      | 0.08  | 6.32  | 0.61  | 0.54570 |
| LINC00884  | 0.07  | 5.25  | 0.61  | 0.54578 |



|            |       |       |       |         |
|------------|-------|-------|-------|---------|
| SH3BP2     | -0.05 | 11.62 | -0.61 | 0.54585 |
| SERPINB1   | -0.07 | 11.91 | -0.61 | 0.54587 |
| ZSWIM7     | -0.04 | 7.78  | -0.61 | 0.54588 |
| GPN3       | -0.05 | 6.63  | -0.61 | 0.54591 |
| FCRL5      | -0.15 | 7.49  | -0.61 | 0.54627 |
| ST8SIA1    | 0.10  | 6.12  | 0.61  | 0.54649 |
| ADAP2      | 0.07  | 8.45  | 0.61  | 0.54655 |
| SH3BP5L    | 0.05  | 10.60 | 0.61  | 0.54657 |
| CD24       | -0.08 | 7.58  | -0.61 | 0.54666 |
| MT-TF      | 0.12  | 7.60  | 0.61  | 0.54667 |
| ZNF79      | -0.04 | 7.11  | -0.61 | 0.54673 |
| ALG1L13P   | -0.10 | 6.98  | -0.61 | 0.54716 |
| KBTBD11    | -0.05 | 8.28  | -0.61 | 0.54730 |
| OGFR       | 0.05  | 10.99 | 0.61  | 0.54744 |
| AC092115.2 | -0.09 | 6.69  | -0.60 | 0.54783 |
| PET100     | 0.06  | 8.13  | 0.60  | 0.54784 |
| SLC9A3-AS1 | -0.11 | 6.51  | -0.60 | 0.54789 |
| LGALS9B    | -0.09 | 6.13  | -0.60 | 0.54789 |
| MRVI1-AS1  | 0.08  | 5.41  | 0.60  | 0.54805 |
| SLC15A3    | 0.07  | 11.05 | 0.60  | 0.54811 |
| ABCC1      | -0.04 | 9.87  | -0.60 | 0.54815 |
| SNHG17     | 0.08  | 8.04  | 0.60  | 0.54818 |
| MMP15      | -0.08 | 5.15  | -0.60 | 0.54820 |
| DCTN1      | 0.04  | 10.96 | 0.60  | 0.54839 |
| ITGAE      | -0.06 | 7.80  | -0.60 | 0.54863 |
| ATP6V1G2   | -0.07 | 5.04  | -0.60 | 0.54872 |
| MYL6P5     | 0.08  | 6.29  | 0.60  | 0.54898 |
| FBP1       | 0.07  | 9.25  | 0.60  | 0.54923 |
| SPATA2     | 0.04  | 8.31  | 0.60  | 0.54924 |
| WAKMAR2    | 0.07  | 5.89  | 0.60  | 0.54930 |
| ZNF540     | 0.08  | 5.85  | 0.60  | 0.54937 |
| PYROXD1    | -0.05 | 6.73  | -0.60 | 0.54939 |
| STAG3      | -0.09 | 5.88  | -0.60 | 0.54948 |
| IGHV3-73   | 0.12  | 5.85  | 0.60  | 0.54958 |
| EPHB4      | -0.11 | 8.56  | -0.60 | 0.54970 |
| AL512306.2 | -0.09 | 6.63  | -0.60 | 0.54995 |
| AL353763.2 | -0.08 | 6.20  | -0.60 | 0.54996 |
| AL592295.1 | 0.05  | 5.30  | 0.60  | 0.55010 |
| WDR43      | -0.05 | 7.63  | -0.60 | 0.55011 |
| CTC1       | -0.06 | 10.29 | -0.60 | 0.55026 |
| PPIL1      | 0.05  | 7.05  | 0.60  | 0.55026 |
| LLGL1      | 0.04  | 8.72  | 0.60  | 0.55028 |
| USP42      | 0.06  | 7.96  | 0.60  | 0.55037 |
| NME1       | 0.07  | 7.10  | 0.60  | 0.55038 |
| CAP1       | -0.05 | 13.34 | -0.60 | 0.55052 |
| FRAT1      | -0.08 | 10.59 | -0.60 | 0.55065 |
| CNST       | -0.05 | 8.26  | -0.60 | 0.55079 |
| GAA        | 0.06  | 11.35 | 0.60  | 0.55080 |
| TRBV6-6    | 0.09  | 6.65  | 0.60  | 0.55082 |
| RGS19      | 0.06  | 11.41 | 0.60  | 0.55113 |

|             |       |       |       |         |
|-------------|-------|-------|-------|---------|
| PIP4P1      | -0.03 | 9.35  | -0.60 | 0.55128 |
| FAM161B     | 0.06  | 5.93  | 0.60  | 0.55130 |
| SLC25A39P1  | 0.14  | 6.10  | 0.60  | 0.55166 |
| TTLL1       | 0.05  | 7.11  | 0.60  | 0.55174 |
| EIF3KP1     | 0.08  | 5.84  | 0.60  | 0.55182 |
| CD244       | -0.05 | 9.48  | -0.60 | 0.55191 |
| AL731571.1  | 0.07  | 4.95  | 0.60  | 0.55199 |
| CCSER2      | -0.05 | 8.18  | -0.60 | 0.55219 |
| LINC02325   | 0.07  | 5.68  | 0.60  | 0.55229 |
| TNK2        | 0.06  | 11.02 | 0.60  | 0.55240 |
| NUTM2D      | 0.08  | 5.42  | 0.60  | 0.55267 |
| AC083873.1  | 0.07  | 5.76  | 0.60  | 0.55268 |
| TBC1D3D     | -0.07 | 6.40  | -0.60 | 0.55268 |
| HNRNPA3P6   | -0.09 | 6.42  | -0.60 | 0.55270 |
| NHLH1       | -0.07 | 5.03  | -0.60 | 0.55287 |
| DICER1-AS1  | -0.08 | 6.01  | -0.60 | 0.55293 |
| TRPC2       | 0.08  | 5.11  | 0.60  | 0.55294 |
| TTC3        | 0.04  | 10.09 | 0.60  | 0.55300 |
| AL596087.1  | -0.08 | 6.81  | -0.60 | 0.55331 |
| AL138995.1  | -0.06 | 5.30  | -0.60 | 0.55369 |
| TPRKB       | 0.05  | 7.01  | 0.60  | 0.55379 |
| CYTH3       | -0.06 | 7.61  | -0.60 | 0.55381 |
| PCBP3       | -0.07 | 5.70  | -0.60 | 0.55404 |
| WBP1L       | 0.04  | 10.62 | 0.60  | 0.55415 |
| LILRP1      | -0.10 | 6.65  | -0.60 | 0.55416 |
| AC111152.3  | 0.08  | 5.84  | 0.60  | 0.55421 |
| FAAH2       | -0.08 | 5.66  | -0.59 | 0.55448 |
| CALM1P2     | 0.07  | 5.35  | 0.59  | 0.55451 |
| TNIK        | -0.06 | 8.05  | -0.59 | 0.55456 |
| GSKIP       | -0.07 | 7.25  | -0.59 | 0.55479 |
| LYRM1       | -0.06 | 7.67  | -0.59 | 0.55503 |
| WASH6P      | 0.07  | 7.87  | 0.59  | 0.55506 |
| FBXW8       | -0.06 | 6.72  | -0.59 | 0.55509 |
| FNBP1       | -0.03 | 11.63 | -0.59 | 0.55510 |
| Z97180.1    | -0.07 | 5.15  | -0.59 | 0.55511 |
| TIMM10B     | -0.04 | 7.95  | -0.59 | 0.55533 |
| LTF         | 0.25  | 9.95  | 0.59  | 0.55542 |
| LAMTOR5-AS1 | -0.07 | 5.04  | -0.59 | 0.55555 |
| ABCD1       | 0.05  | 8.92  | 0.59  | 0.55557 |
| ZFP1        | -0.06 | 5.88  | -0.59 | 0.55569 |
| RGPD1       | 0.07  | 5.03  | 0.59  | 0.55572 |
| AC007384.1  | 0.05  | 6.13  | 0.59  | 0.55573 |
| TTYH2       | -0.05 | 9.16  | -0.59 | 0.55575 |
| SMAGP       | 0.07  | 6.41  | 0.59  | 0.55580 |
| NARF        | 0.08  | 11.06 | 0.59  | 0.55585 |
| TUBGCP6     | 0.06  | 10.38 | 0.59  | 0.55590 |
| DRC7        | -0.08 | 5.27  | -0.59 | 0.55604 |
| AC036176.1  | 0.06  | 4.98  | 0.59  | 0.55604 |
| ASXL1       | -0.04 | 9.91  | -0.59 | 0.55610 |
| AC241952.2  | -0.08 | 5.97  | -0.59 | 0.55636 |

|            |       |       |       |         |
|------------|-------|-------|-------|---------|
| SNX21      | 0.07  | 6.60  | 0.59  | 0.55643 |
| HCFC1      | 0.04  | 10.31 | 0.59  | 0.55647 |
| AL109809.4 | -0.08 | 6.06  | -0.59 | 0.55651 |
| ST7L       | 0.05  | 6.50  | 0.59  | 0.55662 |
| EMC1-AS1   | 0.06  | 5.19  | 0.59  | 0.55664 |
| RAB3A      | 0.05  | 6.04  | 0.59  | 0.55677 |
| AL031283.1 | -0.08 | 5.50  | -0.59 | 0.55684 |
| MTMR2      | -0.05 | 6.64  | -0.59 | 0.55689 |
| PSMD6-AS2  | -0.08 | 5.58  | -0.59 | 0.55707 |
| TAF1C      | 0.07  | 9.49  | 0.59  | 0.55708 |
| TRDMT1     | -0.06 | 6.27  | -0.59 | 0.55714 |
| DDX42      | -0.04 | 10.08 | -0.59 | 0.55724 |
| AC009533.1 | 0.10  | 5.84  | 0.59  | 0.55731 |
| H4C4       | 0.09  | 5.09  | 0.59  | 0.55733 |
| PCNA       | 0.05  | 8.42  | 0.59  | 0.55760 |
| UGGT2      | -0.07 | 5.06  | -0.59 | 0.55771 |
| MRFAP1L1   | 0.03  | 9.67  | 0.59  | 0.55774 |
| CASP4      | -0.07 | 11.69 | -0.59 | 0.55792 |
| KRT73      | -0.13 | 6.11  | -0.59 | 0.55792 |
| ZGPAT      | 0.06  | 7.11  | 0.59  | 0.55799 |
| SLX1B      | 0.05  | 5.30  | 0.59  | 0.55800 |
| SCAMP1-AS1 | 0.05  | 7.13  | 0.59  | 0.55800 |
| TMEM185B   | 0.06  | 8.95  | 0.59  | 0.55808 |
| GAPDHP38   | 0.08  | 6.13  | 0.59  | 0.55811 |
| ATP9B      | 0.04  | 8.35  | 0.59  | 0.55814 |
| JHY        | 0.06  | 5.73  | 0.59  | 0.55836 |
| KMT2E-AS1  | 0.08  | 6.31  | 0.59  | 0.55838 |
| HYAL2      | -0.05 | 6.84  | -0.59 | 0.55838 |
| PIP5K1A    | -0.04 | 8.78  | -0.59 | 0.55848 |
| ATF4P3     | 0.07  | 6.40  | 0.59  | 0.55850 |
| GPHN       | 0.05  | 6.38  | 0.59  | 0.55859 |
| TMEM183B   | 0.06  | 6.03  | 0.59  | 0.55871 |
| HSP90AB3P  | -0.09 | 7.40  | -0.59 | 0.55872 |
| LAP3       | -0.11 | 9.52  | -0.59 | 0.55874 |
| AIMP1      | -0.04 | 8.46  | -0.59 | 0.55878 |
| KLHDC7B    | 0.07  | 7.73  | 0.59  | 0.55879 |
| CAMK2G     | 0.05  | 10.81 | 0.59  | 0.55883 |
| RRN3P1     | -0.08 | 6.45  | -0.59 | 0.55886 |
| CDKAL1     | -0.05 | 7.16  | -0.59 | 0.55902 |
| POTEKP     | 0.08  | 6.95  | 0.59  | 0.55919 |
| CASTOR2    | -0.06 | 7.80  | -0.59 | 0.55924 |
| TIAM2      | -0.07 | 6.71  | -0.59 | 0.55936 |
| AL596244.1 | 0.05  | 5.65  | 0.59  | 0.55963 |
| TTC39C     | 0.06  | 8.49  | 0.59  | 0.55964 |
| PANK2      | -0.04 | 9.55  | -0.59 | 0.55978 |
| SNED1      | -0.07 | 6.71  | -0.59 | 0.55981 |
| ZC3H7B     | -0.04 | 9.58  | -0.59 | 0.55992 |
| TRBV21-1   | 0.10  | 5.49  | 0.59  | 0.56002 |
| CARMIL1    | -0.07 | 5.98  | -0.59 | 0.56015 |
| ACBD6      | -0.04 | 8.24  | -0.59 | 0.56020 |

|            |       |       |       |         |
|------------|-------|-------|-------|---------|
| CAMSAP1    | -0.04 | 8.17  | -0.59 | 0.56021 |
| SELENOI    | -0.07 | 6.62  | -0.59 | 0.56024 |
| EXOSC6     | 0.05  | 7.77  | 0.59  | 0.56024 |
| AL731557.1 | -0.09 | 6.46  | -0.59 | 0.56027 |
| WASH2P     | 0.07  | 7.96  | 0.59  | 0.56028 |
| C12orf42   | 0.08  | 5.52  | 0.59  | 0.56029 |
| CEP72      | 0.06  | 6.00  | 0.59  | 0.56032 |
| AL138721.1 | 0.07  | 5.24  | 0.59  | 0.56050 |
| FAXDC2     | 0.12  | 8.83  | 0.59  | 0.56050 |
| MFAP1      | 0.04  | 8.47  | 0.59  | 0.56064 |
| PHACTR1    | 0.08  | 7.41  | 0.59  | 0.56074 |
| LINC00926  | 0.11  | 9.00  | 0.59  | 0.56093 |
| TUBA1B     | 0.04  | 11.50 | 0.59  | 0.56104 |
| FBXO7      | 0.12  | 13.61 | 0.58  | 0.56125 |
| RPL5P34    | 0.09  | 8.01  | 0.58  | 0.56128 |
| ALMS1      | -0.05 | 7.34  | -0.58 | 0.56129 |
| PRRC2A     | 0.04  | 12.25 | 0.58  | 0.56140 |
| LINC02649  | -0.12 | 6.14  | -0.58 | 0.56142 |
| HES4       | -0.11 | 5.61  | -0.58 | 0.56148 |
| MYO1D      | 0.06  | 6.82  | 0.58  | 0.56175 |
| AC006927.1 | -0.08 | 5.19  | -0.58 | 0.56176 |
| SOX6       | 0.12  | 5.88  | 0.58  | 0.56189 |
| AIFM1      | -0.05 | 8.60  | -0.58 | 0.56189 |
| IGHV3-69-1 | 0.10  | 6.07  | 0.58  | 0.56209 |
| ZNF34      | -0.05 | 6.49  | -0.58 | 0.56214 |
| CIAPIN1P   | 0.07  | 5.09  | 0.58  | 0.56236 |
| DHX57      | 0.04  | 8.17  | 0.58  | 0.56260 |
| PLEKHG2    | 0.05  | 8.32  | 0.58  | 0.56264 |
| AC136475.3 | -0.13 | 8.08  | -0.58 | 0.56264 |
| AC009682.1 | -0.09 | 4.95  | -0.58 | 0.56266 |
| CARNS1     | 0.08  | 7.88  | 0.58  | 0.56270 |
| HCCS       | -0.04 | 7.82  | -0.58 | 0.56275 |
| CDC37L1    | -0.04 | 7.05  | -0.58 | 0.56277 |
| RILPL2     | 0.06  | 10.51 | 0.58  | 0.56285 |
| UCHL3      | 0.05  | 5.77  | 0.58  | 0.56332 |
| GDPD1      | 0.06  | 5.35  | 0.58  | 0.56355 |
| TRAV13-2   | 0.08  | 5.74  | 0.58  | 0.56364 |
| MAP3K3     | -0.05 | 11.81 | -0.58 | 0.56370 |
| CPSF6      | 0.03  | 8.95  | 0.58  | 0.56374 |
| MTHFD1     | -0.05 | 8.34  | -0.58 | 0.56375 |
| PPP2CA     | -0.04 | 9.96  | -0.58 | 0.56386 |
| PCAT1      | -0.07 | 5.34  | -0.58 | 0.56412 |
| DIPK1A     | 0.06  | 6.40  | 0.58  | 0.56430 |
| ZNF189     | 0.05  | 6.98  | 0.58  | 0.56432 |
| ZNF418     | -0.09 | 5.59  | -0.58 | 0.56438 |
| GANC       | -0.06 | 7.38  | -0.58 | 0.56449 |
| FBXO41     | 0.06  | 8.20  | 0.58  | 0.56462 |
| BCKDK      | 0.06  | 10.15 | 0.58  | 0.56469 |
| SRP14-AS1  | -0.05 | 5.77  | -0.58 | 0.56484 |
| AC023794.5 | 0.06  | 5.19  | 0.58  | 0.56496 |

|            |       |       |       |         |
|------------|-------|-------|-------|---------|
| TSPAN4     | 0.08  | 7.92  | 0.58  | 0.56512 |
| ACKR1      | 0.12  | 6.05  | 0.58  | 0.56519 |
| CCNT2-AS1  | 0.07  | 5.37  | 0.58  | 0.56523 |
| ITPKC      | 0.07  | 8.47  | 0.58  | 0.56529 |
| UQCRC2     | -0.03 | 10.32 | -0.58 | 0.56534 |
| WDR83      | 0.04  | 7.36  | 0.58  | 0.56537 |
| RPN1       | 0.05  | 11.69 | 0.58  | 0.56551 |
| VAV2       | 0.06  | 8.70  | 0.58  | 0.56552 |
| ODF3B      | -0.11 | 9.08  | -0.58 | 0.56556 |
| TPST2      | 0.05  | 10.05 | 0.58  | 0.56561 |
| AC004847.1 | -0.05 | 8.11  | -0.58 | 0.56573 |
| STARD7-AS1 | 0.06  | 6.22  | 0.58  | 0.56603 |
| AC009779.4 | -0.07 | 5.26  | -0.58 | 0.56612 |
| TNK2-AS1   | -0.07 | 5.72  | -0.58 | 0.56615 |
| ANKRD17    | -0.05 | 9.06  | -0.58 | 0.56628 |
| HDAC10     | 0.07  | 6.61  | 0.58  | 0.56639 |
| FCRL2      | -0.12 | 7.24  | -0.58 | 0.56649 |
| SLC22A1    | -0.09 | 6.68  | -0.58 | 0.56658 |
| JPT1       | 0.07  | 10.79 | 0.58  | 0.56659 |
| AL359220.1 | 0.08  | 6.67  | 0.58  | 0.56665 |
| SMPDL3B    | -0.07 | 5.76  | -0.58 | 0.56681 |
| SLC25A5    | 0.04  | 10.99 | 0.58  | 0.56689 |
| ZNF337     | -0.05 | 8.11  | -0.58 | 0.56695 |
| MANEA      | -0.07 | 5.98  | -0.58 | 0.56723 |
| IMMP1L     | 0.06  | 5.57  | 0.58  | 0.56745 |
| NUDT17     | 0.06  | 6.26  | 0.58  | 0.56745 |
| CBX8       | 0.05  | 6.83  | 0.58  | 0.56745 |
| ZNF799     | -0.06 | 5.74  | -0.58 | 0.56758 |
| DTWD1      | 0.05  | 6.02  | 0.58  | 0.56763 |
| GALE       | 0.05  | 7.44  | 0.58  | 0.56763 |
| SLC25A3P2  | 0.07  | 5.81  | 0.57  | 0.56783 |
| RFLNB      | 0.06  | 10.91 | 0.57  | 0.56815 |
| CYSTM1     | -0.11 | 9.35  | -0.57 | 0.56815 |
| CDKN2D     | 0.07  | 11.13 | 0.57  | 0.56824 |
| SLC25A19   | 0.06  | 7.70  | 0.57  | 0.56845 |
| REEP5      | -0.04 | 10.15 | -0.57 | 0.56854 |
| GTF2E2     | -0.05 | 7.79  | -0.57 | 0.56871 |
| ATF4P4     | -0.05 | 5.39  | -0.57 | 0.56871 |
| CALM2P3    | -0.07 | 5.90  | -0.57 | 0.56878 |
| PPP1R26    | -0.05 | 6.69  | -0.57 | 0.56891 |
| PDHB       | -0.04 | 8.67  | -0.57 | 0.56908 |
| CENPL      | -0.05 | 5.68  | -0.57 | 0.56915 |
| AC100786.1 | 0.07  | 6.45  | 0.57  | 0.56920 |
| TIAF1      | 0.06  | 6.06  | 0.57  | 0.56941 |
| H2AC11     | -0.07 | 5.79  | -0.57 | 0.56962 |
| SMIM20     | 0.04  | 7.26  | 0.57  | 0.56966 |
| GPR35      | 0.06  | 7.46  | 0.57  | 0.56969 |
| DND1       | 0.06  | 5.25  | 0.57  | 0.56974 |
| TRIAP1     | 0.05  | 7.80  | 0.57  | 0.56978 |
| ELOBP1     | 0.08  | 5.82  | 0.57  | 0.56993 |

|            |       |       |       |         |
|------------|-------|-------|-------|---------|
| BTG2       | -0.05 | 11.71 | -0.57 | 0.56993 |
| CDT1       | 0.08  | 5.99  | 0.57  | 0.56998 |
| OTUD3      | 0.05  | 6.59  | 0.57  | 0.57006 |
| RPS3AP5    | 0.08  | 6.74  | 0.57  | 0.57006 |
| NAP1L2     | -0.06 | 5.41  | -0.57 | 0.57020 |
| FZD5       | -0.06 | 5.16  | -0.57 | 0.57062 |
| TMEM199    | 0.04  | 8.03  | 0.57  | 0.57064 |
| STK40      | -0.06 | 11.92 | -0.57 | 0.57067 |
| CEP57L1    | -0.07 | 5.12  | -0.57 | 0.57077 |
| PAFAH1B2   | 0.04  | 9.69  | 0.57  | 0.57082 |
| YJEFN3     | -0.09 | 6.39  | -0.57 | 0.57106 |
| RBCK1      | -0.05 | 11.22 | -0.57 | 0.57111 |
| ZNF204P    | -0.06 | 5.51  | -0.57 | 0.57112 |
| SMARCC1    | -0.04 | 9.74  | -0.57 | 0.57115 |
| NSA2       | -0.05 | 9.96  | -0.57 | 0.57122 |
| FAM122C    | -0.06 | 6.01  | -0.57 | 0.57133 |
| HLA-DMA    | 0.07  | 10.96 | 0.57  | 0.57143 |
| AXL        | 0.07  | 5.08  | 0.57  | 0.57150 |
| ZNF585B    | -0.06 | 6.70  | -0.57 | 0.57154 |
| LACTB2     | 0.05  | 5.89  | 0.57  | 0.57159 |
| ENSAP2     | 0.05  | 5.84  | 0.57  | 0.57216 |
| MYO19      | 0.05  | 7.96  | 0.57  | 0.57218 |
| FUCA1      | -0.06 | 8.46  | -0.57 | 0.57222 |
| STPG1      | 0.05  | 6.23  | 0.57  | 0.57223 |
| GBP1P1     | -0.10 | 5.06  | -0.57 | 0.57230 |
| CAPN10     | 0.06  | 8.73  | 0.57  | 0.57231 |
| HLCS       | -0.04 | 6.64  | -0.57 | 0.57246 |
| FKBP3      | 0.04  | 8.00  | 0.57  | 0.57268 |
| IL3RA      | 0.09  | 8.08  | 0.57  | 0.57268 |
| TMEM9B-AS1 | 0.07  | 5.95  | 0.57  | 0.57279 |
| EI24       | 0.04  | 8.53  | 0.57  | 0.57282 |
| TRAV38-1   | 0.07  | 5.58  | 0.57  | 0.57325 |
| DOCK6      | -0.07 | 5.58  | -0.57 | 0.57327 |
| PNMA6A     | -0.09 | 5.13  | -0.57 | 0.57338 |
| UBAP1L     | -0.08 | 6.75  | -0.57 | 0.57345 |
| EOMES      | -0.07 | 8.69  | -0.57 | 0.57358 |
| HLA-DRB6   | -0.17 | 9.84  | -0.57 | 0.57362 |
| EPB41L2    | -0.07 | 6.75  | -0.57 | 0.57362 |
| DROSHA     | -0.04 | 8.30  | -0.57 | 0.57387 |
| PRSS30P    | 0.11  | 6.49  | 0.57  | 0.57419 |
| SPATA5L1   | -0.05 | 6.89  | -0.57 | 0.57425 |
| TSPAN14    | 0.04  | 11.98 | 0.57  | 0.57427 |
| MMACHC     | 0.06  | 5.92  | 0.56  | 0.57487 |
| GTF2IRD2B  | -0.06 | 6.33  | -0.56 | 0.57529 |
| TPPP       | 0.07  | 6.26  | 0.56  | 0.57531 |
| HS2ST1     | 0.06  | 6.95  | 0.56  | 0.57552 |
| MFSD11     | 0.04  | 7.70  | 0.56  | 0.57557 |
| DHX16      | -0.03 | 9.85  | -0.56 | 0.57558 |
| RNF165     | -0.09 | 6.08  | -0.56 | 0.57574 |
| CD160      | 0.09  | 7.45  | 0.56  | 0.57594 |

|            |       |       |       |         |
|------------|-------|-------|-------|---------|
| STAG3L1    | -0.08 | 5.23  | -0.56 | 0.57605 |
| DBH-AS1    | 0.09  | 5.88  | 0.56  | 0.57611 |
| ZNF397     | -0.04 | 8.49  | -0.56 | 0.57620 |
| ACP1       | -0.04 | 9.25  | -0.56 | 0.57632 |
| ST14       | 0.07  | 9.75  | 0.56  | 0.57633 |
| TMEM273    | -0.09 | 8.81  | -0.56 | 0.57645 |
| EEF1A1P12  | 0.06  | 7.74  | 0.56  | 0.57659 |
| SLC25A46   | -0.05 | 7.48  | -0.56 | 0.57662 |
| AC020978.7 | 0.06  | 4.97  | 0.56  | 0.57676 |
| AC006970.2 | 0.09  | 6.80  | 0.56  | 0.57677 |
| LSM3P3     | 0.06  | 5.18  | 0.56  | 0.57688 |
| MLH1       | 0.03  | 8.39  | 0.56  | 0.57688 |
| AL365203.2 | 0.07  | 6.45  | 0.56  | 0.57705 |
| GMPR       | 0.14  | 9.58  | 0.56  | 0.57711 |
| CCDC151    | -0.08 | 5.03  | -0.56 | 0.57731 |
| ZMYND10    | 0.06  | 5.99  | 0.56  | 0.57746 |
| PNMA1      | -0.04 | 8.50  | -0.56 | 0.57752 |
| DLG4       | 0.06  | 8.35  | 0.56  | 0.57755 |
| ZC3H15     | 0.04  | 8.47  | 0.56  | 0.57773 |
| SUMO1      | -0.04 | 9.12  | -0.56 | 0.57776 |
| JPX        | 0.06  | 8.12  | 0.56  | 0.57779 |
| DCTN6      | -0.05 | 6.58  | -0.56 | 0.57811 |
| ATP5F1AP10 | 0.05  | 5.12  | 0.56  | 0.57824 |
| AL049840.5 | -0.07 | 6.14  | -0.56 | 0.57827 |
| C14orf28   | 0.06  | 5.82  | 0.56  | 0.57847 |
| POLR1A     | -0.04 | 8.77  | -0.56 | 0.57858 |
| DGAT1      | 0.06  | 10.45 | 0.56  | 0.57861 |
| SPATA41    | 0.06  | 5.33  | 0.56  | 0.57869 |
| KIAA1324L  | 0.09  | 5.64  | 0.56  | 0.57879 |
| COL6A3     | 0.08  | 5.71  | 0.56  | 0.57894 |
| SLC12A7    | -0.10 | 10.14 | -0.56 | 0.57901 |
| RAP1GDS1   | -0.04 | 8.24  | -0.56 | 0.57905 |
| C12orf29   | -0.05 | 6.25  | -0.56 | 0.57911 |
| RABIF      | -0.04 | 8.02  | -0.56 | 0.57917 |
| AC232271.1 | -0.08 | 5.73  | -0.56 | 0.57920 |
| FAM111A-DT | -0.04 | 6.01  | -0.56 | 0.57959 |
| CD180      | 0.07  | 8.89  | 0.56  | 0.57963 |
| PPP1R2B    | -0.06 | 5.18  | -0.56 | 0.57965 |
| NEMP2      | -0.04 | 6.61  | -0.56 | 0.57965 |
| FAM131B    | -0.07 | 5.73  | -0.56 | 0.57970 |
| CHKA       | 0.05  | 6.94  | 0.56  | 0.57975 |
| MCEMP1     | -0.15 | 8.69  | -0.56 | 0.57975 |
| CLC        | 0.13  | 9.69  | 0.56  | 0.57992 |
| TBX19      | -0.05 | 6.54  | -0.56 | 0.57998 |
| NFATC3     | 0.04  | 10.48 | 0.56  | 0.58001 |
| ATAD1      | -0.05 | 7.54  | -0.56 | 0.58010 |
| PDE2A      | -0.07 | 5.64  | -0.56 | 0.58022 |
| AC090204.1 | -0.05 | 5.07  | -0.56 | 0.58035 |
| LINC00863  | -0.06 | 5.66  | -0.56 | 0.58069 |
| FAM120AOS  | 0.03  | 9.37  | 0.56  | 0.58083 |

|             |       |       |       |         |
|-------------|-------|-------|-------|---------|
| BUB3        | -0.03 | 9.57  | -0.56 | 0.58100 |
| ZFP36       | -0.06 | 11.64 | -0.56 | 0.58102 |
| MYL6P3      | 0.08  | 6.48  | 0.56  | 0.58103 |
| LSM1        | -0.04 | 8.33  | -0.56 | 0.58109 |
| PPP6R2      | 0.04  | 10.39 | 0.56  | 0.58117 |
| PPHLN1      | 0.03  | 8.84  | 0.56  | 0.58121 |
| ZC3H12A     | -0.04 | 8.33  | -0.55 | 0.58136 |
| CDK18       | 0.07  | 6.33  | 0.55  | 0.58142 |
| IGHV3-74    | 0.14  | 7.45  | 0.55  | 0.58146 |
| AP005482.2  | 0.08  | 5.56  | 0.55  | 0.58150 |
| ZNF717      | -0.06 | 5.90  | -0.55 | 0.58165 |
| AC005840.4  | -0.06 | 5.67  | -0.55 | 0.58167 |
| AC009974.1  | 0.08  | 4.94  | 0.55  | 0.58169 |
| CD1E        | 0.06  | 5.07  | 0.55  | 0.58172 |
| SIGLEC15    | -0.06 | 5.50  | -0.55 | 0.58178 |
| R3HCC1L     | -0.03 | 8.49  | -0.55 | 0.58181 |
| TMEM25      | 0.06  | 7.04  | 0.55  | 0.58185 |
| GZMB        | 0.10  | 11.19 | 0.55  | 0.58190 |
| ZNF284      | -0.05 | 5.72  | -0.55 | 0.58194 |
| COL8A2      | -0.06 | 6.05  | -0.55 | 0.58208 |
| CMIP        | -0.06 | 11.13 | -0.55 | 0.58212 |
| CASZ1       | -0.04 | 7.53  | -0.55 | 0.58214 |
| TRAV1-1     | 0.08  | 5.19  | 0.55  | 0.58221 |
| COX10-AS1   | -0.06 | 5.99  | -0.55 | 0.58230 |
| RCN1        | 0.06  | 6.75  | 0.55  | 0.58245 |
| GATA2       | -0.09 | 8.25  | -0.55 | 0.58249 |
| FBXO48      | -0.04 | 6.13  | -0.55 | 0.58258 |
| N4BP2L2-IT2 | -0.07 | 5.91  | -0.55 | 0.58268 |
| COX18       | 0.05  | 6.70  | 0.55  | 0.58274 |
| TNRC18      | -0.05 | 10.75 | -0.55 | 0.58288 |
| ABHD15      | 0.04  | 8.73  | 0.55  | 0.58289 |
| NTPCR       | -0.06 | 7.58  | -0.55 | 0.58290 |
| LRRC57      | -0.04 | 7.46  | -0.55 | 0.58300 |
| DENND4A     | -0.05 | 8.53  | -0.55 | 0.58307 |
| SLC6A12     | -0.06 | 6.79  | -0.55 | 0.58315 |
| VIM         | 0.05  | 14.60 | 0.55  | 0.58328 |
| VTI1B       | 0.04  | 9.61  | 0.55  | 0.58334 |
| TTLL4       | -0.05 | 8.91  | -0.55 | 0.58345 |
| TCEAL4      | 0.06  | 7.30  | 0.55  | 0.58348 |
| AL390728.6  | -0.07 | 6.36  | -0.55 | 0.58349 |
| PSD         | 0.08  | 5.71  | 0.55  | 0.58367 |
| EDC4        | -0.04 | 9.79  | -0.55 | 0.58376 |
| GTF3C2      | -0.03 | 9.69  | -0.55 | 0.58379 |
| TBC1D12     | -0.06 | 5.28  | -0.55 | 0.58390 |
| ACADM       | -0.06 | 7.00  | -0.55 | 0.58406 |
| USP6NL      | -0.06 | 6.75  | -0.55 | 0.58446 |
| IGHV5-78    | 0.07  | 5.25  | 0.55  | 0.58457 |
| EML2        | 0.03  | 9.20  | 0.55  | 0.58460 |
| OGFOD1      | 0.05  | 8.45  | 0.55  | 0.58472 |
| KIF19       | -0.09 | 5.79  | -0.55 | 0.58475 |



|            |       |       |       |         |
|------------|-------|-------|-------|---------|
| ATP5F1AP7  | 0.06  | 5.08  | 0.55  | 0.58481 |
| MCCC1      | -0.03 | 7.83  | -0.55 | 0.58481 |
| HSPD1P4    | 0.07  | 5.28  | 0.55  | 0.58496 |
| AC126773.5 | -0.05 | 5.14  | -0.55 | 0.58503 |
| AC009948.2 | 0.07  | 5.55  | 0.55  | 0.58509 |
| HNRNPLP2   | 0.07  | 7.22  | 0.55  | 0.58537 |
| SIGLEC5    | 0.09  | 6.58  | 0.55  | 0.58559 |
| IRF5       | -0.06 | 9.94  | -0.55 | 0.58563 |
| TMEM186    | 0.05  | 7.34  | 0.55  | 0.58564 |
| AC078819.1 | -0.05 | 5.75  | -0.55 | 0.58577 |
| JAKMIP3    | 0.07  | 4.96  | 0.55  | 0.58580 |
| TUBGCP5    | -0.06 | 6.79  | -0.55 | 0.58601 |
| CYB5B      | -0.03 | 8.87  | -0.55 | 0.58606 |
| LOXL1-AS1  | 0.05  | 6.47  | 0.55  | 0.58639 |
| ACTBP2     | -0.08 | 8.75  | -0.55 | 0.58640 |
| GOLGA3     | 0.03  | 9.92  | 0.55  | 0.58642 |
| RAD51-AS1  | -0.07 | 7.00  | -0.55 | 0.58660 |
| IGKV1D-27  | -0.07 | 5.05  | -0.55 | 0.58664 |
| ANKDD1A    | 0.08  | 5.80  | 0.55  | 0.58667 |
| CORO2B     | 0.10  | 5.70  | 0.55  | 0.58675 |
| ISG15      | -0.17 | 9.72  | -0.55 | 0.58684 |
| EEF1A1P9   | 0.07  | 8.02  | 0.55  | 0.58687 |
| AC023157.3 | 0.09  | 7.54  | 0.55  | 0.58698 |
| CENPH      | -0.06 | 5.79  | -0.55 | 0.58705 |
| NUMBL      | 0.06  | 7.09  | 0.55  | 0.58707 |
| POPDC2     | 0.06  | 5.85  | 0.55  | 0.58729 |
| SLC25A25   | 0.04  | 8.26  | 0.55  | 0.58731 |
| AC025518.1 | 0.10  | 5.54  | 0.55  | 0.58738 |
| DNAJC3-DT  | 0.06  | 5.95  | 0.55  | 0.58746 |
| IGHV3-72   | 0.12  | 5.88  | 0.55  | 0.58746 |
| POLR2D     | -0.04 | 7.84  | -0.55 | 0.58756 |
| CPT1B      | 0.07  | 5.38  | 0.55  | 0.58765 |
| PIGG       | -0.05 | 8.99  | -0.55 | 0.58769 |
| ZNRF2      | 0.06  | 6.26  | 0.55  | 0.58775 |
| LPCAT3     | -0.05 | 9.61  | -0.55 | 0.58786 |
| TRG-AS1    | -0.05 | 8.18  | -0.55 | 0.58797 |
| GAPDHP1    | 0.08  | 8.43  | 0.55  | 0.58798 |
| DYNLL1     | 0.05  | 10.40 | 0.55  | 0.58804 |
| ZNF595     | -0.06 | 6.30  | -0.54 | 0.58818 |
| IL12RB1    | 0.05  | 9.79  | 0.54  | 0.58822 |
| HMGN2P5    | 0.08  | 7.96  | 0.54  | 0.58832 |
| NCAPD2     | -0.03 | 10.00 | -0.54 | 0.58834 |
| SLC35F2    | -0.05 | 5.92  | -0.54 | 0.58835 |
| LMBR1      | -0.04 | 7.53  | -0.54 | 0.58852 |
| FKBP1A     | -0.05 | 11.51 | -0.54 | 0.58890 |
| WASH5P     | -0.08 | 5.19  | -0.54 | 0.58896 |
| RNPEP      | 0.05  | 10.71 | 0.54  | 0.58897 |
| TMPRSS13   | 0.06  | 6.13  | 0.54  | 0.58901 |
| SKP1       | 0.04  | 10.07 | 0.54  | 0.58904 |
| KHDRBS1    | -0.03 | 10.45 | -0.54 | 0.58905 |

|            |       |       |       |         |
|------------|-------|-------|-------|---------|
| PANX2      | -0.10 | 8.36  | -0.54 | 0.58933 |
| AC009403.1 | -0.05 | 5.48  | -0.54 | 0.58935 |
| AC105219.1 | 0.05  | 5.65  | 0.54  | 0.58936 |
| HOMER3     | 0.07  | 7.71  | 0.54  | 0.58971 |
| ALG2       | -0.04 | 7.73  | -0.54 | 0.58993 |
| RNF14      | -0.06 | 7.45  | -0.54 | 0.59008 |
| TMEM106A   | 0.05  | 8.07  | 0.54  | 0.59020 |
| HLA-DQB2   | 0.16  | 8.53  | 0.54  | 0.59031 |
| CDCA7L     | 0.06  | 7.90  | 0.54  | 0.59044 |
| DPY19L1    | -0.05 | 7.30  | -0.54 | 0.59053 |
| DAPK2      | -0.09 | 9.52  | -0.54 | 0.59068 |
| TRAV30     | -0.06 | 5.16  | -0.54 | 0.59076 |
| TMEM176A   | 0.22  | 9.10  | 0.54  | 0.59089 |
| LINC01503  | -0.07 | 7.10  | -0.54 | 0.59099 |
| ERCC4      | -0.04 | 6.03  | -0.54 | 0.59101 |
| HERC2P3    | -0.10 | 5.41  | -0.54 | 0.59130 |
| PIP5K1B    | -0.07 | 6.21  | -0.54 | 0.59131 |
| ST13P18    | 0.06  | 5.57  | 0.54  | 0.59138 |
| ZFYVE19    | 0.05  | 8.95  | 0.54  | 0.59149 |
| NDUFA5     | 0.04  | 7.41  | 0.54  | 0.59150 |
| PARM1      | -0.08 | 5.61  | -0.54 | 0.59151 |
| DR1        | -0.03 | 9.30  | -0.54 | 0.59155 |
| AL136116.3 | 0.05  | 5.33  | 0.54  | 0.59155 |
| HOMEZ      | -0.04 | 7.66  | -0.54 | 0.59157 |
| CALHM6     | -0.08 | 5.79  | -0.54 | 0.59159 |
| AC010328.2 | -0.05 | 5.19  | -0.54 | 0.59160 |
| TMEM179B   | 0.04  | 9.32  | 0.54  | 0.59164 |
| PSD4       | 0.04  | 12.38 | 0.54  | 0.59174 |
| ZNHIT6     | 0.05  | 6.88  | 0.54  | 0.59181 |
| TRAPPC5    | -0.05 | 6.10  | -0.54 | 0.59195 |
| EEF1A1P16  | 0.07  | 6.92  | 0.54  | 0.59200 |
| FDFT1      | 0.04  | 10.35 | 0.54  | 0.59208 |
| ZDHHC3     | -0.04 | 9.91  | -0.54 | 0.59241 |
| WDR89      | 0.06  | 7.33  | 0.54  | 0.59243 |
| ADGRD1     | -0.08 | 6.17  | -0.54 | 0.59254 |
| MYL12BP2   | -0.07 | 5.95  | -0.54 | 0.59258 |
| FTLP2      | 0.08  | 7.51  | 0.54  | 0.59262 |
| AL118516.1 | 0.05  | 5.40  | 0.54  | 0.59263 |
| MEGF8      | 0.04  | 7.94  | 0.54  | 0.59295 |
| ATP6V1H    | 0.03  | 8.56  | 0.54  | 0.59298 |
| KANSL1-AS1 | 0.10  | 6.57  | 0.54  | 0.59307 |
| MTRNR2L8   | 0.10  | 7.76  | 0.54  | 0.59309 |
| AC010733.1 | 0.06  | 5.05  | 0.54  | 0.59322 |
| CD48       | 0.05  | 11.66 | 0.54  | 0.59359 |
| CENPBD1P1  | 0.05  | 8.37  | 0.54  | 0.59386 |
| CCDC180    | -0.07 | 5.31  | -0.54 | 0.59408 |
| ZNF33B     | 0.05  | 7.85  | 0.54  | 0.59437 |
| ATP5F1C    | -0.04 | 10.10 | -0.54 | 0.59459 |
| SLC11A1    | -0.11 | 12.83 | -0.54 | 0.59460 |
| CIAO2A     | -0.04 | 8.10  | -0.54 | 0.59461 |

|             |       |       |       |         |
|-------------|-------|-------|-------|---------|
| S100A12     | -0.11 | 11.16 | -0.54 | 0.59479 |
| PWP1        | 0.04  | 8.49  | 0.53  | 0.59508 |
| SMARCE1     | -0.05 | 5.82  | -0.53 | 0.59510 |
| MRPS35      | 0.04  | 8.16  | 0.53  | 0.59517 |
| IBTK        | -0.05 | 7.50  | -0.53 | 0.59550 |
| PTPN4       | -0.05 | 8.76  | -0.53 | 0.59550 |
| LITAF       | -0.07 | 13.37 | -0.53 | 0.59553 |
| KBTBD7      | -0.07 | 7.60  | -0.53 | 0.59562 |
| XK          | 0.11  | 6.34  | 0.53  | 0.59569 |
| TRBV4-2     | 0.11  | 6.68  | 0.53  | 0.59571 |
| ATP1B3P1    | 0.06  | 5.03  | 0.53  | 0.59573 |
| HNRNPLP1    | 0.05  | 5.65  | 0.53  | 0.59574 |
| WDR1        | 0.04  | 13.21 | 0.53  | 0.59577 |
| HM13        | 0.05  | 10.97 | 0.53  | 0.59581 |
| PLB1        | -0.08 | 9.01  | -0.53 | 0.59591 |
| ULK1        | -0.07 | 10.86 | -0.53 | 0.59602 |
| CCDC30      | 0.06  | 5.89  | 0.53  | 0.59608 |
| AC100771.1  | 0.06  | 5.63  | 0.53  | 0.59641 |
| IGHV1-24    | 0.08  | 5.59  | 0.53  | 0.59665 |
| ZFP64       | 0.04  | 7.45  | 0.53  | 0.59700 |
| SLC25A5-AS1 | 0.05  | 5.27  | 0.53  | 0.59704 |
| UNG         | 0.05  | 7.60  | 0.53  | 0.59705 |
| IFT172      | 0.04  | 7.44  | 0.53  | 0.59708 |
| GTF3C4      | -0.04 | 7.27  | -0.53 | 0.59723 |
| HGS         | 0.04  | 10.61 | 0.53  | 0.59723 |
| PROB1       | 0.06  | 5.34  | 0.53  | 0.59731 |
| USP22       | -0.03 | 10.99 | -0.53 | 0.59735 |
| OSER1-DT    | 0.05  | 7.68  | 0.53  | 0.59750 |
| PILRA       | -0.07 | 11.99 | -0.53 | 0.59758 |
| SCAPER      | 0.04  | 7.19  | 0.53  | 0.59762 |
| PTAFR       | -0.07 | 12.86 | -0.53 | 0.59785 |
| TYK2        | -0.05 | 12.20 | -0.53 | 0.59795 |
| FBXW9       | 0.06  | 6.69  | 0.53  | 0.59799 |
| LRRC14      | 0.04  | 8.74  | 0.53  | 0.59821 |
| NDUFC2      | 0.06  | 7.40  | 0.53  | 0.59824 |
| ZNF548      | -0.05 | 6.81  | -0.53 | 0.59834 |
| ZNF138      | -0.05 | 5.88  | -0.53 | 0.59853 |
| ATP5PB      | 0.03  | 10.37 | 0.53  | 0.59857 |
| RAPGEF3     | 0.08  | 5.01  | 0.53  | 0.59858 |
| TIRAP       | 0.05  | 7.51  | 0.53  | 0.59866 |
| LINC02458   | -0.07 | 5.13  | -0.53 | 0.59869 |
| DUSP22      | -0.04 | 10.20 | -0.53 | 0.59884 |
| AC114801.3  | 0.06  | 5.26  | 0.53  | 0.59911 |
| ZNF74       | 0.05  | 7.22  | 0.53  | 0.59914 |
| GLIPR2      | -0.06 | 11.76 | -0.53 | 0.59914 |
| AL121723.1  | -0.09 | 6.59  | -0.53 | 0.59917 |
| RPS26P15    | 0.11  | 5.71  | 0.53  | 0.59928 |
| RPS8P10     | 0.05  | 5.41  | 0.53  | 0.59948 |
| VPS35       | 0.04  | 10.13 | 0.53  | 0.59981 |
| CD300LF     | -0.06 | 10.36 | -0.53 | 0.59989 |

|            |       |       |       |         |
|------------|-------|-------|-------|---------|
| WDR4       | 0.05  | 7.01  | 0.53  | 0.59995 |
| NLRP2      | 0.11  | 6.84  | 0.53  | 0.60000 |
| CLCF1      | -0.06 | 7.19  | -0.53 | 0.60010 |
| CDK10      | 0.06  | 9.60  | 0.53  | 0.60059 |
| IGLV2-14   | 0.12  | 8.92  | 0.53  | 0.60074 |
| AK2        | -0.03 | 9.69  | -0.53 | 0.60079 |
| ITPKB-IT1  | 0.06  | 5.82  | 0.53  | 0.60084 |
| FAIM       | -0.06 | 5.33  | -0.53 | 0.60110 |
| GIMAP4     | -0.04 | 12.00 | -0.53 | 0.60110 |
| ERGIC1     | -0.08 | 11.87 | -0.53 | 0.60113 |
| SDHAF3     | -0.05 | 6.20  | -0.53 | 0.60115 |
| HAUS2      | -0.04 | 6.97  | -0.53 | 0.60120 |
| PLCB2      | -0.05 | 12.38 | -0.53 | 0.60122 |
| BX571818.1 | 0.07  | 5.33  | 0.53  | 0.60130 |
| RPN2       | 0.04  | 11.47 | 0.53  | 0.60145 |
| EEF1A1P24  | 0.05  | 5.53  | 0.53  | 0.60158 |
| RN7SL473P  | -0.08 | 5.42  | -0.53 | 0.60159 |
| PCYOX1L    | -0.04 | 8.12  | -0.52 | 0.60196 |
| TBC1D3K    | -0.06 | 6.39  | -0.52 | 0.60200 |
| AC079905.1 | 0.06  | 5.43  | 0.52  | 0.60200 |
| METTTL2A   | 0.05  | 7.04  | 0.52  | 0.60203 |
| MICAL1     | 0.05  | 11.60 | 0.52  | 0.60212 |
| ASF1A      | 0.05  | 7.40  | 0.52  | 0.60229 |
| RAB3IL1    | 0.12  | 6.36  | 0.52  | 0.60245 |
| NLRP12     | -0.07 | 10.73 | -0.52 | 0.60246 |
| RNASEH2B   | 0.04  | 8.78  | 0.52  | 0.60251 |
| PARN       | -0.03 | 8.99  | -0.52 | 0.60251 |
| GSTO1      | 0.06  | 9.53  | 0.52  | 0.60256 |
| SLC22A18AS | -0.07 | 5.15  | -0.52 | 0.60285 |
| TBKBP1     | -0.08 | 9.42  | -0.52 | 0.60302 |
| DHX36      | -0.04 | 7.93  | -0.52 | 0.60302 |
| HSPA8P9    | -0.07 | 6.17  | -0.52 | 0.60305 |
| CSF3R      | -0.09 | 15.89 | -0.52 | 0.60305 |
| CWC25      | 0.05  | 9.43  | 0.52  | 0.60308 |
| HFE        | -0.06 | 6.48  | -0.52 | 0.60310 |
| PRPF40B    | 0.05  | 6.75  | 0.52  | 0.60325 |
| TMEM14B    | -0.04 | 7.44  | -0.52 | 0.60326 |
| SLC4A3     | 0.07  | 5.62  | 0.52  | 0.60329 |
| MARCHF8    | 0.10  | 11.32 | 0.52  | 0.60330 |
| AC012636.1 | -0.06 | 4.96  | -0.52 | 0.60355 |
| ANKRD52    | 0.03  | 9.49  | 0.52  | 0.60355 |
| RAB43      | -0.07 | 6.27  | -0.52 | 0.60356 |
| AL512649.1 | -0.06 | 5.18  | -0.52 | 0.60359 |
| DCAF5      | -0.03 | 9.84  | -0.52 | 0.60360 |
| AP004609.5 | -0.04 | 5.54  | -0.52 | 0.60367 |
| SELENOS    | -0.05 | 8.32  | -0.52 | 0.60387 |
| AP000944.7 | -0.06 | 4.96  | -0.52 | 0.60427 |
| SLC2A3P2   | -0.08 | 5.05  | -0.52 | 0.60440 |
| SNUPN      | -0.04 | 7.26  | -0.52 | 0.60448 |
| DELE1      | 0.03  | 9.65  | 0.52  | 0.60450 |

|            |       |       |       |         |
|------------|-------|-------|-------|---------|
| WASH4P     | 0.06  | 5.21  | 0.52  | 0.60467 |
| AL158201.1 | -0.08 | 6.76  | -0.52 | 0.60481 |
| SORD       | -0.04 | 7.34  | -0.52 | 0.60481 |
| EEF1AKMT3  | 0.06  | 5.41  | 0.52  | 0.60486 |
| AC022211.3 | -0.06 | 4.93  | -0.52 | 0.60501 |
| AC096921.2 | 0.05  | 5.26  | 0.52  | 0.60510 |
| ALDH2      | -0.06 | 10.01 | -0.52 | 0.60515 |
| RPL23AP7   | 0.09  | 6.52  | 0.52  | 0.60545 |
| MAN2C1     | -0.06 | 10.63 | -0.52 | 0.60549 |
| ZIK1       | -0.06 | 6.21  | -0.52 | 0.60553 |
| TRMO       | 0.03  | 7.91  | 0.52  | 0.60560 |
| RASGRP3    | -0.06 | 6.72  | -0.52 | 0.60561 |
| ATPCKMT    | -0.04 | 6.22  | -0.52 | 0.60575 |
| SPPL3      | 0.03  | 9.48  | 0.52  | 0.60577 |
| CAMK4      | -0.07 | 8.27  | -0.52 | 0.60580 |
| AC084198.4 | 0.05  | 5.66  | 0.52  | 0.60581 |
| SLAMF7     | -0.06 | 9.98  | -0.52 | 0.60581 |
| RIMBP3     | 0.06  | 5.72  | 0.52  | 0.60595 |
| KCNMB1     | -0.08 | 7.03  | -0.52 | 0.60597 |
| VMA21      | -0.05 | 8.21  | -0.52 | 0.60609 |
| UPF2       | 0.05  | 9.70  | 0.52  | 0.60610 |
| FAM136A    | -0.04 | 7.58  | -0.52 | 0.60614 |
| BMI1       | 0.06  | 6.95  | 0.52  | 0.60618 |
| CUTC       | -0.03 | 8.11  | -0.52 | 0.60619 |
| INTS12     | -0.04 | 7.52  | -0.52 | 0.60639 |
| KDM5D      | -0.30 | 8.23  | -0.52 | 0.60656 |
| ZNF142     | 0.04  | 8.90  | 0.52  | 0.60656 |
| LRMDA      | -0.09 | 7.18  | -0.52 | 0.60656 |
| MAPK8IP3   | 0.07  | 10.12 | 0.52  | 0.60659 |
| FBXO33     | 0.05  | 8.92  | 0.52  | 0.60660 |
| NAV1       | 0.06  | 6.63  | 0.52  | 0.60668 |
| TARS1      | -0.04 | 8.87  | -0.52 | 0.60672 |
| PAG1       | 0.05  | 9.53  | 0.52  | 0.60677 |
| ELMO1      | -0.04 | 10.47 | -0.52 | 0.60692 |
| SBK1       | 0.05  | 9.07  | 0.52  | 0.60695 |
| SLAMF8     | -0.08 | 6.80  | -0.52 | 0.60703 |
| MTDH       | 0.05  | 9.79  | 0.52  | 0.60705 |
| PEX5       | -0.03 | 8.47  | -0.52 | 0.60709 |
| RPAIN      | 0.04  | 8.29  | 0.52  | 0.60713 |
| ZNF184     | -0.05 | 6.64  | -0.52 | 0.60733 |
| CNP        | 0.05  | 9.85  | 0.52  | 0.60745 |
| ERO1A      | -0.04 | 9.46  | -0.52 | 0.60784 |
| SUSD2      | 0.06  | 5.13  | 0.52  | 0.60793 |
| C1QTNF6    | 0.08  | 6.78  | 0.52  | 0.60796 |
| AL691432.2 | 0.04  | 6.40  | 0.52  | 0.60796 |
| ZNF578     | -0.06 | 4.97  | -0.52 | 0.60800 |
| UBA52P3    | 0.06  | 6.30  | 0.52  | 0.60802 |
| UCN        | 0.06  | 5.19  | 0.52  | 0.60802 |
| DNAAF2     | -0.06 | 5.73  | -0.52 | 0.60810 |
| IMMT       | 0.03  | 9.59  | 0.52  | 0.60816 |

|             |       |       |       |         |
|-------------|-------|-------|-------|---------|
| ZNF486      | -0.06 | 6.23  | -0.52 | 0.60823 |
| GNE         | -0.05 | 6.97  | -0.52 | 0.60831 |
| AEBP2       | -0.05 | 6.89  | -0.52 | 0.60838 |
| GNAQ        | -0.06 | 9.32  | -0.52 | 0.60840 |
| MTRNR2L1    | 0.19  | 6.83  | 0.52  | 0.60862 |
| ZNF259P1    | -0.06 | 5.04  | -0.52 | 0.60862 |
| PRKAR2A-AS1 | -0.05 | 5.17  | -0.52 | 0.60867 |
| ADGRG3      | -0.10 | 12.23 | -0.52 | 0.60872 |
| ACTBP7      | 0.04  | 5.10  | 0.51  | 0.60877 |
| AC016734.1  | 0.07  | 7.32  | 0.51  | 0.60891 |
| LINC01353   | -0.06 | 4.93  | -0.51 | 0.60903 |
| ZDHHC16     | 0.04  | 8.13  | 0.51  | 0.60908 |
| ZNF425      | 0.05  | 5.63  | 0.51  | 0.60920 |
| TMPO-AS1    | -0.05 | 5.70  | -0.51 | 0.60926 |
| COPRS       | 0.06  | 6.60  | 0.51  | 0.60935 |
| HEXD-IT1    | -0.06 | 4.92  | -0.51 | 0.60939 |
| ACER3       | 0.05  | 7.78  | 0.51  | 0.60942 |
| TIMM17BP1   | 0.05  | 5.11  | 0.51  | 0.60951 |
| SUOX        | -0.05 | 7.40  | -0.51 | 0.60973 |
| NT5DC3      | -0.06 | 6.37  | -0.51 | 0.60981 |
| RIBC1       | -0.05 | 5.01  | -0.51 | 0.60983 |
| OSM         | -0.09 | 6.71  | -0.51 | 0.60986 |
| AC097263.1  | 0.07  | 5.33  | 0.51  | 0.61000 |
| ZKSCAN1     | -0.04 | 8.73  | -0.51 | 0.61002 |
| POTEG       | -0.04 | 4.98  | -0.51 | 0.61027 |
| TARDBP      | -0.03 | 9.43  | -0.51 | 0.61039 |
| SMYD4       | 0.05  | 7.66  | 0.51  | 0.61045 |
| AP003084.1  | 0.05  | 5.09  | 0.51  | 0.61054 |
| ADH5P4      | -0.06 | 5.29  | -0.51 | 0.61071 |
| ADPRHL1     | 0.06  | 5.14  | 0.51  | 0.61073 |
| HMGB1       | -0.03 | 10.37 | -0.51 | 0.61075 |
| HDAC1       | 0.02  | 10.95 | 0.51  | 0.61086 |
| LINC00685   | 0.09  | 5.73  | 0.51  | 0.61094 |
| FTO         | -0.04 | 7.80  | -0.51 | 0.61106 |
| MMS19       | 0.04  | 9.76  | 0.51  | 0.61114 |
| ZSCAN9      | -0.05 | 6.71  | -0.51 | 0.61120 |
| INPPL1      | -0.04 | 10.88 | -0.51 | 0.61122 |
| FUNDC2P1    | -0.06 | 5.01  | -0.51 | 0.61126 |
| AC098859.1  | 0.06  | 5.32  | 0.51  | 0.61131 |
| PDLIM7      | 0.07  | 11.02 | 0.51  | 0.61131 |
| PRKRA       | -0.04 | 7.19  | -0.51 | 0.61141 |
| UNC93B1     | -0.06 | 10.92 | -0.51 | 0.61152 |
| PARD3       | 0.06  | 5.95  | 0.51  | 0.61155 |
| TPM3P8      | -0.05 | 5.76  | -0.51 | 0.61165 |
| IP6K1       | -0.04 | 10.98 | -0.51 | 0.61179 |
| HNRNPA1P39  | 0.05  | 5.14  | 0.51  | 0.61189 |
| LRP5L       | 0.06  | 6.99  | 0.51  | 0.61204 |
| TRBJ1-2     | -0.07 | 5.24  | -0.51 | 0.61205 |
| CCDC102B    | -0.05 | 5.16  | -0.51 | 0.61216 |
| ELP4        | 0.04  | 7.22  | 0.51  | 0.61218 |

|            |       |       |       |         |
|------------|-------|-------|-------|---------|
| ZNF213-AS1 | 0.05  | 7.19  | 0.51  | 0.61218 |
| THOC1      | -0.04 | 7.78  | -0.51 | 0.61238 |
| AC012066.1 | 0.06  | 5.03  | 0.51  | 0.61256 |
| KIAA1328   | 0.05  | 6.08  | 0.51  | 0.61267 |
| SEM1P1     | 0.06  | 5.00  | 0.51  | 0.61271 |
| USF1       | -0.04 | 11.14 | -0.51 | 0.61274 |
| COLGALT1   | -0.03 | 10.48 | -0.51 | 0.61280 |
| DHCR24     | 0.07  | 7.04  | 0.51  | 0.61286 |
| NUP85      | -0.03 | 9.00  | -0.51 | 0.61293 |
| LINC01135  | -0.06 | 4.94  | -0.51 | 0.61326 |
| SPHK1      | 0.06  | 7.11  | 0.51  | 0.61333 |
| SMN1       | -0.06 | 6.04  | -0.51 | 0.61333 |
| RAB24      | -0.07 | 7.86  | -0.51 | 0.61333 |
| SRF        | 0.03  | 9.92  | 0.51  | 0.61350 |
| PTPN6      | 0.04  | 13.69 | 0.51  | 0.61351 |
| IBA57      | 0.04  | 7.41  | 0.51  | 0.61363 |
| VTI1BP1    | -0.05 | 5.39  | -0.51 | 0.61371 |
| AC009951.6 | -0.06 | 5.22  | -0.51 | 0.61376 |
| AC092919.3 | 0.05  | 5.51  | 0.51  | 0.61387 |
| NUDT6      | -0.05 | 5.13  | -0.51 | 0.61411 |
| KLF7       | 0.06  | 9.09  | 0.51  | 0.61421 |
| BICRA      | 0.03  | 8.71  | 0.51  | 0.61429 |
| PLPBP      | -0.03 | 8.89  | -0.51 | 0.61447 |
| AL627309.7 | -0.11 | 8.79  | -0.51 | 0.61451 |
| DNASE1     | 0.04  | 9.03  | 0.51  | 0.61460 |
| GHITM      | -0.03 | 10.38 | -0.51 | 0.61460 |
| ZNF682     | -0.05 | 5.66  | -0.51 | 0.61464 |
| CEACAM8    | -0.15 | 6.36  | -0.51 | 0.61474 |
| LINC00539  | 0.06  | 5.71  | 0.51  | 0.61475 |
| AC008764.6 | 0.06  | 5.23  | 0.51  | 0.61477 |
| MED4       | -0.03 | 8.74  | -0.51 | 0.61508 |
| COG7       | 0.03  | 8.31  | 0.51  | 0.61526 |
| INTS14     | 0.03  | 8.30  | 0.51  | 0.61546 |
| MAN1B1-DT  | 0.05  | 5.54  | 0.51  | 0.61554 |
| HMGB1P10   | 0.05  | 5.49  | 0.51  | 0.61556 |
| TRAPPC2    | -0.04 | 7.61  | -0.51 | 0.61558 |
| YWHAE      | -0.04 | 11.02 | -0.51 | 0.61559 |
| LINC02384  | 0.08  | 6.67  | 0.50  | 0.61576 |
| ETFBKMT    | 0.05  | 5.06  | 0.50  | 0.61617 |
| AC108704.2 | 0.09  | 5.67  | 0.50  | 0.61617 |
| MIEF2      | 0.04  | 7.12  | 0.50  | 0.61627 |
| LINC01547  | 0.06  | 5.06  | 0.50  | 0.61633 |
| C10orf88   | -0.05 | 6.16  | -0.50 | 0.61636 |
| SYK        | -0.04 | 12.00 | -0.50 | 0.61639 |
| TMC4       | -0.09 | 6.29  | -0.50 | 0.61641 |
| Z97353.1   | 0.04  | 5.14  | 0.50  | 0.61663 |
| EXTL3      | -0.06 | 10.31 | -0.50 | 0.61668 |
| INO80C     | 0.04  | 7.20  | 0.50  | 0.61703 |
| LEF1       | 0.08  | 10.14 | 0.50  | 0.61706 |
| FICD       | -0.04 | 6.66  | -0.50 | 0.61715 |

|            |       |       |       |         |
|------------|-------|-------|-------|---------|
| KIF21B     | -0.04 | 11.31 | -0.50 | 0.61741 |
| RPL34P6    | 0.05  | 5.51  | 0.50  | 0.61756 |
| UBXN11     | 0.06  | 10.56 | 0.50  | 0.61758 |
| IDNK       | -0.05 | 6.33  | -0.50 | 0.61769 |
| IGKV1D-39  | -0.09 | 6.62  | -0.50 | 0.61786 |
| SRSF11     | 0.05  | 10.09 | 0.50  | 0.61799 |
| AC005070.3 | 0.08  | 5.29  | 0.50  | 0.61810 |
| AP002761.4 | -0.07 | 7.22  | -0.50 | 0.61830 |
| TLE3       | -0.07 | 12.31 | -0.50 | 0.61834 |
| PSMG2      | 0.03  | 8.87  | 0.50  | 0.61839 |
| AC018735.1 | -0.05 | 5.11  | -0.50 | 0.61841 |
| C2orf69    | -0.05 | 6.24  | -0.50 | 0.61847 |
| CDK2       | -0.04 | 7.06  | -0.50 | 0.61874 |
| AC007383.1 | 0.06  | 5.52  | 0.50  | 0.61885 |
| MTRNR2L6   | -0.06 | 5.21  | -0.50 | 0.61887 |
| LRRC61     | 0.05  | 7.40  | 0.50  | 0.61893 |
| PRKCZ-AS1  | 0.05  | 5.36  | 0.50  | 0.61894 |
| AL121603.2 | -0.05 | 6.02  | -0.50 | 0.61907 |
| TMEM170A   | 0.04  | 7.62  | 0.50  | 0.61917 |
| CAB39L     | -0.04 | 6.19  | -0.50 | 0.61927 |
| ACAD9      | 0.04  | 8.68  | 0.50  | 0.61928 |
| TRBV23-1   | 0.07  | 5.19  | 0.50  | 0.61928 |
| COQ10A     | 0.05  | 6.88  | 0.50  | 0.61931 |
| UTP18      | 0.04  | 8.02  | 0.50  | 0.61951 |
| SPCS2      | 0.04  | 8.12  | 0.50  | 0.61991 |
| CCNJL      | -0.10 | 9.61  | -0.50 | 0.61991 |
| TBC1D9B    | -0.03 | 10.51 | -0.50 | 0.61993 |
| TNIP3      | 0.06  | 5.14  | 0.50  | 0.61995 |
| TMCC1-AS1  | 0.06  | 5.06  | 0.50  | 0.61996 |
| HAT1       | -0.04 | 7.91  | -0.50 | 0.62005 |
| ZNF658     | -0.05 | 5.20  | -0.50 | 0.62008 |
| USP4       | -0.04 | 11.02 | -0.50 | 0.62008 |
| RBM23      | -0.04 | 10.82 | -0.50 | 0.62024 |
| WWC2       | -0.07 | 5.30  | -0.50 | 0.62025 |
| MYL6P4     | 0.06  | 5.13  | 0.50  | 0.62030 |
| RGL3       | -0.09 | 5.85  | -0.50 | 0.62030 |
| TOB2       | -0.03 | 9.76  | -0.50 | 0.62037 |
| SETMAR     | 0.04  | 6.21  | 0.50  | 0.62040 |
| LSG1       | 0.03  | 8.96  | 0.50  | 0.62040 |
| BAIAP3     | -0.10 | 8.61  | -0.50 | 0.62060 |
| QRSL1      | -0.04 | 7.75  | -0.50 | 0.62061 |
| ACSM3      | -0.05 | 6.49  | -0.50 | 0.62073 |
| DYNC2H1    | -0.05 | 5.19  | -0.50 | 0.62078 |
| AL354798.1 | 0.05  | 5.04  | 0.50  | 0.62087 |
| LINC02397  | 0.06  | 5.28  | 0.50  | 0.62100 |
| EXOSC8     | 0.05  | 7.44  | 0.50  | 0.62120 |
| UFSP2      | 0.05  | 7.29  | 0.50  | 0.62128 |
| RAB11FIP5  | 0.07  | 7.90  | 0.50  | 0.62128 |
| CMTM8      | -0.08 | 5.78  | -0.50 | 0.62130 |
| DOLPP1     | 0.04  | 7.47  | 0.50  | 0.62133 |



|            |       |       |       |         |
|------------|-------|-------|-------|---------|
| SMIM26     | 0.05  | 7.12  | 0.50  | 0.62138 |
| IGHV3-43   | 0.13  | 6.21  | 0.50  | 0.62141 |
| ZBTB41     | -0.05 | 5.82  | -0.50 | 0.62156 |
| LY6G5B     | -0.07 | 6.34  | -0.50 | 0.62157 |
| SBNO1-AS1  | 0.06  | 5.35  | 0.50  | 0.62191 |
| MNAT1      | -0.05 | 5.69  | -0.50 | 0.62197 |
| IGHV1-2    | -0.17 | 7.51  | -0.50 | 0.62199 |
| KIR3DL1    | 0.09  | 7.25  | 0.50  | 0.62213 |
| GCNT1      | -0.05 | 7.11  | -0.50 | 0.62241 |
| AGAP9      | 0.08  | 5.91  | 0.50  | 0.62243 |
| PPIAP29    | -0.05 | 6.77  | -0.49 | 0.62270 |
| HCG25      | -0.06 | 5.01  | -0.49 | 0.62277 |
| SERTAD3    | 0.05  | 8.74  | 0.49  | 0.62283 |
| SEMA4A     | 0.06  | 11.37 | 0.49  | 0.62296 |
| RPL23AP82  | 0.05  | 6.67  | 0.49  | 0.62303 |
| TMX2       | 0.03  | 9.21  | 0.49  | 0.62304 |
| LENG8      | -0.07 | 11.86 | -0.49 | 0.62307 |
| RPL7AP50   | 0.07  | 6.88  | 0.49  | 0.62350 |
| RASGRF2    | 0.07  | 7.23  | 0.49  | 0.62352 |
| ZNF292     | 0.05  | 7.94  | 0.49  | 0.62353 |
| SAFB2      | 0.03  | 10.13 | 0.49  | 0.62404 |
| HMOX1      | 0.06  | 10.35 | 0.49  | 0.62405 |
| GRAMD2B    | -0.05 | 5.61  | -0.49 | 0.62411 |
| ADAMTS10   | -0.07 | 7.57  | -0.49 | 0.62419 |
| SEPTIN10   | -0.05 | 5.20  | -0.49 | 0.62424 |
| WBP2       | 0.06  | 12.27 | 0.49  | 0.62428 |
| GPR68      | 0.07  | 8.55  | 0.49  | 0.62434 |
| HLA-B      | 0.05  | 16.85 | 0.49  | 0.62436 |
| ADAM22     | -0.06 | 5.26  | -0.49 | 0.62439 |
| ARSD       | 0.05  | 8.63  | 0.49  | 0.62440 |
| H2BC8      | 0.07  | 6.42  | 0.49  | 0.62445 |
| RUSC2      | -0.06 | 7.15  | -0.49 | 0.62450 |
| CA4        | 0.11  | 8.02  | 0.49  | 0.62462 |
| KIFC3      | 0.06  | 7.77  | 0.49  | 0.62462 |
| ZNF185     | -0.07 | 9.58  | -0.49 | 0.62470 |
| LINC01480  | 0.07  | 5.50  | 0.49  | 0.62486 |
| STAT6      | -0.05 | 13.13 | -0.49 | 0.62491 |
| PCTP       | -0.05 | 8.55  | -0.49 | 0.62507 |
| LINC01270  | -0.11 | 7.54  | -0.49 | 0.62516 |
| SLCO3A1    | -0.05 | 10.72 | -0.49 | 0.62522 |
| TOMM20     | 0.03  | 9.45  | 0.49  | 0.62524 |
| PAX8-AS1   | -0.18 | 7.96  | -0.49 | 0.62531 |
| MUC12-AS1  | 0.06  | 4.97  | 0.49  | 0.62538 |
| AC012498.2 | -0.06 | 5.06  | -0.49 | 0.62547 |
| TRPM2      | 0.06  | 8.75  | 0.49  | 0.62550 |
| AC004552.1 | 0.15  | 7.13  | 0.49  | 0.62550 |
| SIDT2      | 0.06  | 10.67 | 0.49  | 0.62572 |
| COPS3      | 0.03  | 9.15  | 0.49  | 0.62579 |
| CYP2D8P    | 0.06  | 5.20  | 0.49  | 0.62598 |
| PHF5A      | 0.04  | 8.27  | 0.49  | 0.62632 |

|            |       |       |       |         |
|------------|-------|-------|-------|---------|
| SLC27A3    | -0.06 | 9.99  | -0.49 | 0.62663 |
| ZBED6CL    | 0.03  | 7.79  | 0.49  | 0.62666 |
| NEURL1B    | 0.06  | 5.09  | 0.49  | 0.62674 |
| PA2G4P2    | 0.04  | 5.07  | 0.49  | 0.62685 |
| NSMCE4A    | -0.03 | 8.06  | -0.49 | 0.62698 |
| UTP11      | 0.03  | 7.89  | 0.49  | 0.62701 |
| SEPTIN8    | 0.05  | 6.88  | 0.49  | 0.62726 |
| BICDL2     | -0.11 | 5.88  | -0.49 | 0.62730 |
| NUAK2      | -0.05 | 10.63 | -0.49 | 0.62766 |
| ZNF800     | -0.03 | 7.94  | -0.49 | 0.62771 |
| CEBPB-AS1  | 0.05  | 5.46  | 0.49  | 0.62771 |
| TTC9C      | 0.03  | 8.18  | 0.49  | 0.62771 |
| ACY3       | 0.06  | 5.32  | 0.49  | 0.62799 |
| YBEY       | -0.06 | 6.95  | -0.49 | 0.62817 |
| AKR1C3     | 0.08  | 7.45  | 0.49  | 0.62822 |
| LRRN1      | -0.09 | 5.29  | -0.49 | 0.62829 |
| ODC1       | 0.06  | 10.04 | 0.49  | 0.62849 |
| GPN1       | 0.04  | 8.16  | 0.49  | 0.62853 |
| PSMG1      | 0.05  | 6.79  | 0.49  | 0.62859 |
| ADARB1     | 0.04  | 8.71  | 0.49  | 0.62870 |
| SASH3      | 0.03  | 11.92 | 0.49  | 0.62890 |
| AP005329.3 | -0.05 | 5.55  | -0.49 | 0.62901 |
| ACVRL1     | -0.06 | 5.69  | -0.49 | 0.62906 |
| TDRP       | -0.07 | 5.33  | -0.49 | 0.62920 |
| SMAD3      | -0.03 | 9.71  | -0.49 | 0.62926 |
| ELMO3      | 0.06  | 7.13  | 0.49  | 0.62928 |
| TTC21A     | -0.09 | 6.92  | -0.49 | 0.62942 |
| AC135050.6 | -0.04 | 7.11  | -0.49 | 0.62950 |
| KLRD1      | -0.07 | 9.77  | -0.49 | 0.62955 |
| MSRA       | -0.05 | 8.48  | -0.48 | 0.62979 |
| AC090543.3 | 0.12  | 6.52  | 0.48  | 0.62992 |
| CYREN      | 0.03  | 8.55  | 0.48  | 0.63000 |
| NPIPA9     | 0.05  | 6.13  | 0.48  | 0.63002 |
| IER5       | -0.04 | 9.58  | -0.48 | 0.63004 |
| PRR13      | 0.05  | 10.77 | 0.48  | 0.63006 |
| DUSP5      | -0.07 | 7.86  | -0.48 | 0.63010 |
| ATP6V0A1   | -0.05 | 9.89  | -0.48 | 0.63011 |
| POTEE      | 0.08  | 7.62  | 0.48  | 0.63034 |
| MGA        | -0.04 | 8.07  | -0.48 | 0.63051 |
| KLHL21     | -0.05 | 10.69 | -0.48 | 0.63051 |
| XPA        | 0.04  | 7.10  | 0.48  | 0.63060 |
| AC018647.2 | -0.05 | 6.37  | -0.48 | 0.63070 |
| ZNF76      | 0.04  | 9.25  | 0.48  | 0.63073 |
| CUL9       | -0.04 | 9.60  | -0.48 | 0.63096 |
| TRAV4      | 0.06  | 6.57  | 0.48  | 0.63102 |
| AC020688.1 | 0.05  | 5.61  | 0.48  | 0.63119 |
| POLD4      | 0.04  | 7.70  | 0.48  | 0.63125 |
| LAMC3      | 0.08  | 5.15  | 0.48  | 0.63135 |
| STRBP      | 0.06  | 7.51  | 0.48  | 0.63151 |
| PPM1F      | -0.05 | 11.28 | -0.48 | 0.63151 |

|             |       |       |       |         |
|-------------|-------|-------|-------|---------|
| CCT7P1      | 0.05  | 5.09  | 0.48  | 0.63169 |
| NT5DC4      | -0.08 | 5.77  | -0.48 | 0.63177 |
| ZNF354B     | -0.04 | 6.08  | -0.48 | 0.63179 |
| MSRB1P1     | -0.06 | 5.93  | -0.48 | 0.63185 |
| AL162431.1  | 0.05  | 5.61  | 0.48  | 0.63190 |
| AC122688.1  | -0.06 | 5.09  | -0.48 | 0.63192 |
| TMEM150B    | 0.07  | 6.92  | 0.48  | 0.63205 |
| GOLT1B      | -0.04 | 6.87  | -0.48 | 0.63209 |
| AC093673.1  | 0.05  | 7.74  | 0.48  | 0.63210 |
| AZIN2       | 0.06  | 6.01  | 0.48  | 0.63214 |
| USP8        | 0.05  | 8.74  | 0.48  | 0.63234 |
| MYL12A      | -0.04 | 12.29 | -0.48 | 0.63240 |
| NUDCD1      | -0.04 | 6.12  | -0.48 | 0.63241 |
| PAQR7       | 0.05  | 7.68  | 0.48  | 0.63247 |
| ATG2A       | -0.06 | 10.69 | -0.48 | 0.63248 |
| TMED2-DT    | -0.05 | 5.16  | -0.48 | 0.63259 |
| CCDC183-AS1 | -0.05 | 5.34  | -0.48 | 0.63280 |
| STMP1       | 0.06  | 9.07  | 0.48  | 0.63293 |
| ADCK1       | 0.05  | 7.38  | 0.48  | 0.63302 |
| FBXO42      | -0.02 | 9.03  | -0.48 | 0.63306 |
| PFKM        | 0.03  | 7.48  | 0.48  | 0.63321 |
| ZFAT        | 0.04  | 7.78  | 0.48  | 0.63323 |
| DPAGT1      | 0.04  | 8.64  | 0.48  | 0.63326 |
| TAF12       | 0.03  | 8.58  | 0.48  | 0.63330 |
| CEACAM4     | -0.09 | 9.57  | -0.48 | 0.63334 |
| NATD1       | -0.09 | 10.27 | -0.48 | 0.63336 |
| SPAG5       | -0.03 | 6.20  | -0.48 | 0.63339 |
| LINC01359   | -0.06 | 5.72  | -0.48 | 0.63343 |
| CORO6       | -0.06 | 5.66  | -0.48 | 0.63364 |
| C8G         | 0.06  | 5.12  | 0.48  | 0.63370 |
| PCSK6       | 0.10  | 7.23  | 0.48  | 0.63373 |
| AC107027.3  | -0.06 | 4.96  | -0.48 | 0.63375 |
| SPN         | 0.05  | 11.90 | 0.48  | 0.63399 |
| OR2W3       | 0.13  | 8.18  | 0.48  | 0.63408 |
| AC007342.7  | -0.06 | 5.15  | -0.48 | 0.63416 |
| CHIT1       | -0.12 | 6.14  | -0.48 | 0.63418 |
| HDGFP1      | -0.06 | 5.23  | -0.48 | 0.63424 |
| FASTKD2     | -0.03 | 7.90  | -0.48 | 0.63431 |
| TRAPPC3L    | -0.06 | 5.25  | -0.48 | 0.63435 |
| ARHGAP24    | -0.07 | 7.27  | -0.48 | 0.63455 |
| WBP2NL      | 0.05  | 5.13  | 0.48  | 0.63455 |
| RPL7AP11    | 0.06  | 6.16  | 0.48  | 0.63487 |
| ANP32AP1    | -0.06 | 5.77  | -0.48 | 0.63496 |
| ARAP3       | -0.06 | 10.72 | -0.48 | 0.63497 |
| IGKV4-1     | 0.09  | 9.31  | 0.48  | 0.63510 |
| SNRPEP4     | -0.05 | 5.13  | -0.48 | 0.63517 |
| LTB4R       | -0.06 | 10.13 | -0.48 | 0.63539 |
| SEC14L5     | -0.09 | 6.16  | -0.48 | 0.63545 |
| SIPA1L3     | 0.05  | 8.96  | 0.48  | 0.63576 |
| TREML3P     | 0.11  | 6.43  | 0.48  | 0.63590 |

|            |       |       |       |         |
|------------|-------|-------|-------|---------|
| NPAS2      | 0.07  | 5.26  | 0.48  | 0.63593 |
| CALM1P1    | -0.06 | 5.93  | -0.48 | 0.63597 |
| ZW10       | -0.03 | 6.80  | -0.48 | 0.63609 |
| TRMT10B    | 0.04  | 7.22  | 0.48  | 0.63621 |
| COG1       | 0.03  | 9.18  | 0.48  | 0.63627 |
| NXPE3      | 0.04  | 8.66  | 0.48  | 0.63632 |
| NOM1       | -0.04 | 7.57  | -0.48 | 0.63658 |
| SLX4       | -0.03 | 7.97  | -0.48 | 0.63666 |
| SNHG1      | -0.04 | 8.67  | -0.48 | 0.63671 |
| AC092670.1 | 0.04  | 5.36  | 0.48  | 0.63675 |
| AC245407.2 | 0.08  | 6.62  | 0.47  | 0.63688 |
| CBFA2T3    | 0.04  | 9.81  | 0.47  | 0.63691 |
| MTRNR2L10  | 0.05  | 5.23  | 0.47  | 0.63704 |
| ACIN1      | -0.03 | 11.55 | -0.47 | 0.63711 |
| MED21      | 0.04  | 6.60  | 0.47  | 0.63722 |
| IGKV3D-20  | 0.09  | 6.75  | 0.47  | 0.63743 |
| GRK6P1     | 0.07  | 6.95  | 0.47  | 0.63758 |
| CHST13     | -0.07 | 7.09  | -0.47 | 0.63760 |
| MTRF1      | -0.05 | 6.52  | -0.47 | 0.63761 |
| HLA-G      | 0.12  | 10.87 | 0.47  | 0.63772 |
| PSMC2      | 0.03  | 9.02  | 0.47  | 0.63785 |
| VIL1       | -0.07 | 5.92  | -0.47 | 0.63793 |
| YBX3P1     | 0.11  | 7.36  | 0.47  | 0.63800 |
| UTP23      | 0.04  | 7.19  | 0.47  | 0.63811 |
| GTF2IP12   | -0.07 | 7.02  | -0.47 | 0.63824 |
| CCDC154    | -0.06 | 5.72  | -0.47 | 0.63832 |
| PRPSAP2    | -0.03 | 8.34  | -0.47 | 0.63840 |
| PUM3       | 0.03  | 7.82  | 0.47  | 0.63847 |
| NDRG3      | 0.03  | 9.07  | 0.47  | 0.63860 |
| TTLL11     | 0.04  | 5.88  | 0.47  | 0.63877 |
| DDX12P     | -0.06 | 5.78  | -0.47 | 0.63882 |
| ZNF134     | -0.03 | 7.98  | -0.47 | 0.63891 |
| RFC2       | 0.04  | 8.46  | 0.47  | 0.63902 |
| HSF2       | 0.05  | 6.67  | 0.47  | 0.63932 |
| BTBD8      | 0.05  | 5.06  | 0.47  | 0.63944 |
| POLR2K     | -0.04 | 7.47  | -0.47 | 0.63968 |
| CRYBB2P1   | -0.06 | 7.14  | -0.47 | 0.63983 |
| SNRPGP10   | 0.05  | 5.35  | 0.47  | 0.64011 |
| HSD3B7     | 0.06  | 5.91  | 0.47  | 0.64019 |
| ZSWIM8     | -0.05 | 10.81 | -0.47 | 0.64025 |
| AC138028.6 | 0.05  | 5.12  | 0.47  | 0.64042 |
| ZNF786     | 0.04  | 7.33  | 0.47  | 0.64048 |
| TRGV5      | -0.09 | 5.18  | -0.47 | 0.64054 |
| AC079174.2 | -0.06 | 5.51  | -0.47 | 0.64055 |
| MGST3      | 0.05  | 8.59  | 0.47  | 0.64055 |
| NANP       | -0.04 | 5.40  | -0.47 | 0.64062 |
| SUPT6H     | 0.02  | 11.34 | 0.47  | 0.64063 |
| CDK5RAP1   | 0.03  | 8.37  | 0.47  | 0.64069 |
| SPRYD7     | -0.04 | 5.46  | -0.47 | 0.64086 |
| EXT2       | -0.02 | 8.98  | -0.47 | 0.64114 |

|            |       |       |       |         |
|------------|-------|-------|-------|---------|
| WASH9P     | -0.07 | 6.81  | -0.47 | 0.64115 |
| UBB        | 0.10  | 14.50 | 0.47  | 0.64123 |
| YY1AP1     | -0.04 | 10.43 | -0.47 | 0.64128 |
| AAMDC      | 0.06  | 6.26  | 0.47  | 0.64152 |
| IKBKGP1    | 0.05  | 5.69  | 0.47  | 0.64165 |
| GALNT2     | 0.03  | 9.82  | 0.47  | 0.64173 |
| CARNMT1    | -0.05 | 5.93  | -0.47 | 0.64192 |
| INO80      | -0.03 | 9.26  | -0.47 | 0.64220 |
| FCHSD1     | 0.04  | 9.91  | 0.47  | 0.64221 |
| ALKBH6     | -0.05 | 5.74  | -0.47 | 0.64227 |
| PPIAP22    | 0.06  | 9.31  | 0.47  | 0.64259 |
| MFSD8      | -0.05 | 6.87  | -0.47 | 0.64261 |
| CELA1      | 0.06  | 5.01  | 0.47  | 0.64262 |
| AC133644.3 | 0.04  | 5.04  | 0.47  | 0.64295 |
| THEM4      | 0.05  | 8.68  | 0.47  | 0.64301 |
| LAT        | 0.08  | 6.59  | 0.47  | 0.64315 |
| EEF1A1P22  | -0.04 | 7.55  | -0.47 | 0.64319 |
| AL353708.3 | -0.06 | 5.08  | -0.47 | 0.64319 |
| CARS2      | -0.04 | 10.75 | -0.47 | 0.64326 |
| FUT10      | -0.06 | 5.63  | -0.47 | 0.64339 |
| NKIRAS1    | 0.05  | 5.44  | 0.47  | 0.64362 |
| JUNB       | 0.07  | 11.01 | 0.46  | 0.64402 |
| RBL1       | -0.05 | 6.89  | -0.46 | 0.64417 |
| HPF1       | 0.04  | 7.00  | 0.46  | 0.64432 |
| ZNF552     | 0.06  | 7.25  | 0.46  | 0.64442 |
| UAP1       | -0.04 | 7.08  | -0.46 | 0.64451 |
| LMAN2L     | 0.03  | 7.84  | 0.46  | 0.64467 |
| PTPDC1     | -0.06 | 5.26  | -0.46 | 0.64468 |
| LEAP2      | -0.05 | 5.21  | -0.46 | 0.64474 |
| NOLC1      | -0.03 | 9.61  | -0.46 | 0.64476 |
| C17orf75   | 0.04  | 6.86  | 0.46  | 0.64482 |
| UBE2L6     | -0.08 | 11.53 | -0.46 | 0.64484 |
| IGHV3-49   | 0.08  | 6.24  | 0.46  | 0.64491 |
| PRDM15     | -0.05 | 7.57  | -0.46 | 0.64493 |
| AC008875.3 | 0.03  | 9.44  | 0.46  | 0.64496 |
| RAB11A     | -0.03 | 9.49  | -0.46 | 0.64499 |
| DERA       | -0.04 | 7.59  | -0.46 | 0.64507 |
| AL139384.1 | 0.05  | 6.35  | 0.46  | 0.64529 |
| C6orf163   | 0.05  | 5.03  | 0.46  | 0.64532 |
| PRR13P5    | -0.06 | 7.74  | -0.46 | 0.64535 |
| AC073073.1 | -0.06 | 5.65  | -0.46 | 0.64566 |
| APOL1      | -0.07 | 10.11 | -0.46 | 0.64585 |
| CRYZL1     | 0.05  | 7.16  | 0.46  | 0.64596 |
| GPRC5C     | -0.08 | 5.15  | -0.46 | 0.64603 |
| ELOC       | 0.03  | 7.95  | 0.46  | 0.64613 |
| KCTD11     | 0.03  | 7.97  | 0.46  | 0.64619 |
| ZFYVE1     | -0.03 | 9.26  | -0.46 | 0.64622 |
| WNT11      | -0.05 | 5.03  | -0.46 | 0.64625 |
| DLST       | -0.02 | 9.89  | -0.46 | 0.64628 |
| AP000766.1 | 0.04  | 5.11  | 0.46  | 0.64629 |

|            |       |       |       |         |
|------------|-------|-------|-------|---------|
| TRNP1      | -0.05 | 5.01  | -0.46 | 0.64633 |
| LINC00426  | 0.04  | 7.14  | 0.46  | 0.64634 |
| AP001160.3 | 0.05  | 5.00  | 0.46  | 0.64646 |
| NSUN5P2    | 0.08  | 8.53  | 0.46  | 0.64653 |
| SMU1       | 0.02  | 8.96  | 0.46  | 0.64674 |
| AC025171.2 | 0.04  | 6.67  | 0.46  | 0.64692 |
| PAK1IP1    | -0.03 | 6.67  | -0.46 | 0.64715 |
| NR1H3      | -0.05 | 7.07  | -0.46 | 0.64718 |
| KIR2DL3    | -0.08 | 6.36  | -0.46 | 0.64720 |
| ACTR8      | 0.03  | 7.63  | 0.46  | 0.64735 |
| HMG1       | 0.03  | 10.11 | 0.46  | 0.64739 |
| DUSP7      | 0.03  | 9.30  | 0.46  | 0.64751 |
| SMARCD3    | 0.05  | 9.61  | 0.46  | 0.64775 |
| CD27-AS1   | 0.04  | 6.92  | 0.46  | 0.64781 |
| PLA2G15    | 0.05  | 8.57  | 0.46  | 0.64795 |
| SERPINI1   | -0.05 | 5.61  | -0.46 | 0.64813 |
| PRDX4      | 0.06  | 7.38  | 0.46  | 0.64825 |
| DOC2GP     | -0.07 | 5.63  | -0.46 | 0.64829 |
| METTL9     | -0.04 | 10.17 | -0.46 | 0.64882 |
| AC139530.1 | -0.05 | 6.04  | -0.46 | 0.64898 |
| CHPT1      | -0.08 | 8.78  | -0.46 | 0.64902 |
| POLRMTP1   | 0.06  | 6.11  | 0.46  | 0.64904 |
| IGHV4-59   | 0.10  | 7.57  | 0.46  | 0.64905 |
| SDR42E1    | -0.05 | 5.80  | -0.46 | 0.64929 |
| POTEJ      | 0.05  | 6.31  | 0.46  | 0.64931 |
| MMP11      | 0.06  | 5.79  | 0.46  | 0.64933 |
| CLCN2      | 0.05  | 6.04  | 0.46  | 0.64944 |
| TMOD4      | -0.05 | 6.02  | -0.46 | 0.64950 |
| TRIM38     | -0.04 | 10.67 | -0.46 | 0.64962 |
| SIGLEC10   | 0.06  | 11.11 | 0.46  | 0.64966 |
| ZNF529     | 0.04  | 6.35  | 0.46  | 0.64979 |
| LGALS9C    | 0.09  | 6.56  | 0.46  | 0.64986 |
| CCNH       | -0.03 | 7.61  | -0.46 | 0.64997 |
| AC025181.1 | 0.05  | 5.11  | 0.46  | 0.65023 |
| SULT1A2    | -0.08 | 6.20  | -0.46 | 0.65031 |
| RPS15AP11  | 0.05  | 5.42  | 0.46  | 0.65046 |
| AC093627.4 | -0.05 | 6.51  | -0.46 | 0.65049 |
| GPR108     | 0.04  | 10.76 | 0.46  | 0.65060 |
| AC012313.1 | -0.04 | 5.99  | -0.46 | 0.65074 |
| AL080243.2 | 0.05  | 6.99  | 0.46  | 0.65090 |
| CLEC10A    | 0.10  | 8.65  | 0.45  | 0.65105 |
| FAN1       | 0.06  | 7.80  | 0.45  | 0.65105 |
| IGHV1-18   | -0.10 | 7.77  | -0.45 | 0.65129 |
| SDC2       | -0.06 | 5.13  | -0.45 | 0.65135 |
| CERK       | 0.03  | 10.89 | 0.45  | 0.65143 |
| ECD        | -0.03 | 8.14  | -0.45 | 0.65144 |
| CENPV      | 0.05  | 6.45  | 0.45  | 0.65161 |
| ALG9       | 0.04  | 5.56  | 0.45  | 0.65166 |
| LINC00937  | -0.10 | 7.12  | -0.45 | 0.65202 |
| ZNRF1      | -0.05 | 7.11  | -0.45 | 0.65210 |

|            |       |       |       |         |
|------------|-------|-------|-------|---------|
| SPECC1L    | 0.03  | 8.87  | 0.45  | 0.65219 |
| AC010878.1 | -0.05 | 5.29  | -0.45 | 0.65220 |
| RFX1       | -0.03 | 9.52  | -0.45 | 0.65240 |
| TOR1A      | -0.03 | 8.88  | -0.45 | 0.65257 |
| UMPS       | 0.04  | 7.76  | 0.45  | 0.65277 |
| AC104809.2 | -0.11 | 7.60  | -0.45 | 0.65294 |
| PCCA       | -0.04 | 6.76  | -0.45 | 0.65296 |
| NR4A1      | -0.08 | 7.53  | -0.45 | 0.65296 |
| ITPR3      | -0.04 | 10.05 | -0.45 | 0.65304 |
| LMLN       | 0.05  | 5.45  | 0.45  | 0.65304 |
| RRAS       | 0.06  | 8.81  | 0.45  | 0.65310 |
| ATP6V1G1   | -0.03 | 10.27 | -0.45 | 0.65324 |
| RCSD1      | 0.03  | 11.58 | 0.45  | 0.65337 |
| KDM7A-DT   | 0.07  | 7.65  | 0.45  | 0.65345 |
| PAXIP1-AS1 | 0.04  | 6.47  | 0.45  | 0.65347 |
| RHOA       | -0.03 | 13.10 | -0.45 | 0.65359 |
| FUZ        | 0.04  | 8.21  | 0.45  | 0.65359 |
| LIMS1      | 0.04  | 9.65  | 0.45  | 0.65395 |
| HSPD1P1    | -0.05 | 5.78  | -0.45 | 0.65414 |
| MUS81      | -0.03 | 9.38  | -0.45 | 0.65414 |
| AP1AR      | -0.05 | 6.22  | -0.45 | 0.65417 |
| MXI1       | 0.08  | 9.83  | 0.45  | 0.65438 |
| CCDC134    | 0.05  | 5.76  | 0.45  | 0.65450 |
| CENPT      | 0.05  | 9.56  | 0.45  | 0.65455 |
| AC118758.3 | -0.05 | 5.19  | -0.45 | 0.65458 |
| C1orf21    | -0.07 | 7.83  | -0.45 | 0.65466 |
| CCDC18-AS1 | 0.08  | 7.44  | 0.45  | 0.65467 |
| AC067930.3 | -0.11 | 5.09  | -0.45 | 0.65473 |
| AC012645.1 | -0.08 | 7.40  | -0.45 | 0.65476 |
| INPP5D     | -0.03 | 12.53 | -0.45 | 0.65482 |
| CCR12P     | 0.09  | 6.26  | 0.45  | 0.65483 |
| TTC28-AS1  | -0.04 | 7.27  | -0.45 | 0.65496 |
| ZNF227     | -0.03 | 7.61  | -0.45 | 0.65509 |
| SERF1B     | -0.04 | 5.05  | -0.45 | 0.65510 |
| RFESD      | -0.05 | 5.27  | -0.45 | 0.65511 |
| AL683807.1 | -0.08 | 5.64  | -0.45 | 0.65526 |
| PPP1R16A   | 0.04  | 7.00  | 0.45  | 0.65538 |
| TGFBR3     | -0.06 | 8.25  | -0.45 | 0.65558 |
| RMND1      | 0.04  | 6.96  | 0.45  | 0.65558 |
| ZC3HAV1    | -0.04 | 10.52 | -0.45 | 0.65561 |
| NEU1       | 0.04  | 9.71  | 0.45  | 0.65564 |
| AC008610.1 | 0.05  | 5.52  | 0.45  | 0.65583 |
| CYB5A      | -0.04 | 6.87  | -0.45 | 0.65603 |
| AC048341.1 | -0.05 | 5.59  | -0.45 | 0.65607 |
| CCNI2      | -0.05 | 5.42  | -0.45 | 0.65611 |
| SGTB       | -0.04 | 7.36  | -0.45 | 0.65614 |
| SKI        | -0.03 | 10.23 | -0.45 | 0.65621 |
| C17orf67   | 0.04  | 5.96  | 0.45  | 0.65627 |
| OSER1      | -0.04 | 9.69  | -0.45 | 0.65642 |
| EEF1A1P19  | 0.06  | 8.62  | 0.45  | 0.65648 |

|            |       |       |       |         |
|------------|-------|-------|-------|---------|
| CHIC1      | 0.05  | 6.19  | 0.45  | 0.65654 |
| HSF4       | 0.06  | 6.40  | 0.45  | 0.65655 |
| CEP164     | -0.03 | 9.20  | -0.45 | 0.65655 |
| ADAM15     | -0.05 | 10.19 | -0.45 | 0.65663 |
| LGALS8     | -0.04 | 9.63  | -0.45 | 0.65672 |
| PRICKLE3   | 0.03  | 7.93  | 0.45  | 0.65677 |
| RGS6       | 0.07  | 6.50  | 0.45  | 0.65685 |
| LMNTD2-AS1 | 0.07  | 5.92  | 0.45  | 0.65702 |
| ZBTB25     | -0.05 | 7.58  | -0.45 | 0.65721 |
| GNL2       | 0.03  | 8.73  | 0.45  | 0.65724 |
| RORC       | 0.07  | 7.04  | 0.45  | 0.65746 |
| ADAMTS13   | -0.06 | 5.28  | -0.45 | 0.65763 |
| AC011468.1 | 0.05  | 4.98  | 0.45  | 0.65785 |
| BOLA2B     | 0.04  | 5.10  | 0.45  | 0.65795 |
| SMIM24     | 0.09  | 6.79  | 0.45  | 0.65809 |
| CDCA3      | -0.05 | 5.14  | -0.44 | 0.65844 |
| TSPAN3     | -0.05 | 8.61  | -0.44 | 0.65853 |
| AC111182.1 | 0.05  | 5.22  | 0.44  | 0.65855 |
| TRIM16L    | -0.05 | 5.42  | -0.44 | 0.65864 |
| AC073465.1 | -0.06 | 5.19  | -0.44 | 0.65868 |
| VDAC1P1    | -0.05 | 5.22  | -0.44 | 0.65875 |
| MBLAC2     | -0.04 | 5.59  | -0.44 | 0.65884 |
| ASGR1      | 0.07  | 8.27  | 0.44  | 0.65893 |
| ZNF56      | 0.05  | 5.23  | 0.44  | 0.65897 |
| ZNF710-AS1 | 0.04  | 7.05  | 0.44  | 0.65901 |
| BRI3P1     | -0.04 | 5.27  | -0.44 | 0.65919 |
| PRKD2      | 0.04  | 12.15 | 0.44  | 0.65923 |
| ENOSF1     | -0.06 | 7.55  | -0.44 | 0.65938 |
| UBE2R2     | -0.04 | 10.95 | -0.44 | 0.65941 |
| SETBP1     | 0.05  | 6.60  | 0.44  | 0.65976 |
| MGAT5      | -0.03 | 9.81  | -0.44 | 0.65979 |
| ZNF398     | 0.03  | 8.22  | 0.44  | 0.65993 |
| AC245140.2 | -0.06 | 5.26  | -0.44 | 0.65999 |
| PHETA1     | 0.05  | 7.34  | 0.44  | 0.66003 |
| MRPL15     | 0.04  | 7.44  | 0.44  | 0.66007 |
| POP1       | 0.04  | 6.55  | 0.44  | 0.66037 |
| HIKESHI    | 0.03  | 7.89  | 0.44  | 0.66038 |
| MYL12B     | -0.04 | 11.40 | -0.44 | 0.66044 |
| LINC01679  | 0.06  | 5.16  | 0.44  | 0.66055 |
| EFCAB11    | -0.05 | 5.15  | -0.44 | 0.66056 |
| PRAMENP    | 0.06  | 5.21  | 0.44  | 0.66064 |
| HLA-DRA    | -0.05 | 13.83 | -0.44 | 0.66077 |
| NKAPD1     | -0.03 | 7.74  | -0.44 | 0.66077 |
| GPAM       | -0.04 | 5.87  | -0.44 | 0.66087 |
| FCGRT      | 0.05  | 12.55 | 0.44  | 0.66103 |
| LRRC8A     | 0.04  | 9.03  | 0.44  | 0.66108 |
| CAMK1D     | 0.04  | 10.54 | 0.44  | 0.66110 |
| ARMH3      | -0.03 | 8.49  | -0.44 | 0.66134 |
| LRRC41     | 0.03  | 9.46  | 0.44  | 0.66158 |
| P2RY10     | -0.05 | 8.49  | -0.44 | 0.66160 |



|              |       |       |       |         |
|--------------|-------|-------|-------|---------|
| SDHB         | -0.03 | 9.55  | -0.44 | 0.66160 |
| POLA1        | -0.04 | 6.55  | -0.44 | 0.66189 |
| TTC25        | 0.06  | 5.45  | 0.44  | 0.66201 |
| ITPKB        | -0.03 | 10.75 | -0.44 | 0.66227 |
| RPL12P8      | 0.05  | 5.51  | 0.44  | 0.66231 |
| AC084880.1   | 0.05  | 5.86  | 0.44  | 0.66264 |
| STX16-NPEPL1 | -0.07 | 6.62  | -0.44 | 0.66269 |
| DCTD         | 0.03  | 9.19  | 0.44  | 0.66270 |
| ZNF683       | -0.15 | 8.18  | -0.44 | 0.66273 |
| MSS51        | -0.05 | 5.69  | -0.44 | 0.66284 |
| PHLDB1       | -0.05 | 4.96  | -0.44 | 0.66310 |
| CCNG1        | -0.04 | 8.40  | -0.44 | 0.66329 |
| IFT46        | 0.03  | 6.93  | 0.44  | 0.66336 |
| HOXB2        | 0.07  | 6.66  | 0.44  | 0.66343 |
| LINC01619    | -0.06 | 5.58  | -0.44 | 0.66346 |
| CMC2         | -0.05 | 7.11  | -0.44 | 0.66376 |
| FAM228B      | 0.05  | 6.33  | 0.44  | 0.66382 |
| ACTBP8       | 0.12  | 6.70  | 0.44  | 0.66391 |
| SAMHD1       | -0.04 | 12.66 | -0.44 | 0.66394 |
| ZNF264       | 0.03  | 8.46  | 0.44  | 0.66407 |
| NFYC         | 0.03  | 10.29 | 0.44  | 0.66419 |
| ZYG11B       | -0.04 | 7.16  | -0.44 | 0.66427 |
| H2BC15       | -0.06 | 5.22  | -0.44 | 0.66457 |
| DOCK8-AS1    | -0.04 | 5.54  | -0.44 | 0.66461 |
| FTH1P8       | 0.07  | 8.70  | 0.44  | 0.66468 |
| MS4A2        | -0.07 | 5.92  | -0.44 | 0.66492 |
| SDF2         | -0.03 | 9.29  | -0.44 | 0.66503 |
| USB1         | -0.05 | 10.77 | -0.44 | 0.66509 |
| ACTR6        | -0.04 | 6.62  | -0.44 | 0.66512 |
| RFPL2        | 0.06  | 5.05  | 0.43  | 0.66540 |
| TSPAN9       | 0.07  | 7.29  | 0.43  | 0.66544 |
| NRXN2        | -0.06 | 5.13  | -0.43 | 0.66545 |
| DET1         | 0.05  | 5.07  | 0.43  | 0.66556 |
| TAGLN2P1     | -0.07 | 8.12  | -0.43 | 0.66557 |
| DHTKD1       | 0.04  | 8.74  | 0.43  | 0.66562 |
| MPPE1        | -0.04 | 9.96  | -0.43 | 0.66568 |
| POTEF        | 0.08  | 7.78  | 0.43  | 0.66581 |
| ACTR5        | 0.04  | 7.74  | 0.43  | 0.66596 |
| COPS8        | 0.03  | 7.77  | 0.43  | 0.66600 |
| SLC30A4      | -0.06 | 5.43  | -0.43 | 0.66614 |
| REST         | 0.04  | 8.31  | 0.43  | 0.66622 |
| GLB1L2       | -0.09 | 6.11  | -0.43 | 0.66627 |
| ZCCHC14      | -0.04 | 7.66  | -0.43 | 0.66658 |
| SYNM         | 0.07  | 6.44  | 0.43  | 0.66659 |
| ABCF2P1      | -0.05 | 5.12  | -0.43 | 0.66659 |
| SYTL3        | -0.05 | 9.79  | -0.43 | 0.66667 |
| C2CD2L       | 0.04  | 9.64  | 0.43  | 0.66673 |
| DECR2        | 0.05  | 5.98  | 0.43  | 0.66685 |
| PPCDC        | -0.05 | 9.32  | -0.43 | 0.66694 |
| PPP1R3E      | 0.06  | 8.04  | 0.43  | 0.66695 |

|            |       |       |       |         |
|------------|-------|-------|-------|---------|
| GEMIN2     | -0.04 | 6.16  | -0.43 | 0.66697 |
| AGL        | -0.04 | 6.68  | -0.43 | 0.66698 |
| RPS26P11   | 0.09  | 5.85  | 0.43  | 0.66719 |
| AC093627.5 | 0.04  | 5.68  | 0.43  | 0.66735 |
| GADD45A    | -0.07 | 7.17  | -0.43 | 0.66757 |
| CYP4F22    | 0.06  | 6.65  | 0.43  | 0.66769 |
| EVA1B      | 0.05  | 6.69  | 0.43  | 0.66789 |
| TNFRSF1B   | 0.04  | 13.89 | 0.43  | 0.66789 |
| RPS26P47   | 0.09  | 6.05  | 0.43  | 0.66811 |
| C19orf38   | 0.05  | 10.53 | 0.43  | 0.66816 |
| STARD7     | 0.03  | 10.21 | 0.43  | 0.66819 |
| LINC00957  | 0.04  | 7.27  | 0.43  | 0.66819 |
| ADHFE1     | -0.05 | 5.92  | -0.43 | 0.66822 |
| ZNF513     | 0.04  | 7.94  | 0.43  | 0.66825 |
| PPME1      | 0.03  | 8.42  | 0.43  | 0.66845 |
| TACSTD2    | -0.08 | 5.24  | -0.43 | 0.66859 |
| ABCB4      | 0.06  | 5.65  | 0.43  | 0.66864 |
| ALPL       | -0.11 | 12.29 | -0.43 | 0.66867 |
| AC011933.1 | 0.05  | 5.15  | 0.43  | 0.66875 |
| CNIH1      | -0.04 | 7.90  | -0.43 | 0.66876 |
| RAD51B     | -0.04 | 5.65  | -0.43 | 0.66880 |
| UBE2Q1     | 0.02  | 10.48 | 0.43  | 0.66880 |
| PADI6      | 0.08  | 4.92  | 0.43  | 0.66883 |
| SRSF3      | -0.02 | 11.06 | -0.43 | 0.66894 |
| LINC02656  | -0.06 | 5.14  | -0.43 | 0.66894 |
| RTCA       | -0.03 | 7.60  | -0.43 | 0.66898 |
| ITIH1      | 0.05  | 5.01  | 0.43  | 0.66902 |
| NRAV       | -0.04 | 5.64  | -0.43 | 0.66918 |
| LIM2       | 0.05  | 4.99  | 0.43  | 0.66922 |
| AC025262.2 | 0.06  | 5.20  | 0.43  | 0.66923 |
| SRR        | 0.05  | 5.74  | 0.43  | 0.66933 |
| GSN        | -0.05 | 11.38 | -0.43 | 0.66936 |
| YPEL1      | -0.04 | 8.20  | -0.43 | 0.66937 |
| HENMT1     | 0.04  | 8.28  | 0.43  | 0.66940 |
| SNCA       | 0.11  | 9.77  | 0.43  | 0.66944 |
| EIF3LP3    | 0.05  | 5.98  | 0.43  | 0.66954 |
| TXNL4B     | -0.03 | 8.09  | -0.43 | 0.66955 |
| CCNL2      | -0.05 | 10.81 | -0.43 | 0.66956 |
| COX14      | 0.05  | 8.41  | 0.43  | 0.66959 |
| AC011374.2 | -0.05 | 5.14  | -0.43 | 0.66966 |
| AC135983.3 | -0.06 | 5.68  | -0.43 | 0.66974 |
| AC025682.2 | -0.06 | 5.63  | -0.43 | 0.66977 |
| ZNF195     | -0.04 | 6.96  | -0.43 | 0.66990 |
| ABCE1      | -0.04 | 7.69  | -0.43 | 0.66996 |
| CCDC153    | -0.06 | 6.54  | -0.43 | 0.67016 |
| CROT       | 0.04  | 6.52  | 0.43  | 0.67055 |
| TMEM63A    | 0.03  | 10.71 | 0.43  | 0.67063 |
| LINC00987  | -0.05 | 5.14  | -0.43 | 0.67091 |
| AC123595.1 | 0.06  | 5.25  | 0.43  | 0.67097 |
| ARIH2OS    | 0.04  | 5.70  | 0.43  | 0.67104 |

|            |       |       |       |         |
|------------|-------|-------|-------|---------|
| TRBV12-4   | 0.07  | 6.64  | 0.43  | 0.67105 |
| DCAF6      | -0.04 | 8.66  | -0.43 | 0.67119 |
| EME2       | 0.05  | 7.75  | 0.43  | 0.67129 |
| UBAP2      | -0.03 | 8.68  | -0.43 | 0.67135 |
| DPF3       | 0.05  | 5.22  | 0.43  | 0.67139 |
| PSMD8P1    | -0.05 | 5.36  | -0.43 | 0.67141 |
| TPD52L2    | -0.03 | 11.20 | -0.43 | 0.67152 |
| S100A10    | 0.05  | 11.15 | 0.43  | 0.67218 |
| AC005306.1 | -0.06 | 8.50  | -0.43 | 0.67220 |
| MIR3945HG  | -0.09 | 6.55  | -0.43 | 0.67223 |
| PALB2      | -0.05 | 6.74  | -0.43 | 0.67223 |
| SART3      | -0.03 | 9.75  | -0.43 | 0.67227 |
| MIR600HG   | 0.06  | 6.77  | 0.43  | 0.67228 |
| FHL1       | 0.05  | 7.88  | 0.43  | 0.67228 |
| PSMD11     | -0.02 | 9.09  | -0.43 | 0.67230 |
| PABPC1P4   | -0.06 | 8.13  | -0.43 | 0.67236 |
| ZNF831     | 0.04  | 8.62  | 0.43  | 0.67245 |
| AL353660.1 | -0.06 | 5.60  | -0.43 | 0.67247 |
| ARL8A      | 0.04  | 9.84  | 0.43  | 0.67256 |
| TMEM158    | 0.08  | 6.55  | 0.42  | 0.67281 |
| LRRC37A4P  | -0.07 | 6.94  | -0.42 | 0.67296 |
| FMNL1      | -0.04 | 13.93 | -0.42 | 0.67300 |
| TRIM65     | 0.03  | 8.52  | 0.42  | 0.67317 |
| LINC02018  | 0.05  | 5.07  | 0.42  | 0.67322 |
| HAUS5      | 0.04  | 7.71  | 0.42  | 0.67325 |
| VAV1       | -0.03 | 11.42 | -0.42 | 0.67353 |
| NEURL1     | 0.08  | 7.25  | 0.42  | 0.67360 |
| GMFG       | 0.05  | 12.57 | 0.42  | 0.67366 |
| SLC44A2    | -0.04 | 12.93 | -0.42 | 0.67398 |
| SEL1L3     | -0.04 | 9.41  | -0.42 | 0.67430 |
| CDC42EP4   | -0.04 | 7.28  | -0.42 | 0.67441 |
| TOMM70     | -0.03 | 8.03  | -0.42 | 0.67443 |
| NDUFV2-AS1 | 0.04  | 5.69  | 0.42  | 0.67469 |
| WDR90      | -0.05 | 6.43  | -0.42 | 0.67472 |
| PPP1R12A   | 0.06  | 9.80  | 0.42  | 0.67476 |
| PMEPA1     | 0.06  | 6.57  | 0.42  | 0.67534 |
| MAGOH2P    | 0.05  | 5.26  | 0.42  | 0.67537 |
| TIAM1      | -0.05 | 8.69  | -0.42 | 0.67539 |
| SLIRP      | 0.04  | 7.60  | 0.42  | 0.67539 |
| TAF9B      | -0.04 | 6.37  | -0.42 | 0.67564 |
| KCNQ1      | 0.03  | 9.72  | 0.42  | 0.67566 |
| RHOBTB3    | -0.06 | 5.31  | -0.42 | 0.67569 |
| AL160191.2 | 0.06  | 5.39  | 0.42  | 0.67588 |
| SRSF4      | 0.03  | 10.35 | 0.42  | 0.67589 |
| KANK2      | 0.10  | 6.39  | 0.42  | 0.67591 |
| TGDS       | 0.05  | 6.11  | 0.42  | 0.67598 |
| RCL1       | 0.03  | 6.76  | 0.42  | 0.67629 |
| IGKV1-39   | -0.08 | 6.55  | -0.42 | 0.67638 |
| TRAV12-1   | -0.06 | 6.38  | -0.42 | 0.67680 |
| YWHAH      | -0.03 | 10.10 | -0.42 | 0.67691 |

|            |       |       |       |         |
|------------|-------|-------|-------|---------|
| WWP2       | -0.03 | 11.40 | -0.42 | 0.67693 |
| CHKB       | 0.05  | 6.05  | 0.42  | 0.67705 |
| PAFAH2     | -0.03 | 8.68  | -0.42 | 0.67716 |
| AKR1C1     | 0.06  | 5.04  | 0.42  | 0.67767 |
| VPS52      | -0.03 | 9.38  | -0.42 | 0.67774 |
| RPL7L1     | 0.03  | 9.39  | 0.42  | 0.67785 |
| SNAPC3     | -0.04 | 7.03  | -0.42 | 0.67788 |
| EIF3CL     | 0.06  | 7.79  | 0.42  | 0.67804 |
| AP000763.3 | 0.06  | 5.90  | 0.42  | 0.67833 |
| CES1       | -0.10 | 8.31  | -0.42 | 0.67844 |
| CELSR1     | 0.06  | 6.21  | 0.42  | 0.67847 |
| ABHD11     | 0.04  | 7.86  | 0.42  | 0.67853 |
| SVIL-AS1   | -0.04 | 6.77  | -0.42 | 0.67863 |
| POLR3B     | -0.04 | 6.67  | -0.42 | 0.67866 |
| PSMC1      | 0.03  | 9.04  | 0.42  | 0.67867 |
| ARMC2      | -0.04 | 5.46  | -0.42 | 0.67872 |
| DCAF16     | -0.03 | 7.47  | -0.42 | 0.67927 |
| AC023512.1 | 0.05  | 5.72  | 0.42  | 0.67929 |
| PCNX3      | -0.03 | 10.35 | -0.42 | 0.67943 |
| PGRMC2     | -0.03 | 8.17  | -0.42 | 0.67945 |
| AC099494.2 | 0.05  | 5.08  | 0.42  | 0.67946 |
| STIP1P3    | 0.05  | 5.78  | 0.42  | 0.67947 |
| AC139795.1 | -0.06 | 5.49  | -0.42 | 0.67965 |
| PGRMC1     | -0.05 | 8.87  | -0.41 | 0.67992 |
| MLX        | -0.03 | 10.33 | -0.41 | 0.68012 |
| TSTD3      | 0.05  | 5.16  | 0.41  | 0.68051 |
| CCDC90B    | 0.03  | 7.49  | 0.41  | 0.68060 |
| LPXN       | 0.03  | 10.11 | 0.41  | 0.68060 |
| CTSH       | 0.05  | 11.06 | 0.41  | 0.68061 |
| LCN2       | 0.13  | 9.08  | 0.41  | 0.68073 |
| SLC33A1    | 0.04  | 6.79  | 0.41  | 0.68076 |
| YIPF6      | -0.03 | 7.43  | -0.41 | 0.68077 |
| NBPF15     | -0.07 | 7.48  | -0.41 | 0.68098 |
| RASL11A    | -0.08 | 6.26  | -0.41 | 0.68101 |
| AL391832.2 | -0.06 | 6.39  | -0.41 | 0.68107 |
| RSRC1      | -0.04 | 7.10  | -0.41 | 0.68110 |
| LINC00324  | 0.03  | 8.21  | 0.41  | 0.68110 |
| NAPB       | -0.03 | 6.79  | -0.41 | 0.68110 |
| KCNE1      | -0.08 | 6.80  | -0.41 | 0.68114 |
| RBM17      | -0.02 | 9.33  | -0.41 | 0.68124 |
| TMEM176B   | 0.17  | 9.58  | 0.41  | 0.68132 |
| C2CD4D-AS1 | -0.05 | 5.00  | -0.41 | 0.68133 |
| AL161421.1 | 0.05  | 5.00  | 0.41  | 0.68158 |
| PPP2R3C    | -0.04 | 8.77  | -0.41 | 0.68161 |
| NPM1P27    | 0.06  | 7.67  | 0.41  | 0.68166 |
| BAZ2B      | 0.05  | 9.01  | 0.41  | 0.68173 |
| IMPA2      | 0.05  | 10.05 | 0.41  | 0.68176 |
| LAG3       | 0.08  | 8.01  | 0.41  | 0.68190 |
| ORC5       | -0.03 | 7.09  | -0.41 | 0.68207 |
| AMER1      | -0.04 | 6.38  | -0.41 | 0.68215 |

|            |       |       |       |         |
|------------|-------|-------|-------|---------|
| HDAC7      | 0.03  | 11.55 | 0.41  | 0.68232 |
| ZNF829     | 0.04  | 5.56  | 0.41  | 0.68238 |
| AKIP1      | 0.04  | 6.56  | 0.41  | 0.68254 |
| NEK11      | -0.04 | 5.16  | -0.41 | 0.68262 |
| NDUFB6     | 0.05  | 8.03  | 0.41  | 0.68270 |
| TMED8      | -0.06 | 7.61  | -0.41 | 0.68293 |
| EIF4E      | -0.02 | 7.15  | -0.41 | 0.68311 |
| PILRB      | -0.08 | 7.17  | -0.41 | 0.68339 |
| GOS2       | -0.09 | 6.03  | -0.41 | 0.68361 |
| IRF1       | -0.05 | 13.06 | -0.41 | 0.68363 |
| CIT        | -0.05 | 5.23  | -0.41 | 0.68369 |
| DGKE       | -0.04 | 7.08  | -0.41 | 0.68375 |
| INTS7      | -0.03 | 7.20  | -0.41 | 0.68403 |
| POR        | 0.05  | 10.70 | 0.41  | 0.68405 |
| IGKV2D-28  | -0.08 | 5.88  | -0.41 | 0.68407 |
| MRPL50     | -0.03 | 6.99  | -0.41 | 0.68433 |
| GPR25      | 0.05  | 5.26  | 0.41  | 0.68462 |
| PLEKHA3    | 0.04  | 6.96  | 0.41  | 0.68468 |
| STRADB     | 0.11  | 9.70  | 0.41  | 0.68493 |
| LINC02693  | 0.04  | 6.40  | 0.41  | 0.68503 |
| B3GNT7     | -0.06 | 6.37  | -0.41 | 0.68512 |
| BTBD6P1    | -0.05 | 5.16  | -0.41 | 0.68515 |
| RAB30-DT   | 0.04  | 6.26  | 0.41  | 0.68526 |
| BRCC3      | 0.03  | 7.42  | 0.41  | 0.68539 |
| ZNF319     | -0.03 | 9.26  | -0.41 | 0.68542 |
| ADGRG1     | -0.07 | 11.69 | -0.41 | 0.68556 |
| TXLNA      | 0.02  | 9.78  | 0.41  | 0.68565 |
| AC245884.8 | 0.06  | 5.29  | 0.41  | 0.68568 |
| AL513318.1 | 0.05  | 5.33  | 0.41  | 0.68568 |
| HSPA7      | -0.07 | 8.46  | -0.41 | 0.68577 |
| FAM126B    | 0.07  | 9.22  | 0.41  | 0.68584 |
| AC018521.5 | 0.05  | 5.28  | 0.41  | 0.68590 |
| MYL6P1     | 0.04  | 5.56  | 0.41  | 0.68596 |
| TMEM184B   | 0.04  | 9.81  | 0.41  | 0.68602 |
| IFT88      | 0.04  | 6.15  | 0.41  | 0.68630 |
| TFAP2E     | -0.03 | 5.73  | -0.41 | 0.68640 |
| IGHV2-5    | 0.09  | 6.48  | 0.41  | 0.68652 |
| TRIM3      | 0.04  | 7.40  | 0.41  | 0.68668 |
| SHC1       | -0.02 | 9.72  | -0.41 | 0.68675 |
| MGRN1      | 0.04  | 10.93 | 0.41  | 0.68700 |
| IFNLR1     | -0.07 | 6.37  | -0.41 | 0.68712 |
| AC093726.2 | -0.05 | 5.21  | -0.40 | 0.68737 |
| SERPINB10  | -0.06 | 5.12  | -0.40 | 0.68745 |
| ATF7-NPFF  | -0.05 | 5.16  | -0.40 | 0.68751 |
| AC084824.6 | -0.04 | 5.04  | -0.40 | 0.68772 |
| AC020658.5 | -0.06 | 6.02  | -0.40 | 0.68774 |
| ITGAV      | -0.04 | 6.01  | -0.40 | 0.68787 |
| RASA4B     | -0.05 | 6.29  | -0.40 | 0.68793 |
| LRP10      | -0.05 | 13.36 | -0.40 | 0.68801 |
| PINK1      | 0.06  | 11.13 | 0.40  | 0.68809 |

|                |       |       |       |         |
|----------------|-------|-------|-------|---------|
| MIR4435-2HG    | 0.05  | 7.67  | 0.40  | 0.68815 |
| TMEM63B        | 0.06  | 8.84  | 0.40  | 0.68825 |
| YEATS2         | -0.02 | 8.88  | -0.40 | 0.68826 |
| CLEC1B         | 0.06  | 6.45  | 0.40  | 0.68826 |
| PDK1           | -0.05 | 7.45  | -0.40 | 0.68827 |
| SYVN1          | 0.03  | 10.26 | 0.40  | 0.68873 |
| TIE1           | 0.05  | 5.21  | 0.40  | 0.68874 |
| HCK            | -0.05 | 12.79 | -0.40 | 0.68888 |
| RTKL1-TNFRSF6B | -0.05 | 5.11  | -0.40 | 0.68891 |
| TROAP          | 0.04  | 5.19  | 0.40  | 0.68897 |
| NOCT           | 0.05  | 5.07  | 0.40  | 0.68903 |
| KMT5A          | 0.03  | 8.10  | 0.40  | 0.68906 |
| FANCD2         | -0.04 | 7.41  | -0.40 | 0.68934 |
| JAKMIP2        | -0.05 | 6.29  | -0.40 | 0.68935 |
| ZNF439         | 0.05  | 6.61  | 0.40  | 0.68940 |
| AP4B1          | -0.03 | 9.09  | -0.40 | 0.68945 |
| BRD3           | -0.03 | 9.68  | -0.40 | 0.68955 |
| GNGT2          | 0.05  | 7.17  | 0.40  | 0.68958 |
| DHX32          | 0.04  | 6.91  | 0.40  | 0.68979 |
| NCF1           | -0.07 | 12.88 | -0.40 | 0.68980 |
| TRAV35         | 0.04  | 5.47  | 0.40  | 0.68980 |
| IGKV1D-16      | 0.06  | 5.69  | 0.40  | 0.68985 |
| SMOX           | 0.08  | 9.34  | 0.40  | 0.68997 |
| SKAP2          | -0.06 | 9.73  | -0.40 | 0.69001 |
| CRYBG2         | -0.05 | 5.95  | -0.40 | 0.69008 |
| SOCS1          | -0.06 | 6.64  | -0.40 | 0.69012 |
| EIF4A1P4       | 0.04  | 6.04  | 0.40  | 0.69016 |
| RRP1B          | -0.04 | 8.67  | -0.40 | 0.69023 |
| PDLIM5         | 0.04  | 8.46  | 0.40  | 0.69038 |
| SPOCD1         | -0.07 | 6.70  | -0.40 | 0.69050 |
| AC005332.4     | 0.04  | 6.77  | 0.40  | 0.69081 |
| MACROD2        | 0.09  | 5.55  | 0.40  | 0.69087 |
| H2AC18         | -0.05 | 5.56  | -0.40 | 0.69098 |
| AL355001.2     | 0.04  | 5.06  | 0.40  | 0.69104 |
| HNRNPA1P48     | 0.06  | 8.06  | 0.40  | 0.69111 |
| RRAGC          | -0.03 | 7.89  | -0.40 | 0.69113 |
| MUC1           | 0.05  | 5.51  | 0.40  | 0.69114 |
| SLC26A11       | -0.05 | 8.13  | -0.40 | 0.69130 |
| CD28           | 0.05  | 8.66  | 0.40  | 0.69130 |
| DUSP8          | -0.05 | 6.21  | -0.40 | 0.69131 |
| MYEOV          | 0.06  | 5.58  | 0.40  | 0.69160 |
| XRCC4          | -0.03 | 6.52  | -0.40 | 0.69176 |
| STX16          | -0.04 | 10.13 | -0.40 | 0.69194 |
| KIF5B          | -0.03 | 9.22  | -0.40 | 0.69203 |
| PIK3C2B        | -0.05 | 8.03  | -0.40 | 0.69207 |
| SDHC           | -0.02 | 8.97  | -0.40 | 0.69211 |
| RAB29          | 0.03  | 9.44  | 0.40  | 0.69233 |
| RAB2A          | -0.03 | 9.20  | -0.40 | 0.69234 |
| TMEM242        | -0.03 | 6.95  | -0.40 | 0.69236 |
| LRFN4          | -0.06 | 6.22  | -0.40 | 0.69245 |

|             |       |       |       |         |
|-------------|-------|-------|-------|---------|
| THUMPD3-AS1 | 0.06  | 7.61  | 0.40  | 0.69254 |
| ZNF852      | 0.04  | 5.51  | 0.40  | 0.69263 |
| BBX         | 0.03  | 8.78  | 0.40  | 0.69271 |
| RCN2        | -0.04 | 7.11  | -0.40 | 0.69288 |
| COX15       | 0.03  | 8.39  | 0.40  | 0.69297 |
| IGIP        | -0.04 | 6.57  | -0.40 | 0.69301 |
| ATXN3       | 0.03  | 8.01  | 0.40  | 0.69310 |
| GATAD2A     | 0.02  | 10.91 | 0.40  | 0.69316 |
| FTH1P20     | -0.05 | 7.48  | -0.40 | 0.69354 |
| WDR62       | 0.04  | 5.88  | 0.40  | 0.69368 |
| UBE2O       | 0.05  | 9.88  | 0.40  | 0.69402 |
| GNL3        | -0.03 | 8.32  | -0.40 | 0.69406 |
| CLBA1       | 0.04  | 5.17  | 0.40  | 0.69409 |
| FBXO9       | 0.05  | 9.61  | 0.40  | 0.69415 |
| CEP95       | -0.04 | 8.05  | -0.40 | 0.69424 |
| RPL31P63    | 0.05  | 6.70  | 0.40  | 0.69425 |
| BAZ1A       | -0.06 | 10.32 | -0.40 | 0.69444 |
| TSC22D3     | -0.05 | 13.51 | -0.39 | 0.69453 |
| MIR1244-3   | 0.05  | 5.78  | 0.39  | 0.69463 |
| GRAMD1A     | -0.05 | 10.67 | -0.39 | 0.69463 |
| FTH1P12     | 0.03  | 5.81  | 0.39  | 0.69468 |
| MYL12AP1    | -0.05 | 6.05  | -0.39 | 0.69481 |
| ABL1        | -0.03 | 9.06  | -0.39 | 0.69483 |
| HSPD1       | -0.03 | 9.91  | -0.39 | 0.69486 |
| EDAR        | -0.06 | 5.71  | -0.39 | 0.69496 |
| AC020612.1  | 0.04  | 5.85  | 0.39  | 0.69496 |
| FZD3        | 0.04  | 5.55  | 0.39  | 0.69510 |
| SCNN1D      | 0.05  | 6.11  | 0.39  | 0.69511 |
| ALOX5AP     | -0.08 | 11.92 | -0.39 | 0.69513 |
| CYP27A1     | 0.07  | 9.97  | 0.39  | 0.69513 |
| RFTN1       | 0.03  | 9.95  | 0.39  | 0.69559 |
| SERPINB9P1  | -0.05 | 7.77  | -0.39 | 0.69563 |
| ADAL        | 0.04  | 5.87  | 0.39  | 0.69576 |
| NKD1        | 0.05  | 5.41  | 0.39  | 0.69584 |
| NUP50-DT    | 0.05  | 7.73  | 0.39  | 0.69590 |
| IGHV3-48    | 0.09  | 6.97  | 0.39  | 0.69592 |
| ZNF860      | -0.05 | 5.04  | -0.39 | 0.69604 |
| BRI3        | 0.05  | 11.57 | 0.39  | 0.69618 |
| NUDT5       | 0.04  | 9.59  | 0.39  | 0.69625 |
| TBC1D31     | -0.03 | 7.06  | -0.39 | 0.69632 |
| EEF1A1P6    | 0.06  | 11.36 | 0.39  | 0.69633 |
| ZNF816      | 0.04  | 6.11  | 0.39  | 0.69633 |
| BRD1        | -0.03 | 9.42  | -0.39 | 0.69633 |
| FAM216A     | -0.04 | 6.11  | -0.39 | 0.69640 |
| ANAPC10     | 0.03  | 5.19  | 0.39  | 0.69643 |
| UBFD1       | 0.02  | 8.29  | 0.39  | 0.69644 |
| KRR1        | 0.04  | 7.61  | 0.39  | 0.69663 |
| CD8B        | 0.08  | 9.77  | 0.39  | 0.69677 |
| MIDN        | 0.05  | 11.16 | 0.39  | 0.69681 |
| CUL1        | -0.03 | 9.82  | -0.39 | 0.69686 |

|            |       |       |       |         |
|------------|-------|-------|-------|---------|
| COQ6       | -0.03 | 7.63  | -0.39 | 0.69692 |
| MRS2       | -0.03 | 7.43  | -0.39 | 0.69715 |
| LRRC25     | -0.05 | 12.00 | -0.39 | 0.69729 |
| UBE2V1     | -0.05 | 5.15  | -0.39 | 0.69739 |
| PIGO       | -0.03 | 8.28  | -0.39 | 0.69750 |
| SCNN1A     | -0.05 | 5.32  | -0.39 | 0.69755 |
| POGLUT3    | -0.04 | 6.33  | -0.39 | 0.69758 |
| CLIP3      | -0.05 | 5.39  | -0.39 | 0.69761 |
| ANTXRPL1   | 0.04  | 5.18  | 0.39  | 0.69767 |
| RPAP2      | -0.03 | 7.27  | -0.39 | 0.69796 |
| ELP3       | 0.03  | 9.08  | 0.39  | 0.69801 |
| RN7SL1     | 0.08  | 5.53  | 0.39  | 0.69817 |
| RAC1P2     | 0.05  | 7.66  | 0.39  | 0.69819 |
| TVP23C     | 0.04  | 5.55  | 0.39  | 0.69845 |
| LTBP2      | -0.05 | 6.53  | -0.39 | 0.69851 |
| TXK        | -0.05 | 7.56  | -0.39 | 0.69855 |
| GATD3B     | -0.04 | 5.35  | -0.39 | 0.69858 |
| GDAP1      | -0.04 | 5.28  | -0.39 | 0.69871 |
| ABO        | -0.09 | 5.78  | -0.39 | 0.69879 |
| ABHD12     | 0.04  | 8.94  | 0.39  | 0.69892 |
| FHL3       | 0.06  | 9.78  | 0.39  | 0.69922 |
| DGKD       | -0.04 | 10.98 | -0.39 | 0.69928 |
| LPAR2      | -0.06 | 11.41 | -0.39 | 0.69932 |
| DUSP14     | 0.05  | 6.59  | 0.39  | 0.69933 |
| FKBPL      | 0.04  | 6.62  | 0.39  | 0.69946 |
| RPL13P5    | 0.04  | 5.69  | 0.39  | 0.69988 |
| TMSB4X     | 0.04  | 14.88 | 0.39  | 0.70012 |
| TTC9       | -0.04 | 9.09  | -0.39 | 0.70019 |
| CKS1B      | 0.04  | 6.04  | 0.39  | 0.70020 |
| GSDMB      | 0.06  | 8.32  | 0.39  | 0.70033 |
| SQOR       | -0.04 | 10.03 | -0.39 | 0.70040 |
| PLEKHA1    | -0.04 | 7.34  | -0.39 | 0.70040 |
| USP27X     | -0.04 | 6.27  | -0.39 | 0.70041 |
| MIA2       | -0.02 | 8.65  | -0.39 | 0.70051 |
| MED22      | 0.03  | 9.47  | 0.39  | 0.70080 |
| CRTAP      | -0.03 | 10.50 | -0.39 | 0.70080 |
| AC026271.1 | -0.04 | 5.47  | -0.39 | 0.70081 |
| CHTF18     | 0.04  | 7.38  | 0.39  | 0.70114 |
| PIGP       | 0.04  | 6.34  | 0.39  | 0.70114 |
| C11orf80   | -0.05 | 6.43  | -0.39 | 0.70143 |
| FBXL14     | -0.03 | 7.99  | -0.39 | 0.70149 |
| CA3-AS1    | 0.06  | 5.19  | 0.39  | 0.70175 |
| DCAF8      | 0.03  | 9.11  | 0.38  | 0.70197 |
| AC006001.3 | 0.03  | 7.94  | 0.38  | 0.70198 |
| IL4R       | -0.06 | 11.91 | -0.38 | 0.70200 |
| NCL        | 0.03  | 11.73 | 0.38  | 0.70231 |
| AC073172.1 | -0.08 | 5.72  | -0.38 | 0.70237 |
| ALDH6A1    | 0.03  | 6.66  | 0.38  | 0.70290 |
| ESPN       | 0.11  | 8.20  | 0.38  | 0.70312 |
| ZNF778     | -0.03 | 7.08  | -0.38 | 0.70319 |



|            |       |       |       |         |
|------------|-------|-------|-------|---------|
| ACRBP      | 0.05  | 9.05  | 0.38  | 0.70320 |
| TBC1D1     | -0.03 | 10.48 | -0.38 | 0.70324 |
| FAM20B     | -0.02 | 8.30  | -0.38 | 0.70348 |
| KDM1A      | 0.02  | 9.11  | 0.38  | 0.70350 |
| TMEM121B   | 0.07  | 7.87  | 0.38  | 0.70365 |
| ORC1       | -0.05 | 5.32  | -0.38 | 0.70378 |
| LINC02158  | -0.06 | 6.69  | -0.38 | 0.70379 |
| AC060780.1 | -0.04 | 7.12  | -0.38 | 0.70383 |
| ARMC12     | -0.06 | 5.13  | -0.38 | 0.70395 |
| ABLIM2     | -0.04 | 5.46  | -0.38 | 0.70399 |
| ZNF589     | -0.03 | 8.16  | -0.38 | 0.70402 |
| SETP14     | -0.06 | 6.28  | -0.38 | 0.70406 |
| NUP210     | 0.03  | 11.83 | 0.38  | 0.70418 |
| SBNO1      | 0.02  | 9.28  | 0.38  | 0.70426 |
| MOSMO      | -0.03 | 6.49  | -0.38 | 0.70435 |
| YARS2      | 0.03  | 7.18  | 0.38  | 0.70437 |
| PTGES      | -0.06 | 5.41  | -0.38 | 0.70489 |
| NPIPA2     | -0.03 | 5.87  | -0.38 | 0.70490 |
| RNF10      | 0.07  | 12.74 | 0.38  | 0.70506 |
| WDR82      | 0.02  | 11.55 | 0.38  | 0.70507 |
| GNRH1      | -0.04 | 5.50  | -0.38 | 0.70524 |
| ZNF250     | 0.04  | 6.84  | 0.38  | 0.70527 |
| ODF2       | -0.02 | 9.13  | -0.38 | 0.70551 |
| INPP5B     | -0.03 | 8.69  | -0.38 | 0.70554 |
| SUCLG1     | 0.02  | 9.19  | 0.38  | 0.70558 |
| MYL4       | 0.11  | 9.45  | 0.38  | 0.70560 |
| FYN        | 0.02  | 11.16 | 0.38  | 0.70561 |
| AC020917.4 | -0.06 | 7.07  | -0.38 | 0.70567 |
| BST2       | 0.06  | 11.10 | 0.38  | 0.70572 |
| CDC7       | -0.04 | 5.37  | -0.38 | 0.70588 |
| PKMYT1     | 0.04  | 5.21  | 0.38  | 0.70612 |
| SECTM1     | -0.06 | 12.02 | -0.38 | 0.70623 |
| AC021097.1 | 0.04  | 5.72  | 0.38  | 0.70629 |
| SLC29A3    | 0.04  | 7.95  | 0.38  | 0.70631 |
| MLEC       | 0.03  | 10.05 | 0.38  | 0.70636 |
| ICA1       | 0.03  | 6.34  | 0.38  | 0.70637 |
| E2F6       | -0.03 | 6.21  | -0.38 | 0.70640 |
| CLEC9A     | -0.04 | 5.35  | -0.38 | 0.70647 |
| TMSB10P2   | 0.04  | 5.37  | 0.38  | 0.70654 |
| AC007780.1 | -0.05 | 5.66  | -0.38 | 0.70656 |
| MSRB2      | 0.06  | 8.35  | 0.38  | 0.70660 |
| LRRK2-DT   | -0.05 | 5.94  | -0.38 | 0.70661 |
| AC009093.8 | -0.06 | 5.98  | -0.38 | 0.70671 |
| COBLL1     | -0.05 | 5.86  | -0.38 | 0.70681 |
| FGFBP3     | 0.03  | 5.29  | 0.38  | 0.70688 |
| IGHV1-58   | 0.06  | 5.14  | 0.38  | 0.70711 |
| ITPRIPL1   | 0.04  | 7.49  | 0.38  | 0.70717 |
| MTHFD1L    | -0.05 | 6.41  | -0.38 | 0.70735 |
| MRNIP      | 0.05  | 8.48  | 0.38  | 0.70744 |
| ERCC3      | 0.02  | 9.13  | 0.38  | 0.70754 |

|            |       |       |       |         |
|------------|-------|-------|-------|---------|
| CXorf21    | -0.04 | 8.40  | -0.38 | 0.70754 |
| CTPS1      | -0.04 | 7.33  | -0.38 | 0.70771 |
| ME3        | -0.05 | 5.61  | -0.38 | 0.70771 |
| HTRA1      | 0.06  | 5.26  | 0.38  | 0.70773 |
| GOT1       | -0.03 | 7.67  | -0.38 | 0.70776 |
| GAPDHP72   | 0.04  | 5.25  | 0.38  | 0.70781 |
| HTATSF1    | 0.03  | 9.20  | 0.38  | 0.70795 |
| TTC7A      | 0.03  | 10.74 | 0.38  | 0.70802 |
| PPP1R13B   | 0.03  | 7.70  | 0.38  | 0.70806 |
| JAML       | -0.04 | 13.51 | -0.38 | 0.70815 |
| CETN3      | 0.03  | 6.08  | 0.38  | 0.70819 |
| MUC20      | 0.07  | 5.76  | 0.38  | 0.70822 |
| MYO18A     | -0.03 | 10.42 | -0.38 | 0.70825 |
| MICU1      | 0.03  | 9.73  | 0.38  | 0.70838 |
| AL031282.2 | -0.05 | 5.34  | -0.38 | 0.70841 |
| AC093157.1 | -0.04 | 6.20  | -0.38 | 0.70842 |
| RPL17P50   | 0.04  | 4.92  | 0.38  | 0.70845 |
| CRYGS      | 0.05  | 6.02  | 0.38  | 0.70849 |
| HDHD5      | 0.03  | 9.36  | 0.38  | 0.70860 |
| CTSK       | -0.04 | 6.60  | -0.38 | 0.70877 |
| RBBP7      | -0.02 | 9.49  | -0.38 | 0.70897 |
| PCBD2      | 0.04  | 6.52  | 0.38  | 0.70904 |
| LDHBP2     | 0.06  | 7.24  | 0.38  | 0.70907 |
| EPB41      | -0.03 | 11.45 | -0.38 | 0.70907 |
| C2orf68    | -0.02 | 9.57  | -0.38 | 0.70907 |
| MIR3936HG  | 0.04  | 4.94  | 0.37  | 0.70927 |
| INE1       | -0.05 | 5.18  | -0.37 | 0.70939 |
| TRIM68     | -0.03 | 7.36  | -0.37 | 0.70945 |
| IL17RC     | -0.05 | 5.77  | -0.37 | 0.70951 |
| ADAMTS1    | -0.06 | 5.68  | -0.37 | 0.70962 |
| WARS2      | -0.03 | 6.42  | -0.37 | 0.70966 |
| SF3A3P1    | -0.04 | 5.08  | -0.37 | 0.70973 |
| KCTD5      | 0.03  | 9.23  | 0.37  | 0.71001 |
| PTGFRN     | -0.06 | 5.64  | -0.37 | 0.71026 |
| MEAK7      | 0.03  | 7.01  | 0.37  | 0.71032 |
| PIGZ       | 0.04  | 5.38  | 0.37  | 0.71052 |
| EIF3IP1    | 0.04  | 5.18  | 0.37  | 0.71060 |
| APOO       | -0.03 | 6.18  | -0.37 | 0.71061 |
| TIGD3      | 0.06  | 8.38  | 0.37  | 0.71073 |
| MUTYH      | 0.04  | 5.27  | 0.37  | 0.71074 |
| TMBIM1     | -0.03 | 11.49 | -0.37 | 0.71088 |
| ABHD17AP6  | -0.03 | 5.29  | -0.37 | 0.71098 |
| GMPS       | 0.02  | 8.42  | 0.37  | 0.71099 |
| ZNF140     | 0.03  | 6.81  | 0.37  | 0.71104 |
| LEPROTL1   | 0.03  | 9.58  | 0.37  | 0.71112 |
| MBNL1-AS1  | -0.05 | 5.49  | -0.37 | 0.71112 |
| MED25      | 0.05  | 11.20 | 0.37  | 0.71114 |
| INTS13     | 0.04  | 7.06  | 0.37  | 0.71132 |
| KCNQ1OT1   | -0.05 | 4.94  | -0.37 | 0.71176 |
| NUFIP1     | 0.03  | 5.80  | 0.37  | 0.71178 |

|            |       |       |       |         |
|------------|-------|-------|-------|---------|
| ATP5MDP1   | 0.04  | 5.46  | 0.37  | 0.71194 |
| BCORP1     | -0.09 | 5.38  | -0.37 | 0.71195 |
| SLC7A5     | 0.06  | 8.61  | 0.37  | 0.71201 |
| SIAH2      | 0.04  | 9.66  | 0.37  | 0.71206 |
| HNRNPKP1   | -0.04 | 5.51  | -0.37 | 0.71216 |
| HAUS4      | -0.04 | 8.05  | -0.37 | 0.71225 |
| CD226      | 0.04  | 8.12  | 0.37  | 0.71234 |
| CLIC1      | 0.04  | 12.83 | 0.37  | 0.71292 |
| GTF2IP20   | 0.05  | 6.84  | 0.37  | 0.71300 |
| DOT1L      | 0.03  | 9.00  | 0.37  | 0.71303 |
| F8A1       | 0.05  | 8.64  | 0.37  | 0.71338 |
| RRP7BP     | -0.05 | 6.89  | -0.37 | 0.71339 |
| ATG10      | 0.04  | 6.09  | 0.37  | 0.71348 |
| GINM1      | -0.03 | 7.85  | -0.37 | 0.71359 |
| CNIH2      | 0.05  | 5.21  | 0.37  | 0.71362 |
| HSP90B2P   | -0.04 | 7.05  | -0.37 | 0.71380 |
| EIF4BP3    | -0.04 | 6.71  | -0.37 | 0.71392 |
| ZFYVE27    | 0.03  | 9.64  | 0.37  | 0.71417 |
| MRPL16     | 0.03  | 8.64  | 0.37  | 0.71421 |
| FTLP3      | 0.06  | 10.81 | 0.37  | 0.71435 |
| STIMATE    | 0.04  | 5.05  | 0.37  | 0.71478 |
| TMEM70     | -0.03 | 7.36  | -0.37 | 0.71485 |
| NEK3       | -0.03 | 6.04  | -0.37 | 0.71488 |
| RPL22P2    | 0.05  | 6.50  | 0.37  | 0.71489 |
| RTCA-AS1   | -0.05 | 5.75  | -0.37 | 0.71494 |
| AL133342.1 | 0.04  | 5.51  | 0.37  | 0.71512 |
| SH3BGRL    | -0.03 | 9.78  | -0.37 | 0.71525 |
| CRACR2A    | 0.02  | 7.94  | 0.37  | 0.71527 |
| TMEM9B     | -0.03 | 9.05  | -0.37 | 0.71529 |
| SEC22A     | 0.03  | 7.09  | 0.37  | 0.71534 |
| AKAP7      | 0.03  | 6.53  | 0.37  | 0.71543 |
| IGKV1-27   | 0.06  | 6.36  | 0.37  | 0.71548 |
| ALG11      | -0.03 | 5.41  | -0.37 | 0.71551 |
| CTSZ       | -0.04 | 12.74 | -0.37 | 0.71556 |
| ZNF280B    | 0.04  | 5.15  | 0.37  | 0.71557 |
| USP14      | 0.03  | 8.23  | 0.37  | 0.71559 |
| NPIP13     | -0.06 | 8.59  | -0.37 | 0.71569 |
| ARF6       | 0.02  | 10.97 | 0.37  | 0.71580 |
| AL355922.1 | -0.04 | 5.54  | -0.37 | 0.71593 |
| DGAT2      | -0.07 | 11.15 | -0.37 | 0.71595 |
| MUC20P1    | -0.05 | 5.14  | -0.37 | 0.71598 |
| ADA        | 0.04  | 8.91  | 0.37  | 0.71600 |
| ABHD10     | -0.03 | 7.55  | -0.37 | 0.71653 |
| NRN1       | -0.07 | 5.00  | -0.37 | 0.71654 |
| GRN        | 0.05  | 13.96 | 0.36  | 0.71667 |
| GRIN2D     | -0.05 | 5.27  | -0.36 | 0.71670 |
| HNRNPA1P30 | 0.04  | 5.02  | 0.36  | 0.71670 |
| CLOCK      | 0.04  | 6.71  | 0.36  | 0.71677 |
| LINC00205  | -0.04 | 7.01  | -0.36 | 0.71690 |
| LAMB3      | -0.04 | 5.27  | -0.36 | 0.71709 |

|            |       |       |       |         |
|------------|-------|-------|-------|---------|
| NT5E       | -0.06 | 6.28  | -0.36 | 0.71713 |
| EPHA2      | 0.05  | 5.20  | 0.36  | 0.71714 |
| OR4D1      | -0.04 | 5.67  | -0.36 | 0.71718 |
| ENY2       | 0.03  | 8.90  | 0.36  | 0.71748 |
| NDUFB2-AS1 | -0.04 | 5.27  | -0.36 | 0.71751 |
| SRGAP2C    | -0.04 | 6.30  | -0.36 | 0.71784 |
| CIB2       | 0.04  | 5.89  | 0.36  | 0.71799 |
| FITM1      | 0.04  | 5.52  | 0.36  | 0.71803 |
| CBWD6      | 0.05  | 6.32  | 0.36  | 0.71823 |
| AC093599.2 | 0.06  | 5.02  | 0.36  | 0.71829 |
| FUNDC1     | -0.04 | 6.33  | -0.36 | 0.71845 |
| LAMB2      | -0.04 | 6.83  | -0.36 | 0.71853 |
| AKT1       | 0.03  | 11.82 | 0.36  | 0.71855 |
| AC093827.4 | -0.05 | 5.03  | -0.36 | 0.71862 |
| ZNF302     | -0.05 | 7.22  | -0.36 | 0.71867 |
| GIN54      | 0.03  | 5.79  | 0.36  | 0.71875 |
| ASCC1      | 0.03  | 7.32  | 0.36  | 0.71876 |
| MPP5       | -0.04 | 5.62  | -0.36 | 0.71886 |
| URI1       | -0.03 | 8.86  | -0.36 | 0.71913 |
| MT1X       | -0.04 | 5.56  | -0.36 | 0.71923 |
| GTF2IRD2   | 0.04  | 6.17  | 0.36  | 0.71925 |
| AL358942.1 | -0.04 | 5.03  | -0.36 | 0.71927 |
| SSR3       | -0.03 | 9.30  | -0.36 | 0.71931 |
| CAMKK1     | 0.05  | 8.61  | 0.36  | 0.71936 |
| ZNF84      | -0.03 | 6.86  | -0.36 | 0.71945 |
| AP000866.1 | 0.04  | 5.23  | 0.36  | 0.71952 |
| SLC16A13   | 0.04  | 6.62  | 0.36  | 0.71957 |
| AL158801.6 | 0.04  | 5.63  | 0.36  | 0.71959 |
| NQO1       | -0.04 | 5.53  | -0.36 | 0.71961 |
| CROCCP3    | -0.04 | 5.80  | -0.36 | 0.71966 |
| RPA1       | 0.02  | 10.23 | 0.36  | 0.71983 |
| SFR1       | -0.04 | 5.86  | -0.36 | 0.71987 |
| RTKN       | 0.05  | 5.55  | 0.36  | 0.71996 |
| CHEK2      | 0.04  | 6.41  | 0.36  | 0.72007 |
| CUL4A      | -0.02 | 9.73  | -0.36 | 0.72010 |
| AC040160.1 | -0.05 | 7.18  | -0.36 | 0.72018 |
| TAF1B      | -0.03 | 5.90  | -0.36 | 0.72024 |
| KLHDC1     | -0.04 | 5.06  | -0.36 | 0.72047 |
| ACTG1P23   | -0.03 | 5.07  | -0.36 | 0.72066 |
| AIMP2      | 0.03  | 7.81  | 0.36  | 0.72075 |
| FAM157A    | -0.07 | 9.13  | -0.36 | 0.72078 |
| DNM2       | -0.03 | 12.10 | -0.36 | 0.72086 |
| AC092384.1 | 0.03  | 5.32  | 0.36  | 0.72096 |
| ARL14EP    | -0.03 | 7.53  | -0.36 | 0.72110 |
| ARHGEF37   | -0.07 | 5.02  | -0.36 | 0.72126 |
| CSNK2A1    | -0.02 | 9.21  | -0.36 | 0.72134 |
| ROCK1      | -0.04 | 9.40  | -0.36 | 0.72148 |
| ALKBH1     | 0.02  | 7.28  | 0.36  | 0.72155 |
| ACYP1      | 0.04  | 5.85  | 0.36  | 0.72160 |
| AC004057.1 | 0.11  | 7.54  | 0.36  | 0.72166 |

|            |       |       |       |         |
|------------|-------|-------|-------|---------|
| ZNF57      | 0.03  | 5.72  | 0.36  | 0.72180 |
| HVCN1      | 0.03  | 10.43 | 0.36  | 0.72190 |
| WDR55      | -0.02 | 9.08  | -0.36 | 0.72192 |
| APOBR      | 0.05  | 11.88 | 0.36  | 0.72197 |
| GPAT2      | -0.09 | 5.88  | -0.36 | 0.72209 |
| GPR157     | 0.03  | 6.84  | 0.36  | 0.72250 |
| IGKV1D-12  | 0.06  | 5.47  | 0.36  | 0.72281 |
| ZNF440     | 0.03  | 7.00  | 0.36  | 0.72287 |
| IGLV4-60   | -0.07 | 5.33  | -0.36 | 0.72303 |
| WARS2-AS1  | -0.03 | 6.30  | -0.36 | 0.72308 |
| TRAPPC2B   | 0.04  | 5.86  | 0.36  | 0.72335 |
| NAXD       | 0.03  | 8.46  | 0.36  | 0.72354 |
| TMEM143    | 0.03  | 6.80  | 0.36  | 0.72359 |
| DAAM1      | 0.03  | 6.66  | 0.36  | 0.72360 |
| ARHGAP1    | 0.02  | 11.26 | 0.36  | 0.72361 |
| PDCL3P4    | 0.04  | 5.22  | 0.36  | 0.72362 |
| ARHGAP10   | 0.04  | 7.15  | 0.36  | 0.72396 |
| B9D2       | 0.04  | 8.23  | 0.36  | 0.72396 |
| USP30      | -0.03 | 6.87  | -0.36 | 0.72401 |
| YTHDF1     | 0.02  | 9.65  | 0.35  | 0.72414 |
| AC011921.3 | 0.04  | 5.21  | 0.35  | 0.72421 |
| MT2P1      | -0.07 | 5.89  | -0.35 | 0.72435 |
| HNRNPDP1   | -0.04 | 5.85  | -0.35 | 0.72470 |
| ZNF174     | -0.02 | 7.55  | -0.35 | 0.72473 |
| BOD1L1     | -0.04 | 10.80 | -0.35 | 0.72509 |
| TRIP11     | 0.02  | 7.76  | 0.35  | 0.72521 |
| CDC16      | 0.02  | 9.11  | 0.35  | 0.72523 |
| TINF2      | 0.02  | 10.39 | 0.35  | 0.72525 |
| ERCC5      | -0.05 | 5.12  | -0.35 | 0.72531 |
| IL12RB2    | 0.05  | 6.31  | 0.35  | 0.72558 |
| ZNF37A     | -0.03 | 7.37  | -0.35 | 0.72568 |
| COPZ2      | 0.04  | 5.77  | 0.35  | 0.72576 |
| AL357143.1 | -0.05 | 5.14  | -0.35 | 0.72595 |
| TRMT11     | -0.03 | 5.87  | -0.35 | 0.72608 |
| SIAH1      | -0.03 | 7.01  | -0.35 | 0.72609 |
| PARP2      | 0.03  | 6.90  | 0.35  | 0.72614 |
| DENND10    | 0.03  | 8.65  | 0.35  | 0.72626 |
| GAPDHP71   | -0.03 | 5.19  | -0.35 | 0.72637 |
| CD200R1    | -0.04 | 6.18  | -0.35 | 0.72644 |
| AZU1       | 0.10  | 6.66  | 0.35  | 0.72648 |
| SLC35E2A   | -0.07 | 8.83  | -0.35 | 0.72648 |
| CISD1      | -0.04 | 6.52  | -0.35 | 0.72675 |
| ADIRF-AS1  | 0.04  | 5.62  | 0.35  | 0.72692 |
| SDHAP1     | -0.03 | 7.03  | -0.35 | 0.72694 |
| AL035661.1 | -0.08 | 6.09  | -0.35 | 0.72697 |
| H2AW       | -0.04 | 6.55  | -0.35 | 0.72705 |
| AL357033.3 | 0.04  | 5.55  | 0.35  | 0.72708 |
| AC064805.2 | 0.04  | 5.18  | 0.35  | 0.72724 |
| HLA-DPB1   | 0.05  | 13.20 | 0.35  | 0.72732 |
| UBE2G1     | -0.02 | 9.12  | -0.35 | 0.72737 |

|            |       |       |       |         |
|------------|-------|-------|-------|---------|
| NDUFV2P1   | -0.04 | 5.95  | -0.35 | 0.72747 |
| HES6       | -0.04 | 5.69  | -0.35 | 0.72756 |
| TUBGCP4    | 0.04  | 7.62  | 0.35  | 0.72758 |
| WDR86      | 0.04  | 5.26  | 0.35  | 0.72795 |
| ADAM12     | 0.05  | 5.33  | 0.35  | 0.72797 |
| ICOSLG     | -0.05 | 5.85  | -0.35 | 0.72814 |
| AL390119.2 | -0.04 | 5.02  | -0.35 | 0.72829 |
| SPON2      | 0.06  | 10.28 | 0.35  | 0.72835 |
| VTI1A      | -0.02 | 8.02  | -0.35 | 0.72854 |
| AL391058.1 | 0.04  | 5.11  | 0.35  | 0.72879 |
| POTEI      | 0.03  | 5.67  | 0.35  | 0.72921 |
| AL669831.3 | 0.04  | 5.11  | 0.35  | 0.72924 |
| LINC00853  | 0.05  | 5.98  | 0.35  | 0.72930 |
| COX5AP2    | 0.05  | 5.33  | 0.35  | 0.72942 |
| NGFR       | -0.04 | 5.14  | -0.35 | 0.72955 |
| YPEL4      | 0.07  | 5.96  | 0.35  | 0.72972 |
| PEX3       | -0.03 | 5.75  | -0.35 | 0.72974 |
| CAMTA2     | -0.03 | 10.68 | -0.35 | 0.72978 |
| OXER1      | -0.05 | 8.12  | -0.35 | 0.72982 |
| AC103591.1 | -0.04 | 5.07  | -0.35 | 0.72996 |
| CEP19      | -0.05 | 8.27  | -0.35 | 0.73021 |
| TSPEAR     | -0.06 | 5.25  | -0.35 | 0.73022 |
| SPIN3      | -0.03 | 6.26  | -0.35 | 0.73025 |
| AC004980.1 | 0.03  | 5.45  | 0.35  | 0.73058 |
| KBTBD6     | 0.04  | 6.44  | 0.35  | 0.73072 |
| TMEM69     | -0.03 | 8.23  | -0.35 | 0.73073 |
| PARP1P1    | -0.05 | 5.60  | -0.35 | 0.73079 |
| IGLV3-12   | -0.10 | 5.54  | -0.35 | 0.73083 |
| POM121     | -0.02 | 9.53  | -0.35 | 0.73086 |
| BMP8B      | -0.04 | 5.71  | -0.35 | 0.73094 |
| LINC01504  | -0.03 | 5.86  | -0.35 | 0.73096 |
| AL590762.1 | -0.04 | 5.41  | -0.35 | 0.73109 |
| ORM1       | 0.11  | 7.52  | 0.35  | 0.73118 |
| SPNS1      | 0.04  | 5.06  | 0.35  | 0.73140 |
| EPOR       | 0.03  | 8.25  | 0.35  | 0.73147 |
| TOB1-AS1   | 0.04  | 5.55  | 0.34  | 0.73160 |
| MPC1       | -0.02 | 8.02  | -0.34 | 0.73161 |
| GATB       | 0.03  | 7.66  | 0.34  | 0.73166 |
| AC004846.1 | -0.04 | 5.20  | -0.34 | 0.73198 |
| ZDHHC2     | 0.04  | 8.47  | 0.34  | 0.73198 |
| FAM156A    | -0.04 | 5.51  | -0.34 | 0.73199 |
| MFSD13A    | -0.04 | 7.33  | -0.34 | 0.73210 |
| NMRK1      | -0.03 | 7.86  | -0.34 | 0.73216 |
| CTDP1      | 0.03  | 9.41  | 0.34  | 0.73218 |
| AC106886.3 | -0.05 | 4.97  | -0.34 | 0.73222 |
| DENR       | -0.02 | 8.60  | -0.34 | 0.73237 |
| C1orf174   | -0.02 | 8.45  | -0.34 | 0.73285 |
| TAGLN2     | 0.04  | 14.40 | 0.34  | 0.73299 |
| DNM3       | -0.04 | 5.90  | -0.34 | 0.73308 |
| OTUD7B     | 0.03  | 6.77  | 0.34  | 0.73334 |

|            |       |       |       |         |
|------------|-------|-------|-------|---------|
| PECR       | 0.03  | 7.26  | 0.34  | 0.73334 |
| GALNT8     | 0.05  | 5.27  | 0.34  | 0.73342 |
| C2orf42    | 0.02  | 7.69  | 0.34  | 0.73342 |
| DOK7       | 0.05  | 5.13  | 0.34  | 0.73351 |
| POC1B-AS1  | -0.03 | 5.46  | -0.34 | 0.73378 |
| NCBP2      | -0.03 | 8.27  | -0.34 | 0.73378 |
| ARL1       | 0.02  | 7.74  | 0.34  | 0.73379 |
| LINC02604  | 0.04  | 6.66  | 0.34  | 0.73380 |
| FAM192BP   | 0.04  | 5.67  | 0.34  | 0.73380 |
| UNC119     | -0.03 | 10.84 | -0.34 | 0.73389 |
| PIM2       | 0.03  | 11.65 | 0.34  | 0.73394 |
| BEND7      | -0.06 | 5.60  | -0.34 | 0.73397 |
| TMEM198B   | 0.04  | 8.27  | 0.34  | 0.73407 |
| ASH2L      | -0.02 | 9.27  | -0.34 | 0.73409 |
| YOD1       | -0.07 | 7.01  | -0.34 | 0.73421 |
| GET4       | 0.04  | 5.93  | 0.34  | 0.73438 |
| TBC1D3G    | 0.03  | 6.40  | 0.34  | 0.73479 |
| RPS2P32    | 0.03  | 5.08  | 0.34  | 0.73479 |
| ZNF485     | -0.03 | 5.78  | -0.34 | 0.73479 |
| ZNF18      | -0.03 | 8.15  | -0.34 | 0.73490 |
| ARHGAP17   | 0.02  | 10.33 | 0.34  | 0.73520 |
| EPHX1      | 0.04  | 7.47  | 0.34  | 0.73536 |
| PHF24      | -0.06 | 5.20  | -0.34 | 0.73540 |
| ARL5A      | -0.03 | 6.96  | -0.34 | 0.73549 |
| IFITM1     | -0.05 | 11.19 | -0.34 | 0.73558 |
| NQO2       | 0.06  | 10.00 | 0.34  | 0.73569 |
| PSMC1P1    | -0.04 | 6.63  | -0.34 | 0.73572 |
| RAD18      | -0.02 | 6.76  | -0.34 | 0.73574 |
| BCAM       | 0.09  | 6.01  | 0.34  | 0.73577 |
| NPIP811    | -0.05 | 7.90  | -0.34 | 0.73585 |
| IGLV2-11   | -0.07 | 7.68  | -0.34 | 0.73595 |
| HDAC1P2    | 0.03  | 5.13  | 0.34  | 0.73601 |
| TRAV10     | 0.05  | 5.41  | 0.34  | 0.73615 |
| WNT5B      | 0.05  | 5.57  | 0.34  | 0.73619 |
| AC135507.1 | 0.04  | 5.49  | 0.34  | 0.73644 |
| C1orf127   | 0.04  | 5.01  | 0.34  | 0.73661 |
| DSTN       | -0.03 | 8.91  | -0.34 | 0.73668 |
| GIN1       | -0.03 | 6.31  | -0.34 | 0.73672 |
| ZFP14      | -0.03 | 6.76  | -0.34 | 0.73675 |
| LZTR1      | -0.04 | 7.76  | -0.34 | 0.73677 |
| THBS1      | 0.07  | 9.00  | 0.34  | 0.73683 |
| SRP72P2    | 0.03  | 5.08  | 0.34  | 0.73683 |
| OLIG2      | 0.06  | 5.53  | 0.34  | 0.73691 |
| PIEZO1     | -0.03 | 11.10 | -0.34 | 0.73696 |
| NAGK       | -0.04 | 11.93 | -0.34 | 0.73717 |
| SOCS2-AS1  | -0.03 | 5.26  | -0.34 | 0.73721 |
| NINJ2-AS1  | -0.03 | 7.69  | -0.34 | 0.73738 |
| RDH16      | -0.04 | 5.36  | -0.34 | 0.73745 |
| TRMT10C    | -0.03 | 7.22  | -0.34 | 0.73746 |
| MZF1       | 0.04  | 8.53  | 0.34  | 0.73758 |

|            |       |       |       |         |
|------------|-------|-------|-------|---------|
| VDAC3P1    | -0.04 | 5.12  | -0.34 | 0.73760 |
| NFE2       | 0.06  | 12.23 | 0.34  | 0.73764 |
| PA2G4P4    | 0.04  | 6.04  | 0.34  | 0.73798 |
| ANXA7      | -0.02 | 10.08 | -0.34 | 0.73802 |
| ASIC3      | -0.05 | 5.97  | -0.34 | 0.73838 |
| ABCC3      | -0.06 | 8.96  | -0.34 | 0.73846 |
| ANKRD24    | -0.04 | 5.12  | -0.34 | 0.73855 |
| IRF7       | -0.06 | 10.19 | -0.34 | 0.73868 |
| AC144831.1 | -0.04 | 5.83  | -0.34 | 0.73871 |
| GPRASP1    | 0.05  | 7.04  | 0.34  | 0.73879 |
| PNRC1      | -0.03 | 11.46 | -0.34 | 0.73884 |
| ATXN2L     | -0.03 | 10.92 | -0.34 | 0.73884 |
| KLHDC4     | -0.03 | 9.41  | -0.34 | 0.73889 |
| SRCAP      | -0.03 | 6.00  | -0.34 | 0.73892 |
| ATXN10     | 0.03  | 9.09  | 0.33  | 0.73910 |
| PABPC3     | -0.05 | 8.92  | -0.33 | 0.73920 |
| ASMTL-AS1  | -0.05 | 6.47  | -0.33 | 0.73940 |
| WDR75      | -0.03 | 7.76  | -0.33 | 0.73948 |
| AC007686.4 | 0.06  | 5.54  | 0.33  | 0.73963 |
| UNC13D     | 0.03  | 12.41 | 0.33  | 0.73990 |
| GCFC2      | -0.03 | 6.37  | -0.33 | 0.73996 |
| ITGA6-AS1  | 0.05  | 5.67  | 0.33  | 0.74001 |
| AC010683.1 | -0.03 | 5.27  | -0.33 | 0.74004 |
| KRT72      | 0.10  | 7.25  | 0.33  | 0.74013 |
| ZNF473     | -0.02 | 6.84  | -0.33 | 0.74030 |
| ARID1A     | 0.03  | 11.61 | 0.33  | 0.74035 |
| LAIR1      | 0.03  | 10.47 | 0.33  | 0.74050 |
| VIRMA      | -0.02 | 8.76  | -0.33 | 0.74054 |
| HSPA4      | -0.02 | 9.52  | -0.33 | 0.74101 |
| RIMKLB     | -0.04 | 5.96  | -0.33 | 0.74107 |
| IDO1       | -0.08 | 6.22  | -0.33 | 0.74110 |
| AC022210.2 | -0.04 | 4.93  | -0.33 | 0.74142 |
| EIF1B-AS1  | 0.03  | 5.69  | 0.33  | 0.74143 |
| FAM209A    | -0.04 | 5.36  | -0.33 | 0.74153 |
| LRRC1      | 0.03  | 5.36  | 0.33  | 0.74156 |
| AC003102.1 | 0.05  | 6.24  | 0.33  | 0.74162 |
| TRIM41     | 0.02  | 9.23  | 0.33  | 0.74191 |
| TRAV12-3   | 0.04  | 6.15  | 0.33  | 0.74192 |
| GNAL       | -0.05 | 5.37  | -0.33 | 0.74206 |
| AC023232.1 | -0.04 | 5.06  | -0.33 | 0.74226 |
| ERVK3-1    | -0.03 | 6.67  | -0.33 | 0.74247 |
| SENCR      | 0.04  | 6.87  | 0.33  | 0.74248 |
| LINC01089  | 0.05  | 8.71  | 0.33  | 0.74261 |
| SNRNP27    | 0.03  | 7.07  | 0.33  | 0.74297 |
| ARPC3      | -0.03 | 11.89 | -0.33 | 0.74314 |
| TCIRG1     | 0.04  | 12.64 | 0.33  | 0.74346 |
| AC027801.1 | -0.06 | 5.73  | -0.33 | 0.74347 |
| NFKBIE     | 0.04  | 8.82  | 0.33  | 0.74350 |
| DHX38      | 0.02  | 10.38 | 0.33  | 0.74368 |
| ZNF160     | -0.02 | 8.37  | -0.33 | 0.74370 |



|            |       |       |       |         |
|------------|-------|-------|-------|---------|
| MED8       | 0.02  | 8.98  | 0.33  | 0.74370 |
| LILRA5     | -0.06 | 11.51 | -0.33 | 0.74379 |
| TMEM175    | 0.03  | 9.47  | 0.33  | 0.74379 |
| KAT6B      | -0.03 | 8.29  | -0.33 | 0.74385 |
| YBX1P10    | -0.04 | 7.13  | -0.33 | 0.74392 |
| RHOBTB1    | -0.04 | 5.90  | -0.33 | 0.74428 |
| PSMB3P2    | 0.04  | 5.61  | 0.33  | 0.74450 |
| RTP5       | 0.05  | 5.50  | 0.33  | 0.74454 |
| LINC02772  | -0.07 | 5.43  | -0.33 | 0.74461 |
| ZFYVE9     | 0.03  | 5.60  | 0.33  | 0.74468 |
| GPR183     | 0.04  | 8.72  | 0.33  | 0.74478 |
| DHX8       | -0.02 | 10.16 | -0.33 | 0.74484 |
| RNF5P1     | -0.04 | 5.58  | -0.33 | 0.74514 |
| RBM43      | -0.04 | 6.47  | -0.33 | 0.74524 |
| AC078883.1 | -0.04 | 5.88  | -0.33 | 0.74524 |
| CEACAM3    | -0.05 | 10.73 | -0.33 | 0.74525 |
| PTX3       | -0.04 | 5.24  | -0.33 | 0.74533 |
| RAD1       | -0.02 | 7.17  | -0.33 | 0.74559 |
| C16orf54   | -0.03 | 11.28 | -0.33 | 0.74560 |
| PSME2      | 0.04  | 10.64 | 0.33  | 0.74574 |
| SERPINE2   | -0.04 | 5.31  | -0.33 | 0.74577 |
| FLVCR1-DT  | 0.05  | 6.49  | 0.33  | 0.74585 |
| AC005261.2 | -0.03 | 7.97  | -0.33 | 0.74587 |
| TBC1D19    | 0.03  | 5.20  | 0.33  | 0.74595 |
| UBE2E3     | -0.03 | 8.39  | -0.33 | 0.74597 |
| DAP        | 0.03  | 10.60 | 0.33  | 0.74612 |
| CCDC50     | -0.03 | 8.03  | -0.33 | 0.74612 |
| AK3        | 0.03  | 7.40  | 0.33  | 0.74624 |
| SYNGR1     | 0.04  | 7.53  | 0.32  | 0.74668 |
| TXNDC17    | 0.03  | 8.26  | 0.32  | 0.74668 |
| BX539320.1 | -0.04 | 5.00  | -0.32 | 0.74678 |
| OXCT1      | 0.03  | 7.45  | 0.32  | 0.74688 |
| SLC29A1    | 0.05  | 8.35  | 0.32  | 0.74695 |
| PLIN5      | -0.07 | 7.81  | -0.32 | 0.74716 |
| IGKV1D-8   | -0.04 | 5.17  | -0.32 | 0.74746 |
| EIF3J-DT   | 0.03  | 7.16  | 0.32  | 0.74752 |
| AC093752.1 | -0.04 | 6.47  | -0.32 | 0.74757 |
| LSM12      | -0.03 | 6.31  | -0.32 | 0.74796 |
| TSGA10     | 0.03  | 5.45  | 0.32  | 0.74814 |
| SAPCD2     | -0.05 | 5.79  | -0.32 | 0.74838 |
| RAN        | -0.03 | 10.84 | -0.32 | 0.74847 |
| FOXO4      | -0.04 | 10.03 | -0.32 | 0.74865 |
| TNS2       | 0.04  | 5.10  | 0.32  | 0.74866 |
| AC018371.2 | 0.04  | 5.56  | 0.32  | 0.74868 |
| MIF4GD     | 0.03  | 9.27  | 0.32  | 0.74871 |
| EEF1A2     | 0.04  | 5.12  | 0.32  | 0.74875 |
| EXOSC9     | 0.02  | 7.96  | 0.32  | 0.74886 |
| ALG6       | -0.02 | 6.83  | -0.32 | 0.74889 |
| PDCD5      | -0.03 | 7.96  | -0.32 | 0.74931 |
| MTERF4     | 0.03  | 8.93  | 0.32  | 0.74933 |

|            |       |       |       |         |
|------------|-------|-------|-------|---------|
| IFT80      | 0.03  | 5.54  | 0.32  | 0.74935 |
| CPAMD8     | 0.05  | 7.17  | 0.32  | 0.74938 |
| BLCAP      | 0.02  | 9.82  | 0.32  | 0.74948 |
| ZHX1       | -0.03 | 6.99  | -0.32 | 0.74965 |
| RGMB       | 0.05  | 6.31  | 0.32  | 0.74967 |
| IGHG1      | -0.12 | 11.19 | -0.32 | 0.74978 |
| NKAPP1     | -0.03 | 5.05  | -0.32 | 0.74979 |
| AL109615.4 | -0.04 | 5.28  | -0.32 | 0.74980 |
| SRSF7      | -0.02 | 10.06 | -0.32 | 0.74994 |
| MYBPC3     | -0.05 | 7.95  | -0.32 | 0.74995 |
| GUSBP1     | -0.03 | 6.09  | -0.32 | 0.74996 |
| ZNF747     | 0.03  | 6.92  | 0.32  | 0.75014 |
| EPS15L1    | 0.02  | 9.97  | 0.32  | 0.75015 |
| ARPC2      | -0.03 | 13.24 | -0.32 | 0.75031 |
| MATN1-AS1  | -0.04 | 6.31  | -0.32 | 0.75041 |
| GPR162     | -0.05 | 8.59  | -0.32 | 0.75044 |
| AC092652.2 | 0.04  | 5.00  | 0.32  | 0.75049 |
| AC023424.2 | -0.03 | 5.26  | -0.32 | 0.75055 |
| BPI        | -0.11 | 7.99  | -0.32 | 0.75057 |
| CIP2A      | 0.04  | 5.10  | 0.32  | 0.75075 |
| LMCD1      | 0.04  | 5.05  | 0.32  | 0.75076 |
| PTCD2      | -0.03 | 6.20  | -0.32 | 0.75103 |
| AC009126.1 | 0.03  | 5.55  | 0.32  | 0.75114 |
| TMEM45B    | -0.05 | 6.60  | -0.32 | 0.75117 |
| GTDC1      | -0.04 | 7.58  | -0.32 | 0.75143 |
| NET1       | -0.04 | 6.39  | -0.32 | 0.75166 |
| PEX12      | -0.03 | 6.25  | -0.32 | 0.75168 |
| KBTBD8     | -0.04 | 5.78  | -0.32 | 0.75177 |
| SBF1P1     | 0.04  | 5.59  | 0.32  | 0.75186 |
| CRABP2     | 0.04  | 5.46  | 0.32  | 0.75186 |
| SLC22A23   | -0.05 | 7.10  | -0.32 | 0.75220 |
| SYAP1      | 0.02  | 8.65  | 0.32  | 0.75221 |
| WRNIP1     | 0.02  | 9.15  | 0.32  | 0.75221 |
| TALDO1     | 0.04  | 13.60 | 0.32  | 0.75278 |
| LDLRAD4    | 0.02  | 7.87  | 0.32  | 0.75287 |
| GAR1       | 0.03  | 6.87  | 0.32  | 0.75289 |
| H2BC11     | -0.05 | 6.85  | -0.32 | 0.75316 |
| PCYOX1     | -0.03 | 7.72  | -0.32 | 0.75323 |
| RPL17      | -0.03 | 5.42  | -0.32 | 0.75325 |
| PPIP5K1    | 0.03  | 6.88  | 0.32  | 0.75332 |
| AC018638.5 | 0.04  | 7.57  | 0.32  | 0.75345 |
| PTPN23     | 0.02  | 9.92  | 0.32  | 0.75351 |
| SETD9      | -0.04 | 5.08  | -0.32 | 0.75363 |
| SLC4A5     | -0.04 | 5.15  | -0.32 | 0.75365 |
| ZNF546     | -0.03 | 5.51  | -0.32 | 0.75367 |
| MALT1      | 0.02  | 8.65  | 0.31  | 0.75421 |
| ZNF542P    | -0.03 | 6.64  | -0.31 | 0.75433 |
| SNHG30     | 0.03  | 6.06  | 0.31  | 0.75443 |
| H2AZP3     | 0.03  | 5.20  | 0.31  | 0.75454 |
| DCAF7      | 0.02  | 10.43 | 0.31  | 0.75476 |

|              |       |       |       |         |
|--------------|-------|-------|-------|---------|
| KDM2B        | 0.02  | 9.14  | 0.31  | 0.75480 |
| GAPDHP65     | 0.05  | 6.94  | 0.31  | 0.75482 |
| ZNF823       | 0.03  | 5.51  | 0.31  | 0.75485 |
| TXNDC15      | -0.02 | 8.33  | -0.31 | 0.75495 |
| EIF1B        | 0.04  | 9.57  | 0.31  | 0.75496 |
| CABLES1      | 0.04  | 4.98  | 0.31  | 0.75510 |
| RETSAT       | 0.03  | 8.66  | 0.31  | 0.75518 |
| CCDC51       | 0.02  | 6.95  | 0.31  | 0.75539 |
| FKBP4        | 0.03  | 9.42  | 0.31  | 0.75542 |
| KIT          | -0.04 | 5.16  | -0.31 | 0.75543 |
| ABCC10       | 0.02  | 8.93  | 0.31  | 0.75551 |
| LINC00671    | 0.05  | 5.71  | 0.31  | 0.75563 |
| ZNF277       | 0.03  | 7.52  | 0.31  | 0.75567 |
| AC119396.1   | 0.05  | 8.11  | 0.31  | 0.75590 |
| GMCL1        | -0.03 | 7.99  | -0.31 | 0.75592 |
| ADAMTS17     | -0.04 | 5.27  | -0.31 | 0.75595 |
| RPL27AP      | 0.05  | 6.34  | 0.31  | 0.75596 |
| DENND1A      | -0.02 | 10.03 | -0.31 | 0.75597 |
| IGLV5-45     | -0.06 | 5.46  | -0.31 | 0.75631 |
| LRRC27       | 0.04  | 6.77  | 0.31  | 0.75631 |
| SHB          | -0.04 | 4.96  | -0.31 | 0.75631 |
| TRAV26-1     | -0.04 | 5.95  | -0.31 | 0.75641 |
| GID4         | -0.03 | 7.79  | -0.31 | 0.75646 |
| SEH1L        | -0.03 | 7.54  | -0.31 | 0.75647 |
| SMPD3        | -0.05 | 7.49  | -0.31 | 0.75655 |
| PSPH         | -0.04 | 5.74  | -0.31 | 0.75693 |
| CERS5        | 0.02  | 9.28  | 0.31  | 0.75708 |
| ARMC10       | 0.02  | 7.40  | 0.31  | 0.75712 |
| RAB3GAP1     | -0.02 | 8.97  | -0.31 | 0.75714 |
| SLC25A25-AS1 | -0.05 | 7.49  | -0.31 | 0.75723 |
| CDR2         | -0.03 | 8.58  | -0.31 | 0.75755 |
| RSL24D1      | 0.03  | 8.19  | 0.31  | 0.75769 |
| TBC1D32      | -0.03 | 5.27  | -0.31 | 0.75769 |
| SMG5         | -0.03 | 10.76 | -0.31 | 0.75780 |
| ST6GAL1      | 0.03  | 11.40 | 0.31  | 0.75782 |
| IGKV2D-29    | -0.07 | 5.61  | -0.31 | 0.75784 |
| AL162458.1   | 0.03  | 5.80  | 0.31  | 0.75791 |
| TK2          | 0.02  | 9.16  | 0.31  | 0.75794 |
| RNASE6       | -0.05 | 9.85  | -0.31 | 0.75806 |
| PRKAG1       | 0.02  | 9.06  | 0.31  | 0.75810 |
| TFCP2L1      | 0.05  | 5.42  | 0.31  | 0.75826 |
| LY6E         | 0.06  | 11.53 | 0.31  | 0.75836 |
| ZNF554       | 0.02  | 6.49  | 0.31  | 0.75837 |
| JAK3         | 0.04  | 11.79 | 0.31  | 0.75851 |
| HSPA8        | -0.02 | 13.59 | -0.31 | 0.75855 |
| TBL1XR1      | -0.02 | 9.23  | -0.31 | 0.75862 |
| TAS1R3       | -0.04 | 5.28  | -0.31 | 0.75871 |
| TMCC2        | 0.08  | 8.14  | 0.31  | 0.75879 |
| AC012513.3   | -0.03 | 5.07  | -0.31 | 0.75918 |
| FTH1P10      | 0.04  | 8.25  | 0.31  | 0.75929 |

|            |       |       |       |         |
|------------|-------|-------|-------|---------|
| SMAP1      | -0.02 | 8.82  | -0.31 | 0.75930 |
| CARD9      | 0.04  | 8.71  | 0.31  | 0.75950 |
| GPR171     | 0.03  | 7.32  | 0.31  | 0.75955 |
| UPK3B      | -0.04 | 5.47  | -0.31 | 0.75961 |
| FOXO3      | 0.05  | 9.73  | 0.31  | 0.75964 |
| ZNF620     | -0.03 | 5.32  | -0.31 | 0.75991 |
| CEACAM21   | 0.04  | 8.52  | 0.31  | 0.75992 |
| HNRNPA1P4  | -0.03 | 5.37  | -0.31 | 0.76023 |
| KIAA1191   | -0.02 | 8.85  | -0.31 | 0.76035 |
| AC007032.1 | 0.04  | 5.51  | 0.31  | 0.76035 |
| HDAC2      | -0.02 | 8.42  | -0.31 | 0.76049 |
| RAB1C      | 0.04  | 6.39  | 0.31  | 0.76050 |
| ZNF281     | -0.04 | 7.92  | -0.31 | 0.76060 |
| AL391416.1 | -0.03 | 4.91  | -0.31 | 0.76068 |
| FBXL6      | 0.03  | 8.12  | 0.31  | 0.76074 |
| CXCL1      | -0.04 | 6.43  | -0.31 | 0.76077 |
| FCRL3      | -0.05 | 9.11  | -0.31 | 0.76086 |
| UMAD1      | -0.03 | 6.49  | -0.31 | 0.76088 |
| AL121839.2 | -0.03 | 6.18  | -0.31 | 0.76102 |
| BTBD7      | -0.02 | 7.79  | -0.31 | 0.76104 |
| RAI1       | -0.03 | 8.20  | -0.31 | 0.76106 |
| SSPN       | 0.04  | 5.43  | 0.31  | 0.76121 |
| DLGAP1-AS2 | 0.04  | 5.79  | 0.31  | 0.76127 |
| PODN       | 0.05  | 5.55  | 0.31  | 0.76136 |
| AC009779.5 | 0.03  | 5.35  | 0.31  | 0.76139 |
| OFD1P17    | -0.03 | 5.25  | -0.31 | 0.76144 |
| PIM1       | -0.04 | 11.69 | -0.31 | 0.76156 |
| HIVEP3     | -0.03 | 8.30  | -0.30 | 0.76159 |
| KIF5C      | -0.04 | 6.11  | -0.30 | 0.76168 |
| LST1       | 0.04  | 12.46 | 0.30  | 0.76178 |
| UBBP4      | 0.06  | 7.49  | 0.30  | 0.76182 |
| DDX21      | 0.03  | 8.93  | 0.30  | 0.76182 |
| CNBD2      | -0.03 | 5.37  | -0.30 | 0.76209 |
| CHRNA10    | 0.04  | 6.09  | 0.30  | 0.76215 |
| MADD       | 0.02  | 10.68 | 0.30  | 0.76228 |
| HIGD1A     | -0.03 | 6.76  | -0.30 | 0.76233 |
| AC138207.8 | 0.03  | 5.27  | 0.30  | 0.76260 |
| RPS26P6    | 0.08  | 6.96  | 0.30  | 0.76289 |
| CRTC3      | 0.03  | 9.77  | 0.30  | 0.76300 |
| AC097523.1 | 0.03  | 5.45  | 0.30  | 0.76310 |
| C1orf116   | -0.04 | 5.37  | -0.30 | 0.76316 |
| MLLT3      | 0.03  | 7.52  | 0.30  | 0.76346 |
| HDAC6      | -0.02 | 9.45  | -0.30 | 0.76347 |
| AIFM2      | 0.03  | 6.53  | 0.30  | 0.76349 |
| PLIN4      | -0.07 | 8.51  | -0.30 | 0.76358 |
| PXN        | -0.03 | 13.05 | -0.30 | 0.76369 |
| LRRC47     | 0.02  | 9.23  | 0.30  | 0.76370 |
| PHF20L1    | -0.04 | 8.84  | -0.30 | 0.76387 |
| DEF8       | -0.03 | 11.20 | -0.30 | 0.76421 |
| CIDEB      | -0.03 | 9.75  | -0.30 | 0.76451 |

|             |       |       |       |         |
|-------------|-------|-------|-------|---------|
| CLEC40      | 0.09  | 5.45  | 0.30  | 0.76469 |
| OGDH        | 0.02  | 11.13 | 0.30  | 0.76472 |
| WDR53       | 0.02  | 6.81  | 0.30  | 0.76484 |
| ZNF251      | -0.03 | 6.91  | -0.30 | 0.76493 |
| RPL10P6     | 0.06  | 8.34  | 0.30  | 0.76513 |
| AC004241.1  | 0.04  | 6.08  | 0.30  | 0.76531 |
| SNRPD2P1    | -0.03 | 5.44  | -0.30 | 0.76545 |
| RAPSN       | 0.04  | 5.27  | 0.30  | 0.76559 |
| NEK6        | -0.03 | 8.23  | -0.30 | 0.76565 |
| KIF9        | -0.03 | 5.51  | -0.30 | 0.76570 |
| EEF1A1P3    | 0.04  | 5.73  | 0.30  | 0.76574 |
| ZFAND1      | -0.03 | 6.74  | -0.30 | 0.76576 |
| TOR3A       | 0.03  | 8.76  | 0.30  | 0.76610 |
| ZDHHC8      | 0.03  | 8.31  | 0.30  | 0.76612 |
| COCH        | -0.04 | 5.51  | -0.30 | 0.76619 |
| PFN1P9      | 0.03  | 5.12  | 0.30  | 0.76622 |
| BX284668.5  | -0.03 | 6.82  | -0.30 | 0.76624 |
| ARL10       | 0.03  | 6.39  | 0.30  | 0.76628 |
| FAM174B     | -0.03 | 5.76  | -0.30 | 0.76659 |
| PGK1P2      | -0.03 | 6.63  | -0.30 | 0.76680 |
| ST3GAL4     | -0.05 | 9.22  | -0.30 | 0.76682 |
| LRP12       | -0.04 | 5.02  | -0.30 | 0.76693 |
| SHMT1       | -0.03 | 7.42  | -0.30 | 0.76698 |
| ATP8B2      | 0.03  | 10.57 | 0.30  | 0.76713 |
| PIBF1       | -0.03 | 6.37  | -0.30 | 0.76732 |
| CARS1       | 0.02  | 10.10 | 0.30  | 0.76737 |
| C12orf66    | 0.02  | 6.24  | 0.30  | 0.76747 |
| PRKACA      | 0.02  | 11.70 | 0.30  | 0.76783 |
| AC005520.4  | -0.04 | 5.32  | -0.30 | 0.76788 |
| CDC42       | -0.02 | 11.82 | -0.30 | 0.76806 |
| SNX33       | 0.03  | 7.53  | 0.30  | 0.76808 |
| AL356481.1  | 0.03  | 4.90  | 0.30  | 0.76819 |
| ING4        | 0.02  | 9.18  | 0.30  | 0.76847 |
| TNS1        | 0.08  | 9.83  | 0.30  | 0.76851 |
| DUS4L       | -0.03 | 5.07  | -0.30 | 0.76853 |
| AC103858.3  | -0.05 | 6.82  | -0.30 | 0.76857 |
| CYP4F35P    | 0.04  | 5.02  | 0.30  | 0.76864 |
| AASS        | 0.04  | 5.18  | 0.30  | 0.76868 |
| AC079228.1  | 0.04  | 5.78  | 0.30  | 0.76899 |
| PUS10       | -0.03 | 5.68  | -0.30 | 0.76915 |
| AL035071.1  | 0.03  | 6.99  | 0.29  | 0.76919 |
| AC245884.12 | -0.05 | 7.21  | -0.29 | 0.76919 |
| EEF1A1P4    | 0.04  | 6.70  | 0.29  | 0.76947 |
| GRK2        | 0.02  | 13.05 | 0.29  | 0.76954 |
| RRAGB       | -0.02 | 6.40  | -0.29 | 0.76956 |
| GMIP        | -0.03 | 12.18 | -0.29 | 0.76957 |
| AC102953.2  | 0.03  | 5.19  | 0.29  | 0.76968 |
| RBMX        | 0.02  | 9.84  | 0.29  | 0.76973 |
| LAMC1       | -0.04 | 6.11  | -0.29 | 0.76974 |
| NAP1L1P1    | -0.04 | 6.64  | -0.29 | 0.76979 |

|             |       |       |       |         |
|-------------|-------|-------|-------|---------|
| AC135279.3  | -0.03 | 5.17  | -0.29 | 0.76980 |
| ZSCAN2      | -0.02 | 7.04  | -0.29 | 0.76984 |
| CNIH4       | -0.03 | 8.20  | -0.29 | 0.76990 |
| TCN2        | -0.05 | 8.13  | -0.29 | 0.77032 |
| AC245100.4  | -0.03 | 5.26  | -0.29 | 0.77038 |
| IRAK1BP1    | -0.03 | 5.15  | -0.29 | 0.77050 |
| DDX28       | 0.02  | 8.53  | 0.29  | 0.77053 |
| NKX3-1      | 0.07  | 5.84  | 0.29  | 0.77081 |
| TRBJ1-5     | 0.03  | 5.71  | 0.29  | 0.77086 |
| LNPK        | 0.02  | 7.63  | 0.29  | 0.77129 |
| PTGS1       | 0.04  | 10.17 | 0.29  | 0.77130 |
| ZNF544      | 0.03  | 7.47  | 0.29  | 0.77140 |
| INSL3       | -0.03 | 6.44  | -0.29 | 0.77149 |
| ARVCF       | -0.04 | 6.56  | -0.29 | 0.77155 |
| MXRA7       | 0.07  | 7.58  | 0.29  | 0.77157 |
| SYNGAP1     | -0.03 | 8.73  | -0.29 | 0.77162 |
| VPS9D1      | -0.05 | 9.35  | -0.29 | 0.77176 |
| SLC43A2     | -0.03 | 12.12 | -0.29 | 0.77187 |
| TRAM1       | -0.02 | 9.42  | -0.29 | 0.77187 |
| HNRNPA1     | 0.02  | 12.19 | 0.29  | 0.77188 |
| ACOT1       | 0.03  | 5.22  | 0.29  | 0.77189 |
| BASP1       | -0.06 | 11.94 | -0.29 | 0.77190 |
| B4GALT2     | 0.04  | 6.05  | 0.29  | 0.77210 |
| AKT3        | -0.02 | 7.91  | -0.29 | 0.77214 |
| RAVER2      | 0.03  | 5.38  | 0.29  | 0.77224 |
| ZBED1       | 0.02  | 10.07 | 0.29  | 0.77236 |
| PLEKHA2     | -0.02 | 9.77  | -0.29 | 0.77239 |
| SEC31B      | -0.05 | 8.39  | -0.29 | 0.77250 |
| CACNA1C-AS1 | 0.03  | 5.30  | 0.29  | 0.77258 |
| EHMT1       | -0.02 | 10.12 | -0.29 | 0.77270 |
| KIF3C       | 0.03  | 7.81  | 0.29  | 0.77293 |
| METAP1D     | 0.03  | 6.34  | 0.29  | 0.77305 |
| CA5B        | -0.03 | 8.11  | -0.29 | 0.77315 |
| FMNL3       | 0.03  | 9.35  | 0.29  | 0.77339 |
| LINC02012   | 0.03  | 5.02  | 0.29  | 0.77340 |
| MSC         | 0.05  | 6.70  | 0.29  | 0.77381 |
| TRPV1       | -0.03 | 6.42  | -0.29 | 0.77385 |
| MTFR1L      | 0.02  | 8.91  | 0.29  | 0.77416 |
| KDM5A       | -0.02 | 10.16 | -0.29 | 0.77417 |
| TBXA2R      | 0.03  | 6.05  | 0.29  | 0.77432 |
| PGAM4       | -0.03 | 5.57  | -0.29 | 0.77435 |
| IRS2        | 0.06  | 9.43  | 0.29  | 0.77450 |
| AP002495.1  | 0.03  | 5.39  | 0.29  | 0.77456 |
| SYNE3       | 0.02  | 9.84  | 0.29  | 0.77472 |
| CEP89       | 0.02  | 7.68  | 0.29  | 0.77473 |
| TMEM38B     | -0.03 | 5.66  | -0.29 | 0.77480 |
| AC025171.4  | -0.03 | 5.46  | -0.29 | 0.77486 |
| TULP3       | -0.02 | 6.70  | -0.29 | 0.77486 |
| ACVR1       | 0.03  | 7.59  | 0.29  | 0.77495 |
| CEP70       | 0.03  | 5.22  | 0.29  | 0.77500 |

|             |       |       |       |         |
|-------------|-------|-------|-------|---------|
| TNNT3       | -0.04 | 6.22  | -0.29 | 0.77510 |
| CTBP1-DT    | 0.02  | 7.57  | 0.29  | 0.77515 |
| PTPRM       | 0.04  | 6.57  | 0.29  | 0.77532 |
| AL590226.2  | -0.05 | 5.89  | -0.29 | 0.77579 |
| ADIPOR1     | -0.06 | 12.81 | -0.29 | 0.77587 |
| TTC5        | -0.02 | 6.93  | -0.29 | 0.77603 |
| PMP22       | 0.04  | 5.07  | 0.29  | 0.77605 |
| FTH1        | 0.04  | 15.51 | 0.29  | 0.77606 |
| FRG1BP      | -0.03 | 6.78  | -0.29 | 0.77608 |
| IGHV1OR15-1 | -0.03 | 4.97  | -0.29 | 0.77608 |
| ITPK1       | -0.03 | 11.61 | -0.29 | 0.77609 |
| RPF1        | 0.02  | 8.52  | 0.29  | 0.77618 |
| DRAXIN      | 0.05  | 6.38  | 0.29  | 0.77657 |
| OSGEPL1     | -0.03 | 5.99  | -0.29 | 0.77662 |
| MRI1        | -0.03 | 8.17  | -0.29 | 0.77674 |
| ATG14       | -0.03 | 7.46  | -0.28 | 0.77685 |
| AC096533.1  | 0.03  | 7.13  | 0.28  | 0.77706 |
| BRD7P2      | 0.03  | 5.91  | 0.28  | 0.77729 |
| RAPGEF6     | 0.03  | 7.31  | 0.28  | 0.77746 |
| ZNF155      | 0.03  | 7.14  | 0.28  | 0.77748 |
| SESN1       | -0.03 | 8.36  | -0.28 | 0.77755 |
| ATP6V1E1    | -0.02 | 10.69 | -0.28 | 0.77780 |
| TCL6        | 0.05  | 5.82  | 0.28  | 0.77782 |
| SMIM30      | 0.03  | 6.29  | 0.28  | 0.77785 |
| LRRC24      | 0.03  | 5.14  | 0.28  | 0.77791 |
| FAM177B     | 0.03  | 5.21  | 0.28  | 0.77793 |
| CYTOR       | 0.04  | 7.91  | 0.28  | 0.77800 |
| AL157871.3  | 0.04  | 5.14  | 0.28  | 0.77827 |
| TMEM88      | 0.05  | 7.08  | 0.28  | 0.77834 |
| CELSR2      | -0.04 | 6.62  | -0.28 | 0.77841 |
| RPS4Y1      | -0.23 | 10.26 | -0.28 | 0.77842 |
| MGAT3       | 0.04  | 6.27  | 0.28  | 0.77844 |
| TRBJ1-6     | -0.04 | 5.42  | -0.28 | 0.77915 |
| MSRB3       | 0.03  | 5.89  | 0.28  | 0.77931 |
| CD8B2       | -0.04 | 5.41  | -0.28 | 0.77974 |
| C1R         | -0.03 | 6.26  | -0.28 | 0.77984 |
| GAPDHP40    | 0.03  | 6.29  | 0.28  | 0.77986 |
| MPC2        | 0.02  | 7.89  | 0.28  | 0.77987 |
| FMO4        | 0.02  | 5.62  | 0.28  | 0.77990 |
| DECR1       | -0.02 | 9.26  | -0.28 | 0.77992 |
| SEPTIN7P6   | -0.04 | 5.46  | -0.28 | 0.78011 |
| EIF3E       | 0.02  | 10.86 | 0.28  | 0.78037 |
| IGLJ3       | 0.06  | 5.69  | 0.28  | 0.78041 |
| TYROBP      | 0.04  | 13.64 | 0.28  | 0.78064 |
| FTH1P3      | 0.02  | 5.83  | 0.28  | 0.78067 |
| TRAV21      | -0.03 | 6.62  | -0.28 | 0.78069 |
| PURB        | -0.02 | 8.51  | -0.28 | 0.78095 |
| PPFIBP1     | -0.03 | 5.06  | -0.28 | 0.78095 |
| AC083899.1  | -0.02 | 5.57  | -0.28 | 0.78099 |
| CNNM2       | 0.02  | 6.92  | 0.28  | 0.78115 |

|            |       |       |       |         |
|------------|-------|-------|-------|---------|
| TP73-AS1   | 0.02  | 7.84  | 0.28  | 0.78133 |
| RNMT       | -0.02 | 8.61  | -0.28 | 0.78138 |
| TLN1       | -0.03 | 14.51 | -0.28 | 0.78139 |
| PEX11A     | 0.03  | 5.48  | 0.28  | 0.78170 |
| DNTTIP2    | -0.02 | 9.05  | -0.28 | 0.78183 |
| LLCFC1     | 0.05  | 5.17  | 0.28  | 0.78189 |
| ZNF510     | -0.02 | 6.78  | -0.28 | 0.78203 |
| FOXM1      | -0.03 | 5.60  | -0.28 | 0.78203 |
| CD2BP2-DT  | 0.03  | 5.72  | 0.28  | 0.78244 |
| LINC01588  | -0.03 | 7.01  | -0.28 | 0.78247 |
| TDRKH-AS1  | -0.03 | 4.99  | -0.28 | 0.78253 |
| AC104390.1 | 0.03  | 5.25  | 0.28  | 0.78261 |
| LINC02446  | 0.05  | 6.39  | 0.28  | 0.78285 |
| XRCC6P2    | 0.03  | 7.13  | 0.28  | 0.78309 |
| TULP4      | -0.02 | 7.56  | -0.28 | 0.78337 |
| GDI2P2     | -0.04 | 5.69  | -0.28 | 0.78342 |
| AC020659.1 | 0.05  | 7.02  | 0.28  | 0.78360 |
| YWHAEP5    | -0.03 | 5.46  | -0.28 | 0.78363 |
| ACAD10     | -0.02 | 8.62  | -0.28 | 0.78372 |
| POLG       | 0.01  | 10.62 | 0.28  | 0.78402 |
| PRKAR2B    | -0.04 | 7.91  | -0.28 | 0.78406 |
| ACTBP9     | -0.03 | 6.33  | -0.28 | 0.78414 |
| MTCH1      | 0.02  | 11.13 | 0.28  | 0.78416 |
| PTK7       | -0.03 | 5.93  | -0.28 | 0.78424 |
| TRAV5      | -0.03 | 5.64  | -0.28 | 0.78424 |
| PPP1R15A   | -0.04 | 10.72 | -0.28 | 0.78428 |
| ADPRM      | -0.03 | 6.91  | -0.28 | 0.78429 |
| ARHGAP5    | 0.03  | 6.71  | 0.28  | 0.78441 |
| KATNA1     | 0.02  | 7.80  | 0.27  | 0.78455 |
| AC022182.3 | -0.03 | 5.61  | -0.27 | 0.78462 |
| ACTG1P14   | 0.04  | 7.27  | 0.27  | 0.78467 |
| SCMH1      | 0.03  | 7.43  | 0.27  | 0.78470 |
| TBL1X      | -0.02 | 10.91 | -0.27 | 0.78476 |
| ERH        | -0.02 | 9.04  | -0.27 | 0.78496 |
| ZNF839     | 0.02  | 8.44  | 0.27  | 0.78517 |
| SMIM10L1   | -0.02 | 7.86  | -0.27 | 0.78519 |
| PKMP1      | 0.04  | 6.77  | 0.27  | 0.78532 |
| TMEM169    | -0.03 | 5.48  | -0.27 | 0.78534 |
| FOXN3-AS1  | -0.03 | 5.61  | -0.27 | 0.78559 |
| SUFU       | -0.02 | 9.14  | -0.27 | 0.78579 |
| SULT1A1    | 0.05  | 10.38 | 0.27  | 0.78583 |
| HSP90B1    | -0.02 | 11.22 | -0.27 | 0.78605 |
| METRNL     | 0.04  | 9.76  | 0.27  | 0.78616 |
| AC040977.1 | 0.03  | 6.31  | 0.27  | 0.78624 |
| TAF1A      | 0.03  | 5.36  | 0.27  | 0.78627 |
| PSMA6      | -0.02 | 6.04  | -0.27 | 0.78637 |
| ACER1      | -0.03 | 4.98  | -0.27 | 0.78657 |
| PRPF8      | -0.02 | 12.19 | -0.27 | 0.78664 |
| LIPT1      | 0.03  | 5.89  | 0.27  | 0.78666 |
| ARL16      | 0.03  | 8.10  | 0.27  | 0.78668 |



|            |       |       |       |         |
|------------|-------|-------|-------|---------|
| LMBR1L     | 0.02  | 9.95  | 0.27  | 0.78668 |
| INPP4B     | -0.03 | 7.62  | -0.27 | 0.78674 |
| AL133477.1 | -0.03 | 5.78  | -0.27 | 0.78685 |
| NDUFB9P2   | 0.04  | 5.25  | 0.27  | 0.78714 |
| VIT        | -0.04 | 5.02  | -0.27 | 0.78717 |
| CALM1      | 0.02  | 12.30 | 0.27  | 0.78720 |
| ARRB2      | -0.03 | 13.98 | -0.27 | 0.78722 |
| SOCS3      | -0.06 | 9.00  | -0.27 | 0.78737 |
| HSP90AA4P  | 0.03  | 5.04  | 0.27  | 0.78744 |
| AC004987.2 | -0.03 | 6.00  | -0.27 | 0.78757 |
| GLOD4      | -0.02 | 9.29  | -0.27 | 0.78800 |
| FPR1       | -0.05 | 13.83 | -0.27 | 0.78811 |
| FOLR3      | -0.08 | 9.37  | -0.27 | 0.78821 |
| CEACAM19   | -0.04 | 5.70  | -0.27 | 0.78836 |
| GNG5P2     | 0.04  | 5.85  | 0.27  | 0.78867 |
| HLX        | 0.04  | 8.68  | 0.27  | 0.78871 |
| TARS3      | -0.02 | 6.93  | -0.27 | 0.78876 |
| UCK2       | 0.02  | 7.15  | 0.27  | 0.78887 |
| CES4A      | -0.03 | 6.49  | -0.27 | 0.78892 |
| PYURF      | 0.02  | 8.20  | 0.27  | 0.78895 |
| LSM11      | -0.02 | 5.97  | -0.27 | 0.78896 |
| SEC22C     | -0.02 | 8.17  | -0.27 | 0.78914 |
| ABRAXAS1   | -0.02 | 6.94  | -0.27 | 0.78914 |
| GDI1       | 0.02  | 11.77 | 0.27  | 0.78918 |
| TRAK2      | -0.04 | 8.72  | -0.27 | 0.78928 |
| MKRN1      | 0.05  | 12.03 | 0.27  | 0.78961 |
| UGP2       | -0.02 | 9.70  | -0.27 | 0.78979 |
| PPP1R10    | -0.02 | 10.58 | -0.27 | 0.78980 |
| PSMB2      | 0.02  | 9.57  | 0.27  | 0.78991 |
| RDX        | 0.03  | 6.91  | 0.27  | 0.79011 |
| SEMA3G     | -0.03 | 4.94  | -0.27 | 0.79031 |
| MYO1A      | -0.03 | 5.04  | -0.27 | 0.79035 |
| SDHAP3     | -0.03 | 7.09  | -0.27 | 0.79071 |
| DERL2      | 0.02  | 8.88  | 0.27  | 0.79086 |
| GGA2       | -0.02 | 10.35 | -0.27 | 0.79120 |
| BRMS1L     | -0.03 | 5.35  | -0.27 | 0.79131 |
| THOC5      | 0.02  | 10.22 | 0.27  | 0.79132 |
| HNRNPAB    | 0.02  | 9.88  | 0.27  | 0.79137 |
| CPQ        | -0.03 | 9.49  | -0.27 | 0.79137 |
| TBCE       | 0.02  | 7.33  | 0.27  | 0.79153 |
| TMEM91     | 0.04  | 9.00  | 0.27  | 0.79158 |
| CAPN12     | 0.03  | 6.92  | 0.27  | 0.79164 |
| AC004067.1 | 0.03  | 5.13  | 0.27  | 0.79171 |
| CCL4       | -0.04 | 8.35  | -0.27 | 0.79171 |
| OMA1       | -0.02 | 6.91  | -0.27 | 0.79187 |
| EIF5AP4    | 0.03  | 5.80  | 0.27  | 0.79205 |
| LRRC37A2   | -0.04 | 6.87  | -0.26 | 0.79208 |
| AC025279.1 | -0.03 | 5.05  | -0.26 | 0.79215 |
| EIF2AK1    | 0.03  | 11.12 | 0.26  | 0.79217 |
| SLC17A9    | 0.04  | 7.36  | 0.26  | 0.79241 |

|            |       |       |       |         |
|------------|-------|-------|-------|---------|
| PFAS       | -0.02 | 7.75  | -0.26 | 0.79270 |
| RGP1       | -0.02 | 8.83  | -0.26 | 0.79270 |
| AC087741.1 | -0.05 | 8.10  | -0.26 | 0.79275 |
| RPSAP3     | 0.03  | 5.49  | 0.26  | 0.79282 |
| BCKDHB     | -0.02 | 6.21  | -0.26 | 0.79284 |
| GLRX2      | 0.03  | 6.08  | 0.26  | 0.79285 |
| AP006296.1 | 0.03  | 5.71  | 0.26  | 0.79308 |
| LINC02422  | 0.03  | 5.98  | 0.26  | 0.79313 |
| EIF4H      | -0.01 | 11.27 | -0.26 | 0.79317 |
| CLUHP3     | -0.04 | 7.93  | -0.26 | 0.79346 |
| MCM3AP     | 0.01  | 10.54 | 0.26  | 0.79352 |
| RBM15      | -0.02 | 7.78  | -0.26 | 0.79359 |
| SLC25A20   | -0.02 | 9.25  | -0.26 | 0.79368 |
| ERCC8      | -0.03 | 5.66  | -0.26 | 0.79396 |
| SCCPDH     | -0.03 | 7.42  | -0.26 | 0.79402 |
| AC104297.1 | 0.03  | 4.92  | 0.26  | 0.79408 |
| ZNF451     | -0.02 | 7.51  | -0.26 | 0.79411 |
| NPM1P25    | -0.03 | 5.07  | -0.26 | 0.79418 |
| AC010326.1 | -0.03 | 6.07  | -0.26 | 0.79425 |
| GGT5       | 0.04  | 5.24  | 0.26  | 0.79427 |
| UGGT1      | 0.02  | 10.05 | 0.26  | 0.79441 |
| ACTG1P17   | -0.03 | 5.29  | -0.26 | 0.79447 |
| CFAP20     | 0.02  | 8.05  | 0.26  | 0.79459 |
| AP003498.1 | -0.03 | 4.92  | -0.26 | 0.79485 |
| ZNF438     | -0.04 | 8.44  | -0.26 | 0.79533 |
| SLC45A3    | -0.04 | 6.88  | -0.26 | 0.79541 |
| EEF1A1P11  | 0.04  | 9.31  | 0.26  | 0.79570 |
| GUSBP11    | -0.05 | 7.36  | -0.26 | 0.79576 |
| RIOX2      | -0.02 | 7.49  | -0.26 | 0.79586 |
| TRIOBP     | 0.02  | 10.42 | 0.26  | 0.79586 |
| AP003071.5 | 0.03  | 5.11  | 0.26  | 0.79608 |
| OLFM4      | -0.10 | 6.04  | -0.26 | 0.79613 |
| PTK2       | -0.03 | 6.80  | -0.26 | 0.79613 |
| NPM1P6     | -0.03 | 5.65  | -0.26 | 0.79662 |
| NUTM2B-AS1 | -0.03 | 7.20  | -0.26 | 0.79670 |
| CD300LB    | 0.03  | 9.61  | 0.26  | 0.79684 |
| C2orf92    | 0.03  | 5.24  | 0.26  | 0.79714 |
| ZNF501     | -0.03 | 5.37  | -0.26 | 0.79736 |
| AK9        | 0.02  | 5.81  | 0.26  | 0.79738 |
| PGGHG      | -0.05 | 12.58 | -0.26 | 0.79745 |
| SCARF2     | 0.03  | 5.24  | 0.26  | 0.79755 |
| ETFDH      | -0.02 | 7.37  | -0.26 | 0.79767 |
| RAB8A      | 0.02  | 11.29 | 0.26  | 0.79770 |
| RTTN       | 0.02  | 6.65  | 0.26  | 0.79802 |
| TADA2A     | -0.02 | 7.23  | -0.26 | 0.79812 |
| TRIM10     | -0.06 | 6.58  | -0.26 | 0.79829 |
| ATP23      | -0.03 | 6.00  | -0.26 | 0.79835 |
| LXN        | -0.02 | 6.35  | -0.26 | 0.79839 |
| SUPV3L1    | 0.02  | 7.83  | 0.26  | 0.79843 |
| NCF1C      | 0.04  | 11.71 | 0.26  | 0.79844 |

|            |       |       |       |         |
|------------|-------|-------|-------|---------|
| PDCD4-AS1  | 0.02  | 7.20  | 0.26  | 0.79851 |
| NOP9       | -0.02 | 9.03  | -0.26 | 0.79881 |
| SEPHS1     | -0.02 | 8.29  | -0.26 | 0.79898 |
| SWT1       | 0.02  | 6.33  | 0.26  | 0.79901 |
| DNAJC14    | 0.02  | 8.11  | 0.26  | 0.79908 |
| TRBV6-2    | 0.05  | 6.89  | 0.26  | 0.79918 |
| GCC2       | -0.03 | 8.50  | -0.26 | 0.79923 |
| AC021231.2 | 0.03  | 5.78  | 0.26  | 0.79923 |
| CD83       | 0.02  | 7.39  | 0.26  | 0.79933 |
| LINC00910  | 0.03  | 6.50  | 0.26  | 0.79936 |
| ACSS3      | 0.04  | 6.21  | 0.26  | 0.79940 |
| VDAC3      | 0.02  | 9.56  | 0.26  | 0.79968 |
| TMEM116    | 0.02  | 7.04  | 0.25  | 0.79977 |
| MYO15B     | -0.05 | 10.88 | -0.25 | 0.79990 |
| BFSP1      | -0.04 | 5.68  | -0.25 | 0.79995 |
| YWHABP2    | -0.04 | 5.80  | -0.25 | 0.80000 |
| C10orf143  | -0.03 | 6.43  | -0.25 | 0.80000 |
| TOMM40L    | -0.02 | 7.79  | -0.25 | 0.80016 |
| PGAM5      | -0.02 | 8.02  | -0.25 | 0.80018 |
| AC087500.1 | -0.03 | 5.51  | -0.25 | 0.80018 |
| ADGRA2     | -0.03 | 6.34  | -0.25 | 0.80020 |
| SNRNP70    | 0.03  | 11.73 | 0.25  | 0.80030 |
| MMRN1      | -0.04 | 5.45  | -0.25 | 0.80033 |
| AC104619.3 | -0.03 | 6.40  | -0.25 | 0.80048 |
| MPV17      | 0.02  | 8.64  | 0.25  | 0.80053 |
| NUTM2B     | 0.03  | 5.08  | 0.25  | 0.80068 |
| CATSPER2   | 0.03  | 5.60  | 0.25  | 0.80070 |
| TNFRSF10A  | 0.02  | 7.37  | 0.25  | 0.80070 |
| PI3        | -0.08 | 9.33  | -0.25 | 0.80075 |
| CCNC       | -0.02 | 7.11  | -0.25 | 0.80080 |
| DHX34      | -0.03 | 10.68 | -0.25 | 0.80108 |
| MYOM2      | 0.10  | 7.91  | 0.25  | 0.80121 |
| CALU       | -0.02 | 7.67  | -0.25 | 0.80143 |
| FAM20C     | 0.04  | 7.98  | 0.25  | 0.80160 |
| KIFC1      | 0.03  | 5.83  | 0.25  | 0.80167 |
| HCLS1      | 0.03  | 13.74 | 0.25  | 0.80171 |
| ZNNT1      | 0.03  | 6.48  | 0.25  | 0.80192 |
| AC105749.1 | -0.02 | 5.76  | -0.25 | 0.80220 |
| CYP2E1     | 0.03  | 5.18  | 0.25  | 0.80241 |
| SUZ12P1    | -0.02 | 6.10  | -0.25 | 0.80247 |
| CLDN9      | 0.04  | 6.78  | 0.25  | 0.80263 |
| ABLIM1     | 0.03  | 10.02 | 0.25  | 0.80266 |
| MARCO      | -0.05 | 7.76  | -0.25 | 0.80270 |
| AC048382.6 | 0.03  | 5.99  | 0.25  | 0.80280 |
| SAP30      | -0.03 | 6.57  | -0.25 | 0.80290 |
| FITM2      | 0.03  | 6.36  | 0.25  | 0.80296 |
| IGKV2-30   | 0.06  | 6.30  | 0.25  | 0.80298 |
| POLA2      | 0.03  | 6.52  | 0.25  | 0.80298 |
| SIN3B      | 0.02  | 10.12 | 0.25  | 0.80317 |
| KLF8       | -0.03 | 5.81  | -0.25 | 0.80329 |

|            |       |       |       |         |
|------------|-------|-------|-------|---------|
| TEPSIN     | 0.03  | 9.93  | 0.25  | 0.80350 |
| H2AZ2P1    | 0.03  | 5.95  | 0.25  | 0.80356 |
| POMC       | 0.03  | 5.52  | 0.25  | 0.80368 |
| TLK1       | -0.02 | 8.53  | -0.25 | 0.80378 |
| ROBO3      | -0.03 | 6.71  | -0.25 | 0.80389 |
| S100A11    | 0.04  | 13.80 | 0.25  | 0.80391 |
| AL008729.1 | -0.03 | 5.46  | -0.25 | 0.80417 |
| MRRF       | 0.02  | 7.50  | 0.25  | 0.80429 |
| PSME2P6    | 0.03  | 5.18  | 0.25  | 0.80430 |
| YTHDF2     | -0.01 | 9.25  | -0.25 | 0.80431 |
| SPNS2      | -0.03 | 5.99  | -0.25 | 0.80432 |
| C7orf31    | -0.02 | 6.70  | -0.25 | 0.80446 |
| AC007383.2 | -0.03 | 5.73  | -0.25 | 0.80487 |
| RTF2       | 0.02  | 11.12 | 0.25  | 0.80497 |
| AC007342.5 | 0.03  | 6.01  | 0.25  | 0.80502 |
| PLD6       | -0.03 | 6.51  | -0.25 | 0.80514 |
| TERF2IP    | 0.02  | 10.05 | 0.25  | 0.80516 |
| CCND2      | -0.02 | 10.31 | -0.25 | 0.80520 |
| UCP3       | -0.02 | 6.08  | -0.25 | 0.80544 |
| AC007342.4 | 0.04  | 5.37  | 0.25  | 0.80548 |
| HINT1P1    | 0.03  | 5.46  | 0.25  | 0.80556 |
| RPS24P6    | 0.02  | 5.04  | 0.25  | 0.80572 |
| NP1PB12    | -0.03 | 7.92  | -0.25 | 0.80584 |
| PDIA3      | -0.02 | 11.08 | -0.25 | 0.80588 |
| ZSCAN26    | -0.02 | 7.24  | -0.25 | 0.80595 |
| TNFRSF8    | 0.03  | 8.40  | 0.25  | 0.80599 |
| PCCB       | 0.02  | 7.68  | 0.25  | 0.80612 |
| ELANE      | 0.08  | 7.05  | 0.25  | 0.80614 |
| UPB1       | -0.02 | 5.60  | -0.25 | 0.80616 |
| CENPC      | -0.02 | 7.07  | -0.25 | 0.80631 |
| KANSL2     | -0.01 | 8.16  | -0.25 | 0.80643 |
| ANP32A     | -0.02 | 11.51 | -0.25 | 0.80675 |
| FANCE      | -0.02 | 6.83  | -0.25 | 0.80694 |
| PDHA1      | -0.01 | 8.98  | -0.25 | 0.80698 |
| LINC01003  | 0.02  | 6.48  | 0.25  | 0.80698 |
| GTF2IP13   | -0.03 | 6.22  | -0.25 | 0.80702 |
| MTND1P23   | -0.04 | 9.62  | -0.25 | 0.80725 |
| AP000944.5 | -0.03 | 5.03  | -0.25 | 0.80735 |
| SP2        | 0.02  | 9.66  | 0.25  | 0.80741 |
| CLEC4G     | 0.03  | 5.72  | 0.24  | 0.80750 |
| L3MBTL1    | 0.03  | 6.19  | 0.24  | 0.80754 |
| ING2       | -0.02 | 6.89  | -0.24 | 0.80760 |
| CEP126     | 0.03  | 5.69  | 0.24  | 0.80762 |
| RPS24P17   | 0.03  | 5.79  | 0.24  | 0.80793 |
| LIPC       | 0.03  | 5.63  | 0.24  | 0.80815 |
| PCNT       | -0.02 | 9.19  | -0.24 | 0.80822 |
| NBAS       | 0.02  | 8.96  | 0.24  | 0.80826 |
| WASH3P     | 0.04  | 7.93  | 0.24  | 0.80836 |
| ATP6V0E1P2 | -0.02 | 5.05  | -0.24 | 0.80868 |
| CNKS2R2    | 0.03  | 5.28  | 0.24  | 0.80871 |

|            |       |       |       |         |
|------------|-------|-------|-------|---------|
| TMEM254    | -0.02 | 7.51  | -0.24 | 0.80873 |
| PLEKHA7    | -0.03 | 5.56  | -0.24 | 0.80873 |
| LINC01237  | -0.03 | 4.92  | -0.24 | 0.80882 |
| STAG3L3    | 0.03  | 6.17  | 0.24  | 0.80883 |
| CCT6A      | -0.02 | 9.69  | -0.24 | 0.80895 |
| APOL3      | 0.02  | 10.70 | 0.24  | 0.80895 |
| CRK        | -0.03 | 9.11  | -0.24 | 0.80902 |
| DDR1       | 0.03  | 6.68  | 0.24  | 0.80906 |
| POLR2M     | 0.03  | 7.15  | 0.24  | 0.80907 |
| C18orf32   | 0.02  | 6.50  | 0.24  | 0.80920 |
| BRAP       | -0.02 | 8.33  | -0.24 | 0.80942 |
| PLXNB1     | -0.03 | 5.61  | -0.24 | 0.80949 |
| IP6K2      | -0.01 | 9.72  | -0.24 | 0.80969 |
| REELD1     | 0.03  | 5.21  | 0.24  | 0.80970 |
| ABHD16A    | 0.03  | 6.37  | 0.24  | 0.80982 |
| GPR18      | 0.02  | 7.67  | 0.24  | 0.81004 |
| MAMDC4     | -0.03 | 6.28  | -0.24 | 0.81015 |
| ATP5F1AP2  | -0.02 | 5.42  | -0.24 | 0.81024 |
| NAA35      | -0.02 | 6.88  | -0.24 | 0.81042 |
| BTG1       | 0.02  | 12.70 | 0.24  | 0.81043 |
| LMBRD1     | -0.02 | 8.94  | -0.24 | 0.81048 |
| LRTOMT     | 0.03  | 5.09  | 0.24  | 0.81048 |
| MADCAM1    | -0.03 | 5.04  | -0.24 | 0.81057 |
| AC020916.1 | -0.04 | 9.08  | -0.24 | 0.81064 |
| CMPK1      | 0.02  | 9.21  | 0.24  | 0.81068 |
| BCL9       | -0.03 | 7.46  | -0.24 | 0.81073 |
| TMIGD3     | -0.04 | 5.00  | -0.24 | 0.81079 |
| CNN2P9     | 0.03  | 6.51  | 0.24  | 0.81081 |
| BPNT1      | -0.03 | 6.71  | -0.24 | 0.81085 |
| MELTF      | -0.02 | 5.05  | -0.24 | 0.81087 |
| UBE3A      | 0.03  | 8.56  | 0.24  | 0.81095 |
| AC009133.3 | 0.03  | 6.36  | 0.24  | 0.81130 |
| MRPL32     | 0.01  | 7.88  | 0.24  | 0.81130 |
| TMBIM6     | -0.02 | 13.20 | -0.24 | 0.81132 |
| BEND2      | -0.04 | 5.88  | -0.24 | 0.81135 |
| CS         | 0.01  | 10.49 | 0.24  | 0.81143 |
| SPATA5     | -0.02 | 5.86  | -0.24 | 0.81150 |
| VSIG10     | 0.04  | 5.71  | 0.24  | 0.81159 |
| AC139887.2 | -0.03 | 6.64  | -0.24 | 0.81187 |
| MAP1LC3B2  | -0.03 | 6.56  | -0.24 | 0.81192 |
| TCTN2      | -0.02 | 6.02  | -0.24 | 0.81201 |
| PPP2R5B    | 0.03  | 8.73  | 0.24  | 0.81220 |
| SLC25A33   | 0.02  | 6.06  | 0.24  | 0.81229 |
| SPON1      | 0.03  | 5.07  | 0.24  | 0.81236 |
| RDH13      | 0.02  | 6.61  | 0.24  | 0.81254 |
| PEAK3      | -0.04 | 8.76  | -0.24 | 0.81259 |
| NCKAP5L    | 0.03  | 8.63  | 0.24  | 0.81271 |
| PTGDR2     | -0.04 | 8.04  | -0.24 | 0.81279 |
| AFF3       | 0.04  | 7.24  | 0.24  | 0.81282 |
| ACAA1      | 0.02  | 10.94 | 0.24  | 0.81285 |

|             |       |       |       |         |
|-------------|-------|-------|-------|---------|
| FBXW7       | 0.02  | 8.16  | 0.24  | 0.81298 |
| AC005229.4  | -0.02 | 5.40  | -0.24 | 0.81324 |
| CDH24       | -0.03 | 5.26  | -0.24 | 0.81332 |
| LRWD1       | -0.03 | 8.90  | -0.24 | 0.81352 |
| AC097468.3  | -0.02 | 5.31  | -0.24 | 0.81369 |
| PIF1        | -0.03 | 5.70  | -0.24 | 0.81373 |
| FTH1P2      | -0.04 | 9.63  | -0.24 | 0.81374 |
| PSME1       | 0.02  | 12.52 | 0.24  | 0.81383 |
| TAF5        | -0.02 | 6.09  | -0.24 | 0.81392 |
| CDK13       | -0.02 | 9.40  | -0.24 | 0.81412 |
| AP2B1       | 0.01  | 11.18 | 0.24  | 0.81414 |
| AC009237.14 | 0.03  | 4.98  | 0.24  | 0.81416 |
| SNHG26      | -0.03 | 5.24  | -0.24 | 0.81420 |
| RNF227      | 0.02  | 5.57  | 0.24  | 0.81427 |
| AP3M2       | 0.02  | 7.36  | 0.24  | 0.81437 |
| PDGFB       | 0.03  | 6.90  | 0.24  | 0.81448 |
| AC010422.8  | -0.03 | 6.00  | -0.24 | 0.81453 |
| EIF3C       | 0.03  | 8.31  | 0.24  | 0.81462 |
| MBD5        | -0.02 | 7.51  | -0.24 | 0.81468 |
| INPP5E      | 0.02  | 8.04  | 0.24  | 0.81488 |
| LDHAP5      | -0.03 | 5.46  | -0.23 | 0.81515 |
| HNRNPRP1    | 0.03  | 5.23  | 0.23  | 0.81520 |
| IMPDH1      | 0.03  | 12.40 | 0.23  | 0.81524 |
| KIF9-AS1    | -0.02 | 5.58  | -0.23 | 0.81530 |
| AL121845.1  | -0.03 | 5.06  | -0.23 | 0.81541 |
| RPS6KA5     | 0.03  | 8.40  | 0.23  | 0.81543 |
| TTC3P1      | -0.03 | 5.71  | -0.23 | 0.81568 |
| CFAP44      | 0.03  | 5.87  | 0.23  | 0.81580 |
| JPT2        | 0.02  | 8.40  | 0.23  | 0.81588 |
| VPS26B      | 0.01  | 10.24 | 0.23  | 0.81588 |
| PITPNM2     | 0.02  | 8.77  | 0.23  | 0.81593 |
| NIFK-AS1    | 0.02  | 6.33  | 0.23  | 0.81596 |
| TMX2P1      | -0.02 | 5.14  | -0.23 | 0.81600 |
| PLXNA3      | -0.03 | 8.66  | -0.23 | 0.81606 |
| SGCB        | 0.02  | 5.65  | 0.23  | 0.81613 |
| IGHV6-1     | 0.05  | 6.38  | 0.23  | 0.81613 |
| AL356534.1  | 0.03  | 5.68  | 0.23  | 0.81618 |
| NIBAN2      | 0.03  | 9.42  | 0.23  | 0.81651 |
| ATXN7L3     | 0.01  | 10.56 | 0.23  | 0.81660 |
| SEZ6L       | -0.03 | 5.92  | -0.23 | 0.81662 |
| IGHV2-26    | -0.05 | 5.61  | -0.23 | 0.81690 |
| TTC27       | 0.02  | 7.39  | 0.23  | 0.81697 |
| TYMS        | -0.04 | 6.02  | -0.23 | 0.81710 |
| ZNF790      | 0.02  | 5.59  | 0.23  | 0.81719 |
| ARID3A      | 0.03  | 9.71  | 0.23  | 0.81724 |
| UTP3        | -0.02 | 8.77  | -0.23 | 0.81747 |
| AC147651.1  | -0.04 | 6.54  | -0.23 | 0.81768 |
| CYP4V2      | 0.02  | 6.88  | 0.23  | 0.81769 |
| RIOK1       | 0.02  | 7.78  | 0.23  | 0.81773 |
| MB21D2      | 0.03  | 5.72  | 0.23  | 0.81774 |

|            |       |       |       |         |
|------------|-------|-------|-------|---------|
| NEK1       | -0.02 | 6.29  | -0.23 | 0.81783 |
| SASS6      | -0.02 | 5.22  | -0.23 | 0.81786 |
| AC060766.4 | 0.03  | 5.66  | 0.23  | 0.81795 |
| PCGF6      | 0.02  | 5.57  | 0.23  | 0.81800 |
| ARSK       | 0.02  | 5.57  | 0.23  | 0.81803 |
| TCHP       | -0.02 | 8.27  | -0.23 | 0.81806 |
| TBC1D2     | 0.02  | 9.18  | 0.23  | 0.81821 |
| PIGBOS1    | 0.03  | 7.69  | 0.23  | 0.81854 |
| AC115837.1 | 0.03  | 8.60  | 0.23  | 0.81858 |
| MRPL58     | 0.02  | 8.03  | 0.23  | 0.81862 |
| ZNF266     | 0.02  | 9.15  | 0.23  | 0.81864 |
| HELLS      | 0.03  | 5.80  | 0.23  | 0.81876 |
| RASA4      | -0.02 | 5.71  | -0.23 | 0.81878 |
| KARS1P1    | 0.03  | 5.48  | 0.23  | 0.81881 |
| VWA5A      | 0.02  | 7.10  | 0.23  | 0.81883 |
| RNASEH1    | -0.02 | 7.60  | -0.23 | 0.81888 |
| FAM221A    | -0.03 | 5.20  | -0.23 | 0.81904 |
| MYRF       | -0.03 | 5.61  | -0.23 | 0.81904 |
| SLC12A3    | 0.03  | 4.97  | 0.23  | 0.81905 |
| TSPAN13    | 0.03  | 6.60  | 0.23  | 0.81906 |
| EIF2AK3-DT | 0.03  | 5.22  | 0.23  | 0.81922 |
| LINC00649  | -0.03 | 8.20  | -0.23 | 0.81938 |
| ZBTB11-AS1 | -0.03 | 6.05  | -0.23 | 0.81939 |
| SYNGR3     | -0.03 | 5.17  | -0.23 | 0.81956 |
| SMS        | 0.02  | 8.92  | 0.23  | 0.81961 |
| WFDC21P    | 0.04  | 5.23  | 0.23  | 0.81975 |
| ALDH9A1    | -0.01 | 9.18  | -0.23 | 0.81994 |
| RPL10AP1   | -0.02 | 5.01  | -0.23 | 0.82006 |
| CHST2      | -0.03 | 9.44  | -0.23 | 0.82027 |
| GHRL       | 0.03  | 7.17  | 0.23  | 0.82057 |
| CCDC91     | -0.02 | 7.65  | -0.23 | 0.82070 |
| HLA-V      | -0.06 | 5.22  | -0.23 | 0.82097 |
| TTC28      | 0.03  | 5.66  | 0.23  | 0.82104 |
| MICAL3     | -0.04 | 6.64  | -0.23 | 0.82121 |
| ZBTB12     | 0.03  | 5.04  | 0.23  | 0.82121 |
| SGSM1      | 0.03  | 5.85  | 0.23  | 0.82123 |
| MS4A1      | -0.05 | 9.32  | -0.23 | 0.82128 |
| CDA        | -0.04 | 11.29 | -0.23 | 0.82144 |
| AC108925.1 | 0.03  | 5.29  | 0.23  | 0.82151 |
| RCAN3      | 0.03  | 9.72  | 0.23  | 0.82155 |
| UST        | 0.02  | 6.19  | 0.23  | 0.82187 |
| NETO2      | 0.02  | 6.16  | 0.23  | 0.82187 |
| MAPT       | 0.03  | 5.21  | 0.23  | 0.82188 |
| OLFM1      | -0.06 | 6.32  | -0.23 | 0.82190 |
| TNRC6C-AS1 | 0.02  | 9.90  | 0.23  | 0.82212 |
| SAFB       | 0.01  | 10.61 | 0.23  | 0.82216 |
| AC009948.3 | 0.02  | 5.10  | 0.23  | 0.82218 |
| TMEM234    | 0.02  | 7.90  | 0.23  | 0.82228 |
| MSTO2P     | 0.03  | 5.77  | 0.23  | 0.82230 |
| MIR762HG   | 0.02  | 5.83  | 0.23  | 0.82264 |

|            |       |       |       |         |
|------------|-------|-------|-------|---------|
| NOC2LP1    | 0.03  | 5.19  | 0.23  | 0.82265 |
| SH2D1A     | 0.03  | 8.08  | 0.23  | 0.82265 |
| EPB41L4A   | 0.03  | 5.46  | 0.23  | 0.82268 |
| ZNF565     | 0.02  | 5.70  | 0.23  | 0.82274 |
| CDCA5      | 0.02  | 5.76  | 0.23  | 0.82276 |
| AC108673.2 | -0.02 | 5.37  | -0.22 | 0.82287 |
| MT-ND1     | 0.02  | 14.67 | 0.22  | 0.82303 |
| PRDX1P1    | -0.03 | 5.53  | -0.22 | 0.82309 |
| LRIG1      | -0.03 | 8.21  | -0.22 | 0.82327 |
| HMG2P4     | -0.02 | 5.38  | -0.22 | 0.82333 |
| FBXL12     | 0.02  | 7.91  | 0.22  | 0.82333 |
| HNRNPCP3   | 0.02  | 5.26  | 0.22  | 0.82341 |
| PGM1       | 0.02  | 9.05  | 0.22  | 0.82364 |
| EID2       | -0.02 | 6.99  | -0.22 | 0.82365 |
| COL9A3     | 0.04  | 6.27  | 0.22  | 0.82375 |
| PCDH1      | -0.04 | 6.75  | -0.22 | 0.82377 |
| PSMD14     | -0.02 | 7.51  | -0.22 | 0.82387 |
| MTX1P1     | 0.03  | 5.28  | 0.22  | 0.82404 |
| AL592295.4 | -0.02 | 5.51  | -0.22 | 0.82416 |
| AC244090.1 | 0.02  | 5.58  | 0.22  | 0.82431 |
| AC007342.3 | -0.03 | 7.53  | -0.22 | 0.82442 |
| AC099063.4 | 0.02  | 5.39  | 0.22  | 0.82446 |
| PRKCA      | -0.03 | 8.29  | -0.22 | 0.82446 |
| AL596202.1 | -0.03 | 4.93  | -0.22 | 0.82449 |
| ACADVL     | 0.02  | 11.60 | 0.22  | 0.82465 |
| PPM1M      | 0.02  | 10.92 | 0.22  | 0.82467 |
| AC244213.1 | 0.04  | 4.85  | 0.22  | 0.82482 |
| ATG4A      | -0.02 | 7.00  | -0.22 | 0.82485 |
| LYPLAL1    | -0.03 | 6.54  | -0.22 | 0.82489 |
| SH3BP5     | -0.02 | 9.94  | -0.22 | 0.82489 |
| AP003068.2 | 0.04  | 7.48  | 0.22  | 0.82498 |
| USP12      | -0.03 | 7.88  | -0.22 | 0.82501 |
| LILRB3     | 0.04  | 12.71 | 0.22  | 0.82501 |
| CFL1P5     | -0.02 | 5.86  | -0.22 | 0.82511 |
| SIGLEC7    | -0.03 | 9.68  | -0.22 | 0.82528 |
| CHML       | -0.02 | 5.75  | -0.22 | 0.82528 |
| TRBJ1-4    | -0.03 | 5.28  | -0.22 | 0.82531 |
| GPALPP1    | 0.02  | 6.59  | 0.22  | 0.82531 |
| NPIPA1     | 0.03  | 6.85  | 0.22  | 0.82539 |
| TMEM14C    | -0.02 | 8.22  | -0.22 | 0.82540 |
| RNF130     | -0.02 | 11.43 | -0.22 | 0.82548 |
| ZNF433-AS1 | -0.02 | 5.74  | -0.22 | 0.82553 |
| TMEM64     | -0.02 | 6.51  | -0.22 | 0.82580 |
| MEMO1P1    | 0.02  | 5.03  | 0.22  | 0.82586 |
| TP53I11    | -0.03 | 10.49 | -0.22 | 0.82588 |
| OSGEP      | 0.01  | 9.28  | 0.22  | 0.82592 |
| KANK3      | -0.03 | 5.83  | -0.22 | 0.82603 |
| H6PD       | -0.02 | 10.46 | -0.22 | 0.82612 |
| PPA1       | 0.03  | 8.69  | 0.22  | 0.82624 |
| AC009078.1 | -0.06 | 5.64  | -0.22 | 0.82634 |



|            |       |       |       |         |
|------------|-------|-------|-------|---------|
| DOCK3      | -0.03 | 5.09  | -0.22 | 0.82636 |
| HNRNPCP2   | -0.03 | 7.97  | -0.22 | 0.82669 |
| ELP2       | 0.02  | 8.88  | 0.22  | 0.82683 |
| USP53      | -0.03 | 6.14  | -0.22 | 0.82689 |
| HADH       | 0.02  | 7.67  | 0.22  | 0.82694 |
| Z95114.3   | 0.03  | 5.22  | 0.22  | 0.82697 |
| LRRC75B    | -0.03 | 5.40  | -0.22 | 0.82698 |
| SLC2A8     | 0.03  | 6.64  | 0.22  | 0.82706 |
| FSTL4      | -0.03 | 5.00  | -0.22 | 0.82723 |
| LIN52      | -0.02 | 6.72  | -0.22 | 0.82744 |
| HAS3       | 0.02  | 5.37  | 0.22  | 0.82768 |
| ZCCHC24    | -0.02 | 7.13  | -0.22 | 0.82793 |
| H2AC8      | -0.03 | 5.77  | -0.22 | 0.82793 |
| ANO8       | -0.03 | 7.15  | -0.22 | 0.82798 |
| TDG        | 0.02  | 7.26  | 0.22  | 0.82802 |
| LRRC8C-DT  | -0.02 | 5.77  | -0.22 | 0.82817 |
| ZBTB7B     | 0.02  | 11.11 | 0.22  | 0.82818 |
| FCF1       | -0.02 | 8.05  | -0.22 | 0.82819 |
| NPHP4      | -0.02 | 7.62  | -0.22 | 0.82825 |
| TSG101     | 0.02  | 8.86  | 0.22  | 0.82829 |
| SFTPD      | 0.03  | 5.02  | 0.22  | 0.82837 |
| MCM2       | -0.02 | 8.05  | -0.22 | 0.82838 |
| ABCA7      | 0.03  | 11.45 | 0.22  | 0.82839 |
| PARD6B     | 0.02  | 5.04  | 0.22  | 0.82847 |
| SLC17A5    | -0.02 | 7.42  | -0.22 | 0.82847 |
| SUMO1P3    | -0.02 | 5.25  | -0.22 | 0.82866 |
| GPR153     | -0.03 | 6.35  | -0.22 | 0.82878 |
| PTPRN2     | -0.03 | 7.80  | -0.22 | 0.82892 |
| LILRB5     | 0.05  | 6.26  | 0.22  | 0.82910 |
| KLRG1      | 0.03  | 8.06  | 0.22  | 0.82928 |
| MT-ND2     | -0.02 | 14.10 | -0.22 | 0.82939 |
| IGHV4-31   | -0.07 | 6.57  | -0.22 | 0.82940 |
| ARHGAP11A  | -0.02 | 5.58  | -0.22 | 0.82945 |
| VASH1      | -0.04 | 8.60  | -0.22 | 0.82949 |
| TMSB4XP2   | 0.03  | 6.07  | 0.22  | 0.82960 |
| EPN2       | -0.02 | 6.97  | -0.22 | 0.82964 |
| AC116347.1 | 0.03  | 6.89  | 0.22  | 0.82987 |
| AC005840.2 | -0.03 | 5.11  | -0.22 | 0.82997 |
| CHRA1      | -0.02 | 8.36  | -0.22 | 0.83011 |
| CUX2       | 0.03  | 5.18  | 0.22  | 0.83016 |
| HPS4       | 0.01  | 8.86  | 0.22  | 0.83023 |
| PODXL      | 0.03  | 5.19  | 0.21  | 0.83083 |
| BABAM2     | 0.02  | 8.73  | 0.21  | 0.83092 |
| GRB2       | -0.02 | 12.56 | -0.21 | 0.83092 |
| E2F1       | 0.02  | 6.48  | 0.21  | 0.83101 |
| AC244034.1 | -0.02 | 5.36  | -0.21 | 0.83124 |
| COX11      | 0.02  | 7.25  | 0.21  | 0.83137 |
| NACA3P     | 0.03  | 8.05  | 0.21  | 0.83139 |
| H4C5       | -0.02 | 5.36  | -0.21 | 0.83160 |
| ZNF805     | 0.02  | 6.22  | 0.21  | 0.83189 |

|             |       |       |       |         |
|-------------|-------|-------|-------|---------|
| AC104763.1  | 0.03  | 5.02  | 0.21  | 0.83190 |
| PRKAB1      | 0.01  | 9.06  | 0.21  | 0.83202 |
| TMEM268     | -0.02 | 7.91  | -0.21 | 0.83209 |
| AC007318.1  | -0.02 | 6.25  | -0.21 | 0.83219 |
| ZNF385D     | -0.03 | 5.29  | -0.21 | 0.83234 |
| TMEM231     | -0.02 | 5.10  | -0.21 | 0.83238 |
| NUP214      | 0.02  | 11.34 | 0.21  | 0.83253 |
| THOC3       | 0.02  | 7.04  | 0.21  | 0.83255 |
| PIGV        | -0.01 | 7.66  | -0.21 | 0.83259 |
| SCAND2P     | -0.02 | 7.47  | -0.21 | 0.83264 |
| TYMP        | -0.03 | 12.30 | -0.21 | 0.83284 |
| CTIF        | -0.02 | 7.70  | -0.21 | 0.83307 |
| ZDHHC11B    | 0.03  | 5.26  | 0.21  | 0.83311 |
| AP001994.1  | 0.03  | 5.35  | 0.21  | 0.83315 |
| AC012306.4  | 0.02  | 4.99  | 0.21  | 0.83334 |
| DYNLL1P1    | 0.03  | 5.27  | 0.21  | 0.83350 |
| ARAP1       | -0.02 | 13.65 | -0.21 | 0.83357 |
| AC137932.2  | 0.03  | 6.68  | 0.21  | 0.83365 |
| ZNF862      | -0.02 | 8.96  | -0.21 | 0.83371 |
| PMS2P3      | 0.03  | 5.93  | 0.21  | 0.83389 |
| RILPL1      | 0.03  | 6.68  | 0.21  | 0.83400 |
| KCNC3       | -0.03 | 7.06  | -0.21 | 0.83403 |
| TMSB4XP6    | 0.03  | 7.92  | 0.21  | 0.83414 |
| EIF3L       | 0.02  | 10.91 | 0.21  | 0.83431 |
| CNTNAP2     | 0.03  | 5.33  | 0.21  | 0.83432 |
| AL122018.1  | -0.02 | 5.24  | -0.21 | 0.83436 |
| SCYL3       | 0.02  | 7.99  | 0.21  | 0.83440 |
| VPS16       | 0.02  | 9.91  | 0.21  | 0.83442 |
| HNRNPA1P7   | -0.03 | 7.68  | -0.21 | 0.83461 |
| GNAI2P1     | 0.03  | 6.79  | 0.21  | 0.83469 |
| IL2RA       | 0.02  | 7.37  | 0.21  | 0.83492 |
| SFXN5       | 0.02  | 8.65  | 0.21  | 0.83494 |
| CDK2AP1     | 0.02  | 8.26  | 0.21  | 0.83506 |
| TMEM147-AS1 | -0.03 | 6.89  | -0.21 | 0.83511 |
| CD33        | -0.02 | 9.52  | -0.21 | 0.83524 |
| SEC11B      | -0.03 | 5.96  | -0.21 | 0.83530 |
| C6orf89     | -0.01 | 10.65 | -0.21 | 0.83536 |
| GGNBP2      | -0.01 | 9.78  | -0.21 | 0.83538 |
| PLXNA4      | 0.03  | 5.68  | 0.21  | 0.83543 |
| ZNF808      | 0.02  | 6.57  | 0.21  | 0.83554 |
| TCAF1       | 0.02  | 6.23  | 0.21  | 0.83561 |
| ZFYVE28     | -0.02 | 8.02  | -0.21 | 0.83563 |
| MAP3K6      | -0.03 | 7.74  | -0.21 | 0.83563 |
| AC138409.2  | 0.03  | 5.44  | 0.21  | 0.83569 |
| RBM4        | -0.02 | 7.34  | -0.21 | 0.83573 |
| NKRF        | 0.02  | 6.86  | 0.21  | 0.83574 |
| XBP1        | 0.02  | 10.70 | 0.21  | 0.83576 |
| EEF1A1P25   | 0.02  | 5.70  | 0.21  | 0.83590 |
| AC016065.1  | 0.02  | 5.64  | 0.21  | 0.83604 |
| SLC45A1     | 0.02  | 5.16  | 0.21  | 0.83609 |

|            |       |       |       |         |
|------------|-------|-------|-------|---------|
| AC104162.2 | -0.03 | 5.75  | -0.21 | 0.83626 |
| AC083798.2 | 0.02  | 5.81  | 0.21  | 0.83634 |
| AC008429.2 | 0.02  | 5.29  | 0.21  | 0.83648 |
| AC106795.2 | 0.03  | 5.66  | 0.21  | 0.83667 |
| PGBD4      | 0.02  | 5.52  | 0.21  | 0.83679 |
| SMKR1      | 0.02  | 5.29  | 0.21  | 0.83679 |
| ZNF285     | 0.02  | 5.03  | 0.21  | 0.83697 |
| ZNF354C    | 0.02  | 6.12  | 0.21  | 0.83700 |
| TLCD4      | 0.03  | 5.06  | 0.21  | 0.83701 |
| TERF1      | 0.02  | 7.32  | 0.21  | 0.83704 |
| GLRX3      | 0.01  | 7.93  | 0.21  | 0.83711 |
| CYBC1      | 0.02  | 12.16 | 0.21  | 0.83725 |
| MRPS14     | 0.02  | 8.07  | 0.21  | 0.83752 |
| EEF1A1P5   | 0.03  | 12.31 | 0.21  | 0.83778 |
| SEMA4B     | -0.02 | 10.90 | -0.21 | 0.83780 |
| CUX1       | 0.02  | 10.78 | 0.21  | 0.83784 |
| AURKB      | 0.02  | 5.93  | 0.21  | 0.83793 |
| NAGA       | -0.02 | 10.48 | -0.21 | 0.83811 |
| OSBPL10    | -0.03 | 6.65  | -0.21 | 0.83817 |
| LYPLA2P2   | 0.02  | 5.36  | 0.21  | 0.83820 |
| STX1A      | 0.02  | 6.55  | 0.20  | 0.83868 |
| CLDND2     | 0.03  | 6.44  | 0.20  | 0.83897 |
| GPRIN1     | 0.03  | 5.75  | 0.20  | 0.83898 |
| PGAM1P8    | 0.03  | 6.18  | 0.20  | 0.83902 |
| AC073335.1 | -0.02 | 5.92  | -0.20 | 0.83910 |
| FECH       | 0.04  | 8.75  | 0.20  | 0.83911 |
| BORCS8     | 0.02  | 8.18  | 0.20  | 0.83914 |
| GLRX3P2    | 0.02  | 5.06  | 0.20  | 0.83926 |
| DHPS       | -0.03 | 6.68  | -0.20 | 0.83928 |
| LILRB1     | -0.02 | 10.89 | -0.20 | 0.83931 |
| MARK2      | -0.02 | 11.10 | -0.20 | 0.83936 |
| CEP97      | -0.02 | 5.93  | -0.20 | 0.83965 |
| GPAT4      | 0.01  | 10.12 | 0.20  | 0.83976 |
| RASA3      | 0.01  | 11.55 | 0.20  | 0.83979 |
| NOL12      | 0.03  | 7.23  | 0.20  | 0.83982 |
| AC073130.3 | 0.03  | 5.21  | 0.20  | 0.83988 |
| C3orf18    | 0.02  | 7.31  | 0.20  | 0.83995 |
| RALGPS1    | 0.02  | 6.81  | 0.20  | 0.83996 |
| AL365272.1 | -0.03 | 5.47  | -0.20 | 0.84004 |
| TNFSF8     | -0.02 | 8.18  | -0.20 | 0.84020 |
| MTND4P12   | -0.06 | 7.21  | -0.20 | 0.84023 |
| MAPK7      | -0.01 | 8.40  | -0.20 | 0.84023 |
| FAM168B    | -0.01 | 10.35 | -0.20 | 0.84024 |
| LINC00278  | -0.04 | 4.95  | -0.20 | 0.84032 |
| AC120114.3 | -0.03 | 6.22  | -0.20 | 0.84047 |
| ASNSD1     | 0.02  | 7.38  | 0.20  | 0.84057 |
| CACNG6     | 0.03  | 5.71  | 0.20  | 0.84062 |
| F12        | 0.03  | 6.00  | 0.20  | 0.84070 |
| CYP2T1P    | 0.03  | 6.15  | 0.20  | 0.84079 |
| LY86-AS1   | 0.03  | 5.28  | 0.20  | 0.84082 |

|             |       |       |       |         |
|-------------|-------|-------|-------|---------|
| SCP2        | -0.02 | 8.74  | -0.20 | 0.84096 |
| ANKZF1      | 0.02  | 10.31 | 0.20  | 0.84108 |
| ANP32C      | 0.03  | 6.50  | 0.20  | 0.84117 |
| CPM         | 0.02  | 6.85  | 0.20  | 0.84120 |
| GBA         | 0.02  | 9.79  | 0.20  | 0.84133 |
| BAIAP2-DT   | -0.02 | 8.42  | -0.20 | 0.84137 |
| POLR1B      | -0.02 | 7.96  | -0.20 | 0.84145 |
| HECW2-AS1   | 0.02  | 5.32  | 0.20  | 0.84148 |
| NASP        | -0.01 | 9.41  | -0.20 | 0.84151 |
| LPP-AS2     | 0.02  | 5.29  | 0.20  | 0.84160 |
| MAPRE3      | -0.02 | 7.21  | -0.20 | 0.84168 |
| IGKV2-28    | 0.04  | 5.82  | 0.20  | 0.84171 |
| ZNF507      | 0.02  | 7.10  | 0.20  | 0.84180 |
| NPIPA5      | 0.03  | 6.50  | 0.20  | 0.84182 |
| TXNDC12     | -0.02 | 5.87  | -0.20 | 0.84185 |
| CHRM3-AS2   | 0.04  | 7.41  | 0.20  | 0.84189 |
| FTH1P15     | -0.02 | 5.84  | -0.20 | 0.84197 |
| CDKL1       | 0.02  | 5.84  | 0.20  | 0.84198 |
| PSMA6P1     | -0.03 | 5.80  | -0.20 | 0.84227 |
| FAM156B     | -0.03 | 5.45  | -0.20 | 0.84228 |
| CLIC1P1     | -0.02 | 7.24  | -0.20 | 0.84255 |
| AP000873.2  | -0.03 | 5.19  | -0.20 | 0.84256 |
| FGFR1       | -0.03 | 7.18  | -0.20 | 0.84259 |
| CHCHD2P6    | 0.02  | 5.70  | 0.20  | 0.84262 |
| LINC00653   | -0.03 | 5.26  | -0.20 | 0.84278 |
| HADHAP2     | 0.03  | 6.42  | 0.20  | 0.84290 |
| ZBTB16      | -0.03 | 7.91  | -0.20 | 0.84302 |
| AOC1        | -0.05 | 5.93  | -0.20 | 0.84305 |
| KCNC4       | -0.02 | 6.29  | -0.20 | 0.84305 |
| AL162253.2  | 0.03  | 5.05  | 0.20  | 0.84317 |
| IQCG        | -0.02 | 6.18  | -0.20 | 0.84327 |
| MAP7        | -0.03 | 5.81  | -0.20 | 0.84335 |
| SURF4       | 0.01  | 10.76 | 0.20  | 0.84347 |
| RASGEF1A    | -0.02 | 7.26  | -0.20 | 0.84353 |
| CMTM2       | -0.04 | 10.74 | -0.20 | 0.84354 |
| TAOK2       | 0.01  | 9.98  | 0.20  | 0.84367 |
| UBQLN4      | 0.01  | 8.81  | 0.20  | 0.84371 |
| AC124798.1  | -0.02 | 5.35  | -0.20 | 0.84373 |
| AC104958.2  | 0.02  | 5.71  | 0.20  | 0.84380 |
| CACNA2D2    | -0.03 | 7.75  | -0.20 | 0.84389 |
| FAM124B     | -0.02 | 5.09  | -0.20 | 0.84389 |
| UBXN8       | -0.02 | 5.87  | -0.20 | 0.84400 |
| PKNOX1      | -0.02 | 8.31  | -0.20 | 0.84417 |
| MAP3K14-AS1 | 0.02  | 6.37  | 0.20  | 0.84441 |
| CFP         | 0.02  | 9.98  | 0.20  | 0.84455 |
| PSMA3       | -0.01 | 8.61  | -0.20 | 0.84488 |
| SLC25A35    | -0.02 | 6.86  | -0.20 | 0.84493 |
| RPA2        | -0.02 | 9.96  | -0.20 | 0.84499 |
| AC009961.1  | 0.02  | 5.16  | 0.20  | 0.84500 |
| NRP1        | 0.03  | 5.49  | 0.20  | 0.84511 |

|            |       |       |       |         |
|------------|-------|-------|-------|---------|
| XRR1       | -0.03 | 6.57  | -0.20 | 0.84533 |
| KLHL14     | 0.03  | 5.47  | 0.20  | 0.84546 |
| MAP4       | 0.01  | 10.27 | 0.20  | 0.84548 |
| PNO1       | 0.02  | 6.52  | 0.20  | 0.84548 |
| FAM193B    | -0.03 | 10.65 | -0.20 | 0.84554 |
| MYL12BP1   | -0.03 | 6.23  | -0.20 | 0.84559 |
| AC126474.2 | -0.02 | 7.11  | -0.20 | 0.84561 |
| WASF2      | 0.02  | 11.96 | 0.20  | 0.84563 |
| SCARB1     | -0.02 | 7.65  | -0.20 | 0.84573 |
| AFMID      | 0.02  | 6.76  | 0.20  | 0.84577 |
| SHROOM1    | -0.04 | 6.97  | -0.20 | 0.84580 |
| PEX19      | 0.01  | 8.39  | 0.20  | 0.84581 |
| MEX3D      | 0.02  | 5.93  | 0.20  | 0.84584 |
| PLIN2      | 0.01  | 9.20  | 0.20  | 0.84595 |
| IL7R       | 0.03  | 11.63 | 0.20  | 0.84612 |
| ZNF888     | -0.02 | 6.43  | -0.19 | 0.84629 |
| OTOF       | -0.04 | 5.92  | -0.19 | 0.84651 |
| IL10RB     | -0.02 | 6.25  | -0.19 | 0.84659 |
| FAM20A     | 0.03  | 5.19  | 0.19  | 0.84665 |
| RPP38      | -0.01 | 7.99  | -0.19 | 0.84687 |
| MPP2       | -0.03 | 5.21  | -0.19 | 0.84691 |
| SMN2       | -0.02 | 5.85  | -0.19 | 0.84698 |
| SLC7A6OS   | -0.01 | 8.73  | -0.19 | 0.84724 |
| AL121871.1 | 0.03  | 7.06  | 0.19  | 0.84724 |
| MICALL2    | -0.02 | 5.90  | -0.19 | 0.84730 |
| POLR3D     | -0.01 | 8.00  | -0.19 | 0.84732 |
| SCARNA20   | -0.03 | 5.02  | -0.19 | 0.84744 |
| AC005244.1 | 0.02  | 5.24  | 0.19  | 0.84749 |
| RPA3       | -0.02 | 7.26  | -0.19 | 0.84752 |
| SZT2       | -0.01 | 10.29 | -0.19 | 0.84767 |
| DIS3       | 0.02  | 8.13  | 0.19  | 0.84781 |
| TNF        | -0.02 | 7.79  | -0.19 | 0.84782 |
| NBR2       | 0.02  | 6.65  | 0.19  | 0.84820 |
| ALG12      | 0.01  | 8.84  | 0.19  | 0.84837 |
| ATP2B1-AS1 | -0.02 | 5.70  | -0.19 | 0.84849 |
| GUF1       | 0.02  | 6.87  | 0.19  | 0.84855 |
| YIPF1      | 0.02  | 9.20  | 0.19  | 0.84863 |
| CD9        | -0.04 | 8.42  | -0.19 | 0.84884 |
| VLDLR      | 0.03  | 5.26  | 0.19  | 0.84891 |
| U2AF1      | 0.03  | 6.60  | 0.19  | 0.84893 |
| RPL21P123  | -0.03 | 5.08  | -0.19 | 0.84898 |
| RPL34P33   | 0.03  | 6.10  | 0.19  | 0.84901 |
| KALRN      | 0.02  | 5.80  | 0.19  | 0.84909 |
| AL158206.1 | -0.02 | 5.47  | -0.19 | 0.84910 |
| SGSM3      | -0.02 | 5.89  | -0.19 | 0.84921 |
| COL9A2     | 0.04  | 7.59  | 0.19  | 0.84931 |
| MTURN      | 0.02  | 9.18  | 0.19  | 0.84933 |
| SDCCAG8    | 0.01  | 7.85  | 0.19  | 0.84938 |
| RALA       | 0.01  | 8.19  | 0.19  | 0.84939 |
| ZNF584     | -0.02 | 6.32  | -0.19 | 0.84941 |

|            |       |       |       |         |
|------------|-------|-------|-------|---------|
| WDR97      | 0.03  | 5.73  | 0.19  | 0.84945 |
| HSPE1      | 0.02  | 6.63  | 0.19  | 0.84948 |
| SLC22A18   | -0.03 | 8.70  | -0.19 | 0.84951 |
| STAT5A     | 0.01  | 11.63 | 0.19  | 0.84952 |
| SLC35E1    | 0.01  | 9.21  | 0.19  | 0.84963 |
| NSUN6      | -0.02 | 6.42  | -0.19 | 0.84970 |
| TMEM128    | 0.01  | 6.94  | 0.19  | 0.84997 |
| ARHGAP32   | 0.02  | 6.44  | 0.19  | 0.85007 |
| VSTM1      | 0.04  | 8.11  | 0.19  | 0.85021 |
| NDUFAF6    | -0.02 | 6.00  | -0.19 | 0.85021 |
| ZNF766     | -0.01 | 8.19  | -0.19 | 0.85045 |
| COL11A2    | 0.02  | 5.09  | 0.19  | 0.85060 |
| ARID4B     | 0.02  | 9.61  | 0.19  | 0.85069 |
| RPS26P3    | -0.04 | 6.50  | -0.19 | 0.85085 |
| MRPL48     | 0.02  | 7.64  | 0.19  | 0.85088 |
| LRCH3      | 0.01  | 8.93  | 0.19  | 0.85090 |
| AL513477.1 | -0.02 | 5.52  | -0.19 | 0.85091 |
| ZC2HC1A    | 0.02  | 5.20  | 0.19  | 0.85094 |
| CD248      | 0.04  | 6.31  | 0.19  | 0.85138 |
| FAM153A    | 0.04  | 6.18  | 0.19  | 0.85142 |
| SERBP1     | 0.01  | 10.45 | 0.19  | 0.85144 |
| FN3KRP     | 0.02  | 8.41  | 0.19  | 0.85148 |
| ELMOD3     | 0.01  | 8.81  | 0.19  | 0.85149 |
| TRDV2      | 0.04  | 5.88  | 0.19  | 0.85149 |
| TDRKH      | 0.02  | 6.94  | 0.19  | 0.85156 |
| EMBP1      | 0.03  | 6.01  | 0.19  | 0.85161 |
| TPRG1      | -0.03 | 6.60  | -0.19 | 0.85161 |
| RNF214     | 0.01  | 8.19  | 0.19  | 0.85172 |
| ZNF841     | -0.02 | 6.60  | -0.19 | 0.85180 |
| SLC2A1     | 0.03  | 9.68  | 0.19  | 0.85180 |
| TNFSF4     | -0.02 | 6.03  | -0.19 | 0.85192 |
| PIAS2      | -0.02 | 7.32  | -0.19 | 0.85194 |
| LUC7L      | 0.02  | 8.86  | 0.19  | 0.85208 |
| SNTB2      | -0.02 | 7.50  | -0.19 | 0.85208 |
| GGCT       | 0.02  | 6.52  | 0.19  | 0.85218 |
| PLCB3      | 0.02  | 8.65  | 0.19  | 0.85225 |
| PAOX       | -0.02 | 4.96  | -0.19 | 0.85232 |
| AC118344.4 | -0.03 | 5.45  | -0.19 | 0.85243 |
| UACA       | 0.02  | 5.43  | 0.19  | 0.85268 |
| LIX1L      | -0.01 | 8.67  | -0.19 | 0.85279 |
| SEMA6C     | 0.02  | 6.08  | 0.19  | 0.85282 |
| MIPEP      | -0.02 | 6.15  | -0.19 | 0.85290 |
| TCP11L1    | -0.02 | 6.43  | -0.19 | 0.85297 |
| HMGN3      | 0.02  | 8.48  | 0.19  | 0.85299 |
| NR6A1      | 0.02  | 7.01  | 0.19  | 0.85300 |
| TRBV29-1   | 0.03  | 7.61  | 0.19  | 0.85308 |
| CEBPA-DT   | 0.02  | 5.40  | 0.19  | 0.85309 |
| AC092428.1 | 0.02  | 4.99  | 0.19  | 0.85325 |
| AC245452.1 | -0.02 | 5.85  | -0.19 | 0.85327 |
| NELL2      | 0.03  | 8.87  | 0.19  | 0.85337 |

|            |       |       |       |         |
|------------|-------|-------|-------|---------|
| NRG1       | 0.04  | 7.02  | 0.19  | 0.85339 |
| SLIT1      | 0.02  | 5.42  | 0.19  | 0.85346 |
| NUDT9      | -0.01 | 7.30  | -0.19 | 0.85352 |
| ATG7       | -0.01 | 9.44  | -0.19 | 0.85356 |
| KANK1      | 0.03  | 6.35  | 0.19  | 0.85388 |
| ZWILCH     | 0.02  | 5.71  | 0.19  | 0.85393 |
| ISCA1      | -0.02 | 7.46  | -0.18 | 0.85416 |
| RASD1      | -0.02 | 5.04  | -0.18 | 0.85418 |
| DBIP1      | 0.02  | 5.57  | 0.18  | 0.85422 |
| TMEM251    | 0.02  | 6.19  | 0.18  | 0.85433 |
| AC020658.1 | 0.01  | 5.49  | 0.18  | 0.85442 |
| EIF4BP7    | -0.02 | 6.51  | -0.18 | 0.85448 |
| AL590764.1 | 0.02  | 5.96  | 0.18  | 0.85457 |
| CKMT2-AS1  | -0.02 | 6.02  | -0.18 | 0.85478 |
| LYSMD1     | 0.02  | 5.36  | 0.18  | 0.85487 |
| TTC7B      | -0.03 | 6.69  | -0.18 | 0.85488 |
| PLTP       | 0.02  | 6.29  | 0.18  | 0.85497 |
| WDR45P1    | -0.03 | 6.38  | -0.18 | 0.85515 |
| NCF1B      | -0.03 | 10.73 | -0.18 | 0.85521 |
| TAF15      | 0.02  | 10.21 | 0.18  | 0.85532 |
| COL5A3     | 0.06  | 6.43  | 0.18  | 0.85539 |
| KMT2B      | -0.01 | 11.08 | -0.18 | 0.85541 |
| SKA2       | 0.02  | 6.68  | 0.18  | 0.85550 |
| IGBP1P1    | -0.02 | 5.24  | -0.18 | 0.85552 |
| SUMO2      | -0.01 | 9.65  | -0.18 | 0.85616 |
| CD8A       | 0.03  | 10.61 | 0.18  | 0.85634 |
| BAK1P1     | -0.02 | 5.34  | -0.18 | 0.85637 |
| ACTA2      | -0.03 | 7.44  | -0.18 | 0.85646 |
| AL353807.3 | -0.02 | 5.45  | -0.18 | 0.85677 |
| METTL5     | 0.02  | 7.16  | 0.18  | 0.85680 |
| RGL4       | 0.03  | 9.61  | 0.18  | 0.85684 |
| AL627171.3 | 0.02  | 5.12  | 0.18  | 0.85698 |
| AC092117.1 | -0.02 | 5.55  | -0.18 | 0.85699 |
| MAP3K12    | -0.02 | 7.98  | -0.18 | 0.85699 |
| PGD        | -0.02 | 12.52 | -0.18 | 0.85718 |
| AC024451.2 | 0.02  | 5.54  | 0.18  | 0.85727 |
| CHMP4BP1   | 0.02  | 6.21  | 0.18  | 0.85735 |
| DGCR11     | -0.02 | 5.24  | -0.18 | 0.85750 |
| POM121C    | -0.01 | 9.86  | -0.18 | 0.85758 |
| PTDSS1     | 0.01  | 10.30 | 0.18  | 0.85761 |
| SUMF1      | -0.01 | 8.75  | -0.18 | 0.85765 |
| AC010247.1 | 0.02  | 5.58  | 0.18  | 0.85771 |
| KDM4B      | -0.02 | 10.76 | -0.18 | 0.85813 |
| ZNF343     | -0.01 | 6.65  | -0.18 | 0.85818 |
| SPATA33    | 0.02  | 6.49  | 0.18  | 0.85823 |
| DCHS1      | -0.03 | 7.53  | -0.18 | 0.85824 |
| TENT5A     | -0.02 | 8.75  | -0.18 | 0.85831 |
| LRRC42     | 0.02  | 6.93  | 0.18  | 0.85836 |
| NFKBIA     | -0.02 | 10.63 | -0.18 | 0.85855 |
| FTH1P11    | -0.03 | 8.45  | -0.18 | 0.85856 |

|            |       |       |       |         |
|------------|-------|-------|-------|---------|
| ANKRD13B   | -0.02 | 5.62  | -0.18 | 0.85856 |
| ABI2       | -0.01 | 7.03  | -0.18 | 0.85858 |
| AC007238.1 | 0.02  | 7.23  | 0.18  | 0.85879 |
| SPACA6     | -0.03 | 6.37  | -0.18 | 0.85885 |
| AC022098.1 | 0.02  | 7.07  | 0.18  | 0.85895 |
| ATP7B      | 0.02  | 5.30  | 0.18  | 0.85906 |
| RDH14      | -0.02 | 6.33  | -0.18 | 0.85915 |
| AC132872.5 | -0.03 | 5.60  | -0.18 | 0.85933 |
| AC010327.6 | 0.02  | 6.38  | 0.18  | 0.85997 |
| TMEM97     | 0.02  | 5.81  | 0.18  | 0.86008 |
| AC005786.3 | -0.03 | 5.54  | -0.18 | 0.86021 |
| GIN52      | -0.02 | 5.57  | -0.18 | 0.86025 |
| BCL2       | 0.02  | 9.10  | 0.18  | 0.86026 |
| GAS8       | 0.01  | 6.48  | 0.18  | 0.86031 |
| AFTPH      | 0.01  | 9.65  | 0.18  | 0.86070 |
| TPM4       | -0.01 | 11.49 | -0.18 | 0.86078 |
| LINC02362  | -0.02 | 5.01  | -0.18 | 0.86082 |
| TM7SF3     | 0.01  | 8.47  | 0.18  | 0.86093 |
| FUCA2      | -0.02 | 8.20  | -0.18 | 0.86118 |
| LINC02084  | 0.02  | 7.20  | 0.18  | 0.86121 |
| AQP1       | 0.03  | 5.76  | 0.18  | 0.86122 |
| SRPRB      | 0.02  | 8.75  | 0.18  | 0.86139 |
| YEATS4     | 0.02  | 6.57  | 0.18  | 0.86149 |
| SMYD2      | -0.01 | 7.90  | -0.18 | 0.86162 |
| WIZ        | 0.01  | 8.82  | 0.18  | 0.86165 |
| HSD17B7P2  | 0.02  | 5.72  | 0.18  | 0.86172 |
| XKR8       | -0.02 | 9.97  | -0.17 | 0.86179 |
| CISH       | 0.02  | 9.64  | 0.17  | 0.86181 |
| IL10RA     | 0.01  | 12.23 | 0.17  | 0.86184 |
| IL11RA     | 0.03  | 8.59  | 0.17  | 0.86188 |
| POLR3C     | 0.01  | 8.59  | 0.17  | 0.86188 |
| MMP25      | -0.04 | 13.37 | -0.17 | 0.86194 |
| TTC38      | 0.02  | 9.73  | 0.17  | 0.86197 |
| CBR3-AS1   | 0.02  | 5.38  | 0.17  | 0.86200 |
| IL4I1      | -0.02 | 6.55  | -0.17 | 0.86200 |
| IPO5P1     | 0.02  | 6.29  | 0.17  | 0.86201 |
| ERICH6-AS1 | 0.02  | 5.35  | 0.17  | 0.86206 |
| STEAP3     | -0.02 | 6.71  | -0.17 | 0.86209 |
| RPS17      | -0.02 | 6.02  | -0.17 | 0.86224 |
| IKZF4      | -0.02 | 6.30  | -0.17 | 0.86231 |
| TIGIT      | -0.02 | 8.92  | -0.17 | 0.86233 |
| MGST2      | -0.02 | 7.88  | -0.17 | 0.86233 |
| AARS2      | -0.01 | 8.09  | -0.17 | 0.86236 |
| PRXL2C     | -0.02 | 6.84  | -0.17 | 0.86243 |
| IQCE       | -0.02 | 8.55  | -0.17 | 0.86255 |
| AC015802.6 | 0.03  | 7.44  | 0.17  | 0.86259 |
| WBP1       | 0.02  | 6.76  | 0.17  | 0.86273 |
| ZNF226     | 0.01  | 7.63  | 0.17  | 0.86289 |
| SLC25A51   | -0.02 | 6.10  | -0.17 | 0.86289 |
| NACA2      | 0.02  | 8.63  | 0.17  | 0.86300 |



|             |       |       |       |         |
|-------------|-------|-------|-------|---------|
| NRROS       | -0.02 | 9.76  | -0.17 | 0.86302 |
| TRIP6       | 0.02  | 7.20  | 0.17  | 0.86303 |
| NT5C3B      | 0.02  | 7.25  | 0.17  | 0.86322 |
| FOXK1       | 0.01  | 9.32  | 0.17  | 0.86324 |
| SAP18P2     | 0.02  | 5.28  | 0.17  | 0.86325 |
| HSBP1       | 0.01  | 9.43  | 0.17  | 0.86347 |
| LRRC75A     | 0.02  | 7.06  | 0.17  | 0.86359 |
| RINT1       | -0.02 | 7.08  | -0.17 | 0.86359 |
| PDZD11      | -0.01 | 7.49  | -0.17 | 0.86389 |
| SNX12       | 0.01  | 8.59  | 0.17  | 0.86405 |
| APOBEC3F    | 0.02  | 8.06  | 0.17  | 0.86422 |
| XKR6        | 0.02  | 5.48  | 0.17  | 0.86426 |
| HLA-H       | -0.05 | 12.95 | -0.17 | 0.86439 |
| ARPC3P5     | 0.02  | 5.68  | 0.17  | 0.86443 |
| IER5L       | 0.02  | 7.41  | 0.17  | 0.86450 |
| RPL5P9      | -0.02 | 5.36  | -0.17 | 0.86456 |
| CEBPZ       | -0.01 | 8.50  | -0.17 | 0.86456 |
| RYR1        | 0.02  | 6.82  | 0.17  | 0.86460 |
| TMCO6       | 0.01  | 8.42  | 0.17  | 0.86466 |
| CD300C      | -0.02 | 8.75  | -0.17 | 0.86467 |
| SQLE        | -0.02 | 6.21  | -0.17 | 0.86474 |
| ASS1P1      | -0.03 | 5.44  | -0.17 | 0.86504 |
| RPGRIP1     | -0.02 | 7.28  | -0.17 | 0.86508 |
| RPL17P34    | 0.02  | 5.15  | 0.17  | 0.86508 |
| AC007569.1  | 0.03  | 5.56  | 0.17  | 0.86524 |
| HIPK2       | -0.02 | 9.15  | -0.17 | 0.86534 |
| AL355581.1  | -0.02 | 5.37  | -0.17 | 0.86543 |
| SLC46A2     | -0.02 | 7.85  | -0.17 | 0.86573 |
| RABGGTB     | 0.01  | 7.88  | 0.17  | 0.86576 |
| FAM219B     | -0.01 | 8.80  | -0.17 | 0.86580 |
| AL603766.1  | -0.02 | 5.45  | -0.17 | 0.86599 |
| HNRNPA1P52  | 0.02  | 5.14  | 0.17  | 0.86632 |
| ACTR3B      | 0.02  | 6.80  | 0.17  | 0.86632 |
| PDE4D       | 0.02  | 6.72  | 0.17  | 0.86636 |
| STK17A      | -0.01 | 9.33  | -0.17 | 0.86644 |
| TREX2       | -0.02 | 5.37  | -0.17 | 0.86659 |
| IMMP2L      | 0.02  | 5.59  | 0.17  | 0.86659 |
| GPR84       | 0.03  | 5.74  | 0.17  | 0.86667 |
| FAM118B     | 0.01  | 7.73  | 0.17  | 0.86669 |
| AC114491.1  | -0.02 | 5.59  | -0.17 | 0.86674 |
| CSNK1D      | -0.01 | 12.12 | -0.17 | 0.86689 |
| PDIA5       | 0.02  | 6.93  | 0.17  | 0.86721 |
| SLFN12L     | 0.02  | 6.05  | 0.17  | 0.86733 |
| AL732372.3  | -0.03 | 6.41  | -0.17 | 0.86734 |
| C11orf54    | -0.02 | 7.42  | -0.17 | 0.86737 |
| EIF2S3      | 0.01  | 10.27 | 0.17  | 0.86753 |
| PTPRS       | 0.03  | 6.47  | 0.17  | 0.86778 |
| SUSD4       | 0.02  | 6.44  | 0.17  | 0.86790 |
| DPEP3       | 0.03  | 8.12  | 0.17  | 0.86793 |
| L3MBTL2-AS1 | -0.02 | 5.28  | -0.17 | 0.86808 |

|            |       |       |       |         |
|------------|-------|-------|-------|---------|
| TRAV14DV4  | 0.03  | 6.04  | 0.17  | 0.86833 |
| EXOSC10    | -0.01 | 9.88  | -0.17 | 0.86874 |
| KLHL42     | -0.01 | 7.01  | -0.17 | 0.86874 |
| MRPL42     | -0.01 | 7.51  | -0.17 | 0.86875 |
| S1PR5      | 0.03  | 9.72  | 0.17  | 0.86898 |
| RPH3AL     | -0.02 | 6.20  | -0.17 | 0.86900 |
| IFI27      | -0.04 | 6.17  | -0.17 | 0.86906 |
| NYNRIN     | -0.02 | 5.02  | -0.17 | 0.86912 |
| AC055716.2 | 0.02  | 5.79  | 0.17  | 0.86913 |
| PRF1       | 0.02  | 13.00 | 0.17  | 0.86924 |
| TMCO1      | -0.01 | 8.89  | -0.17 | 0.86932 |
| SBDS       | -0.01 | 8.06  | -0.17 | 0.86933 |
| PTOV1-AS2  | 0.02  | 7.91  | 0.17  | 0.86942 |
| SRRM1      | 0.01  | 9.92  | 0.17  | 0.86943 |
| EEF1A1P17  | -0.01 | 5.26  | -0.16 | 0.86976 |
| EEF2K      | 0.01  | 7.58  | 0.16  | 0.86990 |
| AXIN2      | -0.02 | 6.97  | -0.16 | 0.87013 |
| MPP1       | -0.03 | 11.46 | -0.16 | 0.87018 |
| PDLIM1P1   | 0.02  | 5.03  | 0.16  | 0.87047 |
| VKORC1L1   | -0.01 | 7.68  | -0.16 | 0.87053 |
| DHRS12     | -0.03 | 8.31  | -0.16 | 0.87065 |
| AL118558.3 | -0.02 | 5.09  | -0.16 | 0.87068 |
| AC008014.1 | -0.02 | 5.15  | -0.16 | 0.87080 |
| ZNF592     | -0.01 | 10.77 | -0.16 | 0.87096 |
| AL359183.1 | 0.02  | 5.15  | 0.16  | 0.87114 |
| ATAD5      | -0.02 | 5.04  | -0.16 | 0.87114 |
| RXRA       | -0.02 | 12.24 | -0.16 | 0.87117 |
| LARS1      | -0.01 | 9.22  | -0.16 | 0.87129 |
| C17orf100  | -0.02 | 5.35  | -0.16 | 0.87135 |
| CCZ1       | 0.02  | 7.54  | 0.16  | 0.87139 |
| ZNF740     | -0.01 | 9.48  | -0.16 | 0.87159 |
| RIOK2      | 0.01  | 7.22  | 0.16  | 0.87163 |
| RUNDC3A    | 0.05  | 9.11  | 0.16  | 0.87167 |
| NDUFB3     | 0.02  | 8.06  | 0.16  | 0.87170 |
| IGHV3-66   | -0.03 | 6.31  | -0.16 | 0.87173 |
| OSGIN1     | -0.02 | 6.38  | -0.16 | 0.87184 |
| NAP1L3     | 0.02  | 5.33  | 0.16  | 0.87184 |
| CTNNAL1    | 0.03  | 5.81  | 0.16  | 0.87186 |
| PTMAP2     | -0.02 | 8.19  | -0.16 | 0.87205 |
| SNRNP40    | 0.01  | 9.07  | 0.16  | 0.87205 |
| ICAM4      | 0.02  | 6.90  | 0.16  | 0.87216 |
| LINC00565  | -0.02 | 6.15  | -0.16 | 0.87228 |
| PTK6       | -0.01 | 5.33  | -0.16 | 0.87233 |
| DSC2       | 0.04  | 7.44  | 0.16  | 0.87240 |
| CEP290     | -0.02 | 6.47  | -0.16 | 0.87245 |
| CERS6      | 0.01  | 7.56  | 0.16  | 0.87257 |
| SOAT2      | 0.02  | 5.12  | 0.16  | 0.87274 |
| MT-CYB     | -0.01 | 14.64 | -0.16 | 0.87280 |
| EIF2S1     | -0.01 | 8.30  | -0.16 | 0.87280 |
| EP400P1    | -0.02 | 7.28  | -0.16 | 0.87353 |

|            |       |       |       |         |
|------------|-------|-------|-------|---------|
| ZNF525     | -0.02 | 6.63  | -0.16 | 0.87357 |
| RTL5       | -0.02 | 6.56  | -0.16 | 0.87379 |
| HEXA       | -0.01 | 9.52  | -0.16 | 0.87391 |
| SH3BP4     | -0.02 | 5.85  | -0.16 | 0.87398 |
| AC092375.2 | -0.02 | 4.99  | -0.16 | 0.87399 |
| ADORA2B    | -0.02 | 5.26  | -0.16 | 0.87402 |
| AC026462.1 | -0.03 | 6.84  | -0.16 | 0.87404 |
| EML5       | -0.02 | 5.10  | -0.16 | 0.87406 |
| TPM3P9     | 0.01  | 7.07  | 0.16  | 0.87414 |
| ZNF670     | -0.02 | 5.06  | -0.16 | 0.87416 |
| HMGNI1P38  | 0.02  | 5.83  | 0.16  | 0.87422 |
| AL451165.2 | 0.02  | 5.96  | 0.16  | 0.87424 |
| TNFRSF1A   | -0.02 | 12.64 | -0.16 | 0.87434 |
| SPECC1     | -0.01 | 8.52  | -0.16 | 0.87479 |
| TRIM32     | 0.01  | 7.10  | 0.16  | 0.87487 |
| Z83745.1   | 0.02  | 5.07  | 0.16  | 0.87491 |
| EID3       | -0.01 | 5.81  | -0.16 | 0.87495 |
| OFD1       | -0.01 | 8.79  | -0.16 | 0.87514 |
| LAMTOR5    | 0.02  | 8.93  | 0.16  | 0.87517 |
| JCHAIN     | -0.05 | 8.73  | -0.16 | 0.87558 |
| CD63       | -0.02 | 11.61 | -0.16 | 0.87559 |
| AC139795.2 | 0.02  | 5.39  | 0.16  | 0.87561 |
| XCL1       | 0.04  | 6.23  | 0.16  | 0.87576 |
| MYBPH      | 0.03  | 6.41  | 0.16  | 0.87586 |
| MT-RNR1    | 0.02  | 15.51 | 0.16  | 0.87589 |
| PARP10     | -0.02 | 10.35 | -0.16 | 0.87590 |
| CFL1P2     | 0.02  | 6.99  | 0.16  | 0.87601 |
| CDKN1C     | 0.03  | 8.41  | 0.16  | 0.87607 |
| VCL        | 0.02  | 11.10 | 0.16  | 0.87615 |
| IL5RA      | -0.02 | 7.03  | -0.16 | 0.87615 |
| XKR7       | 0.02  | 5.01  | 0.16  | 0.87617 |
| SNORC      | 0.01  | 5.12  | 0.16  | 0.87624 |
| TTC39C-AS1 | 0.02  | 5.20  | 0.16  | 0.87628 |
| TRBV3-1    | 0.03  | 7.12  | 0.16  | 0.87641 |
| NINL       | 0.02  | 5.45  | 0.16  | 0.87646 |
| IFFO1      | 0.02  | 10.00 | 0.16  | 0.87681 |
| FLII       | 0.01  | 12.58 | 0.16  | 0.87691 |
| GALNT6     | -0.02 | 8.80  | -0.16 | 0.87702 |
| AL662844.4 | -0.02 | 8.37  | -0.16 | 0.87709 |
| ATP1A3     | 0.02  | 5.87  | 0.16  | 0.87710 |
| TMEM94     | 0.01  | 10.03 | 0.16  | 0.87737 |
| MT-RNR2    | -0.02 | 17.45 | -0.16 | 0.87739 |
| SLC25A37   | -0.03 | 14.49 | -0.15 | 0.87749 |
| RPL12P27   | -0.02 | 5.75  | -0.15 | 0.87767 |
| PACC1      | -0.01 | 7.06  | -0.15 | 0.87771 |
| ZNF470     | -0.01 | 5.65  | -0.15 | 0.87780 |
| HEMGN      | 0.03  | 7.59  | 0.15  | 0.87782 |
| GABPB1-IT1 | 0.01  | 7.91  | 0.15  | 0.87785 |
| CUL5       | -0.01 | 7.26  | -0.15 | 0.87802 |
| PTCD3      | -0.01 | 8.46  | -0.15 | 0.87813 |

|            |       |       |       |         |
|------------|-------|-------|-------|---------|
| GPR137B    | -0.01 | 7.25  | -0.15 | 0.87815 |
| ITGAL      | 0.01  | 13.45 | 0.15  | 0.87825 |
| MCOLN2     | -0.02 | 6.78  | -0.15 | 0.87831 |
| CASP9      | 0.01  | 8.23  | 0.15  | 0.87838 |
| PSME3IP1   | 0.01  | 10.39 | 0.15  | 0.87864 |
| ACTBP11    | 0.02  | 7.03  | 0.15  | 0.87871 |
| PTPRK      | 0.02  | 5.36  | 0.15  | 0.87909 |
| ENO3       | -0.02 | 7.04  | -0.15 | 0.87923 |
| AL589843.2 | 0.02  | 5.29  | 0.15  | 0.87939 |
| SCOC       | -0.01 | 6.68  | -0.15 | 0.87958 |
| LYNX1      | -0.03 | 6.63  | -0.15 | 0.87971 |
| RPL4P3     | -0.02 | 5.90  | -0.15 | 0.87983 |
| TMSB4XP8   | -0.02 | 10.83 | -0.15 | 0.87989 |
| ANGEL1     | -0.01 | 7.94  | -0.15 | 0.87993 |
| PHETA2     | 0.02  | 6.43  | 0.15  | 0.87996 |
| THAP2      | -0.02 | 5.63  | -0.15 | 0.88002 |
| AC010618.3 | 0.01  | 5.20  | 0.15  | 0.88003 |
| ZNF503     | -0.02 | 5.49  | -0.15 | 0.88019 |
| ZNF320     | -0.01 | 6.94  | -0.15 | 0.88041 |
| BMS1       | -0.01 | 8.89  | -0.15 | 0.88043 |
| SPRYD4     | 0.02  | 6.58  | 0.15  | 0.88047 |
| OPLAH      | 0.03  | 6.77  | 0.15  | 0.88051 |
| HNRNPA1P12 | -0.01 | 4.99  | -0.15 | 0.88063 |
| FTH1P5     | 0.02  | 7.46  | 0.15  | 0.88070 |
| ZNF121     | -0.01 | 7.68  | -0.15 | 0.88084 |
| SPC24      | -0.02 | 5.04  | -0.15 | 0.88088 |
| IGLV1-40   | -0.04 | 7.90  | -0.15 | 0.88096 |
| CEBPD      | -0.03 | 10.52 | -0.15 | 0.88105 |
| NSUN5P1    | -0.03 | 8.99  | -0.15 | 0.88114 |
| AP002954.1 | 0.03  | 5.55  | 0.15  | 0.88116 |
| RPL30P3    | -0.02 | 5.92  | -0.15 | 0.88126 |
| DPH2       | 0.01  | 8.06  | 0.15  | 0.88143 |
| SSPO       | 0.02  | 5.69  | 0.15  | 0.88153 |
| AC099796.1 | 0.02  | 6.00  | 0.15  | 0.88196 |
| TRIT1      | 0.01  | 7.14  | 0.15  | 0.88200 |
| MVB12B     | -0.01 | 7.72  | -0.15 | 0.88204 |
| MED24      | 0.01  | 9.93  | 0.15  | 0.88206 |
| SPATA20    | 0.02  | 8.62  | 0.15  | 0.88210 |
| IPO9       | -0.01 | 8.93  | -0.15 | 0.88216 |
| SLC4A1APP1 | 0.01  | 4.94  | 0.15  | 0.88225 |
| TMSB4XP1   | 0.02  | 6.55  | 0.15  | 0.88236 |
| NHLRC1     | 0.02  | 5.33  | 0.15  | 0.88244 |
| RAB11FIP4  | 0.01  | 10.62 | 0.15  | 0.88278 |
| AC040970.1 | 0.02  | 6.79  | 0.15  | 0.88280 |
| SNHG12     | -0.02 | 7.70  | -0.15 | 0.88289 |
| CLHC1      | -0.02 | 5.21  | -0.15 | 0.88316 |
| MRPS25     | 0.01  | 8.48  | 0.15  | 0.88318 |
| INKA2-AS1  | 0.02  | 5.81  | 0.15  | 0.88324 |
| BCAR3      | 0.02  | 5.46  | 0.15  | 0.88324 |
| DNMT1      | 0.01  | 10.49 | 0.15  | 0.88351 |

|            |       |       |       |         |
|------------|-------|-------|-------|---------|
| ATG5       | -0.01 | 7.97  | -0.15 | 0.88365 |
| RPL5P23    | -0.02 | 6.90  | -0.15 | 0.88384 |
| MROH6      | 0.02  | 7.58  | 0.15  | 0.88396 |
| AC091982.2 | -0.02 | 5.07  | -0.15 | 0.88405 |
| TMEM230    | -0.01 | 9.17  | -0.15 | 0.88414 |
| C3orf86    | 0.03  | 8.15  | 0.15  | 0.88425 |
| CD101      | -0.02 | 8.96  | -0.15 | 0.88456 |
| AC104117.2 | -0.02 | 5.80  | -0.15 | 0.88485 |
| MLC1       | -0.02 | 8.74  | -0.15 | 0.88501 |
| GTSE1      | -0.02 | 5.34  | -0.15 | 0.88505 |
| IGHV1-69D  | -0.04 | 6.86  | -0.15 | 0.88522 |
| HLA-F      | 0.01  | 12.87 | 0.14  | 0.88542 |
| TRIM35     | -0.01 | 8.29  | -0.14 | 0.88555 |
| PAQR4      | -0.02 | 7.16  | -0.14 | 0.88556 |
| KCNN4      | 0.02  | 8.58  | 0.14  | 0.88560 |
| ZNF814     | 0.02  | 6.63  | 0.14  | 0.88561 |
| MT-TE      | -0.01 | 5.09  | -0.14 | 0.88561 |
| AC079922.2 | 0.01  | 6.48  | 0.14  | 0.88569 |
| MTFR1      | 0.01  | 5.78  | 0.14  | 0.88576 |
| AC129492.5 | 0.01  | 5.05  | 0.14  | 0.88585 |
| CEBPA      | -0.02 | 9.61  | -0.14 | 0.88593 |
| FBXO21     | -0.01 | 7.97  | -0.14 | 0.88606 |
| AGA        | -0.01 | 7.18  | -0.14 | 0.88608 |
| FHOD1      | -0.01 | 9.91  | -0.14 | 0.88624 |
| CEP152     | -0.01 | 6.38  | -0.14 | 0.88633 |
| FOXN3      | -0.01 | 10.24 | -0.14 | 0.88635 |
| C1QC       | 0.02  | 5.36  | 0.14  | 0.88640 |
| CSNK1G2P1  | -0.01 | 5.10  | -0.14 | 0.88651 |
| SDSL       | -0.02 | 6.25  | -0.14 | 0.88666 |
| GSEC       | -0.03 | 6.80  | -0.14 | 0.88693 |
| FDPSP1     | -0.02 | 5.08  | -0.14 | 0.88694 |
| LCMT2      | -0.01 | 6.79  | -0.14 | 0.88708 |
| RARA-AS1   | -0.02 | 7.38  | -0.14 | 0.88722 |
| AC009022.1 | -0.02 | 5.47  | -0.14 | 0.88730 |
| CEP41      | -0.01 | 6.83  | -0.14 | 0.88734 |
| AMBRA1     | 0.01  | 9.29  | 0.14  | 0.88770 |
| SUB1       | 0.01  | 9.71  | 0.14  | 0.88786 |
| MYLK-AS1   | 0.01  | 4.98  | 0.14  | 0.88787 |
| CTTN       | 0.02  | 8.41  | 0.14  | 0.88788 |
| SRP72      | 0.01  | 9.30  | 0.14  | 0.88798 |
| SLC37A2    | -0.02 | 9.26  | -0.14 | 0.88800 |
| TTY14      | -0.03 | 4.98  | -0.14 | 0.88807 |
| AL133444.1 | 0.02  | 5.22  | 0.14  | 0.88811 |
| S100A8     | -0.03 | 14.88 | -0.14 | 0.88829 |
| FCN1       | 0.02  | 14.72 | 0.14  | 0.88836 |
| SAMD12     | -0.02 | 5.03  | -0.14 | 0.88836 |
| PIK3R3     | 0.02  | 5.96  | 0.14  | 0.88843 |
| MID1IP1    | 0.01  | 10.31 | 0.14  | 0.88849 |
| SCAF4      | 0.01  | 9.34  | 0.14  | 0.88891 |
| YRDC       | -0.01 | 6.95  | -0.14 | 0.88893 |

|            |       |       |       |         |
|------------|-------|-------|-------|---------|
| RFC4       | -0.01 | 6.32  | -0.14 | 0.88909 |
| MOC53      | 0.01  | 6.95  | 0.14  | 0.88932 |
| CDC20      | 0.02  | 5.79  | 0.14  | 0.88959 |
| AL135818.1 | -0.01 | 6.86  | -0.14 | 0.88962 |
| IFT74      | -0.01 | 5.74  | -0.14 | 0.88968 |
| DNASE1L2   | 0.02  | 5.56  | 0.14  | 0.88984 |
| ZNF880     | 0.01  | 6.34  | 0.14  | 0.88989 |
| REXO5      | 0.01  | 5.26  | 0.14  | 0.89000 |
| MID2       | 0.02  | 5.50  | 0.14  | 0.89005 |
| ARL17B     | -0.03 | 5.76  | -0.14 | 0.89019 |
| JAZF1      | 0.02  | 9.19  | 0.14  | 0.89026 |
| ROPN1L     | 0.03  | 7.28  | 0.14  | 0.89034 |
| TUBBP5     | -0.02 | 5.13  | -0.14 | 0.89048 |
| RALGPS2    | -0.02 | 7.90  | -0.14 | 0.89061 |
| KHSRPP1    | -0.02 | 5.18  | -0.14 | 0.89076 |
| AC004943.2 | 0.01  | 5.22  | 0.14  | 0.89079 |
| ARHGAP6    | -0.02 | 5.64  | -0.14 | 0.89083 |
| TKT        | 0.01  | 13.92 | 0.14  | 0.89090 |
| ZNF16      | -0.01 | 6.76  | -0.14 | 0.89119 |
| DCAF12     | 0.03  | 11.35 | 0.14  | 0.89120 |
| BPGM       | -0.03 | 8.26  | -0.14 | 0.89130 |
| CCDC136    | 0.01  | 5.97  | 0.14  | 0.89149 |
| ZNF467     | 0.02  | 10.71 | 0.14  | 0.89150 |
| B3GNTL1    | 0.02  | 9.01  | 0.14  | 0.89166 |
| IFT122     | -0.01 | 8.07  | -0.14 | 0.89175 |
| CKAP4      | 0.02  | 10.63 | 0.14  | 0.89183 |
| AL354714.2 | -0.02 | 5.48  | -0.14 | 0.89197 |
| SPAG8      | 0.01  | 5.42  | 0.14  | 0.89206 |
| FIG4       | -0.01 | 8.57  | -0.14 | 0.89208 |
| CCDC191    | -0.01 | 6.46  | -0.14 | 0.89211 |
| VASP       | 0.02  | 12.47 | 0.14  | 0.89213 |
| MRPL13     | -0.01 | 7.23  | -0.14 | 0.89220 |
| GRPEL2     | -0.01 | 6.93  | -0.14 | 0.89225 |
| AMIGO2     | -0.01 | 6.89  | -0.14 | 0.89227 |
| DNAJC5     | 0.01  | 11.60 | 0.14  | 0.89228 |
| AC018755.5 | -0.02 | 5.06  | -0.14 | 0.89294 |
| AC093227.1 | 0.02  | 5.04  | 0.14  | 0.89303 |
| VAPA       | -0.01 | 9.64  | -0.14 | 0.89311 |
| DCP1B      | 0.01  | 7.70  | 0.13  | 0.89376 |
| AC138150.2 | -0.02 | 6.20  | -0.13 | 0.89377 |
| TIMM10     | -0.02 | 7.96  | -0.13 | 0.89379 |
| EIF2B3     | 0.01  | 7.39  | 0.13  | 0.89401 |
| MAPKAPK2   | 0.01  | 11.50 | 0.13  | 0.89408 |
| CEACAM6    | 0.04  | 5.83  | 0.13  | 0.89430 |
| LETM1      | -0.01 | 8.94  | -0.13 | 0.89437 |
| AL365361.1 | -0.01 | 7.70  | -0.13 | 0.89455 |
| RRP36      | 0.01  | 8.86  | 0.13  | 0.89457 |
| LINC00672  | 0.02  | 5.94  | 0.13  | 0.89467 |
| RPL10P9    | -0.04 | 10.19 | -0.13 | 0.89467 |
| SSB        | 0.01  | 8.99  | 0.13  | 0.89470 |

|            |       |       |       |         |
|------------|-------|-------|-------|---------|
| VIPAS39    | 0.01  | 8.41  | 0.13  | 0.89485 |
| PBX1       | -0.02 | 6.95  | -0.13 | 0.89488 |
| GPR15      | 0.03  | 5.68  | 0.13  | 0.89504 |
| CNOT4      | -0.01 | 7.65  | -0.13 | 0.89533 |
| EA2F       | 0.02  | 6.36  | 0.13  | 0.89563 |
| MOAP1      | 0.01  | 9.00  | 0.13  | 0.89573 |
| PSME2P2    | -0.02 | 6.64  | -0.13 | 0.89580 |
| GNPNAT1    | 0.01  | 6.54  | 0.13  | 0.89603 |
| AC127502.1 | 0.02  | 5.03  | 0.13  | 0.89611 |
| ILF2P1     | 0.01  | 5.12  | 0.13  | 0.89651 |
| INSR       | 0.02  | 7.57  | 0.13  | 0.89653 |
| TSPYL1     | 0.01  | 9.80  | 0.13  | 0.89659 |
| AC008537.3 | 0.01  | 5.09  | 0.13  | 0.89678 |
| ALDH5A1    | -0.02 | 7.43  | -0.13 | 0.89719 |
| ZP3        | 0.02  | 6.13  | 0.13  | 0.89731 |
| TSPYL5     | 0.02  | 5.50  | 0.13  | 0.89731 |
| AL356968.2 | 0.03  | 6.04  | 0.13  | 0.89734 |
| RPS26P8    | 0.03  | 6.73  | 0.13  | 0.89739 |
| CAND2      | 0.02  | 5.25  | 0.13  | 0.89762 |
| ZC3H4      | -0.01 | 9.73  | -0.13 | 0.89763 |
| AP002748.4 | 0.01  | 5.76  | 0.13  | 0.89781 |
| AC124068.1 | -0.02 | 5.28  | -0.13 | 0.89785 |
| LOXL1      | -0.02 | 5.22  | -0.13 | 0.89788 |
| ZNF273     | -0.01 | 5.49  | -0.13 | 0.89796 |
| PRPF4      | 0.01  | 8.82  | 0.13  | 0.89796 |
| TAF9       | -0.01 | 8.11  | -0.13 | 0.89815 |
| CCR9       | -0.02 | 5.68  | -0.13 | 0.89820 |
| PLGRKT     | 0.01  | 6.85  | 0.13  | 0.89827 |
| ECHDC3     | 0.02  | 6.76  | 0.13  | 0.89829 |
| PTPRA      | 0.01  | 10.03 | 0.13  | 0.89831 |
| WASH8P     | 0.03  | 8.62  | 0.13  | 0.89832 |
| CFL1P4     | -0.01 | 5.70  | -0.13 | 0.89836 |
| TEF        | -0.01 | 7.59  | -0.13 | 0.89850 |
| CATIP-AS1  | -0.02 | 5.42  | -0.13 | 0.89850 |
| NINJ1      | -0.02 | 11.69 | -0.13 | 0.89860 |
| SNHG10     | 0.02  | 5.85  | 0.13  | 0.89874 |
| PCGF1      | 0.01  | 7.91  | 0.13  | 0.89896 |
| EFCAB2     | -0.02 | 6.18  | -0.13 | 0.89901 |
| TTC16      | 0.02  | 8.04  | 0.13  | 0.89906 |
| PPM1B      | -0.01 | 8.54  | -0.13 | 0.89912 |
| SPATA2L    | 0.01  | 7.10  | 0.13  | 0.89912 |
| POLR3E     | -0.01 | 8.61  | -0.13 | 0.89914 |
| FAM217B    | -0.01 | 8.47  | -0.13 | 0.89921 |
| AC080112.5 | 0.02  | 5.20  | 0.13  | 0.89932 |
| CCT6P3     | 0.02  | 5.99  | 0.13  | 0.89939 |
| CLEC18A    | -0.02 | 5.11  | -0.13 | 0.89945 |
| RNASE1     | 0.03  | 5.25  | 0.13  | 0.89992 |
| CDKN2AIPNL | -0.01 | 6.99  | -0.13 | 0.89997 |
| CNTNAP1    | -0.02 | 6.45  | -0.13 | 0.90004 |
| RNF41      | -0.01 | 9.25  | -0.13 | 0.90011 |

|            |       |       |       |         |
|------------|-------|-------|-------|---------|
| HNRNPUL1   | 0.01  | 11.94 | 0.13  | 0.90025 |
| JUN        | 0.01  | 7.72  | 0.13  | 0.90043 |
| AC012020.1 | 0.01  | 5.98  | 0.13  | 0.90049 |
| DLGAP3     | -0.01 | 5.22  | -0.13 | 0.90050 |
| EXO5       | -0.01 | 6.96  | -0.13 | 0.90050 |
| AC090616.6 | 0.01  | 5.34  | 0.13  | 0.90054 |
| SIGLEC6    | 0.02  | 5.20  | 0.13  | 0.90061 |
| SLC49A3    | -0.01 | 7.34  | -0.13 | 0.90062 |
| GRHL1      | -0.01 | 5.10  | -0.13 | 0.90063 |
| EFHC1      | 0.02  | 6.15  | 0.13  | 0.90070 |
| TLR10      | 0.02  | 7.38  | 0.13  | 0.90086 |
| MAIP1      | -0.01 | 6.36  | -0.13 | 0.90090 |
| YIPF3      | 0.01  | 11.11 | 0.13  | 0.90095 |
| PRPF38A    | -0.01 | 9.13  | -0.12 | 0.90104 |
| RNF208     | -0.02 | 6.24  | -0.12 | 0.90116 |
| SEC11A     | -0.01 | 10.02 | -0.12 | 0.90119 |
| TENT4B     | 0.01  | 7.34  | 0.12  | 0.90123 |
| SPTA1      | -0.02 | 5.57  | -0.12 | 0.90129 |
| ZFP90      | 0.01  | 8.16  | 0.12  | 0.90158 |
| FAM204A    | -0.01 | 7.93  | -0.12 | 0.90161 |
| AL049830.1 | 0.01  | 5.24  | 0.12  | 0.90169 |
| ST20-AS1   | 0.02  | 6.35  | 0.12  | 0.90171 |
| CCDC84     | -0.02 | 8.44  | -0.12 | 0.90195 |
| AC006001.2 | 0.02  | 5.23  | 0.12  | 0.90196 |
| AIG1       | 0.01  | 7.10  | 0.12  | 0.90197 |
| KLRA1P     | -0.02 | 5.37  | -0.12 | 0.90218 |
| AC007041.1 | -0.01 | 5.07  | -0.12 | 0.90219 |
| EIF4A1P10  | -0.02 | 7.82  | -0.12 | 0.90220 |
| GALNT14    | -0.02 | 6.35  | -0.12 | 0.90229 |
| EIF1P3     | 0.01  | 6.70  | 0.12  | 0.90247 |
| GALK2      | 0.01  | 7.26  | 0.12  | 0.90270 |
| SPDYC      | -0.03 | 5.19  | -0.12 | 0.90280 |
| TRAV24     | 0.02  | 5.25  | 0.12  | 0.90282 |
| RBM12B     | -0.01 | 6.82  | -0.12 | 0.90318 |
| B3GAT1     | -0.02 | 7.64  | -0.12 | 0.90324 |
| IQCH-AS1   | -0.01 | 5.77  | -0.12 | 0.90341 |
| WWC1       | -0.01 | 5.09  | -0.12 | 0.90376 |
| ZNF549     | -0.01 | 6.83  | -0.12 | 0.90387 |
| ZWINT      | -0.01 | 5.61  | -0.12 | 0.90393 |
| CBLN3      | 0.02  | 5.81  | 0.12  | 0.90398 |
| HIC1       | 0.01  | 6.18  | 0.12  | 0.90409 |
| TBC1D27P   | 0.02  | 6.12  | 0.12  | 0.90411 |
| AC073063.1 | -0.01 | 5.93  | -0.12 | 0.90422 |
| MARK3      | 0.01  | 10.66 | 0.12  | 0.90426 |
| AC004951.2 | -0.01 | 5.44  | -0.12 | 0.90438 |
| SUB1P1     | 0.01  | 5.99  | 0.12  | 0.90454 |
| PRUNE1     | -0.01 | 8.43  | -0.12 | 0.90483 |
| DPF2       | 0.01  | 10.60 | 0.12  | 0.90497 |
| CACYBP     | -0.01 | 8.57  | -0.12 | 0.90514 |
| EIF4E2     | 0.01  | 9.97  | 0.12  | 0.90522 |



|            |       |       |       |         |
|------------|-------|-------|-------|---------|
| TACC1      | -0.01 | 10.48 | -0.12 | 0.90539 |
| DLX4       | -0.01 | 4.92  | -0.12 | 0.90544 |
| HSDL1      | -0.01 | 7.73  | -0.12 | 0.90559 |
| MYO1F      | 0.01  | 14.76 | 0.12  | 0.90570 |
| PSMB5      | -0.01 | 8.61  | -0.12 | 0.90576 |
| TRMT44     | 0.01  | 7.11  | 0.12  | 0.90594 |
| BCAS2      | 0.01  | 7.80  | 0.12  | 0.90598 |
| AP001189.1 | 0.03  | 8.82  | 0.12  | 0.90633 |
| MANEAL     | -0.01 | 6.03  | -0.12 | 0.90655 |
| AC087499.4 | -0.01 | 5.11  | -0.12 | 0.90684 |
| AC133552.2 | 0.01  | 5.20  | 0.12  | 0.90684 |
| AL132780.4 | 0.02  | 4.97  | 0.12  | 0.90687 |
| ZNF699     | -0.01 | 6.25  | -0.12 | 0.90691 |
| TAF10      | -0.01 | 6.79  | -0.12 | 0.90694 |
| AC020909.2 | -0.02 | 5.23  | -0.12 | 0.90702 |
| SV2A       | 0.01  | 6.16  | 0.12  | 0.90721 |
| LDHA       | -0.01 | 10.90 | -0.12 | 0.90725 |
| AC007566.1 | 0.01  | 5.30  | 0.12  | 0.90736 |
| KCNQ5      | -0.01 | 5.18  | -0.12 | 0.90741 |
| KPNA2      | -0.01 | 7.91  | -0.12 | 0.90742 |
| AC108479.1 | 0.01  | 5.11  | 0.12  | 0.90764 |
| MIATNB     | 0.01  | 7.54  | 0.12  | 0.90766 |
| ZNF616     | -0.01 | 6.25  | -0.12 | 0.90797 |
| PSMA2P3    | -0.01 | 5.60  | -0.12 | 0.90806 |
| SIK1B      | -0.02 | 5.46  | -0.12 | 0.90822 |
| OXSM       | 0.01  | 6.41  | 0.12  | 0.90826 |
| ARF3       | 0.01  | 10.89 | 0.12  | 0.90828 |
| IPO5       | 0.01  | 9.38  | 0.12  | 0.90829 |
| MBOAT7     | -0.02 | 13.06 | -0.12 | 0.90832 |
| SEPHS2     | -0.01 | 9.76  | -0.12 | 0.90836 |
| RAB19      | 0.02  | 5.31  | 0.12  | 0.90839 |
| GANAB      | -0.01 | 11.89 | -0.12 | 0.90845 |
| TRAV29DV5  | -0.01 | 6.67  | -0.12 | 0.90848 |
| HSPA8P5    | -0.02 | 6.99  | -0.12 | 0.90875 |
| AC099343.5 | 0.01  | 5.13  | 0.12  | 0.90877 |
| RHBDD1     | 0.01  | 7.87  | 0.11  | 0.90907 |
| FSTL3      | -0.01 | 6.43  | -0.11 | 0.90908 |
| EFCAB8     | 0.02  | 5.14  | 0.11  | 0.90920 |
| GZMA       | 0.02  | 10.69 | 0.11  | 0.90925 |
| SLC43A3    | -0.01 | 8.56  | -0.11 | 0.90932 |
| ST13P6     | -0.01 | 5.61  | -0.11 | 0.90938 |
| AC021078.1 | -0.01 | 6.09  | -0.11 | 0.90938 |
| GLB1L      | -0.02 | 6.34  | -0.11 | 0.90950 |
| DYNC2LI1   | 0.01  | 5.40  | 0.11  | 0.90958 |
| TMEM164    | 0.01  | 10.51 | 0.11  | 0.90962 |
| MT2A       | -0.03 | 9.47  | -0.11 | 0.90965 |
| ZNF512     | -0.01 | 7.76  | -0.11 | 0.90976 |
| DEFA1B     | 0.04  | 7.50  | 0.11  | 0.90995 |
| UTP14A     | -0.01 | 8.27  | -0.11 | 0.91007 |
| COPG1      | -0.01 | 10.87 | -0.11 | 0.91026 |

|            |       |       |       |         |
|------------|-------|-------|-------|---------|
| AC083799.1 | -0.02 | 7.10  | -0.11 | 0.91038 |
| UXS1       | -0.01 | 9.07  | -0.11 | 0.91043 |
| HSPB11     | -0.01 | 6.75  | -0.11 | 0.91043 |
| AC092809.4 | -0.01 | 5.51  | -0.11 | 0.91046 |
| ETV2       | -0.01 | 4.95  | -0.11 | 0.91062 |
| DGKK       | 0.02  | 5.64  | 0.11  | 0.91071 |
| ACAA2      | -0.01 | 9.02  | -0.11 | 0.91077 |
| VWCE       | -0.03 | 8.40  | -0.11 | 0.91077 |
| PPP1R18    | -0.01 | 12.79 | -0.11 | 0.91080 |
| ADGRG5     | 0.01  | 8.94  | 0.11  | 0.91085 |
| HNRNPA1P10 | 0.01  | 7.47  | 0.11  | 0.91127 |
| ZNF582-AS1 | -0.01 | 5.24  | -0.11 | 0.91128 |
| ANXA2      | 0.01  | 12.32 | 0.11  | 0.91128 |
| MT1E       | 0.02  | 5.87  | 0.11  | 0.91131 |
| TRIM8      | -0.01 | 10.91 | -0.11 | 0.91136 |
| TBC1D24    | 0.01  | 6.74  | 0.11  | 0.91136 |
| ABHD17C    | -0.01 | 5.79  | -0.11 | 0.91137 |
| AKNA       | 0.01  | 12.99 | 0.11  | 0.91140 |
| TGM2       | -0.02 | 7.27  | -0.11 | 0.91147 |
| RCAN1      | -0.01 | 7.26  | -0.11 | 0.91151 |
| TXN        | 0.02  | 9.82  | 0.11  | 0.91166 |
| VPS33A     | -0.01 | 8.00  | -0.11 | 0.91169 |
| FGGY       | -0.01 | 5.98  | -0.11 | 0.91180 |
| MAEA       | -0.01 | 10.55 | -0.11 | 0.91193 |
| PTGR2      | -0.01 | 5.20  | -0.11 | 0.91195 |
| PCYT1B     | -0.01 | 5.57  | -0.11 | 0.91203 |
| FAM219A    | -0.01 | 8.38  | -0.11 | 0.91220 |
| SPIN2B     | 0.01  | 5.57  | 0.11  | 0.91228 |
| ACSS1      | -0.01 | 10.18 | -0.11 | 0.91231 |
| DHRX       | -0.01 | 8.07  | -0.11 | 0.91239 |
| CCL4L2     | -0.02 | 6.33  | -0.11 | 0.91250 |
| IGHMBP2    | 0.01  | 8.37  | 0.11  | 0.91256 |
| AC084125.2 | 0.01  | 5.34  | 0.11  | 0.91259 |
| CALHM2     | -0.01 | 10.10 | -0.11 | 0.91261 |
| CACNA1F    | 0.01  | 5.39  | 0.11  | 0.91268 |
| CCNB1      | 0.01  | 5.84  | 0.11  | 0.91268 |
| NOTCH4     | -0.01 | 6.04  | -0.11 | 0.91269 |
| STK32C     | 0.01  | 7.99  | 0.11  | 0.91279 |
| ALOX15     | -0.03 | 7.21  | -0.11 | 0.91292 |
| NAF1       | -0.01 | 5.78  | -0.11 | 0.91293 |
| AL162586.1 | -0.02 | 6.16  | -0.11 | 0.91295 |
| BAZ1B      | -0.01 | 10.01 | -0.11 | 0.91304 |
| NPIP2      | -0.01 | 5.85  | -0.11 | 0.91326 |
| MPP6       | 0.02  | 5.96  | 0.11  | 0.91333 |
| AC004069.1 | 0.01  | 5.76  | 0.11  | 0.91340 |
| TEX261     | 0.01  | 9.97  | 0.11  | 0.91346 |
| GP5        | -0.02 | 5.70  | -0.11 | 0.91351 |
| ERBB2      | 0.01  | 8.23  | 0.11  | 0.91367 |
| HSD17B12   | -0.01 | 7.24  | -0.11 | 0.91369 |
| SLC39A14   | 0.01  | 6.41  | 0.11  | 0.91384 |

|             |       |       |       |         |
|-------------|-------|-------|-------|---------|
| HLA-C       | 0.01  | 16.41 | 0.11  | 0.91394 |
| MINCR       | -0.01 | 5.74  | -0.11 | 0.91399 |
| DNASE1L1    | -0.01 | 9.67  | -0.11 | 0.91400 |
| B9D1        | -0.01 | 5.10  | -0.11 | 0.91401 |
| ZSCAN18     | -0.01 | 8.36  | -0.11 | 0.91425 |
| ATXN7L1     | -0.01 | 7.92  | -0.11 | 0.91429 |
| CACNA1C-AS2 | 0.01  | 5.71  | 0.11  | 0.91445 |
| ACSBG1      | 0.02  | 5.38  | 0.11  | 0.91452 |
| TLNRD1      | -0.01 | 8.78  | -0.11 | 0.91472 |
| CYTH4       | 0.01  | 13.01 | 0.11  | 0.91488 |
| ELOA-AS1    | 0.01  | 6.13  | 0.11  | 0.91497 |
| HADHAP1     | -0.01 | 5.71  | -0.11 | 0.91498 |
| HSPA1B      | 0.01  | 7.91  | 0.11  | 0.91499 |
| ZDHHC14     | -0.01 | 6.85  | -0.11 | 0.91504 |
| MOK         | -0.01 | 5.39  | -0.11 | 0.91506 |
| GGACT       | 0.01  | 6.07  | 0.11  | 0.91510 |
| PIGH        | 0.01  | 6.81  | 0.11  | 0.91528 |
| PROSER3     | 0.01  | 7.44  | 0.11  | 0.91534 |
| WDYHV1      | -0.01 | 6.07  | -0.11 | 0.91545 |
| PRMT6       | 0.01  | 6.86  | 0.11  | 0.91545 |
| LINS1       | -0.01 | 7.47  | -0.11 | 0.91554 |
| AC002524.1  | -0.01 | 5.14  | -0.11 | 0.91561 |
| DSN1        | 0.01  | 7.04  | 0.11  | 0.91568 |
| LINC00899   | -0.01 | 6.46  | -0.11 | 0.91571 |
| H2AZ1       | -0.01 | 10.84 | -0.11 | 0.91582 |
| ARMCX2      | 0.01  | 5.80  | 0.11  | 0.91589 |
| HYPK        | 0.02  | 5.66  | 0.11  | 0.91600 |
| NDUFB4P12   | 0.01  | 5.37  | 0.11  | 0.91601 |
| TIMM21      | -0.01 | 6.86  | -0.11 | 0.91604 |
| WDTC1       | 0.01  | 11.77 | 0.11  | 0.91604 |
| IGLV2-8     | -0.02 | 7.58  | -0.11 | 0.91627 |
| SLC2A13     | -0.01 | 5.06  | -0.11 | 0.91629 |
| RASSF1      | -0.01 | 10.67 | -0.11 | 0.91644 |
| AC025171.5  | 0.01  | 5.56  | 0.11  | 0.91654 |
| C18orf21    | -0.01 | 7.15  | -0.11 | 0.91673 |
| JOSD1       | -0.01 | 9.39  | -0.10 | 0.91699 |
| NUP93       | -0.01 | 9.37  | -0.10 | 0.91714 |
| MKKS        | -0.01 | 7.74  | -0.10 | 0.91732 |
| SPAG5-AS1   | 0.01  | 5.07  | 0.10  | 0.91758 |
| GSTM2       | 0.02  | 7.40  | 0.10  | 0.91762 |
| UPP1        | -0.01 | 10.04 | -0.10 | 0.91780 |
| MCUR1       | -0.01 | 7.38  | -0.10 | 0.91784 |
| STAC3       | -0.01 | 8.02  | -0.10 | 0.91791 |
| DCAF17      | 0.01  | 6.56  | 0.10  | 0.91793 |
| SLCO4A1     | -0.02 | 4.97  | -0.10 | 0.91795 |
| ZNF252P     | -0.01 | 7.23  | -0.10 | 0.91796 |
| SREBF2      | 0.01  | 10.35 | 0.10  | 0.91813 |
| RPS26       | 0.04  | 11.83 | 0.10  | 0.91832 |
| DYRK2       | 0.01  | 9.09  | 0.10  | 0.91835 |
| ASF1B       | -0.01 | 8.33  | -0.10 | 0.91860 |

|            |       |       |       |         |
|------------|-------|-------|-------|---------|
| WASH7P     | -0.01 | 5.53  | -0.10 | 0.91860 |
| STAT4      | -0.01 | 9.27  | -0.10 | 0.91865 |
| ZNF780B    | -0.01 | 6.73  | -0.10 | 0.91879 |
| GRM2       | 0.01  | 4.95  | 0.10  | 0.91881 |
| AHDC1      | 0.01  | 8.04  | 0.10  | 0.91882 |
| OARD1      | 0.01  | 8.07  | 0.10  | 0.91889 |
| EXOC4      | 0.01  | 9.09  | 0.10  | 0.91892 |
| MAPK13     | -0.01 | 10.09 | -0.10 | 0.91892 |
| RPF2       | -0.01 | 7.03  | -0.10 | 0.91896 |
| PPP1R2     | 0.01  | 9.07  | 0.10  | 0.91938 |
| KRT8P12    | -0.01 | 6.65  | -0.10 | 0.91944 |
| BOD1       | -0.01 | 7.44  | -0.10 | 0.91947 |
| RCN3       | 0.02  | 9.16  | 0.10  | 0.91961 |
| ATG13      | 0.01  | 10.81 | 0.10  | 0.91983 |
| RAB37      | -0.01 | 11.33 | -0.10 | 0.91987 |
| AGO3       | 0.01  | 7.75  | 0.10  | 0.91996 |
| DNHD1      | 0.02  | 8.09  | 0.10  | 0.92027 |
| PUS7L      | 0.01  | 6.39  | 0.10  | 0.92029 |
| TRAT1      | 0.01  | 7.51  | 0.10  | 0.92041 |
| MHENCN     | -0.01 | 8.02  | -0.10 | 0.92049 |
| MCPH1-AS1  | -0.01 | 5.01  | -0.10 | 0.92057 |
| TRAF3      | -0.01 | 9.30  | -0.10 | 0.92062 |
| MCPH1      | 0.01  | 7.43  | 0.10  | 0.92070 |
| FAM157B    | 0.02  | 5.52  | 0.10  | 0.92084 |
| NADSYN1    | 0.01  | 10.85 | 0.10  | 0.92091 |
| ZFYVE21    | -0.01 | 7.80  | -0.10 | 0.92110 |
| NLRP6      | -0.02 | 8.45  | -0.10 | 0.92169 |
| ZPR1       | -0.01 | 8.87  | -0.10 | 0.92193 |
| ZNF502     | -0.01 | 5.54  | -0.10 | 0.92203 |
| LEO1       | -0.01 | 7.74  | -0.10 | 0.92251 |
| C15orf39   | -0.01 | 12.03 | -0.10 | 0.92254 |
| UBBP2      | 0.02  | 5.55  | 0.10  | 0.92261 |
| FHL2       | 0.01  | 5.57  | 0.10  | 0.92268 |
| ARF1       | 0.01  | 12.83 | 0.10  | 0.92284 |
| ORM2       | 0.02  | 5.20  | 0.10  | 0.92341 |
| C22orf39   | 0.01  | 8.73  | 0.10  | 0.92342 |
| MPRIIP     | 0.01  | 10.39 | 0.10  | 0.92354 |
| AC018638.2 | 0.01  | 7.29  | 0.10  | 0.92358 |
| KCNK7      | -0.01 | 5.57  | -0.10 | 0.92371 |
| BTF3P7     | 0.01  | 5.30  | 0.10  | 0.92388 |
| IGHV3-21   | 0.02  | 7.34  | 0.10  | 0.92401 |
| TRAV25     | 0.01  | 5.42  | 0.10  | 0.92403 |
| POLR3F     | 0.01  | 6.55  | 0.10  | 0.92422 |
| SLC9A1     | -0.01 | 10.16 | -0.10 | 0.92435 |
| LY96       | -0.02 | 8.01  | -0.10 | 0.92435 |
| C4orf3     | -0.01 | 10.38 | -0.10 | 0.92437 |
| AGER       | -0.01 | 9.66  | -0.10 | 0.92454 |
| APH1B      | -0.01 | 8.18  | -0.10 | 0.92466 |
| SLC35A2    | -0.01 | 8.31  | -0.09 | 0.92482 |
| COX7B      | -0.01 | 9.08  | -0.09 | 0.92485 |

|            |       |       |       |         |
|------------|-------|-------|-------|---------|
| AC099343.4 | 0.01  | 6.58  | 0.09  | 0.92499 |
| CIPC       | -0.01 | 6.77  | -0.09 | 0.92509 |
| SLC25A53   | -0.01 | 6.50  | -0.09 | 0.92517 |
| AMN        | -0.01 | 5.47  | -0.09 | 0.92528 |
| AP000547.3 | 0.02  | 7.05  | 0.09  | 0.92529 |
| IMPDH1P5   | -0.01 | 5.79  | -0.09 | 0.92531 |
| AL928654.4 | 0.01  | 5.04  | 0.09  | 0.92551 |
| LINC01871  | 0.02  | 7.78  | 0.09  | 0.92560 |
| CHST14     | -0.01 | 8.01  | -0.09 | 0.92565 |
| CSE1L      | 0.01  | 8.59  | 0.09  | 0.92575 |
| PID1       | 0.02  | 7.80  | 0.09  | 0.92580 |
| ING1       | 0.01  | 8.62  | 0.09  | 0.92589 |
| FGFR1OP2   | -0.01 | 8.65  | -0.09 | 0.92609 |
| FANCG      | 0.01  | 7.26  | 0.09  | 0.92612 |
| GON7       | -0.01 | 6.43  | -0.09 | 0.92613 |
| ZNF721     | -0.01 | 7.57  | -0.09 | 0.92643 |
| FOSB       | 0.01  | 6.45  | 0.09  | 0.92650 |
| ARHGEF12   | 0.02  | 8.53  | 0.09  | 0.92663 |
| ZNF263     | -0.01 | 8.60  | -0.09 | 0.92679 |
| COX17P1    | 0.01  | 5.21  | 0.09  | 0.92688 |
| TUBE1      | -0.01 | 6.37  | -0.09 | 0.92689 |
| NMNAT3     | -0.01 | 5.45  | -0.09 | 0.92712 |
| DYNC1I2    | 0.01  | 8.84  | 0.09  | 0.92726 |
| MDC1       | -0.01 | 8.86  | -0.09 | 0.92746 |
| AC159540.2 | 0.01  | 5.12  | 0.09  | 0.92750 |
| CCDC114    | -0.01 | 5.39  | -0.09 | 0.92755 |
| CR2        | 0.01  | 6.43  | 0.09  | 0.92776 |
| S1PR1      | -0.01 | 11.06 | -0.09 | 0.92788 |
| FOXD2      | 0.01  | 5.01  | 0.09  | 0.92790 |
| NPIPA3     | 0.01  | 5.79  | 0.09  | 0.92791 |
| NUDT7      | -0.01 | 5.68  | -0.09 | 0.92797 |
| USP13      | 0.01  | 6.30  | 0.09  | 0.92803 |
| NPC2       | 0.01  | 10.87 | 0.09  | 0.92805 |
| SARAF      | -0.01 | 12.21 | -0.09 | 0.92809 |
| ABHD17AP5  | -0.01 | 5.06  | -0.09 | 0.92828 |
| PSIP1      | -0.01 | 9.13  | -0.09 | 0.92830 |
| ST3GAL1    | 0.01  | 11.12 | 0.09  | 0.92847 |
| DNAJA4     | -0.01 | 7.99  | -0.09 | 0.92885 |
| ZNF396     | -0.01 | 5.71  | -0.09 | 0.92899 |
| AC092368.3 | 0.01  | 6.37  | 0.09  | 0.92907 |
| IGHV1-46   | 0.02  | 7.03  | 0.09  | 0.92926 |
| AC022506.2 | -0.01 | 5.38  | -0.09 | 0.92935 |
| AC136624.1 | -0.01 | 5.49  | -0.09 | 0.92959 |
| PROCR      | 0.01  | 5.80  | 0.09  | 0.92962 |
| MXD3       | -0.01 | 8.33  | -0.09 | 0.92964 |
| PPP1R3G    | -0.01 | 5.00  | -0.09 | 0.92966 |
| PRRG4      | 0.02  | 7.97  | 0.09  | 0.92973 |
| CBFA2T2    | 0.01  | 8.71  | 0.09  | 0.92974 |
| AC091804.1 | -0.01 | 5.12  | -0.09 | 0.93010 |
| GYPB       | -0.02 | 6.04  | -0.09 | 0.93048 |

|            |       |       |       |         |
|------------|-------|-------|-------|---------|
| H2AZP2     | 0.01  | 5.23  | 0.09  | 0.93058 |
| TRAV22     | -0.01 | 5.62  | -0.09 | 0.93092 |
| IRF2BPL    | 0.01  | 9.56  | 0.09  | 0.93093 |
| DUSP16     | -0.01 | 8.73  | -0.09 | 0.93103 |
| ZNF135     | 0.01  | 5.39  | 0.09  | 0.93110 |
| SNX20      | -0.01 | 11.07 | -0.09 | 0.93126 |
| RIC8B      | -0.01 | 6.60  | -0.09 | 0.93142 |
| DACT1      | -0.02 | 5.22  | -0.09 | 0.93146 |
| ERICH1     | -0.01 | 8.64  | -0.09 | 0.93179 |
| E2F5       | 0.01  | 6.06  | 0.09  | 0.93184 |
| RBM19      | 0.01  | 8.74  | 0.09  | 0.93188 |
| AL137003.1 | -0.01 | 5.30  | -0.09 | 0.93192 |
| CELF1      | 0.01  | 10.53 | 0.09  | 0.93203 |
| ZNF461     | 0.01  | 6.08  | 0.09  | 0.93206 |
| C1QA       | 0.02  | 7.48  | 0.09  | 0.93213 |
| SLC19A1    | 0.01  | 10.35 | 0.09  | 0.93214 |
| ZNF687     | 0.01  | 9.80  | 0.09  | 0.93218 |
| NFKB1      | 0.01  | 10.46 | 0.09  | 0.93247 |
| COX7A2P2   | 0.01  | 5.25  | 0.09  | 0.93255 |
| E2F2       | -0.02 | 8.30  | -0.08 | 0.93264 |
| AC008875.2 | 0.01  | 5.20  | 0.08  | 0.93289 |
| CANT1      | -0.01 | 11.02 | -0.08 | 0.93291 |
| PHLDA1     | -0.01 | 5.90  | -0.08 | 0.93291 |
| CFH        | 0.01  | 6.07  | 0.08  | 0.93296 |
| FBXO32     | -0.01 | 7.71  | -0.08 | 0.93305 |
| PRKX       | 0.01  | 9.18  | 0.08  | 0.93315 |
| MMP9       | -0.02 | 11.91 | -0.08 | 0.93320 |
| WWOX       | -0.01 | 6.56  | -0.08 | 0.93324 |
| LGALS2     | 0.02  | 9.42  | 0.08  | 0.93338 |
| REC8       | -0.01 | 9.30  | -0.08 | 0.93342 |
| HSPA8P1    | -0.01 | 6.69  | -0.08 | 0.93348 |
| PPOX       | 0.01  | 8.33  | 0.08  | 0.93361 |
| AC136475.2 | 0.01  | 5.35  | 0.08  | 0.93366 |
| IGHV3-23   | 0.02  | 9.29  | 0.08  | 0.93371 |
| COPS5      | 0.00  | 8.68  | 0.08  | 0.93388 |
| INPP5F     | 0.01  | 6.79  | 0.08  | 0.93390 |
| RWDD4P2    | -0.01 | 5.08  | -0.08 | 0.93394 |
| DDX52      | 0.01  | 7.69  | 0.08  | 0.93398 |
| NCKAP1L    | 0.00  | 11.94 | -0.08 | 0.93408 |
| RET        | 0.01  | 5.03  | 0.08  | 0.93410 |
| H1-2       | -0.01 | 9.39  | -0.08 | 0.93430 |
| FGFBP2     | 0.02  | 10.25 | 0.08  | 0.93435 |
| MSRB1      | -0.01 | 12.70 | -0.08 | 0.93439 |
| DKC1       | 0.00  | 9.25  | 0.08  | 0.93447 |
| ITGB1BP1   | -0.01 | 8.63  | -0.08 | 0.93472 |
| BMPR1A     | -0.01 | 5.46  | -0.08 | 0.93483 |
| SAYS1      | 0.01  | 7.63  | 0.08  | 0.93490 |
| TBC1D3E    | -0.01 | 6.29  | -0.08 | 0.93492 |
| MPHOSPH10  | 0.01  | 8.07  | 0.08  | 0.93499 |
| MTCO3P12   | 0.01  | 8.23  | 0.08  | 0.93509 |

|            |       |       |       |         |
|------------|-------|-------|-------|---------|
| POC1A      | 0.01  | 5.90  | 0.08  | 0.93519 |
| MRPL47     | 0.01  | 7.16  | 0.08  | 0.93521 |
| ACAT1      | -0.01 | 7.91  | -0.08 | 0.93534 |
| SHLD2      | -0.01 | 7.00  | -0.08 | 0.93534 |
| AP1M2      | 0.01  | 5.94  | 0.08  | 0.93542 |
| SERPINE1   | 0.01  | 5.46  | 0.08  | 0.93560 |
| ATPAF1     | 0.01  | 8.10  | 0.08  | 0.93575 |
| AL592148.1 | -0.01 | 5.55  | -0.08 | 0.93599 |
| AC068473.5 | -0.01 | 5.82  | -0.08 | 0.93630 |
| EIF3LP1    | 0.01  | 6.04  | 0.08  | 0.93640 |
| ZNF329     | -0.01 | 6.99  | -0.08 | 0.93652 |
| EIF3KP3    | 0.01  | 5.14  | 0.08  | 0.93657 |
| WDR73      | 0.01  | 8.25  | 0.08  | 0.93661 |
| SEMA3B     | 0.01  | 5.22  | 0.08  | 0.93662 |
| ATP1A1-AS1 | -0.01 | 5.50  | -0.08 | 0.93664 |
| EHD2       | 0.01  | 5.00  | 0.08  | 0.93683 |
| RARS2      | 0.00  | 7.89  | -0.08 | 0.93684 |
| APBB3      | -0.01 | 8.48  | -0.08 | 0.93687 |
| FAM117B    | 0.01  | 7.96  | 0.08  | 0.93688 |
| AATK       | 0.01  | 9.64  | 0.08  | 0.93690 |
| KCNK13     | 0.01  | 5.37  | 0.08  | 0.93695 |
| DIS3L      | -0.01 | 8.29  | -0.08 | 0.93697 |
| C7orf61    | 0.01  | 5.36  | 0.08  | 0.93713 |
| GPS2P1     | -0.01 | 6.64  | -0.08 | 0.93746 |
| ADORA3     | -0.01 | 5.85  | -0.08 | 0.93746 |
| PLBD2      | -0.01 | 9.02  | -0.08 | 0.93753 |
| AL591895.1 | 0.01  | 7.12  | 0.08  | 0.93758 |
| MLLT1      | 0.01  | 10.45 | 0.08  | 0.93770 |
| CHD2       | -0.01 | 11.01 | -0.08 | 0.93774 |
| RAB2B      | -0.01 | 7.83  | -0.08 | 0.93777 |
| BX322234.1 | 0.01  | 5.44  | 0.08  | 0.93790 |
| C21orf58   | 0.01  | 6.30  | 0.08  | 0.93795 |
| PPP2R5E    | -0.01 | 8.17  | -0.08 | 0.93807 |
| MMGT1      | 0.01  | 8.43  | 0.08  | 0.93809 |
| CLK2P1     | -0.01 | 5.53  | -0.08 | 0.93813 |
| AC064805.1 | 0.01  | 7.37  | 0.08  | 0.93815 |
| BANK1      | -0.01 | 8.05  | -0.08 | 0.93836 |
| MYO9B      | -0.01 | 12.65 | -0.08 | 0.93841 |
| ARHGEF9    | 0.01  | 7.95  | 0.08  | 0.93859 |
| TMEM106C   | 0.01  | 7.59  | 0.08  | 0.93879 |
| AL031729.1 | 0.01  | 6.83  | 0.08  | 0.93895 |
| RIMS3      | -0.01 | 6.27  | -0.08 | 0.93921 |
| RER1       | 0.00  | 10.67 | -0.08 | 0.93923 |
| WDR27      | -0.01 | 6.48  | -0.08 | 0.93930 |
| AC004801.1 | 0.01  | 5.25  | 0.08  | 0.93946 |
| SGPP1      | -0.01 | 6.75  | -0.08 | 0.93977 |
| TRAV19     | 0.01  | 5.96  | 0.08  | 0.93977 |
| PIP4K2A    | 0.01  | 11.38 | 0.08  | 0.93989 |
| KMT2A      | -0.01 | 9.70  | -0.08 | 0.93996 |
| GOLGA2P5   | 0.01  | 6.88  | 0.08  | 0.94024 |

|            |       |       |       |         |
|------------|-------|-------|-------|---------|
| TMEM50B    | -0.01 | 8.63  | -0.08 | 0.94024 |
| EARS2      | -0.01 | 7.32  | -0.08 | 0.94044 |
| PRSS21     | 0.02  | 5.67  | 0.07  | 0.94055 |
| PROS1      | 0.01  | 5.39  | 0.07  | 0.94076 |
| ZNF835     | -0.01 | 5.44  | -0.07 | 0.94085 |
| CEP68      | 0.01  | 7.63  | 0.07  | 0.94089 |
| LRP5       | -0.01 | 5.91  | -0.07 | 0.94093 |
| AC015912.3 | 0.01  | 5.58  | 0.07  | 0.94107 |
| ITGA10     | -0.01 | 5.41  | -0.07 | 0.94108 |
| GLIS2      | 0.01  | 5.11  | 0.07  | 0.94110 |
| TCF19      | -0.01 | 7.47  | -0.07 | 0.94121 |
| PABPC1P1   | 0.01  | 5.57  | 0.07  | 0.94130 |
| C1orf43    | 0.00  | 10.44 | 0.07  | 0.94139 |
| SNHG5      | -0.01 | 9.75  | -0.07 | 0.94143 |
| FABP5      | -0.01 | 5.57  | -0.07 | 0.94161 |
| TMEM183A   | 0.00  | 8.71  | 0.07  | 0.94172 |
| PTPN2P1    | 0.01  | 5.13  | 0.07  | 0.94183 |
| TOP1       | -0.01 | 10.31 | -0.07 | 0.94187 |
| TOP3B      | -0.01 | 8.73  | -0.07 | 0.94233 |
| LRG1       | 0.02  | 10.86 | 0.07  | 0.94235 |
| GNAS       | 0.01  | 13.91 | 0.07  | 0.94242 |
| MT-ND6     | -0.01 | 8.09  | -0.07 | 0.94244 |
| PKMP5      | 0.01  | 5.84  | 0.07  | 0.94272 |
| FASLG      | -0.01 | 7.04  | -0.07 | 0.94272 |
| SPI1       | -0.01 | 13.47 | -0.07 | 0.94294 |
| OLA1P1     | -0.01 | 5.39  | -0.07 | 0.94297 |
| TRGV8      | 0.01  | 5.05  | 0.07  | 0.94303 |
| RBMS1P1    | 0.01  | 5.45  | 0.07  | 0.94306 |
| CDHR3      | 0.01  | 5.46  | 0.07  | 0.94319 |
| AL513165.1 | -0.01 | 5.67  | -0.07 | 0.94327 |
| ST3GAL5    | -0.01 | 8.54  | -0.07 | 0.94334 |
| DDX11L10   | 0.03  | 6.82  | 0.07  | 0.94355 |
| SDCBP2     | 0.01  | 5.59  | 0.07  | 0.94360 |
| PARS2      | -0.01 | 6.53  | -0.07 | 0.94377 |
| APOLD1     | -0.01 | 5.56  | -0.07 | 0.94392 |
| DBN1       | -0.01 | 8.34  | -0.07 | 0.94409 |
| RUNX1      | 0.00  | 9.46  | 0.07  | 0.94426 |
| TRIM62     | 0.00  | 8.31  | -0.07 | 0.94430 |
| NUTM2A-AS1 | -0.01 | 7.77  | -0.07 | 0.94439 |
| KIAA1324   | 0.02  | 9.69  | 0.07  | 0.94445 |
| MT-ND4     | -0.01 | 15.48 | -0.07 | 0.94451 |
| LRCH4      | -0.01 | 9.98  | -0.07 | 0.94466 |
| AC002310.1 | 0.01  | 5.28  | 0.07  | 0.94473 |
| LINC00174  | -0.01 | 7.17  | -0.07 | 0.94485 |
| AL450063.1 | 0.01  | 6.26  | 0.07  | 0.94488 |
| LINC02610  | -0.01 | 5.23  | -0.07 | 0.94499 |
| TDRD9      | 0.01  | 6.14  | 0.07  | 0.94499 |
| STK10      | 0.00  | 13.32 | -0.07 | 0.94510 |
| C19orf12   | 0.01  | 8.28  | 0.07  | 0.94512 |
| PDIA4      | 0.01  | 10.09 | 0.07  | 0.94532 |



|            |       |       |       |         |
|------------|-------|-------|-------|---------|
| ARHGAP33   | -0.01 | 6.96  | -0.07 | 0.94550 |
| TMA16      | 0.01  | 6.78  | 0.07  | 0.94560 |
| PLA2G6     | -0.01 | 8.99  | -0.07 | 0.94561 |
| IGKV1-33   | -0.01 | 5.58  | -0.07 | 0.94561 |
| DNAJC21    | 0.00  | 8.14  | -0.07 | 0.94566 |
| ERMARD     | 0.01  | 7.64  | 0.07  | 0.94568 |
| EIF2S2P4   | -0.01 | 6.51  | -0.07 | 0.94588 |
| DEFA1      | 0.02  | 7.51  | 0.07  | 0.94589 |
| C18orf54   | 0.01  | 5.02  | 0.07  | 0.94605 |
| AKIRIN1    | 0.00  | 9.82  | -0.07 | 0.94612 |
| BEGAIN     | -0.01 | 5.89  | -0.07 | 0.94618 |
| JRK        | 0.00  | 8.34  | -0.07 | 0.94665 |
| TRIM46     | 0.01  | 6.58  | 0.07  | 0.94682 |
| STXBP1     | 0.01  | 5.90  | 0.07  | 0.94686 |
| AC006449.7 | 0.01  | 6.73  | 0.07  | 0.94697 |
| INTS10     | 0.00  | 9.10  | -0.07 | 0.94705 |
| AC005332.3 | -0.01 | 5.08  | -0.07 | 0.94720 |
| PPP1R16B   | 0.01  | 10.10 | 0.07  | 0.94758 |
| WDR77      | 0.00  | 8.09  | -0.07 | 0.94764 |
| XPO5       | 0.00  | 8.44  | -0.07 | 0.94765 |
| B3GNT8     | -0.01 | 8.57  | -0.07 | 0.94768 |
| RAB35      | 0.00  | 10.75 | 0.07  | 0.94786 |
| CPT1A      | -0.01 | 10.66 | -0.07 | 0.94786 |
| ADAM8      | 0.01  | 13.02 | 0.07  | 0.94787 |
| LUCAT1     | -0.01 | 9.81  | -0.07 | 0.94788 |
| FLOT2      | 0.01  | 13.36 | 0.07  | 0.94824 |
| IAH1       | 0.00  | 8.15  | -0.07 | 0.94840 |
| PLOD1      | -0.01 | 10.40 | -0.06 | 0.94853 |
| AC121761.1 | -0.01 | 5.44  | -0.06 | 0.94868 |
| ZNF534     | -0.01 | 5.10  | -0.06 | 0.94935 |
| CCDC24     | -0.01 | 5.99  | -0.06 | 0.94937 |
| TNFRSF17   | 0.01  | 6.03  | 0.06  | 0.94937 |
| MAP3K9     | 0.01  | 6.40  | 0.06  | 0.94963 |
| FCGBP      | -0.01 | 8.24  | -0.06 | 0.94964 |
| IL15RA     | 0.01  | 7.79  | 0.06  | 0.94968 |
| ZNF850     | -0.01 | 5.12  | -0.06 | 0.94968 |
| RAB43P1    | 0.01  | 5.15  | 0.06  | 0.94976 |
| RAB4B      | -0.01 | 6.00  | -0.06 | 0.94978 |
| AC002467.1 | 0.01  | 6.19  | 0.06  | 0.94990 |
| NECAB2     | 0.01  | 7.53  | 0.06  | 0.94990 |
| CADM1      | -0.01 | 5.50  | -0.06 | 0.95015 |
| TRAV17     | 0.01  | 6.35  | 0.06  | 0.95023 |
| CPSF2      | 0.00  | 8.52  | -0.06 | 0.95029 |
| LRIG2      | 0.00  | 7.78  | 0.06  | 0.95030 |
| EGF        | -0.01 | 5.84  | -0.06 | 0.95043 |
| GDI2       | 0.00  | 11.23 | -0.06 | 0.95056 |
| EIF2B1     | 0.00  | 9.36  | 0.06  | 0.95068 |
| GADD45B    | 0.01  | 9.73  | 0.06  | 0.95069 |
| TOP3A      | 0.00  | 9.79  | 0.06  | 0.95070 |
| MEF2D      | 0.00  | 10.55 | -0.06 | 0.95072 |

|            |       |       |       |         |
|------------|-------|-------|-------|---------|
| ZNF630     | -0.01 | 5.45  | -0.06 | 0.95077 |
| ATP6AP1L   | -0.01 | 5.16  | -0.06 | 0.95081 |
| GEMIN5     | 0.00  | 7.94  | 0.06  | 0.95084 |
| AAGAB      | 0.00  | 8.64  | -0.06 | 0.95093 |
| AC110998.1 | 0.01  | 5.28  | 0.06  | 0.95096 |
| CHP1       | 0.00  | 9.83  | -0.06 | 0.95102 |
| PRMT5      | 0.00  | 8.93  | -0.06 | 0.95113 |
| TRA2B      | 0.00  | 9.95  | -0.06 | 0.95120 |
| PLPPR2     | -0.01 | 10.65 | -0.06 | 0.95122 |
| HLA-DQA1   | -0.01 | 10.93 | -0.06 | 0.95130 |
| DDIT3      | 0.01  | 8.75  | 0.06  | 0.95134 |
| KATNAL1    | -0.01 | 5.81  | -0.06 | 0.95140 |
| IGHV3-53   | 0.01  | 6.67  | 0.06  | 0.95144 |
| TRIM16     | 0.01  | 5.84  | 0.06  | 0.95148 |
| CBX3       | 0.00  | 9.38  | 0.06  | 0.95150 |
| LYG1       | 0.01  | 5.30  | 0.06  | 0.95167 |
| TMEM159    | 0.00  | 7.33  | -0.06 | 0.95176 |
| PATJ       | 0.01  | 6.95  | 0.06  | 0.95177 |
| TCTA       | 0.00  | 8.98  | 0.06  | 0.95183 |
| QPRT       | -0.01 | 6.22  | -0.06 | 0.95188 |
| C17orf49   | 0.01  | 5.75  | 0.06  | 0.95196 |
| ALPK3      | 0.01  | 5.15  | 0.06  | 0.95197 |
| LINC00944  | -0.01 | 5.76  | -0.06 | 0.95217 |
| STRADA     | -0.01 | 7.57  | -0.06 | 0.95219 |
| ALDH4A1    | -0.01 | 6.89  | -0.06 | 0.95224 |
| SDC4       | 0.01  | 5.81  | 0.06  | 0.95249 |
| IGHGP      | 0.02  | 7.74  | 0.06  | 0.95295 |
| THNSL1     | 0.01  | 5.96  | 0.06  | 0.95298 |
| AC079944.2 | 0.01  | 7.34  | 0.06  | 0.95300 |
| CD300H     | 0.01  | 7.48  | 0.06  | 0.95309 |
| CLK2       | 0.00  | 9.95  | 0.06  | 0.95348 |
| AC008105.3 | 0.01  | 9.89  | 0.06  | 0.95349 |
| LGALS9     | 0.01  | 11.21 | 0.06  | 0.95355 |
| IGFBP6     | 0.01  | 5.16  | 0.06  | 0.95379 |
| NIPAL2     | -0.01 | 6.84  | -0.06 | 0.95449 |
| AL512504.1 | -0.01 | 5.15  | -0.06 | 0.95456 |
| CAMLG      | 0.00  | 8.77  | 0.06  | 0.95459 |
| CHPF2      | 0.00  | 10.41 | -0.06 | 0.95460 |
| DDX11L9    | -0.01 | 5.84  | -0.06 | 0.95471 |
| PYHIN1     | 0.01  | 9.04  | 0.06  | 0.95486 |
| CNOT11     | 0.00  | 8.61  | -0.06 | 0.95496 |
| PCGF5      | -0.01 | 10.66 | -0.06 | 0.95508 |
| PYGM       | -0.01 | 7.42  | -0.06 | 0.95519 |
| CDC42BPB   | -0.01 | 8.39  | -0.06 | 0.95527 |
| ZNF599     | 0.01  | 5.72  | 0.06  | 0.95534 |
| ACCS       | -0.01 | 8.09  | -0.06 | 0.95540 |
| ST3GAL2    | -0.01 | 10.50 | -0.06 | 0.95553 |
| CELSR3     | -0.01 | 6.54  | -0.06 | 0.95559 |
| YIPF5      | 0.00  | 8.45  | 0.06  | 0.95562 |
| ZBTB46     | 0.01  | 5.96  | 0.06  | 0.95570 |

|              |       |       |       |         |
|--------------|-------|-------|-------|---------|
| LSM8         | 0.00  | 8.19  | -0.06 | 0.95573 |
| AL109918.2   | 0.01  | 5.14  | 0.06  | 0.95577 |
| TNFRSF14-AS1 | -0.01 | 7.58  | -0.05 | 0.95639 |
| TMEM86A      | -0.01 | 5.84  | -0.05 | 0.95642 |
| SERF1A       | -0.01 | 4.92  | -0.05 | 0.95643 |
| DDHD2        | -0.01 | 7.52  | -0.05 | 0.95645 |
| MTCO1P40     | -0.01 | 7.05  | -0.05 | 0.95662 |
| NAE1         | 0.00  | 7.85  | -0.05 | 0.95676 |
| MPZ          | -0.01 | 6.93  | -0.05 | 0.95678 |
| AL021707.6   | -0.01 | 6.65  | -0.05 | 0.95696 |
| AL354702.1   | -0.01 | 5.58  | -0.05 | 0.95709 |
| ZNF8         | 0.01  | 6.91  | 0.05  | 0.95720 |
| RNF31        | 0.01  | 5.63  | 0.05  | 0.95723 |
| GZF1         | 0.00  | 6.86  | 0.05  | 0.95738 |
| DPH7         | 0.00  | 8.57  | 0.05  | 0.95744 |
| PRPS1        | 0.00  | 8.80  | -0.05 | 0.95751 |
| TMEM119      | -0.01 | 5.04  | -0.05 | 0.95768 |
| WHAMMP2      | 0.01  | 6.51  | 0.05  | 0.95770 |
| ITGB3BP      | 0.00  | 5.96  | 0.05  | 0.95788 |
| ZNF85        | 0.00  | 5.66  | -0.05 | 0.95880 |
| SGPP2        | -0.01 | 6.02  | -0.05 | 0.95885 |
| ZMYND8       | 0.00  | 9.39  | 0.05  | 0.95886 |
| AC107959.1   | 0.00  | 7.17  | -0.05 | 0.95895 |
| AC009303.4   | -0.01 | 4.99  | -0.05 | 0.95903 |
| ZNF383       | 0.00  | 6.81  | 0.05  | 0.95908 |
| BRIX1        | 0.00  | 7.29  | -0.05 | 0.95937 |
| PSMG3-AS1    | -0.01 | 7.15  | -0.05 | 0.95937 |
| TMEM41B      | 0.00  | 7.39  | -0.05 | 0.95945 |
| SELENOK      | 0.00  | 8.71  | -0.05 | 0.95978 |
| ABTB1        | 0.01  | 13.34 | 0.05  | 0.95989 |
| TCTN3        | 0.00  | 8.05  | -0.05 | 0.95998 |
| SLITRK4      | 0.01  | 5.65  | 0.05  | 0.96009 |
| PTMAP4       | 0.00  | 6.14  | 0.05  | 0.96037 |
| ADGRB2       | -0.01 | 5.59  | -0.05 | 0.96048 |
| WBP11        | 0.00  | 9.91  | -0.05 | 0.96049 |
| PLXDC1       | 0.01  | 7.13  | 0.05  | 0.96050 |
| ASGR2        | 0.01  | 8.77  | 0.05  | 0.96056 |
| CYB561D1     | 0.00  | 9.24  | 0.05  | 0.96057 |
| AC090948.3   | -0.01 | 5.29  | -0.05 | 0.96066 |
| B3GNT9       | 0.00  | 6.49  | -0.05 | 0.96069 |
| RRM2         | 0.01  | 6.17  | 0.05  | 0.96077 |
| MTAP         | 0.00  | 6.83  | 0.05  | 0.96085 |
| GMNN         | 0.00  | 5.77  | 0.05  | 0.96086 |
| SAP30L-AS1   | 0.01  | 5.40  | 0.05  | 0.96095 |
| TAF11        | 0.00  | 7.94  | 0.05  | 0.96119 |
| AC004812.2   | -0.01 | 5.36  | -0.05 | 0.96123 |
| FARP2        | -0.01 | 7.59  | -0.05 | 0.96147 |
| FAM229A      | -0.01 | 7.67  | -0.05 | 0.96155 |
| FTH1P23      | -0.01 | 7.33  | -0.05 | 0.96158 |
| MSH3         | 0.00  | 6.99  | -0.05 | 0.96180 |

|            |       |       |       |         |
|------------|-------|-------|-------|---------|
| HSP90B3P   | 0.00  | 6.41  | -0.05 | 0.96189 |
| BPHL       | -0.01 | 6.51  | -0.05 | 0.96191 |
| ZDHHHC9    | 0.00  | 6.20  | -0.05 | 0.96195 |
| PEX7       | 0.00  | 5.59  | 0.05  | 0.96199 |
| SMIM11A    | 0.00  | 5.02  | -0.05 | 0.96226 |
| ZNF563     | 0.00  | 5.61  | 0.05  | 0.96232 |
| BX640514.2 | -0.01 | 4.96  | -0.05 | 0.96263 |
| SET        | 0.00  | 10.74 | 0.05  | 0.96266 |
| STAG3L2    | -0.01 | 5.95  | -0.05 | 0.96273 |
| H2AC19     | 0.01  | 5.48  | 0.05  | 0.96295 |
| HMGXB3     | 0.00  | 8.75  | -0.05 | 0.96305 |
| GFRA2      | 0.01  | 6.02  | 0.05  | 0.96312 |
| REXO2      | -0.01 | 6.92  | -0.05 | 0.96322 |
| ZNF582     | 0.00  | 5.67  | 0.05  | 0.96326 |
| MYZAP      | -0.01 | 5.37  | -0.05 | 0.96369 |
| PEX11G     | 0.01  | 5.01  | 0.05  | 0.96387 |
| AC087672.2 | 0.01  | 5.19  | 0.05  | 0.96391 |
| SOGA1      | 0.01  | 7.83  | 0.05  | 0.96393 |
| YBX1P2     | 0.01  | 7.35  | 0.05  | 0.96417 |
| EXD3       | 0.00  | 6.85  | -0.05 | 0.96418 |
| TRAV2      | 0.01  | 5.94  | 0.04  | 0.96460 |
| REEP4      | 0.00  | 9.25  | 0.04  | 0.96472 |
| CIR1P1     | -0.01 | 5.64  | -0.04 | 0.96473 |
| ZNF626     | 0.00  | 6.07  | -0.04 | 0.96481 |
| ATP6V0B    | -0.01 | 12.08 | -0.04 | 0.96483 |
| HMGN2P6    | 0.00  | 5.47  | -0.04 | 0.96506 |
| SPATS2     | 0.00  | 6.40  | -0.04 | 0.96518 |
| OAF        | -0.01 | 8.45  | -0.04 | 0.96519 |
| OTULIN     | 0.00  | 8.19  | -0.04 | 0.96525 |
| FSCN1      | 0.00  | 6.78  | -0.04 | 0.96525 |
| LIN54      | 0.00  | 6.86  | 0.04  | 0.96546 |
| TM2D2      | 0.00  | 8.03  | -0.04 | 0.96547 |
| AC114490.3 | -0.01 | 5.23  | -0.04 | 0.96549 |
| S100A9     | 0.01  | 16.54 | 0.04  | 0.96552 |
| UNC13B     | -0.01 | 5.24  | -0.04 | 0.96575 |
| CUEDC1     | 0.01  | 8.47  | 0.04  | 0.96589 |
| ASRGL1     | 0.01  | 7.52  | 0.04  | 0.96591 |
| NME6       | 0.00  | 7.93  | 0.04  | 0.96607 |
| DNAI2      | -0.01 | 5.24  | -0.04 | 0.96611 |
| PSMB8      | 0.00  | 11.71 | 0.04  | 0.96614 |
| AC073857.1 | 0.00  | 5.57  | -0.04 | 0.96617 |
| ANKRD36BP2 | 0.01  | 5.20  | 0.04  | 0.96624 |
| SLC9A3R2   | 0.01  | 6.16  | 0.04  | 0.96625 |
| ARL3       | 0.00  | 7.44  | 0.04  | 0.96633 |
| AL135999.1 | -0.01 | 7.54  | -0.04 | 0.96645 |
| TSEN34     | -0.01 | 10.06 | -0.04 | 0.96648 |
| ARSG       | 0.00  | 8.00  | -0.04 | 0.96650 |
| PABPC1     | 0.00  | 14.17 | -0.04 | 0.96650 |
| LINC00888  | 0.00  | 5.23  | -0.04 | 0.96652 |
| ARID5B     | 0.00  | 7.80  | 0.04  | 0.96677 |

|            |       |       |       |         |
|------------|-------|-------|-------|---------|
| PSMA4      | 0.00  | 9.82  | 0.04  | 0.96682 |
| TOM1L2     | 0.00  | 9.21  | 0.04  | 0.96688 |
| LINC01422  | 0.00  | 5.51  | 0.04  | 0.96697 |
| PLPP5      | -0.01 | 7.84  | -0.04 | 0.96698 |
| BET1       | 0.00  | 6.95  | 0.04  | 0.96700 |
| LBHD1      | 0.00  | 6.11  | -0.04 | 0.96713 |
| SUB1P3     | 0.00  | 5.45  | 0.04  | 0.96715 |
| AC022916.2 | -0.01 | 6.64  | -0.04 | 0.96717 |
| AL354989.2 | 0.00  | 5.58  | -0.04 | 0.96720 |
| STN1       | 0.00  | 9.04  | -0.04 | 0.96725 |
| ARHGAP35   | 0.00  | 9.43  | -0.04 | 0.96727 |
| AL359918.2 | 0.01  | 6.52  | 0.04  | 0.96727 |
| CWF19L1    | 0.00  | 8.79  | -0.04 | 0.96730 |
| PHKA2      | 0.00  | 9.90  | 0.04  | 0.96734 |
| CHI3L1     | 0.01  | 11.67 | 0.04  | 0.96736 |
| TCP1P1     | 0.00  | 5.50  | 0.04  | 0.96739 |
| RHEB       | 0.00  | 7.97  | -0.04 | 0.96752 |
| KAZN       | 0.01  | 6.66  | 0.04  | 0.96754 |
| RBP7       | -0.01 | 9.42  | -0.04 | 0.96759 |
| H2AZ2      | 0.00  | 9.95  | 0.04  | 0.96760 |
| PLEKHM1    | 0.00  | 10.42 | 0.04  | 0.96774 |
| OGFRP1     | 0.00  | 5.87  | -0.04 | 0.96792 |
| COQ9       | 0.00  | 8.44  | -0.04 | 0.96809 |
| SLC1A7     | -0.01 | 6.25  | -0.04 | 0.96812 |
| NEPRO      | 0.00  | 8.17  | 0.04  | 0.96820 |
| ICMT       | 0.00  | 9.01  | 0.04  | 0.96826 |
| IGKV1D-33  | -0.01 | 5.64  | -0.04 | 0.96829 |
| HTT        | 0.00  | 10.73 | 0.04  | 0.96840 |
| AC018644.1 | 0.01  | 5.47  | 0.04  | 0.96848 |
| GDPD3      | -0.01 | 8.04  | -0.04 | 0.96849 |
| ARL4A      | 0.01  | 6.46  | 0.04  | 0.96854 |
| ARHGAP9    | 0.00  | 12.93 | -0.04 | 0.96855 |
| RPL5P4     | 0.00  | 6.56  | 0.04  | 0.96863 |
| NME8       | 0.01  | 6.77  | 0.04  | 0.96864 |
| WRAP73     | 0.00  | 9.21  | -0.04 | 0.96879 |
| TRBV11-3   | -0.01 | 5.18  | -0.04 | 0.96881 |
| TUFMP1     | 0.00  | 6.05  | -0.04 | 0.96906 |
| NIF3L1     | 0.00  | 7.38  | -0.04 | 0.96914 |
| BCS1L      | 0.00  | 7.83  | -0.04 | 0.96940 |
| TRBV24-1   | -0.01 | 5.72  | -0.04 | 0.96951 |
| LINC02785  | 0.00  | 5.32  | 0.04  | 0.96996 |
| CCNF       | 0.00  | 6.57  | -0.04 | 0.96999 |
| AC010175.1 | 0.01  | 5.22  | 0.04  | 0.97021 |
| EPHA1-AS1  | 0.01  | 5.44  | 0.04  | 0.97029 |
| TPM1       | 0.00  | 8.15  | 0.04  | 0.97046 |
| DENND1B    | 0.00  | 6.45  | -0.04 | 0.97057 |
| HEBP1      | 0.00  | 8.55  | 0.04  | 0.97062 |
| GUCA1B     | 0.00  | 6.28  | 0.04  | 0.97066 |
| AC046176.1 | 0.00  | 5.96  | 0.04  | 0.97071 |
| SRC        | 0.00  | 8.98  | -0.04 | 0.97089 |

|            |       |       |       |         |
|------------|-------|-------|-------|---------|
| UBXN7      | 0.00  | 9.12  | -0.04 | 0.97090 |
| ZNF691     | 0.00  | 7.80  | -0.04 | 0.97094 |
| MZF1-AS1   | 0.00  | 5.23  | 0.04  | 0.97095 |
| PITRM1     | 0.00  | 9.52  | 0.04  | 0.97102 |
| CDC123     | 0.00  | 9.39  | -0.04 | 0.97105 |
| PARVG      | 0.00  | 12.07 | -0.04 | 0.97110 |
| EID1       | 0.00  | 9.22  | 0.04  | 0.97117 |
| EDEM2      | 0.00  | 9.80  | -0.04 | 0.97128 |
| PMS2CL     | 0.00  | 6.68  | 0.04  | 0.97130 |
| FURIN      | 0.00  | 11.64 | -0.04 | 0.97139 |
| ACTL10     | 0.00  | 5.78  | -0.04 | 0.97163 |
| NEURL4     | 0.00  | 8.75  | 0.04  | 0.97179 |
| C19orf71   | -0.01 | 5.88  | -0.04 | 0.97194 |
| SLC16A5    | 0.00  | 9.21  | -0.04 | 0.97196 |
| C2orf76    | 0.00  | 5.91  | 0.04  | 0.97206 |
| TRBV2      | 0.01  | 6.81  | 0.04  | 0.97211 |
| AL359644.1 | 0.00  | 5.40  | -0.04 | 0.97217 |
| RAB27A     | 0.00  | 10.28 | 0.03  | 0.97241 |
| MAX        | 0.00  | 11.20 | -0.03 | 0.97253 |
| MAPKBP1    | 0.00  | 8.38  | -0.03 | 0.97275 |
| GADD45G    | 0.00  | 5.39  | 0.03  | 0.97275 |
| AC138932.2 | 0.00  | 5.25  | 0.03  | 0.97280 |
| LINC02762  | 0.00  | 5.73  | 0.03  | 0.97284 |
| FNDC11     | 0.00  | 5.23  | 0.03  | 0.97302 |
| NAP1L4P3   | 0.00  | 6.25  | 0.03  | 0.97303 |
| AP005018.2 | 0.00  | 5.28  | 0.03  | 0.97325 |
| DTD2       | 0.00  | 5.78  | 0.03  | 0.97326 |
| ZNF692     | 0.00  | 9.16  | 0.03  | 0.97339 |
| RGS9       | -0.01 | 7.23  | -0.03 | 0.97385 |
| FANK1      | 0.00  | 4.95  | -0.03 | 0.97386 |
| SH3PXD2A   | 0.00  | 7.22  | -0.03 | 0.97399 |
| PPP3CB     | 0.00  | 9.00  | -0.03 | 0.97410 |
| LINC01004  | 0.00  | 5.27  | -0.03 | 0.97423 |
| LINC00861  | 0.00  | 9.92  | 0.03  | 0.97426 |
| SEC16A     | 0.00  | 11.05 | 0.03  | 0.97428 |
| HNRNPA1P35 | 0.00  | 5.80  | -0.03 | 0.97446 |
| CDC42EP1   | 0.00  | 6.92  | 0.03  | 0.97459 |
| EIF5A2     | 0.00  | 5.73  | 0.03  | 0.97468 |
| XCL2       | 0.01  | 6.91  | 0.03  | 0.97495 |
| CPT2       | 0.00  | 8.24  | 0.03  | 0.97496 |
| FOCAD      | 0.00  | 7.91  | -0.03 | 0.97513 |
| SSH3       | 0.00  | 9.00  | -0.03 | 0.97526 |
| HNRNPA3P5  | 0.00  | 5.75  | -0.03 | 0.97527 |
| MAD2L1     | 0.00  | 5.54  | 0.03  | 0.97544 |
| H3P1       | 0.00  | 5.17  | -0.03 | 0.97553 |
| ZXDB       | 0.00  | 6.61  | -0.03 | 0.97555 |
| RALGDS     | 0.00  | 8.26  | 0.03  | 0.97581 |
| AC004687.1 | 0.01  | 10.25 | 0.03  | 0.97597 |
| SUMO2P1    | 0.00  | 5.36  | 0.03  | 0.97623 |
| ZNF43      | 0.00  | 6.88  | 0.03  | 0.97648 |

|           |       |       |       |         |
|-----------|-------|-------|-------|---------|
| SH2D3C    | 0.00  | 11.63 | 0.03  | 0.97663 |
| CENPE     | 0.00  | 5.20  | -0.03 | 0.97666 |
| TBXAS1    | 0.00  | 11.25 | 0.03  | 0.97681 |
| PTGDS     | -0.01 | 7.15  | -0.03 | 0.97714 |
| AIF1      | 0.00  | 12.44 | 0.03  | 0.97728 |
| NFU1      | 0.00  | 6.96  | 0.03  | 0.97735 |
| ZNF347    | 0.00  | 6.03  | 0.03  | 0.97755 |
| WDR86-AS1 | 0.00  | 6.47  | 0.03  | 0.97761 |
| DEFA3     | -0.01 | 9.31  | -0.03 | 0.97777 |
| MT-TW     | 0.00  | 6.42  | 0.03  | 0.97784 |
| TRAF5     | 0.00  | 8.35  | -0.03 | 0.97789 |
| MFAP3L    | 0.00  | 6.76  | -0.03 | 0.97799 |
| KRT8      | 0.00  | 5.00  | -0.03 | 0.97804 |
| METTTL21A | 0.00  | 7.39  | -0.03 | 0.97843 |
| METTTL18  | 0.00  | 6.71  | 0.03  | 0.97849 |
| TRAV8-3   | 0.00  | 6.55  | -0.03 | 0.97855 |
| DBF4      | 0.00  | 6.28  | -0.03 | 0.97862 |
| DAG1      | 0.00  | 8.12  | 0.03  | 0.97870 |
| ALG8      | 0.00  | 7.52  | 0.03  | 0.97884 |
| SLC5A5    | 0.00  | 5.15  | -0.03 | 0.97888 |
| IATPR     | 0.00  | 5.10  | 0.03  | 0.97903 |
| ZNF875    | 0.00  | 8.40  | -0.03 | 0.97919 |
| IGHV1-3   | 0.01  | 6.64  | 0.03  | 0.97940 |
| HELB      | 0.00  | 8.09  | -0.03 | 0.97944 |
| MCEE      | 0.00  | 5.97  | -0.03 | 0.97949 |
| SCML4     | 0.00  | 9.24  | -0.03 | 0.97957 |
| UBXN4     | 0.00  | 9.43  | -0.03 | 0.97966 |
| SNRPA1    | 0.00  | 8.02  | 0.03  | 0.97977 |
| PLEKHO2   | 0.00  | 12.22 | -0.03 | 0.97989 |
| ACTG1P10  | 0.00  | 5.19  | -0.03 | 0.97990 |
| ZC3H8     | 0.00  | 6.82  | -0.02 | 0.98044 |
| FLNB      | 0.00  | 9.21  | 0.02  | 0.98048 |
| CHD9      | 0.00  | 7.53  | 0.02  | 0.98052 |
| JAG2      | 0.00  | 5.16  | -0.02 | 0.98055 |
| DGKH      | 0.00  | 5.83  | 0.02  | 0.98061 |
| SAMD4B    | 0.00  | 9.51  | 0.02  | 0.98066 |
| MRPS6     | 0.00  | 8.12  | -0.02 | 0.98099 |
| MTRF1L    | 0.00  | 6.74  | 0.02  | 0.98104 |
| VIPR1     | 0.00  | 8.90  | -0.02 | 0.98115 |
| RBBP4P1   | 0.00  | 5.24  | -0.02 | 0.98118 |
| MARS2     | 0.00  | 6.34  | 0.02  | 0.98121 |
| NAP1L1P3  | 0.00  | 5.94  | 0.02  | 0.98124 |
| ERC1      | 0.00  | 8.26  | -0.02 | 0.98153 |
| DEFA4     | -0.01 | 7.47  | -0.02 | 0.98157 |
| IGLV6-57  | 0.01  | 6.97  | 0.02  | 0.98164 |
| ADARB2    | 0.01  | 5.27  | 0.02  | 0.98180 |
| CHAD      | 0.00  | 5.23  | -0.02 | 0.98186 |
| ZCCHC9    | 0.00  | 7.39  | -0.02 | 0.98195 |
| PVALB     | 0.00  | 5.59  | -0.02 | 0.98203 |
| UNK       | 0.00  | 8.69  | 0.02  | 0.98212 |

|             |      |       |       |         |
|-------------|------|-------|-------|---------|
| AP001889.1  | 0.00 | 5.67  | -0.02 | 0.98214 |
| PHYKPL      | 0.00 | 10.25 | -0.02 | 0.98215 |
| CALD1       | 0.00 | 5.27  | 0.02  | 0.98228 |
| CNDP2       | 0.00 | 10.99 | 0.02  | 0.98231 |
| PCDH9       | 0.00 | 5.47  | -0.02 | 0.98247 |
| COPS7B      | 0.00 | 9.11  | -0.02 | 0.98250 |
| H4C14       | 0.00 | 5.13  | 0.02  | 0.98275 |
| ATP2A1      | 0.00 | 5.53  | -0.02 | 0.98276 |
| LTBR        | 0.00 | 10.44 | -0.02 | 0.98292 |
| PNISR       | 0.00 | 10.32 | -0.02 | 0.98297 |
| OSTC        | 0.00 | 7.96  | -0.02 | 0.98310 |
| CEP295      | 0.00 | 6.92  | 0.02  | 0.98324 |
| RXYLT1      | 0.00 | 6.65  | 0.02  | 0.98328 |
| NDFIP1      | 0.00 | 9.71  | -0.02 | 0.98340 |
| NCOA5       | 0.00 | 9.62  | -0.02 | 0.98352 |
| BNIP3L      | 0.00 | 10.99 | 0.02  | 0.98354 |
| SLC26A6     | 0.00 | 8.57  | -0.02 | 0.98366 |
| HAR1A       | 0.00 | 5.90  | -0.02 | 0.98381 |
| AC108073.1  | 0.00 | 5.86  | -0.02 | 0.98399 |
| RPL15P18    | 0.00 | 5.49  | -0.02 | 0.98400 |
| LINC02019   | 0.00 | 5.76  | 0.02  | 0.98409 |
| MBNL3       | 0.00 | 9.78  | 0.02  | 0.98412 |
| TMEM44-AS1  | 0.00 | 5.91  | -0.02 | 0.98417 |
| EIF1AD      | 0.00 | 8.41  | 0.02  | 0.98420 |
| C19orf54    | 0.00 | 7.76  | -0.02 | 0.98447 |
| LENG8-AS1   | 0.00 | 5.84  | 0.02  | 0.98455 |
| MRPS30      | 0.00 | 7.97  | 0.02  | 0.98473 |
| RPS15AP38   | 0.00 | 6.06  | -0.02 | 0.98473 |
| ANKRD23     | 0.00 | 5.66  | 0.02  | 0.98474 |
| WDFY4       | 0.00 | 10.66 | 0.02  | 0.98483 |
| CD3G        | 0.00 | 9.06  | -0.02 | 0.98497 |
| POLG2       | 0.00 | 7.02  | 0.02  | 0.98501 |
| PSMC3IP     | 0.00 | 5.80  | 0.02  | 0.98524 |
| CSNK2A3     | 0.00 | 5.15  | -0.02 | 0.98531 |
| IGHV4-39    | 0.00 | 8.14  | 0.02  | 0.98561 |
| LAMA5       | 0.00 | 6.17  | -0.02 | 0.98561 |
| AL096870.10 | 0.00 | 5.87  | -0.02 | 0.98572 |
| FAM76A      | 0.00 | 7.00  | -0.02 | 0.98573 |
| C13orf46    | 0.00 | 5.26  | 0.02  | 0.98575 |
| ATP5F1AP3   | 0.00 | 6.27  | 0.02  | 0.98577 |
| PDSS2       | 0.00 | 6.84  | 0.02  | 0.98585 |
| FAM89A      | 0.00 | 5.44  | -0.02 | 0.98599 |
| AC022182.2  | 0.00 | 6.09  | -0.02 | 0.98603 |
| SLC12A9     | 0.00 | 11.48 | 0.02  | 0.98613 |
| UEVLD       | 0.00 | 6.88  | -0.02 | 0.98613 |
| RNASE3      | 0.00 | 6.63  | -0.02 | 0.98622 |
| EPHB3       | 0.00 | 6.14  | 0.02  | 0.98634 |
| SLC25A5P2   | 0.00 | 5.22  | -0.02 | 0.98660 |
| ZNF248      | 0.00 | 6.52  | 0.02  | 0.98671 |
| TAGLN       | 0.00 | 8.53  | -0.02 | 0.98680 |



|             |      |       |       |         |
|-------------|------|-------|-------|---------|
| CCDC71L     | 0.00 | 8.25  | 0.02  | 0.98701 |
| ERV3-1      | 0.00 | 7.17  | 0.02  | 0.98711 |
| H2BC12      | 0.00 | 8.47  | -0.02 | 0.98716 |
| SHISA5      | 0.00 | 12.51 | -0.02 | 0.98718 |
| SLC2A5      | 0.00 | 6.23  | -0.02 | 0.98723 |
| DKK3        | 0.00 | 5.15  | -0.02 | 0.98758 |
| USP39       | 0.00 | 9.64  | -0.02 | 0.98760 |
| PTP4A2P1    | 0.00 | 5.95  | -0.02 | 0.98762 |
| PCBP1       | 0.00 | 13.22 | -0.02 | 0.98765 |
| LARP1B      | 0.00 | 6.74  | -0.02 | 0.98768 |
| GTF3C1      | 0.00 | 10.45 | 0.02  | 0.98775 |
| UBL5P2      | 0.00 | 6.38  | -0.02 | 0.98776 |
| SRP14       | 0.00 | 11.07 | -0.02 | 0.98777 |
| F11R        | 0.00 | 9.43  | 0.02  | 0.98790 |
| SMIM10L2A   | 0.00 | 5.10  | 0.02  | 0.98797 |
| PPIEL       | 0.00 | 7.39  | 0.01  | 0.98814 |
| PDCD2       | 0.00 | 8.74  | 0.01  | 0.98818 |
| SNHG4       | 0.00 | 5.17  | 0.01  | 0.98827 |
| HLA-E       | 0.00 | 16.20 | 0.01  | 0.98836 |
| PDCD4       | 0.00 | 10.19 | -0.01 | 0.98863 |
| C20orf197   | 0.00 | 5.48  | 0.01  | 0.98863 |
| SRP14P2     | 0.00 | 5.73  | 0.01  | 0.98864 |
| BCCIP       | 0.00 | 8.24  | 0.01  | 0.98874 |
| PEA15       | 0.00 | 9.91  | -0.01 | 0.98877 |
| SEPSECS-AS1 | 0.00 | 5.45  | 0.01  | 0.98884 |
| GPER1       | 0.00 | 5.93  | -0.01 | 0.98899 |
| GCN1        | 0.00 | 10.63 | -0.01 | 0.98909 |
| SLC18A2     | 0.00 | 5.04  | 0.01  | 0.98929 |
| FES         | 0.00 | 11.39 | -0.01 | 0.98932 |
| SPAG16      | 0.00 | 5.38  | 0.01  | 0.98980 |
| MRPS28      | 0.00 | 5.63  | 0.01  | 0.98983 |
| FUS         | 0.00 | 11.71 | -0.01 | 0.98996 |
| LRRFIP1P1   | 0.00 | 5.23  | 0.01  | 0.98998 |
| HAUS1       | 0.00 | 7.02  | -0.01 | 0.98998 |
| AP000757.1  | 0.00 | 5.18  | -0.01 | 0.99010 |
| AC125494.2  | 0.00 | 5.46  | -0.01 | 0.99013 |
| AC009133.1  | 0.00 | 5.91  | 0.01  | 0.99017 |
| ASPHD2      | 0.00 | 7.50  | -0.01 | 0.99022 |
| RBM28       | 0.00 | 8.43  | -0.01 | 0.99027 |
| ZNF14       | 0.00 | 7.47  | -0.01 | 0.99030 |
| DCUN1D2     | 0.00 | 7.47  | -0.01 | 0.99031 |
| NCF4        | 0.00 | 12.87 | 0.01  | 0.99043 |
| TRGC2       | 0.00 | 8.90  | 0.01  | 0.99064 |
| ITGB2       | 0.00 | 15.16 | 0.01  | 0.99074 |
| RASA4DP     | 0.00 | 5.16  | 0.01  | 0.99080 |
| IZUMO4      | 0.00 | 6.49  | 0.01  | 0.99100 |
| KLC1        | 0.00 | 8.77  | -0.01 | 0.99104 |
| TIMM23      | 0.00 | 8.51  | -0.01 | 0.99106 |
| ENDOD1      | 0.00 | 8.09  | 0.01  | 0.99114 |
| AC092017.1  | 0.00 | 5.25  | 0.01  | 0.99117 |

|            |      |       |       |         |
|------------|------|-------|-------|---------|
| PGLYRP1    | 0.00 | 9.72  | 0.01  | 0.99127 |
| NFATC2     | 0.00 | 9.69  | -0.01 | 0.99159 |
| AL590617.2 | 0.00 | 5.52  | -0.01 | 0.99172 |
| H1FX-AS1   | 0.00 | 5.34  | 0.01  | 0.99189 |
| AL136295.7 | 0.00 | 6.19  | 0.01  | 0.99220 |
| KLHL7      | 0.00 | 6.86  | 0.01  | 0.99223 |
| RFT1       | 0.00 | 7.66  | -0.01 | 0.99225 |
| TMEM30B    | 0.00 | 5.23  | -0.01 | 0.99226 |
| EPB41L5    | 0.00 | 5.49  | 0.01  | 0.99237 |
| RTN4IP1    | 0.00 | 6.15  | 0.01  | 0.99259 |
| AL353622.1 | 0.00 | 5.70  | -0.01 | 0.99269 |
| CAPN10-DT  | 0.00 | 5.73  | -0.01 | 0.99281 |
| MYH3       | 0.00 | 6.67  | -0.01 | 0.99287 |
| ZHX2       | 0.00 | 9.48  | 0.01  | 0.99294 |
| ZNF845     | 0.00 | 7.20  | 0.01  | 0.99300 |
| LINC01569  | 0.00 | 5.98  | -0.01 | 0.99303 |
| TXNP6      | 0.00 | 5.92  | -0.01 | 0.99314 |
| MALSU1     | 0.00 | 7.40  | -0.01 | 0.99327 |
| REPS1      | 0.00 | 8.56  | 0.01  | 0.99334 |
| AC005839.1 | 0.00 | 5.37  | -0.01 | 0.99345 |
| AL391832.3 | 0.00 | 5.05  | 0.01  | 0.99345 |
| APPBP2     | 0.00 | 7.76  | -0.01 | 0.99353 |
| AKAP9      | 0.00 | 9.24  | 0.01  | 0.99358 |
| AC132812.1 | 0.00 | 5.85  | -0.01 | 0.99393 |
| GAPDHP70   | 0.00 | 5.38  | -0.01 | 0.99394 |
| GPRC5D-AS1 | 0.00 | 4.97  | 0.01  | 0.99396 |
| BMF        | 0.00 | 9.63  | 0.01  | 0.99406 |
| RBM27      | 0.00 | 7.05  | 0.01  | 0.99436 |
| SRI        | 0.00 | 9.56  | 0.01  | 0.99447 |
| NEXN       | 0.00 | 7.15  | 0.01  | 0.99474 |
| IGKV1-16   | 0.00 | 6.22  | 0.01  | 0.99474 |
| TBX21      | 0.00 | 10.24 | -0.01 | 0.99476 |
| SOCS7      | 0.00 | 7.74  | 0.01  | 0.99499 |
| STAP1      | 0.00 | 6.49  | -0.01 | 0.99505 |
| APOBEC3H   | 0.00 | 6.53  | 0.01  | 0.99507 |
| HLA-DPA1   | 0.00 | 13.09 | 0.01  | 0.99518 |
| CRAMP1     | 0.00 | 7.71  | -0.01 | 0.99519 |
| GZMH       | 0.00 | 10.90 | 0.01  | 0.99533 |
| ZNRD2-AS1  | 0.00 | 5.44  | 0.01  | 0.99549 |
| OPN3       | 0.00 | 7.19  | 0.01  | 0.99564 |
| EEF1A1P13  | 0.00 | 8.84  | -0.01 | 0.99568 |
| RSKR       | 0.00 | 6.90  | 0.01  | 0.99571 |
| TDRD3      | 0.00 | 7.38  | 0.01  | 0.99573 |
| EEF1E1     | 0.00 | 5.41  | 0.01  | 0.99578 |
| LAMP1      | 0.00 | 12.27 | 0.01  | 0.99588 |
| HNRNPA1L2  | 0.00 | 7.31  | -0.01 | 0.99591 |
| ZNF587B    | 0.00 | 6.87  | 0.01  | 0.99597 |
| ZNF275     | 0.00 | 7.88  | 0.00  | 0.99605 |
| LINC00623  | 0.00 | 8.34  | 0.00  | 0.99605 |
| SOX13      | 0.00 | 7.53  | 0.00  | 0.99624 |

|           |      |       |      |         |
|-----------|------|-------|------|---------|
| ZNF543    | 0.00 | 5.43  | 0.00 | 0.99678 |
| ANPEP     | 0.00 | 12.77 | 0.00 | 0.99686 |
| FTH1P7    | 0.00 | 8.86  | 0.00 | 0.99693 |
| TRDJ1     | 0.00 | 5.02  | 0.00 | 0.99700 |
| EFHD2     | 0.00 | 13.37 | 0.00 | 0.99707 |
| ZNF276    | 0.00 | 10.80 | 0.00 | 0.99717 |
| NUP35     | 0.00 | 5.68  | 0.00 | 0.99727 |
| PADI4     | 0.00 | 11.82 | 0.00 | 0.99729 |
| PIPOX     | 0.00 | 5.04  | 0.00 | 0.99747 |
| EXOG      | 0.00 | 6.41  | 0.00 | 0.99755 |
| PNPO      | 0.00 | 6.68  | 0.00 | 0.99769 |
| DNAJC19   | 0.00 | 6.98  | 0.00 | 0.99772 |
| PIK3R6    | 0.00 | 8.25  | 0.00 | 0.99792 |
| LINC01943 | 0.00 | 5.20  | 0.00 | 0.99802 |
| ACOT11    | 0.00 | 5.63  | 0.00 | 0.99812 |
| LILRB4    | 0.00 | 9.24  | 0.00 | 0.99812 |
| RPL5P29   | 0.00 | 6.28  | 0.00 | 0.99842 |
| HLA-DMB   | 0.00 | 10.68 | 0.00 | 0.99856 |
| RMC1      | 0.00 | 8.78  | 0.00 | 0.99861 |
| DLG3      | 0.00 | 7.48  | 0.00 | 0.99869 |
| NDFIP2    | 0.00 | 5.15  | 0.00 | 0.99884 |
| SBNO2     | 0.00 | 11.64 | 0.00 | 0.99902 |
| GPBAR1    | 0.00 | 9.10  | 0.00 | 0.99919 |
| VSIR      | 0.00 | 14.12 | 0.00 | 0.99919 |
| CST3      | 0.00 | 12.77 | 0.00 | 0.99926 |
| RGS3      | 0.00 | 10.12 | 0.00 | 0.99929 |
| NUDT15    | 0.00 | 5.73  | 0.00 | 0.99937 |
| ZNF419    | 0.00 | 7.02  | 0.00 | 0.99939 |
| DPH6      | 0.00 | 5.62  | 0.00 | 0.99939 |
| STAG3L4   | 0.00 | 5.94  | 0.00 | 0.99980 |
| MT-TS1    | 0.00 | 5.39  | 0.00 | 0.99985 |
| FTH1P16   | 0.00 | 6.55  | 0.00 | 0.99985 |
| MTX2      | 0.00 | 6.13  | 0.00 | 0.99996 |

and noCAD

[illegible]





[illegible]

0.1051  
0.1051  
0.1051  
0.1052  
0.1052  
0.1052  
0.1052  
0.1052  
0.1052  
0.1052  
0.1052  
0.1052  
0.1052  
0.1052  
0.1052  
0.1052  
0.1052  
0.1052  
0.1052  
0.1052  
0.1052  
0.1052  
0.1056  
0.1056  
0.1056  
0.1056  
0.1060  
0.1060  
0.1060  
0.1063  
0.1066  
0.1066  
0.1066  
0.1067  
0.1072  
0.1072  
0.1072  
0.1072  
0.1072  
0.1072  
0.1072  
0.1072









0.1134  
0.1134  
0.1134  
0.1134  
0.1134  
0.1144  
0.1146  
0.1146  
0.1146  
0.1146  
0.1146  
0.1146  
0.1146  
0.1146  
0.1151  
0.1154  
0.1154  
0.1154  
0.1154  
0.1160  
0.1162  
0.1162  
0.1162  
0.1162  
0.1162  
0.1162  
0.1162  
0.1162  
0.1162  
0.1162  
0.1162  
0.1162  
0.1163  
0.1163  
0.1163  
0.1163  
0.1168  
0.1180  
0.1190  
0.1190  
0.1193  
0.1193  
0.1193  
0.1193  
0.1193  
0.1193  
0.1193  
0.1193  
0.1193

[illegible]

0.1208  
0.1208  
0.1208  
0.1208  
0.1208  
0.1208  
0.1208  
0.1208  
0.1208  
0.1208  
0.1208  
0.1208  
0.1208  
0.1208  
0.1209  
0.1209  
0.1209  
0.1209  
0.1209  
0.1209  
0.1209  
0.1209  
0.1209  
0.1209  
0.1209  
0.1209  
0.1209  
0.1209  
0.1209  
0.1209  
0.1209  
0.1209  
0.1209  
0.1209  
0.1214  
0.1217  
0.1218  
0.1218  
0.1218  
0.1221  
0.1221  
0.1222  
0.1222  
0.1224  
0.1224  
0.1224  
0.1224  
0.1224  
0.1224  
0.1224  
0.1224

0.1227  
0.1230  
0.1230  
0.1231  
0.1231  
0.1236  
0.1236  
0.1236  
0.1237  
0.1237  
0.1243  
0.1243  
0.1258  
0.1258  
0.1258  
0.1258  
0.1258  
0.1258  
0.1260  
0.1260  
0.1260  
0.1266  
0.1274  
0.1274  
0.1274  
0.1274  
0.1274  
0.1274  
0.1274  
0.1274  
0.1274  
0.1274  
0.1274  
0.1275  
0.1275  
0.1275  
0.1275  
0.1275  
0.1275  
0.1275  
0.1275  
0.1275  
0.1280  
0.1284  
0.1284  
0.1284  
0.1285  
0.1285  
0.1285  
0.1285  
0.1292

[illegible]









[illegible]

[illegible]

[illegible]







[illegible]

0.1515  
0.1515  
0.1515  
0.1515  
0.1515  
0.1515  
0.1516  
0.1516  
0.1516  
0.1516  
0.1518  
0.1518  
0.1519  
0.1522  
0.1524  
0.1524  
0.1524  
0.1524  
0.1524  
0.1524  
0.1524  
0.1524  
0.1524  
0.1526  
0.1526  
0.1526  
0.1526  
0.1527  
0.1529  
0.1532  
0.1533  
0.1533  
0.1533  
0.1533  
0.1533  
0.1534  
0.1535  
0.1535  
0.1535  
0.1535  
0.1535  
0.1536  
0.1536  
0.1536  
0.1536  
0.1536  
0.1536  
0.1536  
0.1536  
0.1536

0.1536  
0.1536  
0.1536  
0.1536  
0.1536  
0.1536  
0.1536  
0.1536  
0.1536  
0.1536  
0.1536  
0.1536  
0.1536  
0.1536  
0.1536  
0.1536  
0.1536  
0.1536  
0.1536  
0.1536  
0.1536  
0.1536  
0.1536  
0.1536  
0.1536  
0.1536  
0.1536  
0.1536  
0.1536  
0.1536  
0.1536  
0.1536  
0.1536  
0.1536  
0.1536  
0.1538  
0.1538  
0.1538  
0.1539  
0.1539  
0.1539

0.1539  
0.1539  
0.1540  
0.1540  
0.1547  
0.1551  
0.1551  
0.1551  
0.1551  
0.1551  
0.1553  
0.1553  
0.1555  
0.1555  
0.1560  
0.1563  
0.1563  
0.1563  
0.1563  
0.1563  
0.1563  
0.1563  
0.1563  
0.1563  
0.1567  
0.1568  
0.1568  
0.1568  
0.1568  
0.1568  
0.1568  
0.1568  
0.1568  
0.1568  
0.1568  
0.1568  
0.1568  
0.1568  
0.1568  
0.1568  
0.1568  
0.1568  
0.1568  
0.1568  
0.1568  
0.1570  
0.1571  
0.1573  
0.1574  
0.1574

0.1576  
0.1577  
0.1577  
0.1577  
0.1577  
0.1577  
0.1577  
0.1577  
0.1577  
0.1577  
0.1577  
0.1577  
0.1577  
0.1577  
0.1577  
0.1577  
0.1577  
0.1579  
0.1579  
0.1579  
0.1579  
0.1579  
0.1580  
0.1580  
0.1584  
0.1586  
0.1586  
0.1587  
0.1587  
0.1588  
0.1588  
0.1588  
0.1588  
0.1588  
0.1588  
0.1588  
0.1588  
0.1588  
0.1588  
0.1588  
0.1588  
0.1588  
0.1588  
0.1588  
0.1588  
0.1588  
0.1589  
0.1589  
0.1589  
0.1589  
0.1589

|        |  |
|--------|--|
| 0.1589 |  |
| 0.1589 |  |
| 0.1589 |  |
| 0.1589 |  |
| 0.1589 |  |
| 0.1589 |  |
| 0.1589 |  |
| 0.1589 |  |
| 0.1589 |  |
| 0.1589 |  |
| 0.1589 |  |
| 0.1589 |  |
| 0.1589 |  |
| 0.1589 |  |
| 0.1589 |  |
| 0.1589 |  |
| 0.1589 |  |
| 0.1590 |  |
| 0.1590 |  |
| 0.1596 |  |
| 0.1596 |  |
| 0.1596 |  |
| 0.1596 |  |
| 0.1596 |  |
| 0.1596 |  |
| 0.1596 |  |
| 0.1596 |  |
| 0.1596 |  |
| 0.1597 |  |
| 0.1597 |  |
| 0.1597 |  |
| 0.1597 |  |
| 0.1597 |  |
| 0.1597 |  |
| 0.1597 |  |
| 0.1597 |  |
| 0.1597 |  |
| 0.1597 |  |
| 0.1598 |  |
| 0.1598 |  |
| 0.1598 |  |
| 0.1599 |  |
| 0.1599 |  |
| 0.1600 |  |
| 0.1602 |  |
| 0.1604 |  |
| 0.1604 |  |
| 0.1604 |  |
| 0.1604 |  |

0.1604  
0.1607  
0.1607  
0.1607  
0.1607  
0.1607  
0.1608  
0.1608  
0.1608  
0.1608  
0.1609  
0.1609  
0.1610  
0.1610  
0.1611  
0.1615  
0.1615  
0.1615  
0.1615  
0.1615  
0.1615  
0.1619  
0.1619  
0.1619  
0.1619  
0.1619  
0.1620  
0.1620  
0.1620  
0.1620  
0.1620  
0.1620  
0.1620  
0.1620  
0.1620  
0.1622  
0.1624  
0.1624  
0.1624  
0.1624  
0.1628  
0.1629  
0.1633  
0.1633  
0.1633  
0.1633  
0.1633  
0.1633  
0.1633  
0.1633

[illegible]



0.1668  
0.1668  
0.1669  
0.1669  
0.1670  
0.1670  
0.1671  
0.1674  
0.1674  
0.1674  
0.1674  
0.1675  
0.1675  
0.1679  
0.1680  
0.1682  
0.1684  
0.1687  
0.1689  
0.1689  
0.1689  
0.1690  
0.1690  
0.1692  
0.1694  
0.1696  
0.1696  
0.1696  
0.1696  
0.1697  
0.1697  
0.1697  
0.1697  
0.1697  
0.1697  
0.1697  
0.1697  
0.1700  
0.1701  
0.1701  
0.1701  
0.1701  
0.1702  
0.1703  
0.1703  
0.1704  
0.1704  
0.1704  
0.1706  
0.1706

[illegible]

0.1735  
0.1736  
0.1739  
0.1739  
0.1739  
0.1741  
0.1741  
0.1741  
0.1741  
0.1741  
0.1743  
0.1745  
0.1745  
0.1745  
0.1747  
0.1747  
0.1747  
0.1747  
0.1747  
0.1747  
0.1747  
0.1747  
0.1747  
0.1747  
0.1747  
0.1747  
0.1747  
0.1747  
0.1747  
0.1747  
0.1747  
0.1747  
0.1747  
0.1747  
0.1747  
0.1747  
0.1748  
0.1749  
0.1751  
0.1753  
0.1753  
0.1753  
0.1753  
0.1753  
0.1753  
0.1753  
0.1753  
0.1756

|        |  |
|--------|--|
| 0.1756 |  |
| 0.1756 |  |
| 0.1756 |  |
| 0.1756 |  |
| 0.1756 |  |
| 0.1756 |  |
| 0.1756 |  |
| 0.1758 |  |
| 0.1758 |  |
| 0.1758 |  |
| 0.1758 |  |
| 0.1758 |  |
| 0.1758 |  |
| 0.1758 |  |
| 0.1762 |  |
| 0.1764 |  |
| 0.1767 |  |
| 0.1767 |  |
| 0.1767 |  |
| 0.1767 |  |
| 0.1767 |  |
| 0.1767 |  |
| 0.1768 |  |
| 0.1771 |  |
| 0.1771 |  |
| 0.1778 |  |
| 0.1778 |  |
| 0.1778 |  |
| 0.1778 |  |
| 0.1778 |  |
| 0.1778 |  |
| 0.1779 |  |
| 0.1779 |  |
| 0.1779 |  |
| 0.1779 |  |
| 0.1779 |  |
| 0.1779 |  |
| 0.1779 |  |
| 0.1779 |  |
| 0.1779 |  |
| 0.1779 |  |
| 0.1779 |  |
| 0.1779 |  |
| 0.1779 |  |
| 0.1780 |  |
| 0.1780 |  |
| 0.1783 |  |
| 0.1783 |  |

|        |  |
|--------|--|
| 0.1783 |  |
| 0.1783 |  |
| 0.1783 |  |
| 0.1783 |  |
| 0.1783 |  |
| 0.1783 |  |
| 0.1783 |  |
| 0.1783 |  |
| 0.1783 |  |
| 0.1783 |  |
| 0.1785 |  |
| 0.1785 |  |
| 0.1785 |  |
| 0.1785 |  |
| 0.1785 |  |
| 0.1785 |  |
| 0.1785 |  |
| 0.1785 |  |
| 0.1785 |  |
| 0.1785 |  |
| 0.1785 |  |
| 0.1785 |  |
| 0.1785 |  |
| 0.1785 |  |
| 0.1787 |  |
| 0.1787 |  |
| 0.1787 |  |
| 0.1787 |  |
| 0.1789 |  |
| 0.1790 |  |
| 0.1792 |  |
| 0.1792 |  |
| 0.1792 |  |
| 0.1794 |  |
| 0.1795 |  |
| 0.1795 |  |
| 0.1795 |  |
| 0.1795 |  |
| 0.1795 |  |
| 0.1795 |  |
| 0.1798 |  |
| 0.1800 |  |
| 0.1800 |  |
| 0.1800 |  |
| 0.1800 |  |
| 0.1809 |  |
| 0.1809 |  |
| 0.1809 |  |



0.1830  
0.1830  
0.1830  
0.1830  
0.1830  
0.1830  
0.1830  
0.1830  
0.1836  
0.1836  
0.1837  
0.1837  
0.1837  
0.1842  
0.1842  
0.1842  
0.1842  
0.1848  
0.1850  
0.1851  
0.1851  
0.1853  
0.1859  
0.1860  
0.1864  
0.1864  
0.1866  
0.1867  
0.1867  
0.1867  
0.1868  
0.1868  
0.1868  
0.1868  
0.1869  
0.1875  
0.1875  
0.1875  
0.1875  
0.1875  
0.1875  
0.1875  
0.1875  
0.1876  
0.1876  
0.1876  
0.1881  
0.1881  
0.1881  
0.1881  
0.1881  
0.1882

0.1882  
0.1883  
0.1886  
0.1886  
0.1886  
0.1887  
0.1888  
0.1888  
0.1888  
0.1888  
0.1888  
0.1888  
0.1889  
0.1890  
0.1890  
0.1890  
0.1890  
0.1890  
0.1893  
0.1893  
0.1894  
0.1894  
0.1894  
0.1894  
0.1894  
0.1894  
0.1894  
0.1894  
0.1894  
0.1894  
0.1894  
0.1894  
0.1894  
0.1894  
0.1894  
0.1894  
0.1894  
0.1894  
0.1895  
0.1895  
0.1895  
0.1897  
0.1897  
0.1897  
0.1899  
0.1902  
0.1902  
0.1902  
0.1903  
0.1903  
0.1904





0.1959  
0.1959  
0.1959  
0.1959  
0.1959  
0.1959  
0.1959  
0.1959  
0.1959  
0.1959  
0.1960  
0.1962  
0.1963  
0.1963  
0.1963  
0.1963  
0.1967  
0.1967  
0.1968  
0.1970  
0.1970  
0.1974  
0.1974  
0.1974  
0.1974  
0.1979  
0.1981  
0.1981  
0.1981  
0.1981  
0.1982  
0.1984  
0.1984  
0.1984  
0.1985  
0.1987  
0.1989  
0.1989  
0.1992  
0.1993  
0.1994  
0.1994  
0.1996  
0.1997  
0.1997  
0.2001  
0.2003  
0.2003  
0.2003  
0.2003



0.2021  
0.2021  
0.2022  
0.2024  
0.2025  
0.2028  
0.2028  
0.2034  
0.2034  
0.2034  
0.2036  
0.2036  
0.2036  
0.2036  
0.2037  
0.2037  
0.2039  
0.2039  
0.2041  
0.2043  
0.2044  
0.2044  
0.2047  
0.2050  
0.2051  
0.2051  
0.2053  
0.2053  
0.2053  
0.2053  
0.2053  
0.2053  
0.2054  
0.2054  
0.2059  
0.2059  
0.2059  
0.2059  
0.2059  
0.2059  
0.2061  
0.2062  
0.2063  
0.2063  
0.2063  
0.2063  
0.2063  
0.2063  
0.2064  
0.2064  
0.2064

0.2064  
0.2064  
0.2064  
0.2067  
0.2067  
0.2067  
0.2068  
0.2068  
0.2068  
0.2071  
0.2071  
0.2071  
0.2071  
0.2071  
0.2071  
0.2073  
0.2074  
0.2074  
0.2078  
0.2078  
0.2080  
0.2080  
0.2080  
0.2080  
0.2080  
0.2080  
0.2080  
0.2080  
0.2080  
0.2080  
0.2080  
0.2080  
0.2080  
0.2080  
0.2080  
0.2080  
0.2080  
0.2080  
0.2080  
0.2080  
0.2080  
0.2086  
0.2086  
0.2087  
0.2087  
0.2088  
0.2088  
0.2088  
0.2088  
0.2089  
0.2089

0.2089  
0.2089  
0.2089  
0.2093  
0.2093  
0.2094  
0.2095  
0.2095  
0.2095  
0.2095  
0.2095  
0.2095  
0.2095  
0.2095  
0.2095  
0.2095  
0.2095  
0.2095  
0.2096  
0.2096  
0.2096  
0.2105  
0.2105  
0.2105  
0.2110  
0.2110  
0.2111  
0.2111  
0.2111  
0.2111  
0.2111  
0.2113  
0.2113  
0.2113  
0.2113  
0.2113  
0.2113  
0.2113  
0.2113  
0.2113  
0.2114  
0.2114  
0.2114  
0.2114  
0.2114  
0.2117  
0.2117  
0.2117  
0.2118

0.2123  
0.2123  
0.2123  
0.2128  
0.2128  
0.2128  
0.2132  
0.2132  
0.2132  
0.2133  
0.2136  
0.2138  
0.2138  
0.2138  
0.2138  
0.2141  
0.2141  
0.2141  
0.2142  
0.2142  
0.2142  
0.2143  
0.2143  
0.2143  
0.2146  
0.2146  
0.2146  
0.2146  
0.2146  
0.2146  
0.2146  
0.2149  
0.2150  
0.2152  
0.2152  
0.2156  
0.2156  
0.2156  
0.2158  
0.2158  
0.2158  
0.2158  
0.2160  
0.2160  
0.2164  
0.2166  
0.2168  
0.2170  
0.2171  
0.2172

0.2175  
0.2175  
0.2175  
0.2177  
0.2180  
0.2180  
0.2180  
0.2183  
0.2183  
0.2183  
0.2183  
0.2184  
0.2185  
0.2186  
0.2186  
0.2188  
0.2188  
0.2190  
0.2190  
0.2191  
0.2194  
0.2198  
0.2200  
0.2201  
0.2204  
0.2204  
0.2208  
0.2208  
0.2208  
0.2210  
0.2210  
0.2210  
0.2210  
0.2211  
0.2213  
0.2214  
0.2214  
0.2216  
0.2219  
0.2222  
0.2223  
0.2223  
0.2223  
0.2223  
0.2223  
0.2223  
0.2223  
0.2223  
0.2223





[illegible]



0.2281  
0.2281  
0.2281  
0.2281  
0.2281  
0.2281  
0.2281  
0.2281  
0.2282  
0.2282  
0.2282  
0.2283  
0.2283  
0.2283  
0.2283  
0.2284  
0.2284  
0.2284  
0.2284  
0.2285  
0.2285  
0.2285  
0.2286  
0.2286  
0.2286  
0.2286  
0.2289  
0.2289  
0.2291  
0.2291  
0.2293  
0.2293  
0.2293  
0.2294  
0.2294  
0.2294  
0.2296  
0.2297  
0.2297  
0.2297  
0.2297  
0.2297  
0.2297  
0.2297  
0.2297  
0.2297  
0.2297  
0.2298  
0.2301  
0.2302  
0.2302  
0.2304  
0.2304

0.2305  
0.2305  
0.2312  
0.2313  
0.2315  
0.2318  
0.2318  
0.2318  
0.2318  
0.2319  
0.2320  
0.2324  
0.2324  
0.2325  
0.2325  
0.2325  
0.2326  
0.2326  
0.2326  
0.2326  
0.2326  
0.2326  
0.2326  
0.2326  
0.2326  
0.2326  
0.2327  
0.2327  
0.2328  
0.2329  
0.2329  
0.2329  
0.2329  
0.2329  
0.2329  
0.2329  
0.2329  
0.2330  
0.2333  
0.2333  
0.2333  
0.2333  
0.2335  
0.2335  
0.2335  
0.2335  
0.2336  
0.2337  
0.2338  
0.2338  
0.2342  
0.2343

0.2344  
0.2347  
0.2347  
0.2347  
0.2347  
0.2347  
0.2347  
0.2347  
0.2347  
0.2347  
0.2347  
0.2351  
0.2352  
0.2352  
0.2354  
0.2354  
0.2354  
0.2355  
0.2356  
0.2356  
0.2358  
0.2359  
0.2364  
0.2366  
0.2366  
0.2366  
0.2366  
0.2366  
0.2366  
0.2366  
0.2366  
0.2366  
0.2366  
0.2366  
0.2366  
0.2366  
0.2366  
0.2366  
0.2367  
0.2371  
0.2371  
0.2371  
0.2371  
0.2371  
0.2372  
0.2374  
0.2374  
0.2375  
0.2375  
0.2375  
0.2379  
0.2379  
0.2379

0.2379  
0.2379  
0.2379  
0.2379  
0.2379  
0.2379  
0.2379  
0.2380  
0.2380  
0.2380  
0.2381  
0.2381  
0.2381  
0.2381  
0.2382  
0.2384  
0.2387  
0.2391  
0.2391  
0.2394  
0.2395  
0.2396  
0.2396  
0.2399  
0.2400  
0.2400  
0.2400  
0.2401  
0.2401  
0.2401  
0.2402  
0.2403  
0.2403  
0.2404  
0.2407  
0.2407  
0.2407  
0.2407  
0.2407  
0.2409  
0.2410  
0.2410  
0.2410  
0.2411  
0.2411  
0.2411  
0.2412  
0.2412  
0.2412  
0.2412





0.2438  
0.2438  
0.2438  
0.2439  
0.2439  
0.2439  
0.2439  
0.2439  
0.2440  
0.2440  
0.2440  
0.2440  
0.2440  
0.2440  
0.2440  
0.2441  
0.2441  
0.2441  
0.2441  
0.2441  
0.2441  
0.2441  
0.2441  
0.2441  
0.2441  
0.2441  
0.2441  
0.2441  
0.2441  
0.2441  
0.2441  
0.2441  
0.2441  
0.2441  
0.2442  
0.2442  
0.2442  
0.2442  
0.2442  
0.2442  
0.2442  
0.2442  
0.2442  
0.2442  
0.2442  
0.2442  
0.2442  
0.2442  
0.2442  
0.2443  
0.2447  
0.2447  
0.2448  
0.2448  
0.2449

0.2452  
0.2453  
0.2454  
0.2454  
0.2454  
0.2454  
0.2454  
0.2454  
0.2454  
0.2457  
0.2457  
0.2457  
0.2457  
0.2457  
0.2457  
0.2459  
0.2459  
0.2460  
0.2463  
0.2465  
0.2472  
0.2472  
0.2473  
0.2473  
0.2475  
0.2475  
0.2476  
0.2478  
0.2478  
0.2478  
0.2478  
0.2479  
0.2480  
0.2481  
0.2483  
0.2483  
0.2484  
0.2486  
0.2487  
0.2488  
0.2488  
0.2488  
0.2491  
0.2491  
0.2491  
0.2492  
0.2493  
0.2495  
0.2495



[illegible]

[illegible]

0.2536  
0.2536  
0.2537  
0.2537  
0.2537  
0.2537  
0.2538  
0.2538  
0.2538  
0.2538  
0.2538  
0.2538  
0.2538  
0.2538  
0.2538  
0.2541  
0.2545  
0.2547  
0.2547  
0.2547  
0.2547  
0.2547  
0.2548  
0.2548  
0.2548  
0.2548  
0.2549  
0.2549  
0.2550  
0.2550  
0.2550  
0.2550  
0.2550  
0.2550  
0.2550  
0.2551  
0.2551  
0.2551  
0.2552  
0.2553  
0.2553  
0.2553  
0.2553  
0.2554  
0.2555  
0.2558  
0.2558  
0.2558  
0.2560  
0.2560  
0.2560  
0.2561



0.2598  
0.2598  
0.2598  
0.2598  
0.2601  
0.2606  
0.2609  
0.2610  
0.2610  
0.2610  
0.2610  
0.2612  
0.2612  
0.2612  
0.2612  
0.2612  
0.2614  
0.2614  
0.2616  
0.2617  
0.2617  
0.2617  
0.2618  
0.2620  
0.2621  
0.2624  
0.2624  
0.2625  
0.2625  
0.2625  
0.2625  
0.2625  
0.2625  
0.2625  
0.2629  
0.2632  
0.2634  
0.2634  
0.2634  
0.2634  
0.2634  
0.2634  
0.2634  
0.2636  
0.2636  
0.2638  
0.2638  
0.2638  
0.2638  
0.2638  
0.2638  
0.2639



0.2639  
0.2639  
0.2639  
0.2639  
0.2639  
0.2639  
0.2639  
0.2640  
0.2640  
0.2640  
0.2640  
0.2640  
0.2640  
0.2640  
0.2640  
0.2640  
0.2640  
0.2640  
0.2640  
0.2640  
0.2640  
0.2643  
0.2643  
0.2643  
0.2644  
0.2645  
0.2645  
0.2646  
0.2646  
0.2646  
0.2646  
0.2646  
0.2646  
0.2646  
0.2646  
0.2646  
0.2646  
0.2646  
0.2646  
0.2646  
0.2646  
0.2646  
0.2646  
0.2646  
0.2646  
0.2647  
0.2648  
0.2650  
0.2650  
0.2650  
0.2654

[illegible]

0.2672  
0.2674  
0.2674  
0.2674  
0.2674  
0.2675  
0.2675  
0.2676  
0.2676  
0.2676  
0.2676  
0.2677  
0.2677  
0.2677  
0.2677  
0.2677  
0.2677  
0.2678  
0.2678  
0.2678  
0.2678  
0.2678  
0.2679  
0.2680  
0.2684  
0.2684  
0.2684  
0.2685  
0.2685  
0.2685  
0.2686  
0.2686  
0.2688  
0.2688  
0.2688  
0.2688  
0.2689  
0.2691  
0.2691  
0.2695  
0.2696  
0.2698  
0.2699  
0.2700  
0.2703  
0.2704  
0.2704  
0.2704  
0.2704  
0.2704  
0.2704

0.2704  
0.2704  
0.2704  
0.2704  
0.2704  
0.2706  
0.2707  
0.2707  
0.2707  
0.2709  
0.2709  
0.2711  
0.2714  
0.2717  
0.2717  
0.2717  
0.2717  
0.2717  
0.2722  
0.2722  
0.2722  
0.2722  
0.2722  
0.2723  
0.2723  
0.2730  
0.2732  
0.2732  
0.2732  
0.2732  
0.2732  
0.2732  
0.2736  
0.2736  
0.2736  
0.2736  
0.2736  
0.2736  
0.2738  
0.2742  
0.2743  
0.2744  
0.2744  
0.2744  
0.2744  
0.2746  
0.2746  
0.2747  
0.2748  
0.2748  
0.2748  
0.2748

0.2750  
0.2753  
0.2753  
0.2754  
0.2756  
0.2757  
0.2758  
0.2759  
0.2759  
0.2759  
0.2759  
0.2759  
0.2760  
0.2760  
0.2763  
0.2763  
0.2764  
0.2767  
0.2767  
0.2767  
0.2768  
0.2768  
0.2768  
0.2768  
0.2770  
0.2770  
0.2772  
0.2772  
0.2772  
0.2772  
0.2772  
0.2772  
0.2772  
0.2772  
0.2772  
0.2772  
0.2772  
0.2773  
0.2774  
0.2778  
0.2779  
0.2781  
0.2782  
0.2782  
0.2782  
0.2782  
0.2784  
0.2784  
0.2784  
0.2784  
0.2784  
0.2784  
0.2784  
0.2784



[illegible]

0.2817  
0.2817  
0.2817  
0.2817  
0.2817  
0.2817  
0.2817  
0.2818  
0.2818  
0.2818  
0.2819  
0.2820  
0.2821  
0.2821  
0.2821  
0.2821  
0.2822  
0.2823  
0.2823  
0.2823  
0.2823  
0.2823  
0.2823  
0.2824  
0.2824  
0.2824  
0.2824  
0.2824  
0.2824  
0.2825  
0.2825  
0.2825  
0.2825  
0.2825  
0.2825  
0.2825  
0.2825  
0.2825  
0.2826  
0.2827  
0.2832  
0.2832  
0.2834  
0.2834  
0.2836  
0.2837  
0.2839  
0.2839  
0.2843  
0.2843  
0.2843  
0.2843





[illegible]

|        |  |
|--------|--|
| 0.2886 |  |
| 0.2886 |  |
| 0.2887 |  |
| 0.2890 |  |
| 0.2890 |  |
| 0.2890 |  |
| 0.2892 |  |
| 0.2895 |  |
| 0.2895 |  |
| 0.2898 |  |
| 0.2898 |  |
| 0.2901 |  |
| 0.2901 |  |
| 0.2903 |  |
| 0.2907 |  |
| 0.2908 |  |
| 0.2914 |  |
| 0.2914 |  |
| 0.2914 |  |
| 0.2914 |  |
| 0.2914 |  |
| 0.2914 |  |
| 0.2914 |  |
| 0.2914 |  |
| 0.2915 |  |
| 0.2916 |  |
| 0.2916 |  |
| 0.2916 |  |
| 0.2916 |  |
| 0.2916 |  |
| 0.2918 |  |
| 0.2920 |  |
| 0.2920 |  |
| 0.2922 |  |
| 0.2925 |  |
| 0.2925 |  |
| 0.2927 |  |
| 0.2927 |  |
| 0.2928 |  |
| 0.2929 |  |
| 0.2929 |  |
| 0.2932 |  |
| 0.2932 |  |
| 0.2932 |  |
| 0.2932 |  |
| 0.2935 |  |
| 0.2936 |  |
| 0.2938 |  |
| 0.2938 |  |
| 0.2939 |  |



0.2961  
0.2961  
0.2961  
0.2961  
0.2961  
0.2961  
0.2961  
0.2963  
0.2965  
0.2968  
0.2968  
0.2969  
0.2969  
0.2969  
0.2969  
0.2969  
0.2969  
0.2971  
0.2971  
0.2972  
0.2973  
0.2975  
0.2980  
0.2981  
0.2981  
0.2981  
0.2983  
0.2983  
0.2984  
0.2985  
0.2986  
0.2987  
0.2987  
0.2987  
0.2987  
0.2987  
0.2991  
0.2991  
0.2992  
0.2992  
0.2994  
0.2994  
0.2994  
0.2994  
0.2996  
0.3000  
0.3000  
0.3001  
0.3001  
0.3001

0.3002  
0.3002  
0.3002  
0.3002  
0.3002  
0.3002  
0.3003  
0.3003  
0.3004  
0.3005  
0.3006  
0.3008  
0.3008  
0.3010  
0.3012  
0.3012  
0.3012  
0.3012  
0.3012  
0.3014  
0.3014  
0.3016  
0.3020  
0.3021  
0.3021  
0.3021  
0.3021  
0.3021  
0.3021  
0.3025  
0.3026  
0.3028  
0.3028  
0.3028  
0.3028  
0.3028  
0.3028  
0.3028  
0.3028  
0.3028  
0.3028  
0.3028  
0.3028  
0.3029  
0.3029  
0.3030  
0.3030  
0.3030  
0.3030  
0.3033  
0.3033  
0.3033

[illegible]

0.3069  
0.3069  
0.3073  
0.3074  
0.3075  
0.3077  
0.3077  
0.3077  
0.3077  
0.3078  
0.3078  
0.3078  
0.3078  
0.3081  
0.3083  
0.3084  
0.3087  
0.3088  
0.3089  
0.3093  
0.3094  
0.3094  
0.3095  
0.3095  
0.3095  
0.3095  
0.3095  
0.3095  
0.3096  
0.3096  
0.3099  
0.3100  
0.3101  
0.3101  
0.3102  
0.3102  
0.3102  
0.3104  
0.3104  
0.3104  
0.3107  
0.3108  
0.3108  
0.3108  
0.3108  
0.3108  
0.3109  
0.3109  
0.3109  
0.3110



0.3110  
0.3110  
0.3110  
0.3110  
0.3110  
0.3110  
0.3110  
0.3111  
0.3112  
0.3112  
0.3112  
0.3112  
0.3112  
0.3112  
0.3114  
0.3114  
0.3115  
0.3117  
0.3118  
0.3120  
0.3120  
0.3120  
0.3120  
0.3120  
0.3120  
0.3120  
0.3120  
0.3120  
0.3120  
0.3122  
0.3126  
0.3126  
0.3126  
0.3128  
0.3128  
0.3128  
0.3128  
0.3129  
0.3129  
0.3129  
0.3129  
0.3129  
0.3129  
0.3129  
0.3129  
0.3129  
0.3130  
0.3130  
0.3136  
0.3136  
0.3136  
0.3136  
0.3136  
0.3136  
0.3138

0.3141  
0.3142  
0.3142  
0.3143  
0.3143  
0.3143  
0.3144  
0.3144  
0.3144  
0.3144  
0.3145  
0.3145  
0.3145  
0.3145  
0.3145  
0.3145  
0.3145  
0.3145  
0.3145  
0.3147  
0.3147  
0.3147  
0.3151  
0.3151  
0.3151  
0.3153  
0.3155  
0.3155  
0.3155  
0.3157  
0.3157  
0.3157  
0.3157  
0.3158  
0.3161  
0.3161  
0.3161  
0.3161  
0.3162  
0.3162  
0.3162  
0.3162  
0.3163  
0.3163  
0.3163  
0.3163  
0.3163  
0.3165  
0.3168  
0.3168



0.3222  
0.3224  
0.3224  
0.3225  
0.3225  
0.3225  
0.3230  
0.3230  
0.3231  
0.3231  
0.3231  
0.3231  
0.3231  
0.3231  
0.3231  
0.3232  
0.3234  
0.3236  
0.3238  
0.3238  
0.3238  
0.3238  
0.3238  
0.3239  
0.3239  
0.3241  
0.3241  
0.3241  
0.3246  
0.3247  
0.3247  
0.3247  
0.3247  
0.3247  
0.3247  
0.3247  
0.3247  
0.3247  
0.3249  
0.3249  
0.3249  
0.3249  
0.3249  
0.3251  
0.3252  
0.3252  
0.3252  
0.3253  
0.3253  
0.3256

0.3256  
0.3256  
0.3258  
0.3263  
0.3263  
0.3264  
0.3264  
0.3264  
0.3264  
0.3265  
0.3268  
0.3268  
0.3269  
0.3269  
0.3269  
0.3269  
0.3269  
0.3270  
0.3270  
0.3273  
0.3273  
0.3273  
0.3275  
0.3275  
0.3275  
0.3275  
0.3278  
0.3278  
0.3278  
0.3283  
0.3285  
0.3286  
0.3286  
0.3289  
0.3289  
0.3289  
0.3289  
0.3290  
0.3290  
0.3291  
0.3291  
0.3291  
0.3291  
0.3291  
0.3291  
0.3291  
0.3292  
0.3294  
0.3295  
0.3295  
0.3296

0.3297  
0.3297  
0.3302  
0.3302  
0.3302  
0.3302  
0.3302  
0.3303  
0.3303  
0.3303  
0.3304  
0.3306  
0.3308  
0.3309  
0.3309  
0.3309  
0.3311  
0.3311  
0.3313  
0.3315  
0.3315  
0.3315  
0.3315  
0.3316  
0.3317  
0.3319  
0.3320  
0.3322  
0.3322  
0.3322  
0.3324  
0.3326  
0.3327  
0.3327  
0.3327  
0.3327  
0.3327  
0.3328  
0.3328  
0.3328  
0.3328  
0.3328  
0.3328  
0.3330  
0.3330  
0.3331  
0.3331  
0.3331  
0.3331

0.3331  
0.3331  
0.3335  
0.3339  
0.3339  
0.3339  
0.3339  
0.3341  
0.3341  
0.3342  
0.3342  
0.3342  
0.3342  
0.3342  
0.3342  
0.3347  
0.3347  
0.3347  
0.3347  
0.3347  
0.3347  
0.3347  
0.3347  
0.3347  
0.3348  
0.3349  
0.3349  
0.3349  
0.3349  
0.3349  
0.3349  
0.3351  
0.3351  
0.3356  
0.3357  
0.3357  
0.3358  
0.3358  
0.3358  
0.3358  
0.3360  
0.3361  
0.3362  
0.3364  
0.3366  
0.3366  
0.3366  
0.3366  
0.3366  
0.3366  
0.3366

0.3366  
0.3366  
0.3366  
0.3369  
0.3370  
0.3373  
0.3377  
0.3377  
0.3379  
0.3379  
0.3379  
0.3379  
0.3379  
0.3379  
0.3379  
0.3379  
0.3379  
0.3379  
0.3379  
0.3379  
0.3379  
0.3379  
0.3381  
0.3381  
0.3381  
0.3381  
0.3381  
0.3382  
0.3385  
0.3387  
0.3387  
0.3387  
0.3388  
0.3388  
0.3388  
0.3388  
0.3390  
0.3390  
0.3390  
0.3396  
0.3396  
0.3399  
0.3401  
0.3401  
0.3402  
0.3402  
0.3402  
0.3402





0.3437  
0.3438  
0.3439  
0.3439  
0.3442  
0.3445  
0.3445  
0.3446  
0.3447  
0.3447  
0.3447  
0.3447  
0.3447  
0.3452  
0.3453  
0.3454  
0.3455  
0.3455  
0.3455  
0.3455  
0.3455  
0.3458  
0.3458  
0.3458  
0.3458  
0.3458  
0.3458  
0.3459  
0.3462  
0.3462  
0.3462  
0.3465  
0.3465  
0.3465  
0.3466  
0.3468  
0.3468  
0.3468  
0.3469  
0.3469  
0.3469  
0.3471  
0.3472  
0.3472  
0.3472  
0.3472  
0.3472  
0.3472  
0.3472  
0.3472

0.3477  
0.3477  
0.3479  
0.3480  
0.3480  
0.3482  
0.3484  
0.3485  
0.3485  
0.3485  
0.3485  
0.3485  
0.3486  
0.3486  
0.3486  
0.3486  
0.3487  
0.3489  
0.3490  
0.3494  
0.3495  
0.3496  
0.3496  
0.3498  
0.3500  
0.3500  
0.3500  
0.3500  
0.3500  
0.3500  
0.3500  
0.3500  
0.3500  
0.3501  
0.3503  
0.3504  
0.3504  
0.3504  
0.3505  
0.3505  
0.3506  
0.3506  
0.3507  
0.3508  
0.3509  
0.3509  
0.3512  
0.3518  
0.3518  
0.3518

0.3520  
0.3520  
0.3520  
0.3520  
0.3522  
0.3524  
0.3524  
0.3524  
0.3524  
0.3524  
0.3527  
0.3527  
0.3527  
0.3527  
0.3527  
0.3529  
0.3529  
0.3533  
0.3533  
0.3533  
0.3533  
0.3533  
0.3533  
0.3533  
0.3533  
0.3533  
0.3534  
0.3535  
0.3537  
0.3537  
0.3538  
0.3538  
0.3538  
0.3538  
0.3538  
0.3538  
0.3538  
0.3543  
0.3548  
0.3549  
0.3549  
0.3549  
0.3549  
0.3549  
0.3549  
0.3549  
0.3549  
0.3550  
0.3552  
0.3552  
0.3557  
0.3558  
0.3558

0.3559  
0.3560  
0.3560  
0.3560  
0.3565  
0.3565  
0.3566  
0.3567  
0.3567  
0.3567  
0.3567  
0.3567  
0.3568  
0.3568  
0.3569  
0.3569  
0.3572  
0.3572  
0.3572  
0.3574  
0.3574  
0.3574  
0.3574  
0.3574  
0.3575  
0.3575  
0.3575  
0.3577  
0.3577  
0.3577  
0.3581  
0.3581  
0.3581  
0.3581  
0.3581  
0.3581  
0.3581  
0.3581  
0.3581  
0.3581  
0.3583  
0.3583  
0.3585  
0.3585  
0.3585  
0.3585  
0.3585  
0.3585  
0.3587

[illegible]

0.3625  
0.3625  
0.3626  
0.3626  
0.3626  
0.3631  
0.3634  
0.3640  
0.3643  
0.3644  
0.3644  
0.3644  
0.3645  
0.3645  
0.3645  
0.3645  
0.3645  
0.3645  
0.3645  
0.3646  
0.3646  
0.3646  
0.3648  
0.3648  
0.3649  
0.3649  
0.3651  
0.3652  
0.3652  
0.3652  
0.3652  
0.3654  
0.3654  
0.3655  
0.3655  
0.3656  
0.3657  
0.3658  
0.3659  
0.3659  
0.3659  
0.3659  
0.3659  
0.3659  
0.3660  
0.3660  
0.3660  
0.3661  
0.3661  
0.3663

0.3663  
0.3663  
0.3663  
0.3665  
0.3665  
0.3666  
0.3666  
0.3666  
0.3667  
0.3667  
0.3667  
0.3667  
0.3669  
0.3673  
0.3675  
0.3675  
0.3675  
0.3675  
0.3676  
0.3677  
0.3677  
0.3677  
0.3680  
0.3680  
0.3680  
0.3681  
0.3681  
0.3682  
0.3685  
0.3686  
0.3686  
0.3687  
0.3687  
0.3687  
0.3687  
0.3687  
0.3689  
0.3689  
0.3689  
0.3689  
0.3695  
0.3701  
0.3703  
0.3705  
0.3705  
0.3705  
0.3705  
0.3705  
0.3705  
0.3705  
0.3705



0.3705  
0.3706  
0.3706  
0.3708  
0.3708  
0.3710  
0.3710  
0.3710  
0.3710  
0.3711  
0.3713  
0.3714  
0.3714  
0.3714  
0.3714  
0.3714  
0.3714  
0.3714  
0.3716  
0.3718  
0.3719  
0.3722  
0.3722  
0.3726  
0.3726  
0.3726  
0.3726  
0.3726  
0.3726  
0.3727  
0.3730  
0.3730  
0.3732  
0.3734  
0.3736  
0.3736  
0.3737  
0.3737  
0.3737  
0.3737  
0.3737  
0.3737  
0.3738  
0.3738  
0.3740  
0.3740  
0.3741  
0.3741  
0.3742  
0.3742  
0.3747  
0.3747

0.3747  
0.3747  
0.3747  
0.3747  
0.3747  
0.3747  
0.3747  
0.3748  
0.3749  
0.3750  
0.3750  
0.3750  
0.3750  
0.3750  
0.3750  
0.3751  
0.3755  
0.3756  
0.3756  
0.3756  
0.3756  
0.3756  
0.3756  
0.3757  
0.3757  
0.3758  
0.3759  
0.3759  
0.3759  
0.3759  
0.3760  
0.3760  
0.3760  
0.3762  
0.3763  
0.3763  
0.3763  
0.3765  
0.3765  
0.3767  
0.3767  
0.3767  
0.3768  
0.3768  
0.3768  
0.3768  
0.3771  
0.3773  
0.3774  
0.3774  
0.3774

0.3774  
0.3774  
0.3774  
0.3774  
0.3776  
0.3779  
0.3779  
0.3779  
0.3779  
0.3780  
0.3780  
0.3780  
0.3782  
0.3783  
0.3783  
0.3783  
0.3783  
0.3783  
0.3783  
0.3783  
0.3785  
0.3786  
0.3786  
0.3786  
0.3786  
0.3789  
0.3789  
0.3791  
0.3794  
0.3794  
0.3794  
0.3794  
0.3795  
0.3795  
0.3795  
0.3796  
0.3799  
0.3801  
0.3803  
0.3804  
0.3804  
0.3805  
0.3805  
0.3805  
0.3805  
0.3805  
0.3805  
0.3806  
0.3806  
0.3807  
0.3808  
0.3809  
0.3809

|        |  |
|--------|--|
| 0.3809 |  |
| 0.3809 |  |
| 0.3812 |  |
| 0.3812 |  |
| 0.3812 |  |
| 0.3814 |  |
| 0.3814 |  |
| 0.3814 |  |
| 0.3815 |  |
| 0.3815 |  |
| 0.3815 |  |
| 0.3815 |  |
| 0.3815 |  |
| 0.3815 |  |
| 0.3818 |  |
| 0.3818 |  |
| 0.3818 |  |
| 0.3819 |  |
| 0.3819 |  |
| 0.3819 |  |
| 0.3823 |  |
| 0.3823 |  |
| 0.3823 |  |
| 0.3823 |  |
| 0.3823 |  |
| 0.3824 |  |
| 0.3824 |  |
| 0.3824 |  |
| 0.3824 |  |
| 0.3825 |  |
| 0.3827 |  |
| 0.3827 |  |
| 0.3827 |  |
| 0.3827 |  |
| 0.3827 |  |
| 0.3828 |  |
| 0.3828 |  |
| 0.3828 |  |
| 0.3830 |  |
| 0.3830 |  |
| 0.3830 |  |
| 0.3830 |  |
| 0.3830 |  |
| 0.3832 |  |
| 0.3833 |  |
| 0.3834 |  |
| 0.3835 |  |
| 0.3836 |  |
| 0.3837 |  |
| 0.3837 |  |

|        |  |
|--------|--|
| 0.3837 |  |
| 0.3839 |  |
| 0.3839 |  |
| 0.3840 |  |
| 0.3840 |  |
| 0.3840 |  |
| 0.3840 |  |
| 0.3840 |  |
| 0.3840 |  |
| 0.3840 |  |
| 0.3841 |  |
| 0.3841 |  |
| 0.3841 |  |
| 0.3841 |  |
| 0.3841 |  |
| 0.3841 |  |
| 0.3841 |  |
| 0.3842 |  |
| 0.3842 |  |
| 0.3842 |  |
| 0.3843 |  |
| 0.3845 |  |
| 0.3845 |  |
| 0.3847 |  |
| 0.3847 |  |
| 0.3848 |  |
| 0.3849 |  |
| 0.3852 |  |
| 0.3852 |  |
| 0.3852 |  |
| 0.3852 |  |
| 0.3855 |  |
| 0.3855 |  |
| 0.3856 |  |
| 0.3856 |  |
| 0.3857 |  |
| 0.3857 |  |
| 0.3858 |  |
| 0.3859 |  |
| 0.3859 |  |
| 0.3861 |  |
| 0.3861 |  |
| 0.3863 |  |
| 0.3863 |  |
| 0.3865 |  |
| 0.3867 |  |
| 0.3867 |  |
| 0.3867 |  |
| 0.3870 |  |
| 0.3872 |  |
| 0.3874 |  |

[illegible]

0.3912  
0.3912  
0.3912  
0.3913  
0.3913  
0.3913  
0.3913  
0.3913  
0.3913  
0.3913  
0.3913  
0.3914  
0.3914  
0.3914  
0.3915  
0.3915  
0.3915  
0.3915  
0.3915  
0.3915  
0.3915  
0.3916  
0.3916  
0.3916  
0.3916  
0.3916  
0.3918  
0.3918  
0.3918  
0.3918  
0.3918  
0.3918  
0.3918  
0.3919  
0.3920  
0.3921  
0.3922  
0.3922  
0.3922  
0.3922  
0.3922  
0.3922  
0.3923  
0.3925  
0.3925  
0.3928  
0.3928  
0.3932  
0.3932  
0.3932  
0.3932  
0.3932

0.3932  
0.3932  
0.3932  
0.3932  
0.3932  
0.3932  
0.3932  
0.3932  
0.3933  
0.3936  
0.3942  
0.3942  
0.3944  
0.3944  
0.3945  
0.3945  
0.3945  
0.3945  
0.3945  
0.3946  
0.3946  
0.3949  
0.3950  
0.3953  
0.3954  
0.3955  
0.3958  
0.3960  
0.3960  
0.3964  
0.3964  
0.3966  
0.3966  
0.3969  
0.3969  
0.3969  
0.3971  
0.3972  
0.3972  
0.3973  
0.3973  
0.3974  
0.3974  
0.3974  
0.3976  
0.3976  
0.3976  
0.3976  
0.3977



0.3977  
0.3977  
0.3977  
0.3977  
0.3977  
0.3977  
0.3977  
0.3977  
0.3977  
0.3977  
0.3977  
0.3977  
0.3981  
0.3981  
0.3981  
0.3981  
0.3981  
0.3987  
0.3987  
0.3987  
0.3987  
0.3987  
0.3987  
0.3987  
0.3987  
0.3987  
0.3989  
0.3989  
0.3989  
0.3989  
0.3989  
0.3990  
0.3990  
0.3990  
0.3991  
0.3992  
0.3992  
0.3992  
0.3992  
0.3992  
0.3992  
0.3992  
0.3992  
0.3992  
0.3996  
0.3996  
0.3996  
0.3996  
0.3997



0.4029  
0.4029  
0.4030  
0.4030  
0.4035  
0.4035  
0.4035  
0.4035  
0.4035  
0.4035  
0.4035  
0.4035  
0.4035  
0.4035  
0.4035  
0.4035  
0.4035  
0.4035  
0.4035  
0.4035  
0.4035  
0.4041  
0.4041  
0.4041  
0.4041  
0.4041  
0.4041  
0.4041  
0.4041  
0.4043  
0.4043  
0.4047  
0.4047  
0.4047  
0.4048  
0.4048  
0.4048  
0.4048  
0.4048  
0.4048  
0.4050  
0.4050  
0.4050  
0.4050  
0.4053  
0.4053  
0.4055  
0.4058  
0.4060  
0.4061  
0.4063

0.4063  
0.4064  
0.4064  
0.4064  
0.4064  
0.4064  
0.4064  
0.4064  
0.4064  
0.4065  
0.4070  
0.4070  
0.4070  
0.4070  
0.4070  
0.4072  
0.4072  
0.4072  
0.4073  
0.4073  
0.4073  
0.4073  
0.4073  
0.4073  
0.4073  
0.4073  
0.4073  
0.4073  
0.4073  
0.4073  
0.4073  
0.4073  
0.4073  
0.4073  
0.4073  
0.4073  
0.4073  
0.4073  
0.4073  
0.4074  
0.4074  
0.4074  
0.4074  
0.4076  
0.4076  
0.4076  
0.4076  
0.4079  
0.4080  
0.4080  
0.4082  
0.4082

[illegible]

0.4122  
0.4122  
0.4122  
0.4123  
0.4123  
0.4123  
0.4123  
0.4127  
0.4128  
0.4128  
0.4129  
0.4133  
0.4133  
0.4133  
0.4136  
0.4141  
0.4141  
0.4142  
0.4143  
0.4144  
0.4146  
0.4146  
0.4146  
0.4146  
0.4146  
0.4146  
0.4148  
0.4150  
0.4150  
0.4150  
0.4150  
0.4150  
0.4150  
0.4155  
0.4155  
0.4155  
0.4155  
0.4155  
0.4155  
0.4156  
0.4156  
0.4156  
0.4156  
0.4156  
0.4161  
0.4161  
0.4162  
0.4162  
0.4163  
0.4165

0.4165  
0.4165  
0.4168  
0.4168  
0.4168  
0.4170  
0.4170  
0.4170  
0.4172  
0.4172  
0.4173  
0.4173  
0.4173  
0.4175  
0.4175  
0.4176  
0.4177  
0.4178  
0.4180  
0.4180  
0.4183  
0.4183  
0.4183  
0.4183  
0.4183  
0.4183  
0.4184  
0.4184  
0.4184  
0.4184  
0.4184  
0.4184  
0.4184  
0.4184  
0.4184  
0.4184  
0.4184  
0.4187  
0.4188  
0.4189  
0.4189  
0.4189  
0.4189  
0.4191  
0.4193  
0.4193  
0.4193  
0.4195  
0.4195  
0.4197  
0.4198





0.4229  
0.4233  
0.4234  
0.4237  
0.4237  
0.4237  
0.4238  
0.4238  
0.4240  
0.4241  
0.4241  
0.4243  
0.4243  
0.4244  
0.4244  
0.4244  
0.4256  
0.4256  
0.4259  
0.4260  
0.4260  
0.4260  
0.4260  
0.4260  
0.4260  
0.4263  
0.4263  
0.4263  
0.4263  
0.4263  
0.4263  
0.4263  
0.4263  
0.4263  
0.4265  
0.4267  
0.4271  
0.4272  
0.4272  
0.4272  
0.4272  
0.4272  
0.4272  
0.4272  
0.4274  
0.4274  
0.4274  
0.4274  
0.4275  
0.4277  
0.4281

0.4281  
0.4281  
0.4281  
0.4284  
0.4285  
0.4286  
0.4286  
0.4286  
0.4286  
0.4286  
0.4286  
0.4288  
0.4288  
0.4288  
0.4288  
0.4289  
0.4290  
0.4294  
0.4294  
0.4294  
0.4294  
0.4299  
0.4301  
0.4301  
0.4301  
0.4301  
0.4302  
0.4302  
0.4302  
0.4303  
0.4303  
0.4303  
0.4303  
0.4303  
0.4303  
0.4303  
0.4303  
0.4303  
0.4303  
0.4303  
0.4303  
0.4303  
0.4303  
0.4303  
0.4303  
0.4303  
0.4304  
0.4304  
0.4305  
0.4305  
0.4305  
0.4305  
0.4305



0.4317  
0.4317  
0.4317  
0.4319  
0.4319  
0.4319  
0.4319  
0.4319  
0.4323  
0.4323  
0.4323  
0.4324  
0.4328  
0.4328  
0.4328  
0.4328  
0.4328  
0.4328  
0.4329  
0.4330  
0.4330  
0.4331  
0.4331  
0.4331  
0.4331  
0.4331  
0.4331  
0.4339  
0.4340  
0.4340  
0.4341  
0.4341  
0.4342  
0.4343  
0.4346  
0.4348  
0.4348  
0.4350  
0.4351  
0.4354  
0.4354  
0.4358  
0.4358  
0.4359  
0.4363  
0.4366  
0.4366  
0.4366  
0.4366  
0.4367  
0.4369



0.4404  
0.4404  
0.4404  
0.4404  
0.4404  
0.4405  
0.4407  
0.4407  
0.4413  
0.4413  
0.4413  
0.4413  
0.4414  
0.4414  
0.4414  
0.4415  
0.4416  
0.4416  
0.4416  
0.4416  
0.4416  
0.4422  
0.4422  
0.4422  
0.4422  
0.4422  
0.4422  
0.4422  
0.4422  
0.4422  
0.4422  
0.4422  
0.4423  
0.4427  
0.4427  
0.4428  
0.4429  
0.4429  
0.4429  
0.4429  
0.4430  
0.4430  
0.4431  
0.4432  
0.4436  
0.4438  
0.4438  
0.4438  
0.4439  
0.4439  
0.4439

0.4439  
0.4439  
0.4439  
0.4440  
0.4444  
0.4444  
0.4448  
0.4449  
0.4450  
0.4451  
0.4456  
0.4456  
0.4459  
0.4459  
0.4459  
0.4460  
0.4460  
0.4460  
0.4460  
0.4461  
0.4461  
0.4461  
0.4461  
0.4461  
0.4461  
0.4462  
0.4463  
0.4464  
0.4464  
0.4467  
0.4467  
0.4467  
0.4467  
0.4467  
0.4467  
0.4467  
0.4467  
0.4468  
0.4468  
0.4469  
0.4469  
0.4471  
0.4471  
0.4471  
0.4472  
0.4475  
0.4475  
0.4475  
0.4476  
0.4476

[illegible]



[illegible]

0.4513  
0.4513  
0.4513  
0.4513  
0.4513  
0.4513  
0.4513  
0.4513  
0.4513  
0.4513  
0.4513  
0.4513  
0.4513  
0.4515  
0.4515  
0.4515  
0.4515  
0.4515  
0.4515  
0.4515  
0.4515  
0.4515  
0.4517  
0.4517  
0.4517  
0.4518  
0.4518  
0.4518  
0.4518  
0.4518  
0.4520  
0.4520  
0.4520  
0.4521  
0.4521  
0.4521  
0.4526  
0.4526  
0.4526  
0.4529  
0.4529  
0.4529  
0.4529  
0.4529  
0.4529  
0.4531  
0.4532  
0.4532  
0.4532  
0.4532



0.4567  
0.4567  
0.4567  
0.4567  
0.4567  
0.4568  
0.4569  
0.4570  
0.4570  
0.4570  
0.4572  
0.4574  
0.4574  
0.4577  
0.4579  
0.4579  
0.4580  
0.4581  
0.4582  
0.4583  
0.4583  
0.4584  
0.4584  
0.4584  
0.4584  
0.4589  
0.4590  
0.4590  
0.4590  
0.4590  
0.4590  
0.4593  
0.4594  
0.4596  
0.4597  
0.4598  
0.4598  
0.4600  
0.4600  
0.4600  
0.4600  
0.4600  
0.4602  
0.4602  
0.4604  
0.4605  
0.4605  
0.4605  
0.4605  
0.4605

0.4605  
0.4605  
0.4605  
0.4605  
0.4605  
0.4605  
0.4605  
0.4605  
0.4605  
0.4605  
0.4607  
0.4607  
0.4611  
0.4611  
0.4611  
0.4612  
0.4612  
0.4612  
0.4612  
0.4612  
0.4612  
0.4614  
0.4615  
0.4615  
0.4615  
0.4615  
0.4615  
0.4615  
0.4615  
0.4615  
0.4615  
0.4615  
0.4615  
0.4616  
0.4619  
0.4621  
0.4621  
0.4622  
0.4622  
0.4622  
0.4622  
0.4622  
0.4626  
0.4626  
0.4628  
0.4628  
0.4629  
0.4630  
0.4630



0.4665  
0.4665  
0.4668  
0.4668  
0.4668  
0.4668  
0.4668  
0.4668  
0.4669  
0.4671  
0.4674  
0.4678  
0.4682  
0.4684  
0.4686  
0.4686  
0.4687  
0.4687  
0.4687  
0.4687  
0.4687  
0.4687  
0.4688  
0.4688  
0.4689  
0.4689  
0.4690  
0.4695  
0.4695  
0.4695  
0.4695  
0.4695  
0.4695  
0.4696  
0.4697  
0.4697  
0.4697  
0.4697  
0.4697  
0.4698  
0.4700  
0.4700  
0.4700  
0.4700  
0.4702  
0.4702  
0.4705  
0.4705  
0.4705  
0.4705  
0.4705

[illegible]



0.4726  
0.4726  
0.4726  
0.4726  
0.4726  
0.4726  
0.4727  
0.4727  
0.4727  
0.4727  
0.4727  
0.4727  
0.4727  
0.4727  
0.4728  
0.4730  
0.4730  
0.4730  
0.4731  
0.4731  
0.4732  
0.4735  
0.4736  
0.4738  
0.4738  
0.4738  
0.4741  
0.4741  
0.4741  
0.4741  
0.4741  
0.4741  
0.4741  
0.4741  
0.4741  
0.4743  
0.4743  
0.4744  
0.4744  
0.4746  
0.4746  
0.4746  
0.4746  
0.4746  
0.4746  
0.4748  
0.4748  
0.4748  
0.4748  
0.4748  
0.4748  
0.4748

0.4748  
0.4748  
0.4749  
0.4749  
0.4751  
0.4751  
0.4752  
0.4757  
0.4757  
0.4757  
0.4757  
0.4757  
0.4757  
0.4759  
0.4759  
0.4759  
0.4763  
0.4763  
0.4763  
0.4768  
0.4768  
0.4768  
0.4768  
0.4768  
0.4769  
0.4769  
0.4769  
0.4771  
0.4771  
0.4778  
0.4778  
0.4779  
0.4779  
0.4779  
0.4779  
0.4779  
0.4779  
0.4780  
0.4781  
0.4781  
0.4781  
0.4782  
0.4782  
0.4782  
0.4782  
0.4782  
0.4784  
0.4785  
0.4787  
0.4787

0.4792  
0.4792  
0.4792  
0.4792  
0.4792  
0.4794  
0.4794  
0.4794  
0.4799  
0.4800  
0.4800  
0.4802  
0.4803  
0.4803  
0.4803  
0.4805  
0.4808  
0.4808  
0.4808  
0.4808  
0.4808  
0.4808  
0.4808  
0.4810  
0.4811  
0.4811  
0.4812  
0.4812  
0.4815  
0.4815  
0.4815  
0.4815  
0.4820  
0.4820  
0.4827  
0.4827  
0.4828  
0.4829  
0.4829  
0.4831  
0.4832  
0.4832  
0.4832  
0.4833  
0.4833  
0.4833  
0.4833  
0.4833  
0.4833  
0.4833

0.4833  
0.4833  
0.4833  
0.4833  
0.4833  
0.4833  
0.4834  
0.4834  
0.4834  
0.4834  
0.4834  
0.4835  
0.4835  
0.4835  
0.4835  
0.4835  
0.4835  
0.4835  
0.4837  
0.4837  
0.4838  
0.4841  
0.4841  
0.4842  
0.4842  
0.4847  
0.4847  
0.4847  
0.4847  
0.4847  
0.4847  
0.4847  
0.4847  
0.4847  
0.4847  
0.4847  
0.4848  
0.4855  
0.4857  
0.4857  
0.4857  
0.4859  
0.4859  
0.4859  
0.4860  
0.4861  
0.4861  
0.4862  
0.4863  
0.4864

0.4864  
0.4864  
0.4864  
0.4864  
0.4865  
0.4866  
0.4866  
0.4868  
0.4868  
0.4868  
0.4868  
0.4868  
0.4868  
0.4868  
0.4868  
0.4868  
0.4868  
0.4868  
0.4869  
0.4872  
0.4873  
0.4874  
0.4874  
0.4875  
0.4875  
0.4875  
0.4875  
0.4875  
0.4875  
0.4878  
0.4878  
0.4878  
0.4881  
0.4881  
0.4881  
0.4881  
0.4881  
0.4882  
0.4882  
0.4882  
0.4882  
0.4883  
0.4884  
0.4884  
0.4884  
0.4888  
0.4888  
0.4888  
0.4888



0.4936  
0.4936  
0.4936  
0.4937  
0.4937  
0.4940  
0.4941  
0.4942  
0.4945  
0.4945  
0.4947  
0.4947  
0.4947  
0.4948  
0.4950  
0.4950  
0.4953  
0.4955  
0.4956  
0.4957  
0.4957  
0.4959  
0.4959  
0.4961  
0.4963  
0.4964  
0.4968  
0.4968  
0.4970  
0.4971  
0.4972  
0.4974  
0.4975  
0.4978  
0.4981  
0.4981  
0.4981  
0.4981  
0.4981  
0.4982  
0.4982  
0.4982  
0.4983  
0.4983  
0.4983  
0.4983  
0.4983  
0.4985  
0.4985  
0.4985





|        |  |
|--------|--|
| 0.5000 |  |
| 0.5000 |  |
| 0.5000 |  |
| 0.5000 |  |
| 0.5000 |  |
| 0.5001 |  |
| 0.5001 |  |
| 0.5001 |  |
| 0.5001 |  |
| 0.5001 |  |
| 0.5001 |  |
| 0.5001 |  |
| 0.5001 |  |
| 0.5001 |  |
| 0.5001 |  |
| 0.5004 |  |
| 0.5004 |  |
| 0.5010 |  |
| 0.5012 |  |
| 0.5012 |  |
| 0.5012 |  |
| 0.5015 |  |
| 0.5015 |  |
| 0.5015 |  |
| 0.5015 |  |
| 0.5015 |  |
| 0.5015 |  |
| 0.5015 |  |
| 0.5016 |  |
| 0.5016 |  |
| 0.5018 |  |
| 0.5020 |  |
| 0.5022 |  |
| 0.5022 |  |
| 0.5022 |  |
| 0.5023 |  |
| 0.5023 |  |
| 0.5024 |  |
| 0.5024 |  |
| 0.5026 |  |
| 0.5026 |  |
| 0.5026 |  |
| 0.5027 |  |
| 0.5027 |  |
| 0.5028 |  |
| 0.5028 |  |
| 0.5028 |  |
| 0.5029 |  |
| 0.5029 |  |
| 0.5029 |  |
| 0.5029 |  |
| 0.5030 |  |



0.5067  
0.5068  
0.5071  
0.5074  
0.5077  
0.5077  
0.5077  
0.5077  
0.5079  
0.5079  
0.5079  
0.5080  
0.5082  
0.5082  
0.5083  
0.5087  
0.5087  
0.5089  
0.5090  
0.5090  
0.5090  
0.5091  
0.5091  
0.5092  
0.5092  
0.5092  
0.5092  
0.5092  
0.5093  
0.5093  
0.5093  
0.5096  
0.5096  
0.5096  
0.5096  
0.5096  
0.5096  
0.5096  
0.5096  
0.5096  
0.5096  
0.5096  
0.5096  
0.5096  
0.5096  
0.5096  
0.5096  
0.5096  
0.5098  
0.5099  
0.5099  
0.5099  
0.5099

0.5099  
0.5099  
0.5099  
0.5099  
0.5100  
0.5100  
0.5102  
0.5102  
0.5102  
0.5102  
0.5102  
0.5106  
0.5106  
0.5107  
0.5107  
0.5107  
0.5107  
0.5107  
0.5107  
0.5110  
0.5110  
0.5112  
0.5114  
0.5114  
0.5114  
0.5114  
0.5114  
0.5115  
0.5115  
0.5115  
0.5115  
0.5115  
0.5115  
0.5119  
0.5119  
0.5119  
0.5119  
0.5124  
0.5124  
0.5124  
0.5126  
0.5132  
0.5134  
0.5134  
0.5134  
0.5145  
0.5145  
0.5145  
0.5146  
0.5146  
0.5146

0.5148  
0.5148  
0.5148  
0.5148  
0.5151  
0.5151  
0.5155  
0.5155  
0.5155  
0.5157  
0.5159  
0.5159  
0.5159  
0.5159  
0.5164  
0.5165  
0.5166  
0.5166  
0.5167  
0.5167  
0.5167  
0.5167  
0.5167  
0.5168  
0.5170  
0.5171  
0.5176  
0.5177  
0.5178  
0.5179  
0.5179  
0.5179  
0.5180  
0.5180  
0.5180  
0.5180  
0.5180  
0.5180  
0.5180  
0.5180  
0.5180  
0.5180  
0.5181  
0.5182  
0.5182  
0.5182  
0.5187  
0.5187

[illegible]

0.5218  
0.5218  
0.5218  
0.5218  
0.5218  
0.5218  
0.5218  
0.5219  
0.5219  
0.5221  
0.5221  
0.5221  
0.5221  
0.5224  
0.5225  
0.5227  
0.5227  
0.5229  
0.5230  
0.5234  
0.5236  
0.5236  
0.5236  
0.5236  
0.5236  
0.5236  
0.5236  
0.5236  
0.5236  
0.5236  
0.5236  
0.5236  
0.5236  
0.5236  
0.5236  
0.5237  
0.5237  
0.5237  
0.5240  
0.5240  
0.5240  
0.5240  
0.5240  
0.5240  
0.5240  
0.5241  
0.5243  
0.5244  
0.5245  
0.5248  
0.5249  
0.5249  
0.5249  
0.5249

[illegible]







0.5351  
0.5351  
0.5351  
0.5351  
0.5354  
0.5354  
0.5354  
0.5355  
0.5355  
0.5356  
0.5356  
0.5356  
0.5356  
0.5357  
0.5357  
0.5357  
0.5360  
0.5363  
0.5363  
0.5364  
0.5368  
0.5368  
0.5368  
0.5368  
0.5368  
0.5368  
0.5368  
0.5368  
0.5368  
0.5368  
0.5372  
0.5372  
0.5377  
0.5378  
0.5378  
0.5378  
0.5378  
0.5378  
0.5379  
0.5381  
0.5381  
0.5381  
0.5381  
0.5387  
0.5387  
0.5387  
0.5387  
0.5388

0.5388  
0.5391  
0.5391  
0.5393  
0.5393  
0.5393  
0.5393  
0.5393  
0.5393  
0.5393  
0.5395  
0.5395  
0.5397  
0.5398  
0.5399  
0.5400  
0.5400  
0.5403  
0.5403  
0.5403  
0.5407  
0.5408  
0.5408  
0.5408  
0.5409  
0.5409  
0.5409  
0.5409  
0.5409  
0.5411  
0.5411  
0.5411  
0.5413  
0.5414  
0.5415  
0.5419  
0.5420  
0.5420  
0.5420  
0.5420  
0.5422  
0.5425  
0.5425  
0.5425  
0.5425  
0.5425  
0.5426  
0.5426  
0.5427  
0.5428  
0.5429

0.5429  
0.5431  
0.5431  
0.5432  
0.5432  
0.5436  
0.5436  
0.5436  
0.5436  
0.5436  
0.5436  
0.5437  
0.5438  
0.5439  
0.5450  
0.5450  
0.5450  
0.5451  
0.5453  
0.5453  
0.5453  
0.5453  
0.5453  
0.5453  
0.5455  
0.5455  
0.5455  
0.5455  
0.5455  
0.5455  
0.5455  
0.5455  
0.5455  
0.5460  
0.5462  
0.5463  
0.5464  
0.5464  
0.5464  
0.5464  
0.5464  
0.5464  
0.5464  
0.5465  
0.5468  
0.5468  
0.5468  
0.5469  
0.5475  
0.5475  
0.5477

[illegible]

0.5509  
0.5509  
0.5509  
0.5511  
0.5513  
0.5513  
0.5513  
0.5513  
0.5513  
0.5513  
0.5513  
0.5513  
0.5513  
0.5513  
0.5513  
0.5514  
0.5515  
0.5515  
0.5515  
0.5515  
0.5517  
0.5519  
0.5519  
0.5520  
0.5520  
0.5521  
0.5521  
0.5521  
0.5521  
0.5525  
0.5525  
0.5526  
0.5526  
0.5526  
0.5526  
0.5526  
0.5526  
0.5526  
0.5529  
0.5531  
0.5535  
0.5535  
0.5535  
0.5535  
0.5536  
0.5536  
0.5537  
0.5537

0.5538  
0.5540  
0.5541  
0.5543  
0.5543  
0.5546  
0.5546  
0.5546  
0.5546  
0.5546  
0.5546  
0.5546  
0.5546  
0.5546  
0.5547  
0.5547  
0.5547  
0.5549  
0.5549  
0.5549  
0.5550  
0.5550  
0.5550  
0.5550  
0.5550  
0.5550  
0.5551  
0.5551  
0.5551  
0.5551  
0.5551  
0.5551  
0.5551  
0.5551  
0.5551  
0.5551  
0.5551  
0.5551  
0.5551  
0.5551  
0.5551  
0.5555  
0.5555  
0.5556  
0.5559  
0.5560  
0.5563  
0.5564



0.5564  
0.5564  
0.5564  
0.5564  
0.5564  
0.5564  
0.5564  
0.5564  
0.5564  
0.5564  
0.5564  
0.5566  
0.5566  
0.5566  
0.5566  
0.5566  
0.5566  
0.5567  
0.5567  
0.5568  
0.5570  
0.5570  
0.5571  
0.5572  
0.5572  
0.5577  
0.5580  
0.5581  
0.5582  
0.5583  
0.5585  
0.5585  
0.5585  
0.5585  
0.5586  
0.5586  
0.5590  
0.5593  
0.5594  
0.5594  
0.5594  
0.5594  
0.5595  
0.5595  
0.5595  
0.5595  
0.5595  
0.5595  
0.5595  
0.5595



0.5613  
0.5613  
0.5613  
0.5613  
0.5613  
0.5613  
0.5613  
0.5614  
0.5614  
0.5614  
0.5615  
0.5615  
0.5616  
0.5616  
0.5616  
0.5616  
0.5616  
0.5616  
0.5620  
0.5620  
0.5621  
0.5621  
0.5621  
0.5621  
0.5621  
0.5621  
0.5623  
0.5624  
0.5624  
0.5624  
0.5624  
0.5624  
0.5624  
0.5624  
0.5624  
0.5624  
0.5628  
0.5629  
0.5629  
0.5629  
0.5629  
0.5629  
0.5630  
0.5633  
0.5633  
0.5633  
0.5637  
0.5637  
0.5637  
0.5637  
0.5637

0.5637  
0.5641  
0.5641  
0.5642  
0.5643  
0.5643  
0.5643  
0.5643  
0.5643  
0.5644  
0.5644  
0.5645  
0.5645  
0.5645  
0.5645  
0.5645  
0.5645  
0.5645  
0.5652  
0.5653  
0.5653  
0.5654  
0.5654  
0.5654  
0.5654  
0.5654  
0.5656  
0.5658  
0.5658  
0.5658  
0.5658  
0.5663  
0.5663  
0.5663  
0.5663  
0.5664  
0.5664  
0.5665  
0.5665  
0.5667  
0.5667  
0.5669  
0.5669  
0.5671  
0.5671  
0.5672  
0.5672  
0.5673  
0.5673  
0.5673  
0.5673

0.5673  
0.5676  
0.5676  
0.5677  
0.5677  
0.5679  
0.5679  
0.5679  
0.5679  
0.5679  
0.5680  
0.5680  
0.5685  
0.5686  
0.5687  
0.5687  
0.5688  
0.5688  
0.5689  
0.5689  
0.5689  
0.5689  
0.5689  
0.5689  
0.5697  
0.5698  
0.5701  
0.5703  
0.5703  
0.5706  
0.5707  
0.5707  
0.5712  
0.5712  
0.5712  
0.5717  
0.5718  
0.5718  
0.5718  
0.5718  
0.5718  
0.5718  
0.5721  
0.5721  
0.5721  
0.5722  
0.5723  
0.5729



0.5757  
0.5758  
0.5763  
0.5763  
0.5763  
0.5763  
0.5763  
0.5765  
0.5768  
0.5768  
0.5768  
0.5769  
0.5769  
0.5769  
0.5769  
0.5769  
0.5769  
0.5769  
0.5769  
0.5769  
0.5770  
0.5770  
0.5770  
0.5770  
0.5770  
0.5772  
0.5772  
0.5774  
0.5774  
0.5774  
0.5775  
0.5775  
0.5778  
0.5778  
0.5779  
0.5779  
0.5779  
0.5779  
0.5780  
0.5780  
0.5780  
0.5780  
0.5780  
0.5780  
0.5780  
0.5780  
0.5780

[illegible]





0.5872  
0.5872  
0.5874  
0.5875  
0.5876  
0.5876  
0.5876  
0.5876  
0.5877  
0.5877  
0.5877  
0.5879  
0.5879  
0.5879  
0.5879  
0.5879  
0.5881  
0.5883  
0.5883  
0.5883  
0.5884  
0.5885  
0.5885  
0.5886  
0.5886  
0.5886  
0.5886  
0.5887  
0.5887  
0.5890  
0.5891  
0.5891  
0.5891  
0.5892  
0.5892  
0.5895  
0.5895  
0.5895  
0.5895  
0.5895  
0.5895  
0.5895  
0.5896  
0.5896  
0.5902  
0.5902  
0.5902  
0.5902  
0.5903



0.5935  
0.5936  
0.5937  
0.5937  
0.5937  
0.5937  
0.5938  
0.5941  
0.5942  
0.5947  
0.5947  
0.5951  
0.5951  
0.5951  
0.5956  
0.5956  
0.5956  
0.5956  
0.5957  
0.5958  
0.5958  
0.5958  
0.5960  
0.5961  
0.5961  
0.5963  
0.5963  
0.5964  
0.5967  
0.5967  
0.5967  
0.5971  
0.5976  
0.5976  
0.5976  
0.5978  
0.5981  
0.5981  
0.5981  
0.5981  
0.5983  
0.5983  
0.5986  
0.5988  
0.5990  
0.5991  
0.5992  
0.5992  
0.5993

0.5993  
0.5993  
0.5993  
0.5993  
0.5993  
0.5993  
0.5993  
0.5994  
0.5996  
0.5997  
0.5999  
0.5999  
0.6003  
0.6006  
0.6006  
0.6014  
0.6014  
0.6014  
0.6014  
0.6017  
0.6017  
0.6018  
0.6018  
0.6018  
0.6018  
0.6018  
0.6019  
0.6019  
0.6019  
0.6019  
0.6019  
0.6020  
0.6021  
0.6024  
0.6025  
0.6027  
0.6028  
0.6028  
0.6028  
0.6030  
0.6031  
0.6032  
0.6032  
0.6034  
0.6034  
0.6034  
0.6035  
0.6038  
0.6039  
0.6039  
0.6039

0.6039  
0.6039  
0.6040  
0.6041  
0.6045  
0.6047  
0.6047  
0.6047  
0.6047  
0.6050  
0.6050  
0.6050  
0.6050  
0.6050  
0.6052  
0.6052  
0.6053  
0.6053  
0.6053  
0.6053  
0.6053  
0.6053  
0.6053  
0.6053  
0.6053  
0.6053  
0.6054  
0.6054  
0.6055  
0.6055  
0.6055  
0.6055  
0.6056  
0.6056  
0.6056  
0.6056  
0.6057  
0.6058  
0.6058  
0.6059  
0.6059  
0.6059  
0.6059  
0.6059  
0.6061  
0.6070  
0.6070  
0.6074  
0.6076  
0.6078  
0.6078







0.6145  
0.6146  
0.6149  
0.6150  
0.6150  
0.6150  
0.6150  
0.6152  
0.6154  
0.6155  
0.6155  
0.6155  
0.6155  
0.6155  
0.6155  
0.6156  
0.6156  
0.6157  
0.6157  
0.6157  
0.6157  
0.6157  
0.6157  
0.6157  
0.6157  
0.6157  
0.6157  
0.6157  
0.6157  
0.6157  
0.6157  
0.6158  
0.6158  
0.6163  
0.6163  
0.6163  
0.6163  
0.6163  
0.6166  
0.6169  
0.6169  
0.6170  
0.6170  
0.6170  
0.6170  
0.6170  
0.6170  
0.6170  
0.6170  
0.6170  
0.6170  
0.6171  
0.6173  
0.6173  
0.6173  
0.6173

[illegible]

0.6206  
0.6206  
0.6206  
0.6206  
0.6206  
0.6206  
0.6206  
0.6206  
0.6206  
0.6206  
0.6206  
0.6206  
0.6212  
0.6212  
0.6212  
0.6212  
0.6212  
0.6212  
0.6212  
0.6212  
0.6212  
0.6212  
0.6213  
0.6213  
0.6214  
0.6217  
0.6217  
0.6217  
0.6217  
0.6217  
0.6217  
0.6217  
0.6217  
0.6217  
0.6217  
0.6228  
0.6229  
0.6229  
0.6231  
0.6231  
0.6231  
0.6231  
0.6231  
0.6231  
0.6231  
0.6231  
0.6231



0.6269  
0.6269  
0.6269  
0.6269  
0.6269  
0.6269  
0.6269  
0.6269  
0.6269  
0.6269  
0.6272  
0.6272  
0.6274  
0.6274  
0.6274  
0.6275  
0.6275  
0.6275  
0.6275  
0.6275  
0.6275  
0.6280  
0.6280  
0.6281  
0.6283  
0.6283  
0.6283  
0.6283  
0.6283  
0.6284  
0.6286  
0.6287  
0.6289  
0.6291  
0.6293  
0.6293  
0.6295  
0.6295  
0.6295  
0.6295  
0.6295  
0.6295  
0.6295  
0.6295  
0.6295  
0.6296  
0.6303  
0.6306  
0.6306  
0.6309

0.6309  
0.6311  
0.6313  
0.6313  
0.6315  
0.6317  
0.6317  
0.6317  
0.6317  
0.6317  
0.6319  
0.6319  
0.6322  
0.6324  
0.6324  
0.6324  
0.6324  
0.6324  
0.6324  
0.6324  
0.6324  
0.6324  
0.6324  
0.6324  
0.6324  
0.6324  
0.6324  
0.6325  
0.6326  
0.6326  
0.6327  
0.6328  
0.6329  
0.6332  
0.6332  
0.6332  
0.6336  
0.6336  
0.6337  
0.6338  
0.6339  
0.6340  
0.6342  
0.6342  
0.6343  
0.6343  
0.6343  
0.6343  
0.6343  
0.6343  
0.6355  
0.6355  
0.6355

|        |  |
|--------|--|
| 0.6355 |  |
| 0.6359 |  |
| 0.6359 |  |
| 0.6359 |  |
| 0.6359 |  |
| 0.6359 |  |
| 0.6359 |  |
| 0.6359 |  |
| 0.6359 |  |
| 0.6359 |  |
| 0.6359 |  |
| 0.6359 |  |
| 0.6359 |  |
| 0.6359 |  |
| 0.6361 |  |
| 0.6362 |  |
| 0.6363 |  |
| 0.6363 |  |
| 0.6364 |  |
| 0.6364 |  |
| 0.6364 |  |
| 0.6364 |  |
| 0.6366 |  |
| 0.6366 |  |
| 0.6366 |  |
| 0.6366 |  |
| 0.6366 |  |
| 0.6366 |  |
| 0.6367 |  |
| 0.6368 |  |
| 0.6369 |  |
| 0.6369 |  |
| 0.6374 |  |
| 0.6375 |  |
| 0.6375 |  |
| 0.6377 |  |
| 0.6377 |  |
| 0.6377 |  |
| 0.6377 |  |
| 0.6378 |  |
| 0.6378 |  |
| 0.6379 |  |
| 0.6379 |  |
| 0.6379 |  |
| 0.6380 |  |
| 0.6380 |  |
| 0.6380 |  |
| 0.6380 |  |

0.6380  
0.6380  
0.6380  
0.6380  
0.6380  
0.6380  
0.6380  
0.6380  
0.6380  
0.6380  
0.6380  
0.6385  
0.6386  
0.6386  
0.6386  
0.6387  
0.6387  
0.6387  
0.6387  
0.6387  
0.6387  
0.6387  
0.6387  
0.6389  
0.6389  
0.6389  
0.6389  
0.6389  
0.6389  
0.6389  
0.6389  
0.6389  
0.6389  
0.6389  
0.6390  
0.6391  
0.6391  
0.6391  
0.6391  
0.6391  
0.6391  
0.6391  
0.6392  
0.6392  
0.6392  
0.6392  
0.6393  
0.6394  
0.6396  
0.6398  
0.6398



[illegible]

0.6427  
0.6427  
0.6427  
0.6430  
0.6430  
0.6430  
0.6432  
0.6432  
0.6432  
0.6432  
0.6434  
0.6434  
0.6435  
0.6435  
0.6435  
0.6436  
0.6436  
0.6437  
0.6437  
0.6437  
0.6439  
0.6439  
0.6439  
0.6442  
0.6443  
0.6443  
0.6443  
0.6445  
0.6445  
0.6445  
0.6445  
0.6446  
0.6448  
0.6448  
0.6448  
0.6449  
0.6449  
0.6452  
0.6452  
0.6452  
0.6452  
0.6457  
0.6457  
0.6459  
0.6460  
0.6468  
0.6468  
0.6468  
0.6468  
0.6468  
0.6468  
0.6468

0.6468  
0.6469  
0.6470  
0.6470  
0.6470  
0.6470  
0.6470  
0.6470  
0.6470  
0.6470  
0.6470  
0.6470  
0.6472  
0.6472  
0.6472  
0.6472  
0.6475  
0.6477  
0.6477  
0.6477  
0.6478  
0.6478  
0.6478  
0.6478  
0.6480  
0.6482  
0.6486  
0.6491  
0.6493  
0.6494  
0.6494  
0.6494  
0.6495  
0.6495  
0.6496  
0.6497  
0.6497  
0.6497  
0.6502  
0.6502  
0.6502  
0.6502  
0.6502  
0.6505  
0.6508  
0.6509  
0.6509  
0.6509  
0.6510  
0.6510

0.6510  
0.6510  
0.6510  
0.6510  
0.6510  
0.6510  
0.6510  
0.6510  
0.6510  
0.6510  
0.6510  
0.6510  
0.6510  
0.6510  
0.6510  
0.6514  
0.6517  
0.6519  
0.6520  
0.6520  
0.6520  
0.6524  
0.6524  
0.6524  
0.6524  
0.6524  
0.6524  
0.6524  
0.6524  
0.6524  
0.6525  
0.6526  
0.6528  
0.6528  
0.6529  
0.6530  
0.6530  
0.6531  
0.6534  
0.6534  
0.6534  
0.6534  
0.6535  
0.6535  
0.6535  
0.6535  
0.6537  
0.6539  
0.6539  
0.6539

0.6539  
0.6540  
0.6540  
0.6541  
0.6543  
0.6545  
0.6546  
0.6547  
0.6547  
0.6547  
0.6547  
0.6547  
0.6547  
0.6547  
0.6549  
0.6552  
0.6552  
0.6557  
0.6557  
0.6557  
0.6557  
0.6562  
0.6565  
0.6565  
0.6565  
0.6565  
0.6565  
0.6565  
0.6566  
0.6569  
0.6571  
0.6571  
0.6572  
0.6574  
0.6574  
0.6580  
0.6580  
0.6581  
0.6583  
0.6583  
0.6583  
0.6583  
0.6583  
0.6583  
0.6583  
0.6586  
0.6587  
0.6588  
0.6588  
0.6588  
0.6588

|        |  |
|--------|--|
| 0.6588 |  |
| 0.6588 |  |
| 0.6591 |  |
| 0.6592 |  |
| 0.6594 |  |
| 0.6594 |  |
| 0.6595 |  |
| 0.6595 |  |
| 0.6597 |  |
| 0.6597 |  |
| 0.6597 |  |
| 0.6597 |  |
| 0.6604 |  |
| 0.6604 |  |
| 0.6612 |  |
| 0.6612 |  |
| 0.6612 |  |
| 0.6613 |  |
| 0.6616 |  |
| 0.6616 |  |
| 0.6621 |  |
| 0.6621 |  |
| 0.6621 |  |
| 0.6623 |  |
| 0.6623 |  |
| 0.6624 |  |
| 0.6625 |  |
| 0.6625 |  |
| 0.6628 |  |
| 0.6628 |  |
| 0.6628 |  |
| 0.6631 |  |
| 0.6632 |  |
| 0.6632 |  |
| 0.6633 |  |
| 0.6633 |  |
| 0.6633 |  |
| 0.6633 |  |
| 0.6633 |  |
| 0.6633 |  |
| 0.6633 |  |
| 0.6633 |  |
| 0.6633 |  |
| 0.6633 |  |
| 0.6633 |  |
| 0.6633 |  |
| 0.6634 |  |
| 0.6635 |  |

0.6635  
0.6635  
0.6635  
0.6635  
0.6635  
0.6635  
0.6635  
0.6636  
0.6636  
0.6636  
0.6636  
0.6636  
0.6638  
0.6646  
0.6646  
0.6646  
0.6646  
0.6646  
0.6646  
0.6646  
0.6649  
0.6649  
0.6649  
0.6649  
0.6649  
0.6649  
0.6649  
0.6649  
0.6649  
0.6649  
0.6649  
0.6649  
0.6654  
0.6654  
0.6654  
0.6655  
0.6655  
0.6655  
0.6655  
0.6655  
0.6657  
0.6658  
0.6658  
0.6658  
0.6658  
0.6659  
0.6659  
0.6661

[illegible]



0.6693  
0.6694  
0.6695  
0.6695  
0.6695  
0.6696  
0.6698  
0.6698  
0.6700  
0.6700  
0.6700  
0.6706  
0.6707  
0.6708  
0.6709  
0.6710  
0.6710  
0.6715  
0.6715  
0.6716  
0.6717  
0.6717  
0.6717  
0.6718  
0.6718  
0.6719  
0.6719  
0.6719  
0.6719  
0.6720  
0.6721  
0.6724  
0.6725  
0.6725  
0.6725  
0.6725  
0.6725  
0.6725  
0.6725  
0.6725  
0.6725  
0.6725  
0.6732  
0.6732  
0.6733  
0.6733  
0.6733  
0.6735  
0.6736  
0.6736  
0.6736

0.6737  
0.6737  
0.6740  
0.6740  
0.6740  
0.6740  
0.6741  
0.6741  
0.6742  
0.6742  
0.6743  
0.6745  
0.6746  
0.6746  
0.6746  
0.6746  
0.6746  
0.6746  
0.6746  
0.6746  
0.6746  
0.6746  
0.6747  
0.6747  
0.6748  
0.6748  
0.6748  
0.6748  
0.6748  
0.6749  
0.6749  
0.6749  
0.6750  
0.6750  
0.6752  
0.6752  
0.6757  
0.6757  
0.6758  
0.6759  
0.6760  
0.6760  
0.6761  
0.6762  
0.6762  
0.6763  
0.6763  
0.6764  
0.6767  
0.6768



0.6791  
0.6796  
0.6796  
0.6796  
0.6796  
0.6796  
0.6796  
0.6796  
0.6801  
0.6803  
0.6803  
0.6806  
0.6806  
0.6806  
0.6806  
0.6806  
0.6806  
0.6807  
0.6808  
0.6808  
0.6808  
0.6810  
0.6810  
0.6810  
0.6810  
0.6810  
0.6810  
0.6810  
0.6810  
0.6810  
0.6810  
0.6810  
0.6812  
0.6812  
0.6814  
0.6814  
0.6814  
0.6814  
0.6814  
0.6814  
0.6814  
0.6817  
0.6817  
0.6818  
0.6819  
0.6819  
0.6822  
0.6822  
0.6822  
0.6822  
0.6823

0.6824  
0.6824  
0.6825  
0.6825  
0.6825  
0.6827  
0.6827  
0.6827  
0.6827  
0.6829  
0.6829  
0.6830  
0.6830  
0.6830  
0.6830  
0.6830  
0.6830  
0.6830  
0.6830  
0.6830  
0.6830  
0.6830  
0.6831  
0.6833  
0.6833  
0.6833  
0.6833  
0.6834  
0.6834  
0.6834  
0.6834  
0.6836  
0.6836  
0.6837  
0.6837  
0.6840  
0.6840  
0.6843  
0.6847  
0.6848  
0.6848  
0.6848  
0.6848  
0.6848  
0.6848  
0.6848  
0.6850  
0.6852  
0.6856  
0.6856  
0.6856  
0.6856

0.6857  
0.6857  
0.6858  
0.6858  
0.6858  
0.6858  
0.6858  
0.6858  
0.6858  
0.6858  
0.6860  
0.6860  
0.6861  
0.6863  
0.6863  
0.6863  
0.6865  
0.6866  
0.6866  
0.6867  
0.6867  
0.6868  
0.6876  
0.6876  
0.6876  
0.6876  
0.6876  
0.6877  
0.6877  
0.6877  
0.6879  
0.6879  
0.6879  
0.6879  
0.6879  
0.6883  
0.6886  
0.6886  
0.6886  
0.6888  
0.6888  
0.6888  
0.6889  
0.6890  
0.6890  
0.6893  
0.6894  
0.6894  
0.6894  
0.6894  
0.6894

0.6894  
0.6895  
0.6895  
0.6897  
0.6897  
0.6897  
0.6897  
0.6897  
0.6900  
0.6901  
0.6902  
0.6902  
0.6904  
0.6904  
0.6904  
0.6904  
0.6904  
0.6904  
0.6910  
0.6911  
0.6913  
0.6913  
0.6913  
0.6913  
0.6914  
0.6915  
0.6916  
0.6916  
0.6916  
0.6918  
0.6918  
0.6918  
0.6918  
0.6919  
0.6919  
0.6922  
0.6923  
0.6923  
0.6925  
0.6926  
0.6928  
0.6928  
0.6928  
0.6931  
0.6931  
0.6931  
0.6932  
0.6936  
0.6936  
0.6936

0.6939  
0.6939  
0.6939  
0.6939  
0.6939  
0.6940  
0.6940  
0.6940  
0.6940  
0.6941  
0.6941  
0.6941  
0.6941  
0.6943  
0.6943  
0.6944  
0.6944  
0.6944  
0.6945  
0.6945  
0.6946  
0.6946  
0.6946  
0.6946  
0.6946  
0.6946  
0.6951  
0.6952  
0.6953  
0.6953  
0.6953  
0.6953  
0.6954  
0.6954  
0.6955  
0.6955  
0.6955  
0.6955  
0.6955  
0.6955  
0.6955  
0.6955  
0.6955  
0.6956  
0.6956  
0.6956  
0.6956  
0.6956  
0.6956  
0.6956



0.6956  
0.6958  
0.6959  
0.6959  
0.6959  
0.6959  
0.6959  
0.6965  
0.6966  
0.6966  
0.6967  
0.6967  
0.6968  
0.6969  
0.6970  
0.6970  
0.6973  
0.6973  
0.6975  
0.6976  
0.6976  
0.6976  
0.6976  
0.6976  
0.6976  
0.6976  
0.6976  
0.6976  
0.6976  
0.6976  
0.6977  
0.6977  
0.6977  
0.6977  
0.6977  
0.6977  
0.6977  
0.6977  
0.6977  
0.6980  
0.6983  
0.6983  
0.6986  
0.6986  
0.6986  
0.6991  
0.6995  
0.7000  
0.7000  
0.7001  
0.7001  
0.7002

0.7003  
0.7005  
0.7008  
0.7008  
0.7009  
0.7009  
0.7010  
0.7010  
0.7010  
0.7010  
0.7010  
0.7010  
0.7010  
0.7010  
0.7010  
0.7011  
0.7011  
0.7011  
0.7012  
0.7012  
0.7015  
0.7015  
0.7016  
0.7016  
0.7016  
0.7016  
0.7016  
0.7016  
0.7016  
0.7016  
0.7016  
0.7018  
0.7019  
0.7021  
0.7021  
0.7021  
0.7021  
0.7021  
0.7021  
0.7022  
0.7027  
0.7028  
0.7028  
0.7028  
0.7028  
0.7028  
0.7028  
0.7028  
0.7028  
0.7028

[illegible]



0.7090  
0.7095  
0.7095  
0.7095  
0.7095  
0.7096  
0.7096  
0.7096  
0.7098  
0.7098  
0.7098  
0.7100  
0.7100  
0.7100  
0.7100  
0.7100  
0.7100  
0.7103  
0.7103  
0.7107  
0.7107  
0.7108  
0.7108  
0.7108  
0.7108  
0.7111  
0.7114  
0.7114  
0.7115  
0.7115  
0.7115  
0.7117  
0.7118  
0.7118  
0.7118  
0.7118  
0.7118  
0.7118  
0.7118  
0.7118  
0.7118  
0.7120  
0.7120  
0.7120  
0.7120  
0.7120  
0.7120  
0.7123  
0.7125  
0.7126  
0.7128  
0.7132

0.7133  
0.7133  
0.7133  
0.7134  
0.7134  
0.7134  
0.7134  
0.7136  
0.7138  
0.7138  
0.7139  
0.7139  
0.7139  
0.7139  
0.7139  
0.7139  
0.7139  
0.7139  
0.7139  
0.7139  
0.7139  
0.7139  
0.7139  
0.7140  
0.7140  
0.7140  
0.7140  
0.7140  
0.7142  
0.7142  
0.7142  
0.7144  
0.7145  
0.7146  
0.7146  
0.7150  
0.7150  
0.7151  
0.7151  
0.7151  
0.7155  
0.7155  
0.7156  
0.7160  
0.7160  
0.7161  
0.7162  
0.7163

|        |  |
|--------|--|
| 0.7165 |  |
| 0.7168 |  |
| 0.7168 |  |
| 0.7168 |  |
| 0.7168 |  |
| 0.7168 |  |
| 0.7168 |  |
| 0.7168 |  |
| 0.7170 |  |
| 0.7170 |  |
| 0.7170 |  |
| 0.7170 |  |
| 0.7170 |  |
| 0.7170 |  |
| 0.7170 |  |
| 0.7172 |  |
| 0.7173 |  |
| 0.7175 |  |
| 0.7175 |  |
| 0.7176 |  |
| 0.7176 |  |
| 0.7176 |  |
| 0.7176 |  |
| 0.7176 |  |
| 0.7176 |  |
| 0.7178 |  |
| 0.7178 |  |
| 0.7179 |  |
| 0.7179 |  |
| 0.7179 |  |
| 0.7179 |  |
| 0.7179 |  |
| 0.7179 |  |
| 0.7179 |  |
| 0.7180 |  |
| 0.7180 |  |
| 0.7180 |  |
| 0.7180 |  |
| 0.7180 |  |
| 0.7180 |  |
| 0.7180 |  |
| 0.7180 |  |
| 0.7180 |  |
| 0.7180 |  |
| 0.7180 |  |
| 0.7180 |  |
| 0.7180 |  |
| 0.7180 |  |
| 0.7180 |  |
| 0.7180 |  |
| 0.7184 |  |
| 0.7184 |  |

0.7187  
0.7188  
0.7189  
0.7189  
0.7189  
0.7194  
0.7194  
0.7194  
0.7194  
0.7194  
0.7195  
0.7196  
0.7196  
0.7197  
0.7197  
0.7197  
0.7197  
0.7197  
0.7197  
0.7197  
0.7198  
0.7198  
0.7200  
0.7203  
0.7203  
0.7203  
0.7203  
0.7203  
0.7203  
0.7206  
0.7206  
0.7206  
0.7206  
0.7206  
0.7208  
0.7209  
0.7212  
0.7214  
0.7214  
0.7214  
0.7216  
0.7216  
0.7216  
0.7216  
0.7217  
0.7221  
0.7221  
0.7221  
0.7221  
0.7221



0.7222  
0.7222  
0.7222  
0.7223  
0.7226  
0.7226  
0.7230  
0.7230  
0.7230  
0.7230  
0.7230  
0.7231  
0.7231  
0.7231  
0.7231  
0.7231  
0.7231  
0.7233  
0.7235  
0.7237  
0.7237  
0.7238  
0.7241  
0.7241  
0.7241  
0.7243  
0.7243  
0.7243  
0.7243  
0.7243  
0.7243  
0.7245  
0.7245  
0.7245  
0.7245  
0.7245  
0.7245  
0.7245  
0.7245  
0.7245  
0.7245  
0.7246  
0.7247  
0.7247  
0.7247  
0.7247  
0.7249  
0.7249  
0.7249  
0.7249  
0.7249  
0.7249  
0.7250

0.7250  
0.7252  
0.7252  
0.7252  
0.7252  
0.7254  
0.7255  
0.7255  
0.7256  
0.7256  
0.7256  
0.7258  
0.7259  
0.7259  
0.7259  
0.7260  
0.7260  
0.7261  
0.7261  
0.7261  
0.7261  
0.7261  
0.7261  
0.7261  
0.7262  
0.7264  
0.7264  
0.7266  
0.7266  
0.7269  
0.7269  
0.7269  
0.7269  
0.7269  
0.7269  
0.7272  
0.7274  
0.7274  
0.7274  
0.7274  
0.7274  
0.7274  
0.7275  
0.7275  
0.7277  
0.7282  
0.7285  
0.7286  
0.7287  
0.7287  
0.7289

0.7291  
0.7291  
0.7291  
0.7292  
0.7292  
0.7293  
0.7294  
0.7294  
0.7296  
0.7296  
0.7296  
0.7296  
0.7296  
0.7296  
0.7296  
0.7297  
0.7298  
0.7299  
0.7302  
0.7302  
0.7302  
0.7303  
0.7304  
0.7305  
0.7308  
0.7311  
0.7311  
0.7311  
0.7311  
0.7312  
0.7317  
0.7317  
0.7320  
0.7321  
0.7322  
0.7323  
0.7323  
0.7323  
0.7323  
0.7323  
0.7323  
0.7323  
0.7323  
0.7323  
0.7324  
0.7325  
0.7325  
0.7325  
0.7325  
0.7325  
0.7325

0.7325  
0.7326  
0.7326  
0.7327  
0.7328  
0.7331  
0.7331  
0.7334  
0.7334  
0.7334  
0.7334  
0.7334  
0.7336  
0.7337  
0.7338  
0.7338  
0.7338  
0.7338  
0.7342  
0.7342  
0.7343  
0.7343  
0.7344  
0.7346  
0.7349  
0.7352  
0.7355  
0.7358  
0.7358  
0.7359  
0.7359  
0.7360  
0.7361  
0.7361  
0.7362  
0.7362  
0.7362  
0.7362  
0.7362  
0.7362  
0.7362  
0.7362  
0.7363  
0.7363  
0.7363  
0.7363  
0.7369  
0.7371  
0.7371  
0.7372  
0.7373

0.7373  
0.7373  
0.7373  
0.7378  
0.7382  
0.7385  
0.7386  
0.7386  
0.7386  
0.7386  
0.7386  
0.7386  
0.7390  
0.7391  
0.7391  
0.7392  
0.7392  
0.7392  
0.7392  
0.7394  
0.7394  
0.7398  
0.7398  
0.7398  
0.7398  
0.7398  
0.7400  
0.7400  
0.7400  
0.7400  
0.7406  
0.7408  
0.7408  
0.7409  
0.7409  
0.7409  
0.7412  
0.7412  
0.7413  
0.7413  
0.7413  
0.7413  
0.7413  
0.7413  
0.7413  
0.7414  
0.7414  
0.7414  
0.7417  
0.7417

0.7418  
0.7422  
0.7423  
0.7423  
0.7425  
0.7427  
0.7427  
0.7427  
0.7429  
0.7429  
0.7431  
0.7431  
0.7432  
0.7433  
0.7433  
0.7435  
0.7435  
0.7436  
0.7439  
0.7439  
0.7440  
0.7441  
0.7443  
0.7444  
0.7444  
0.7446  
0.7451  
0.7455  
0.7455  
0.7456  
0.7456  
0.7458  
0.7459  
0.7462  
0.7462  
0.7462  
0.7464  
0.7466  
0.7466  
0.7466  
0.7466  
0.7466  
0.7466  
0.7466  
0.7466  
0.7466  
0.7467  
0.7467  
0.7474  
0.7474  
0.7474

0.7474  
0.7474  
0.7474  
0.7474  
0.7474  
0.7474  
0.7474  
0.7474  
0.7474  
0.7474  
0.7474  
0.7474  
0.7477  
0.7477  
0.7477  
0.7477  
0.7477  
0.7478  
0.7479  
0.7479  
0.7479  
0.7480  
0.7480  
0.7486  
0.7486  
0.7490  
0.7490  
0.7490  
0.7490  
0.7490  
0.7490  
0.7490  
0.7490  
0.7490  
0.7490  
0.7490  
0.7490  
0.7490  
0.7490  
0.7490  
0.7491  
0.7491  
0.7492  
0.7492  
0.7492  
0.7493  
0.7493  
0.7493  
0.7495  
0.7496

0.7496  
0.7496  
0.7496  
0.7496  
0.7496  
0.7496  
0.7500  
0.7500  
0.7501  
0.7501  
0.7501  
0.7501  
0.7501  
0.7501  
0.7506  
0.7506  
0.7506  
0.7507  
0.7509  
0.7509  
0.7509  
0.7509  
0.7510  
0.7511  
0.7512  
0.7514  
0.7518  
0.7518  
0.7519  
0.7519  
0.7519  
0.7522  
0.7524  
0.7525  
0.7525  
0.7528  
0.7530  
0.7533  
0.7533  
0.7533  
0.7535  
0.7536  
0.7538  
0.7540  
0.7541  
0.7541  
0.7541  
0.7541  
0.7542  
0.7542  
0.7542



0.7543  
0.7543  
0.7544  
0.7544  
0.7544  
0.7544  
0.7545  
0.7546  
0.7546  
0.7546  
0.7546  
0.7546  
0.7549  
0.7550  
0.7550  
0.7557  
0.7558  
0.7566  
0.7567  
0.7569  
0.7569  
0.7570  
0.7570  
0.7570  
0.7571  
0.7575  
0.7576  
0.7579  
0.7579  
0.7580  
0.7586  
0.7587  
0.7587  
0.7587  
0.7587  
0.7587  
0.7588  
0.7588  
0.7588  
0.7588  
0.7588  
0.7588  
0.7589  
0.7590  
0.7590  
0.7590  
0.7590  
0.7591  
0.7593  
0.7594

|        |  |
|--------|--|
| 0.7594 |  |
| 0.7595 |  |
| 0.7595 |  |
| 0.7595 |  |
| 0.7595 |  |
| 0.7595 |  |
| 0.7595 |  |
| 0.7599 |  |
| 0.7600 |  |
| 0.7600 |  |
| 0.7600 |  |
| 0.7600 |  |
| 0.7603 |  |
| 0.7603 |  |
| 0.7604 |  |
| 0.7606 |  |
| 0.7606 |  |
| 0.7606 |  |
| 0.7606 |  |
| 0.7606 |  |
| 0.7609 |  |
| 0.7609 |  |
| 0.7609 |  |
| 0.7609 |  |
| 0.7609 |  |
| 0.7609 |  |
| 0.7609 |  |
| 0.7609 |  |
| 0.7609 |  |
| 0.7609 |  |
| 0.7609 |  |
| 0.7609 |  |
| 0.7609 |  |
| 0.7611 |  |
| 0.7613 |  |
| 0.7614 |  |
| 0.7614 |  |
| 0.7614 |  |
| 0.7614 |  |
| 0.7614 |  |
| 0.7619 |  |
| 0.7619 |  |
| 0.7620 |  |
| 0.7620 |  |
| 0.7621 |  |
| 0.7621 |  |
| 0.7621 |  |
| 0.7622 |  |

0.7623  
0.7623  
0.7623  
0.7623  
0.7623  
0.7623  
0.7623  
0.7623  
0.7624  
0.7624  
0.7624  
0.7626  
0.7626  
0.7627  
0.7632  
0.7632  
0.7633  
0.7633  
0.7636  
0.7638  
0.7638  
0.7641  
0.7641  
0.7641  
0.7641  
0.7642  
0.7642  
0.7643  
0.7643  
0.7643  
0.7644  
0.7644  
0.7644  
0.7644  
0.7644  
0.7645  
0.7645  
0.7645  
0.7645  
0.7645  
0.7646  
0.7646  
0.7649  
0.7649  
0.7649  
0.7649  
0.7649  
0.7652  
0.7652



0.7676  
0.7676  
0.7676  
0.7676  
0.7677  
0.7678  
0.7678  
0.7678  
0.7678  
0.7678  
0.7681  
0.7684  
0.7686  
0.7686  
0.7691  
0.7691  
0.7691  
0.7691  
0.7692  
0.7692  
0.7692  
0.7692  
0.7692  
0.7692  
0.7693  
0.7693  
0.7693  
0.7695  
0.7695  
0.7697  
0.7697  
0.7698  
0.7698  
0.7701  
0.7704  
0.7704  
0.7704  
0.7704  
0.7705  
0.7705  
0.7705  
0.7705  
0.7705  
0.7707  
0.7709  
0.7710  
0.7713  
0.7713  
0.7717  
0.7719  
0.7722

[illegible]

0.7755  
0.7755  
0.7758  
0.7758  
0.7758  
0.7758  
0.7758  
0.7758  
0.7758  
0.7759  
0.7761  
0.7763  
0.7763  
0.7763  
0.7763  
0.7763  
0.7763  
0.7763  
0.7763  
0.7764  
0.7766  
0.7766  
0.7766  
0.7766  
0.7766  
0.7766  
0.7766  
0.7766  
0.7766  
0.7772  
0.7772  
0.7772  
0.7773  
0.7773  
0.7775  
0.7776  
0.7777  
0.7783  
0.7785  
0.7787  
0.7788  
0.7790  
0.7790  
0.7790  
0.7791  
0.7791  
0.7792  
0.7792  
0.7792  
0.7792  
0.7792

0.7792  
0.7792  
0.7792  
0.7792  
0.7796  
0.7798  
0.7798  
0.7798  
0.7798  
0.7798  
0.7804  
0.7805  
0.7806  
0.7810  
0.7810  
0.7810  
0.7810  
0.7810  
0.7810  
0.7810  
0.7810  
0.7810  
0.7810  
0.7812  
0.7815  
0.7816  
0.7819  
0.7821  
0.7821  
0.7821  
0.7821  
0.7821  
0.7821  
0.7821  
0.7822  
0.7823  
0.7825  
0.7825  
0.7826  
0.7826  
0.7826  
0.7826  
0.7826  
0.7826  
0.7826  
0.7827  
0.7828  
0.7829  
0.7829  
0.7829  
0.7832





0.7870  
0.7870  
0.7870  
0.7870  
0.7870  
0.7871  
0.7871  
0.7871  
0.7872  
0.7872  
0.7873  
0.7873  
0.7873  
0.7873  
0.7876  
0.7876  
0.7876  
0.7876  
0.7876  
0.7876  
0.7876  
0.7876  
0.7876  
0.7876  
0.7877  
0.7877  
0.7877  
0.7877  
0.7877  
0.7877  
0.7877  
0.7877  
0.7877  
0.7877  
0.7877  
0.7877  
0.7877  
0.7877  
0.7877  
0.7879  
0.7880  
0.7880  
0.7881  
0.7884  
0.7884  
0.7884  
0.7884  
0.7884  
0.7884  
0.7884  
0.7884  
0.7884

0.7884  
0.7884  
0.7884  
0.7884  
0.7884  
0.7884  
0.7884  
0.7885  
0.7885  
0.7886  
0.7887  
0.7889  
0.7889  
0.7891  
0.7891  
0.7891  
0.7891  
0.7891  
0.7891  
0.7894  
0.7894  
0.7894  
0.7894  
0.7896  
0.7896  
0.7898  
0.7899  
0.7899  
0.7899  
0.7899  
0.7899  
0.7899  
0.7899  
0.7899  
0.7905  
0.7908  
0.7908  
0.7908  
0.7908  
0.7908  
0.7909  
0.7911  
0.7913  
0.7913  
0.7913  
0.7914  
0.7915  
0.7915  
0.7916  
0.7917

0.7919  
0.7919  
0.7919  
0.7919  
0.7919  
0.7919  
0.7919  
0.7919  
0.7919  
0.7919  
0.7920  
0.7923  
0.7924  
0.7924  
0.7925  
0.7926  
0.7926  
0.7926  
0.7926  
0.7926  
0.7928  
0.7928  
0.7928  
0.7931  
0.7932  
0.7932  
0.7932  
0.7933  
0.7933  
0.7933  
0.7933  
0.7935  
0.7938  
0.7938  
0.7938  
0.7940  
0.7941  
0.7942  
0.7942  
0.7942  
0.7943  
0.7945  
0.7945  
0.7945  
0.7947  
0.7949  
0.7949  
0.7949  
0.7949  
0.7949  
0.7949

0.7949  
0.7949  
0.7949  
0.7949  
0.7950  
0.7955  
0.7955  
0.7955  
0.7955  
0.7955  
0.7957  
0.7957  
0.7957  
0.7957  
0.7957  
0.7958  
0.7959  
0.7959  
0.7959  
0.7959  
0.7964  
0.7964  
0.7964  
0.7964  
0.7964  
0.7964  
0.7966  
0.7967  
0.7967  
0.7968  
0.7968  
0.7972  
0.7972  
0.7973  
0.7974  
0.7974  
0.7974  
0.7974  
0.7976  
0.7980  
0.7980  
0.7980  
0.7987  
0.7992  
0.7992  
0.7994  
0.7994  
0.7994  
0.7995  
0.7997

|        |  |
|--------|--|
| 0.7998 |  |
| 0.7998 |  |
| 0.7998 |  |
| 0.7999 |  |
| 0.7999 |  |
| 0.8000 |  |
| 0.8001 |  |
| 0.8001 |  |
| 0.8001 |  |
| 0.8001 |  |
| 0.8001 |  |
| 0.8001 |  |
| 0.8003 |  |
| 0.8003 |  |
| 0.8005 |  |
| 0.8006 |  |
| 0.8006 |  |
| 0.8006 |  |
| 0.8007 |  |
| 0.8007 |  |
| 0.8007 |  |
| 0.8011 |  |
| 0.8012 |  |
| 0.8012 |  |
| 0.8014 |  |
| 0.8014 |  |
| 0.8014 |  |
| 0.8015 |  |
| 0.8015 |  |
| 0.8017 |  |
| 0.8017 |  |
| 0.8017 |  |
| 0.8017 |  |
| 0.8017 |  |
| 0.8017 |  |
| 0.8019 |  |
| 0.8019 |  |
| 0.8019 |  |
| 0.8019 |  |
| 0.8019 |  |
| 0.8019 |  |
| 0.8019 |  |
| 0.8021 |  |
| 0.8021 |  |
| 0.8021 |  |
| 0.8021 |  |
| 0.8022 |  |
| 0.8023 |  |
| 0.8027 |  |
| 0.8028 |  |

0.8029  
0.8029  
0.8029  
0.8029  
0.8029  
0.8029  
0.8030  
0.8030  
0.8030  
0.8030  
0.8030  
0.8030  
0.8030  
0.8030  
0.8030  
0.8030  
0.8030  
0.8030  
0.8030  
0.8030  
0.8030  
0.8030  
0.8030  
0.8030  
0.8031  
0.8032  
0.8032  
0.8032  
0.8033  
0.8033  
0.8033  
0.8033  
0.8033  
0.8033  
0.8034  
0.8034  
0.8035  
0.8035  
0.8035  
0.8035  
0.8035  
0.8035  
0.8037  
0.8037  
0.8037  
0.8038  
0.8040  
0.8045  
0.8045  
0.8045  
0.8045  
0.8045

0.8045  
0.8045  
0.8046  
0.8046  
0.8047  
0.8050  
0.8051  
0.8051  
0.8051  
0.8052  
0.8052  
0.8054  
0.8054  
0.8057  
0.8057  
0.8057  
0.8058  
0.8058  
0.8058  
0.8058  
0.8059  
0.8059  
0.8059  
0.8059  
0.8059  
0.8061  
0.8061  
0.8061  
0.8061  
0.8061  
0.8062  
0.8062  
0.8062  
0.8062  
0.8062  
0.8063  
0.8063  
0.8063  
0.8063  
0.8064  
0.8064  
0.8064  
0.8064  
0.8064  
0.8065  
0.8068  
0.8068  
0.8068  
0.8068  
0.8068  
0.8068



0.8070  
0.8070  
0.8070  
0.8074  
0.8076  
0.8078  
0.8079  
0.8079  
0.8081  
0.8081  
0.8082  
0.8083  
0.8084  
0.8084  
0.8084  
0.8084  
0.8084  
0.8084  
0.8084  
0.8084  
0.8084  
0.8084  
0.8084  
0.8084  
0.8084  
0.8084  
0.8084  
0.8085  
0.8086  
0.8086  
0.8086  
0.8089  
0.8089  
0.8089  
0.8089  
0.8089  
0.8089  
0.8089  
0.8089  
0.8093  
0.8093  
0.8093  
0.8093  
0.8094  
0.8098  
0.8101  
0.8103  
0.8106  
0.8108  
0.8108  
0.8108

0.8109  
0.8112  
0.8112  
0.8112  
0.8114  
0.8114  
0.8114  
0.8114  
0.8114  
0.8114  
0.8114  
0.8114  
0.8114  
0.8114  
0.8114  
0.8115  
0.8115  
0.8119  
0.8121  
0.8124  
0.8124  
0.8124  
0.8124  
0.8125  
0.8125  
0.8125  
0.8125  
0.8126  
0.8127  
0.8127  
0.8129  
0.8129  
0.8129  
0.8129  
0.8131  
0.8131  
0.8132  
0.8133  
0.8133  
0.8133  
0.8133  
0.8133  
0.8133  
0.8134  
0.8136  
0.8136  
0.8136  
0.8136  
0.8137  
0.8139  
0.8142  
0.8143

0.8143  
0.8143  
0.8143  
0.8149  
0.8151  
0.8151  
0.8151  
0.8151  
0.8151  
0.8151  
0.8151  
0.8151  
0.8151  
0.8152  
0.8153  
0.8153  
0.8153  
0.8157  
0.8157  
0.8157  
0.8157  
0.8157  
0.8157  
0.8159  
0.8159  
0.8159  
0.8159  
0.8159  
0.8161  
0.8161  
0.8161  
0.8161  
0.8161  
0.8161  
0.8161  
0.8161  
0.8161  
0.8161  
0.8161  
0.8161  
0.8161  
0.8161  
0.8161  
0.8161  
0.8161  
0.8161  
0.8161  
0.8163  
0.8168  
0.8169  
0.8169  
0.8169

0.8170  
0.8171  
0.8171  
0.8171  
0.8172  
0.8172  
0.8172  
0.8174  
0.8174  
0.8174  
0.8174  
0.8174  
0.8174  
0.8174  
0.8174  
0.8174  
0.8174  
0.8174  
0.8174  
0.8174  
0.8174  
0.8174  
0.8175  
0.8175  
0.8175  
0.8175  
0.8175  
0.8175  
0.8175  
0.8175  
0.8175  
0.8175  
0.8176  
0.8176  
0.8176  
0.8176  
0.8176  
0.8176  
0.8178  
0.8179  
0.8181  
0.8181  
0.8181  
0.8181  
0.8181  
0.8181  
0.8181  
0.8182  
0.8182

0.8182  
0.8182  
0.8182  
0.8182  
0.8183  
0.8183  
0.8183  
0.8183  
0.8183  
0.8185  
0.8185  
0.8185  
0.8186  
0.8186  
0.8186  
0.8186  
0.8186  
0.8187  
0.8188  
0.8188  
0.8188  
0.8188  
0.8189  
0.8189  
0.8192  
0.8193  
0.8193  
0.8193  
0.8194  
0.8194  
0.8194  
0.8195  
0.8195  
0.8195  
0.8195  
0.8195  
0.8195  
0.8195  
0.8195  
0.8195  
0.8195  
0.8196  
0.8196  
0.8196  
0.8197  
0.8198  
0.8198  
0.8199  
0.8199  
0.8199  
0.8199

|        |  |
|--------|--|
| 0.8199 |  |
| 0.8201 |  |
| 0.8202 |  |
| 0.8202 |  |
| 0.8202 |  |
| 0.8202 |  |
| 0.8202 |  |
| 0.8202 |  |
| 0.8203 |  |
| 0.8205 |  |
| 0.8205 |  |
| 0.8205 |  |
| 0.8205 |  |
| 0.8206 |  |
| 0.8206 |  |
| 0.8207 |  |
| 0.8207 |  |
| 0.8207 |  |
| 0.8208 |  |
| 0.8211 |  |
| 0.8211 |  |
| 0.8212 |  |
| 0.8212 |  |
| 0.8212 |  |
| 0.8212 |  |
| 0.8212 |  |
| 0.8212 |  |
| 0.8212 |  |
| 0.8212 |  |
| 0.8212 |  |
| 0.8216 |  |
| 0.8217 |  |
| 0.8218 |  |
| 0.8218 |  |
| 0.8218 |  |
| 0.8218 |  |
| 0.8218 |  |
| 0.8218 |  |
| 0.8220 |  |
| 0.8223 |  |
| 0.8223 |  |
| 0.8223 |  |
| 0.8223 |  |
| 0.8223 |  |
| 0.8223 |  |
| 0.8223 |  |
| 0.8223 |  |
| 0.8225 |  |
| 0.8225 |  |
| 0.8229 |  |
| 0.8229 |  |
| 0.8229 |  |

0.8232  
0.8233  
0.8233  
0.8234  
0.8235  
0.8236  
0.8237  
0.8238  
0.8238  
0.8238  
0.8238  
0.8238  
0.8241  
0.8241  
0.8241  
0.8241  
0.8241  
0.8242  
0.8242  
0.8242  
0.8242  
0.8242  
0.8242  
0.8242  
0.8242  
0.8243  
0.8244  
0.8244  
0.8244  
0.8244  
0.8244  
0.8244  
0.8244  
0.8244  
0.8244  
0.8244  
0.8244  
0.8244  
0.8244  
0.8244  
0.8244  
0.8244  
0.8244  
0.8244  
0.8244  
0.8244  
0.8246  
0.8246  
0.8247  
0.8247  
0.8247  
0.8248  
0.8248  
0.8248  
0.8248  
0.8248  
0.8248  
0.8248

[illegible]



|        |  |
|--------|--|
| 0.8282 |  |
| 0.8282 |  |
| 0.8282 |  |
| 0.8283 |  |
| 0.8283 |  |
| 0.8283 |  |
| 0.8286 |  |
| 0.8286 |  |
| 0.8288 |  |
| 0.8288 |  |
| 0.8288 |  |
| 0.8288 |  |
| 0.8291 |  |
| 0.8293 |  |
| 0.8293 |  |
| 0.8293 |  |
| 0.8295 |  |
| 0.8295 |  |
| 0.8295 |  |
| 0.8296 |  |
| 0.8298 |  |
| 0.8298 |  |
| 0.8298 |  |
| 0.8299 |  |
| 0.8299 |  |
| 0.8299 |  |
| 0.8300 |  |
| 0.8300 |  |
| 0.8300 |  |
| 0.8302 |  |
| 0.8302 |  |
| 0.8302 |  |
| 0.8302 |  |
| 0.8302 |  |
| 0.8302 |  |
| 0.8302 |  |
| 0.8302 |  |
| 0.8304 |  |
| 0.8305 |  |
| 0.8305 |  |
| 0.8305 |  |
| 0.8306 |  |
| 0.8306 |  |
| 0.8308 |  |
| 0.8308 |  |
| 0.8310 |  |
| 0.8310 |  |
| 0.8310 |  |
| 0.8311 |  |
| 0.8311 |  |

0.8312  
0.8312  
0.8312  
0.8312  
0.8312  
0.8312  
0.8312  
0.8312  
0.8312  
0.8312  
0.8313  
0.8313  
0.8313  
0.8313  
0.8313  
0.8314  
0.8316  
0.8316  
0.8316  
0.8316  
0.8316  
0.8316  
0.8316  
0.8316  
0.8316  
0.8316  
0.8317  
0.8317  
0.8317  
0.8317  
0.8320  
0.8320  
0.8320  
0.8320  
0.8320  
0.8320  
0.8320  
0.8320  
0.8321  
0.8321  
0.8325  
0.8325  
0.8325  
0.8326  
0.8326  
0.8328  
0.8328  
0.8331  
0.8332





0.8395  
0.8395  
0.8396  
0.8396  
0.8398  
0.8400  
0.8401  
0.8401  
0.8401  
0.8402  
0.8402  
0.8403  
0.8406  
0.8406  
0.8407  
0.8408  
0.8409  
0.8409  
0.8415  
0.8415  
0.8415  
0.8415  
0.8415  
0.8417  
0.8417  
0.8417  
0.8417  
0.8417  
0.8418  
0.8418  
0.8419  
0.8419  
0.8420  
0.8423  
0.8423  
0.8424  
0.8424  
0.8424  
0.8426  
0.8427  
0.8427  
0.8427  
0.8430  
0.8430  
0.8430  
0.8430  
0.8431  
0.8431  
0.8435  
0.8435

0.8435  
0.8435  
0.8437  
0.8438  
0.8440  
0.8440  
0.8440  
0.8440  
0.8440  
0.8440  
0.8441  
0.8442  
0.8442  
0.8442  
0.8442  
0.8442  
0.8446  
0.8447  
0.8447  
0.8447  
0.8448  
0.8448  
0.8448  
0.8448  
0.8448  
0.8448  
0.8448  
0.8448  
0.8448  
0.8449  
0.8449  
0.8449  
0.8449  
0.8450  
0.8451  
0.8451  
0.8451  
0.8451  
0.8451  
0.8453  
0.8454  
0.8454  
0.8454  
0.8454  
0.8454  
0.8454  
0.8454  
0.8454  
0.8454

0.8454  
0.8454  
0.8454  
0.8455  
0.8455  
0.8455  
0.8455  
0.8457  
0.8458  
0.8458  
0.8460  
0.8462  
0.8464  
0.8465  
0.8466  
0.8469  
0.8469  
0.8469  
0.8470  
0.8470  
0.8470  
0.8470  
0.8470  
0.8470  
0.8470  
0.8472  
0.8472  
0.8473  
0.8473  
0.8476  
0.8476  
0.8477  
0.8477  
0.8477  
0.8477  
0.8479  
0.8479  
0.8479  
0.8479  
0.8479  
0.8480  
0.8480  
0.8480  
0.8481  
0.8481  
0.8481  
0.8481  
0.8484  
0.8485  
0.8485

0.8485  
0.8488  
0.8489  
0.8491  
0.8491  
0.8494  
0.8494  
0.8494  
0.8494  
0.8494  
0.8497  
0.8499  
0.8499  
0.8499  
0.8499  
0.8502  
0.8502  
0.8502  
0.8502  
0.8503  
0.8504  
0.8504  
0.8507  
0.8507  
0.8507  
0.8509  
0.8510  
0.8510  
0.8510  
0.8512  
0.8512  
0.8512  
0.8512  
0.8512  
0.8512  
0.8512  
0.8513  
0.8514  
0.8514  
0.8515  
0.8515  
0.8515  
0.8517  
0.8517  
0.8517  
0.8517  
0.8517  
0.8517  
0.8517  
0.8517



[illegible]

0.8534  
0.8535  
0.8535  
0.8535  
0.8535  
0.8535  
0.8535  
0.8539  
0.8539  
0.8539  
0.8539  
0.8539  
0.8539  
0.8539  
0.8539  
0.8539  
0.8539  
0.8540  
0.8542  
0.8543  
0.8543  
0.8544  
0.8544  
0.8544  
0.8547  
0.8547  
0.8548  
0.8551  
0.8554  
0.8554  
0.8554  
0.8556  
0.8556  
0.8556  
0.8562  
0.8562  
0.8562  
0.8562  
0.8563  
0.8563  
0.8563  
0.8564  
0.8564  
0.8564  
0.8564  
0.8567  
0.8568  
0.8572  
0.8572

|        |  |
|--------|--|
| 0.8572 |  |
| 0.8573 |  |
| 0.8574 |  |
| 0.8580 |  |
| 0.8580 |  |
| 0.8580 |  |
| 0.8580 |  |
| 0.8581 |  |
| 0.8584 |  |
| 0.8584 |  |
| 0.8584 |  |
| 0.8584 |  |
| 0.8584 |  |
| 0.8584 |  |
| 0.8584 |  |
| 0.8589 |  |
| 0.8589 |  |
| 0.8589 |  |
| 0.8589 |  |
| 0.8589 |  |
| 0.8589 |  |
| 0.8591 |  |
| 0.8594 |  |
| 0.8596 |  |
| 0.8598 |  |
| 0.8598 |  |
| 0.8598 |  |
| 0.8598 |  |
| 0.8598 |  |
| 0.8598 |  |
| 0.8598 |  |
| 0.8598 |  |
| 0.8598 |  |
| 0.8598 |  |
| 0.8598 |  |
| 0.8598 |  |
| 0.8598 |  |
| 0.8598 |  |
| 0.8598 |  |
| 0.8598 |  |
| 0.8598 |  |
| 0.8599 |  |
| 0.8599 |  |
| 0.8599 |  |
| 0.8600 |  |
| 0.8600 |  |
| 0.8600 |  |
| 0.8600 |  |
| 0.8600 |  |
| 0.8601 |  |
| 0.8603 |  |
| 0.8603 |  |

0.8605  
0.8605  
0.8606  
0.8606  
0.8607  
0.8609  
0.8610  
0.8613  
0.8615  
0.8615  
0.8615  
0.8615  
0.8617  
0.8617  
0.8617  
0.8619  
0.8622  
0.8622  
0.8625  
0.8625  
0.8625  
0.8625  
0.8626  
0.8627  
0.8627  
0.8627  
0.8627  
0.8627  
0.8627  
0.8627  
0.8627  
0.8627  
0.8627  
0.8628  
0.8630  
0.8631  
0.8632  
0.8633  
0.8633  
0.8636  
0.8636  
0.8639  
0.8639  
0.8639  
0.8641  
0.8641  
0.8641  
0.8641  
0.8641  
0.8641

0.8641  
0.8641  
0.8641  
0.8641  
0.8641  
0.8645  
0.8645  
0.8646  
0.8646  
0.8646  
0.8646  
0.8646  
0.8648  
0.8648  
0.8648  
0.8648  
0.8648  
0.8648  
0.8648  
0.8648  
0.8648  
0.8648  
0.8649  
0.8649  
0.8649  
0.8649  
0.8649  
0.8649  
0.8650  
0.8651  
0.8654  
0.8654  
0.8654  
0.8654  
0.8654  
0.8654  
0.8654  
0.8654  
0.8654  
0.8654  
0.8654  
0.8657  
0.8658  
0.8659  
0.8660  
0.8660  
0.8660  
0.8661  
0.8661  
0.8661  
0.8661

[illegible]

0.8680  
0.8682  
0.8683  
0.8684  
0.8684  
0.8684  
0.8684  
0.8684  
0.8684  
0.8687  
0.8687  
0.8688  
0.8688  
0.8689  
0.8689  
0.8689  
0.8689  
0.8690  
0.8691  
0.8692  
0.8694  
0.8694  
0.8694  
0.8694  
0.8695  
0.8699  
0.8701  
0.8701  
0.8701  
0.8701  
0.8701  
0.8701  
0.8701  
0.8701  
0.8701  
0.8701  
0.8703  
0.8703  
0.8703  
0.8706  
0.8706  
0.8708  
0.8709  
0.8711  
0.8712  
0.8712  
0.8712  
0.8715  
0.8715  
0.8721  
0.8722  
0.8722

0.8722  
0.8722  
0.8724  
0.8724  
0.8725  
0.8725  
0.8725  
0.8725  
0.8725  
0.8725  
0.8725  
0.8726  
0.8726  
0.8726  
0.8726  
0.8731  
0.8731  
0.8732  
0.8732  
0.8733  
0.8733  
0.8734  
0.8734  
0.8734  
0.8734  
0.8734  
0.8734  
0.8734  
0.8735  
0.8736  
0.8736  
0.8736  
0.8736  
0.8736  
0.8736  
0.8736  
0.8736  
0.8736  
0.8736  
0.8736  
0.8736  
0.8736  
0.8736  
0.8736  
0.8736  
0.8736  
0.8736  
0.8737  
0.8737  
0.8739  
0.8739  
0.8740  
0.8740  
0.8740



|        |  |
|--------|--|
| 0.8740 |  |
| 0.8740 |  |
| 0.8740 |  |
| 0.8740 |  |
| 0.8740 |  |
| 0.8740 |  |
| 0.8740 |  |
| 0.8740 |  |
| 0.8740 |  |
| 0.8740 |  |
| 0.8740 |  |
| 0.8740 |  |
| 0.8740 |  |
| 0.8740 |  |
| 0.8740 |  |
| 0.8740 |  |
| 0.8740 |  |
| 0.8741 |  |
| 0.8742 |  |
| 0.8742 |  |
| 0.8742 |  |
| 0.8742 |  |
| 0.8742 |  |
| 0.8742 |  |
| 0.8744 |  |
| 0.8745 |  |
| 0.8745 |  |
| 0.8745 |  |
| 0.8745 |  |
| 0.8745 |  |
| 0.8745 |  |
| 0.8745 |  |
| 0.8748 |  |
| 0.8751 |  |
| 0.8751 |  |
| 0.8752 |  |
| 0.8752 |  |
| 0.8752 |  |
| 0.8752 |  |
| 0.8752 |  |
| 0.8752 |  |
| 0.8752 |  |
| 0.8752 |  |
| 0.8752 |  |
| 0.8752 |  |
| 0.8752 |  |
| 0.8752 |  |
| 0.8752 |  |
| 0.8754 |  |
| 0.8758 |  |
| 0.8758 |  |

0.8758  
0.8758  
0.8758  
0.8758  
0.8759  
0.8759  
0.8760  
0.8766  
0.8766  
0.8766  
0.8769  
0.8769  
0.8770  
0.8770  
0.8770  
0.8771  
0.8772  
0.8774  
0.8774  
0.8775  
0.8779  
0.8779  
0.8779  
0.8779  
0.8779  
0.8779  
0.8779  
0.8779  
0.8779  
0.8779  
0.8779  
0.8779  
0.8779  
0.8779  
0.8780  
0.8780  
0.8780  
0.8780  
0.8780  
0.8785  
0.8785  
0.8785  
0.8785  
0.8785  
0.8785  
0.8786  
0.8786

0.8786  
0.8786  
0.8786  
0.8789  
0.8789  
0.8792  
0.8793  
0.8793  
0.8795  
0.8795  
0.8796  
0.8796  
0.8796  
0.8796  
0.8796  
0.8796  
0.8796  
0.8796  
0.8798  
0.8798  
0.8798  
0.8798  
0.8798  
0.8798  
0.8798  
0.8798  
0.8798  
0.8798  
0.8798  
0.8798  
0.8798  
0.8798  
0.8798  
0.8799  
0.8799  
0.8799  
0.8799  
0.8799  
0.8800  
0.8800  
0.8802  
0.8803  
0.8803  
0.8803  
0.8804  
0.8804  
0.8805  
0.8806  
0.8807  
0.8808  
0.8808  
0.8808  
0.8808

0.8809  
0.8809  
0.8809  
0.8809  
0.8810  
0.8814  
0.8817  
0.8817  
0.8818  
0.8818  
0.8820  
0.8820  
0.8820  
0.8820  
0.8820  
0.8820  
0.8823  
0.8823  
0.8823  
0.8824  
0.8824  
0.8825  
0.8828  
0.8828  
0.8832  
0.8832  
0.8832  
0.8832  
0.8832  
0.8834  
0.8835  
0.8835  
0.8837  
0.8837  
0.8837  
0.8837  
0.8837  
0.8837  
0.8837  
0.8837  
0.8837  
0.8840  
0.8840  
0.8840  
0.8840  
0.8840  
0.8842  
0.8842  
0.8842

0.8842  
0.8842  
0.8842  
0.8846  
0.8846  
0.8847  
0.8848  
0.8848  
0.8850  
0.8852  
0.8856  
0.8856  
0.8856  
0.8857  
0.8858  
0.8858  
0.8858  
0.8858  
0.8858  
0.8859  
0.8860  
0.8860  
0.8860  
0.8863  
0.8863  
0.8863  
0.8863  
0.8863  
0.8863  
0.8863  
0.8863  
0.8864  
0.8865  
0.8867  
0.8867  
0.8867  
0.8867  
0.8867  
0.8869  
0.8869  
0.8869  
0.8869  
0.8869  
0.8869  
0.8870  
0.8875  
0.8876  
0.8876  
0.8878

|        |  |
|--------|--|
| 0.8878 |  |
| 0.8878 |  |
| 0.8878 |  |
| 0.8878 |  |
| 0.8878 |  |
| 0.8878 |  |
| 0.8878 |  |
| 0.8878 |  |
| 0.8878 |  |
| 0.8878 |  |
| 0.8878 |  |
| 0.8878 |  |
| 0.8878 |  |
| 0.8879 |  |
| 0.8880 |  |
| 0.8883 |  |
| 0.8883 |  |
| 0.8883 |  |
| 0.8883 |  |
| 0.8886 |  |
| 0.8887 |  |
| 0.8887 |  |
| 0.8888 |  |
| 0.8888 |  |
| 0.8888 |  |
| 0.8888 |  |
| 0.8888 |  |
| 0.8888 |  |
| 0.8888 |  |
| 0.8888 |  |
| 0.8888 |  |
| 0.8888 |  |
| 0.8889 |  |
| 0.8889 |  |
| 0.8891 |  |
| 0.8891 |  |
| 0.8891 |  |
| 0.8891 |  |
| 0.8891 |  |
| 0.8891 |  |
| 0.8891 |  |
| 0.8891 |  |
| 0.8891 |  |
| 0.8891 |  |
| 0.8893 |  |
| 0.8893 |  |
| 0.8894 |  |
| 0.8894 |  |
| 0.8894 |  |
| 0.8894 |  |

0.8894  
0.8894  
0.8897  
0.8897  
0.8901  
0.8901  
0.8901  
0.8901  
0.8901  
0.8901  
0.8901  
0.8901  
0.8901  
0.8901  
0.8902  
0.8903  
0.8904  
0.8905  
0.8906  
0.8908  
0.8908  
0.8908  
0.8908  
0.8908  
0.8909  
0.8909  
0.8910  
0.8910  
0.8915  
0.8915  
0.8915  
0.8917  
0.8917  
0.8918  
0.8918  
0.8918  
0.8920  
0.8920  
0.8921  
0.8922  
0.8924  
0.8924  
0.8925  
0.8928  
0.8929  
0.8932  
0.8932  
0.8932  
0.8932  
0.8932





|        |  |
|--------|--|
| 0.8964 |  |
| 0.8964 |  |
| 0.8964 |  |
| 0.8964 |  |
| 0.8964 |  |
| 0.8964 |  |
| 0.8964 |  |
| 0.8964 |  |
| 0.8964 |  |
| 0.8964 |  |
| 0.8965 |  |
| 0.8965 |  |
| 0.8966 |  |
| 0.8966 |  |
| 0.8966 |  |
| 0.8966 |  |
| 0.8966 |  |
| 0.8966 |  |
| 0.8966 |  |
| 0.8967 |  |
| 0.8967 |  |
| 0.8969 |  |
| 0.8970 |  |
| 0.8970 |  |
| 0.8972 |  |
| 0.8974 |  |
| 0.8974 |  |
| 0.8974 |  |
| 0.8974 |  |
| 0.8974 |  |
| 0.8976 |  |
| 0.8976 |  |
| 0.8976 |  |
| 0.8982 |  |
| 0.8982 |  |
| 0.8982 |  |
| 0.8984 |  |
| 0.8984 |  |
| 0.8984 |  |
| 0.8984 |  |
| 0.8985 |  |
| 0.8985 |  |
| 0.8985 |  |
| 0.8985 |  |
| 0.8985 |  |
| 0.8990 |  |
| 0.8991 |  |
| 0.8992 |  |
| 0.8992 |  |
| 0.8993 |  |

|        |  |
|--------|--|
| 0.8993 |  |
| 0.8993 |  |
| 0.8993 |  |
| 0.8993 |  |
| 0.8993 |  |
| 0.8994 |  |
| 0.8994 |  |
| 0.8995 |  |
| 0.8995 |  |
| 0.8995 |  |
| 0.8995 |  |
| 0.8996 |  |
| 0.8996 |  |
| 0.8996 |  |
| 0.8996 |  |
| 0.8996 |  |
| 0.8996 |  |
| 0.8996 |  |
| 0.8997 |  |
| 0.8997 |  |
| 0.8997 |  |
| 0.8997 |  |
| 0.8997 |  |
| 0.8997 |  |
| 0.8998 |  |
| 0.9002 |  |
| 0.9002 |  |
| 0.9002 |  |
| 0.9002 |  |
| 0.9002 |  |
| 0.9005 |  |
| 0.9005 |  |
| 0.9005 |  |
| 0.9005 |  |
| 0.9005 |  |
| 0.9005 |  |
| 0.9005 |  |
| 0.9005 |  |
| 0.9005 |  |
| 0.9005 |  |
| 0.9005 |  |
| 0.9007 |  |
| 0.9007 |  |
| 0.9007 |  |
| 0.9007 |  |
| 0.9007 |  |
| 0.9007 |  |
| 0.9008 |  |
| 0.9008 |  |
| 0.9012 |  |
| 0.9012 |  |

0.9012  
0.9013  
0.9013  
0.9013  
0.9013  
0.9015  
0.9015  
0.9018  
0.9018  
0.9018  
0.9018  
0.9018  
0.9019  
0.9019  
0.9019  
0.9019  
0.9019  
0.9019  
0.9019  
0.9019  
0.9019  
0.9020  
0.9020  
0.9020  
0.9020  
0.9020  
0.9020  
0.9020  
0.9020  
0.9020  
0.9020  
0.9020  
0.9020  
0.9020  
0.9020  
0.9022  
0.9022  
0.9023  
0.9023  
0.9026  
0.9028  
0.9029  
0.9029  
0.9029  
0.9031  
0.9031  
0.9031  
0.9032  
0.9032  
0.9032  
0.9033  
0.9036  
0.9039

[illegible]

0.9065  
0.9065  
0.9065  
0.9070  
0.9070  
0.9070  
0.9070  
0.9072  
0.9072  
0.9075  
0.9075  
0.9075  
0.9075  
0.9075  
0.9075  
0.9075  
0.9075  
0.9075  
0.9075  
0.9075  
0.9077  
0.9077  
0.9077  
0.9078  
0.9078  
0.9078  
0.9078  
0.9079  
0.9081  
0.9082  
0.9082  
0.9084  
0.9084  
0.9088  
0.9088  
0.9090  
0.9090  
0.9091  
0.9091  
0.9092  
0.9092  
0.9092  
0.9092  
0.9092  
0.9092  
0.9092  
0.9092

0.9092  
0.9092  
0.9094  
0.9097  
0.9097  
0.9097  
0.9097  
0.9097  
0.9097  
0.9097  
0.9097  
0.9101  
0.9101  
0.9102  
0.9102  
0.9104  
0.9106  
0.9107  
0.9107  
0.9107  
0.9108  
0.9108  
0.9108  
0.9108  
0.9108  
0.9108  
0.9108  
0.9110  
0.9110  
0.9110  
0.9110  
0.9110  
0.9117  
0.9119  
0.9121  
0.9121  
0.9121  
0.9121  
0.9121  
0.9121  
0.9121  
0.9123  
0.9125  
0.9125  
0.9126  
0.9126  
0.9126  
0.9128  
0.9128  
0.9128  
0.9129







0.9190  
0.9190  
0.9190  
0.9190  
0.9190  
0.9190  
0.9192  
0.9192  
0.9192  
0.9195  
0.9195  
0.9195  
0.9195  
0.9197  
0.9197  
0.9197  
0.9197  
0.9197  
0.9197  
0.9198  
0.9198  
0.9198  
0.9201  
0.9206  
0.9206  
0.9208  
0.9208  
0.9208  
0.9208  
0.9208  
0.9209  
0.9209  
0.9209  
0.9214  
0.9214  
0.9215  
0.9218  
0.9219  
0.9219  
0.9220  
0.9220  
0.9220  
0.9220  
0.9223  
0.9224  
0.9224  
0.9224  
0.9224  
0.9224  
0.9224



0.9246  
0.9246  
0.9247  
0.9248  
0.9248  
0.9248  
0.9249  
0.9249  
0.9249  
0.9249  
0.9249  
0.9250  
0.9254  
0.9254  
0.9254  
0.9254  
0.9254  
0.9254  
0.9254  
0.9256  
0.9256  
0.9256  
0.9257  
0.9257  
0.9257  
0.9257  
0.9257  
0.9257  
0.9257  
0.9257  
0.9257  
0.9257  
0.9258  
0.9259  
0.9262  
0.9262  
0.9262  
0.9262  
0.9262  
0.9264  
0.9264  
0.9264  
0.9264  
0.9264  
0.9264  
0.9264  
0.9264  
0.9264  
0.9267  
0.9269  
0.9269  
0.9269  
0.9269  
0.9270  
0.9270

0.9270  
0.9270  
0.9270  
0.9270  
0.9270  
0.9270  
0.9270  
0.9270  
0.9270  
0.9272  
0.9272  
0.9273  
0.9273  
0.9274  
0.9275  
0.9275  
0.9275  
0.9275  
0.9275  
0.9275  
0.9275  
0.9275  
0.9275  
0.9275  
0.9275  
0.9275  
0.9276  
0.9277  
0.9277  
0.9277  
0.9277  
0.9278  
0.9278  
0.9278  
0.9281  
0.9281  
0.9281  
0.9282  
0.9283  
0.9283  
0.9284  
0.9284  
0.9284  
0.9284  
0.9284  
0.9284

0.9285  
0.9287  
0.9287  
0.9289  
0.9289  
0.9289  
0.9289  
0.9290  
0.9290  
0.9290  
0.9290  
0.9290  
0.9290  
0.9291  
0.9291  
0.9291  
0.9291  
0.9292  
0.9292  
0.9293  
0.9295  
0.9295  
0.9295  
0.9295  
0.9295  
0.9295  
0.9296  
0.9296  
0.9296  
0.9296  
0.9296  
0.9296  
0.9296  
0.9296  
0.9296  
0.9296  
0.9296  
0.9296  
0.9299  
0.9299  
0.9299  
0.9302  
0.9302  
0.9302  
0.9303  
0.9303  
0.9304  
0.9304  
0.9304  
0.9304  
0.9304

0.9304  
0.9304  
0.9304  
0.9304  
0.9304  
0.9304  
0.9305  
0.9306  
0.9306  
0.9306  
0.9306  
0.9306  
0.9306  
0.9306  
0.9306  
0.9306  
0.9306  
0.9306  
0.9306  
0.9306  
0.9306  
0.9307  
0.9307  
0.9307  
0.9309  
0.9309  
0.9310  
0.9311  
0.9312  
0.9313  
0.9316  
0.9317  
0.9319  
0.9319  
0.9319  
0.9319  
0.9319  
0.9319  
0.9319  
0.9320  
0.9320  
0.9320  
0.9321  
0.9321  
0.9321  
0.9321  
0.9321  
0.9322  
0.9322  
0.9322  
0.9322  
0.9322  
0.9322  
0.9323

[illegible]

0.9332  
0.9335  
0.9335  
0.9335  
0.9335  
0.9335  
0.9335  
0.9336  
0.9338  
0.9339  
0.9339  
0.9339  
0.9339  
0.9339  
0.9339  
0.9339  
0.9339  
0.9339  
0.9339  
0.9339  
0.9339  
0.9341  
0.9341  
0.9342  
0.9343  
0.9344  
0.9344  
0.9344  
0.9344  
0.9344  
0.9345  
0.9345  
0.9347  
0.9347  
0.9348  
0.9348  
0.9348  
0.9354  
0.9354  
0.9354  
0.9354  
0.9356  
0.9356  
0.9356  
0.9358  
0.9360



[illegible]

0.9374  
0.9374  
0.9375  
0.9376  
0.9376  
0.9376  
0.9376  
0.9376  
0.9376  
0.9376  
0.9376  
0.9377  
0.9380  
0.9381  
0.9381  
0.9381  
0.9381  
0.9382  
0.9382  
0.9382  
0.9382  
0.9387  
0.9388  
0.9388  
0.9388  
0.9388  
0.9388  
0.9388  
0.9388  
0.9388  
0.9388  
0.9388  
0.9389  
0.9389  
0.9389  
0.9389  
0.9389  
0.9389  
0.9389  
0.9389  
0.9389  
0.9389  
0.9389  
0.9390  
0.9391  
0.9391  
0.9391  
0.9391  
0.9391

0.9391  
0.9391  
0.9391  
0.9391  
0.9391  
0.9391  
0.9391  
0.9391  
0.9391  
0.9391  
0.9391  
0.9391  
0.9391  
0.9391  
0.9391  
0.9391  
0.9391  
0.9393  
0.9393  
0.9394  
0.9394  
0.9394  
0.9394  
0.9395  
0.9396  
0.9396  
0.9396  
0.9396  
0.9396  
0.9397  
0.9397  
0.9397  
0.9397  
0.9397  
0.9397  
0.9397  
0.9397  
0.9397  
0.9397  
0.9397  
0.9397  
0.9397  
0.9398  
0.9400  
0.9401  
0.9403  
0.9403  
0.9403  
0.9403  
0.9403





0.9426  
0.9426  
0.9426  
0.9426  
0.9429  
0.9429  
0.9430  
0.9430  
0.9430  
0.9430  
0.9431  
0.9431  
0.9431  
0.9432  
0.9432  
0.9432  
0.9433  
0.9434  
0.9434  
0.9434  
0.9434  
0.9434  
0.9434  
0.9434  
0.9434  
0.9440  
0.9441  
0.9441  
0.9441  
0.9443  
0.9443  
0.9443  
0.9443  
0.9443  
0.9443  
0.9445  
0.9445  
0.9445  
0.9446  
0.9446  
0.9446  
0.9446  
0.9446  
0.9448  
0.9448  
0.9448  
0.9448  
0.9448  
0.9448  
0.9448  
0.9448

[illegible]

0.9463  
0.9463  
0.9463  
0.9463  
0.9463  
0.9465  
0.9465  
0.9465  
0.9467  
0.9469  
0.9469  
0.9469  
0.9469  
0.9469  
0.9469  
0.9469  
0.9469  
0.9469  
0.9469  
0.9470  
0.9470  
0.9470  
0.9471  
0.9472  
0.9472  
0.9474  
0.9474  
0.9474  
0.9475  
0.9477  
0.9477  
0.9477  
0.9477  
0.9477  
0.9477  
0.9477  
0.9477  
0.9477  
0.9478  
0.9481  
0.9481  
0.9481  
0.9482  
0.9484  
0.9484  
0.9484  
0.9485



0.9487  
0.9490  
0.9490  
0.9490  
0.9490  
0.9490  
0.9490  
0.9490  
0.9490  
0.9490  
0.9490  
0.9490  
0.9490  
0.9490  
0.9493  
0.9494  
0.9496  
0.9496  
0.9498  
0.9498  
0.9499  
0.9499  
0.9499  
0.9500  
0.9500  
0.9500  
0.9500  
0.9501  
0.9501  
0.9501  
0.9501  
0.9501  
0.9501  
0.9501  
0.9501  
0.9501  
0.9501  
0.9501  
0.9501  
0.9501  
0.9501  
0.9502  
0.9502  
0.9502  
0.9502  
0.9502  
0.9502  
0.9503  
0.9503  
0.9503  
0.9503  
0.9510

|        |  |
|--------|--|
| 0.9510 |  |
| 0.9510 |  |
| 0.9510 |  |
| 0.9510 |  |
| 0.9510 |  |
| 0.9510 |  |
| 0.9510 |  |
| 0.9510 |  |
| 0.9510 |  |
| 0.9510 |  |
| 0.9510 |  |
| 0.9510 |  |
| 0.9514 |  |
| 0.9514 |  |
| 0.9514 |  |
| 0.9514 |  |
| 0.9515 |  |
| 0.9515 |  |
| 0.9518 |  |
| 0.9518 |  |
| 0.9518 |  |
| 0.9518 |  |
| 0.9518 |  |
| 0.9518 |  |
| 0.9518 |  |
| 0.9518 |  |
| 0.9518 |  |
| 0.9518 |  |
| 0.9518 |  |
| 0.9518 |  |
| 0.9518 |  |
| 0.9518 |  |
| 0.9518 |  |
| 0.9518 |  |
| 0.9522 |  |
| 0.9522 |  |
| 0.9522 |  |
| 0.9522 |  |
| 0.9522 |  |
| 0.9524 |  |
| 0.9524 |  |
| 0.9524 |  |
| 0.9525 |  |
| 0.9525 |  |
| 0.9525 |  |
| 0.9525 |  |
| 0.9525 |  |
| 0.9526 |  |
| 0.9526 |  |

0.9526  
0.9526  
0.9526  
0.9526  
0.9528  
0.9528  
0.9532  
0.9533  
0.9534  
0.9535  
0.9535  
0.9535  
0.9535  
0.9535  
0.9535  
0.9535  
0.9536  
0.9537  
0.9537  
0.9537  
0.9537  
0.9538  
0.9538  
0.9538  
0.9538  
0.9538  
0.9539  
0.9539  
0.9539  
0.9539  
0.9540  
0.9541  
0.9543  
0.9543  
0.9543  
0.9543  
0.9543  
0.9543  
0.9544  
0.9544  
0.9544  
0.9547  
0.9547  
0.9547  
0.9548  
0.9548  
0.9548  
0.9548  
0.9550

[illegible]

[illegible]

[illegible]

0.9626  
0.9626  
0.9626  
0.9626  
0.9626  
0.9626  
0.9626  
0.9626  
0.9626  
0.9627  
0.9627  
0.9627  
0.9627  
0.9627  
0.9627  
0.9627  
0.9627  
0.9629  
0.9629  
0.9629  
0.9629  
0.9629  
0.9629  
0.9630  
0.9630  
0.9630  
0.9630  
0.9631  
0.9633  
0.9633  
0.9633  
0.9633  
0.9636  
0.9636  
0.9637  
0.9640  
0.9641  
0.9641  
0.9641  
0.9641  
0.9641  
0.9641  
0.9642  
0.9643  
0.9645  
0.9646  
0.9647  
0.9647

[illegible]



0.9666  
0.9666  
0.9666  
0.9666  
0.9666  
0.9666  
0.9666  
0.9666  
0.9666  
0.9667  
0.9667  
0.9667  
0.9667  
0.9667  
0.9667  
0.9667  
0.9667  
0.9668  
0.9668  
0.9668  
0.9668  
0.9668  
0.9668  
0.9668  
0.9668  
0.9668  
0.9668  
0.9668  
0.9668  
0.9668  
0.9668  
0.9668  
0.9668  
0.9668  
0.9668  
0.9669  
0.9669  
0.9669  
0.9669  
0.9670  
0.9670  
0.9670

[illegible]

0.9685  
0.9685  
0.9685  
0.9685  
0.9685  
0.9685  
0.9685  
0.9685  
0.9688  
0.9688  
0.9688  
0.9689  
0.9691  
0.9691  
0.9691  
0.9693  
0.9693  
0.9694  
0.9694  
0.9694  
0.9694  
0.9694  
0.9694  
0.9695  
0.9695  
0.9696  
0.9702  
0.9704  
0.9704  
0.9708  
0.9708  
0.9708  
0.9708  
0.9709  
0.9714  
0.9714  
0.9714  
0.9714  
0.9715  
0.9716  
0.9716  
0.9716  
0.9717  
0.9717  
0.9717  
0.9717  
0.9718  
0.9719  
0.9719  
0.9719

0.9720  
0.9720  
0.9720  
0.9720  
0.9720  
0.9722  
0.9722  
0.9722  
0.9722  
0.9722  
0.9722  
0.9723  
0.9723  
0.9723  
0.9725  
0.9725  
0.9726  
0.9727  
0.9727  
0.9727  
0.9728  
0.9729  
0.9730  
0.9730  
0.9730  
0.9731  
0.9731  
0.9731  
0.9731  
0.9731  
0.9731  
0.9731  
0.9731  
0.9731  
0.9731  
0.9731  
0.9732  
0.9736  
0.9737  
0.9737  
0.9738  
0.9738  
0.9738  
0.9738  
0.9738  
0.9738  
0.9738  
0.9741  
0.9745

0.9745  
0.9747  
0.9747  
0.9748  
0.9748  
0.9749  
0.9750  
0.9750  
0.9751  
0.9751  
0.9751  
0.9751  
0.9751  
0.9751  
0.9751  
0.9751  
0.9751  
0.9753  
0.9754  
0.9754  
0.9755  
0.9755  
0.9755  
0.9755  
0.9755  
0.9755  
0.9755  
0.9755  
0.9755  
0.9755  
0.9755  
0.9755  
0.9756  
0.9756  
0.9756  
0.9756  
0.9756  
0.9756  
0.9756  
0.9756  
0.9756  
0.9756  
0.9756  
0.9757  
0.9757  
0.9757  
0.9757  
0.9759  
0.9759  
0.9759  
0.9759  
0.9759  
0.9759  
0.9759

0.9759  
0.9759  
0.9759  
0.9759  
0.9759  
0.9761  
0.9761  
0.9763  
0.9764  
0.9764  
0.9764  
0.9764  
0.9764  
0.9764  
0.9764  
0.9764  
0.9764  
0.9764  
0.9764  
0.9764  
0.9764  
0.9764  
0.9764  
0.9765  
0.9767  
0.9767  
0.9767  
0.9767  
0.9767  
0.9767  
0.9767  
0.9767  
0.9767  
0.9767  
0.9767  
0.9767  
0.9767  
0.9767  
0.9767  
0.9768  
0.9768  
0.9770  
0.9771  
0.9772  
0.9773  
0.9773  
0.9773  
0.9773  
0.9775  
0.9776  
0.9776  
0.9776  
0.9777  
0.9777  
0.9779







0.9819  
0.9819  
0.9819  
0.9819  
0.9819  
0.9819  
0.9819  
0.9819  
0.9819  
0.9819  
0.9819  
0.9819  
0.9819  
0.9819  
0.9819  
0.9819  
0.9819  
0.9819  
0.9819  
0.9819  
0.9820  
0.9820  
0.9820  
0.9822  
0.9825  
0.9825  
0.9825  
0.9825  
0.9828  
0.9828  
0.9828  
0.9830  
0.9835  
0.9835  
0.9835  
0.9835  
0.9836  
0.9837  
0.9837  
0.9838  
0.9838  
0.9838  
0.9838  
0.9838  
0.9838  
0.9838  
0.9838  
0.9838

0.9838  
0.9838  
0.9842  
0.9842  
0.9842  
0.9842  
0.9843  
0.9844  
0.9844  
0.9845  
0.9846  
0.9846  
0.9846  
0.9847  
0.9847  
0.9847  
0.9847  
0.9847  
0.9847  
0.9848  
0.9856  
0.9856  
0.9856  
0.9857  
0.9857  
0.9857  
0.9858  
0.9858  
0.9858  
0.9861  
0.9862  
0.9862  
0.9862  
0.9863  
0.9863  
0.9863  
0.9863  
0.9863  
0.9863  
0.9863  
0.9863  
0.9863  
0.9863  
0.9863  
0.9863  
0.9865  
0.9865  
0.9866  
0.9866  
0.9866  
0.9867



0.9880  
0.9880  
0.9880  
0.9880  
0.9880  
0.9880  
0.9880  
0.9880  
0.9880  
0.9880  
0.9880  
0.9880  
0.9880  
0.9880  
0.9880  
0.9880  
0.9880  
0.9880  
0.9880  
0.9881  
0.9882  
0.9882  
0.9882  
0.9882  
0.9882  
0.9882  
0.9882  
0.9882  
0.9882  
0.9882  
0.9882  
0.9882  
0.9882  
0.9882  
0.9882  
0.9882  
0.9882  
0.9882  
0.9882  
0.9882  
0.9882  
0.9884  
0.9884  
0.9886  
0.9887  
0.9890  
0.9890  
0.9892  
0.9892  
0.9892  
0.9892  
0.9892  
0.9892  
0.9892  
0.9892

0.9892  
0.9892  
0.9892  
0.9892  
0.9892  
0.9892  
0.9892  
0.9892  
0.9892  
0.9892  
0.9894  
0.9895  
0.9896  
0.9896  
0.9896  
0.9896  
0.9896  
0.9897  
0.9898  
0.9898  
0.9898  
0.9898  
0.9898  
0.9898  
0.9899  
0.9899  
0.9900  
0.9900  
0.9901  
0.9904  
0.9904  
0.9905  
0.9905  
0.9905  
0.9905  
0.9905  
0.9905  
0.9906  
0.9907  
0.9907  
0.9909  
0.9909  
0.9910  
0.9910  
0.9910  
0.9911  
0.9911  
0.9911  
0.9913  
0.9914  
0.9916  
0.9918

0.9918  
0.9918  
0.9919  
0.9922  
0.9922  
0.9922  
0.9924  
0.9924  
0.9925  
0.9925  
0.9925  
0.9925  
0.9925  
0.9928  
0.9928  
0.9928  
0.9928  
0.9929  
0.9929  
0.9929  
0.9930  
0.9931  
0.9931  
0.9931  
0.9932  
0.9932  
0.9932  
0.9932  
0.9932  
0.9936  
0.9936  
0.9936  
0.9936  
0.9936  
0.9936  
0.9938  
0.9938  
0.9938  
0.9938  
0.9938  
0.9940  
0.9940  
0.9940  
0.9940  
0.9940  
0.9940  
0.9940



0.9957  
0.9957  
0.9957  
0.9957  
0.9957  
0.9957  
0.9957  
0.9957  
0.9957  
0.9957  
0.9957  
0.9957  
0.9957  
0.9957  
0.9958  
0.9958  
0.9958  
0.9959  
0.9959  
0.9959  
0.9959  
0.9959  
0.9959  
0.9960  
0.9960  
0.9961  
0.9962  
0.9962  
0.9964  
0.9964  
0.9964  
0.9964  
0.9964  
0.9964  
0.9964  
0.9964  
0.9964  
0.9964  
0.9964  
0.9966  
0.9966  
0.9966  
0.9966  
0.9966  
0.9966  
0.9966  
0.9966





|        |
|--------|
| 0.9989 |
| 0.9989 |
| 0.9989 |
| 0.9989 |
| 0.9989 |
| 0.9989 |
| 0.9989 |
| 0.9991 |
| 0.9991 |
| 0.9991 |
| 0.9991 |
| 0.9992 |
| 0.9992 |
| 0.9992 |
| 0.9992 |
| 0.9995 |
| 0.9995 |
| 0.9995 |
| 0.9995 |
| 0.9996 |
| 0.9997 |
| 0.9997 |
| 0.9997 |
| 0.9997 |
| 0.9997 |
| 0.9997 |
| 0.9997 |
| 0.9997 |
| 0.9999 |
| 0.9999 |
| 0.9999 |
| 1.0000 |
