# Supplementary material for: Whole-Blood Transcriptional Profiles Enable Early Prediction of the Presence of Coronary Atherosclerosis and High-Risk Plaque Features at Coronary CT Angiography
Source: MDPI journal article supplement (doi:10.3390/biomedicines10061309), 2022-06-02
Supplement: s1 [file s1]

**Supplementary Table S3.** Results of cell enrichment analysis

**CAD.vs.noCAD**

| NAME                         | SIZE | ES    | NES   | NOM p-val | q-value  |
|------------------------------|------|-------|-------|-----------|----------|
| T CELLS CD4 NAIVE            | 45   | 0.52  | 4.10  | 0.00E+00  | 0.00E+00 |
| T CELLS CD4 MEMORY RESTING   | 60   | 0.37  | 3.36  | 0.00E+00  | 0.00E+00 |
| T CELLS CD8                  | 62   | 0.34  | 3.18  | 0.00E+00  | 0.00E+00 |
| T CELLS REGULATORY (TREGS)   | 49   | 0.35  | 2.93  | 0.00E+00  | 0.00E+00 |
| T CELLS FOLLICULAR HELPER    | 47   | 0.35  | 2.87  | 0.00E+00  | 0.00E+00 |
| B CELLS MEMORY               | 48   | 0.32  | 2.63  | 0.00E+00  | 1.22E-04 |
| T CELLS CD4 MEMORY ACTIVATED | 29   | 0.38  | 2.46  | 0.00E+00  | 4.73E-04 |
| PLASMA CELLS                 | 30   | 0.30  | 1.99  | 7.95E-03  | 8.80E-03 |
| B CELLS NAIVE                | 49   | 0.23  | 1.90  | 9.44E-03  | 1.36E-02 |
| T CELLS GAMMA DELTA          | 49   | 0.20  | 1.67  | 3.13E-02  | 3.90E-02 |
| NK CELLS RESTING             | 53   | 0.13  | 1.10  | 3.18E-01  | 3.55E-01 |
| NK CELLS ACTIVATED           | 55   | 0.12  | 1.04  | 3.88E-01  | 3.92E-01 |
| MACROPHAGES M2               | 23   | -0.18 | -1.06 | 3.65E-01  | 3.63E-01 |
| DENDRITIC CELLS RESTING      | 29   | -0.19 | -1.22 | 2.20E-01  | 2.42E-01 |
| DENDRITIC CELLS ACTIVATED    | 31   | -0.21 | -1.42 | 9.93E-02  | 1.23E-01 |
| MACROPHAGES M1               | 35   | -0.21 | -1.50 | 7.69E-02  | 1.02E-01 |
| MACROPHAGES M0               | 23   | -0.29 | -1.64 | 3.53E-02  | 6.01E-02 |
| MAST CELLS ACTIVATED         | 19   | -0.41 | -2.11 | 3.58E-03  | 5.12E-03 |
| MAST CELLS RESTING           | 26   | -0.37 | -2.24 | 1.39E-03  | 3.07E-03 |
| MONOCYTES                    | 50   | -0.34 | -2.86 | 0.00E+00  | 0.00E+00 |
| EOSINOPHILS                  | 43   | -0.39 | -3.05 | 0.00E+00  | 0.00E+00 |
| NEUTROPHILS                  | 56   | -0.39 | -3.48 | 0.00E+00  | 0.00E+00 |
