# Supplementary material for: Whole-Blood Transcriptional Profiles Enable Early Prediction of the Presence of Coronary Atherosclerosis and High-Risk Plaque Features at Coronary CT Angiography
Source: MDPI journal article supplement (doi:10.3390/biomedicines10061309), 2022-06-02
Supplement: s1 [file s1]

**Supplementary Table S4.** Results of linear regression analysis: genes significantly associated with high-risk plaque features

| Leaman score |       |         | Segment involvement score (SIS) |       |         | Segment stenosis score (SSS) |       |         |
|--------------|-------|---------|---------------------------------|-------|---------|------------------------------|-------|---------|
| Gene Symbol  | R     | P-value | Gene Symbol                     | R     | P-value | Gene Symbol                  | R     | P-value |
| KMT5A        | 0.75  | 0.0001  | KIAA0930                        | 0.70  | 0.0001  | AC092164.1                   | 0.73  | 0.0002  |
| GSEC         | 0.70  | 0.0003  | MGST2                           | 0.65  | 0.0005  | GSEC                         | 0.72  | 0.0002  |
| SEMA3B       | 0.70  | 0.0003  | FAM20C                          | 0.65  | 0.0005  | KMT5A                        | 0.69  | 0.0004  |
| AC092164.1   | 0.67  | 0.0006  | SPINT1                          | 0.65  | 0.0005  | RGL4                         | 0.64  | 0.0009  |
| LINC01513    | 0.64  | 0.0009  | FUT4                            | 0.65  | 0.0005  | PRMT5                        | 0.63  | 0.0009  |
| ALPL         | 0.64  | 0.0010  | GNA15                           | 0.63  | 0.0007  | P2RX1                        | 0.63  | 0.0011  |
| MAK          | 0.62  | 0.0015  | SRA1                            | 0.63  | 0.0007  | PNPLA1                       | 0.61  | 0.0016  |
| N4BP1        | 0.62  | 0.0014  | PGM5                            | 0.63  | 0.0010  | RCCD1                        | -0.61 | 0.0016  |
| KCNJ15       | 0.61  | 0.0016  | RNPEP                           | 0.63  | 0.0008  | CAMKMT                       | -0.61 | 0.0015  |
| AC040970.1   | 0.61  | 0.0016  | PLP2                            | 0.62  | 0.0009  | AP000919.4                   | -0.63 | 0.0011  |
| ROPN1L       | 0.61  | 0.0017  | HLA-DRB5                        | 0.61  | 0.0012  | HLCS                         | -0.63 | 0.0010  |
| AP000919.4   | -0.61 | 0.0016  | SMARCD3                         | 0.61  | 0.0010  | ST3GAL5                      | -0.64 | 0.0007  |
| AL391058.1   | -0.61 | 0.0016  | RBMS2                           | 0.61  | 0.0013  | ARMCX7P                      | -0.64 | 0.0009  |
| AL603766.1   | -0.61 | 0.0016  | FXYD6                           | 0.61  | 0.0013  | WDR70                        | -0.64 | 0.0004  |
| SCAT1        | -0.61 | 0.0016  | CTSD                            | 0.60  | 0.0013  | MIR762HG                     | -0.67 | 0.0005  |
| FBXO4        | -0.61 | 0.0015  | GRK3                            | 0.60  | 0.0008  | SOCS7                        | -0.68 | 0.0004  |
| WDR70        | -0.62 | 0.0008  | MS4A6A                          | 0.60  | 0.0012  | BRMS1L                       | -0.69 | 0.0004  |
| EXD2         | -0.63 | 0.0012  | ATP11C                          | -0.61 | 0.0012  |                              |       |         |
| AC004801.1   | -0.66 | 0.0006  | ADNP2                           | -0.61 | 0.0013  |                              |       |         |
|              |       |         | FBXO21                          | -0.61 | 0.0012  |                              |       |         |
|              |       |         | ZSWIM5                          | -0.61 | 0.0012  |                              |       |         |
|              |       |         | BTN3A3                          | -0.61 | 0.0010  |                              |       |         |
|              |       |         | TRAV8-3                         | -0.62 | 0.0011  |                              |       |         |
|              |       |         | CCDC183-AS1                     | -0.62 | 0.0011  |                              |       |         |
|              |       |         | NCAPD3                          | -0.63 | 0.0009  |                              |       |         |
|              |       |         | TRAV21                          | -0.64 | 0.0008  |                              |       |         |
|              |       |         | SMN2                            | -0.64 | 0.0007  |                              |       |         |
|              |       |         | ZNF337                          | -0.64 | 0.0007  |                              |       |         |
|              |       |         | AL096816.1                      | -0.65 | 0.0006  |                              |       |         |

|         |       |        |
|---------|-------|--------|
| AHI1    | -0.65 | 0.0006 |
| NFE2L3  | -0.67 | 0.0004 |
| GALNT12 | -0.68 | 0.0003 |
| TRAV20  | -0.70 | 0.0002 |
| AMIGO2  | -0.78 | 0.0000 |

|  | Plaques with density < 150 HU |      |         |             |       |         |
|--|-------------------------------|------|---------|-------------|-------|---------|
|  | Gene Symbol                   | R    | P-value | Gene Symbol | R     | P-value |
|  | AC092746.1                    | 0.73 | 0.0002  | TOB1-AS1    | 0.61  | 0.0019  |
|  | LINC02207                     | 0.71 | 0.0004  | CLEC4D      | 0.61  | 0.0019  |
|  | RNASEL                        | 0.71 | 0.0002  | AFDN        | 0.61  | 0.0022  |
|  | AC093752.1                    | 0.69 | 0.0004  | Z98886.1    | 0.61  | 0.0019  |
|  | C5orf30                       | 0.68 | 0.0005  | HSDL2       | 0.61  | 0.0017  |
|  | PEX2                          | 0.68 | 0.0004  | OSTF1       | 0.61  | 0.0020  |
|  | HERPUD2                       | 0.67 | 0.0004  | APH1B       | 0.61  | 0.0021  |
|  | ATP11B                        | 0.66 | 0.0006  | MAP1LC3B    | 0.61  | 0.0016  |
|  | CEBPB-AS1                     | 0.66 | 0.0008  | SUPT20H     | 0.61  | 0.0014  |
|  | IL18R1                        | 0.66 | 0.0008  | CDC123      | 0.61  | 0.0019  |
|  | HMGB2                         | 0.65 | 0.0008  | ZNF100      | 0.61  | 0.0018  |
|  | KIF1B                         | 0.65 | 0.0009  | SPTY2D1     | 0.60  | 0.0024  |
|  | GPR141                        | 0.64 | 0.0013  | SRPK1       | 0.60  | 0.0019  |
|  | GPBP1L1                       | 0.64 | 0.0009  | TPPP3       | -0.60 | 0.0026  |
|  | IL18RAP                       | 0.64 | 0.0014  | P2RY11      | -0.61 | 0.0021  |
|  | LMTK2                         | 0.63 | 0.0014  | ACSF2       | -0.61 | 0.0019  |
|  | SELENOTP1                     | 0.63 | 0.0014  | XKR7        | -0.61 | 0.0022  |
|  | POLR2C                        | 0.62 | 0.0018  | AGPAT3      | -0.62 | 0.0015  |
|  | DCUN1D3                       | 0.62 | 0.0019  | ALDH1B1     | -0.62 | 0.0018  |
|  | ATXN1                         | 0.62 | 0.0015  | EIF3B       | -0.62 | 0.0012  |
|  | ZNF396                        | 0.62 | 0.0018  | ADCK1       | -0.62 | 0.0014  |
|  | RASGEF1A                      | 0.62 | 0.0015  | C21orf58    | -0.64 | 0.0013  |
|  | GADD45A                       | 0.62 | 0.0018  | VASH1       | -0.64 | 0.0014  |
|  | BMX                           | 0.62 | 0.0017  | AL009179.1  | -0.64 | 0.0012  |
|  | GYG1                          | 0.62 | 0.0014  | IDH3A       | -0.64 | 0.0011  |
|  | ZNF608                        | 0.62 | 0.0020  | NLN         | -0.65 | 0.0009  |
|  | TMX4                          | 0.62 | 0.0019  | PTPDC1      | -0.66 | 0.0009  |
|  | HEATR5A                       | 0.62 | 0.0015  | PTGFRN      | -0.66 | 0.0009  |
|  | GTDC1                         | 0.62 | 0.0019  | AC124944.2  | -0.70 | 0.0003  |
